# Supplementary material for: A Comprehensive Self-Resistance Gene Database for Natural-Product Discovery with an Application to Marine Bacterial Genome Mining
Source: MDPI journal article supplement (doi:10.3390/ijms241512446), 2023-08-04
Supplement: s1 [file s1]

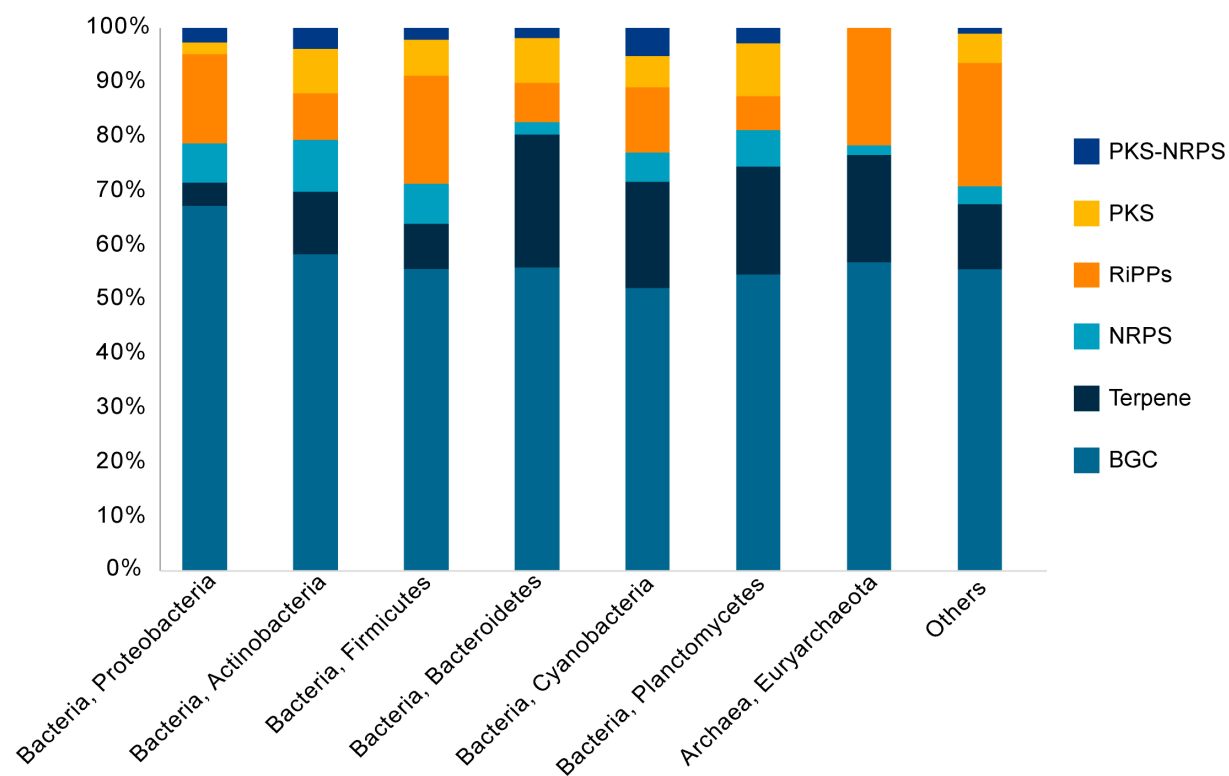

**Figure S1.** Comparison of the different types of BGCs produced by typical bacterial phyla in MarRef.
