# Supplementary material for: A Comprehensive Self-Resistance Gene Database for Natural-Product Discovery with an Application to Marine Bacterial Genome Mining
Source: Int J Mol Sci. 2023 Aug 4;24(15):12446. doi: 10.3390/ijms241512446 (PMC10419868; doi:10.3390/ijms241512446)
Supplement: Supplementary file 1 [file ijms-24-12446-s001.zip › Supplementary Table S1.xlsx]

## Sheet: mibigrg_index
Supplementary Table S1. Resistance Gene Index of MIBiG
MIBiG Accession (116)	Locate in BGC	Protein Accession	Description	Resistance Mechanism
BGC0000275	59-742	AAA67508.1	tetracenomycin_C_resistance_and_export_gene_repressor	efflux pump
BGC0000275	878-2494	AAA67509.1	tetracenomycin_C_resistance_and_export_protein	efflux pump
BGC0000252	9705-10544	AAD37454.1	tetranactin_resistance_protein	target protection
BGC0000833	25380-26855	AAG29799.1	putative_resistance_protein_transporter	efflux pump
BGC0000965	7573-9927	AAL06654.1	UvrA-like_drug_resistance_pump	efflux pump
BGC0000020	2129-3307	AAM54113.1	bicyclomycin_resistant_protein	efflux pump
BGC0000832	31227-32944	AAN65247.1	clorobiocin-resistant_gyrase_B	target alteration
BGC0001101	125637-127256	AAN85545.1	antibiotic_resistance_protein	target protection
BGC0000833	33611-35644	AAO47225.2	resistant_DNA_gyrase_subunit_B	target alteration
BGC0000833	35723-37834	AAO47226.2	resistant_type_II_topoisomerase_subunit_B	target alteration
BGC0000100	10656-12191	AAO65793.1	putative_monensin_resistance_protein	efflux pump
BGC0000612	20732-21064	AAP11961.1	Glyoxalase/Bleomycin_resistance_protein/Dioxygenase_superfamily	product inactivation
BGC0000035	22653-23495	AAS79458.1	putative_resistance_determinant	target alteration
BGC0000437	119654-122698	AAY37661.1	acriflavin_resistance_protein	efflux pump
BGC0000413	86004-87593	AAY93386.1	drug_resistance_transporter_EmrB/QacA_family	efflux pump
BGC0000961	34261-35487	ABC36044.1	drug_resistance_transporter_Bcr/CflA_family_protein_putative	efflux pump
BGC0001011	102792-103271	ABC87517.1	drug_resistance_related_regulator	efflux pump
BGC0001011	107413-107820	ABC87522.1	resistance_related_regulator	efflux pump
BGC0001011	109395-110036	ABC87524.1	drug_resistance_related_regulator	efflux pump
BGC0000283	29141-29692	ABL74382.1	putative_glyoxalase/bleomycin_resistance_protein	product inactivation
BGC0000241	1-1575	ABP54623.1	drug_resistance_transporter_EmrB/QacA_subfamily	efflux pump
BGC0000241	4200-4715	ABP54627.1	Glyoxalase/bleomycin_resistance_protein/dioxygenase	product inactivation
BGC0000241	41876-42286	ABP54661.1	Glyoxalase/bleomycin_resistance_protein/dioxygenase	product inactivation
BGC0000241	42355-43152	ABP54662.1	Glyoxalase/bleomycin_resistance_protein/dioxygenase	product inactivation
BGC0000422	7185-7598	ABQ41263.1	glyoxalase/bleomycin_resistance_protein/dioxygenase	product inactivation
BGC0000333	2574-3518	ABW00319.1	daunorubicin_resistance_ABC_transporter_ATPase_subunit	efflux pump
BGC0000303	10514-12808	ABW71839.1	drug-resistance_pump	efflux pump
BGC0000019	15512-17245	ABW91161.1	exporter/resistance_protein	efflux pump
BGC0000714	10513-11334	ACN38343.1	sisomicin_resistance_protein	target alteration
BGC0000448	18439-20790	ACN39026.1	putative_UvrA-drug_resistance_pump	efflux pump
BGC0001140	37763-38977	ACS13710.1	Resistance_gene	target replacement
BGC0000392	6125-7528	ACU36653.1	drug_resistance_transporter_EmrB/QacA_subfamily	efflux pump
BGC0001392	1040-2248	ACU62749.1	drug_resistance_transporter_Bcr/CflA_subfamily	efflux pump
BGC0001392	18665-20242	ACU62762.1	drug_resistance_transporter_EmrB/QacA_subfamily	efflux pump
BGC0001154	14208-15710	ACU71641.1	drug_resistance_transporter_EmrB/QacA_subfamily	efflux pump
BGC0000807	739-1170	ADD45282.1	Glyoxalase/bleomycin_resistance_protein/dioxygenase	product inactivation
BGC0000379	17743-18837	AEG64685.1	Daunorubicin_resistance_ABC_transporter_ATPase_subunit	efflux pump
BGC0000385	3907-7011	AEH59026.1	acriflavin_resistance_protein	efflux pump
BGC0000385	7008-10205	AEH59027.1	acriflavin_resistance_protein	efflux pump
BGC0000385	67478-70798	AEH59088.1	acriflavin_resistance_protein	efflux pump
BGC0000385	70741-74067	AEH59089.1	acriflavin_resistance_protein	efflux pump
BGC0000385	121303-124524	AEH59103.1	RND_superfamily_protein/acriflavin_resistance_protein	efflux pump
BGC0000385	125987-129211	AEH59105.1	RND_superfamily_protein/acriflavin_resistance_protein	efflux pump
BGC0000001	47233-48660	AEK75506.1	EmrB/QacA_drug_resistance_transporter	efflux pump
BGC0000834	21185-23218	AFI47646.1	resistant_DNA_gyrase_subunit_B	target alteration
BGC0001783	11649-13259	AFW04557.1	drug_resistance_transporter	efflux pump
BGC0001783	29835-31526	AFW04570.1	drug_resistance_transporter	efflux pump
BGC0001783	36550-37014	AFW04576.1	Glyoxalase/bleomycin_resistance_protein	product inactivation
BGC0001783	40939-42450	AFW04581.1	drug_resistance_transporter	efflux pump
BGC0001137	17239-17892	AGL76724.1	putative_drug_resistance_transporter	efflux pump
BGC0001036	35178-36116	AGZ15462.1	daunorubicin_resistance_ABC_transporter	efflux pump
BGC0000002	121208-122458	AHH99938.1	antibiotic_resistance_macrolide_glycosyltransferase	product inactivation
BGC0000806	2444-4057	AHL24451.1	EmrB/QacA_subfamily_drug_resistance_transporter	efflux pump
BGC0000240	45-1619	AHZ61835.1	EmrB/QacA_family_drug_resistance_transporter	efflux pump
BGC0000240	4199-4729	AHZ61839.1	glyoxalase/bleomycin_resistance_protein	product inactivation
BGC0000240	49568-49978	AHZ61879.1	glyoxalase/bleomycin_resistance_protein/dioxygenase	product inactivation
BGC0000240	50046-50843	AHZ61880.1	glyoxalase/bleomycin_resistance_protein/dioxygenase	product inactivation
BGC0001207	4320-7445	AJF34462.1	acriflavin_resistance_protein	efflux pump
BGC0001193	26997-28592	AJI44184.1	drug_resistance_transporter_EmrB/QacA	efflux pump
BGC0001381	11829-12791	AJO72704.1	Glyoxalase/antibiotic_resistance_protein/dioxygenase	product inactivation
BGC0001150	838-2514	AJS09380.1	drug_resistance_transporter_EmrB/QacA_family	efflux pump
BGC0001150	18085-19068	AJS09394.1	Metal-dependent_hydrolase_(resistance)	efflux pump
BGC0001303	89979-91712	ALA09373.1	drug_resistance_transporter_EmrB/QacA	efflux pump
BGC0001397	1426-3753	ALU98419.1	daunorubicin_resistance_protein_DrrC	efflux pump
BGC0001804	8293-9204	AME17995.1	enediyne_self-sacrifice_resistance_protein	product inactivation
BGC0001804	42520-42900	AME18020.1	glyoxalase/bleomycin_resisance_protein/dioxygenase	product inactivation
BGC0001804	44709-45116	AME18022.1	glyoxalase/bleomycin_resisance_protein/dioxygenase	product inactivation
BGC0001804	47612-47986	AME18025.1	glyoxalase/bleomycin_resisance_protein/dioxygenase	product inactivation
BGC0001815	23486-23860	AMK92564.1	glyoxalase/bleomycin_resistance_protein/dioxygenase	product inactivation
BGC0001815	24795-25202	AMK92566.1	glyoxalase/bleomycin_resistance_protein/dioxygenase	product inactivation
BGC0001815	25230-26894	AMK92567.1	tetracenomycin_c_resistance_and_export_protein	efflux pump
BGC0001815	26972-27352	AMK92568.1	glyoxalase/bleomycin_resistance_protein/dioxygenase	product inactivation
BGC0001815	40958-41848	AMK92580.1	enediyne_self-sacrifice_resistance_protein	product inactivation
BGC0001500	29971-31680	AMX23338.1	multidrug_resistance_protein_stp	efflux pump
BGC0001584	1631-3958	ANY94424.1	UvrA-like_drug_resistance_pump	efflux pump
BGC0001693	2518-2943	ARD70853.1	glyoxalase/bleomycin_resistance	product inactivation
BGC0001730	9018-10883	ASA49554.1	drug_resistance_transporter	efflux pump
BGC0001666	43981-45450	ATY46599.1	drug_resistance_transporter	efflux pump
BGC0001611	29371-29736	ATY69562.1	glyoxalase/bleomycin_resistance_protein	product inactivation
BGC0001823	23396-23761	ATY69595.1	glyoxalase/bleomycin_resistance_protein	product inactivation
BGC0001499	2268-3479	AWD37847.1	multidrug_resistance_protein_MdtG	efflux pump
BGC0001719	27650-29188	AWM72923.1	drug_resistance_transporter	efflux pump
BGC0001848	17572-17961	AXO35189.1	glyoxalase/bleomycin_resistance_protein/dioxygenase	product inactivation
BGC0001972	8278-9753	AZS52679.1	putative_multidrug_resistance_efflux_protein	efflux pump
BGC0000086	5870-7438	BAG85020.1	putative_resistance_protein	efflux pump
BGC0000872	20989-24702	BAJ05895.1	putative_ABC_multidrug_resistance_transporter	efflux pump
BGC0000914	9379-10806	CAC36763.1	methylenomycin_A_resistance_protein_Mmr	efflux pump
BGC0000689	22878-23702	CAE06513.1	gentamicin_resistance_ribosomal_methyl_transferase	target alteration
BGC0000695	36896-37372	CAF31562.1	16S_rRNA_methyltransferase_fortimicin_resistance	target alteration
BGC0000352	1-1341	CAG69505.1	putative_multidrug_resistance_pump	efflux pump
BGC0000327	23847-25706	CAJ88628.1	putative_netropsin_resistance_protein_subunit_1	efflux pump
BGC0000327	25706-27541	CAJ88629.1	putative_netropsin_resistance_protein_subunit_2	efflux pump
BGC0000055	52180-53325	CAM00074.1	N-6-aminoadenine-N-methyltransferase_erythromycinresistance	product inactivation
BGC0000087	10490-12046	CAQ64681.1	putative_resistance_protein_transporter	efflux pump
BGC0000571	1-1800	CBW74823.1	Multidrug_resistance_ABC_transporter_ATP-binding_and_permease_protein	efflux pump
BGC0000955	730-2067	CCA29199.1	drug_resistance_transporter	efflux pump
BGC0000171	4106-5683	CCC21115.1	drug_resistance_transporter	efflux pump
BGC0001606	12506-17512	CCT75968.1	related_to_multidrug_resistance_protein	efflux pump
BGC0000212	1-855	EDY42516.1	daunorubicin_resistance_transmembrane_protein	efflux pump
BGC0000212	852-1832	EDY42517.2	daunorubicin_resistance_ATP-binding_protein_DrrA	efflux pump
BGC0001446	14542-15813	EED57520.1	efflux_pump_antibiotic_resistance_protein_putative	efflux pump
BGC0000300	27851-29026	EFL06870.1	major_facilitator_superfamily_transporter_multidrug_resistance_protein	efflux pump
BGC0001447	4482-4871	EHK80150.1	Glyoxalase/bleomycin_resistance_protein/dioxygenase	product inactivation
BGC0001720	24602-25712	EJP62793.1	MFS_multidrug_resistance_transporter_putative	efflux pump
BGC0000172	2638-3810	ERM18785.1	teicoplanin_resistance_protein_VanZ	target alteration
BGC0001074	38604-40889	KDN80074.1	daunorubicin_resistance_protein_DrrC	efflux pump
BGC0000337	84098-88361	MAA_10048	multidrug_resistance_protein	efflux pump
BGC0001658	51779-52702	OAP25822.1	Daunorubicin/doxorubicin_resistance_ATP-binding_protein_DrrA	efflux pump
BGC0001658	52702-53529	OAP25823.1	Daunorubicin/doxorubicin_resistance_ABC_transporter_permease_protein_DrrB	efflux pump
BGC0001968	5955-6893	QBC75016.1	daunorubicin/doxorubicin_resistance_ABC_transporter	efflux pump
BGC0002028	1210-2829	QDG00808.1	drug_resistance_transporter	efflux pump
BGC0000579	2912-3889	WP_007385816.1	daunorubicin_resistance_protein_DrrA_family_ABC_transporter_ATP-binding_protein	efflux pump
BGC0001519	34151-35089	WP_016638473.1	daunorubicin_resistance_protein_DrrA_family_ABC_transporter_ATP-binding_protein	efflux pump
BGC0001655	3756-4697	WP_017534155.1	daunorubicin_resistance_protein_DrrA_family_ABC_transporter_ATP-binding_protein	efflux pump
BGC0001558	35418-36404	WP_017947388.1	daunorubicin_resistance_protein_DrrA_family_ABC_transporter_ATP-binding_protein	efflux pump
BGC0001228	8303-9286	WP_028678143.1	daunorubicin_resistance_protein_DrrA_family_ABC_transporter_ATP-binding_protein	efflux pump

## Sheet: card_index
Supplementary Table S1. Resistance Gene Index of CARD
CARD Accession (4571)	Protein Accession	Description	Resistance Mechanism	Drug Class
ARO:3000005	AAM09849.1	glycopeptide resistance gene cluster;van ligase	target alteration	glycopeptide antibiotic
ARO:3000010	AAA65956.1	glycopeptide resistance gene cluster;van ligase	target alteration	glycopeptide antibiotic
ARO:3000013	AHH83938.1	glycopeptide resistance gene cluster;van ligase	target alteration	glycopeptide antibiotic
ARO:3000024	AAK76137.1	ATP-binding cassette (ABC) antibiotic efflux pump	efflux pump	fluoroquinolone antibiotic
ARO:3000025	AAK76136.1	ATP-binding cassette (ABC) antibiotic efflux pump	efflux pump	fluoroquinolone antibiotic
ARO:3000026	AAU95768.1	multidrug and toxic compound extrusion (MATE) transporter	efflux pump	glycylcycline;tetracycline antibiotic
ARO:3000027	BAA16547.1	major facilitator superfamily (MFS) antibiotic efflux pump	efflux pump	fluoroquinolone antibiotic
ARO:3000074	AAC75733.1	major facilitator superfamily (MFS) antibiotic efflux pump	efflux pump	fluoroquinolone antibiotic
ARO:3000090	AAR20595.1	class A Bacillus anthracis Bla beta-lactamase	product inactivation	penam
ARO:3000118	AAB95639.1	ABC-F ATP-binding cassette ribosomal protection protein	target protection	lincosamide antibiotic;macrolide antibiotic;oxazolidinone antibiotic;phenicol antibiotic;pleuromutilin antibiotic;streptogramin antibiotic;tetracycline antibiotic
ARO:3000124	BAB41258.1	methicillin resistant PBP2	target replacement	carbapenem;cephalosporin;cephamycin;monobactam;penam
ARO:3000149	AAG04518.1	fosfomycin thiol transferase	product inactivation	fosfomycin
ARO:3000165	AAN06707.1	major facilitator superfamily (MFS) antibiotic efflux pump	efflux pump	tetracycline antibiotic
ARO:3000166	BAC67143.1	major facilitator superfamily (MFS) antibiotic efflux pump	efflux pump	tetracycline antibiotic
ARO:3000167	AAK97755.1	major facilitator superfamily (MFS) antibiotic efflux pump	efflux pump	tetracycline antibiotic
ARO:3000168	AAL75563.1	major facilitator superfamily (MFS) antibiotic efflux pump	efflux pump	tetracycline antibiotic
ARO:3000172	AAP08996.1	fosfomycin thiol transferase	product inactivation	fosfomycin
ARO:3000173	AAA71915.1	major facilitator superfamily (MFS) antibiotic efflux pump	efflux pump	tetracycline antibiotic
ARO:3000174	AAD25538.1	major facilitator superfamily (MFS) antibiotic efflux pump	efflux pump	tetracycline antibiotic
ARO:3000175	CAA75663.1	major facilitator superfamily (MFS) antibiotic efflux pump	efflux pump	tetracycline antibiotic
ARO:3000177	AAD12753.1	major facilitator superfamily (MFS) antibiotic efflux pump	efflux pump	tetracycline antibiotic
ARO:3000178	AAB28795.1	major facilitator superfamily (MFS) antibiotic efflux pump	efflux pump	tetracycline antibiotic
ARO:3000179	AAA22851.1	major facilitator superfamily (MFS) antibiotic efflux pump	efflux pump	tetracycline antibiotic
ARO:3000180	AAA20116.1	major facilitator superfamily (MFS) antibiotic efflux pump	efflux pump	tetracycline antibiotic
ARO:3000181	AAB84282.1	major facilitator superfamily (MFS) antibiotic efflux pump	efflux pump	tetracycline antibiotic
ARO:3000182	AAC72341.1	major facilitator superfamily (MFS) antibiotic efflux pump	efflux pump	tetracycline antibiotic
ARO:3000183	AAD25063.1	major facilitator superfamily (MFS) antibiotic efflux pump	efflux pump	tetracycline antibiotic
ARO:3000186	BAB82500.1	tetracycline-resistant ribosomal protection protein	target protection	tetracycline antibiotic
ARO:3000190	AAA23033.2	tetracycline-resistant ribosomal protection protein	target protection	tetracycline antibiotic
ARO:3000191	CAA79727.1	tetracycline-resistant ribosomal protection protein	target protection	tetracycline antibiotic
ARO:3000192	AAA25293.1	tetracycline-resistant ribosomal protection protein	target protection	tetracycline antibiotic
ARO:3000193	AAF01499.1	tetracycline-resistant ribosomal protection protein	target protection	tetracycline antibiotic
ARO:3000194	CAA10975.1	tetracycline-resistant ribosomal protection protein	target protection	tetracycline antibiotic
ARO:3000195	AAA20117.1	tetracycline-resistant ribosomal protection protein	target protection	tetracycline antibiotic
ARO:3000196	ACH87088.1	tetracycline-resistant ribosomal protection protein	target protection	tetracycline antibiotic
ARO:3000197	CAD55718.1	tetracycline-resistant ribosomal protection protein	target protection	tetracycline antibiotic
ARO:3000198	CWV56762.1	fosfomycin thiol transferase	product inactivation	fosfomycin
ARO:3000205	AAA27471.1	tetracycline inactivation enzyme	product inactivation	glycylcycline;tetracycline antibiotic
ARO:3000206	BAA11236.1	major facilitator superfamily (MFS) antibiotic efflux pump	efflux pump	tetracycline antibiotic
ARO:3000215	ABQ47844.1	methicillin resistant PBP2	target replacement	carbapenem;cephalosporin;cephamycin;monobactam;penam
ARO:3000216	AAC73564.1	resistance-nodulation-cell division (RND) antibiotic efflux pump	efflux pump	cephalosporin;fluoroquinolone antibiotic;glycylcycline;penam;phenicol antibiotic;rifamycin antibiotic;tetracycline antibiotic;triclosan
ARO:3000217	ABU39979.1	blaZ beta-lactamase	product inactivation	penam
ARO:3000230	AAC64365.1	ANT(2'')	product inactivation	aminoglycoside antibiotic
ARO:3000237	ACN32294.1	ATP-binding cassette (ABC) antibiotic efflux pump;major facilitator superfamily (MFS) antibiotic efflux pump;resistance-nodulation-cell division (RND) antibiotic efflux pump	efflux pump	aminocoumarin antibiotic;aminoglycoside antibiotic;carbapenem;cephalosporin;cephamycin;fluoroquinolone antibiotic;glycylcycline;macrolide antibiotic;penam;penem;peptide antibiotic;phenicol antibiotic;rifamycin antibiotic;tetracycline antibiotic;triclosan
ARO:3000245	ADV91011.1	RbpA bacterial RNA polymerase-binding protein	target protection	rifamycin antibiotic
ARO:3000250	AAA98296.1	Erm 23S ribosomal RNA methyltransferase	target alteration	lincosamide antibiotic;macrolide antibiotic;streptogramin antibiotic
ARO:3000251	CAA36304.1	ABC-F ATP-binding cassette ribosomal protection protein	target protection	lincosamide antibiotic;macrolide antibiotic;oxazolidinone antibiotic;phenicol antibiotic;pleuromutilin antibiotic;streptogramin antibiotic;tetracycline antibiotic
ARO:3000254	BAA11237.1	major facilitator superfamily (MFS) antibiotic efflux pump	efflux pump	tetracycline antibiotic
ARO:3000263	BAA15221.2	General Bacterial Porin with reduced permeability to beta-lactams;resistance-nodulation-cell division (RND) antibiotic efflux pump	efflux pump	carbapenem;cephalosporin;cephamycin;fluoroquinolone antibiotic;glycylcycline;monobactam;penam;penem;phenicol antibiotic;rifamycin antibiotic;tetracycline antibiotic;triclosan
ARO:3000300	AAO43110.1	ABC-F ATP-binding cassette ribosomal protection protein	target protection	lincosamide antibiotic;macrolide antibiotic;oxazolidinone antibiotic;phenicol antibiotic;pleuromutilin antibiotic;streptogramin antibiotic;tetracycline antibiotic
ARO:3000316	BAA03776.1	macrolide phosphotransferase (MPH)	product inactivation	macrolide antibiotic
ARO:3000318	BAA12910.1	macrolide phosphotransferase (MPH)	product inactivation	macrolide antibiotic
ARO:3000319	BAA34540.1	macrolide phosphotransferase (MPH)	product inactivation	macrolide antibiotic
ARO:3000326	CAB60001.1	Erm 23S ribosomal RNA methyltransferase	target alteration	lincosamide antibiotic;macrolide antibiotic;streptogramin antibiotic
ARO:3000343	CAA03986.1	major facilitator superfamily (MFS) antibiotic efflux pump	efflux pump	tetracycline antibiotic
ARO:3000347	CAA26964.1	Erm 23S ribosomal RNA methyltransferase	target alteration	lincosamide antibiotic;macrolide antibiotic;streptogramin antibiotic
ARO:3000361	AAO38247.1	macrolide esterase	product inactivation	macrolide antibiotic
ARO:3000363	CAA27626.1	macrolide esterase	product inactivation	macrolide antibiotic
ARO:3000368	AAA24786.1	glycopeptide resistance gene cluster;van ligase	target alteration	glycopeptide antibiotic
ARO:3000375	AAF86219.1	Erm 23S ribosomal RNA methyltransferase	target alteration	lincosamide antibiotic;macrolide antibiotic;streptogramin antibiotic
ARO:3000377	AAG03814.1	resistance-nodulation-cell division (RND) antibiotic efflux pump	efflux pump	aminocoumarin antibiotic;carbapenem;cephalosporin;cephamycin;diaminopyrimidine antibiotic;fluoroquinolone antibiotic;macrolide antibiotic;monobactam;penam;penem;peptide antibiotic;phenicol antibiotic;sulfonamide antibiotic;tetracycline antibiotic
ARO:3000378	AAA74437.1	resistance-nodulation-cell division (RND) antibiotic efflux pump	efflux pump	aminocoumarin antibiotic;carbapenem;cephalosporin;cephamycin;diaminopyrimidine antibiotic;fluoroquinolone antibiotic;macrolide antibiotic;monobactam;penam;penem;peptide antibiotic;phenicol antibiotic;sulfonamide antibiotic;tetracycline antibiotic
ARO:3000379	AAG03816.1	resistance-nodulation-cell division (RND) antibiotic efflux pump	efflux pump	acridine dye;aminocoumarin antibiotic;aminoglycoside antibiotic;carbapenem;cephalosporin;cephamycin;diaminopyrimidine antibiotic;disinfecting agents and intercalating dyes;fluoroquinolone antibiotic;macrolide antibiotic;monobactam;penam;penem;peptide antibiotic;phenicol antibiotic;sulfonamide antibiotic;tetracycline antibiotic
ARO:3000380	CAA83855.1	fosC phosphotransferase family	product inactivation	fosfomycin
ARO:3000391	AAS68233.1	major facilitator superfamily (MFS) antibiotic efflux pump	efflux pump	acridine dye;disinfecting agents and intercalating dyes;fluoroquinolone antibiotic
ARO:3000392	CCP44758.1	Erm 23S ribosomal RNA methyltransferase	target alteration	lincosamide antibiotic;macrolide antibiotic;streptogramin antibiotic
ARO:3000410	AEJ33969.1	sulfonamide resistant sul	target replacement	sulfonamide antibiotic;sulfone antibiotic
ARO:3000412	AAL59753.1	sulfonamide resistant sul	target replacement	sulfonamide antibiotic;sulfone antibiotic
ARO:3000413	ACJ63260.1	sulfonamide resistant sul	target replacement	sulfonamide antibiotic;sulfone antibiotic
ARO:3000421	CCQ22388.1	major facilitator superfamily (MFS) antibiotic efflux pump	efflux pump	fluoroquinolone antibiotic
ARO:3000423	BAA32493.1	Fom phosphotransferase family	product inactivation	fosfomycin
ARO:3000444	AIA08936.1	rifampin phosphotransferase	product inactivation	rifamycin antibiotic
ARO:3000448	AEZ36150.1	major facilitator superfamily (MFS) antibiotic efflux pump	efflux pump	fluoroquinolone antibiotic
ARO:3000449	BAA32494.1	Fom phosphotransferase family	product inactivation	fosfomycin
ARO:3000462	ABA28305.2	mgt macrolide glycotransferase	product inactivation	macrolide antibiotic
ARO:3000463	CAA11707.1	gimA family macrolide glycosyltransferase	product inactivation	macrolide antibiotic
ARO:3000467	AEN03071.1	NDM beta-lactamase	product inactivation	carbapenem;cephalosporin;cephamycin;penam
ARO:3000476	CAC80727.1	major facilitator superfamily (MFS) antibiotic efflux pump	efflux pump	tetracycline antibiotic
ARO:3000478	CAD12227.2	major facilitator superfamily (MFS) antibiotic efflux pump	efflux pump	tetracycline antibiotic
ARO:3000481	AAK37619.1	ATP-binding cassette (ABC) antibiotic efflux pump	efflux pump	tetracycline antibiotic
ARO:3000491	BAA16344.1	resistance-nodulation-cell division (RND) antibiotic efflux pump	efflux pump	aminoglycoside antibiotic
ARO:3000495	AAA22597.1	Erm 23S ribosomal RNA methyltransferase	target alteration	lincosamide antibiotic;macrolide antibiotic;streptogramin antibiotic
ARO:3000498	AAA88675.1	Erm 23S ribosomal RNA methyltransferase	target alteration	lincosamide antibiotic;macrolide antibiotic;streptogramin antibiotic
ARO:3000499	AAC76297.1	resistance-nodulation-cell division (RND) antibiotic efflux pump	efflux pump	cephalosporin;cephamycin;fluoroquinolone antibiotic;penam
ARO:3000501	BAD59497.1	rifamycin-resistant beta-subunit of RNA polymerase (rpoB)	target alteration; target replacement	peptide antibiotic;rifamycin antibiotic
ARO:3000502	AAC76298.1	resistance-nodulation-cell division (RND) antibiotic efflux pump	efflux pump	cephalosporin;cephamycin;fluoroquinolone antibiotic;penam
ARO:3000504	AAL19308.1	resistance-nodulation-cell division (RND) antibiotic efflux pump	efflux pump	carbapenem;cephalosporin;cephamycin;monobactam;penam;penem;phenicol antibiotic
ARO:3000508	BAE77778.1	resistance-nodulation-cell division (RND) antibiotic efflux pump	efflux pump	fluoroquinolone antibiotic;macrolide antibiotic;penam
ARO:3000510	AEY83581	antibiotic-resistant isoleucyl-tRNA synthetase (ileS)	target alteration	mupirocin
ARO:3000516	AAC75731.1	major facilitator superfamily (MFS) antibiotic efflux pump	efflux pump	fluoroquinolone antibiotic
ARO:3000518	BAE77933.1	resistance-nodulation-cell division (RND) antibiotic efflux pump	efflux pump	fluoroquinolone antibiotic;macrolide antibiotic;penam
ARO:3000521	CAA53189	antibiotic-resistant isoleucyl-tRNA synthetase (ileS)	target alteration	mupirocin
ARO:3000522	AAC37034.1	Erm 23S ribosomal RNA methyltransferase	target alteration	lincosamide antibiotic;macrolide antibiotic;streptogramin antibiotic
ARO:3000526	CAL34518.1	resistance-nodulation-cell division (RND) antibiotic efflux pump	efflux pump	cephalosporin;fluoroquinolone antibiotic;fusidic acid;macrolide antibiotic
ARO:3000533	AAV85981.1	ATP-binding cassette (ABC) antibiotic efflux pump	efflux pump	macrolide antibiotic
ARO:3000535	AAV85982.1	ATP-binding cassette (ABC) antibiotic efflux pump	efflux pump	macrolide antibiotic
ARO:3000549	ADM92606.1	resistance-nodulation-cell division (RND) antibiotic efflux pump	efflux pump	glycylcycline;tetracycline antibiotic
ARO:3000553	ADM92605.1	resistance-nodulation-cell division (RND) antibiotic efflux pump	efflux pump	glycylcycline;tetracycline antibiotic
ARO:3000556	CBH51823.1	tetracycline-resistant ribosomal protection protein	target protection	tetracycline antibiotic
ARO:3000559	AGV28567.1	resistance-nodulation-cell division (RND) antibiotic efflux pump	efflux pump	carbapenem;cephalosporin;diaminopyrimidine antibiotic;fluoroquinolone antibiotic;lincosamide antibiotic;macrolide antibiotic;penem;phenicol antibiotic;rifamycin antibiotic;tetracycline antibiotic
ARO:3000561	AAD09860.1	major facilitator superfamily (MFS) antibiotic efflux pump	efflux pump	tetracycline antibiotic
ARO:3000565	AAV80464.1	major facilitator superfamily (MFS) antibiotic efflux pump	efflux pump	tetracycline antibiotic
ARO:3000566	AAW66497.1	major facilitator superfamily (MFS) antibiotic efflux pump	efflux pump	tetracycline antibiotic
ARO:3000567	CAM12479.1	major facilitator superfamily (MFS) antibiotic efflux pump	efflux pump	tetracycline antibiotic
ARO:3000569	AAP93922.1	major facilitator superfamily (MFS) antibiotic efflux pump	efflux pump	tetracycline antibiotic
ARO:3000572	ACD35503.1	major facilitator superfamily (MFS) antibiotic efflux pump	efflux pump	tetracycline antibiotic
ARO:3000573	ACS83748.1	major facilitator superfamily (MFS) antibiotic efflux pump	efflux pump	tetracycline antibiotic
ARO:3000578	AAA22904.1	CfiA beta-lactamase	product inactivation	carbapenem
ARO:3000579	AIL46641.1	BlaB beta-lactamase	product inactivation	carbapenem;penam
ARO:3000582	CAB75346.1	L1 family beta-lactamase	product inactivation	cephalosporin
ARO:3000589	CAZ39946.1	NDM beta-lactamase	product inactivation	carbapenem;cephalosporin;cephamycin;penam
ARO:3000590	AEA41876.1	NDM beta-lactamase	product inactivation	carbapenem;cephalosporin;cephamycin;penam
ARO:3000592	CAA66307.2	Erm 23S ribosomal RNA methyltransferase	target alteration	lincosamide antibiotic;macrolide antibiotic;streptogramin antibiotic
ARO:3000593	AAC36915.1	Erm 23S ribosomal RNA methyltransferase	target alteration	lincosamide antibiotic;macrolide antibiotic;streptogramin antibiotic
ARO:3000594	AAU93796.1	Erm 23S ribosomal RNA methyltransferase	target alteration	lincosamide antibiotic;macrolide antibiotic;streptogramin antibiotic
ARO:3000595	AAA98096.1	Erm 23S ribosomal RNA methyltransferase	target alteration	lincosamide antibiotic;macrolide antibiotic;streptogramin antibiotic
ARO:3000596	AAA98484.1	Erm 23S ribosomal RNA methyltransferase	target alteration	lincosamide antibiotic;macrolide antibiotic;streptogramin antibiotic
ARO:3000598	AAC69327.1	Erm 23S ribosomal RNA methyltransferase	target alteration	lincosamide antibiotic;macrolide antibiotic;streptogramin antibiotic
ARO:3000599	CAC86410.1	Erm 23S ribosomal RNA methyltransferase	target alteration	lincosamide antibiotic;macrolide antibiotic;streptogramin antibiotic
ARO:3000600	AAP74657.1	Erm 23S ribosomal RNA methyltransferase	target alteration	lincosamide antibiotic;macrolide antibiotic;streptogramin antibiotic
ARO:3000601	AAN86837.2	Erm 23S ribosomal RNA methyltransferase	target alteration	lincosamide antibiotic;macrolide antibiotic;streptogramin antibiotic
ARO:3000602	AAR92235.1	Erm 23S ribosomal RNA methyltransferase	target alteration	lincosamide antibiotic;macrolide antibiotic;streptogramin antibiotic
ARO:3000603	ABW06859.1	Erm 23S ribosomal RNA methyltransferase	target alteration	lincosamide antibiotic;macrolide antibiotic;streptogramin antibiotic
ARO:3000604	AAK07612.2	Erm 23S ribosomal RNA methyltransferase	target alteration	lincosamide antibiotic;macrolide antibiotic;streptogramin antibiotic
ARO:3000605	AAL68827.1	Erm 23S ribosomal RNA methyltransferase	target alteration	lincosamide antibiotic;macrolide antibiotic;streptogramin antibiotic
ARO:3000606	CAB96921.1	FEZ beta-lactamase	product inactivation	carbapenem;cephalosporin;penam
ARO:3000614	AAK99775.1	major facilitator superfamily (MFS) antibiotic efflux pump	efflux pump	macrolide antibiotic
ARO:3000616	AAL73129.1	ABC-F ATP-binding cassette ribosomal protection protein	target protection	lincosamide antibiotic;macrolide antibiotic;oxazolidinone antibiotic;phenicol antibiotic;pleuromutilin antibiotic;streptogramin antibiotic;tetracycline antibiotic
ARO:3000617	AGC51118.1	methicillin resistant PBP2	target replacement	carbapenem;cephalosporin;cephamycin;monobactam;penam
ARO:3000620	ALH22601.1	resistance-nodulation-cell division (RND) antibiotic efflux pump	efflux pump	fluoroquinolone antibiotic;tetracycline antibiotic
ARO:3000621	ABX30738.1	blaZ beta-lactamase	product inactivation	penam
ARO:3000656	AAC76296.1	resistance-nodulation-cell division (RND) antibiotic efflux pump	efflux pump	cephalosporin;cephamycin;fluoroquinolone antibiotic;glycylcycline;penam;phenicol antibiotic;rifamycin antibiotic;tetracycline antibiotic;triclosan
ARO:3000676	BAB35162.1	major facilitator superfamily (MFS) antibiotic efflux pump;resistance-nodulation-cell division (RND) antibiotic efflux pump	efflux pump	cephalosporin;cephamycin;fluoroquinolone antibiotic;macrolide antibiotic;penam;tetracycline antibiotic
ARO:3000746	BAB56495.1	multidrug and toxic compound extrusion (MATE) transporter	efflux pump	glycylcycline;tetracycline antibiotic
ARO:3000753	BAD89844.2	multidrug and toxic compound extrusion (MATE) transporter	efflux pump	acridine dye;disinfecting agents and intercalating dyes;fluoroquinolone antibiotic;triclosan
ARO:3000768	ACJ59254.1	small multidrug resistance (SMR) antibiotic efflux pump	efflux pump	aminocoumarin antibiotic;macrolide antibiotic
ARO:3000774	AAL14439.1	resistance-nodulation-cell division (RND) antibiotic efflux pump	efflux pump	glycylcycline;tetracycline antibiotic
ARO:3000775	AAL14440.1	resistance-nodulation-cell division (RND) antibiotic efflux pump	efflux pump	glycylcycline;tetracycline antibiotic
ARO:3000777	CAJ77856.1	resistance-nodulation-cell division (RND) antibiotic efflux pump	efflux pump	fluoroquinolone antibiotic;tetracycline antibiotic
ARO:3000778	CAJ77857.1	resistance-nodulation-cell division (RND) antibiotic efflux pump	efflux pump	fluoroquinolone antibiotic;tetracycline antibiotic
ARO:3000779	CAJ77855.1	resistance-nodulation-cell division (RND) antibiotic efflux pump	efflux pump	fluoroquinolone antibiotic;tetracycline antibiotic
ARO:3000780	ACJ41739.1	resistance-nodulation-cell division (RND) antibiotic efflux pump	efflux pump	carbapenem;cephalosporin;diaminopyrimidine antibiotic;fluoroquinolone antibiotic;lincosamide antibiotic;macrolide antibiotic;penem;phenicol antibiotic;rifamycin antibiotic;tetracycline antibiotic
ARO:3000781	AAX14802.1	resistance-nodulation-cell division (RND) antibiotic efflux pump	efflux pump	carbapenem;cephalosporin;diaminopyrimidine antibiotic;fluoroquinolone antibiotic;lincosamide antibiotic;macrolide antibiotic;penem;phenicol antibiotic;rifamycin antibiotic;tetracycline antibiotic
ARO:3000782	AAX14803.1	resistance-nodulation-cell division (RND) antibiotic efflux pump	efflux pump	carbapenem;cephalosporin;diaminopyrimidine antibiotic;fluoroquinolone antibiotic;lincosamide antibiotic;macrolide antibiotic;penem;phenicol antibiotic;rifamycin antibiotic;tetracycline antibiotic
ARO:3000783	ABS43901.1	resistance-nodulation-cell division (RND) antibiotic efflux pump	efflux pump	cephalosporin;fluoroquinolone antibiotic;fusidic acid;macrolide antibiotic
ARO:3000784	ABS43151.1	resistance-nodulation-cell division (RND) antibiotic efflux pump	efflux pump	cephalosporin;fluoroquinolone antibiotic;fusidic acid;macrolide antibiotic
ARO:3000785	BAO79432.1	resistance-nodulation-cell division (RND) antibiotic efflux pump	efflux pump	cephalosporin;fluoroquinolone antibiotic;fusidic acid;macrolide antibiotic
ARO:3000789	AAL19306.1	resistance-nodulation-cell division (RND) antibiotic efflux pump	efflux pump	carbapenem;cephalosporin;cephamycin;monobactam;penam;penem;phenicol antibiotic
ARO:3000790	AAL19305.1	resistance-nodulation-cell division (RND) antibiotic efflux pump	efflux pump	carbapenem;cephalosporin;cephamycin;monobactam;penam;penem;phenicol antibiotic
ARO:3000791	AAL19304.1	resistance-nodulation-cell division (RND) antibiotic efflux pump	efflux pump	carbapenem;cephalosporin;cephamycin;monobactam;penam;penem;phenicol antibiotic
ARO:3000792	AAC75135.2	resistance-nodulation-cell division (RND) antibiotic efflux pump	efflux pump	aminocoumarin antibiotic
ARO:3000793	AAC75136.1	resistance-nodulation-cell division (RND) antibiotic efflux pump	efflux pump	aminocoumarin antibiotic
ARO:3000794	AAC75137.1	resistance-nodulation-cell division (RND) antibiotic efflux pump	efflux pump	aminocoumarin antibiotic
ARO:3000795	BAE77781.1	resistance-nodulation-cell division (RND) antibiotic efflux pump	efflux pump	fluoroquinolone antibiotic;macrolide antibiotic;penam
ARO:3000796	AAC76539.1	resistance-nodulation-cell division (RND) antibiotic efflux pump	efflux pump	fluoroquinolone antibiotic;macrolide antibiotic;penam
ARO:3000800	AAB41956.1	resistance-nodulation-cell division (RND) antibiotic efflux pump	efflux pump	aminocoumarin antibiotic;aminoglycoside antibiotic;cephalosporin;diaminopyrimidine antibiotic;fluoroquinolone antibiotic;macrolide antibiotic;penam;phenicol antibiotic;tetracycline antibiotic
ARO:3000801	AAB41957.1	resistance-nodulation-cell division (RND) antibiotic efflux pump	efflux pump	aminocoumarin antibiotic;aminoglycoside antibiotic;cephalosporin;diaminopyrimidine antibiotic;fluoroquinolone antibiotic;macrolide antibiotic;penam;phenicol antibiotic;tetracycline antibiotic
ARO:3000802	AAB41958.1	resistance-nodulation-cell division (RND) antibiotic efflux pump	efflux pump	aminocoumarin antibiotic;aminoglycoside antibiotic;cephalosporin;diaminopyrimidine antibiotic;fluoroquinolone antibiotic;macrolide antibiotic;penam;phenicol antibiotic;tetracycline antibiotic
ARO:3000803	AAG05881.1	resistance-nodulation-cell division (RND) antibiotic efflux pump	efflux pump	diaminopyrimidine antibiotic;fluoroquinolone antibiotic;phenicol antibiotic
ARO:3000804	AAG05882.1	resistance-nodulation-cell division (RND) antibiotic efflux pump	efflux pump	diaminopyrimidine antibiotic;fluoroquinolone antibiotic;phenicol antibiotic
ARO:3000805	AAG05883.1	resistance-nodulation-cell division (RND) antibiotic efflux pump	efflux pump	diaminopyrimidine antibiotic;fluoroquinolone antibiotic;phenicol antibiotic
ARO:3000806	AAG07592.1	resistance-nodulation-cell division (RND) antibiotic efflux pump	efflux pump	acridine dye;disinfecting agents and intercalating dyes;fluoroquinolone antibiotic;tetracycline antibiotic
ARO:3000807	AAG07593.1	resistance-nodulation-cell division (RND) antibiotic efflux pump	efflux pump	acridine dye;disinfecting agents and intercalating dyes;fluoroquinolone antibiotic;tetracycline antibiotic
ARO:3000808	AAG07594.1	resistance-nodulation-cell division (RND) antibiotic efflux pump	efflux pump	acridine dye;disinfecting agents and intercalating dyes;fluoroquinolone antibiotic;tetracycline antibiotic
ARO:3000809	AAG07595.1	resistance-nodulation-cell division (RND) antibiotic efflux pump	efflux pump	acridine dye;disinfecting agents and intercalating dyes;fluoroquinolone antibiotic;tetracycline antibiotic
ARO:3000810	AAF42063.1	resistance-nodulation-cell division (RND) antibiotic efflux pump	efflux pump	macrolide antibiotic;penam
ARO:3000811	AAF42062.1	resistance-nodulation-cell division (RND) antibiotic efflux pump	efflux pump	macrolide antibiotic;penam
ARO:3000812	CAA64891.1	resistance-nodulation-cell division (RND) antibiotic efflux pump	efflux pump	macrolide antibiotic;penam
ARO:3000815	BAB41874.1	ATP-binding cassette (ABC) antibiotic efflux pump;major facilitator superfamily (MFS) antibiotic efflux pump	efflux pump	acridine dye;cephalosporin;disinfecting agents and intercalating dyes;fluoroquinolone antibiotic;penam;peptide antibiotic;tetracycline antibiotic
ARO:3000816	CCP46065.1	resistance-nodulation-cell division (RND) antibiotic efflux pump	efflux pump	macrolide antibiotic;penam
ARO:3000822	AAK99679.1	major facilitator superfamily (MFS) antibiotic efflux pump	efflux pump	fluoroquinolone antibiotic
ARO:3000823	AFK13828.1	General Bacterial Porin with reduced permeability to beta-lactams;resistance-nodulation-cell division (RND) antibiotic efflux pump	efflux pump	carbapenem;cephalosporin;cephamycin;fluoroquinolone antibiotic;glycylcycline;monobactam;penam;penem;phenicol antibiotic;rifamycin antibiotic;tetracycline antibiotic;triclosan
ARO:3000826	AAL20862.1	resistance-nodulation-cell division (RND) antibiotic efflux pump	efflux pump	cephalosporin;fluoroquinolone antibiotic;glycylcycline;penam;phenicol antibiotic;rifamycin antibiotic;tetracycline antibiotic;triclosan
ARO:3000828	BAA15935.1	resistance-nodulation-cell division (RND) antibiotic efflux pump	efflux pump	aminocoumarin antibiotic;aminoglycoside antibiotic
ARO:3000829	BAA15934.1	resistance-nodulation-cell division (RND) antibiotic efflux pump	efflux pump	aminocoumarin antibiotic;aminoglycoside antibiotic
ARO:3000830	BAB38260.1	resistance-nodulation-cell division (RND) antibiotic efflux pump	efflux pump	aminocoumarin antibiotic;aminoglycoside antibiotic
ARO:3000832	BAB36671.1	major facilitator superfamily (MFS) antibiotic efflux pump;resistance-nodulation-cell division (RND) antibiotic efflux pump	efflux pump	fluoroquinolone antibiotic;macrolide antibiotic;penam;tetracycline antibiotic
ARO:3000833	AAC75429.1	major facilitator superfamily (MFS) antibiotic efflux pump;resistance-nodulation-cell division (RND) antibiotic efflux pump	efflux pump	fluoroquinolone antibiotic;macrolide antibiotic;penam;tetracycline antibiotic
ARO:3000838	ATC67679.1	major facilitator superfamily (MFS) antibiotic efflux pump	efflux pump	acridine dye;disinfecting agents and intercalating dyes;fluoroquinolone antibiotic
ARO:3000839	ABD30512.1	major facilitator superfamily (MFS) antibiotic efflux pump	efflux pump	acridine dye;disinfecting agents and intercalating dyes;fluoroquinolone antibiotic
ARO:3000840	AAK38324.1	JOHN beta-lactamase	product inactivation	carbapenem;cephalosporin;penam
ARO:3000841	ABS29619.1	CGB beta-lactamase	product inactivation	carbapenem;cephalosporin;penam
ARO:3000842	AAN32638.1	EBR beta-lactamase	product inactivation	carbapenem;cephalosporin;penam
ARO:3000843	AAN63647.1	MUS beta-lactamase	product inactivation	carbapenem
ARO:3000844	AAN63648.1	TUS beta-lactamase	product inactivation	carbapenem;cephalosporin;cephamycin
ARO:3000845	CAF05908.1	GIM beta-lactamase	product inactivation	carbapenem;cephalosporin;cephamycin;monobactam;penam;penem
ARO:3000846	ACT66697.1	SIM beta-lactamase	product inactivation	carbapenem;cephalosporin;penam
ARO:3000847	BAF91108.1	KHM beta-lactamase	product inactivation	carbapenem;cephalosporin;cephamycin;penam;penem
ARO:3000848	AGC92784.1	DIM beta-lactamase	product inactivation	carbapenem;cephalosporin
ARO:3000849	AAF09244.1	SFH beta-lactamase	product inactivation	carbapenem
ARO:3000850	AAF04458.1	GOB beta-lactamase	product inactivation	carbapenem;cephalosporin;penam
ARO:3000851	CAC33832.1	THIN-B beta-lactamase	product inactivation	carbapenem;cephalosporin;penam
ARO:3000853	CAQ53840.1	AIM beta-lactamase	product inactivation	cephalosporin;cephamycin;penam
ARO:3000854	BAL14456.1	SMB beta-lactamase	product inactivation	carbapenem;cephalosporin;penam
ARO:3000855	CAC87665.1	CAU beta-lactamase	product inactivation	carbapenem;penam
ARO:3000856	AND91341.1	BJP beta-lactamase	product inactivation	carbapenem
ARO:3000858	ADC55560.1	16S rRNA methyltransferase (G1405)	target alteration	aminoglycoside antibiotic
ARO:3000859	BAC20579.1	16S rRNA methyltransferase (G1405)	target alteration	aminoglycoside antibiotic
ARO:3000860	CAP07796.1	16S rRNA methyltransferase (G1405)	target alteration	aminoglycoside antibiotic
ARO:3000861	AIA09786.1	16S rRNA methyltransferase (G1405)	target alteration	aminoglycoside antibiotic
ARO:3000862	WP_063978071.1	16S rRNA methyltransferase (G1405)	target alteration	aminoglycoside antibiotic
ARO:3000865	ABA42119.2	ole glycosyltransferase	product inactivation	macrolide antibiotic
ARO:3000866	ABA42118.2	ole glycosyltransferase	product inactivation	macrolide antibiotic
ARO:3000873	CAD09800.1	TEM beta-lactamase	product inactivation	cephalosporin;monobactam;penam;penem
ARO:3000874	CAA38429.1	TEM beta-lactamase	product inactivation	cephalosporin;monobactam;penam;penem
ARO:3000875	CAA45828.1	TEM beta-lactamase	product inactivation	cephalosporin;monobactam;penam;penem
ARO:3000876	CDR98216.1	TEM beta-lactamase	product inactivation	cephalosporin;monobactam;penam;penem
ARO:3000877	WP_109963600.1	TEM beta-lactamase	product inactivation	cephalosporin;monobactam;penam;penem
ARO:3000878	CAA41038.1	TEM beta-lactamase	product inactivation	cephalosporin;monobactam;penam;penem
ARO:3000879	AAO33760.1	TEM beta-lactamase	product inactivation	cephalosporin;monobactam;penam;penem
ARO:3000880	CAA46344.1	TEM beta-lactamase	product inactivation	cephalosporin;monobactam;penam;penem
ARO:3000881	WP_102607453.1	TEM beta-lactamase	product inactivation	cephalosporin;monobactam;penam;penem
ARO:3000882	AAC72362.1	TEM beta-lactamase	product inactivation	cephalosporin;monobactam;penam;penem
ARO:3000883	AAW66604.1	TEM beta-lactamase	product inactivation	cephalosporin;monobactam;penam;penem
ARO:3000884	AAA25053.1	TEM beta-lactamase	product inactivation	cephalosporin;monobactam;penam;penem
ARO:3000886	CAO98721.1	TEM beta-lactamase	product inactivation	cephalosporin;monobactam;penam;penem
ARO:3000887	CAA46346.1	TEM beta-lactamase	product inactivation	cephalosporin;monobactam;penam;penem
ARO:3000888	CAA74912.2	TEM beta-lactamase	product inactivation	cephalosporin;monobactam;penam;penem
ARO:3000890	AFN21551.1	TEM beta-lactamase	product inactivation	cephalosporin;monobactam;penam;penem
ARO:3000891	CAA76793.1	TEM beta-lactamase	product inactivation	cephalosporin;monobactam;penam;penem
ARO:3000892	CAA76794.1	TEM beta-lactamase	product inactivation	cephalosporin;monobactam;penam;penem
ARO:3000893	CAA76795.1	TEM beta-lactamase	product inactivation	cephalosporin;monobactam;penam;penem
ARO:3000894	CAA46345.1	TEM beta-lactamase	product inactivation	cephalosporin;monobactam;penam;penem
ARO:3000896	WP_047028173.1	TEM beta-lactamase	product inactivation	cephalosporin;monobactam;penam;penem
ARO:3000898	AAC32891.1	TEM beta-lactamase	product inactivation	cephalosporin;monobactam;penam;penem
ARO:3000899	CAA76796.1	TEM beta-lactamase	product inactivation	cephalosporin;monobactam;penam;penem
ARO:3000900	CAD24670.1	TEM beta-lactamase	product inactivation	cephalosporin;monobactam;penam;penem
ARO:3000901	WP_165539487.1	TEM beta-lactamase	product inactivation	cephalosporin;monobactam;penam;penem
ARO:3000902	WP_052944427.1	TEM beta-lactamase	product inactivation	cephalosporin;monobactam;penam;penem
ARO:3000903	ADL13944.1	TEM beta-lactamase	product inactivation	cephalosporin;monobactam;penam;penem
ARO:3000904	AGE11905.1	TEM beta-lactamase	product inactivation	cephalosporin;monobactam;penam;penem
ARO:3000905	WP_063864910.1	TEM beta-lactamase	product inactivation	cephalosporin;monobactam;penam;penem
ARO:3000906	WP_075985685.1	TEM beta-lactamase	product inactivation	cephalosporin;monobactam;penam;penem
ARO:3000907	WP_159373457.1	TEM beta-lactamase	product inactivation	cephalosporin;monobactam;penam;penem
ARO:3000909	WP_148044474.1	TEM beta-lactamase	product inactivation	cephalosporin;monobactam;penam;penem
ARO:3000910	CBX53726.1	TEM beta-lactamase	product inactivation	cephalosporin;monobactam;penam;penem
ARO:3000911	CAA66659.1	TEM beta-lactamase	product inactivation	cephalosporin;monobactam;penam;penem
ARO:3000912	AAC32889.2	TEM beta-lactamase	product inactivation	cephalosporin;monobactam;penam;penem
ARO:3000914	CAA64682.1	TEM beta-lactamase	product inactivation	cephalosporin;monobactam;penam;penem
ARO:3000916	CAA71322.1	TEM beta-lactamase	product inactivation	cephalosporin;monobactam;penam;penem
ARO:3000917	CAA71323.1	TEM beta-lactamase	product inactivation	cephalosporin;monobactam;penam;penem
ARO:3000918	CAA71324.1	TEM beta-lactamase	product inactivation	cephalosporin;monobactam;penam;penem
ARO:3000921	CAA73933.1	TEM beta-lactamase	product inactivation	cephalosporin;monobactam;penam;penem
ARO:3000922	AAD22538.1	TEM beta-lactamase	product inactivation	cephalosporin;monobactam;penam;penem
ARO:3000923	AAD22539.1	TEM beta-lactamase	product inactivation	cephalosporin;monobactam;penam;penem
ARO:3000924	ABB97007.1	TEM beta-lactamase	product inactivation	cephalosporin;monobactam;penam;penem
ARO:3000926	ACJ43254.1	TEM beta-lactamase	product inactivation	cephalosporin;monobactam;penam;penem
ARO:3000928	AAD45935.1	TEM beta-lactamase	product inactivation	cephalosporin;monobactam;penam;penem
ARO:3000929	AAC05975.1	TEM beta-lactamase	product inactivation	cephalosporin;monobactam;penam;penem
ARO:3000931	AAK17194.1	TEM beta-lactamase	product inactivation	cephalosporin;monobactam;penam;penem
ARO:3000934	AAD33116.2	TEM beta-lactamase	product inactivation	cephalosporin;monobactam;penam;penem
ARO:3000935	CAB92324.1	TEM beta-lactamase	product inactivation	cephalosporin;monobactam;penam;penem
ARO:3000936	AAF01046.1	TEM beta-lactamase	product inactivation	cephalosporin;monobactam;penam;penem
ARO:3000937	AAL03985.1	TEM beta-lactamase	product inactivation	cephalosporin;monobactam;penam;penem
ARO:3000938	AAF19151.1	TEM beta-lactamase	product inactivation	cephalosporin;monobactam;penam;penem
ARO:3000939	CAB65358.1	TEM beta-lactamase	product inactivation	cephalosporin;monobactam;penam;penem
ARO:3000941	AAN05028.1	TEM beta-lactamase	product inactivation	cephalosporin;monobactam;penam;penem
ARO:3000942	AAF05613.1	TEM beta-lactamase	product inactivation	cephalosporin;monobactam;penam;penem
ARO:3000944	AAF05612.1	TEM beta-lactamase	product inactivation	cephalosporin;monobactam;penam;penem
ARO:3000946	AAF05611.1	TEM beta-lactamase	product inactivation	cephalosporin;monobactam;penam;penem
ARO:3000947	AAM15527.1	TEM beta-lactamase	product inactivation	cephalosporin;monobactam;penam;penem
ARO:3000948	AAL29433.1	TEM beta-lactamase	product inactivation	cephalosporin;monobactam;penam;penem
ARO:3000949	AAL29434.1	TEM beta-lactamase	product inactivation	cephalosporin;monobactam;penam;penem
ARO:3000950	AAL29435.1	TEM beta-lactamase	product inactivation	cephalosporin;monobactam;penam;penem
ARO:3000951	AAL29436.1	TEM beta-lactamase	product inactivation	cephalosporin;monobactam;penam;penem
ARO:3000952	CAC43229.1	TEM beta-lactamase	product inactivation	cephalosporin;monobactam;penam;penem
ARO:3000953	CAC43230.1	TEM beta-lactamase	product inactivation	cephalosporin;monobactam;penam;penem
ARO:3000954	AAG44570.1	TEM beta-lactamase	product inactivation	cephalosporin;monobactam;penam;penem
ARO:3000955	AAK14792.1	TEM beta-lactamase	product inactivation	cephalosporin;monobactam;penam;penem
ARO:3000956	AAK71474.1	TEM beta-lactamase	product inactivation	cephalosporin;monobactam;penam;penem
ARO:3000957	AAK30619.1	TEM beta-lactamase	product inactivation	cephalosporin;monobactam;penam;penem
ARO:3000958	BAB16308.1	TEM beta-lactamase	product inactivation	cephalosporin;monobactam;penam;penem
ARO:3000959	AAF66653.1	TEM beta-lactamase	product inactivation	cephalosporin;monobactam;penam;penem
ARO:3000960	CAC85660.1	TEM beta-lactamase	product inactivation	cephalosporin;monobactam;penam;penem
ARO:3000961	CAC85661.1	TEM beta-lactamase	product inactivation	cephalosporin;monobactam;penam;penem
ARO:3000962	CAC67290.1	TEM beta-lactamase	product inactivation	cephalosporin;monobactam;penam;penem
ARO:3000963	AAM22276.1	TEM beta-lactamase	product inactivation	cephalosporin;monobactam;penam;penem
ARO:3000964	AAM18924.1	TEM beta-lactamase	product inactivation	cephalosporin;monobactam;penam;penem
ARO:3000965	AAK82652.1	TEM beta-lactamase	product inactivation	cephalosporin;monobactam;penam;penem
ARO:3000967	AAM61952.1	TEM beta-lactamase	product inactivation	cephalosporin;monobactam;penam;penem
ARO:3000968	AAM61953.1	TEM beta-lactamase	product inactivation	cephalosporin;monobactam;penam;penem
ARO:3000969	AAM52207.1	TEM beta-lactamase	product inactivation	cephalosporin;monobactam;penam;penem
ARO:3000970	AAM52215.1	TEM beta-lactamase	product inactivation	cephalosporin;monobactam;penam;penem
ARO:3000971	AAM28884.1	TEM beta-lactamase	product inactivation	cephalosporin;monobactam;penam;penem
ARO:3000972	AAT46413.1	TEM beta-lactamase	product inactivation	cephalosporin;monobactam;penam;penem
ARO:3000973	AAL68923.1	TEM beta-lactamase	product inactivation	cephalosporin;monobactam;penam;penem
ARO:3000974	AAL77062.1	TEM beta-lactamase	product inactivation	cephalosporin;monobactam;penam;penem
ARO:3000975	AAS89982.1	TEM beta-lactamase	product inactivation	cephalosporin;monobactam;penam;penem
ARO:3000976	AAS89983.1	TEM beta-lactamase	product inactivation	cephalosporin;monobactam;penam;penem
ARO:3000977	AAS89984.1	TEM beta-lactamase	product inactivation	cephalosporin;monobactam;penam;penem
ARO:3000978	AAN04881.1	TEM beta-lactamase	product inactivation	cephalosporin;monobactam;penam;penem
ARO:3000979	AAB39956.1	TEM beta-lactamase	product inactivation	cephalosporin;monobactam;penam;penem
ARO:3000980	AAN05026.1	TEM beta-lactamase	product inactivation	cephalosporin;monobactam;penam;penem
ARO:3000981	AAN05029.1	TEM beta-lactamase	product inactivation	cephalosporin;monobactam;penam;penem
ARO:3000982	AAO85882.1	TEM beta-lactamase	product inactivation	cephalosporin;monobactam;penam;penem
ARO:3000983	AAQ01671.1	TEM beta-lactamase	product inactivation	cephalosporin;monobactam;penam;penem
ARO:3000984	AAQ98890.1	TEM beta-lactamase	product inactivation	cephalosporin;monobactam;penam;penem
ARO:3000985	AAQ93490.1	TEM beta-lactamase	product inactivation	cephalosporin;monobactam;penam;penem
ARO:3000986	AAQ93491.1	TEM beta-lactamase	product inactivation	cephalosporin;monobactam;penam;penem
ARO:3000987	AAT46414.1	TEM beta-lactamase	product inactivation	cephalosporin;monobactam;penam;penem
ARO:3000988	AAT45742.1	TEM beta-lactamase	product inactivation	cephalosporin;monobactam;penam;penem
ARO:3000989	AAR89358.1	TEM beta-lactamase	product inactivation	cephalosporin;monobactam;penam;penem
ARO:3000990	AAR89359.1	TEM beta-lactamase	product inactivation	cephalosporin;monobactam;penam;penem
ARO:3000993	CAG34105.1	TEM beta-lactamase	product inactivation	cephalosporin;monobactam;penam;penem
ARO:3000994	CAI29263.1	TEM beta-lactamase	product inactivation	cephalosporin;monobactam;penam;penem
ARO:3000995	AAR10958.1	TEM beta-lactamase	product inactivation	cephalosporin;monobactam;penam;penem
ARO:3000996	AAR84298.1	TEM beta-lactamase	product inactivation	cephalosporin;monobactam;penam;penem
ARO:3000997	AAS19171.1	TEM beta-lactamase	product inactivation	cephalosporin;monobactam;penam;penem
ARO:3000998	AAS79107.1	TEM beta-lactamase	product inactivation	cephalosporin;monobactam;penam;penem
ARO:3000999	CAG25427.1	TEM beta-lactamase	product inactivation	cephalosporin;monobactam;penam;penem
ARO:3001000	AAV83795.1	TEM beta-lactamase	product inactivation	cephalosporin;monobactam;penam;penem
ARO:3001001	CAL08007.1	TEM beta-lactamase	product inactivation	cephalosporin;monobactam;penam;penem
ARO:3001002	AAW47922.1	TEM beta-lactamase	product inactivation	cephalosporin;monobactam;penam;penem
ARO:3001003	AAZ23494.1	TEM beta-lactamase	product inactivation	cephalosporin;monobactam;penam;penem
ARO:3001004	AAX56615.1	TEM beta-lactamase	product inactivation	cephalosporin;monobactam;penam;penem
ARO:3001005	ABD60314.1	TEM beta-lactamase	product inactivation	cephalosporin;monobactam;penam;penem
ARO:3001006	AAY85632.1	TEM beta-lactamase	product inactivation	cephalosporin;monobactam;penam;penem
ARO:3001007	CAJ17558.1	TEM beta-lactamase	product inactivation	cephalosporin;monobactam;penam;penem
ARO:3001012	AAZ14083.2	TEM beta-lactamase	product inactivation	cephalosporin;monobactam;penam;penem
ARO:3001013	AAZ14084.2	TEM beta-lactamase	product inactivation	cephalosporin;monobactam;penam;penem
ARO:3001014	ABB84515.1	TEM beta-lactamase	product inactivation	cephalosporin;monobactam;penam;penem
ARO:3001015	CAJ32372.1	TEM beta-lactamase	product inactivation	cephalosporin;monobactam;penam;penem
ARO:3001016	ABC96711.1	TEM beta-lactamase	product inactivation	cephalosporin;monobactam;penam;penem
ARO:3001017	CAJ66089.1	TEM beta-lactamase	product inactivation	cephalosporin;monobactam;penam;penem
ARO:3001018	ABI74448.1	TEM beta-lactamase	product inactivation	cephalosporin;monobactam;penam;penem
ARO:3001019	ABI74447.1	TEM beta-lactamase	product inactivation	cephalosporin;monobactam;penam;penem
ARO:3001020	ACO07310.1	TEM beta-lactamase	product inactivation	cephalosporin;monobactam;penam;penem
ARO:3001021	ABG77582.1	TEM beta-lactamase	product inactivation	cephalosporin;monobactam;penam;penem
ARO:3001022	CAQ00120.1	TEM beta-lactamase	product inactivation	cephalosporin;monobactam;penam;penem
ARO:3001023	ABI81768.1	TEM beta-lactamase	product inactivation	cephalosporin;monobactam;penam;penem
ARO:3001024	ABQ00181.1	TEM beta-lactamase	product inactivation	cephalosporin;monobactam;penam;penem
ARO:3001025	ABM54869.1	TEM beta-lactamase	product inactivation	cephalosporin;monobactam;penam;penem
ARO:3001026	ABM54870.1	TEM beta-lactamase	product inactivation	cephalosporin;monobactam;penam;penem
ARO:3001028	ABO64442.1	TEM beta-lactamase	product inactivation	cephalosporin;monobactam;penam;penem
ARO:3001029	ACF32746.1	TEM beta-lactamase	product inactivation	cephalosporin;monobactam;penam;penem
ARO:3001030	ABX71157.1	TEM beta-lactamase	product inactivation	cephalosporin;monobactam;penam;penem
ARO:3001032	ACI25375.1	TEM beta-lactamase	product inactivation	cephalosporin;monobactam;penam;penem
ARO:3001033	ACJ04051.1	TEM beta-lactamase	product inactivation	cephalosporin;monobactam;penam;penem
ARO:3001034	ACR22829.1	TEM beta-lactamase	product inactivation	cephalosporin;monobactam;penam;penem
ARO:3001035	ACP18864.1	TEM beta-lactamase	product inactivation	cephalosporin;monobactam;penam;penem
ARO:3001037	ADA79630.1	TEM beta-lactamase	product inactivation	cephalosporin;monobactam;penam;penem
ARO:3001041	ADB90239.1	TEM beta-lactamase	product inactivation	cephalosporin;monobactam;penam;penem
ARO:3001042	CBJ06718.1	TEM beta-lactamase	product inactivation	cephalosporin;monobactam;penam;penem
ARO:3001043	CAA65888.1	TEM beta-lactamase	product inactivation	cephalosporin;monobactam;penam;penem
ARO:3001044	WP_000027060.1	TEM beta-lactamase	product inactivation	cephalosporin;monobactam;penam;penem
ARO:3001045	ADR71220.1	TEM beta-lactamase	product inactivation	cephalosporin;monobactam;penam;penem
ARO:3001046	AET99222.1	TEM beta-lactamase	product inactivation	cephalosporin;monobactam;penam;penem
ARO:3001047	ADM61585.1	TEM beta-lactamase	product inactivation	cephalosporin;monobactam;penam;penem
ARO:3001048	AEL17198.1	TEM beta-lactamase	product inactivation	cephalosporin;monobactam;penam;penem
ARO:3001049	AEL79515.1	TEM beta-lactamase	product inactivation	cephalosporin;monobactam;penam;penem
ARO:3001050	AEL88240.1	TEM beta-lactamase	product inactivation	cephalosporin;monobactam;penam;penem
ARO:3001051	APY23677.1	TEM beta-lactamase	product inactivation	cephalosporin;monobactam;penam;penem
ARO:3001052	AEQ59620.1	TEM beta-lactamase	product inactivation	cephalosporin;monobactam;penam;penem
ARO:3001053	AFC75523.1	TEM beta-lactamase	product inactivation	cephalosporin;monobactam;penam;penem
ARO:3001054	AFC75524.1	TEM beta-lactamase	product inactivation	cephalosporin;monobactam;penam;penem
ARO:3001055	AFC75525.1	TEM beta-lactamase	product inactivation	cephalosporin;monobactam;penam;penem
ARO:3001056	AEK48085.1	TEM beta-lactamase	product inactivation	cephalosporin;monobactam;penam;penem
ARO:3001057	BAL68178.1	TEM beta-lactamase	product inactivation	cephalosporin;monobactam;penam;penem
ARO:3001058	AFN69127.1	TEM beta-lactamase	product inactivation	cephalosporin;monobactam;penam;penem
ARO:3001059	ACR66323.1	SHV beta-lactamase	product inactivation	carbapenem;cephalosporin;penam
ARO:3001060	AAD37413.1	SHV beta-lactamase	product inactivation	carbapenem;cephalosporin;penam
ARO:3001061	CAA66730.1	SHV beta-lactamase	product inactivation	carbapenem;cephalosporin;penam
ARO:3001062	ANA06389.1	SHV beta-lactamase	product inactivation	carbapenem;cephalosporin;penam
ARO:3001063	SPD96731.1	SHV beta-lactamase	product inactivation	carbapenem;cephalosporin;penam
ARO:3001064	CAA39164.1	SHV beta-lactamase	product inactivation	carbapenem;cephalosporin;penam
ARO:3001065	CAA71948.1	SHV beta-lactamase	product inactivation	carbapenem;cephalosporin;penam
ARO:3001066	AAA87176.1	SHV beta-lactamase	product inactivation	carbapenem;cephalosporin;penam
ARO:3001067	AAB51384.1	SHV beta-lactamase	product inactivation	carbapenem;cephalosporin;penam
ARO:3001068	AAB37395.2	SHV beta-lactamase	product inactivation	carbapenem;cephalosporin;penam
ARO:3001070	CAA66729.1	SHV beta-lactamase	product inactivation	carbapenem;cephalosporin;penam
ARO:3001071	CAI76927.1	SHV beta-lactamase	product inactivation	carbapenem;cephalosporin;penam
ARO:3001072	AAD43815.1	SHV beta-lactamase	product inactivation	carbapenem;cephalosporin;penam
ARO:3001073	AAG17550.1	SHV beta-lactamase	product inactivation	carbapenem;cephalosporin;penam
ARO:3001074	CAB37325.2	SHV beta-lactamase	product inactivation	carbapenem;cephalosporin;penam
ARO:3001075	AAC98092.2	SHV beta-lactamase	product inactivation	carbapenem;cephalosporin;penam
ARO:3001076	AAF64386.1	SHV beta-lactamase	product inactivation	carbapenem;cephalosporin;penam
ARO:3001077	AAF34333.1	SHV beta-lactamase	product inactivation	carbapenem;cephalosporin;penam
ARO:3001078	AAF34334.1	SHV beta-lactamase	product inactivation	carbapenem;cephalosporin;penam
ARO:3001079	AAF34335.1	SHV beta-lactamase	product inactivation	carbapenem;cephalosporin;penam
ARO:3001080	AAF34336.1	SHV beta-lactamase	product inactivation	carbapenem;cephalosporin;penam
ARO:3001081	AAF34337.1	SHV beta-lactamase	product inactivation	carbapenem;cephalosporin;penam
ARO:3001082	BAA84973.1	SHV beta-lactamase	product inactivation	carbapenem;cephalosporin;penam
ARO:3001083	AAF37209.2	SHV beta-lactamase	product inactivation	carbapenem;cephalosporin;penam
ARO:3001084	AAF36719.1	SHV beta-lactamase	product inactivation	carbapenem;cephalosporin;penam
ARO:3001085	AAG01039.1	SHV beta-lactamase	product inactivation	carbapenem;cephalosporin;penam
ARO:3001086	AAG15384.1	SHV beta-lactamase	product inactivation	carbapenem;cephalosporin;penam
ARO:3001087	AAG49894.1	SHV beta-lactamase	product inactivation	carbapenem;cephalosporin;penam
ARO:3001088	AAT75225.1	SHV beta-lactamase	product inactivation	carbapenem;cephalosporin;penam
ARO:3001089	AAP33454.2	SHV beta-lactamase	product inactivation	carbapenem;cephalosporin;penam
ARO:3001090	AAK69828.1	SHV beta-lactamase	product inactivation	carbapenem;cephalosporin;penam
ARO:3001091	AFN82060.1	SHV beta-lactamase	product inactivation	carbapenem;cephalosporin;penam
ARO:3001092	AAK64187.1	SHV beta-lactamase	product inactivation	carbapenem;cephalosporin;penam
ARO:3001093	AAL68926.1	SHV beta-lactamase	product inactivation	carbapenem;cephalosporin;penam
ARO:3001094	AAL82592.1	SHV beta-lactamase	product inactivation	carbapenem;cephalosporin;penam
ARO:3001095	AAL82593.1	SHV beta-lactamase	product inactivation	carbapenem;cephalosporin;penam
ARO:3001096	AAL79576.1	SHV beta-lactamase	product inactivation	carbapenem;cephalosporin;penam
ARO:3001098	AAN04882.1	SHV beta-lactamase	product inactivation	carbapenem;cephalosporin;penam
ARO:3001099	AAN04883.1	SHV beta-lactamase	product inactivation	carbapenem;cephalosporin;penam
ARO:3001100	AAN04884.1	SHV beta-lactamase	product inactivation	carbapenem;cephalosporin;penam
ARO:3001101	AAL40899.1	SHV beta-lactamase	product inactivation	carbapenem;cephalosporin;penam
ARO:3001102	AAP82228.1	SHV beta-lactamase	product inactivation	carbapenem;cephalosporin;penam
ARO:3001103	AAN39364.1	SHV beta-lactamase	product inactivation	carbapenem;cephalosporin;penam
ARO:3001104	AAO53445.1	SHV beta-lactamase	product inactivation	carbapenem;cephalosporin;penam
ARO:3001105	AAP03063.1	SHV beta-lactamase	product inactivation	carbapenem;cephalosporin;penam
ARO:3001106	AAS98184.1	SHV beta-lactamase	product inactivation	carbapenem;cephalosporin;penam
ARO:3001107	AAP41108.1	SHV beta-lactamase	product inactivation	carbapenem;cephalosporin;penam
ARO:3001108	AAP41944.1	SHV beta-lactamase	product inactivation	carbapenem;cephalosporin;penam
ARO:3001109	AEJ08681.1	SHV beta-lactamase	product inactivation	carbapenem;cephalosporin;penam
ARO:3001110	AAT01223.1	SHV beta-lactamase	product inactivation	carbapenem;cephalosporin;penam
ARO:3001111	CAI10727.2	SHV beta-lactamase	product inactivation	carbapenem;cephalosporin;penam
ARO:3001112	ACB73258.1	SHV beta-lactamase	product inactivation	carbapenem;cephalosporin;penam
ARO:3001113	AAO66446.1	SHV beta-lactamase	product inactivation	carbapenem;cephalosporin;penam
ARO:3001114	AAV66328.1	SHV beta-lactamase	product inactivation	carbapenem;cephalosporin;penam
ARO:3001115	BAF92780.1	SHV beta-lactamase	product inactivation	carbapenem;cephalosporin;penam
ARO:3001116	CAI30650.2	SHV beta-lactamase	product inactivation	carbapenem;cephalosporin;penam
ARO:3001117	CAI30651.2	SHV beta-lactamase	product inactivation	carbapenem;cephalosporin;penam
ARO:3001118	ABY56290.1	SHV beta-lactamase	product inactivation	carbapenem;cephalosporin;penam
ARO:3001119	ABA06586.1	SHV beta-lactamase	product inactivation	carbapenem;cephalosporin;penam
ARO:3001120	ABA06587.1	SHV beta-lactamase	product inactivation	carbapenem;cephalosporin;penam
ARO:3001121	ABA06588.1	SHV beta-lactamase	product inactivation	carbapenem;cephalosporin;penam
ARO:3001122	ABA06589.1	SHV beta-lactamase	product inactivation	carbapenem;cephalosporin;penam
ARO:3001123	ABA06590.1	SHV beta-lactamase	product inactivation	carbapenem;cephalosporin;penam
ARO:3001124	AAY42633.1	SHV beta-lactamase	product inactivation	carbapenem;cephalosporin;penam
ARO:3001125	CAJ47126.2	SHV beta-lactamase	product inactivation	carbapenem;cephalosporin;penam
ARO:3001126	CAJ47127.2	SHV beta-lactamase	product inactivation	carbapenem;cephalosporin;penam
ARO:3001127	CAJ47128.2	SHV beta-lactamase	product inactivation	carbapenem;cephalosporin;penam
ARO:3001128	CAJ47129.2	SHV beta-lactamase	product inactivation	carbapenem;cephalosporin;penam
ARO:3001129	CAJ47130.2	SHV beta-lactamase	product inactivation	carbapenem;cephalosporin;penam
ARO:3001130	CAJ47131.2	SHV beta-lactamase	product inactivation	carbapenem;cephalosporin;penam
ARO:3001131	CAJ47132.2	SHV beta-lactamase	product inactivation	carbapenem;cephalosporin;penam
ARO:3001132	CAJ47133.2	SHV beta-lactamase	product inactivation	carbapenem;cephalosporin;penam
ARO:3001133	CAJ47134.2	SHV beta-lactamase	product inactivation	carbapenem;cephalosporin;penam
ARO:3001134	CAJ47135.2	SHV beta-lactamase	product inactivation	carbapenem;cephalosporin;penam
ARO:3001135	CAJ47136.2	SHV beta-lactamase	product inactivation	carbapenem;cephalosporin;penam
ARO:3001136	CAJ47137.2	SHV beta-lactamase	product inactivation	carbapenem;cephalosporin;penam
ARO:3001137	CAJ47138.2	SHV beta-lactamase	product inactivation	carbapenem;cephalosporin;penam
ARO:3001138	CAJ32371.1	SHV beta-lactamase	product inactivation	carbapenem;cephalosporin;penam
ARO:3001139	ABC54571.1	SHV beta-lactamase	product inactivation	carbapenem;cephalosporin;penam
ARO:3001140	ABC58727.1	SHV beta-lactamase	product inactivation	carbapenem;cephalosporin;penam
ARO:3001141	ABA60809.1	SHV beta-lactamase	product inactivation	carbapenem;cephalosporin;penam
ARO:3001144	ABH04327.1	SHV beta-lactamase	product inactivation	carbapenem;cephalosporin;penam
ARO:3001145	ABN49110.1	SHV beta-lactamase	product inactivation	carbapenem;cephalosporin;penam
ARO:3001146	ABN49111.1	SHV beta-lactamase	product inactivation	carbapenem;cephalosporin;penam
ARO:3001147	ABN49113.1	SHV beta-lactamase	product inactivation	carbapenem;cephalosporin;penam
ARO:3001148	ABN49112.1	SHV beta-lactamase	product inactivation	carbapenem;cephalosporin;penam
ARO:3001149	ABN49114.1	SHV beta-lactamase	product inactivation	carbapenem;cephalosporin;penam
ARO:3001150	ABV72593.1	SHV beta-lactamase	product inactivation	carbapenem;cephalosporin;penam
ARO:3001151	ABS72342.1	SHV beta-lactamase	product inactivation	carbapenem;cephalosporin;penam
ARO:3001152	ABS72351.1	SHV beta-lactamase	product inactivation	carbapenem;cephalosporin;penam
ARO:3001153	ABX71158.1	SHV beta-lactamase	product inactivation	carbapenem;cephalosporin;penam
ARO:3001154	ACI22621.1	SHV beta-lactamase	product inactivation	carbapenem;cephalosporin;penam
ARO:3001155	CAQ03506.1	SHV beta-lactamase	product inactivation	carbapenem;cephalosporin;penam
ARO:3001156	CAQ03507.1	SHV beta-lactamase	product inactivation	carbapenem;cephalosporin;penam
ARO:3001157	ADR80606.1	SHV beta-lactamase	product inactivation	carbapenem;cephalosporin;penam
ARO:3001158	ACM04459.1	SHV beta-lactamase	product inactivation	carbapenem;cephalosporin;penam
ARO:3001159	AEK48094.1	SHV beta-lactamase	product inactivation	carbapenem;cephalosporin;penam
ARO:3001160	BAF95849.1	SHV beta-lactamase	product inactivation	carbapenem;cephalosporin;penam
ARO:3001164	WP_156404661.1	SHV beta-lactamase	product inactivation	carbapenem;cephalosporin;penam
ARO:3001165	WP_117062210.1	SHV beta-lactamase	product inactivation	carbapenem;cephalosporin;penam
ARO:3001167	AEG79634.1	SHV beta-lactamase	product inactivation	carbapenem;cephalosporin;penam
ARO:3001168	AEI83429.1	SHV beta-lactamase	product inactivation	carbapenem;cephalosporin;penam
ARO:3001169	ADR80609.1	SHV beta-lactamase	product inactivation	carbapenem;cephalosporin;penam
ARO:3001170	ACV32633.1	SHV beta-lactamase	product inactivation	carbapenem;cephalosporin;penam
ARO:3001171	ACV32634.1	SHV beta-lactamase	product inactivation	carbapenem;cephalosporin;penam
ARO:3001172	ACV32635.1	SHV beta-lactamase	product inactivation	carbapenem;cephalosporin;penam
ARO:3001173	ACV32636.1	SHV beta-lactamase	product inactivation	carbapenem;cephalosporin;penam
ARO:3001174	ACV32637.1	SHV beta-lactamase	product inactivation	carbapenem;cephalosporin;penam
ARO:3001175	ADE58494.1	SHV beta-lactamase	product inactivation	carbapenem;cephalosporin;penam
ARO:3001176	ADE08533.1	SHV beta-lactamase	product inactivation	carbapenem;cephalosporin;penam
ARO:3001177	BAI94487.1	SHV beta-lactamase	product inactivation	carbapenem;cephalosporin;penam
ARO:3001178	ADM25824.1	SHV beta-lactamase	product inactivation	carbapenem;cephalosporin;penam
ARO:3001179	ADR66517.1	SHV beta-lactamase	product inactivation	carbapenem;cephalosporin;penam
ARO:3001181	AEI83430.1	SHV beta-lactamase	product inactivation	carbapenem;cephalosporin;penam
ARO:3001182	AEK80394.1	SHV beta-lactamase	product inactivation	carbapenem;cephalosporin;penam
ARO:3001183	AFC60795.1	SHV beta-lactamase	product inactivation	carbapenem;cephalosporin;penam
ARO:3001184	AEX99752.1	SHV beta-lactamase	product inactivation	carbapenem;cephalosporin;penam
ARO:3001185	AFN88952.1	SHV beta-lactamase	product inactivation	carbapenem;cephalosporin;penam
ARO:3001186	AFQ23953.1	SHV beta-lactamase	product inactivation	carbapenem;cephalosporin;penam
ARO:3001187	AFQ23954.1	SHV beta-lactamase	product inactivation	carbapenem;cephalosporin;penam
ARO:3001188	AFQ23955.1	SHV beta-lactamase	product inactivation	carbapenem;cephalosporin;penam
ARO:3001189	AFQ23956.1	SHV beta-lactamase	product inactivation	carbapenem;cephalosporin;penam
ARO:3001190	AFQ23957.1	SHV beta-lactamase	product inactivation	carbapenem;cephalosporin;penam
ARO:3001191	AFQ23958.1	SHV beta-lactamase	product inactivation	carbapenem;cephalosporin;penam
ARO:3001192	AFQ23959.1	SHV beta-lactamase	product inactivation	carbapenem;cephalosporin;penam
ARO:3001193	AFQ23960.1	SHV beta-lactamase	product inactivation	carbapenem;cephalosporin;penam
ARO:3001194	AFQ23961.1	SHV beta-lactamase	product inactivation	carbapenem;cephalosporin;penam
ARO:3001195	AFQ23962.1	SHV beta-lactamase	product inactivation	carbapenem;cephalosporin;penam
ARO:3001196	AFQ23963.1	SHV beta-lactamase	product inactivation	carbapenem;cephalosporin;penam
ARO:3001197	AFQ23964.1	SHV beta-lactamase	product inactivation	carbapenem;cephalosporin;penam
ARO:3001198	AFQ23965.1	SHV beta-lactamase	product inactivation	carbapenem;cephalosporin;penam
ARO:3001199	AFQ23966.1	SHV beta-lactamase	product inactivation	carbapenem;cephalosporin;penam
ARO:3001200	AFQ23967.1	SHV beta-lactamase	product inactivation	carbapenem;cephalosporin;penam
ARO:3001201	AFQ23968.1	SHV beta-lactamase	product inactivation	carbapenem;cephalosporin;penam
ARO:3001202	AFQ23969.1	SHV beta-lactamase	product inactivation	carbapenem;cephalosporin;penam
ARO:3001203	AFQ23970.1	SHV beta-lactamase	product inactivation	carbapenem;cephalosporin;penam
ARO:3001204	BAM28879.1	SHV beta-lactamase	product inactivation	carbapenem;cephalosporin;penam
ARO:3001205	AGH88989.1	Bleomycin resistant protein	product inactivation	glycopeptide antibiotic
ARO:3001209	CCC86795.1	methicillin resistant PBP2	target replacement	carbapenem;cephalosporin;cephamycin;monobactam;penam
ARO:3001214	AAC77293.1	major facilitator superfamily (MFS) antibiotic efflux pump	efflux pump	acridine dye;disinfecting agents and intercalating dyes;fluoroquinolone antibiotic;lincosamide antibiotic;nucleoside antibiotic;phenicol antibiotic
ARO:3001216	AAC74149.2	major facilitator superfamily (MFS) antibiotic efflux pump	efflux pump	fluoroquinolone antibiotic
ARO:3001265	AAC69328.1	Erm 23S ribosomal RNA methyltransferase	target alteration	lincosamide antibiotic;macrolide antibiotic;streptogramin antibiotic
ARO:3001299	AAD12162.1	non-erm 23S ribosomal RNA methyltransferase (G748)	target alteration	lincosamide antibiotic;macrolide antibiotic
ARO:3001300	BAA03674.1	non-erm 23S ribosomal RNA methyltransferase (G748)	target alteration	lincosamide antibiotic;macrolide antibiotic
ARO:3001301	AJD73064.1	non-erm 23S ribosomal RNA methyltransferase (G748)	target alteration	lincosamide antibiotic;macrolide antibiotic
ARO:3001302	AAS79458.1	non-erm 23S ribosomal RNA methyltransferase (G748)	target alteration	lincosamide antibiotic;macrolide antibiotic
ARO:3001303	CAA11706.1	Erm 23S ribosomal RNA methyltransferase	target alteration	lincosamide antibiotic;macrolide antibiotic;streptogramin antibiotic
ARO:3001304	AAA26742.1	Erm 23S ribosomal RNA methyltransferase	target alteration	lincosamide antibiotic;macrolide antibiotic;streptogramin antibiotic
ARO:3001305	CAA44667.1	Erm 23S ribosomal RNA methyltransferase	target alteration	lincosamide antibiotic;macrolide antibiotic;streptogramin antibiotic
ARO:3001306	BAA03402.1	Erm 23S ribosomal RNA methyltransferase	target alteration	lincosamide antibiotic;macrolide antibiotic;streptogramin antibiotic
ARO:3001307	AAA98349.1	streptogramin vgb lyase	product inactivation	streptogramin antibiotic
ARO:3001308	AAC61670.1	streptogramin vgb lyase	product inactivation	streptogramin antibiotic
ARO:3001313	AFK80333.1	major facilitator superfamily (MFS) antibiotic efflux pump	efflux pump	elfamycin antibiotic
ARO:3001327	AML99881.1	multidrug and toxic compound extrusion (MATE) transporter	efflux pump	fluoroquinolone antibiotic
ARO:3001328	AFH35853.1	major facilitator superfamily (MFS) antibiotic efflux pump	efflux pump	benzalkonium chloride;rhodamine;tetracycline antibiotic
ARO:3001329	ABV18113.1	major facilitator superfamily (MFS) antibiotic efflux pump	efflux pump	fosfomycin
ARO:3001336	CAQ03503.1	SHV beta-lactamase	product inactivation	carbapenem;cephalosporin;penam
ARO:3001337	CAQ03504.1	SHV beta-lactamase	product inactivation	carbapenem;cephalosporin;penam
ARO:3001338	CAQ03505.1	SHV beta-lactamase	product inactivation	carbapenem;cephalosporin;penam
ARO:3001340	AIG51284.1	SHV beta-lactamase	product inactivation	carbapenem;cephalosporin;penam
ARO:3001341	WP_063864620.1	SHV beta-lactamase	product inactivation	carbapenem;cephalosporin;penam
ARO:3001344	AFQ32277.1	SHV beta-lactamase	product inactivation	carbapenem;cephalosporin;penam
ARO:3001345	AFK93491.1	SHV beta-lactamase	product inactivation	carbapenem;cephalosporin;penam
ARO:3001346	WP_063864631.1	SHV beta-lactamase	product inactivation	carbapenem;cephalosporin;penam
ARO:3001347	CCK86744.1	SHV beta-lactamase	product inactivation	carbapenem;cephalosporin;penam
ARO:3001350	AJO16040.1	SHV beta-lactamase	product inactivation	carbapenem;cephalosporin;penam
ARO:3001351	CDN33427.1	SHV beta-lactamase	product inactivation	carbapenem;cephalosporin;penam
ARO:3001352	AFW16978.1	SHV beta-lactamase	product inactivation	carbapenem;cephalosporin;penam
ARO:3001355	WP_070984444.1	SHV beta-lactamase	product inactivation	carbapenem;cephalosporin;penam
ARO:3001356	AHA80958.1	SHV beta-lactamase	product inactivation	carbapenem;cephalosporin;penam
ARO:3001357	AHA80959.1	SHV beta-lactamase	product inactivation	carbapenem;cephalosporin;penam
ARO:3001361	AHA80963.1	SHV beta-lactamase	product inactivation	carbapenem;cephalosporin;penam
ARO:3001362	AHA80962.1	SHV beta-lactamase	product inactivation	carbapenem;cephalosporin;penam
ARO:3001364	AJO16042.1	SHV beta-lactamase	product inactivation	carbapenem;cephalosporin;penam
ARO:3001369	AGA83484.1	TEM beta-lactamase	product inactivation	cephalosporin;monobactam;penam;penem
ARO:3001373	ADP20705.1	TEM beta-lactamase	product inactivation	cephalosporin;monobactam;penam;penem
ARO:3001374	AEG64812.1	TEM beta-lactamase	product inactivation	cephalosporin;monobactam;penam;penem
ARO:3001375	CCA61905.1	TEM beta-lactamase	product inactivation	cephalosporin;monobactam;penam;penem
ARO:3001376	AFE48832.1	TEM beta-lactamase	product inactivation	cephalosporin;monobactam;penam;penem
ARO:3001378	AFS44742.1	TEM beta-lactamase	product inactivation	cephalosporin;monobactam;penam;penem
ARO:3001382	AGZ20205.1	TEM beta-lactamase	product inactivation	cephalosporin;monobactam;penam;penem
ARO:3001383	AGK82336.1	TEM beta-lactamase	product inactivation	cephalosporin;monobactam;penam;penem
ARO:3001384	AGK40892.1	TEM beta-lactamase	product inactivation	cephalosporin;monobactam;penam;penem
ARO:3001385	AGL39384.1	TEM beta-lactamase	product inactivation	cephalosporin;monobactam;penam;penem
ARO:3001386	AGW25367.1	TEM beta-lactamase	product inactivation	cephalosporin;monobactam;penam;penem
ARO:3001387	WP_032072208.1	TEM beta-lactamase	product inactivation	cephalosporin;monobactam;penam;penem
ARO:3001388	AHA80960.1	TEM beta-lactamase	product inactivation	cephalosporin;monobactam;penam;penem
ARO:3001389	WP_063864901.1	TEM beta-lactamase	product inactivation	cephalosporin;monobactam;penam;penem
ARO:3001390	AHA58207.1	TEM beta-lactamase	product inactivation	cephalosporin;monobactam;penam;penem
ARO:3001391	AJO16044.1	TEM beta-lactamase	product inactivation	cephalosporin;monobactam;penam;penem
ARO:3001392	AJO16045.1	TEM beta-lactamase	product inactivation	cephalosporin;monobactam;penam;penem
ARO:3001393	AHJ78622.1	TEM beta-lactamase	product inactivation	cephalosporin;monobactam;penam;penem
ARO:3001394	CDN33426.1	TEM beta-lactamase	product inactivation	cephalosporin;monobactam;penam;penem
ARO:3001396	AFB82783.1	OXA beta-lactamase	product inactivation	carbapenem;cephalosporin;penam
ARO:3001397	AAB59082.1	OXA beta-lactamase	product inactivation	carbapenem;cephalosporin;penam
ARO:3001398	AAC41449.1	OXA beta-lactamase	product inactivation	carbapenem;cephalosporin;penam
ARO:3001399	AET05998.1	OXA beta-lactamase	product inactivation	carbapenem;cephalosporin;penam
ARO:3001400	CAA41211.1	OXA beta-lactamase	product inactivation	carbapenem;cephalosporin;penam
ARO:3001402	CAA53242.1	OXA beta-lactamase	product inactivation	carbapenem;cephalosporin;penam
ARO:3001404	AAA98406.1	OXA beta-lactamase	product inactivation	carbapenem;cephalosporin;penam
ARO:3001405	AAG45720.1	OXA beta-lactamase	product inactivation	carbapenem;cephalosporin;penam
ARO:3001406	CAA80304.1	OXA beta-lactamase	product inactivation	carbapenem;cephalosporin;penam
ARO:3001407	AAA83417.1	OXA beta-lactamase	product inactivation	carbapenem;cephalosporin;penam
ARO:3001408	AAC46344.1	OXA beta-lactamase	product inactivation	carbapenem;cephalosporin;penam
ARO:3001409	AHX74209.1	OXA beta-lactamase	product inactivation	carbapenem;cephalosporin;penam
ARO:3001410	AAB05874.1	OXA beta-lactamase	product inactivation	carbapenem;cephalosporin;penam
ARO:3001411	AAB97924.1	OXA beta-lactamase	product inactivation	carbapenem;cephalosporin;penam
ARO:3001412	ABI63579.1	OXA beta-lactamase	product inactivation	carbapenem;cephalosporin;penam
ARO:3001413	AAB58555.1	OXA beta-lactamase	product inactivation	carbapenem;cephalosporin;penam
ARO:3001414	AAD02245.1	OXA beta-lactamase	product inactivation	carbapenem;cephalosporin;penam
ARO:3001415	ACC55538.1	OXA beta-lactamase	product inactivation	carbapenem;cephalosporin;penam
ARO:3001416	CAA71699.2	OXA beta-lactamase	product inactivation	carbapenem;cephalosporin;penam
ARO:3001417	AAD12233.1	OXA beta-lactamase	product inactivation	carbapenem;cephalosporin;penam
ARO:3001418	AAV65289.1	OXA beta-lactamase	product inactivation	carbapenem;cephalosporin;penam
ARO:3001419	AAM34291.1	OXA beta-lactamase	product inactivation	carbapenem;cephalosporin;monobactam;penam
ARO:3001420	AAG35607.1	OXA beta-lactamase	product inactivation	carbapenem;cephalosporin;penam
ARO:3001421	AAG35608.1	OXA beta-lactamase	product inactivation	carbapenem;cephalosporin;penam
ARO:3001422	AAG35609.2	OXA beta-lactamase	product inactivation	carbapenem;cephalosporin;penam
ARO:3001423	AAF72942.1	OXA beta-lactamase	product inactivation	carbapenem;cephalosporin;penam
ARO:3001424	CAC35728.1	OXA beta-lactamase	product inactivation	carbapenem;cephalosporin;penam
ARO:3001425	AAK52604.1	OXA beta-lactamase	product inactivation	carbapenem;cephalosporin;penam
ARO:3001426	AAK58418.1	OXA beta-lactamase	product inactivation	carbapenem;cephalosporin;penam
ARO:3001427	AAG23871.1	OXA beta-lactamase	product inactivation	carbapenem;cephalosporin;penam
ARO:3001428	AAK15582.1	OXA beta-lactamase	product inactivation	carbapenem;cephalosporin;penam
ARO:3001429	AAK49460.1	OXA beta-lactamase	product inactivation	carbapenem;cephalosporin;penam
ARO:3001430	AAG24866.1	OXA beta-lactamase	product inactivation	carbapenem;cephalosporin;penam
ARO:3001431	AAG33665.1	OXA beta-lactamase	product inactivation	carbapenem;cephalosporin;penam
ARO:3001437	ABF50983.1	OXA beta-lactamase	product inactivation	carbapenem;cephalosporin;penam
ARO:3001438	CAJ77817.2	OXA beta-lactamase	product inactivation	carbapenem;cephalosporin;penam
ARO:3001439	CAL85435.1	OXA beta-lactamase	product inactivation	carbapenem;cephalosporin;penam
ARO:3001440	ABS71123.1	OXA beta-lactamase	product inactivation	carbapenem;cephalosporin;penam
ARO:3001441	ABW95047.1	OXA beta-lactamase	product inactivation	carbapenem;cephalosporin;penam
ARO:3001442	ACV49885.1	OXA beta-lactamase	product inactivation	carbapenem;cephalosporin;penam
ARO:3001443	AGU69248.1	OXA beta-lactamase	product inactivation	carbapenem;cephalosporin;penam
ARO:3001444	ABX45061.1	OXA beta-lactamase	product inactivation	carbapenem;cephalosporin;penam
ARO:3001445	ABX45062.1	OXA beta-lactamase	product inactivation	carbapenem;cephalosporin;penam
ARO:3001446	ABX45063.1	OXA beta-lactamase	product inactivation	carbapenem;cephalosporin;penam
ARO:3001447	ABX45064.1	OXA beta-lactamase	product inactivation	carbapenem;cephalosporin;penam
ARO:3001448	ABX45065.1	OXA beta-lactamase	product inactivation	carbapenem;cephalosporin;penam
ARO:3001449	ABX45066.1	OXA beta-lactamase	product inactivation	carbapenem;cephalosporin;penam
ARO:3001451	CAQ51348.1	OXA beta-lactamase	product inactivation	carbapenem;cephalosporin;penam
ARO:3001452	ALL27283.1	OXA beta-lactamase	product inactivation	carbapenem;cephalosporin;penam
ARO:3001453	ACX31140.1	OXA beta-lactamase	product inactivation	carbapenem;cephalosporin;penam
ARO:3001454	ACX31141.1	OXA beta-lactamase	product inactivation	carbapenem;cephalosporin;penam
ARO:3001455	ACX31142.1	OXA beta-lactamase	product inactivation	carbapenem;cephalosporin;penam
ARO:3001456	SUA76968.1	OXA beta-lactamase	product inactivation	carbapenem;cephalosporin;penam
ARO:3001457	ALA99186.1	OXA beta-lactamase	product inactivation	carbapenem;cephalosporin;penam
ARO:3001458	CFB60580.1	OXA beta-lactamase	product inactivation	carbapenem;cephalosporin;penam
ARO:3001459	SNU87672.1	OXA beta-lactamase	product inactivation	carbapenem;cephalosporin;penam
ARO:3001460	ALA99189.1	OXA beta-lactamase	product inactivation	carbapenem;cephalosporin;penam
ARO:3001461	SUA92210.1	OXA beta-lactamase	product inactivation	carbapenem;cephalosporin;penam
ARO:3001462	ALA99191.1	OXA beta-lactamase	product inactivation	carbapenem;cephalosporin;penam
ARO:3001463	ALA99192.1	OXA beta-lactamase	product inactivation	carbapenem;cephalosporin;penam
ARO:3001464	WP_063861087.1	OXA beta-lactamase	product inactivation	carbapenem;cephalosporin;penam
ARO:3001465	ADK35869.1	OXA beta-lactamase	product inactivation	carbapenem;cephalosporin;penam
ARO:3001466	ADK35870.1	OXA beta-lactamase	product inactivation	carbapenem;cephalosporin;penam
ARO:3001467	ADK35871.1	OXA beta-lactamase	product inactivation	carbapenem;cephalosporin;penam
ARO:3001468	ADK35872.1	OXA beta-lactamase	product inactivation	carbapenem;cephalosporin;penam
ARO:3001469	ADK35873.1	OXA beta-lactamase	product inactivation	carbapenem;cephalosporin;penam
ARO:3001470	ADK35874.1	OXA beta-lactamase	product inactivation	carbapenem;cephalosporin;penam
ARO:3001471	ADK35875.1	OXA beta-lactamase	product inactivation	carbapenem;cephalosporin;penam
ARO:3001472	ADI58622.1	OXA beta-lactamase	product inactivation	carbapenem;cephalosporin;penam
ARO:3001473	ADM26744.1	OXA beta-lactamase	product inactivation	carbapenem;cephalosporin;penam
ARO:3001474	ADM26745.1	OXA beta-lactamase	product inactivation	carbapenem;cephalosporin;penam
ARO:3001475	ADV41666.1	OXA beta-lactamase	product inactivation	carbapenem;cephalosporin;penam
ARO:3001476	AFO09968.1	OXA beta-lactamase	product inactivation	carbapenem;cephalosporin;penam
ARO:3001477	AFO09969.1	OXA beta-lactamase	product inactivation	carbapenem;cephalosporin;penam
ARO:3001478	WP_002783228.1	OXA beta-lactamase	product inactivation	carbapenem;cephalosporin;penam
ARO:3001479	AEB98920.1	OXA beta-lactamase	product inactivation	carbapenem;cephalosporin;penam
ARO:3001480	AEB98921.1	OXA beta-lactamase	product inactivation	carbapenem;cephalosporin;penam
ARO:3001481	AEB98922.1	OXA beta-lactamase	product inactivation	carbapenem;cephalosporin;penam
ARO:3001482	AEB98923.1	OXA beta-lactamase	product inactivation	carbapenem;cephalosporin;penam
ARO:3001483	AEO92079.1	OXA beta-lactamase	product inactivation	carbapenem;cephalosporin;penam
ARO:3001484	BAL15076.1	OXA beta-lactamase	product inactivation	carbapenem;cephalosporin;penam
ARO:3001485	AFK28473.1	OXA beta-lactamase	product inactivation	carbapenem;cephalosporin;penam
ARO:3001486	CCA94644.1	OXA beta-lactamase	product inactivation	carbapenem;cephalosporin;penam
ARO:3001487	AEE61368.1	OXA beta-lactamase	product inactivation	carbapenem;cephalosporin;penam
ARO:3001488	CCA94649.1	OXA beta-lactamase	product inactivation	carbapenem;cephalosporin;penam
ARO:3001489	AEO44980.1	OXA beta-lactamase	product inactivation	carbapenem;cephalosporin;penam
ARO:3001493	AEP43731.1	OXA beta-lactamase	product inactivation	carbapenem;cephalosporin;penam
ARO:3001495	AID67109.1	OXA beta-lactamase	product inactivation	carbapenem;cephalosporin;penam
ARO:3001496	WP_038350216.1	OXA beta-lactamase	product inactivation	carbapenem;cephalosporin;penam
ARO:3001498	AFN65709.1	OXA beta-lactamase	product inactivation	carbapenem;cephalosporin;penam
ARO:3001499	AFN20670.1	OXA beta-lactamase	product inactivation	carbapenem;cephalosporin;penam
ARO:3001500	AER57903.1	OXA beta-lactamase	product inactivation	carbapenem;cephalosporin;penam
ARO:3001501	ASF15667.1	OXA beta-lactamase	product inactivation	carbapenem;cephalosporin;penam
ARO:3001502	CCE94500.1	OXA beta-lactamase	product inactivation	carbapenem;cephalosporin;penam
ARO:3001503	CCE73593.2	OXA beta-lactamase	product inactivation	carbapenem;cephalosporin;penam
ARO:3001504	CCW28916.1	OXA beta-lactamase	product inactivation	carbapenem;cephalosporin;penam
ARO:3001510	AGW16404.1	OXA beta-lactamase	product inactivation	carbapenem;cephalosporin;penam
ARO:3001511	AGW16405.1	OXA beta-lactamase	product inactivation	carbapenem;cephalosporin;penam
ARO:3001512	AGW16406.1	OXA beta-lactamase	product inactivation	carbapenem;cephalosporin;penam
ARO:3001513	AGW16407.1	OXA beta-lactamase	product inactivation	carbapenem;cephalosporin;penam
ARO:3001514	AGW16408.1	OXA beta-lactamase	product inactivation	carbapenem;cephalosporin;penam
ARO:3001515	AGW16409.1	OXA beta-lactamase	product inactivation	carbapenem;cephalosporin;penam
ARO:3001516	AGW16410.1	OXA beta-lactamase	product inactivation	carbapenem;cephalosporin;penam
ARO:3001517	AGW16411.1	OXA beta-lactamase	product inactivation	carbapenem;cephalosporin;penam
ARO:3001518	AGW16412.1	OXA beta-lactamase	product inactivation	carbapenem;cephalosporin;penam
ARO:3001519	AGW16413.1	OXA beta-lactamase	product inactivation	carbapenem;cephalosporin;penam
ARO:3001520	AGW16414.1	OXA beta-lactamase	product inactivation	carbapenem;cephalosporin;penam
ARO:3001521	AGW16415.1	OXA beta-lactamase	product inactivation	carbapenem;cephalosporin;penam
ARO:3001522	AGW16416.1	OXA beta-lactamase	product inactivation	carbapenem;cephalosporin;penam
ARO:3001523	AGW16417.1	OXA beta-lactamase	product inactivation	carbapenem;cephalosporin;penam
ARO:3001524	AHN07452.1	OXA beta-lactamase	product inactivation	carbapenem;cephalosporin;penam
ARO:3001525	RIL13772.1	OXA beta-lactamase	product inactivation	carbapenem;cephalosporin;penam
ARO:3001526	AHN07454.1	OXA beta-lactamase	product inactivation	carbapenem;cephalosporin;penam
ARO:3001527	AHN07456.1	OXA beta-lactamase	product inactivation	carbapenem;cephalosporin;penam
ARO:3001528	OTK94966.1	OXA beta-lactamase	product inactivation	carbapenem;cephalosporin;penam
ARO:3001529	AHN07458.1	OXA beta-lactamase	product inactivation	carbapenem;cephalosporin;penam
ARO:3001530	AHN07460.1	OXA beta-lactamase	product inactivation	carbapenem;cephalosporin;penam
ARO:3001531	PCE45447.1	OXA beta-lactamase	product inactivation	carbapenem;cephalosporin;penam
ARO:3001532	AHN07462.1	OXA beta-lactamase	product inactivation	carbapenem;cephalosporin;penam
ARO:3001533	AHN07463.1	OXA beta-lactamase	product inactivation	carbapenem;cephalosporin;penam
ARO:3001534	AHN07464.1	OXA beta-lactamase	product inactivation	carbapenem;cephalosporin;penam
ARO:3001535	AGW83446.1	OXA beta-lactamase	product inactivation	carbapenem;cephalosporin;penam
ARO:3001536	AGW83447.1	OXA beta-lactamase	product inactivation	carbapenem;cephalosporin;penam
ARO:3001537	AGW83448.1	OXA beta-lactamase	product inactivation	carbapenem;cephalosporin;penam
ARO:3001538	AGW83449.1	OXA beta-lactamase	product inactivation	carbapenem;cephalosporin;penam
ARO:3001539	AGW83450.1	OXA beta-lactamase	product inactivation	carbapenem;cephalosporin;penam
ARO:3001540	AGW83451.1	OXA beta-lactamase	product inactivation	carbapenem;cephalosporin;penam
ARO:3001541	AGW83452.1	OXA beta-lactamase	product inactivation	carbapenem;cephalosporin;penam
ARO:3001542	AGW83453.1	OXA beta-lactamase	product inactivation	carbapenem;cephalosporin;penam
ARO:3001543	AGW83454.1	OXA beta-lactamase	product inactivation	carbapenem;cephalosporin;penam
ARO:3001544	AGZ83153.1	OXA beta-lactamase	product inactivation	carbapenem;cephalosporin;penam
ARO:3001545	AGZ83154.1	OXA beta-lactamase	product inactivation	carbapenem;cephalosporin;penam
ARO:3001546	AGZ83155.1	OXA beta-lactamase	product inactivation	carbapenem;cephalosporin;penam
ARO:3001547	AGZ83156.1	OXA beta-lactamase	product inactivation	carbapenem;cephalosporin;penam
ARO:3001548	AHA11124.1	OXA beta-lactamase	product inactivation	carbapenem;cephalosporin;penam
ARO:3001549	AHA11125.1	OXA beta-lactamase	product inactivation	carbapenem;cephalosporin;penam
ARO:3001550	AHA11126.1	OXA beta-lactamase	product inactivation	carbapenem;cephalosporin;penam
ARO:3001551	AFR53898.2	OXA beta-lactamase	product inactivation	carbapenem;cephalosporin;penam
ARO:3001552	AHI63011.1	OXA beta-lactamase	product inactivation	carbapenem;cephalosporin;penam
ARO:3001553	AJO16038.1	OXA beta-lactamase	product inactivation	carbapenem;cephalosporin;penam
ARO:3001555	AMB19637.1	OXA beta-lactamase	product inactivation	carbapenem;cephalosporin;penam
ARO:3001557	BAO09635.1	OXA beta-lactamase	product inactivation	carbapenem;cephalosporin;penam
ARO:3001558	AIG22448.1	OXA beta-lactamase	product inactivation	carbapenem;cephalosporin;penam
ARO:3001559	CDM87362.1	OXA beta-lactamase	product inactivation	carbapenem;cephalosporin;penam
ARO:3001560	AHL30274.1	OXA beta-lactamase	product inactivation	carbapenem;cephalosporin;penam
ARO:3001561	AHL30275.1	OXA beta-lactamase	product inactivation	carbapenem;cephalosporin;penam
ARO:3001562	AHL30276.1	OXA beta-lactamase	product inactivation	carbapenem;cephalosporin;penam
ARO:3001563	AHL30277.1	OXA beta-lactamase	product inactivation	carbapenem;cephalosporin;penam
ARO:3001564	AHL30278.1	OXA beta-lactamase	product inactivation	carbapenem;cephalosporin;penam
ARO:3001565	AHL30279.1	OXA beta-lactamase	product inactivation	carbapenem;cephalosporin;penam
ARO:3001566	AHL30280.1	OXA beta-lactamase	product inactivation	carbapenem;cephalosporin;penam
ARO:3001567	AHL30285.1	OXA beta-lactamase	product inactivation	carbapenem;cephalosporin;penam
ARO:3001568	AHL30286.1	OXA beta-lactamase	product inactivation	carbapenem;cephalosporin;penam
ARO:3001569	AHL30281.1	OXA beta-lactamase	product inactivation	carbapenem;cephalosporin;penam
ARO:3001570	AHL30282.1	OXA beta-lactamase	product inactivation	carbapenem;cephalosporin;penam
ARO:3001571	AHL30272.1	OXA beta-lactamase	product inactivation	carbapenem;cephalosporin;penam
ARO:3001572	AHL30273.1	OXA beta-lactamase	product inactivation	carbapenem;cephalosporin;penam
ARO:3001573	AHK51384.1	OXA beta-lactamase	product inactivation	carbapenem;cephalosporin;penam
ARO:3001574	AHL30284.1	OXA beta-lactamase	product inactivation	carbapenem;cephalosporin;penam
ARO:3001575	AHL30287.1	OXA beta-lactamase	product inactivation	carbapenem;cephalosporin;penam
ARO:3001576	AHL30283.1	OXA beta-lactamase	product inactivation	carbapenem;cephalosporin;penam
ARO:3001577	AHN53381.1	OXA beta-lactamase	product inactivation	carbapenem;cephalosporin;penam
ARO:3001578	AAN41430.1	OXA beta-lactamase	product inactivation	carbapenem;cephalosporin;penam
ARO:3001581	WP_015649877.1	OXA beta-lactamase	product inactivation	carbapenem;cephalosporin;penam
ARO:3001582	WP_016852290.1	OXA beta-lactamase	product inactivation	carbapenem;cephalosporin;penam
ARO:3001583	AIT76118.1	OXA beta-lactamase	product inactivation	carbapenem;cephalosporin;penam
ARO:3001584	AIT76095.1	OXA beta-lactamase	product inactivation	carbapenem;cephalosporin;penam
ARO:3001586	AIS39036.1	OXA beta-lactamase	product inactivation	carbapenem;cephalosporin;penam
ARO:3001587	AIS39034.1	OXA beta-lactamase	product inactivation	carbapenem;cephalosporin;penam
ARO:3001588	AIS39035.1	OXA beta-lactamase	product inactivation	carbapenem;cephalosporin;penam
ARO:3001589	AIM47095.1	OXA beta-lactamase	product inactivation	carbapenem;cephalosporin;penam
ARO:3001595	AIM47096.1	OXA beta-lactamase	product inactivation	carbapenem;cephalosporin;penam
ARO:3001596	AJA30430.1	OXA beta-lactamase	product inactivation	carbapenem;cephalosporin;penam
ARO:3001597	AJD07402.1	OXA beta-lactamase	product inactivation	carbapenem;cephalosporin;penam
ARO:3001598	AJD07403.1	OXA beta-lactamase	product inactivation	carbapenem;cephalosporin;penam
ARO:3001599	AJD07404.1	OXA beta-lactamase	product inactivation	carbapenem;cephalosporin;penam
ARO:3001600	AJD07405.1	OXA beta-lactamase	product inactivation	carbapenem;cephalosporin;penam
ARO:3001602	AJD07406.1	OXA beta-lactamase	product inactivation	carbapenem;cephalosporin;penam
ARO:3001603	AJD07407.1	OXA beta-lactamase	product inactivation	carbapenem;cephalosporin;penam
ARO:3001604	AJD07408.1	OXA beta-lactamase	product inactivation	carbapenem;cephalosporin;penam
ARO:3001605	AJD07401.1	OXA beta-lactamase	product inactivation	carbapenem;cephalosporin;penam
ARO:3001606	AIG94927.1	OXA beta-lactamase	product inactivation	carbapenem;cephalosporin;penam
ARO:3001607	AKH90740.1	OXA beta-lactamase	product inactivation	carbapenem;cephalosporin;penam
ARO:3001608	AIU44173.1	OXA beta-lactamase	product inactivation	carbapenem;cephalosporin;penam
ARO:3001609	ABX38721.1	OXA beta-lactamase	product inactivation	carbapenem;cephalosporin;penam
ARO:3001610	AFQ90085.1	OXA beta-lactamase	product inactivation	carbapenem;cephalosporin;penam
ARO:3001611	ACC58995.1	OXA beta-lactamase	product inactivation	carbapenem;cephalosporin;penam
ARO:3001612	CAC83905.2	OXA beta-lactamase	product inactivation	carbapenem;cephalosporin;monobactam;penam
ARO:3001613	AAW81336.1	OXA beta-lactamase	product inactivation	carbapenem;cephalosporin;penam
ARO:3001614	AAW81337.1	OXA beta-lactamase	product inactivation	carbapenem;cephalosporin;penam
ARO:3001615	ABK34774.1	OXA beta-lactamase	product inactivation	carbapenem;cephalosporin;penam
ARO:3001616	AAW81339.1	OXA beta-lactamase	product inactivation	carbapenem;cephalosporin;penam
ARO:3001617	CAM86994.1	OXA beta-lactamase	product inactivation	carbapenem;cephalosporin;penam
ARO:3001618	AAW81341.1	OXA beta-lactamase	product inactivation	carbapenem;cephalosporin;penam
ARO:3001619	AAW81342.1	OXA beta-lactamase	product inactivation	carbapenem;cephalosporin;penam
ARO:3001620	CAP01453.1	OXA beta-lactamase	product inactivation	carbapenem;cephalosporin;penam
ARO:3001621	AAX51234.1	OXA beta-lactamase	product inactivation	carbapenem;cephalosporin;penam
ARO:3001622	AAX51233.1	OXA beta-lactamase	product inactivation	carbapenem;cephalosporin;penam
ARO:3001623	ABC26007.1	OXA beta-lactamase	product inactivation	carbapenem;cephalosporin;penam
ARO:3001624	ABC26006.1	OXA beta-lactamase	product inactivation	carbapenem;cephalosporin;penam
ARO:3001625	ABE03012.1	OXA beta-lactamase	product inactivation	carbapenem;cephalosporin;penam
ARO:3001626	ABD48715.1	OXA beta-lactamase	product inactivation	carbapenem;cephalosporin;penam
ARO:3001627	ABF47914.1	OXA beta-lactamase	product inactivation	carbapenem;cephalosporin;penam
ARO:3001628	ABF47916.1	OXA beta-lactamase	product inactivation	carbapenem;cephalosporin;penam
ARO:3001629	ABF47917.1	OXA beta-lactamase	product inactivation	carbapenem;cephalosporin;penam
ARO:3001630	ABF47918.1	OXA beta-lactamase	product inactivation	carbapenem;cephalosporin;penam
ARO:3001631	ABF47919.1	OXA beta-lactamase	product inactivation	carbapenem;cephalosporin;penam
ARO:3001632	ABC61637.1	OXA beta-lactamase	product inactivation	carbapenem;cephalosporin;penam
ARO:3001633	ABV71246.1	OXA beta-lactamase	product inactivation	carbapenem;cephalosporin;penam
ARO:3001634	ABV71247.1	OXA beta-lactamase	product inactivation	carbapenem;cephalosporin;penam
ARO:3001635	ABV71248.1	OXA beta-lactamase	product inactivation	carbapenem;cephalosporin;penam
ARO:3001636	ABQ52429.1	OXA beta-lactamase	product inactivation	carbapenem;cephalosporin;penam
ARO:3001637	ABV31686.1	OXA beta-lactamase	product inactivation	carbapenem;cephalosporin;penam
ARO:3001638	ABV31687.1	OXA beta-lactamase	product inactivation	carbapenem;cephalosporin;penam
ARO:3001639	ABV31688.1	OXA beta-lactamase	product inactivation	carbapenem;cephalosporin;penam
ARO:3001640	ABV31689.1	OXA beta-lactamase	product inactivation	carbapenem;cephalosporin;penam
ARO:3001641	ABV31690.1	OXA beta-lactamase	product inactivation	carbapenem;cephalosporin;penam
ARO:3001642	ABV31691.1	OXA beta-lactamase	product inactivation	carbapenem;cephalosporin;penam
ARO:3001643	ABV31692.1	OXA beta-lactamase	product inactivation	carbapenem;cephalosporin;penam
ARO:3001644	ABW70410.1	OXA beta-lactamase	product inactivation	carbapenem;cephalosporin;penam
ARO:3001645	AAW81358.1	OXA beta-lactamase	product inactivation	carbapenem;cephalosporin;penam
ARO:3001646	CAK50801.1	OXA beta-lactamase	product inactivation	carbapenem;cephalosporin;penam
ARO:3001647	ABO33299.1	OXA beta-lactamase	product inactivation	carbapenem;cephalosporin;penam
ARO:3001648	ABY77907.1	OXA beta-lactamase	product inactivation	carbapenem;cephalosporin;penam
ARO:3001649	ABI53716.1	OXA beta-lactamase	product inactivation	carbapenem;cephalosporin;penam
ARO:3001650	CAJ77809.1	OXA beta-lactamase	product inactivation	carbapenem;cephalosporin;penam
ARO:3001651	ACD84988.1	OXA beta-lactamase	product inactivation	carbapenem;cephalosporin;penam
ARO:3001652	ACD84989.1	OXA beta-lactamase	product inactivation	carbapenem;cephalosporin;penam
ARO:3001653	ACD84990.1	OXA beta-lactamase	product inactivation	carbapenem;cephalosporin;penam
ARO:3001654	ACX70402.1	OXA beta-lactamase	product inactivation	carbapenem;cephalosporin;penam
ARO:3001655	ACD45467.1	OXA beta-lactamase	product inactivation	carbapenem;cephalosporin;penam
ARO:3001656	ADI58616.1	OXA beta-lactamase	product inactivation	carbapenem;cephalosporin;penam
ARO:3001657	ADI58617.1	OXA beta-lactamase	product inactivation	carbapenem;cephalosporin;penam
ARO:3001658	ADI58618.1	OXA beta-lactamase	product inactivation	carbapenem;cephalosporin;penam
ARO:3001659	ADI58619.1	OXA beta-lactamase	product inactivation	carbapenem;cephalosporin;penam
ARO:3001660	ADI58620.1	OXA beta-lactamase	product inactivation	carbapenem;cephalosporin;penam
ARO:3001661	ADI58621.1	OXA beta-lactamase	product inactivation	carbapenem;cephalosporin;penam
ARO:3001662	ADK34116.1	OXA beta-lactamase	product inactivation	carbapenem;cephalosporin;penam
ARO:3001663	ADB28891.1	OXA beta-lactamase	product inactivation	carbapenem;cephalosporin;penam
ARO:3001664	ADX07748.1	OXA beta-lactamase	product inactivation	carbapenem;cephalosporin;penam
ARO:3001665	ADX07745.1	OXA beta-lactamase	product inactivation	carbapenem;cephalosporin;penam
ARO:3001666	ADX07746.1	OXA beta-lactamase	product inactivation	carbapenem;cephalosporin;penam
ARO:3001667	ADX07747.1	OXA beta-lactamase	product inactivation	carbapenem;cephalosporin;penam
ARO:3001668	AEL17179.1	OXA beta-lactamase	product inactivation	carbapenem;cephalosporin;penam
ARO:3001669	AEL88491.1	OXA beta-lactamase	product inactivation	carbapenem;cephalosporin;penam
ARO:3001670	AFG29918.1	OXA beta-lactamase	product inactivation	carbapenem;cephalosporin;penam
ARO:3001671	AAP40270.1	OXA beta-lactamase	product inactivation	carbapenem;cephalosporin;penam
ARO:3001672	CCJ32595.1	OXA beta-lactamase	product inactivation	carbapenem;cephalosporin;penam
ARO:3001673	CCJ32596.1	OXA beta-lactamase	product inactivation	carbapenem;cephalosporin;penam
ARO:3001674	CCJ32597.1	OXA beta-lactamase	product inactivation	carbapenem;cephalosporin;penam
ARO:3001675	CCJ32598.1	OXA beta-lactamase	product inactivation	carbapenem;cephalosporin;penam
ARO:3001676	AFH36330.1	OXA beta-lactamase	product inactivation	carbapenem;cephalosporin;penam
ARO:3001677	AFH36332.1	OXA beta-lactamase	product inactivation	carbapenem;cephalosporin;penam
ARO:3001678	AFH36331.1	OXA beta-lactamase	product inactivation	carbapenem;cephalosporin;penam
ARO:3001679	AFO55201.1	OXA beta-lactamase	product inactivation	carbapenem;cephalosporin;penam
ARO:3001680	AFO55202.1	OXA beta-lactamase	product inactivation	carbapenem;cephalosporin;penam
ARO:3001681	AGI65307.1	OXA beta-lactamase	product inactivation	carbapenem;cephalosporin;penam
ARO:3001682	BAN10684.1	OXA beta-lactamase	product inactivation	carbapenem;cephalosporin;penam
ARO:3001683	AGU69250.1	OXA beta-lactamase	product inactivation	carbapenem;cephalosporin;penam
ARO:3001684	AGU69251.1	OXA beta-lactamase	product inactivation	carbapenem;cephalosporin;penam
ARO:3001685	AGU69252.1	OXA beta-lactamase	product inactivation	carbapenem;cephalosporin;penam
ARO:3001686	AGU69253.1	OXA beta-lactamase	product inactivation	carbapenem;cephalosporin;penam
ARO:3001687	AGU69254.1	OXA beta-lactamase	product inactivation	carbapenem;cephalosporin;penam
ARO:3001688	AGU69255.1	OXA beta-lactamase	product inactivation	carbapenem;cephalosporin;penam
ARO:3001689	AGK07368.1	OXA beta-lactamase	product inactivation	carbapenem;cephalosporin;penam
ARO:3001690	AGK07369.1	OXA beta-lactamase	product inactivation	carbapenem;cephalosporin;penam
ARO:3001691	AFM55001.1	OXA beta-lactamase	product inactivation	carbapenem;cephalosporin;penam
ARO:3001692	AFM55000.1	OXA beta-lactamase	product inactivation	carbapenem;cephalosporin;penam
ARO:3001693	AFM55002.1	OXA beta-lactamase	product inactivation	carbapenem;cephalosporin;penam
ARO:3001694	AGK07370.1	OXA beta-lactamase	product inactivation	carbapenem;cephalosporin;penam
ARO:3001695	ADM47435.1	OXA beta-lactamase	product inactivation	carbapenem;cephalosporin;penam
ARO:3001702	ACE63186.1	OXA beta-lactamase	product inactivation	carbapenem;cephalosporin;penam
ARO:3001703	AAZ78361.1	OXA beta-lactamase	product inactivation	carbapenem;cephalosporin;penam
ARO:3001704	ABC84263.1	OXA beta-lactamase	product inactivation	carbapenem;cephalosporin;penam
ARO:3001705	ADB28892.1	OXA beta-lactamase	product inactivation	carbapenem;cephalosporin;penam
ARO:3001707	ENV88740.1	OXA beta-lactamase	product inactivation	carbapenem;cephalosporin;penam
ARO:3001709	ADK92148.1	OXA beta-lactamase	product inactivation	carbapenem;cephalosporin;penam
ARO:3001710	AEV91550.1	OXA beta-lactamase	product inactivation	carbapenem;cephalosporin;penam
ARO:3001711	AEV91551.1	OXA beta-lactamase	product inactivation	carbapenem;cephalosporin;penam
ARO:3001712	AEV91552.1	OXA beta-lactamase	product inactivation	carbapenem;cephalosporin;penam
ARO:3001713	AEV91553.1	OXA beta-lactamase	product inactivation	carbapenem;cephalosporin;penam
ARO:3001714	AEV91554.1	OXA beta-lactamase	product inactivation	carbapenem;cephalosporin;penam
ARO:3001715	AGV04655.1	OXA beta-lactamase	product inactivation	carbapenem;cephalosporin;penam
ARO:3001716	ENU54757.1	OXA beta-lactamase	product inactivation	carbapenem;cephalosporin;penam
ARO:3001717	ENW35072.1	OXA beta-lactamase	product inactivation	carbapenem;cephalosporin;penam
ARO:3001718	ENW50687.1	OXA beta-lactamase	product inactivation	carbapenem;cephalosporin;penam
ARO:3001719	ENW43915.1	OXA beta-lactamase	product inactivation	carbapenem;cephalosporin;penam
ARO:3001720	ENW20318.1	OXA beta-lactamase	product inactivation	carbapenem;cephalosporin;penam
ARO:3001721	RFX69805.1	OXA beta-lactamase	product inactivation	carbapenem;cephalosporin;penam
ARO:3001722	ENV38192.1	OXA beta-lactamase	product inactivation	carbapenem;cephalosporin;penam
ARO:3001723	ENV93423.1	OXA beta-lactamase	product inactivation	carbapenem;cephalosporin;penam
ARO:3001724	ENU09033.1	OXA beta-lactamase	product inactivation	carbapenem;cephalosporin;penam
ARO:3001725	EOQ63861.1	OXA beta-lactamase	product inactivation	carbapenem;cephalosporin;penam
ARO:3001726	EOQ69512.1	OXA beta-lactamase	product inactivation	carbapenem;cephalosporin;penam
ARO:3001727	EOQ72432.1	OXA beta-lactamase	product inactivation	carbapenem;cephalosporin;penam
ARO:3001728	ENW16915.1	OXA beta-lactamase	product inactivation	carbapenem;cephalosporin;penam
ARO:3001729	ENW12288.1	OXA beta-lactamase	product inactivation	carbapenem;cephalosporin;penam
ARO:3001730	EPH38243.1	OXA beta-lactamase	product inactivation	carbapenem;cephalosporin;penam
ARO:3001731	ENV18923.1	OXA beta-lactamase	product inactivation	carbapenem;cephalosporin;penam
ARO:3001732	ENV13583.1	OXA beta-lactamase	product inactivation	carbapenem;cephalosporin;penam
ARO:3001733	ENV45890.1	OXA beta-lactamase	product inactivation	carbapenem;cephalosporin;penam
ARO:3001734	ENU35234.1	OXA beta-lactamase	product inactivation	carbapenem;cephalosporin;penam
ARO:3001735	ENV74419.1	OXA beta-lactamase	product inactivation	carbapenem;cephalosporin;penam
ARO:3001736	ENU38533.1	OXA beta-lactamase	product inactivation	carbapenem;cephalosporin;penam
ARO:3001737	EKE23052.1	OXA beta-lactamase	product inactivation	carbapenem;cephalosporin;penam
ARO:3001738	ENU15301.1	OXA beta-lactamase	product inactivation	carbapenem;cephalosporin;penam
ARO:3001739	ENX16434.1	OXA beta-lactamase	product inactivation	carbapenem;cephalosporin;penam
ARO:3001740	ENX26326.1	OXA beta-lactamase	product inactivation	carbapenem;cephalosporin;penam
ARO:3001741	ENU21708.1	OXA beta-lactamase	product inactivation	carbapenem;cephalosporin;penam
ARO:3001742	WP_032865068.1	OXA beta-lactamase	product inactivation	carbapenem;cephalosporin;penam
ARO:3001743	ENX60508.1	OXA beta-lactamase	product inactivation	carbapenem;cephalosporin;penam
ARO:3001746	ENW94121.1	OXA beta-lactamase	product inactivation	carbapenem;cephalosporin;penam
ARO:3001747	ENX53612.1	OXA beta-lactamase	product inactivation	carbapenem;cephalosporin;penam
ARO:3001748	WP_032877719.1	OXA beta-lactamase	product inactivation	carbapenem;cephalosporin;penam
ARO:3001749	ENU93232.1	OXA beta-lactamase	product inactivation	carbapenem;cephalosporin;penam
ARO:3001750	ENX19403.1	OXA beta-lactamase	product inactivation	carbapenem;cephalosporin;penam
ARO:3001751	ENU21024.1	OXA beta-lactamase	product inactivation	carbapenem;cephalosporin;penam
ARO:3001752	ENX09209.1	OXA beta-lactamase	product inactivation	carbapenem;cephalosporin;penam
ARO:3001753	ENX40034.1	OXA beta-lactamase	product inactivation	carbapenem;cephalosporin;penam
ARO:3001754	ENV82218.1	OXA beta-lactamase	product inactivation	carbapenem;cephalosporin;penam
ARO:3001755	ENV20093.1	OXA beta-lactamase	product inactivation	carbapenem;cephalosporin;penam
ARO:3001756	ENV90372.1	OXA beta-lactamase	product inactivation	carbapenem;cephalosporin;penam
ARO:3001757	ENX18112.1	OXA beta-lactamase	product inactivation	carbapenem;cephalosporin;penam
ARO:3001758	ENX56371.1	OXA beta-lactamase	product inactivation	carbapenem;cephalosporin;penam
ARO:3001759	ENX45276.1	OXA beta-lactamase	product inactivation	carbapenem;cephalosporin;penam
ARO:3001760	ENV02983.1	OXA beta-lactamase	product inactivation	carbapenem;cephalosporin;penam
ARO:3001761	ENX38336.1	OXA beta-lactamase	product inactivation	carbapenem;cephalosporin;penam
ARO:3001762	WP_032879257.1	OXA beta-lactamase	product inactivation	carbapenem;cephalosporin;penam
ARO:3001763	ENV32314.1	OXA beta-lactamase	product inactivation	carbapenem;cephalosporin;penam
ARO:3001764	AAU88145.1	OXA beta-lactamase	product inactivation	carbapenem;cephalosporin;penam
ARO:3001765	ABW76134.1	OXA beta-lactamase	product inactivation	carbapenem;cephalosporin;penam
ARO:3001766	ADZ54048.1	OXA beta-lactamase	product inactivation	carbapenem;cephalosporin;penam
ARO:3001767	ABW76138.1	OXA beta-lactamase	product inactivation	carbapenem;cephalosporin;penam
ARO:3001768	AAK55330.1	OXA beta-lactamase	product inactivation	carbapenem;cephalosporin;penam
ARO:3001769	CAD32564.1	OXA beta-lactamase	product inactivation	carbapenem;cephalosporin;penam
ARO:3001770	CAD32565.1	OXA beta-lactamase	product inactivation	carbapenem;cephalosporin;penam
ARO:3001771	CAF74882.1	OXA beta-lactamase	product inactivation	carbapenem;cephalosporin;penam
ARO:3001772	CAG15145.1	OXA beta-lactamase	product inactivation	carbapenem;cephalosporin;penam
ARO:3001773	AAT01092.1	OXA beta-lactamase	product inactivation	carbapenem;cephalosporin;penam
ARO:3001774	AHF71363.1	OXA beta-lactamase	product inactivation	carbapenem;cephalosporin;penam
ARO:3001775	AAN41427.1	OXA beta-lactamase	product inactivation	carbapenem;cephalosporin;penam
ARO:3001776	ADG27454.1	OXA beta-lactamase	product inactivation	carbapenem;cephalosporin;penam
ARO:3001777	AET35493.1	OXA beta-lactamase	product inactivation	carbapenem;cephalosporin;penam
ARO:3001778	AGD91915.1	OXA beta-lactamase	product inactivation	carbapenem;cephalosporin;penam
ARO:3001779	ACI28281.1	OXA beta-lactamase	product inactivation	carbapenem;cephalosporin;penam
ARO:3001780	AAP69916.1	OXA beta-lactamase	product inactivation	carbapenem;cephalosporin;penam
ARO:3001781	AAP69225.1	OXA beta-lactamase	product inactivation	carbapenem;cephalosporin;penam
ARO:3001782	AAP70012.1	OXA beta-lactamase	product inactivation	carbapenem;cephalosporin;penam
ARO:3001783	ADY06444.1	OXA beta-lactamase	product inactivation	carbapenem;cephalosporin;penam
ARO:3001784	AEP16366.1	OXA beta-lactamase	product inactivation	carbapenem;cephalosporin;penam
ARO:3001785	AAW22056.1	OXA beta-lactamase	product inactivation	carbapenem;cephalosporin;penam
ARO:3001786	AGC60012.1	OXA beta-lactamase	product inactivation	carbapenem;cephalosporin;penam
ARO:3001787	AGC60013.1	OXA beta-lactamase	product inactivation	carbapenem;cephalosporin;penam
ARO:3001788	AFU91598.1	OXA beta-lactamase	product inactivation	carbapenem;cephalosporin;penam
ARO:3001791	AGC70814.1	OXA beta-lactamase	product inactivation	carbapenem;cephalosporin;penam
ARO:3001792	AAR32134.1	OXA beta-lactamase	product inactivation	carbapenem;cephalosporin;penam
ARO:3001793	AGR55864.1	OXA beta-lactamase	product inactivation	carbapenem;cephalosporin;penam
ARO:3001794	CAD58780.1	OXA beta-lactamase	product inactivation	carbapenem;cephalosporin;penam
ARO:3001795	AAR32651.1	OXA beta-lactamase	product inactivation	carbapenem;cephalosporin;penam
ARO:3001796	AAQ76277.1	OXA beta-lactamase	product inactivation	carbapenem;cephalosporin;penam
ARO:3001797	AFP97030.1	OXA beta-lactamase	product inactivation	carbapenem;cephalosporin;penam
ARO:3001798	CAH69530.1	OXA beta-lactamase	product inactivation	carbapenem;cephalosporin;penam
ARO:3001799	ACT09125.1	OXA beta-lactamase	product inactivation	carbapenem;cephalosporin;penam
ARO:3001800	ACM67635.1	OXA beta-lactamase	product inactivation	carbapenem;cephalosporin;penam
ARO:3001801	ACO72579.1	OXA beta-lactamase	product inactivation	carbapenem;cephalosporin;penam
ARO:3001802	ABQ15112.1	OXA beta-lactamase	product inactivation	carbapenem;cephalosporin;penam
ARO:3001803	ABY79006.1	OXA beta-lactamase	product inactivation	carbapenem;cephalosporin;penam
ARO:3001804	ACN85419.1	OXA beta-lactamase	product inactivation	carbapenem;cephalosporin;penam
ARO:3001805	ADT70779.1	OXA beta-lactamase	product inactivation	carbapenem;cephalosporin;penam
ARO:3001806	AEQ73521.1	OXA beta-lactamase	product inactivation	carbapenem;cephalosporin;penam
ARO:3001807	AHC31001.1	OXA beta-lactamase	product inactivation	carbapenem;cephalosporin;penam
ARO:3001808	AAQ08905.1	OXA beta-lactamase	product inactivation	carbapenem;cephalosporin;penam
ARO:3001809	AEM66528.1	OXA beta-lactamase	product inactivation	carbapenem;cephalosporin;penam
ARO:3001810	AAP43641.1	OXA beta-lactamase	product inactivation	carbapenem;cephalosporin;penam
ARO:3001811	CAP69660.1	OXA beta-lactamase	product inactivation	carbapenem;cephalosporin;penam
ARO:3001812	AAR89917.1	OXA beta-lactamase	product inactivation	carbapenem;cephalosporin;penam
ARO:3001813	AAR03105.1	OXA beta-lactamase	product inactivation	carbapenem;cephalosporin;penam
ARO:3001814	AFC95894.1	OXA beta-lactamase	product inactivation	carbapenem;cephalosporin;penam
ARO:3001815	CAB46491.1	ACC beta-lactamase	product inactivation	cephalosporin;monobactam;penam
ARO:3001816	AAF86691.1	ACC beta-lactamase	product inactivation	cephalosporin;monobactam;penam
ARO:3001817	AAF86697.1	ACC beta-lactamase	product inactivation	cephalosporin;monobactam;penam
ARO:3001818	ABP49606.1	ACC beta-lactamase	product inactivation	cephalosporin;monobactam;penam
ARO:3001819	CCK86740.1	ACC beta-lactamase	product inactivation	cephalosporin;monobactam;penam
ARO:3001821	AAC45086.2	ACT beta-lactamase	product inactivation	carbapenem;cephalosporin;cephamycin;penam
ARO:3001822	CAJ28994.1	ACT beta-lactamase	product inactivation	carbapenem;cephalosporin;cephamycin;penam
ARO:3001823	ABL67017.1	ACT beta-lactamase	product inactivation	carbapenem;cephalosporin;cephamycin;penam
ARO:3001824	ACJ05689.1	ACT beta-lactamase	product inactivation	carbapenem;cephalosporin;cephamycin;penam
ARO:3001825	ACJ05686.1	ACT beta-lactamase	product inactivation	carbapenem;cephalosporin;cephamycin;penam
ARO:3001826	AEI70575.1	ACT beta-lactamase	product inactivation	carbapenem;cephalosporin;cephamycin;penam
ARO:3001827	BAM34463.1	ACT beta-lactamase	product inactivation	carbapenem;cephalosporin;cephamycin;penam
ARO:3001828	AGU38146.1	ACT beta-lactamase	product inactivation	carbapenem;cephalosporin;cephamycin;penam
ARO:3001829	ABZ81086.1	ACT beta-lactamase	product inactivation	carbapenem;cephalosporin;cephamycin;penam
ARO:3001830	ACJ05688.1	ACT beta-lactamase	product inactivation	carbapenem;cephalosporin;cephamycin;penam
ARO:3001831	CBI75448.1	ACT beta-lactamase	product inactivation	carbapenem;cephalosporin;cephamycin;penam
ARO:3001832	AEV91214.1	ACT beta-lactamase	product inactivation	carbapenem;cephalosporin;cephamycin;penam
ARO:3001834	AFU25650.1	ACT beta-lactamase	product inactivation	carbapenem;cephalosporin;cephamycin;penam
ARO:3001835	CCK86741.1	ACT beta-lactamase	product inactivation	carbapenem;cephalosporin;cephamycin;penam
ARO:3001836	AFU25647.1	ACT beta-lactamase	product inactivation	carbapenem;cephalosporin;cephamycin;penam
ARO:3001837	AFU25653.1	ACT beta-lactamase	product inactivation	carbapenem;cephalosporin;cephamycin;penam
ARO:3001838	AHM76771.1	ACT beta-lactamase	product inactivation	carbapenem;cephalosporin;cephamycin;penam
ARO:3001839	AHM76777.1	ACT beta-lactamase	product inactivation	carbapenem;cephalosporin;cephamycin;penam
ARO:3001840	AHM76779.1	ACT beta-lactamase	product inactivation	carbapenem;cephalosporin;cephamycin;penam
ARO:3001841	AHA80105.1	ACT beta-lactamase	product inactivation	carbapenem;cephalosporin;cephamycin;penam
ARO:3001842	AHA80106.1	ACT beta-lactamase	product inactivation	carbapenem;cephalosporin;cephamycin;penam
ARO:3001843	AHM76774.1	ACT beta-lactamase	product inactivation	carbapenem;cephalosporin;cephamycin;penam
ARO:3001844	AHL39336.1	ACT beta-lactamase	product inactivation	carbapenem;cephalosporin;cephamycin;penam
ARO:3001845	AHL39338.1	ACT beta-lactamase	product inactivation	carbapenem;cephalosporin;cephamycin;penam
ARO:3001847	AHL39340.1	ACT beta-lactamase	product inactivation	carbapenem;cephalosporin;cephamycin;penam
ARO:3001848	AHL39333.1	ACT beta-lactamase	product inactivation	carbapenem;cephalosporin;cephamycin;penam
ARO:3001849	AIT76085.1	ACT beta-lactamase	product inactivation	carbapenem;cephalosporin;cephamycin;penam
ARO:3001850	AIT76086.1	ACT beta-lactamase	product inactivation	carbapenem;cephalosporin;cephamycin;penam
ARO:3001851	AIT76096.1	ACT beta-lactamase	product inactivation	carbapenem;cephalosporin;cephamycin;penam
ARO:3001852	AIT76088.1	ACT beta-lactamase	product inactivation	carbapenem;cephalosporin;cephamycin;penam
ARO:3001853	AIT76087.1	ACT beta-lactamase	product inactivation	carbapenem;cephalosporin;cephamycin;penam
ARO:3001854	WP_063857778.1	ACT beta-lactamase	product inactivation	carbapenem;cephalosporin;cephamycin;penam
ARO:3001855	BAP68758.1	ACT beta-lactamase	product inactivation	carbapenem;cephalosporin;cephamycin;penam
ARO:3001856	BAC76072.1	CMY beta-lactamase	product inactivation	cephamycin
ARO:3001857	CAA55007.1	CMY beta-lactamase	product inactivation	cephamycin
ARO:3001858	AAA93461.1	IMI beta-lactamase	product inactivation	carbapenem
ARO:3001859	ABA00479.1	IMI beta-lactamase	product inactivation	carbapenem
ARO:3001860	ACX71212.1	IMI beta-lactamase	product inactivation	carbapenem
ARO:3001861	AHE78014.1	IMI beta-lactamase	product inactivation	carbapenem
ARO:3001862	WP_085562405.1	IMI beta-lactamase	product inactivation	carbapenem
ARO:3001863	WP_063860570.1	IMI beta-lactamase	product inactivation	carbapenem
ARO:3001864	CAA63262.1	CTX-M beta-lactamase	product inactivation	cephalosporin
ARO:3001865	AAZ95872.1	CTX-M beta-lactamase	product inactivation	cephalosporin
ARO:3001866	CAA71321.1	CTX-M beta-lactamase	product inactivation	cephalosporin;cephamycin;penam
ARO:3001867	CAA74573.1	CTX-M beta-lactamase	product inactivation	cephalosporin
ARO:3001868	AAC32890.1	CTX-M beta-lactamase	product inactivation	cephalosporin
ARO:3001869	CAA06311.1	CTX-M beta-lactamase	product inactivation	cephalosporin
ARO:3001870	CAA06312.1	CTX-M beta-lactamase	product inactivation	cephalosporin
ARO:3001871	AAF04388.1	CTX-M beta-lactamase	product inactivation	cephalosporin
ARO:3001872	AAF05311.2	CTX-M beta-lactamase	product inactivation	cephalosporin
ARO:3001873	AAT68658.1	CTX-M beta-lactamase	product inactivation	cephalosporin
ARO:3001874	AAF93177.1	CTX-M beta-lactamase	product inactivation	cephalosporin
ARO:3001875	AAG34108.1	CTX-M beta-lactamase	product inactivation	cephalosporin
ARO:3001876	AAF72531.1	CTX-M beta-lactamase	product inactivation	cephalosporin
ARO:3001877	AAF72530.1	CTX-M beta-lactamase	product inactivation	cephalosporin
ARO:3001878	AAL02127.1	CTX-M beta-lactamase	product inactivation	cephalosporin;penam
ARO:3001879	AAK32961.1	CTX-M beta-lactamase	product inactivation	cephalosporin
ARO:3001880	AAK71471.1	CTX-M beta-lactamase	product inactivation	cephalosporin
ARO:3001881	AAK55534.1	CTX-M beta-lactamase	product inactivation	cephalosporin
ARO:3001882	CAC95175.1	CTX-M beta-lactamase	product inactivation	cephalosporin
ARO:3001883	CAD08929.1	CTX-M beta-lactamase	product inactivation	cephalosporin
ARO:3001884	AAL86924.1	CTX-M beta-lactamase	product inactivation	cephalosporin
ARO:3001885	AAL99990.1	CTX-M beta-lactamase	product inactivation	cephalosporin
ARO:3001886	AAN38836.1	CTX-M beta-lactamase	product inactivation	cephalosporin
ARO:3001887	AAM70498.1	CTX-M beta-lactamase	product inactivation	cephalosporin
ARO:3001888	AAN75444.1	CTX-M beta-lactamase	product inactivation	cephalosporin
ARO:3001889	AAO61597.1	CTX-M beta-lactamase	product inactivation	carbapenem;cephalosporin;penam
ARO:3001890	CAD70280.1	CTX-M beta-lactamase	product inactivation	cephalosporin
ARO:3001891	AAP22736.1	CTX-M beta-lactamase	product inactivation	cephalosporin
ARO:3001892	AAP43508.1	CTX-M beta-lactamase	product inactivation	cephalosporin
ARO:3001893	CAD99181.1	CTX-M beta-lactamase	product inactivation	cephalosporin
ARO:3001894	CAD89606.1	CTX-M beta-lactamase	product inactivation	cephalosporin
ARO:3001895	AAO88912.1	CTX-M beta-lactamase	product inactivation	cephalosporin
ARO:3001896	AAR99493.1	CTX-M beta-lactamase	product inactivation	cephalosporin
ARO:3001897	BAD83775.1	CTX-M beta-lactamase	product inactivation	cephalosporin
ARO:3001898	BAD16611.1	CTX-M beta-lactamase	product inactivation	cephalosporin
ARO:3001899	AAT70415.1	CTX-M beta-lactamase	product inactivation	cephalosporin
ARO:3001900	AAV70602.1	CTX-M beta-lactamase	product inactivation	cephalosporin
ARO:3001901	AAX54694.1	CTX-M beta-lactamase	product inactivation	cephalosporin
ARO:3001902	AAV28215.2	CTX-M beta-lactamase	product inactivation	cephalosporin
ARO:3001903	AAY43008.1	CTX-M beta-lactamase	product inactivation	cephalosporin
ARO:3001904	AAY84742.1	CTX-M beta-lactamase	product inactivation	cephalosporin
ARO:3001905	AAZ14955.1	CTX-M beta-lactamase	product inactivation	cephalosporin
ARO:3001906	BAA07082.1	CTX-M beta-lactamase	product inactivation	cephalosporin
ARO:3001907	BAA28282.1	CTX-M beta-lactamase	product inactivation	cephalosporin
ARO:3001908	AAV97956.1	CTX-M beta-lactamase	product inactivation	cephalosporin
ARO:3001909	AAV97952.1	CTX-M beta-lactamase	product inactivation	cephalosporin
ARO:3001910	AAV97953.1	CTX-M beta-lactamase	product inactivation	cephalosporin
ARO:3001911	AAV97954.1	CTX-M beta-lactamase	product inactivation	cephalosporin
ARO:3001912	AAV97955.1	CTX-M beta-lactamase	product inactivation	cephalosporin
ARO:3001913	ABA62022.1	CTX-M beta-lactamase	product inactivation	cephalosporin
ARO:3001914	ABB17185.1	CTX-M beta-lactamase	product inactivation	cephalosporin
ARO:3001915	ABB72225.1	CTX-M beta-lactamase	product inactivation	cephalosporin
ARO:3001916	ABC18328.3	CTX-M beta-lactamase	product inactivation	cephalosporin
ARO:3001917	ABI34705.1	CTX-M beta-lactamase	product inactivation	cephalosporin
ARO:3001918	ABN48311.1	CTX-M beta-lactamase	product inactivation	cephalosporin
ARO:3001919	ABM97538.1	CTX-M beta-lactamase	product inactivation	cephalosporin
ARO:3001920	ABD73290.1	CTX-M beta-lactamase	product inactivation	cephalosporin
ARO:3001921	CAL80726.1	CTX-M beta-lactamase	product inactivation	cephalosporin
ARO:3001922	ABN09669.1	CTX-M beta-lactamase	product inactivation	cephalosporin
ARO:3001923	ABP04245.1	CTX-M beta-lactamase	product inactivation	cephalosporin
ARO:3001924	BAD90119.1	CTX-M beta-lactamase	product inactivation	cephalosporin
ARO:3001925	BAF63422.1	CTX-M beta-lactamase	product inactivation	cephalosporin
ARO:3001926	ABN69105.1	CTX-M beta-lactamase	product inactivation	cephalosporin
ARO:3001927	ABQ45409.1	CTX-M beta-lactamase	product inactivation	cephalosporin
ARO:3001928	ABS90365.1	CTX-M beta-lactamase	product inactivation	cephalosporin
ARO:3001929	ABV81082.1	CTX-M beta-lactamase	product inactivation	cephalosporin
ARO:3001930	ABY91281.1	CTX-M beta-lactamase	product inactivation	cephalosporin
ARO:3001932	ACV92002.1	CTX-M beta-lactamase	product inactivation	cephalosporin
ARO:3001933	AAV97957.1	CTX-M beta-lactamase	product inactivation	cephalosporin
ARO:3001934	WP_063860072.1	CTX-M beta-lactamase	product inactivation	cephalosporin
ARO:3001935	ACS32293.1	CTX-M beta-lactamase	product inactivation	cephalosporin
ARO:3001936	ACS32294.1	CTX-M beta-lactamase	product inactivation	cephalosporin
ARO:3001937	CAQ42486.1	CTX-M beta-lactamase	product inactivation	cephalosporin
ARO:3001938	CAQ42480.1	CTX-M beta-lactamase	product inactivation	cephalosporin
ARO:3001939	CAQ42481.2	CTX-M beta-lactamase	product inactivation	cephalosporin
ARO:3001940	ABO09821.1	CTX-M beta-lactamase	product inactivation	cephalosporin
ARO:3001941	ABW86620.2	CTX-M beta-lactamase	product inactivation	cephalosporin
ARO:3001942	ABV57756.3	CTX-M beta-lactamase	product inactivation	cephalosporin
ARO:3001943	ABB59946.1	CTX-M beta-lactamase	product inactivation	cephalosporin
ARO:3001944	ACI29345.1	CTX-M beta-lactamase	product inactivation	cephalosporin
ARO:3001945	ACI29346.1	CTX-M beta-lactamase	product inactivation	cephalosporin
ARO:3001946	ACI29348.1	CTX-M beta-lactamase	product inactivation	cephalosporin
ARO:3001947	ACB41777.1	CTX-M beta-lactamase	product inactivation	cephalosporin
ARO:3001948	WP_063860086.1	CTX-M beta-lactamase	product inactivation	cephalosporin
ARO:3001949	ACR56321.1	CTX-M beta-lactamase	product inactivation	cephalosporin
ARO:3001950	ACQ99521.1	CTX-M beta-lactamase	product inactivation	cephalosporin
ARO:3001951	ACX34099.1	CTX-M beta-lactamase	product inactivation	cephalosporin
ARO:3001952	ACY74743.1	CTX-M beta-lactamase	product inactivation	cephalosporin
ARO:3001953	ADN26580.1	CTX-M beta-lactamase	product inactivation	cephalosporin
ARO:3001954	ADK11041.1	CTX-M beta-lactamase	product inactivation	cephalosporin
ARO:3001955	CBL80615.1	CTX-M beta-lactamase	product inactivation	cephalosporin
ARO:3001956	CAG28417.1	CTX-M beta-lactamase	product inactivation	cephalosporin
ARO:3001957	ADO17948.1	CTX-M beta-lactamase	product inactivation	cephalosporin
ARO:3001958	ADL27532.1	CTX-M beta-lactamase	product inactivation	cephalosporin
ARO:3001959	CBW46935.1	CTX-M beta-lactamase	product inactivation	cephalosporin
ARO:3001960	ADY02545.1	CTX-M beta-lactamase	product inactivation	cephalosporin
ARO:3001961	ADY02546.1	CTX-M beta-lactamase	product inactivation	cephalosporin
ARO:3001962	CDG50843.1	CTX-M beta-lactamase	product inactivation	cephalosporin
ARO:3001963	ADY02555.1	CTX-M beta-lactamase	product inactivation	cephalosporin
ARO:3001965	ADY02554.1	CTX-M beta-lactamase	product inactivation	cephalosporin
ARO:3001966	ADZ31262.1	CTX-M beta-lactamase	product inactivation	cephalosporin
ARO:3001967	AEM44650.1	CTX-M beta-lactamase	product inactivation	cephalosporin
ARO:3001968	AEM44651.1	CTX-M beta-lactamase	product inactivation	cephalosporin
ARO:3001969	AEM44654.1	CTX-M beta-lactamase	product inactivation	cephalosporin
ARO:3001970	AEM44648.1	CTX-M beta-lactamase	product inactivation	cephalosporin
ARO:3001971	AEM44649.1	CTX-M beta-lactamase	product inactivation	cephalosporin
ARO:3001972	AEM44652.1	CTX-M beta-lactamase	product inactivation	cephalosporin
ARO:3001973	AEM44653.1	CTX-M beta-lactamase	product inactivation	cephalosporin
ARO:3001974	ACU00153.1	CTX-M beta-lactamase	product inactivation	cephalosporin
ARO:3001975	AIL54055.1	CTX-M beta-lactamase	product inactivation	cephalosporin
ARO:3001976	AEI70324.1	CTX-M beta-lactamase	product inactivation	cephalosporin
ARO:3001977	AET99223.1	CTX-M beta-lactamase	product inactivation	cephalosporin
ARO:3001980	AFA51699.1	CTX-M beta-lactamase	product inactivation	cephalosporin
ARO:3001981	AFA51700.1	CTX-M beta-lactamase	product inactivation	cephalosporin
ARO:3001982	AFA51701.1	CTX-M beta-lactamase	product inactivation	cephalosporin
ARO:3001983	AFH88134.1	CTX-M beta-lactamase	product inactivation	cephalosporin
ARO:3001984	AFO69261.1	CTX-M beta-lactamase	product inactivation	cephalosporin
ARO:3001985	BAL72196.1	CTX-M beta-lactamase	product inactivation	cephalosporin
ARO:3001986	WP_088245211.1	CTX-M beta-lactamase	product inactivation	cephalosporin
ARO:3001988	AFJ59956.1	CTX-M beta-lactamase	product inactivation	cephalosporin
ARO:3001989	AFJ59957.1	CTX-M beta-lactamase	product inactivation	cephalosporin
ARO:3001990	AEW46676.3	CTX-M beta-lactamase	product inactivation	cephalosporin
ARO:3001991	AFQ94051.1	CTX-M beta-lactamase	product inactivation	cephalosporin
ARO:3001992	AFX60298.1	CTX-M beta-lactamase	product inactivation	cephalosporin
ARO:3001994	BAO37256.1	CTX-M beta-lactamase	product inactivation	cephalosporin
ARO:3001995	AGG08693.1	CTX-M beta-lactamase	product inactivation	cephalosporin
ARO:3001996	WP_070064534.1	CTX-M beta-lactamase	product inactivation	cephalosporin
ARO:3001997	AFY98865.1	CTX-M beta-lactamase	product inactivation	cephalosporin
ARO:3001998	WP_063108644.1	CTX-M beta-lactamase	product inactivation	cephalosporin
ARO:3001999	AGN11769.1	CTX-M beta-lactamase	product inactivation	cephalosporin
ARO:3002000	AGW25368.1	CTX-M beta-lactamase	product inactivation	cephalosporin
ARO:3002001	WP_156404649.1	CTX-M beta-lactamase	product inactivation	cephalosporin
ARO:3002002	AHX39588.1	CTX-M beta-lactamase	product inactivation	cephalosporin
ARO:3002004	WP_102607454.1	CTX-M beta-lactamase	product inactivation	cephalosporin
ARO:3002005	AHA80961.1	CTX-M beta-lactamase	product inactivation	cephalosporin
ARO:3002006	AHX39589.1	CTX-M beta-lactamase	product inactivation	cephalosporin
ARO:3002007	WP_063859959.1	CTX-M beta-lactamase	product inactivation	cephalosporin
ARO:3002008	BAP34782.1	CTX-M beta-lactamase	product inactivation	cephalosporin
ARO:3002009	AHY20039.1	CTX-M beta-lactamase	product inactivation	cephalosporin
ARO:3002010	WP_168247876.1	CTX-M beta-lactamase	product inactivation	cephalosporin
ARO:3002011	WP_110093562.1	CTX-M beta-lactamase	product inactivation	cephalosporin
ARO:3002012	CAA63264.1	CMY beta-lactamase	product inactivation	cephamycin
ARO:3002013	CAA62957.1	CMY beta-lactamase	product inactivation	carbapenem;cephalosporin;cephamycin;penam
ARO:3002015	CAA75402.1	CMY beta-lactamase	product inactivation	cephamycin
ARO:3002016	CAB50867.1	CMY beta-lactamase	product inactivation	cephamycin
ARO:3002017	CAB36902.1	CMY beta-lactamase	product inactivation	cephamycin
ARO:3002018	CAB36900.1	CMY beta-lactamase	product inactivation	cephamycin
ARO:3002019	AAD50818.2	CMY beta-lactamase	product inactivation	cephamycin
ARO:3002020	BAB72158.1	CMY beta-lactamase	product inactivation	cephamycin
ARO:3002021	AAK31368.1	CMY beta-lactamase	product inactivation	cephamycin
ARO:3002022	AAK31370.1	CMY beta-lactamase	product inactivation	cephamycin
ARO:3002023	CAA76382.1	CMY beta-lactamase	product inactivation	cephamycin
ARO:3002024	AAQ16660.2	CMY beta-lactamase	product inactivation	cephamycin
ARO:3002025	CAD88479.1	CMY beta-lactamase	product inactivation	cephamycin
ARO:3002026	CAD88477.1	CMY beta-lactamase	product inactivation	cephamycin
ARO:3002027	CAH03679.1	CMY beta-lactamase	product inactivation	cephamycin
ARO:3002028	AAS13399.1	CMY beta-lactamase	product inactivation	cephamycin
ARO:3002029	AAU95778.1	CMY beta-lactamase	product inactivation	cephamycin
ARO:3002030	BAE48233.1	CMY beta-lactamase	product inactivation	cephamycin
ARO:3002031	AAX58682.2	CMY beta-lactamase	product inactivation	cephamycin
ARO:3002032	AAZ66866.1	CMY beta-lactamase	product inactivation	cephamycin
ARO:3002033	ABB72431.1	CMY beta-lactamase	product inactivation	cephamycin
ARO:3002034	ABF06441.1	CMY beta-lactamase	product inactivation	cephamycin
ARO:3002035	ABN69070.1	CMY beta-lactamase	product inactivation	cephamycin
ARO:3002036	ACA30420.1	CMY beta-lactamase	product inactivation	cephamycin
ARO:3002037	BAF56185.1	CMY beta-lactamase	product inactivation	cephamycin
ARO:3002038	ACA30421.1	CMY beta-lactamase	product inactivation	cephamycin
ARO:3002039	ABQ51091.1	CMY beta-lactamase	product inactivation	cephamycin
ARO:3002040	ABS12248.1	CMY beta-lactamase	product inactivation	cephamycin
ARO:3002041	ABS12249.1	CMY beta-lactamase	product inactivation	cephamycin
ARO:3002042	ABR18736.1	CMY beta-lactamase	product inactivation	cephamycin
ARO:3002043	ACA97846.1	CMY beta-lactamase	product inactivation	cephamycin
ARO:3002044	ACA97847.1	CMY beta-lactamase	product inactivation	cephamycin
ARO:3002045	ABN51006.1	CMY beta-lactamase	product inactivation	cephamycin
ARO:3002046	ABN51007.1	CMY beta-lactamase	product inactivation	cephamycin
ARO:3002047	ABY58049.1	CMY beta-lactamase	product inactivation	cephamycin
ARO:3002048	BAF36388.1	CMY beta-lactamase	product inactivation	cephamycin
ARO:3002049	CAP60699.1	CMY beta-lactamase	product inactivation	cephamycin
ARO:3002050	BAF95726.1	CMY beta-lactamase	product inactivation	cephamycin
ARO:3002051	ACA30422.1	CMY beta-lactamase	product inactivation	cephamycin
ARO:3002052	BAG14343.1	CMY beta-lactamase	product inactivation	cephamycin
ARO:3002053	ADM21467.1	CMY beta-lactamase	product inactivation	cephalosporin;cephamycin
ARO:3002054	ACJ05361.1	CMY beta-lactamase	product inactivation	cephamycin
ARO:3002055	ACJ65711.1	CMY beta-lactamase	product inactivation	cephamycin
ARO:3002056	CBB16411.1	CMY beta-lactamase	product inactivation	cephamycin
ARO:3002057	CBH19182.1	CMY beta-lactamase	product inactivation	cephamycin
ARO:3002058	ADH82410.1	CMY beta-lactamase	product inactivation	cephamycin
ARO:3002059	ADP02979.1	CMY beta-lactamase	product inactivation	cephamycin
ARO:3002060	ACV32310.1	CMY beta-lactamase	product inactivation	cephamycin
ARO:3002061	CBI75447.1	CMY beta-lactamase	product inactivation	cephamycin
ARO:3002062	AFK73431.1	CMY beta-lactamase	product inactivation	cephamycin
ARO:3002064	ADQ38362.1	CMY beta-lactamase	product inactivation	cephamycin
ARO:3002065	ADK55604.1	CMY beta-lactamase	product inactivation	cephamycin
ARO:3002066	ADK55605.1	CMY beta-lactamase	product inactivation	cephamycin
ARO:3002067	ADT91162.1	CMY beta-lactamase	product inactivation	cephamycin
ARO:3002068	ADP37961.1	CMY beta-lactamase	product inactivation	cephamycin
ARO:3002069	BAJ17544.1	CMY beta-lactamase	product inactivation	cephamycin
ARO:3002070	AGU59995.1	CMY beta-lactamase	product inactivation	cephamycin
ARO:3002071	BAO05497.1	CMY beta-lactamase	product inactivation	cephamycin
ARO:3002072	ADY19254.1	CMY beta-lactamase	product inactivation	cephamycin
ARO:3002073	AEM97672.1	CMY beta-lactamase	product inactivation	cephamycin
ARO:3002074	AEM97673.1	CMY beta-lactamase	product inactivation	cephamycin
ARO:3002075	AEM97674.1	CMY beta-lactamase	product inactivation	cephamycin
ARO:3002076	AET07387.1	CMY beta-lactamase	product inactivation	cephamycin
ARO:3002077	ADW84690.1	CMY beta-lactamase	product inactivation	cephamycin
ARO:3002078	AEI52842.1	CMY beta-lactamase	product inactivation	cephamycin
ARO:3002079	AEZ49849.1	CMY beta-lactamase	product inactivation	cephamycin
ARO:3002080	AFK08541.1	CMY beta-lactamase	product inactivation	cephamycin
ARO:3002081	AEZ49855.1	CMY beta-lactamase	product inactivation	cephamycin
ARO:3002082	AGE45504.1	CMY beta-lactamase	product inactivation	cephamycin
ARO:3002083	AFU25635.1	CMY beta-lactamase	product inactivation	cephamycin
ARO:3002084	AFK08538.1	CMY beta-lactamase	product inactivation	cephamycin
ARO:3002085	AFU25641.1	CMY beta-lactamase	product inactivation	cephamycin
ARO:3002086	ACU00152.1	CMY beta-lactamase	product inactivation	cephamycin
ARO:3002087	AFU25632.1	CMY beta-lactamase	product inactivation	cephamycin
ARO:3002088	AFK73434.1	CMY beta-lactamase	product inactivation	cephamycin
ARO:3002089	AFK73437.1	CMY beta-lactamase	product inactivation	cephamycin
ARO:3002090	AFU25644.1	CMY beta-lactamase	product inactivation	cephamycin
ARO:3002091	AFK73443.1	CMY beta-lactamase	product inactivation	cephamycin
ARO:3002092	AFK73446.1	CMY beta-lactamase	product inactivation	cephamycin
ARO:3002093	AFK73449.1	CMY beta-lactamase	product inactivation	cephamycin
ARO:3002094	AFK73452.1	CMY beta-lactamase	product inactivation	cephamycin
ARO:3002095	AHL39324.1	CMY beta-lactamase	product inactivation	cephamycin
ARO:3002096	AFU25638.1	CMY beta-lactamase	product inactivation	cephamycin
ARO:3002097	AFK73455.1	CMY beta-lactamase	product inactivation	cephamycin
ARO:3002098	AHL39322.1	CMY beta-lactamase	product inactivation	cephamycin
ARO:3002099	AHL39327.1	CMY beta-lactamase	product inactivation	cephamycin
ARO:3002100	BAL63057.1	CMY beta-lactamase	product inactivation	cephamycin
ARO:3002102	CCK86742.1	CMY beta-lactamase	product inactivation	cephamycin
ARO:3002103	CCK86743.1	CMY beta-lactamase	product inactivation	cephamycin
ARO:3002106	AHM76768.1	CMY beta-lactamase	product inactivation	cephamycin
ARO:3002107	AGC54798.1	CMY beta-lactamase	product inactivation	cephamycin
ARO:3002108	AGC54799.1	CMY beta-lactamase	product inactivation	cephamycin
ARO:3002109	WP_063859917.1	CMY beta-lactamase	product inactivation	cephamycin
ARO:3002110	AFZ85213.1	CMY beta-lactamase	product inactivation	cephamycin
ARO:3002111	AGH70380.1	CMY beta-lactamase	product inactivation	cephamycin
ARO:3002112	AHA80101.1	CMY beta-lactamase	product inactivation	cephamycin
ARO:3002113	AHA80102.1	CMY beta-lactamase	product inactivation	cephamycin
ARO:3002114	AHA80103.1	CMY beta-lactamase	product inactivation	cephamycin
ARO:3002115	AHA80104.1	CMY beta-lactamase	product inactivation	cephamycin
ARO:3002116	AGR82311.1	CMY beta-lactamase	product inactivation	cephamycin
ARO:3002117	AHL39330.1	CMY beta-lactamase	product inactivation	cephamycin
ARO:3002118	WP_063859654.1	CMY beta-lactamase	product inactivation	cephamycin
ARO:3002119	WP_032494240.1	CMY beta-lactamase	product inactivation	cephamycin
ARO:3002120	AGZ20169.1	CMY beta-lactamase	product inactivation	cephamycin
ARO:3002121	WP_032948363.1	CMY beta-lactamase	product inactivation	cephamycin
ARO:3002122	AHW47897.1	CMY beta-lactamase	product inactivation	cephamycin
ARO:3002123	AIT76090.1	CMY beta-lactamase	product inactivation	cephamycin
ARO:3002124	AIT76089.1	CMY beta-lactamase	product inactivation	cephamycin
ARO:3002125	AIT76099.1	CMY beta-lactamase	product inactivation	cephamycin
ARO:3002126	AIT76092.1	CMY beta-lactamase	product inactivation	cephamycin
ARO:3002127	AIT76093.1	CMY beta-lactamase	product inactivation	cephamycin
ARO:3002128	AIT76097.1	CMY beta-lactamase	product inactivation	cephamycin
ARO:3002129	AIT76091.1	CMY beta-lactamase	product inactivation	cephamycin
ARO:3002130	AIT76098.1	CMY beta-lactamase	product inactivation	cephamycin
ARO:3002132	CAA76196.1	DHA beta-lactamase	product inactivation	cephalosporin;cephamycin
ARO:3002133	AAG36927.1	DHA beta-lactamase	product inactivation	cephalosporin;cephamycin
ARO:3002134	AAR87489.1	DHA beta-lactamase	product inactivation	cephalosporin;cephamycin
ARO:3002135	ADT91161.1	DHA beta-lactamase	product inactivation	cephalosporin;cephamycin
ARO:3002136	ADQ00385.1	DHA beta-lactamase	product inactivation	cephalosporin;cephamycin
ARO:3002137	WP_032097955.1	DHA beta-lactamase	product inactivation	cephalosporin;cephamycin
ARO:3002138	AEL22919.1	DHA beta-lactamase	product inactivation	cephalosporin;cephamycin
ARO:3002140	AHL39320.1	DHA beta-lactamase	product inactivation	cephalosporin;cephamycin
ARO:3002141	AJO16043.1	DHA beta-lactamase	product inactivation	cephalosporin;cephamycin
ARO:3002143	CDL68900.1	DHA beta-lactamase	product inactivation	cephalosporin;cephamycin
ARO:3002144	AIT76108.1	DHA beta-lactamase	product inactivation	cephalosporin;cephamycin
ARO:3002145	AIT76107.1	DHA beta-lactamase	product inactivation	cephalosporin;cephamycin
ARO:3002146	AIT76106.1	DHA beta-lactamase	product inactivation	cephalosporin;cephamycin
ARO:3002147	AIT76105.1	DHA beta-lactamase	product inactivation	cephalosporin;cephamycin
ARO:3002148	AIT76103.1	DHA beta-lactamase	product inactivation	cephalosporin;cephamycin
ARO:3002149	AIT76094.1	DHA beta-lactamase	product inactivation	cephalosporin;cephamycin
ARO:3002150	AIT76102.1	DHA beta-lactamase	product inactivation	cephalosporin;cephamycin
ARO:3002151	AIT76101.1	DHA beta-lactamase	product inactivation	cephalosporin;cephamycin
ARO:3002152	AIT76100.1	DHA beta-lactamase	product inactivation	cephalosporin;cephamycin
ARO:3002153	AIT76109.1	DHA beta-lactamase	product inactivation	cephalosporin;cephamycin
ARO:3002154	WP_063860108.1	DHA beta-lactamase	product inactivation	cephalosporin;cephamycin
ARO:3002155	CAA54602.1	FOX beta-lactamase	product inactivation	cephalosporin;cephamycin
ARO:3002156	CAA71325.1	FOX beta-lactamase	product inactivation	cephalosporin;cephamycin
ARO:3002157	CAA71947.1	FOX beta-lactamase	product inactivation	cephalosporin;cephamycin
ARO:3002158	CAB89086.1	FOX beta-lactamase	product inactivation	cephalosporin;cephamycin
ARO:3002159	AAG12974.1	FOX beta-lactamase	product inactivation	cephalosporin;cephamycin
ARO:3002160	CAG28256.1	FOX beta-lactamase	product inactivation	cephalosporin;cephamycin
ARO:3002161	ADK73994.1	FOX beta-lactamase	product inactivation	cephalosporin;cephamycin
ARO:3002162	AGE45503.1	FOX beta-lactamase	product inactivation	cephalosporin;cephamycin
ARO:3002163	AEK78851.1	FOX beta-lactamase	product inactivation	cephalosporin;cephamycin
ARO:3002165	WP_063860495.1	FOX beta-lactamase	product inactivation	cephalosporin;cephamycin
ARO:3002166	AAD22636.1	MIR beta-lactamase	product inactivation	cephalosporin;monobactam
ARO:3002167	ABN69112.2	MIR beta-lactamase	product inactivation	cephalosporin;monobactam
ARO:3002168	AAO42602.1	MIR beta-lactamase	product inactivation	cephalosporin;monobactam
ARO:3002169	AAU95779.1	MIR beta-lactamase	product inactivation	cephalosporin;monobactam
ARO:3002170	AJO16037.1	MIR beta-lactamase	product inactivation	cephalosporin;monobactam
ARO:3002171	AFJ79785.1	MIR beta-lactamase	product inactivation	cephalosporin;monobactam
ARO:3002172	WP_045409557.1	MIR beta-lactamase	product inactivation	cephalosporin;monobactam
ARO:3002174	AIT76113.1	MIR beta-lactamase	product inactivation	cephalosporin;monobactam
ARO:3002175	AIT76111.1	MIR beta-lactamase	product inactivation	cephalosporin;monobactam
ARO:3002176	AIT76112.1	MIR beta-lactamase	product inactivation	cephalosporin;monobactam
ARO:3002177	AIT76116.1	MIR beta-lactamase	product inactivation	cephalosporin;monobactam
ARO:3002178	AIT76115.1	MIR beta-lactamase	product inactivation	cephalosporin;monobactam
ARO:3002179	AIT76117.1	MIR beta-lactamase	product inactivation	cephalosporin;monobactam
ARO:3002180	AIT76104.1	MIR beta-lactamase	product inactivation	cephalosporin;monobactam
ARO:3002181	AIT76114.1	MIR beta-lactamase	product inactivation	cephalosporin;monobactam
ARO:3002182	BAA02563.2	MOX beta-lactamase	product inactivation	cephalosporin;cephamycin;penam
ARO:3002183	CAB82578.1	MOX beta-lactamase	product inactivation	cephalosporin;cephamycin;penam
ARO:3002184	ACI89425.1	MOX beta-lactamase	product inactivation	cephalosporin;cephamycin;penam
ARO:3002185	ACS44784.1	MOX beta-lactamase	product inactivation	cephalosporin;cephamycin;penam
ARO:3002186	ACA30419.1	MOX beta-lactamase	product inactivation	cephalosporin;cephamycin;penam
ARO:3002188	ACS44783.1	MOX beta-lactamase	product inactivation	cephalosporin;cephamycin;penam
ARO:3002189	ACS44785.1	MOX beta-lactamase	product inactivation	cephalosporin;cephamycin;penam
ARO:3002190	AGH56079.1	MOX beta-lactamase	product inactivation	cephalosporin;cephamycin;penam
ARO:3002191	AIG22447.1	MOX beta-lactamase	product inactivation	cephalosporin;cephamycin;penam
ARO:3002192	CAA11471.1	IMP beta-lactamase	product inactivation	carbapenem;cephalosporin;cephamycin;penam;penem
ARO:3002193	CAB94707.1	IMP beta-lactamase	product inactivation	carbapenem;cephalosporin;cephamycin;penam;penem
ARO:3002194	BAA77393.1	IMP beta-lactamase	product inactivation	carbapenem;cephalosporin;cephamycin;penam;penem
ARO:3002195	AAK13078.1	IMP beta-lactamase	product inactivation	carbapenem;cephalosporin;cephamycin;penam;penem
ARO:3002196	AAK27847.1	IMP beta-lactamase	product inactivation	carbapenem;cephalosporin;cephamycin;penam;penem
ARO:3002197	BAB15941.1	IMP beta-lactamase	product inactivation	carbapenem;cephalosporin;cephamycin;penam;penem
ARO:3002198	AAK12087.1	IMP beta-lactamase	product inactivation	carbapenem;cephalosporin;cephamycin;penam;penem
ARO:3002199	AAK13430.1	IMP beta-lactamase	product inactivation	carbapenem;cephalosporin;cephamycin;penam;penem
ARO:3002200	AAK59385.1	IMP beta-lactamase	product inactivation	carbapenem;cephalosporin;cephamycin;penam;penem
ARO:3002201	BAB72069.1	IMP beta-lactamase	product inactivation	carbapenem;cephalosporin;cephamycin;penam;penem
ARO:3002202	BAB72072.1	IMP beta-lactamase	product inactivation	carbapenem;cephalosporin;cephamycin;penam;penem
ARO:3002203	CAD12765.1	IMP beta-lactamase	product inactivation	carbapenem;cephalosporin;cephamycin;penam;penem
ARO:3002204	CAD80251.1	IMP beta-lactamase	product inactivation	carbapenem;cephalosporin;cephamycin;penam;penem
ARO:3002205	AAT49068.1	IMP beta-lactamase	product inactivation	carbapenem;cephalosporin;cephamycin;penam;penem
ARO:3002206	AAT49070.1	IMP beta-lactamase	product inactivation	carbapenem;cephalosporin;cephamycin;penam;penem
ARO:3002207	CAE48334.1	IMP beta-lactamase	product inactivation	carbapenem;cephalosporin;cephamycin;penam;penem
ARO:3002208	WP_063860577.1	IMP beta-lactamase	product inactivation	carbapenem;cephalosporin;cephamycin;penam;penem
ARO:3002209	AEQ73520.1	IMP beta-lactamase	product inactivation	carbapenem;cephalosporin;cephamycin;penam;penem
ARO:3002210	ABM67078.1	IMP beta-lactamase	product inactivation	carbapenem;cephalosporin;cephamycin;penam;penem
ARO:3002211	BAD81061.1	IMP beta-lactamase	product inactivation	carbapenem;cephalosporin;cephamycin;penam;penem
ARO:3002212	BAD89802.1	IMP beta-lactamase	product inactivation	carbapenem;cephalosporin;cephamycin;penam;penem
ARO:3002213	ABC88434.1	IMP beta-lactamase	product inactivation	carbapenem;cephalosporin;cephamycin;penam;penem
ARO:3002214	WP_063860582.1	IMP beta-lactamase	product inactivation	carbapenem;cephalosporin;cephamycin;penam;penem
ARO:3002215	ABM68358.1	IMP beta-lactamase	product inactivation	carbapenem;cephalosporin;cephamycin;penam;penem
ARO:3002216	ACB41775.1	IMP beta-lactamase	product inactivation	carbapenem;cephalosporin;cephamycin;penam;penem
ARO:3002217	ACY01749.1	IMP beta-lactamase	product inactivation	carbapenem;cephalosporin;cephamycin;penam;penem
ARO:3002218	AEH41427.1	IMP beta-lactamase	product inactivation	carbapenem;cephalosporin;cephamycin;penam;penem
ARO:3002219	AFG73659.1	IMP beta-lactamase	product inactivation	carbapenem;cephalosporin;cephamycin;penam;penem
ARO:3002220	AFG25462.1	IMP beta-lactamase	product inactivation	carbapenem;cephalosporin;cephamycin;penam;penem
ARO:3002221	ABF70513.1	IMP beta-lactamase	product inactivation	carbapenem;cephalosporin;cephamycin;penam;penem
ARO:3002222	AGS82587.1	IMP beta-lactamase	product inactivation	carbapenem;cephalosporin;cephamycin;penam;penem
ARO:3002223	AFR33816.1	IMP beta-lactamase	product inactivation	carbapenem;cephalosporin;cephamycin;penam;penem
ARO:3002224	AEU17778.1	IMP beta-lactamase	product inactivation	carbapenem;cephalosporin;cephamycin;penam;penem
ARO:3002225	BAM38093.1	IMP beta-lactamase	product inactivation	carbapenem;cephalosporin;cephamycin;penam;penem
ARO:3002226	AFO59566.1	IMP beta-lactamase	product inactivation	carbapenem;cephalosporin;cephamycin;penam;penem
ARO:3002228	AFP97028.1	IMP beta-lactamase	product inactivation	carbapenem;cephalosporin;cephamycin;penam;penem
ARO:3002229	AEN75249.1	IMP beta-lactamase	product inactivation	carbapenem;cephalosporin;cephamycin;penam;penem
ARO:3002230	WP_136512068.1	IMP beta-lactamase	product inactivation	carbapenem;cephalosporin;cephamycin;penam;penem
ARO:3002231	BAM62794.1	IMP beta-lactamase	product inactivation	carbapenem;cephalosporin;cephamycin;penam;penem
ARO:3002232	BAM62795.1	IMP beta-lactamase	product inactivation	carbapenem;cephalosporin;cephamycin;penam;penem
ARO:3002233	BAM62793.1	IMP beta-lactamase	product inactivation	carbapenem;cephalosporin;cephamycin;penam;penem
ARO:3002234	BAM98935.1	IMP beta-lactamase	product inactivation	carbapenem;cephalosporin;cephamycin;penam;penem
ARO:3002235	BAM98942.1	IMP beta-lactamase	product inactivation	carbapenem;cephalosporin;cephamycin;penam;penem
ARO:3002236	AIA58910.1	IMP beta-lactamase	product inactivation	carbapenem;cephalosporin;cephamycin;penam;penem
ARO:3002237	WP_136512069.1	IMP beta-lactamase	product inactivation	carbapenem;cephalosporin;cephamycin;penam;penem
ARO:3002239	AIT76110.1	IMP beta-lactamase	product inactivation	carbapenem;cephalosporin;cephamycin;penam;penem
ARO:3002240	AAK96394.1	CARB beta-lactamase	product inactivation	penam
ARO:3002241	AAZ91704.1	CARB beta-lactamase	product inactivation	penam
ARO:3002242	AAB19430.2	CARB beta-lactamase	product inactivation	penam
ARO:3002243	AAC09012.1	CARB beta-lactamase	product inactivation	penam
ARO:3002244	AAF61417.1	CARB beta-lactamase	product inactivation	penam
ARO:3002245	AAD19217.1	CARB beta-lactamase	product inactivation	penam
ARO:3002246	AAM74565.1	CARB beta-lactamase	product inactivation	penam
ARO:3002247	AAO59455.1	CARB beta-lactamase	product inactivation	penam
ARO:3002248	AAP22374.1	CARB beta-lactamase	product inactivation	penam
ARO:3002249	ACJ61335.1	CARB beta-lactamase	product inactivation	penam
ARO:3002250	BAA02497.1	CARB beta-lactamase	product inactivation	penam
ARO:3002252	AFI72872.1	CARB beta-lactamase	product inactivation	penam
ARO:3002254	AIL92326.1	CARB beta-lactamase	product inactivation	penam
ARO:3002255	CCW43444.1	CARB beta-lactamase	product inactivation	penam
ARO:3002256	AAD20273.1	IND beta-lactamase	product inactivation	carbapenem
ARO:3002257	AAG29757.1	IND beta-lactamase	product inactivation	carbapenem
ARO:3002258	AAG29760.1	IND beta-lactamase	product inactivation	carbapenem
ARO:3002259	AAG29761.2	IND beta-lactamase	product inactivation	carbapenem
ARO:3002260	AAG29765.2	IND beta-lactamase	product inactivation	carbapenem
ARO:3002261	AAS78754.1	IND beta-lactamase	product inactivation	carbapenem
ARO:3002262	CAJ32373.2	IND beta-lactamase	product inactivation	carbapenem
ARO:3002263	BAJ05825.1	IND beta-lactamase	product inactivation	carbapenem
ARO:3002264	ACZ65152.1	IND beta-lactamase	product inactivation	carbapenem
ARO:3002265	ACZ65153.1	IND beta-lactamase	product inactivation	carbapenem
ARO:3002266	ADA13241.1	IND beta-lactamase	product inactivation	carbapenem
ARO:3002267	ADK25050.1	IND beta-lactamase	product inactivation	carbapenem
ARO:3002268	ADK25051.1	IND beta-lactamase	product inactivation	carbapenem
ARO:3002269	ADK38716.1	IND beta-lactamase	product inactivation	carbapenem
ARO:3002270	BAJ14288.1	IND beta-lactamase	product inactivation	carbapenem
ARO:3002271	AAN63496.1	VIM beta-lactamase	product inactivation	carbapenem;cephalosporin;cephamycin;penam;penem
ARO:3002272	ABR10840.1	VIM beta-lactamase	product inactivation	carbapenem;cephalosporin;cephamycin;penam;penem
ARO:3002273	AAG27703.1	VIM beta-lactamase	product inactivation	carbapenem;cephalosporin;cephamycin;penam;penem
ARO:3002274	CAJ32502.1	VIM beta-lactamase	product inactivation	carbapenem;cephalosporin;cephamycin;penam;penem
ARO:3002275	AAN52134.1	VIM beta-lactamase	product inactivation	carbapenem;cephalosporin;cephamycin;penam;penem
ARO:3002276	AAN84550.1	VIM beta-lactamase	product inactivation	carbapenem;cephalosporin;cephamycin;penam;penem
ARO:3002277	CAD61201.1	VIM beta-lactamase	product inactivation	carbapenem;cephalosporin;cephamycin;penam;penem
ARO:3002278	AAS13759.1	VIM beta-lactamase	product inactivation	carbapenem;cephalosporin;cephamycin;penam;penem
ARO:3002279	AAS13760.1	VIM beta-lactamase	product inactivation	carbapenem;cephalosporin;cephamycin;penam;penem
ARO:3002280	AAS13761.1	VIM beta-lactamase	product inactivation	carbapenem;cephalosporin;cephamycin;penam;penem
ARO:3002281	AAT36613.1	VIM beta-lactamase	product inactivation	carbapenem;cephalosporin;cephamycin;penam;penem
ARO:3002282	AAZ73123.1	VIM beta-lactamase	product inactivation	carbapenem;cephalosporin;cephamycin;penam;penem
ARO:3002283	ABC94518.1	VIM beta-lactamase	product inactivation	carbapenem;cephalosporin;cephamycin;penam;penem
ARO:3002284	AAT48653.1	VIM beta-lactamase	product inactivation	carbapenem;cephalosporin;cephamycin;penam;penem
ARO:3002285	ACB54702.1	VIM beta-lactamase	product inactivation	carbapenem;cephalosporin;cephamycin;penam;penem
ARO:3002286	ACB54703.1	VIM beta-lactamase	product inactivation	carbapenem;cephalosporin;cephamycin;penam;penem
ARO:3002287	ABW90721.1	VIM beta-lactamase	product inactivation	carbapenem;cephalosporin;cephamycin;penam;penem
ARO:3002288	CAO83029.1	VIM beta-lactamase	product inactivation	carbapenem;cephalosporin;cephamycin;penam;penem
ARO:3002289	ACY29468.1	VIM beta-lactamase	product inactivation	carbapenem;cephalosporin;cephamycin;penam;penem
ARO:3002290	ACV13198.1	VIM beta-lactamase	product inactivation	carbapenem;cephalosporin;cephamycin;penam;penem
ARO:3002293	ACT33323.1	VIM beta-lactamase	product inactivation	carbapenem;cephalosporin;cephamycin;penam;penem
ARO:3002294	ADL27533.1	VIM beta-lactamase	product inactivation	carbapenem;cephalosporin;cephamycin;penam;penem
ARO:3002295	ADO50679.1	VIM beta-lactamase	product inactivation	carbapenem;cephalosporin;cephamycin;penam;penem
ARO:3002296	CBY80143.1	VIM beta-lactamase	product inactivation	carbapenem;cephalosporin;cephamycin;penam;penem
ARO:3002297	ADX78234.1	VIM beta-lactamase	product inactivation	carbapenem;cephalosporin;cephamycin;penam;penem
ARO:3002298	AEI25539.1	VIM beta-lactamase	product inactivation	carbapenem;cephalosporin;cephamycin;penam;penem
ARO:3002299	AFP99885.1	VIM beta-lactamase	product inactivation	carbapenem;cephalosporin;cephamycin;penam;penem
ARO:3002300	AET05999.1	VIM beta-lactamase	product inactivation	carbapenem;cephalosporin;cephamycin;penam;penem
ARO:3002301	AFK24647.1	VIM beta-lactamase	product inactivation	carbapenem;cephalosporin;cephamycin;penam;penem
ARO:3002302	AEZ49857.1	VIM beta-lactamase	product inactivation	carbapenem;cephalosporin;cephamycin;penam;penem
ARO:3002303	AFP99175.1	VIM beta-lactamase	product inactivation	carbapenem;cephalosporin;cephamycin;penam;penem
ARO:3002304	AFN88953.1	VIM beta-lactamase	product inactivation	carbapenem;cephalosporin;cephamycin;penam;penem
ARO:3002305	AGC50805.1	VIM beta-lactamase	product inactivation	carbapenem;cephalosporin;cephamycin;penam;penem
ARO:3002306	AGC50806.1	VIM beta-lactamase	product inactivation	carbapenem;cephalosporin;cephamycin;penam;penem
ARO:3002307	AGC50807.1	VIM beta-lactamase	product inactivation	carbapenem;cephalosporin;cephamycin;penam;penem
ARO:3002308	AGE83081.2	VIM beta-lactamase	product inactivation	carbapenem;cephalosporin;cephamycin;penam;penem
ARO:3002309	AGS82586.1	VIM beta-lactamase	product inactivation	carbapenem;cephalosporin;cephamycin;penam;penem
ARO:3002310	WP_063865190.1	VIM beta-lactamase	product inactivation	carbapenem;cephalosporin;cephamycin;penam;penem
ARO:3002311	WP_063865191.1	VIM beta-lactamase	product inactivation	carbapenem;cephalosporin;cephamycin;penam;penem
ARO:3002312	AAK70220.1	KPC beta-lactamase	product inactivation	carbapenem;cephalosporin;monobactam;penam
ARO:3002313	AAL05630.1	KPC beta-lactamase	product inactivation	carbapenem;cephalosporin;monobactam;penam
ARO:3002314	ACA34343.1	KPC beta-lactamase	product inactivation	carbapenem;cephalosporin;monobactam;penam
ARO:3002315	ABY91240.1	KPC beta-lactamase	product inactivation	carbapenem;cephalosporin;monobactam;penam
ARO:3002316	ACB71165.1	KPC beta-lactamase	product inactivation	carbapenem;cephalosporin;monobactam;penam
ARO:3002317	ACE62798.1	KPC beta-lactamase	product inactivation	carbapenem;cephalosporin;monobactam;penam
ARO:3002318	ACI95258.1	KPC beta-lactamase	product inactivation	carbapenem;cephalosporin;monobactam;penam
ARO:3002319	ACM91559.1	KPC beta-lactamase	product inactivation	carbapenem;cephalosporin;monobactam;penam
ARO:3002320	ACS35345.1	KPC beta-lactamase	product inactivation	carbapenem;cephalosporin;monobactam;penam
ARO:3002321	ADH95186.1	KPC beta-lactamase	product inactivation	carbapenem;cephalosporin;monobactam;penam
ARO:3002322	ADZ75467.1	KPC beta-lactamase	product inactivation	carbapenem;cephalosporin;monobactam;penam
ARO:3002323	AEA73284.1	KPC beta-lactamase	product inactivation	carbapenem;cephalosporin;monobactam;penam
ARO:3002324	AFV48348.1	KPC beta-lactamase	product inactivation	carbapenem;cephalosporin;monobactam;penam
ARO:3002325	AGF70638.1	KPC beta-lactamase	product inactivation	carbapenem;cephalosporin;monobactam;penam
ARO:3002326	AGJ01153.1	KPC beta-lactamase	product inactivation	carbapenem;cephalosporin;monobactam;penam
ARO:3002327	AGJ01154.1	KPC beta-lactamase	product inactivation	carbapenem;cephalosporin;monobactam;penam
ARO:3002328	AKO63215.1	KPC beta-lactamase	product inactivation	carbapenem;cephalosporin;monobactam;penam
ARO:3002329	AIH07017.1	KPC beta-lactamase	product inactivation	carbapenem;cephalosporin;monobactam;penam
ARO:3002330	AAF27723.1	GES beta-lactamase	product inactivation	carbapenem;cephalosporin;penam
ARO:3002331	AAK58421.1	GES beta-lactamase	product inactivation	carbapenem;cephalosporin;penam
ARO:3002332	BAD06399.1	GES beta-lactamase	product inactivation	carbapenem;cephalosporin;penam
ARO:3002333	BAD08689.1	GES beta-lactamase	product inactivation	carbapenem;cephalosporin;penam
ARO:3002334	AAR97270.1	GES beta-lactamase	product inactivation	carbapenem;cephalosporin;penam
ARO:3002335	AAR97271.1	GES beta-lactamase	product inactivation	carbapenem;cephalosporin;penam
ARO:3002336	AAP22974.1	GES beta-lactamase	product inactivation	carbapenem;cephalosporin;penam
ARO:3002337	AAK18183.1	GES beta-lactamase	product inactivation	carbapenem;cephalosporin;penam
ARO:3002338	AAY43207.1	GES beta-lactamase	product inactivation	carbapenem;cephalosporin;penam
ARO:3002339	ACS73598.1	GES beta-lactamase	product inactivation	carbapenem;cephalosporin;penam
ARO:3002340	ACS44714.1	GES beta-lactamase	product inactivation	carbapenem;cephalosporin;penam
ARO:3002341	CBG22732.1	GES beta-lactamase	product inactivation	carbapenem;cephalosporin;penam
ARO:3002342	ACZ54536.1	GES beta-lactamase	product inactivation	carbapenem;cephalosporin;penam
ARO:3002343	ADC91899.1	GES beta-lactamase	product inactivation	carbapenem;cephalosporin;penam
ARO:3002344	ACZ98826.1	GES beta-lactamase	product inactivation	carbapenem;cephalosporin;penam
ARO:3002345	ADJ94120.1	GES beta-lactamase	product inactivation	carbapenem;cephalosporin;penam
ARO:3002346	ADZ48685.1	GES beta-lactamase	product inactivation	carbapenem;cephalosporin;penam
ARO:3002347	AEX59144.1	GES beta-lactamase	product inactivation	carbapenem;cephalosporin;penam
ARO:3002348	AEZ05107.1	GES beta-lactamase	product inactivation	carbapenem;cephalosporin;penam
ARO:3002349	AEZ05108.1	GES beta-lactamase	product inactivation	carbapenem;cephalosporin;penam
ARO:3002350	AFK80745.1	GES beta-lactamase	product inactivation	carbapenem;cephalosporin;penam
ARO:3002351	AFU25739.1	GES beta-lactamase	product inactivation	carbapenem;cephalosporin;penam
ARO:3002352	AGT20529.1	GES beta-lactamase	product inactivation	carbapenem;cephalosporin;penam
ARO:3002353	BAP75641.1	GES beta-lactamase	product inactivation	carbapenem;cephalosporin;penam
ARO:3002354	AFK80349.1	NDM beta-lactamase	product inactivation	carbapenem;cephalosporin;cephamycin;penam
ARO:3002355	AFB82585.1	NDM beta-lactamase	product inactivation	carbapenem;cephalosporin;cephamycin;penam;penem
ARO:3002356	AEX08599.1	NDM beta-lactamase	product inactivation	carbapenem;cephalosporin;cephamycin;penam
ARO:3002357	AFQ31613.1	NDM beta-lactamase	product inactivation	carbapenem;cephalosporin;cephamycin;penam
ARO:3002358	BAM84089.1	NDM beta-lactamase	product inactivation	carbapenem;cephalosporin;cephamycin;penam
ARO:3002359	AGU91756.1	NDM beta-lactamase	product inactivation	carbapenem;cephalosporin;cephamycin;penam
ARO:3002360	AGT37351.1	NDM beta-lactamase	product inactivation	carbapenem;cephalosporin;cephamycin;penam
ARO:3002361	AJE61443.1	NDM beta-lactamase	product inactivation	carbapenem;cephalosporin;cephamycin;penam
ARO:3002362	BAO79439.1	NDM beta-lactamase	product inactivation	carbapenem;cephalosporin;cephamycin;penam
ARO:3002363	CAA79968.1	PER beta-lactamase	product inactivation	carbapenem;cephalosporin;monobactam;penam;penem
ARO:3002364	CAA63714.1	PER beta-lactamase	product inactivation	carbapenem;cephalosporin;monobactam;penam;penem
ARO:3002365	AAU89132.1	PER beta-lactamase	product inactivation	carbapenem;cephalosporin;monobactam;penam;penem
ARO:3002366	ACE77058.1	PER beta-lactamase	product inactivation	carbapenem;cephalosporin;monobactam;penam;penem
ARO:3002367	WP_063864594.1	PER beta-lactamase	product inactivation	carbapenem;cephalosporin;monobactam;penam;penem
ARO:3002368	ADD80743.1	PER beta-lactamase	product inactivation	carbapenem;cephalosporin;monobactam;penam;penem
ARO:3002369	AEI54993.1	PER beta-lactamase	product inactivation	carbapenem;cephalosporin;monobactam;penam;penem
ARO:3002370	CAM88398.1	VEB beta-lactamase	product inactivation	cephalosporin;monobactam
ARO:3002371	AAK29174.1	VEB beta-lactamase	product inactivation	cephalosporin;monobactam
ARO:3002372	AAS48620.1	VEB beta-lactamase	product inactivation	cephalosporin;monobactam
ARO:3002373	ABM54868.1	VEB beta-lactamase	product inactivation	cephalosporin;monobactam
ARO:3002374	ACA34904.1	VEB beta-lactamase	product inactivation	cephalosporin;monobactam
ARO:3002375	ABN80430.1	VEB beta-lactamase	product inactivation	cephalosporin;monobactam
ARO:3002376	ACO56763.1	VEB beta-lactamase	product inactivation	cephalosporin;monobactam
ARO:3002377	AGH33739.1	VEB beta-lactamase	product inactivation	cephalosporin;monobactam
ARO:3002378	AAK14293.1	VEB beta-lactamase	product inactivation	cephalosporin;monobactam
ARO:3002379	CAA82281.1	SME beta-lactamase	product inactivation	carbapenem
ARO:3002380	AAG29813.1	SME beta-lactamase	product inactivation	carbapenem
ARO:3002381	AAS92558.1	SME beta-lactamase	product inactivation	carbapenem
ARO:3002382	AHA49908.1	SME beta-lactamase	product inactivation	carbapenem
ARO:3002383	AHV85514.1	SME beta-lactamase	product inactivation	carbapenem
ARO:3002385	AAZ04368.1	BEL beta-lactamase	product inactivation	cephalosporin;monobactam;penam
ARO:3002386	ACV69996.1	BEL beta-lactamase	product inactivation	cephalosporin;monobactam;penam
ARO:3002387	ACT09140.1	BEL beta-lactamase	product inactivation	cephalosporin;monobactam;penam
ARO:3002389	CAA82916.1	OXY beta-lactamase	product inactivation	cephalosporin;monobactam;penam
ARO:3002390	CAI43413.1	OXY beta-lactamase	product inactivation	cephalosporin;monobactam;penam
ARO:3002391	AAL78275.1	OXY beta-lactamase	product inactivation	cephalosporin;monobactam;penam
ARO:3002392	AAL78276.1	OXY beta-lactamase	product inactivation	cephalosporin;monobactam;penam
ARO:3002394	CAB42615.1	OXY beta-lactamase	product inactivation	cephalosporin;monobactam;penam
ARO:3002396	CAI43414.1	OXY beta-lactamase	product inactivation	cephalosporin;monobactam;penam
ARO:3002397	AAL79541.1	OXY beta-lactamase	product inactivation	cephalosporin;monobactam;penam
ARO:3002398	AAL78281.2	OXY beta-lactamase	product inactivation	cephalosporin;monobactam;penam
ARO:3002399	CAB42614.1	OXY beta-lactamase	product inactivation	cephalosporin;monobactam;penam
ARO:3002400	CAG34107.1	OXY beta-lactamase	product inactivation	cephalosporin;monobactam;penam
ARO:3002401	AAL78278.2	OXY beta-lactamase	product inactivation	cephalosporin;monobactam;penam
ARO:3002402	CAA88908.1	OXY beta-lactamase	product inactivation	cephalosporin;monobactam;penam
ARO:3002403	AAL17873.1	OXY beta-lactamase	product inactivation	cephalosporin;monobactam;penam
ARO:3002404	ACV44455.1	OXY beta-lactamase	product inactivation	cephalosporin;monobactam;penam
ARO:3002405	ACV44456.1	OXY beta-lactamase	product inactivation	cephalosporin;monobactam;penam
ARO:3002406	WP_004111091.1	OXY beta-lactamase	product inactivation	cephalosporin;monobactam;penam
ARO:3002407	WP_063864548.1	OXY beta-lactamase	product inactivation	cephalosporin;monobactam;penam
ARO:3002408	WP_063864549.1	OXY beta-lactamase	product inactivation	cephalosporin;monobactam;penam
ARO:3002409	AAN28732.1	OXY beta-lactamase	product inactivation	cephalosporin;monobactam;penam
ARO:3002410	AAL78161.1	OXY beta-lactamase	product inactivation	cephalosporin;monobactam;penam
ARO:3002411	CAI43417.1	OXY beta-lactamase	product inactivation	cephalosporin;monobactam;penam
ARO:3002412	CAI43419.1	OXY beta-lactamase	product inactivation	cephalosporin;monobactam;penam
ARO:3002413	CAI43422.1	OXY beta-lactamase	product inactivation	cephalosporin;monobactam;penam
ARO:3002414	CAI43423.1	OXY beta-lactamase	product inactivation	cephalosporin;monobactam;penam
ARO:3002415	CAI43424.1	OXY beta-lactamase	product inactivation	cephalosporin;monobactam;penam
ARO:3002416	CAI43425.1	OXY beta-lactamase	product inactivation	cephalosporin;monobactam;penam
ARO:3002418	CAG25812.2	OKP beta-lactamase	product inactivation	cephalosporin;penam
ARO:3002419	CAG25815.2	OKP beta-lactamase	product inactivation	cephalosporin;penam
ARO:3002420	CAJ19599.1	OKP beta-lactamase	product inactivation	cephalosporin;penam
ARO:3002421	CAJ19601.1	OKP beta-lactamase	product inactivation	cephalosporin;penam
ARO:3002422	CAJ19602.1	OKP beta-lactamase	product inactivation	cephalosporin;penam
ARO:3002423	CAJ19603.1	OKP beta-lactamase	product inactivation	cephalosporin;penam
ARO:3002424	CAJ19605.1	OKP beta-lactamase	product inactivation	cephalosporin;penam
ARO:3002425	CAJ19606.1	OKP beta-lactamase	product inactivation	cephalosporin;penam
ARO:3002426	CAJ19607.1	OKP beta-lactamase	product inactivation	cephalosporin;penam
ARO:3002427	CAJ19608.1	OKP beta-lactamase	product inactivation	cephalosporin;penam
ARO:3002428	CAP12353.2	OKP beta-lactamase	product inactivation	cephalosporin;penam
ARO:3002429	CAP12354.2	OKP beta-lactamase	product inactivation	cephalosporin;penam
ARO:3002430	ACL68096.1	OKP beta-lactamase	product inactivation	cephalosporin;penam
ARO:3002431	ACL68095.1	OKP beta-lactamase	product inactivation	cephalosporin;penam
ARO:3002432	ACN65419.1	OKP beta-lactamase	product inactivation	cephalosporin;penam
ARO:3002433	ACN65418.1	OKP beta-lactamase	product inactivation	cephalosporin;penam
ARO:3002434	CAG25813.2	OKP beta-lactamase	product inactivation	cephalosporin;penam
ARO:3002435	CAJ19610.1	OKP beta-lactamase	product inactivation	cephalosporin;penam
ARO:3002436	CAJ19611.1	OKP beta-lactamase	product inactivation	cephalosporin;penam
ARO:3002437	CAJ19612.1	OKP beta-lactamase	product inactivation	cephalosporin;penam
ARO:3002438	CAP12356.2	OKP beta-lactamase	product inactivation	cephalosporin;penam
ARO:3002439	CAP12355.2	OKP beta-lactamase	product inactivation	cephalosporin;penam
ARO:3002440	CAJ19615.1	OKP beta-lactamase	product inactivation	cephalosporin;penam
ARO:3002441	CAJ19616.1	OKP beta-lactamase	product inactivation	cephalosporin;penam
ARO:3002442	CAJ19618.1	OKP beta-lactamase	product inactivation	cephalosporin;penam
ARO:3002443	CAJ19619.1	OKP beta-lactamase	product inactivation	cephalosporin;penam
ARO:3002444	CAJ19620.1	OKP beta-lactamase	product inactivation	cephalosporin;penam
ARO:3002445	CAG25831.1	OKP beta-lactamase	product inactivation	cephalosporin;penam
ARO:3002446	AAV80715.1	OKP beta-lactamase	product inactivation	cephalosporin;penam
ARO:3002450	CAP12357.2	OKP beta-lactamase	product inactivation	cephalosporin;penam
ARO:3002451	CAP12358.1	OKP beta-lactamase	product inactivation	cephalosporin;penam
ARO:3002452	CAP12359.2	OKP beta-lactamase	product inactivation	cephalosporin;penam
ARO:3002453	CAP12360.2	OKP beta-lactamase	product inactivation	cephalosporin;penam
ARO:3002454	CAA28198.1	LEN beta-lactamase	product inactivation	penam;penem
ARO:3002455	AAK69830.1	LEN beta-lactamase	product inactivation	penam;penem
ARO:3002456	AAU25807.1	LEN beta-lactamase	product inactivation	penam;penem
ARO:3002457	CTQ11867.1	LEN beta-lactamase	product inactivation	penam;penem
ARO:3002458	CEP30258.1	LEN beta-lactamase	product inactivation	penam;penem
ARO:3002459	AXA30439.1	LEN beta-lactamase	product inactivation	penam;penem
ARO:3002460	CDA01504.1	LEN beta-lactamase	product inactivation	penam;penem
ARO:3002461	SAU22663.1	LEN beta-lactamase	product inactivation	penam;penem
ARO:3002462	PXK69226.1	LEN beta-lactamase	product inactivation	penam;penem
ARO:3002463	ADC58623.1	LEN beta-lactamase	product inactivation	penam;penem
ARO:3002464	AAU89706.1	LEN beta-lactamase	product inactivation	penam;penem
ARO:3002465	CAP12346.2	LEN beta-lactamase	product inactivation	penam;penem
ARO:3002466	CAP12347.2	LEN beta-lactamase	product inactivation	penam;penem
ARO:3002467	CAP12348.2	LEN beta-lactamase	product inactivation	penam;penem
ARO:3002468	CAP12349.2	LEN beta-lactamase	product inactivation	penam;penem
ARO:3002469	CAP12350.2	LEN beta-lactamase	product inactivation	penam;penem
ARO:3002470	CAP12351.2	LEN beta-lactamase	product inactivation	penam;penem
ARO:3002471	CAP12352.2	LEN beta-lactamase	product inactivation	penam;penem
ARO:3002472	AAN05031.1	LEN beta-lactamase	product inactivation	penam;penem
ARO:3002473	AAZ79401.1	LEN beta-lactamase	product inactivation	penam;penem
ARO:3002474	AGB34168.1	LEN beta-lactamase	product inactivation	penam;penem
ARO:3002475	AAN05030.1	LEN beta-lactamase	product inactivation	penam;penem
ARO:3002476	AAP93848.1	LEN beta-lactamase	product inactivation	penam;penem
ARO:3002477	AAP93847.1	LEN beta-lactamase	product inactivation	penam;penem
ARO:3002478	AAL50725.1	LEN beta-lactamase	product inactivation	penam;penem
ARO:3002479	ADW77562.1	LEN beta-lactamase	product inactivation	penam;penem
ARO:3002480	ACY56711.1	OXA beta-lactamase	product inactivation	carbapenem;cephalosporin;penam
ARO:3002481	AAC09015.1	AER beta-lactamase	product inactivation	penam
ARO:3002482	ACH58980.1	class A LRA beta-lactamase	product inactivation	cephalosporin;penam
ARO:3002483	ACH59002.1	class A LRA beta-lactamase	product inactivation	cephalosporin;penam
ARO:3002484	ACH58991.1	class C LRA beta-lactamase;class D LRA beta-lactamase	product inactivation	cephalosporin;penam
ARO:3002485	ACH58985.1	subclass B3 LRA beta-lactamase	product inactivation	cephalosporin;penam
ARO:3002486	ACH58998.1	subclass B3 LRA beta-lactamase	product inactivation	cephalosporin;penam
ARO:3002487	ACH58988.1	subclass B3 LRA beta-lactamase	product inactivation	cephalosporin;penam
ARO:3002488	ACH58989.1	subclass B3 LRA beta-lactamase	product inactivation	cephalosporin;penam
ARO:3002489	ACH58999.1	class C LRA beta-lactamase	product inactivation	cephalosporin;penam
ARO:3002492	ACH58997.1	class C LRA beta-lactamase	product inactivation	cephalosporin;penam
ARO:3002493	BAA23130.1	SRT beta-lactamase	product inactivation	cephalosporin
ARO:3002494	AAS07017.3	SRT beta-lactamase	product inactivation	cephalosporin
ARO:3002495	ACI29347.1	CTX-M beta-lactamase	product inactivation	cephalosporin
ARO:3002496	AIN56719.1	OXA beta-lactamase	product inactivation	carbapenem;cephalosporin;penam
ARO:3002497	ACQ82807.1	PDC beta-lactamase	product inactivation	carbapenem;cephalosporin;monobactam
ARO:3002498	ACQ82806.1	PDC beta-lactamase	product inactivation	carbapenem;cephalosporin;monobactam
ARO:3002500	ACQ82808.1	PDC beta-lactamase	product inactivation	carbapenem;cephalosporin;cephamycin;monobactam;penam
ARO:3002501	ACQ82809.1	PDC beta-lactamase	product inactivation	carbapenem;cephalosporin;monobactam
ARO:3002502	ACQ82810.1	PDC beta-lactamase	product inactivation	carbapenem;cephalosporin;cephamycin;monobactam;penam
ARO:3002505	ACQ82811.1	PDC beta-lactamase	product inactivation	carbapenem;cephalosporin;monobactam
ARO:3002506	ACQ82812.1	PDC beta-lactamase	product inactivation	carbapenem;cephalosporin;monobactam
ARO:3002507	ACQ82813.1	PDC beta-lactamase	product inactivation	carbapenem;cephalosporin;monobactam
ARO:3002508	ACQ82814.1	PDC beta-lactamase	product inactivation	carbapenem;cephalosporin;monobactam
ARO:3002509	ACQ82815.1	PDC beta-lactamase	product inactivation	carbapenem;cephalosporin;monobactam
ARO:3002510	ACH58987.1	subclass B3 LRA beta-lactamase	product inactivation	cephalosporin;penam
ARO:3002511	ACH58990.1	subclass B3 LRA beta-lactamase	product inactivation	cephalosporin;penam
ARO:3002512	ACH58994.1	subclass B3 LRA beta-lactamase	product inactivation	cephalosporin;penam
ARO:3002513	ACH59005.1	subclass B3 LRA beta-lactamase	product inactivation	cephalosporin;penam
ARO:3002514	CAC04522.1	OCH beta-lactamase	product inactivation	cephalosporin;cephamycin;monobactam;penam;penem
ARO:3002515	CAC17622.1	OCH beta-lactamase	product inactivation	cephalosporin;cephamycin;monobactam;penam;penem
ARO:3002516	CAC17623.1	OCH beta-lactamase	product inactivation	cephalosporin;cephamycin;monobactam;penam;penem
ARO:3002517	CAC17624.1	OCH beta-lactamase	product inactivation	cephalosporin;cephamycin;monobactam;penam;penem
ARO:3002518	CAC17625.1	OCH beta-lactamase	product inactivation	cephalosporin;cephamycin;monobactam;penam;penem
ARO:3002519	CAC17626.1	OCH beta-lactamase	product inactivation	cephalosporin;cephamycin;monobactam;penam;penem
ARO:3002520	CAC17627.1	OCH beta-lactamase	product inactivation	cephalosporin;cephamycin;monobactam;penam;penem
ARO:3002521	ABF50909.1	OCH beta-lactamase	product inactivation	cephalosporin;cephamycin;monobactam;penam;penem
ARO:3002522	AAF67494.2	ATP-binding cassette (ABC) antibiotic efflux pump	efflux pump	aminocoumarin antibiotic
ARO:3002523	AAA03550.1	AAC(2')	product inactivation	aminoglycoside antibiotic
ARO:3002524	AAC44793.1	AAC(2')	product inactivation	aminoglycoside antibiotic
ARO:3002525	CCP42991.1	AAC(2')	product inactivation	aminoglycoside antibiotic
ARO:3002526	AAB41701.1	AAC(2')	product inactivation	aminoglycoside antibiotic
ARO:3002527	CAC32082.1	AAC(2')	product inactivation	aminoglycoside antibiotic
ARO:3002528	AAG15269.1	AAC(3)	product inactivation	aminoglycoside antibiotic
ARO:3002529	AAR21614.1	AAC(3)	product inactivation	aminoglycoside antibiotic
ARO:3002530	AAA88422.1	AAC(3)	product inactivation	aminoglycoside antibiotic
ARO:3002531	CAD53575.1	AAC(3)	product inactivation	aminoglycoside antibiotic
ARO:3002533	CAA31895.1	AAC(3)	product inactivation	aminoglycoside antibiotic
ARO:3002534	AAA26548.1	AAC(3)	product inactivation	aminoglycoside antibiotic
ARO:3002535	CAA38525.1	AAC(3)	product inactivation	aminoglycoside antibiotic
ARO:3002536	CAA39184.1	AAC(3)	product inactivation	aminoglycoside antibiotic
ARO:3002537	KSC15183.1	AAC(3)	product inactivation	aminoglycoside antibiotic
ARO:3002538	AAA25683.1	AAC(3)	product inactivation	aminoglycoside antibiotic
ARO:3002539	ABB43029.1	AAC(3)	product inactivation	aminoglycoside antibiotic
ARO:3002540	AAA16194.1	AAC(3)	product inactivation	aminoglycoside antibiotic
ARO:3002541	AAA88552.1	AAC(3)	product inactivation	aminoglycoside antibiotic
ARO:3002542	AAA26685.1	AAC(3)	product inactivation	aminoglycoside antibiotic
ARO:3002543	AAA25334.1	AAC(3)	product inactivation	aminoglycoside antibiotic
ARO:3002544	BAA78619.1	AAC(3)	product inactivation	aminoglycoside antibiotic
ARO:3002545	AAA98298.1	AAC(6')	product inactivation	aminoglycoside antibiotic
ARO:3002546	AFJ11384.1	AAC(6')	product inactivation	aminoglycoside antibiotic
ARO:3002547	WP_071846215.1	AAC(6')-Ib-cr	product inactivation	aminoglycoside antibiotic;fluoroquinolone antibiotic
ARO:3002549	AAA26549.1	AAC(6')	product inactivation	aminoglycoside antibiotic
ARO:3002553	CAA39038.1	AAC(6')	product inactivation	aminoglycoside antibiotic
ARO:3002554	AAA21889.1	AAC(6')	product inactivation	aminoglycoside antibiotic
ARO:3002555	AAC41391.1	AAC(6')	product inactivation	aminoglycoside antibiotic
ARO:3002556	AAB63533.1	AAC(6')	product inactivation	aminoglycoside antibiotic
ARO:3002557	AAC41392.1	AAC(6')	product inactivation	aminoglycoside antibiotic
ARO:3002558	AAA87229.1	AAC(6')	product inactivation	aminoglycoside antibiotic
ARO:3002559	CAA91010.1	AAC(6')	product inactivation	aminoglycoside antibiotic
ARO:3002560	AAC25500.1	AAC(6')	product inactivation	aminoglycoside antibiotic
ARO:3002561	AAD03490.1	AAC(6')	product inactivation	aminoglycoside antibiotic
ARO:3002562	AAD03491.1	AAC(6')	product inactivation	aminoglycoside antibiotic
ARO:3002563	BAD10948.2	AAC(6')	product inactivation	aminoglycoside antibiotic
ARO:3002564	AAD03492.1	AAC(6')	product inactivation	aminoglycoside antibiotic
ARO:3002565	AAD03493.1	AAC(6')	product inactivation	aminoglycoside antibiotic
ARO:3002566	AAD03494.1	AAC(6')	product inactivation	aminoglycoside antibiotic
ARO:3002567	AAD03495.1	AAC(6')	product inactivation	aminoglycoside antibiotic
ARO:3002568	AAD03496.1	AAC(6')	product inactivation	aminoglycoside antibiotic
ARO:3002569	AAF03531.1	AAC(6')	product inactivation	aminoglycoside antibiotic
ARO:3002570	AAD52985.1	AAC(6')	product inactivation	aminoglycoside antibiotic
ARO:3002571	AAL20537.1	AAC(6')	product inactivation	aminoglycoside antibiotic
ARO:3002572	BAD12078.1	AAC(6')	product inactivation	aminoglycoside antibiotic
ARO:3002573	BAD14386.1	AAC(6')	product inactivation	aminoglycoside antibiotic
ARO:3002574	BAH66386.1	AAC(6')	product inactivation	aminoglycoside antibiotic
ARO:3002575	ACI28880.1	AAC(6')	product inactivation	aminoglycoside antibiotic
ARO:3002576	ACS44715.1	AAC(6')	product inactivation	aminoglycoside antibiotic
ARO:3002577	AAL38577.1	AAC(6')	product inactivation	aminoglycoside antibiotic
ARO:3002578	AKN19287.1	AAC(6')	product inactivation	aminoglycoside antibiotic
ARO:3002579	AIK02012.1	AAC(6')	product inactivation	aminoglycoside antibiotic
ARO:3002580	AAD02244.1	AAC(6')	product inactivation	aminoglycoside antibiotic
ARO:3002581	AAC46343.1	AAC(6')	product inactivation	aminoglycoside antibiotic
ARO:3002582	AAN41403.1	AAC(6')	product inactivation	aminoglycoside antibiotic
ARO:3002583	WP_064190968.1	AAC(6')	product inactivation	aminoglycoside antibiotic
ARO:3002584	WP_064190969.1	AAC(6')	product inactivation	aminoglycoside antibiotic
ARO:3002585	CAK55557.1	AAC(6')	product inactivation	aminoglycoside antibiotic
ARO:3002586	ABR10839.1	AAC(6')	product inactivation	aminoglycoside antibiotic
ARO:3002587	AEZ05106.1	AAC(6')	product inactivation	aminoglycoside antibiotic
ARO:3002588	AAP43642.1	AAC(6')	product inactivation	aminoglycoside antibiotic
ARO:3002589	CAE50925.1	AAC(6')	product inactivation	aminoglycoside antibiotic
ARO:3002590	CAE50926.1	AAC(6')	product inactivation	aminoglycoside antibiotic
ARO:3002591	ABU55430.1	AAC(6')	product inactivation	aminoglycoside antibiotic
ARO:3002592	ACL37342.1	AAC(6')	product inactivation	aminoglycoside antibiotic
ARO:3002593	BAD11815.1	AAC(6')	product inactivation	aminoglycoside antibiotic
ARO:3002594	AAM92464.1	AAC(6')	product inactivation	aminoglycoside antibiotic
ARO:3002595	AAA25680.1	AAC(6')	product inactivation	aminoglycoside antibiotic
ARO:3002596	AAD46626.1	AAC(6')	product inactivation	aminoglycoside antibiotic
ARO:3002597	AAA88548.1	AAC(6');APH(2'')	product inactivation	aminoglycoside antibiotic
ARO:3002598	AAL51021.2	AAC(6');ANT(3'')	product inactivation	aminoglycoside antibiotic
ARO:3002599	CAE48335.2	AAC(6')	product inactivation	aminoglycoside antibiotic
ARO:3002600	AAL82588.1	AAC(3);AAC(6')	product inactivation	aminoglycoside antibiotic
ARO:3002601	AAO49597.1	ANT(3'')	product inactivation	aminoglycoside antibiotic
ARO:3002602	AAF27727.1	ANT(3'')	product inactivation	aminoglycoside antibiotic
ARO:3002603	AAC14728.1	ANT(3'')	product inactivation	aminoglycoside antibiotic
ARO:3002604	AAN34365.1	ANT(3'')	product inactivation	aminoglycoside antibiotic
ARO:3002605	AAF17880.1	ANT(3'')	product inactivation	aminoglycoside antibiotic
ARO:3002606	CAJ32504.1	ANT(3'')	product inactivation	aminoglycoside antibiotic
ARO:3002607	BAD00739.1	ANT(3'')	product inactivation	aminoglycoside antibiotic
ARO:3002608	AAN41439.1	ANT(3'')	product inactivation	aminoglycoside antibiotic
ARO:3002609	ABG49324.1	ANT(3'')	product inactivation	aminoglycoside antibiotic
ARO:3002611	AAV32840.1	ANT(3'')	product inactivation	aminoglycoside antibiotic
ARO:3002612	ACJ47200.1	ANT(3'')	product inactivation	aminoglycoside antibiotic
ARO:3002613	ABW91178.1	ANT(3'')	product inactivation	aminoglycoside antibiotic
ARO:3002614	CAI57696.1	ANT(3'')	product inactivation	aminoglycoside antibiotic
ARO:3002615	ABD58917.1	ANT(3'')	product inactivation	aminoglycoside antibiotic
ARO:3002616	ACF17980.1	ANT(3'')	product inactivation	aminoglycoside antibiotic
ARO:3002617	ACK43806.1	ANT(3'')	product inactivation	aminoglycoside antibiotic
ARO:3002618	AAN87151.1	ANT(3'')	product inactivation	aminoglycoside antibiotic
ARO:3002619	CAK12750.1	ANT(3'')	product inactivation	aminoglycoside antibiotic
ARO:3002620	CAH10847.1	ANT(3'')	product inactivation	aminoglycoside antibiotic
ARO:3002621	ABG72894.1	ANT(3'')	product inactivation	aminoglycoside antibiotic
ARO:3002622	CAJ32491.1	ANT(3'')	product inactivation	aminoglycoside antibiotic
ARO:3002623	AAO83986.1	ANT(4')	product inactivation	aminoglycoside antibiotic
ARO:3002624	AAA25717.1	ANT(4')	product inactivation	aminoglycoside antibiotic
ARO:3002625	AAM76670.1	ANT(4')	product inactivation	aminoglycoside antibiotic
ARO:3002626	AHE40557.1	ANT(6)	product inactivation	aminoglycoside antibiotic
ARO:3002627	CAB14620.1	ANT(6)	product inactivation	aminoglycoside antibiotic
ARO:3002628	AAU10334.1	ANT(6)	product inactivation	aminoglycoside antibiotic
ARO:3002629	CBH51824.1	ANT(6)	product inactivation	aminoglycoside antibiotic
ARO:3002630	CAA26428.1	ANT(9)	product inactivation	aminoglycoside antibiotic
ARO:3002631	AGW81558.1	ANT(9)	product inactivation	aminoglycoside antibiotic
ARO:3002634	AAX38178.1	APH(2'')	product inactivation	aminoglycoside antibiotic
ARO:3002635	AAK63040.1	APH(2'')	product inactivation	aminoglycoside antibiotic
ARO:3002636	AAB49832.1	APH(2'')	product inactivation	aminoglycoside antibiotic
ARO:3002637	AAC14693.1	APH(2'')	product inactivation	aminoglycoside antibiotic
ARO:3002638	CAA37605.1	APH(3'')	product inactivation	aminoglycoside antibiotic
ARO:3002639	ABK33456.1	APH(3'')	product inactivation	aminoglycoside antibiotic
ARO:3002640	ABC68330.1	APH(3'')	product inactivation	aminoglycoside antibiotic
ARO:3002641	CAE51638.1	APH(3')	product inactivation	aminoglycoside antibiotic
ARO:3002642	AAA26412.1	APH(3')	product inactivation	aminoglycoside antibiotic
ARO:3002644	CAA23892.1	APH(3')	product inactivation	aminoglycoside antibiotic
ARO:3002645	CAA62365.1	APH(3')	product inactivation	aminoglycoside antibiotic
ARO:3002646	ADQ43421.1	APH(3')	product inactivation	aminoglycoside antibiotic
ARO:3002647	AGV10830.1	APH(3')	product inactivation	aminoglycoside antibiotic
ARO:3002648	CAA27061.1	APH(3')	product inactivation	aminoglycoside antibiotic
ARO:3002649	AAA26699.1	APH(3')	product inactivation	aminoglycoside antibiotic
ARO:3002650	AAC32025.1	APH(3')	product inactivation	aminoglycoside antibiotic
ARO:3002651	AAB21326.1	APH(3')	product inactivation	aminoglycoside antibiotic
ARO:3002652	CAA30578.1	APH(3')	product inactivation	aminoglycoside antibiotic
ARO:3002653	CAF29483.1	APH(3')	product inactivation	aminoglycoside antibiotic
ARO:3002654	AAA76822.1	APH(3')	product inactivation	aminoglycoside antibiotic
ARO:3002655	CAA24743.1	APH(4)	product inactivation	aminoglycoside antibiotic
ARO:3002656	CAA52372.1	APH(4)	product inactivation	aminoglycoside antibiotic
ARO:3002657	CAA68516.1	APH(6)	product inactivation	aminoglycoside antibiotic
ARO:3002658	CAA29136.1	APH(6)	product inactivation	aminoglycoside antibiotic
ARO:3002659	CAA25854.1	APH(6)	product inactivation	aminoglycoside antibiotic
ARO:3002660	AAC23556.1	APH(6)	product inactivation	aminoglycoside antibiotic
ARO:3002661	CAA27276.1	APH(7'')	product inactivation	aminoglycoside antibiotic
ARO:3002662	AAB58447.1	APH(9)	product inactivation	aminoglycoside antibiotic
ARO:3002663	AAB66655.1	APH(9)	product inactivation	aminoglycoside antibiotic
ARO:3002665	BAF80809.1	16S rRNA methyltransferase (A1408)	target alteration	aminoglycoside antibiotic
ARO:3002666	AFJ11385.1	16S rRNA methyltransferase (G1405)	target alteration	aminoglycoside antibiotic
ARO:3002667	ABY64751.1	16S rRNA methyltransferase (G1405)	target alteration	aminoglycoside antibiotic
ARO:3002668	AGE00988.1	16S rRNA methyltransferase (G1405)	target alteration	aminoglycoside antibiotic
ARO:3002669	AGV10818.1	APH(2'')	product inactivation	aminoglycoside antibiotic
ARO:3002671	AAB53259.1	chloramphenicol acetyltransferase (CAT)	product inactivation	phenicol antibiotic
ARO:3002672	AAA22289.1	chloramphenicol acetyltransferase (CAT)	product inactivation	phenicol antibiotic
ARO:3002674	AAA73865.1	chloramphenicol acetyltransferase (CAT)	product inactivation	phenicol antibiotic
ARO:3002675	AAP15294.1	chloramphenicol acetyltransferase (CAT)	product inactivation	phenicol antibiotic
ARO:3002676	AFQ93498.1	chloramphenicol acetyltransferase (CAT)	product inactivation	phenicol antibiotic
ARO:3002678	CAA11473.1	chloramphenicol acetyltransferase (CAT)	product inactivation	phenicol antibiotic
ARO:3002679	NP_249397.1	chloramphenicol acetyltransferase (CAT)	product inactivation	phenicol antibiotic
ARO:3002680	AAM92461.1	chloramphenicol acetyltransferase (CAT)	product inactivation	phenicol antibiotic
ARO:3002681	AAL68645.1	chloramphenicol acetyltransferase (CAT)	product inactivation	phenicol antibiotic
ARO:3002683	CAA23899.1	chloramphenicol acetyltransferase (CAT)	product inactivation	phenicol antibiotic
ARO:3002684	CAA37806.1	chloramphenicol acetyltransferase (CAT)	product inactivation	phenicol antibiotic
ARO:3002685	CAA30695.1	chloramphenicol acetyltransferase (CAT)	product inactivation	phenicol antibiotic
ARO:3002686	AAB51421.1	chloramphenicol acetyltransferase (CAT)	product inactivation	phenicol antibiotic
ARO:3002687	AAA23215.1	chloramphenicol acetyltransferase (CAT)	product inactivation	phenicol antibiotic
ARO:3002688	CAA52904.1	chloramphenicol acetyltransferase (CAT)	product inactivation	phenicol antibiotic
ARO:3002689	BAA03718.1	chloramphenicol acetyltransferase (CAT)	product inactivation	phenicol antibiotic
ARO:3002690	CAA42594.1	major facilitator superfamily (MFS) antibiotic efflux pump	efflux pump	phenicol antibiotic
ARO:3002691	CAD31707.1	major facilitator superfamily (MFS) antibiotic efflux pump	efflux pump	phenicol antibiotic
ARO:3002693	AAA26057.1	major facilitator superfamily (MFS) antibiotic efflux pump	efflux pump	phenicol antibiotic
ARO:3002694	AAF27726.1	major facilitator superfamily (MFS) antibiotic efflux pump	efflux pump	phenicol antibiotic
ARO:3002695	AAM77075.1	major facilitator superfamily (MFS) antibiotic efflux pump	efflux pump	phenicol antibiotic
ARO:3002696	AAK52606.1	major facilitator superfamily (MFS) antibiotic efflux pump	efflux pump	phenicol antibiotic
ARO:3002698	AAD22144.1	major facilitator superfamily (MFS) antibiotic efflux pump	efflux pump	phenicol antibiotic
ARO:3002699	CAL30186.1	major facilitator superfamily (MFS) antibiotic efflux pump	efflux pump	phenicol antibiotic
ARO:3002700	AAB36568.1	chloramphenicol phosphotransferase	product inactivation	phenicol antibiotic
ARO:3002701	CAA78046.1	major facilitator superfamily (MFS) antibiotic efflux pump	efflux pump	phenicol antibiotic
ARO:3002702	AAC45805.1	major facilitator superfamily (MFS) antibiotic efflux pump	efflux pump	phenicol antibiotic
ARO:3002703	AAG03380.1	major facilitator superfamily (MFS) antibiotic efflux pump	efflux pump	phenicol antibiotic
ARO:3002704	CAD70268.1	major facilitator superfamily (MFS) antibiotic efflux pump	efflux pump	phenicol antibiotic
ARO:3002705	AAG16656.1	major facilitator superfamily (MFS) antibiotic efflux pump	efflux pump	phenicol antibiotic
ARO:3002707	ABI50486.1	quinolone resistance protein (qnr)	target protection	fluoroquinolone antibiotic
ARO:3002708	ADU33193.1	quinolone resistance protein (qnr)	target protection	fluoroquinolone antibiotic
ARO:3002709	AAZ04782.1	quinolone resistance protein (qnr)	target protection	fluoroquinolone antibiotic
ARO:3002710	AAZ04783.1	quinolone resistance protein (qnr)	target protection	fluoroquinolone antibiotic
ARO:3002711	AAZ04784.1	quinolone resistance protein (qnr)	target protection	fluoroquinolone antibiotic
ARO:3002712	AAZ78355.1	quinolone resistance protein (qnr)	target protection	fluoroquinolone antibiotic
ARO:3002713	ACV83303.2	quinolone resistance protein (qnr)	target protection	fluoroquinolone antibiotic
ARO:3002714	ABC86904.2	quinolone resistance protein (qnr)	target protection	fluoroquinolone antibiotic
ARO:3002715	ABO93588.1	quinolone resistance protein (qnr)	target protection	fluoroquinolone antibiotic
ARO:3002716	ABC17629.1	quinolone resistance protein (qnr)	target protection	fluoroquinolone antibiotic
ARO:3002718	ABC17630.2	quinolone resistance protein (qnr)	target protection	fluoroquinolone antibiotic
ARO:3002719	ABC17628.1	quinolone resistance protein (qnr)	target protection	fluoroquinolone antibiotic
ARO:3002720	ABP87778.1	quinolone resistance protein (qnr)	target protection	fluoroquinolone antibiotic
ARO:3002721	ABW03156.3	quinolone resistance protein (qnr)	target protection	fluoroquinolone antibiotic
ARO:3002722	ABW03157.2	quinolone resistance protein (qnr)	target protection	fluoroquinolone antibiotic
ARO:3002723	ABP88094.1	quinolone resistance protein (qnr)	target protection	fluoroquinolone antibiotic
ARO:3002724	ABG56269.1	quinolone resistance protein (qnr)	target protection	fluoroquinolone antibiotic
ARO:3002725	ABS30107.1	quinolone resistance protein (qnr)	target protection	fluoroquinolone antibiotic
ARO:3002726	CAO82104.1	quinolone resistance protein (qnr)	target protection	fluoroquinolone antibiotic
ARO:3002727	ABX72042.1	quinolone resistance protein (qnr)	target protection	fluoroquinolone antibiotic
ARO:3002728	ABX72044.1	quinolone resistance protein (qnr)	target protection	fluoroquinolone antibiotic
ARO:3002730	ABX72227.1	quinolone resistance protein (qnr)	target protection	fluoroquinolone antibiotic
ARO:3002731	ABV66096.1	quinolone resistance protein (qnr)	target protection	fluoroquinolone antibiotic
ARO:3002732	CAP45902.1	quinolone resistance protein (qnr)	target protection	fluoroquinolone antibiotic
ARO:3002733	CAP45903.1	quinolone resistance protein (qnr)	target protection	fluoroquinolone antibiotic
ARO:3002734	AGK90303.1	quinolone resistance protein (qnr)	target protection	fluoroquinolone antibiotic
ARO:3002735	BAG55487.1	quinolone resistance protein (qnr)	target protection	fluoroquinolone antibiotic
ARO:3002736	ACM50952.1	quinolone resistance protein (qnr)	target protection	fluoroquinolone antibiotic
ARO:3002737	ACS71746.1	quinolone resistance protein (qnr)	target protection	fluoroquinolone antibiotic
ARO:3002738	ACS71747.1	quinolone resistance protein (qnr)	target protection	fluoroquinolone antibiotic
ARO:3002739	ADI46626.1	quinolone resistance protein (qnr)	target protection	fluoroquinolone antibiotic
ARO:3002740	ADN94685.1	quinolone resistance protein (qnr)	target protection	fluoroquinolone antibiotic
ARO:3002741	AEH59666.1	quinolone resistance protein (qnr)	target protection	fluoroquinolone antibiotic
ARO:3002742	ADM52186.1	quinolone resistance protein (qnr)	target protection	fluoroquinolone antibiotic
ARO:3002743	ADM52188.1	quinolone resistance protein (qnr)	target protection	fluoroquinolone antibiotic
ARO:3002744	ADM52193.1	quinolone resistance protein (qnr)	target protection	fluoroquinolone antibiotic
ARO:3002745	ADM52194.1	quinolone resistance protein (qnr)	target protection	fluoroquinolone antibiotic
ARO:3002746	ADQ43424.1	quinolone resistance protein (qnr)	target protection	fluoroquinolone antibiotic
ARO:3002747	AEL00450.1	quinolone resistance protein (qnr)	target protection	fluoroquinolone antibiotic
ARO:3002748	AEL00451.1	quinolone resistance protein (qnr)	target protection	fluoroquinolone antibiotic
ARO:3002749	AEL00452.1	quinolone resistance protein (qnr)	target protection	fluoroquinolone antibiotic
ARO:3002750	AEL00456.1	quinolone resistance protein (qnr)	target protection	fluoroquinolone antibiotic
ARO:3002751	AEL00458.1	quinolone resistance protein (qnr)	target protection	fluoroquinolone antibiotic
ARO:3002752	AEL00459.1	quinolone resistance protein (qnr)	target protection	fluoroquinolone antibiotic
ARO:3002753	AEL00461.1	quinolone resistance protein (qnr)	target protection	fluoroquinolone antibiotic
ARO:3002755	WP_063866081.1	quinolone resistance protein (qnr)	target protection	fluoroquinolone antibiotic
ARO:3002756	AEL31272.1	quinolone resistance protein (qnr)	target protection	fluoroquinolone antibiotic
ARO:3002757	AEQ94272.1	quinolone resistance protein (qnr)	target protection	fluoroquinolone antibiotic
ARO:3002758	WP_063866099.1	quinolone resistance protein (qnr)	target protection	fluoroquinolone antibiotic
ARO:3002759	WP_063866105.1	quinolone resistance protein (qnr)	target protection	fluoroquinolone antibiotic
ARO:3002760	WP_063866109.1	quinolone resistance protein (qnr)	target protection	fluoroquinolone antibiotic
ARO:3002761	ADW54092.1	quinolone resistance protein (qnr)	target protection	fluoroquinolone antibiotic
ARO:3002762	AFU25658.1	quinolone resistance protein (qnr)	target protection	fluoroquinolone antibiotic
ARO:3002763	AFH88686.1	quinolone resistance protein (qnr)	target protection	fluoroquinolone antibiotic
ARO:3002764	AFD54601.1	quinolone resistance protein (qnr)	target protection	fluoroquinolone antibiotic
ARO:3002765	AFU25656.1	quinolone resistance protein (qnr)	target protection	fluoroquinolone antibiotic
ARO:3002767	CCI51002.2	quinolone resistance protein (qnr)	target protection	fluoroquinolone antibiotic
ARO:3002768	AHE41343.1	quinolone resistance protein (qnr)	target protection	fluoroquinolone antibiotic
ARO:3002769	AFR46587.1	quinolone resistance protein (qnr)	target protection	fluoroquinolone antibiotic
ARO:3002770	AFR46588.1	quinolone resistance protein (qnr)	target protection	fluoroquinolone antibiotic
ARO:3002771	AFR46589.1	quinolone resistance protein (qnr)	target protection	fluoroquinolone antibiotic
ARO:3002772	AFR46590.1	quinolone resistance protein (qnr)	target protection	fluoroquinolone antibiotic
ARO:3002773	BAN04743.1	quinolone resistance protein (qnr)	target protection	fluoroquinolone antibiotic
ARO:3002774	BAN04737.1	quinolone resistance protein (qnr)	target protection	fluoroquinolone antibiotic
ARO:3002775	AFY16910.1	quinolone resistance protein (qnr)	target protection	fluoroquinolone antibiotic
ARO:3002776	AGL43625.1	quinolone resistance protein (qnr)	target protection	fluoroquinolone antibiotic
ARO:3002777	AGL43626.1	quinolone resistance protein (qnr)	target protection	fluoroquinolone antibiotic
ARO:3002778	AGL43627.1	quinolone resistance protein (qnr)	target protection	fluoroquinolone antibiotic
ARO:3002779	AGL43628.1	quinolone resistance protein (qnr)	target protection	fluoroquinolone antibiotic
ARO:3002780	AGL43629.1	quinolone resistance protein (qnr)	target protection	fluoroquinolone antibiotic
ARO:3002781	AGL43630.1	quinolone resistance protein (qnr)	target protection	fluoroquinolone antibiotic
ARO:3002782	AGL43631.1	quinolone resistance protein (qnr)	target protection	fluoroquinolone antibiotic
ARO:3002783	AGL43632.1	quinolone resistance protein (qnr)	target protection	fluoroquinolone antibiotic
ARO:3002784	AGN92479.1	quinolone resistance protein (qnr)	target protection	fluoroquinolone antibiotic
ARO:3002785	AGT59159.1	quinolone resistance protein (qnr)	target protection	fluoroquinolone antibiotic
ARO:3002786	AHX97725.1	quinolone resistance protein (qnr)	target protection	fluoroquinolone antibiotic
ARO:3002787	ACK75961.1	quinolone resistance protein (qnr)	target protection	fluoroquinolone antibiotic
ARO:3002788	ACG70184.1	quinolone resistance protein (qnr)	target protection	fluoroquinolone antibiotic
ARO:3002789	AHY03238.1	quinolone resistance protein (qnr)	target protection	fluoroquinolone antibiotic
ARO:3002790	ABF47469.1	quinolone resistance protein (qnr)	target protection	fluoroquinolone antibiotic
ARO:3002791	ABF47470.1	quinolone resistance protein (qnr)	target protection	fluoroquinolone antibiotic
ARO:3002792	ABU52984.1	quinolone resistance protein (qnr)	target protection	fluoroquinolone antibiotic
ARO:3002793	ACJ24509.1	quinolone resistance protein (qnr)	target protection	fluoroquinolone antibiotic
ARO:3002794	AEG74319.1	quinolone resistance protein (qnr)	target protection	fluoroquinolone antibiotic
ARO:3002795	AEG74318.1	quinolone resistance protein (qnr)	target protection	fluoroquinolone antibiotic
ARO:3002796	AHE41344.1	quinolone resistance protein (qnr)	target protection	fluoroquinolone antibiotic
ARO:3002797	AHE41345.1	quinolone resistance protein (qnr)	target protection	fluoroquinolone antibiotic
ARO:3002798	AHF20043.1	quinolone resistance protein (qnr)	target protection	fluoroquinolone antibiotic
ARO:3002799	ACC54440.2	quinolone resistance protein (qnr)	target protection	fluoroquinolone antibiotic
ARO:3002800	ADI81040.1	quinolone resistance protein (qnr)	target protection	fluoroquinolone antibiotic
ARO:3002801	ADI55014.1	quinolone resistance protein (qnr)	target protection	fluoroquinolone antibiotic
ARO:3002802	AEM62764.1	quinolone resistance protein (qnr)	target protection	fluoroquinolone antibiotic
ARO:3002803	AGH08253.1	quinolone resistance protein (qnr)	target protection	fluoroquinolone antibiotic
ARO:3002804	ACC85616.1	fosfomycin thiol transferase	product inactivation	fosfomycin
ARO:3002812	BAA07072.1	major facilitator superfamily (MFS) antibiotic efflux pump	efflux pump	phenicol antibiotic
ARO:3002813	KIX81495.1	ATP-binding cassette (ABC) antibiotic efflux pump	efflux pump	lincosamide antibiotic
ARO:3002814	AGZ55247.1	Cfr 23S ribosomal RNA methyltransferase	target alteration	lincosamide antibiotic;oxazolidinone antibiotic;phenicol antibiotic;pleuromutilin antibiotic;streptogramin antibiotic
ARO:3002815	BAH45481.1	Cfr 23S ribosomal RNA methyltransferase	target alteration	lincosamide antibiotic;oxazolidinone antibiotic;phenicol antibiotic;pleuromutilin antibiotic;streptogramin antibiotic
ARO:3002816	BAD63613.1	Cfr 23S ribosomal RNA methyltransferase	target alteration	lincosamide antibiotic;oxazolidinone antibiotic;phenicol antibiotic;pleuromutilin antibiotic;streptogramin antibiotic
ARO:3002817	AAC32027.1	ABC-F ATP-binding cassette ribosomal protection protein	target protection	lincosamide antibiotic;macrolide antibiotic;oxazolidinone antibiotic;phenicol antibiotic;pleuromutilin antibiotic;streptogramin antibiotic;tetracycline antibiotic
ARO:3002819	AAK01167.1	ABC-F ATP-binding cassette ribosomal protection protein	target protection	lincosamide antibiotic;macrolide antibiotic;oxazolidinone antibiotic;phenicol antibiotic;pleuromutilin antibiotic;streptogramin antibiotic;tetracycline antibiotic
ARO:3002823	AAC32026.1	Erm 23S ribosomal RNA methyltransferase	target alteration	lincosamide antibiotic;macrolide antibiotic;streptogramin antibiotic
ARO:3002824	AAB51440.1	Erm 23S ribosomal RNA methyltransferase	target alteration	lincosamide antibiotic;macrolide antibiotic;streptogramin antibiotic
ARO:3002825	BAB20748.1	Erm 23S ribosomal RNA methyltransferase	target alteration	lincosamide antibiotic;macrolide antibiotic;streptogramin antibiotic
ARO:3002826	AAC78336.1	macrolide esterase	product inactivation	macrolide antibiotic
ARO:3002827	AAA26832.1	ABC-F ATP-binding cassette ribosomal protection protein	target protection	lincosamide antibiotic;macrolide antibiotic;oxazolidinone antibiotic;phenicol antibiotic;pleuromutilin antibiotic;streptogramin antibiotic;tetracycline antibiotic
ARO:3002828	CAA45050.1	ABC-F ATP-binding cassette ribosomal protection protein	target protection	lincosamide antibiotic;macrolide antibiotic;oxazolidinone antibiotic;phenicol antibiotic;pleuromutilin antibiotic;streptogramin antibiotic;tetracycline antibiotic
ARO:3002829	AAA26684.1	ABC-F ATP-binding cassette ribosomal protection protein	target protection	lincosamide antibiotic;macrolide antibiotic;oxazolidinone antibiotic;phenicol antibiotic;pleuromutilin antibiotic;streptogramin antibiotic;tetracycline antibiotic
ARO:3002830	ABH10964.1	ABC-F ATP-binding cassette ribosomal protection protein	target protection	lincosamide antibiotic;macrolide antibiotic;oxazolidinone antibiotic;phenicol antibiotic;pleuromutilin antibiotic;streptogramin antibiotic;tetracycline antibiotic
ARO:3002831	CBL58195.1	ABC-F ATP-binding cassette ribosomal protection protein	target protection	lincosamide antibiotic;macrolide antibiotic;oxazolidinone antibiotic;phenicol antibiotic;pleuromutilin antibiotic;streptogramin antibiotic;tetracycline antibiotic
ARO:3002832	ACX92986.2	ABC-F ATP-binding cassette ribosomal protection protein	target protection	lincosamide antibiotic;macrolide antibiotic;oxazolidinone antibiotic;phenicol antibiotic;pleuromutilin antibiotic;streptogramin antibiotic;tetracycline antibiotic
ARO:3002833	CBY88983.1	ABC-F ATP-binding cassette ribosomal protection protein	target protection	lincosamide antibiotic;macrolide antibiotic;oxazolidinone antibiotic;phenicol antibiotic;pleuromutilin antibiotic;streptogramin antibiotic;tetracycline antibiotic
ARO:3002835	AAA26652.1	lincosamide nucleotidyltransferase (LNU)	product inactivation	lincosamide antibiotic
ARO:3002836	CAB41414.1	lincosamide nucleotidyltransferase (LNU)	product inactivation	lincosamide antibiotic
ARO:3002837	AAY32951.1	lincosamide nucleotidyltransferase (LNU)	product inactivation	lincosamide antibiotic
ARO:3002838	ABR14060.1	lincosamide nucleotidyltransferase (LNU)	product inactivation	lincosamide antibiotic
ARO:3002839	CAD91132.1	lincosamide nucleotidyltransferase (LNU)	product inactivation	lincosamide antibiotic
ARO:3002840	AAA26683.1	streptogramin vat acetyltransferase	product inactivation	streptogramin antibiotic
ARO:3002841	AAA86871.1	streptogramin vat acetyltransferase	product inactivation	streptogramin antibiotic
ARO:3002842	AAC61671.1	streptogramin vat acetyltransferase	product inactivation	streptogramin antibiotic
ARO:3002843	AAK84316.1	streptogramin vat acetyltransferase	product inactivation	streptogramin antibiotic
ARO:3002844	AAF86220.1	streptogramin vat acetyltransferase	product inactivation	streptogramin antibiotic
ARO:3002845	ACX92987.1	streptogramin vat acetyltransferase	product inactivation	streptogramin antibiotic
ARO:3002846	AAC05822.1	rifampin ADP-ribosyltransferase (Arr)	product inactivation	rifamycin antibiotic
ARO:3002847	AAC64366.1	rifampin ADP-ribosyltransferase (Arr)	product inactivation	rifamycin antibiotic
ARO:3002848	ACD56151.1	rifampin ADP-ribosyltransferase (Arr)	product inactivation	rifamycin antibiotic
ARO:3002849	ABV26705.1	rifampin ADP-ribosyltransferase (Arr)	product inactivation	rifamycin antibiotic
ARO:3002850	ABV26707.1	rifampin ADP-ribosyltransferase (Arr)	product inactivation	rifamycin antibiotic
ARO:3002852	CAZ48628.1	rifampin ADP-ribosyltransferase (Arr)	product inactivation	rifamycin antibiotic
ARO:3002853	AGC29882.1	rifampin ADP-ribosyltransferase (Arr)	product inactivation	rifamycin antibiotic
ARO:3002854	AAP74961.2	trimethoprim resistant dihydrofolate reductase dfr	target replacement	diaminopyrimidine antibiotic
ARO:3002856	CAI99385.1	trimethoprim resistant dihydrofolate reductase dfr	target replacement	diaminopyrimidine antibiotic
ARO:3002857	CAL48457.1	trimethoprim resistant dihydrofolate reductase dfr	target replacement	diaminopyrimidine antibiotic
ARO:3002858	ADG84870.1	trimethoprim resistant dihydrofolate reductase dfr	target replacement	diaminopyrimidine antibiotic
ARO:3002859	AHK10285.1	trimethoprim resistant dihydrofolate reductase dfr	target replacement	diaminopyrimidine antibiotic
ARO:3002860	ABG91835.1	trimethoprim resistant dihydrofolate reductase dfr	target replacement	diaminopyrimidine antibiotic
ARO:3002861	ABB89122.1	trimethoprim resistant dihydrofolate reductase dfr	target replacement	diaminopyrimidine antibiotic
ARO:3002862	ACS44716.1	trimethoprim resistant dihydrofolate reductase dfr	target replacement	diaminopyrimidine antibiotic
ARO:3002863	AHV80711.1	trimethoprim resistant dihydrofolate reductase dfr	target replacement	diaminopyrimidine antibiotic
ARO:3002864	AAA82255.1	trimethoprim resistant dihydrofolate reductase dfr	target replacement	diaminopyrimidine antibiotic
ARO:3002865	AAO04716.1	trimethoprim resistant dihydrofolate reductase dfr	target replacement	diaminopyrimidine antibiotic
ARO:3002866	AAA85213.1	trimethoprim resistant dihydrofolate reductase dfr	target replacement	diaminopyrimidine antibiotic
ARO:3002867	AAD01868.1	trimethoprim resistant dihydrofolate reductase dfr	target replacement	diaminopyrimidine antibiotic
ARO:3002868	BAE15963.1	trimethoprim resistant dihydrofolate reductase dfr	target replacement	diaminopyrimidine antibiotic
ARO:3002869	CBL80435.1	trimethoprim resistant dihydrofolate reductase dfr	target replacement	diaminopyrimidine antibiotic
ARO:3002871	AAN28721.1	tetracycline inactivation enzyme	product inactivation	tetracycline antibiotic
ARO:3002872	AEG78825.1	fosfomycin thiol transferase	product inactivation	fosfomycin
ARO:3002873	ADX95999.1	fosfomycin thiol transferase	product inactivation	fosfomycin
ARO:3002874	BAJ10053.1	fosC phosphotransferase family	product inactivation	fosfomycin
ARO:3002875	EOD99669.1	trimethoprim resistant dihydrofolate reductase dfr	target replacement	diaminopyrimidine antibiotic
ARO:3002877	CAA29819.1	Bc beta-lactamase	product inactivation	cephalosporin;penam
ARO:3002878	AAA22562.1	Bc beta-lactamase	product inactivation	cephalosporin;penam
ARO:3002879	ABG65740.1	lincosamide nucleotidyltransferase (LNU)	product inactivation	lincosamide antibiotic
ARO:3002881	ABX00624.1	ABC-F ATP-binding cassette ribosomal protection protein	target protection	lincosamide antibiotic;macrolide antibiotic;oxazolidinone antibiotic;phenicol antibiotic;pleuromutilin antibiotic;streptogramin antibiotic;tetracycline antibiotic
ARO:3002882	AYV52072.1	ATP-binding cassette (ABC) antibiotic efflux pump	efflux pump	lincosamide antibiotic
ARO:3002883	AFO53532.1	rifampin glycosyltransferase	product inactivation	rifamycin antibiotic
ARO:3002884	AAB41059.1	rifampin monooxygenase	product inactivation	rifamycin antibiotic
ARO:3002891	CAA37477.1	tetracycline-resistant ribosomal protection protein	target protection	tetracycline antibiotic
ARO:3002892	AAD04032.1	major facilitator superfamily (MFS) antibiotic efflux pump	efflux pump	tetracycline antibiotic
ARO:3002893	BAA07390.1	major facilitator superfamily (MFS) antibiotic efflux pump	efflux pump	tetracycline antibiotic
ARO:3002894	AAR96051.1	ATP-binding cassette (ABC) antibiotic efflux pump	efflux pump	tetracycline antibiotic
ARO:3002895	BAD95494.1	streptothricin acetyltransferase (SAT)	product inactivation	nucleoside antibiotic
ARO:3002897	AAB53445.1	streptothricin acetyltransferase (SAT)	product inactivation	nucleoside antibiotic
ARO:3002898	CAA88265.1	streptothricin acetyltransferase (SAT)	product inactivation	nucleoside antibiotic
ARO:3002907	AAL27442.1	glycopeptide resistance gene cluster;van ligase	target alteration	glycopeptide antibiotic
ARO:3002908	AAF36803.1	glycopeptide resistance gene cluster;van ligase	target alteration	glycopeptide antibiotic
ARO:3002909	ABA71731.1	glycopeptide resistance gene cluster;van ligase	target alteration	glycopeptide antibiotic
ARO:3002910	ABX54687.1	glycopeptide resistance gene cluster;van ligase	target alteration	glycopeptide antibiotic
ARO:3002911	ACL82961.1	glycopeptide resistance gene cluster;van ligase	target alteration	glycopeptide antibiotic
ARO:3002912	AEP40500.1	glycopeptide resistance gene cluster;van ligase	target alteration	glycopeptide antibiotic
ARO:3002913	AHA41500.1	glycopeptide resistance gene cluster;van ligase	target alteration	glycopeptide antibiotic
ARO:3002914	CAB45459.1	vanJ membrane protein	target alteration	glycopeptide antibiotic
ARO:3002919	AAA65953.1	glycopeptide resistance gene cluster;vanR	target alteration	glycopeptide antibiotic
ARO:3002921	AAB05622.1	glycopeptide resistance gene cluster;vanR	target alteration	glycopeptide antibiotic
ARO:3002922	AAF86641.1	glycopeptide resistance gene cluster;vanR	target alteration	glycopeptide antibiotic
ARO:3002923	AAM09851.1	glycopeptide resistance gene cluster;vanR	target alteration	glycopeptide antibiotic
ARO:3002924	AAL27445.1	glycopeptide resistance gene cluster;vanR	target alteration	glycopeptide antibiotic
ARO:3002925	AAR84672.1	glycopeptide resistance gene cluster;vanR	target alteration	glycopeptide antibiotic
ARO:3002926	ABA71727.1	glycopeptide resistance gene cluster;vanR	target alteration	glycopeptide antibiotic
ARO:3002927	ABX54691.1	glycopeptide resistance gene cluster;vanR	target alteration	glycopeptide antibiotic
ARO:3002928	ACL82957.1	glycopeptide resistance gene cluster;vanR	target alteration	glycopeptide antibiotic
ARO:3002929	AEP40503.1	glycopeptide resistance gene cluster;vanR	target alteration	glycopeptide antibiotic
ARO:3002930	AHA41505.1	glycopeptide resistance gene cluster;vanR	target alteration	glycopeptide antibiotic
ARO:3002931	AAA65954.1	glycopeptide resistance gene cluster;vanS	target alteration	glycopeptide antibiotic
ARO:3002932	AAB05623.1	glycopeptide resistance gene cluster;vanS	target alteration	glycopeptide antibiotic
ARO:3002933	AAF86642.1	glycopeptide resistance gene cluster;vanS	target alteration	glycopeptide antibiotic
ARO:3002934	ACM47284	glycopeptide resistance gene cluster;vanS	target alteration	glycopeptide antibiotic
ARO:3002935	AAL27446.1	glycopeptide resistance gene cluster;vanS	target alteration	glycopeptide antibiotic
ARO:3002936	AAR84673.1	glycopeptide resistance gene cluster;vanS	target alteration	glycopeptide antibiotic
ARO:3002937	ABA71728.1	glycopeptide resistance gene cluster;vanS	target alteration	glycopeptide antibiotic
ARO:3002938	ABX54692.1	glycopeptide resistance gene cluster;vanS	target alteration	glycopeptide antibiotic
ARO:3002939	ACL82958.1	glycopeptide resistance gene cluster;vanS	target alteration	glycopeptide antibiotic
ARO:3002940	AEP40504.1	glycopeptide resistance gene cluster;vanS	target alteration	glycopeptide antibiotic
ARO:3002941	AHA41504.1	glycopeptide resistance gene cluster;vanS	target alteration	glycopeptide antibiotic
ARO:3002942	AAA65955.1	glycopeptide resistance gene cluster;vanH	target alteration	glycopeptide antibiotic
ARO:3002943	AAB05626.1	glycopeptide resistance gene cluster;vanH	target alteration	glycopeptide antibiotic
ARO:3002944	AAM09850.1	glycopeptide resistance gene cluster;vanH	target alteration	glycopeptide antibiotic
ARO:3002945	AAF36802.1	glycopeptide resistance gene cluster;vanH	target alteration	glycopeptide antibiotic
ARO:3002947	ACL82960.1	glycopeptide resistance gene cluster;vanH	target alteration	glycopeptide antibiotic
ARO:3002948	AHA41499.1	glycopeptide resistance gene cluster;vanH	target alteration	glycopeptide antibiotic
ARO:3002949	AAA65957.1	glycopeptide resistance gene cluster;vanX	target alteration	glycopeptide antibiotic
ARO:3002950	AAB05628.1	glycopeptide resistance gene cluster;vanX	target alteration	glycopeptide antibiotic
ARO:3002952	AAF36804.1	glycopeptide resistance gene cluster;vanX	target alteration	glycopeptide antibiotic
ARO:3002953	ACL82962.1	glycopeptide resistance gene cluster;vanX	target alteration	glycopeptide antibiotic
ARO:3002954	AHA41501.1	glycopeptide resistance gene cluster;vanX	target alteration	glycopeptide antibiotic
ARO:3002955	AAA65958.1	glycopeptide resistance gene cluster;vanY	target alteration	glycopeptide antibiotic
ARO:3002956	AAB05624.1	glycopeptide resistance gene cluster;vanY	target alteration	glycopeptide antibiotic
ARO:3002957	AAM09853.1	glycopeptide resistance gene cluster;vanY	target alteration	glycopeptide antibiotic
ARO:3002958	AAF36805.1	glycopeptide resistance gene cluster;vanY	target alteration	glycopeptide antibiotic
ARO:3002959	ABA71729.1	glycopeptide resistance gene cluster;vanY	target alteration	glycopeptide antibiotic
ARO:3002961	ACL82959.1	glycopeptide resistance gene cluster;vanY	target alteration	glycopeptide antibiotic
ARO:3002962	AAA65959.1	glycopeptide resistance gene cluster;vanZ	target alteration	glycopeptide antibiotic
ARO:3002963	AAF36806.1	glycopeptide resistance gene cluster;vanZ	target alteration	glycopeptide antibiotic
ARO:3002964	AAB05625.1	glycopeptide resistance gene cluster;vanW	target alteration	glycopeptide antibiotic
ARO:3002965	ABA71730.1	glycopeptide resistance gene cluster;vanW	target alteration	glycopeptide antibiotic
ARO:3002966	AAF61331.1	glycopeptide resistance gene cluster;vanXY	target alteration	glycopeptide antibiotic
ARO:3002967	AAL27443.1	glycopeptide resistance gene cluster;vanXY	target alteration	glycopeptide antibiotic
ARO:3002968	ABX54688.1	glycopeptide resistance gene cluster;vanXY	target alteration	glycopeptide antibiotic
ARO:3002969	AEP40501.1	glycopeptide resistance gene cluster;vanXY	target alteration	glycopeptide antibiotic
ARO:3002970	AAD22403.1	glycopeptide resistance gene cluster;vanT	target alteration	glycopeptide antibiotic
ARO:3002971	AAL27444.1	glycopeptide resistance gene cluster;vanT	target alteration	glycopeptide antibiotic
ARO:3002972	ABA71733.1	glycopeptide resistance gene cluster;vanT	target alteration	glycopeptide antibiotic
ARO:3002973	ABX54689.1	glycopeptide resistance gene cluster;vanT	target alteration	glycopeptide antibiotic
ARO:3002974	ABX54690.1	glycopeptide resistance gene cluster;vanT	target alteration	glycopeptide antibiotic
ARO:3002975	AEP40502.2	glycopeptide resistance gene cluster;vanT	target alteration	glycopeptide antibiotic
ARO:3002982	CAH35803.1	resistance-nodulation-cell division (RND) antibiotic efflux pump	efflux pump	aminoglycoside antibiotic
ARO:3002983	CAH35802.1	resistance-nodulation-cell division (RND) antibiotic efflux pump	efflux pump	aminoglycoside antibiotic
ARO:3002985	AAG06942.1	pmr phosphoethanolamine transferase	target alteration	peptide antibiotic
ARO:3002986	AAC76093.1	undecaprenyl pyrophosphate related proteins	target alteration	peptide antibiotic
ARO:3002987	AAA99504.1	ATP-binding cassette (ABC) antibiotic efflux pump	efflux pump	peptide antibiotic
ARO:3002988	AAA99505.1	ATP-binding cassette (ABC) antibiotic efflux pump	efflux pump	peptide antibiotic
ARO:3002993	BAM76830.1	AQU beta-lactamase	product inactivation	cephalosporin
ARO:3002995	CAA37052.1	ROB beta-lactamase	product inactivation	cephalosporin;penam
[truncated: 2,573 more rows]

## Sheet: ncbiamr_index
Supplementary Table S1. Resistance Gene Index of NCBIAMR
HMM Name (629)	Description	Resistance Mechanism
154989_fosA-NCBIFAM	FosA/FosA2 family fosfomycin resistance glutathione transferase	product inactivation
156720500_bleO-NCBIFAM	bleomycin binding protein	product inactivation
1567214_ble-NCBIFAM	BLMA family bleomycin binding protein	product inactivation
16S_A1408_NpmB-NCBIFAM	16S rRNA (adenine(1408)-N(1))-methyltransferase NpmB	target alteration
16S_rRNA_NpmA-NCBIFAM	16S rRNA (adenine(1408)-N(1))-methyltransferase NpmA	target alteration
16S_rRNA_Rmt_B-NCBIFAM	RmtB family 16S rRNA (guanine(1405)-N(7))-methyltransferase	target alteration
16S_rRNA_Rmt_C-NCBIFAM	RmtC family 16S rRNA (guanine(1405)-N(7))-methyltransferase	target alteration
16S_rRNA_Rmt_D-NCBIFAM	RmtD family 16S rRNA (guanine(1405)-N(7))-methyltransferase	target alteration
16S_rRNA_Rmt_E-NCBIFAM	RmtE family 16S rRNA (guanine(1405)-N(7))-methyltransferase	target alteration
16S_rRNA_Rmt_F-NCBIFAM	RmtF family 16S rRNA (guanine(1405)-N(7))-methyltransferase	target alteration
16S_rRNA_Rmt_G-NCBIFAM	RmtG family 16S rRNA (guanine(1405)-N(7))-methyltransferase	target alteration
16S_rRNA_Rmt_gen-NCBIFAM	Rmt family 16S rRNA (guanine(1405)-N(7))-methyltransferase	target alteration
16S_rRNA_Rmt_H-NCBIFAM	RmtH family 16S rRNA (guanine(1405)-N(7))-methyltransferase	target alteration
299782349_fosC-NCBIFAM	FosC2 family fosfomycin resistance glutathione transferase	product inactivation
299782351_fosA-NCBIFAM	FosA3/FosA4 family fosfomycin resistance glutathione transferase	product inactivation
354827590_fosA-NCBIFAM	FosA family fosfomycin resistance glutathione transferase	product inactivation
47473_otr-NCBIFAM	tetracycline resistance ribosomal protection protein Otr(A)	target protection
485965_fosC-NCBIFAM	fosfomycin resistance kinase FosC	product inactivation
498180014_fosA-NCBIFAM	Fos family putative thiol transferase	product inactivation
AAC_2p_Ia-NCBIFAM	aminoglycoside N-acetyltransferase AAC(2')-Ia	product inactivation
AAC_2p_Ib-NCBIFAM	aminoglycoside N-acetyltransferase AAC(2')-Ib	product inactivation
AAC_2p_Ic-NCBIFAM	aminoglycoside N-acetyltransferase AAC(2')-Ic	product inactivation
AAC_2p_Id-NCBIFAM	aminoglycoside N-acetyltransferase AAC(2')-Id	product inactivation
AAC_2p_Ie-NCBIFAM	aminoglycoside N-acetyltransferase AAC(2')-Ie	product inactivation
AAC_2p_IIa-NCBIFAM	kasugamycin N-acetyltransferase AAC(2')-IIa	product inactivation
AAC_2p_IIb-NCBIFAM	kasugamycin N-acetyltransferase AAC(2')-IIb	product inactivation
AAC_3_I-NCBIFAM	AAC(3)-I family aminoglycoside 3-N-acetyltransferase	product inactivation
AAC_3_II-NCBIFAM	AAC(3)-II family aminoglycoside N-acetyltransferase	product inactivation
AAC_3_IV-NCBIFAM	AAC(3)-IV family aminoglycoside N-acetyltransferase	product inactivation
AAC_3_VIa-NCBIFAM	aminoglycoside N-acetyltransferase AAC(3)-VIa	product inactivation
AAC_3_VIII-NCBIFAM	aminoglycoside N-acetyltransferase AAC(3)-VIII	product inactivation
AAC_3_XI-NCBIFAM	aminoglycoside N-acetyltransferase AAC(3)-XI	product inactivation
AAC_3-NCBIFAM	aminoglycoside 3-N-acetyltransferase	product inactivation
AAC_6p_A10-NCBIFAM	AAC(6')-I family aminoglycoside 6'-N-acetyltransferase	product inactivation
AAC_6p_A29-NCBIFAM	aminoglycoside 6'-N-acetyltransferase AAC(6')-29	product inactivation
AAC_6p_A30-NCBIFAM	aminoglycoside 6'-N-acetyltransferase AAC(6')-30	product inactivation
AAC_6p_A31-NCBIFAM	aminoglycoside N-acetyltransferase AAC(6')-31	product inactivation
AAC_6p_A34-NCBIFAM	aminoglycoside 6'-N-acetyltransferase AacA34	product inactivation
AAC_6p_A37-NCBIFAM	aminoglycoside 6'-N-acetyltransferase AacA37	product inactivation
AAC_6p_A40-NCBIFAM	aminoglycoside 6'-N-acetyltransferase AacA40	product inactivation
AAC_6p_A48-NCBIFAM	aminoglycoside 6'-N-acetyltransferase AAC(6')-Iag	product inactivation
AAC_6p_A49-NCBIFAM	AAC(6')-Ia family aminoglycoside 6'-N-acetyltransferase AacA49	product inactivation
AAC_6p_Acine-NCBIFAM	AAC(6')-Ighjkrstuvwx family aminoglycoside N-acetyltransferase	product inactivation
AAC_6p_Entco-NCBIFAM	aminoglycoside 6'-N-acetyltransferase	product inactivation
AAC_6p_Ia_fam-NCBIFAM	AAC(6')-Ia family aminoglycoside 6'-N-acetyltransferase	product inactivation
AAC_6p_Iad-NCBIFAM	aminoglycoside N-acetyltransferase AAC(6')-Iad	product inactivation
AAC_6p_Iak-NCBIFAM	aminoglycoside N-acetyltransferase AAC(6')-Iak	product inactivation
AAC_6p_Ian-NCBIFAM	aminoglycoside N-acetyltransferase AAC(6')-Ian	product inactivation
AAC_6p_Ib-NCBIFAM	AAC(6')-Ib family aminoglycoside 6'-N-acetyltransferase	product inactivation
AAC_6p_Id-NCBIFAM	aminoglycoside N-acetyltransferase AAC(6')-Id	product inactivation
AAC_6p_Ie_fam-NCBIFAM	AAC(6')-Ie family aminoglycoside N-acetyltransferase	product inactivation
AAC_6p_Ie-NCBIFAM	aminoglycoside N-acetyltransferase AAC(6')-Ie	product inactivation
AAC_6p_If-NCBIFAM	aminoglycoside N-acetyltransferase AAC(6')-If	product inactivation
AAC_6p_IIc-NCBIFAM	aminoglycoside N-acetyltransferase AAC(6')-IIc	product inactivation
AAC_6p_III-NCBIFAM	tobramycin N-acetyltransferase AAC(6')-III	product inactivation
AAC_6p_Il-NCBIFAM	aminoglycoside N-acetyltransferase AAC(6')-Il	product inactivation
AAC_6p_Im-NCBIFAM	aminoglycoside N-acetyltransferase AAC(6')-Im	product inactivation
AAC_6p_Ip-NCBIFAM	aminoglycoside 6'-N-acetyltransferase AAC(6')-Ip	product inactivation
AAC_6p_Iz-NCBIFAM	aminoglycoside N-acetyltransferase AAC(6')-Iz	product inactivation
AAC_6p_Serra-NCBIFAM	aminoglycoside 6'-N-acetyltransferase	product inactivation
AAC_6p_set_A-NCBIFAM	aminoglycoside 6'-N-acetyltransferase	product inactivation
AAC_6p_Steno-NCBIFAM	aminoglycoside 6'-N-acetyltransferase	product inactivation
AAC_6p_Strep-NCBIFAM	aminoglycoside 6'-N-acetyltransferase	product inactivation
AAC_6p_Yersi-NCBIFAM	aminoglycoside 6'-N-acetyltransferase	product inactivation
aadE-Cc-NCBIFAM	aminoglycoside 6-adenylyltransferase AadE-Cc	product inactivation
ABCF_CarA-NCBIFAM	ABC-F type ribosomal protection protein Car(A)	target protection
ABCF_Lsa_all-NCBIFAM	Lsa family ABC-F type ribosomal protection protein	target protection
ABCF_Msr_all-NCBIFAM	Msr family ABC-F type ribosomal protection protein	target protection
ABCF_OptrA-NCBIFAM	ABC-F type ribosomal protection protein OptrA	target protection
ABCF_producer-NCBIFAM	TlrC/CarA/OleB/SrmB family ABC-F type ribosomal protection protein	target protection
ABCF_Sal-NCBIFAM	Sal family ABC-F type ribosomal protection protein	target protection
ABCF_Vga_all-NCBIFAM	Vga family ABC-F type ribosomal protection protein	target protection
amicyc_ac_ApmA-NCBIFAM	aminocyclitol acetyltransferase ApmA	product inactivation
ANT_2pp_Ia-NCBIFAM	aminoglycoside nucleotidyltransferase ANT(2'')-Ia	product inactivation
ANT_3pp_AadA1-NCBIFAM	ANT(3'')-Ia family aminoglycoside nucleotidyltransferase AadA1	product inactivation
ANT_3pp_AadA3-NCBIFAM	ANT(3'')-Ia family aminoglycoside nucleotidyltransferase AadA3	product inactivation
ANT_3pp_I-NCBIFAM	ANT(3'')-I family aminoglycoside nucleotidyltransferase	product inactivation
ANT_3pp_II-NCBIFAM	ANT(3'')-II family aminoglycoside nucleotidyltransferase	product inactivation
ANT_4p_I-NCBIFAM	ANT(4')-I family aminoglycoside nucleotidyltransferase	product inactivation
ANT_4p_Ia-NCBIFAM	aminoglycoside O-nucleotidyltransferase ANT(4')-Ia	product inactivation
ANT_4p_Ib-NCBIFAM	aminoglycoside O-nucleotidyltransferase ANT(4')-Ib	product inactivation
ANT_4p_II-NCBIFAM	ANT(4')-II family aminoglycoside nucleotidyltransferase	product inactivation
ANT_6_aadK-NCBIFAM	aminoglycoside 6-adenylyltransferase AadK	product inactivation
ANT_6_aadS-NCBIFAM	AadS family aminoglycoside 6-adenylyltransferase	product inactivation
ANT_6_str-NCBIFAM	streptomycin adenylyltransferase Str	product inactivation
ANT_6-NCBIFAM	aminoglycoside 6-nucleotidyltransferase	product inactivation
ANT_9-NCBIFAM	ANT(9) family aminoglycoside nucleotidyltransferase	product inactivation
APH_2pp_I_a_f_h-NCBIFAM	APH(2'')-Ia/If/Ih family aminoglycoside O-phosphotransferase	product inactivation
APH_2pp_Ia-NCBIFAM	aminoglycoside O-phosphotransferase APH(2'')-Ia	product inactivation
APH_2pp_Ie_IVa-NCBIFAM	APH(2'')-Ie/IVa family aminoglycoside O-phosphotransferase	product inactivation
APH_2pp_If_Ih-NCBIFAM	APH(2'')-If/Ih family aminoglycoside O-phosphotransferase	product inactivation
APH_2pp_Ig-NCBIFAM	aminoglycoside O-phosphotransferase APH(2'')-Ig	product inactivation
APH_2pp_IIa-NCBIFAM	aminoglycoside O-phosphotransferase APH(2'')-IIa	product inactivation
APH_2pp_IIIa-NCBIFAM	aminoglycoside O-phosphotransferase APH(2'')-IIIa	product inactivation
APH_3p_A16-NCBIFAM	APH(3') family aminoglycoside O-phosphotransferase AphA16	product inactivation
APH_3p_I-NCBIFAM	APH(3')-I family aminoglycoside O-phosphotransferase	product inactivation
APH_3p_II-NCBIFAM	APH(3')-II family aminoglycoside O-phosphotransferase	product inactivation
APH_3p_IIIa-NCBIFAM	aminoglycoside O-phosphotransferase APH(3')-IIIa	product inactivation
APH_3p_IVa-NCBIFAM	aminoglycoside O-phosphotransferase APH(3')-IVa	product inactivation
APH_3p_V-NCBIFAM	APH(3')-V family aminoglycoside O-phosphotransferase	product inactivation
APH_3p_VI-NCBIFAM	APH(3')-VI family aminoglycoside O-phosphotransferase	product inactivation
APH_3p_VIIa-NCBIFAM	aminoglycoside O-phosphotransferase APH(3')-VIIa	product inactivation
APH_3p_VIII-NCBIFAM	aminoglycoside O-phosphotransferase APH(3')-VIII	product inactivation
APH_3p_XV-NCBIFAM	aminoglycoside O-phosphotransferase APH(3')-XV	product inactivation
APH_3p-NCBIFAM	APH(3') family aminoglycoside O-phosphotransferase	product inactivation
APH_3pp_Ia-NCBIFAM	aminoglycoside O-phosphotransferase APH(3'')-Ia	product inactivation
APH_3pp_Ib-NCBIFAM	aminoglycoside O-phosphotransferase APH(3'')-Ib	product inactivation
APH_3pp-NCBIFAM	APH(3'') family aminoglycoside O-phosphotransferase	product inactivation
APH_4_Ia-NCBIFAM	aminoglycoside O-phosphotransferase APH(4)-Ia	product inactivation
APH_6_Ic_gen-NCBIFAM	APH(6)-I family aminoglycoside O-phosphotransferase	product inactivation
APH_6_Ic-NCBIFAM	aminoglycoside O-phosphotransferase APH(6)-Ic	product inactivation
APH_6_Steno-NCBIFAM	APH(6) family putative aminoglycoside O-phosphotransferase	product inactivation
APH_6-NCBIFAM	APH(6)-I family aminoglycoside O-phosphotransferase	product inactivation
APH_7pp_Ia-NCBIFAM	aminoglycoside O-phosphotransferase APH(7'')-Ia	product inactivation
APH_9_Ia-NCBIFAM	aminoglycoside O-phosphotransferase APH(9)-Ia	product inactivation
APH_9_Ib-NCBIFAM	aminoglycoside O-phosphotransferase APH(9)-Ib	product inactivation
arsB_Sta_pI258-NCBIFAM	arsenite efflux transporter membrane subunit ArsB	efflux pump
betalact_A_Burk_PenA-NCBIFAM	PenA family class A beta-lactamase	product inactivation
betalact_A_Burk_PenI-NCBIFAM	PenI family class A extended-spectrum beta-lactamase	product inactivation
bla_B2_CphA-NCBIFAM	ChpA family subclass B2 metallo-beta-lactamase	product inactivation
bla_Bc_2-NCBIFAM	BcII family subclass B1 metallo-beta-lactamase	product inactivation
bla_CblA-NCBIFAM	CblA family class A beta-lactamase	product inactivation
bla_CepA-NCBIFAM	CepA family class A extended-spectrum beta-lactamase	product inactivation
bla_CfxA-NCBIFAM	CfxA family class A broad-spectrum beta-lactamase	product inactivation
bla_class_A-NCBIFAM	class A beta-lactamase	product inactivation
bla_class_B_core-NCBIFAM	metallo-beta-lactamase core region	product inactivation
bla_class_C-NCBIFAM	class C beta-lactamase	product inactivation
bla_class_D_alt-NCBIFAM	class D beta-lactamase	product inactivation
bla_class_D_main-NCBIFAM	class D beta-lactamase	product inactivation
bla_Exo-NCBIFAM	Exo family class A beta-lactamase	product inactivation
bla_subclass_B1-NCBIFAM	subclass B1 metallo-beta-lactamase	product inactivation
bla_subclass_B2-NCBIFAM	subclass B2 metallo-beta-lactamase	product inactivation
bla_subclass_B3-NCBIFAM	subclass B3 metallo-beta-lactamase	product inactivation
bla_xUS-NCBIFAM	MUS/TUS/MOC family subclass B1 metallo-beta-lactamase	product inactivation
bla-A_Chryseo-NCBIFAM	CGA/CIA family class A beta-lactamase	product inactivation
bla-B1-FLAV-NCBIFAM	subclass B1 metallo-beta-lactamase	product inactivation
bla1-NCBIFAM	class A beta-lactamase Bla1	product inactivation
BlaA_Yent-NCBIFAM	class A beta-lactamase BlaA	product inactivation
blaAAK-NCBIFAM	AAK family class A beta-lactamase	product inactivation
blaACC-NCBIFAM	ACC family cephalosporin-hydrolyzing class C beta-lactamase	product inactivation
blaACI-NCBIFAM	ACI family class A beta-lactamase	product inactivation
blaACT-NCBIFAM	ACT family cephalosporin-hydrolyzing class C beta-lactamase	product inactivation
blaADC-NCBIFAM	ADC family extended-spectrum class C beta-lactamase	product inactivation
blaAFM-NCBIFAM	AFM family subclass B1 metallo-beta-lactamase	product inactivation
blaAIM-NCBIFAM	AIM family subclass B3 metallo-beta-lactamase	product inactivation
blaALI-NCBIFAM	ALI family subclass B1 metallo-beta-lactamase	product inactivation
blaAQU-NCBIFAM	AQU family class C beta-lactamase	product inactivation
blaARL-NCBIFAM	ARL family class A beta-lactamase	product inactivation
blaAXC-NCBIFAM	AXC family carbapenem-hydrolyzing class A beta-lactamase	product inactivation
blaB-IND-MUS-NCBIFAM	BlaB/IND/MUS family subclass B1 metallo-beta-lactamase	product inactivation
blaB-NCBIFAM	BlaB family subclass B1 metallo-beta-lactamase	product inactivation
blaBBI-NCBIFAM	BBI family class A beta-lactamase	product inactivation
blaBCL-NCBIFAM	BCL family class A beta-lactamase	product inactivation
blaBEL-NCBIFAM	BEL family class A extended-spectrum beta-lactamase	product inactivation
blaBES-NCBIFAM	BES family class A beta-lactamase	product inactivation
blaBIC-NCBIFAM	BIC family carbapenem-hydrolyzing class A beta-lactamase	product inactivation
blaBJP-NCBIFAM	BJP family subclass B3 metallo-beta-lactamase	product inactivation
blaBKC_GPC-NCBIFAM	BKC/GPC family carbapenem-hydrolyzing class A beta-lactamase	product inactivation
blaBKC-NCBIFAM	BKC family carbapenem-hydrolyzing class A beta-lactamase	product inactivation
blaBPU-NCBIFAM	BPU family class D beta-lactamase	product inactivation
blaBUT-NCBIFAM	BUT family class C beta-lactamase	product inactivation
blaCAM-NCBIFAM	CAM family subclass B1 metallo-beta-lactamase	product inactivation
blaCAU-NCBIFAM	CAU/MBL1b family subclass B3 metallo-beta-lactamase	product inactivation
blaCBP-NCBIFAM	CBP family penicillin-hydrolyzing class A beta-lactamase	product inactivation
blaCcrA-NCBIFAM	CfiA family subclass B1 metallo-beta-lactamase	product inactivation
blaCDD-NCBIFAM	CDD family class D beta-lactamase	product inactivation
blaCIA-NCBIFAM	CIA family class A extended-spectrum beta-lactamase	product inactivation
blaCMA-NCBIFAM	CMA family class C beta-lactamase	product inactivation
blaCME-NCBIFAM	CME family class A extended-spectrum beta-lactamase	product inactivation
blaCMH-NCBIFAM	CMH family class C beta-lactamase	product inactivation
blaCPS-NCBIFAM	CPS family subclass B3 metallo-beta-lactamase	product inactivation
blaCRH-NCBIFAM	CRH family carbapenem-hydrolyzing class A beta-lactamase	product inactivation
blaCRP-NCBIFAM	CRP family carbapenem-hydrolyzing class A beta-lactamase	product inactivation
blaCSA-NCBIFAM	CSA family class C beta-lactamase	product inactivation
blaCTX-M-NCBIFAM	CTX-M family class A extended-spectrum beta-lactamase	product inactivation
blaCVI-NCBIFAM	CVI family subclass B2 metallo-beta-lactamase	product inactivation
blaDHA-NCBIFAM	DHA family class C beta-lactamase	product inactivation
blaDIM_SIM_IMP-NCBIFAM	DIM/SIM/IMP family subclass B1 metallo-beta-lactamase	product inactivation
blaDIM-NCBIFAM	DIM family subclass B1 metallo-beta-lactamase	product inactivation
blaEAM-NCBIFAM	EAM family subclass B3 metallo-beta-lactamase	product inactivation
blaEBR-NCBIFAM	EBR family subclass B1 metallo-beta-lactamase	product inactivation
BlaEC-NCBIFAM	BlaEC family class C beta-lactamase	product inactivation
blaECM-NCBIFAM	ECM family subclass B3 metallo-beta-lactamase	product inactivation
blaEFM-NCBIFAM	EFM family subclass B3 metallo-beta-lactamase	product inactivation
blaESP-1_fam-NCBIFAM	ESP-1 family subclass B3 metallo-beta-lactamase	product inactivation
blaFEZ-NCBIFAM	FEZ family subclass B3 metallo-beta-lactamase	product inactivation
blaFIM-NCBIFAM	FIM family subclass B1 metallo-beta-lactamase	product inactivation
blaFONA-NCBIFAM	FONA family class A beta-lactamase	product inactivation
blaFOX-NCBIFAM	FOX family cephalosporin-hydrolyzing class C beta-lactamase	product inactivation
blaFRI-NCBIFAM	FRI family carbapenem-hydrolyzing class A beta-lactamase	product inactivation
blaFTU-NCBIFAM	FTU family class A beta-lactamase	product inactivation
blaGES-NCBIFAM	GES family class A beta-lactamase	product inactivation
blaGIL-NCBIFAM	GIL family class A beta-lactamase	product inactivation
blaGIM-NCBIFAM	GIM family subclass B1 metallo-beta-lactamase	product inactivation
blaGMB-NCBIFAM	GMB family subclass B1 metallo-beta-lactamase	product inactivation
blaGOB-NCBIFAM	GOB family subclass B3 metallo-beta-lactamase	product inactivation
BlaI_of_MRSA-NCBIFAM	penicillinase repressor BlaI	product inactivation
blaIDC-NCBIFAM	IDC family class C beta-lactamase	product inactivation
blaIMI-NCBIFAM	IMI family carbapenem-hydrolyzing class A beta-lactamase	product inactivation
blaIMP-NCBIFAM	IMP family subclass B1 metallo-beta-lactamase	product inactivation
blaIND-NCBIFAM	IND family subclass B1 metallo-beta-lactamase	product inactivation
blaKHM-HMB-NCBIFAM	KHM/HMB family subclass B1 metallo-beta-lactamase	product inactivation
blaKLUC-NCBIFAM	KLUC family class A extended-spectrum beta-lactamase	product inactivation
blaKPC-NCBIFAM	KPC family carbapenem-hydrolyzing class A beta-lactamase	product inactivation
blaL-NCBIFAM	BlaL family class A beta-lactamase	product inactivation
blaL1-NCBIFAM	L1 family subclass B3 metallo-beta-lactamase	product inactivation
blaLAP-NCBIFAM	LAP family class A beta-lactamase	product inactivation
blaLAQ-NCBIFAM	LAQ family class C beta-lactamase	product inactivation
blaLHK-NCBIFAM	LHK family class C beta-lactamase	product inactivation
blaLUT-NCBIFAM	LUT family class A beta-lactamase	product inactivation
blaMCA-NCBIFAM	MCA family class C beta-lactamase	product inactivation
BlaMIR-NCBIFAM	MIR family cephalosporin-hydrolyzing class C beta-lactamase	product inactivation
blaMSI-1_fam-NCBIFAM	MSI-1 family subclass B3 metallo-beta-lactamase	product inactivation
blaMUS-NCBIFAM	MUS family subclass B1 metallo-beta-lactamase	product inactivation
blaNDM-NCBIFAM	NDM family subclass B1 metallo-beta-lactamase	product inactivation
blaOCH-NCBIFAM	OCH family class C extended-spectrum beta-lactamase	product inactivation
blaORN-NCBIFAM	ORN family class A beta-lactamase	product inactivation
blaOXA_Campylobacter-NCBIFAM	class D beta-lactamase	product inactivation
blaOXA-1_like-NCBIFAM	OXA-1 family class D beta-lactamase	product inactivation
blaOXA-10_like-NCBIFAM	OXA-10 family class D beta-lactamase	product inactivation
blaOXA-1036_like-NCBIFAM	OXA-1036 family carbapenem-hydrolyzing class D beta-lactamase	product inactivation
blaOXA-1043_like-NCBIFAM	OXA-1043 family class D beta-lactamase	product inactivation
blaOXA-114_like-NCBIFAM	OXA-114 family class D beta-lactamase	product inactivation
blaOXA-12_like-NCBIFAM	OXA-12 family class D beta-lactamase	product inactivation
blaOXA-134_like-NCBIFAM	OXA-134 family carbapenem-hydrolyzing class D beta-lactamase	product inactivation
blaOXA-143_like-NCBIFAM	OXA-143 family carbapenem-hydrolyzing class D beta-lactamase	product inactivation
blaOXA-184_like-NCBIFAM	OXA-184 family class D beta-lactamase	product inactivation
blaOXA-2_like-NCBIFAM	OXA-2 family class D beta-lactamase	product inactivation
blaOXA-211_like-NCBIFAM	OXA-211 family carbapenem-hydrolyzing class D beta-lactamase	product inactivation
blaOXA-213_like-NCBIFAM	OXA-213 family carbapenem-hydrolyzing class D beta-lactamase	product inactivation
blaOXA-214_like-NCBIFAM	OXA-214 family carbapenem-hydrolyzing class D beta-lactamase	product inactivation
blaOXA-22_like-NCBIFAM	OXA-22 family class D beta-lactamase	product inactivation
blaOXA-229_like-NCBIFAM	OXA-229 family carbapenem-hydrolyzing class D beta-lactamase	product inactivation
blaOXA-23_like-NCBIFAM	OXA-23 family carbapenem-hydrolyzing class D beta-lactamase	product inactivation
blaOXA-24_like-NCBIFAM	OXA-24 family carbapenem-hydrolyzing class D beta-lactamase	product inactivation
blaOXA-266_like-NCBIFAM	OXA-266 family class D beta-lactamase	product inactivation
blaOXA-274_like-NCBIFAM	OXA-274 family class D beta-lactamase	product inactivation
blaOXA-286_like-NCBIFAM	OXA-286 family class D beta-lactamase	product inactivation
blaOXA-294_like-NCBIFAM	OXA-294 family class D beta-lactamase	product inactivation
blaOXA-364_like-NCBIFAM	OXA-364 family class D beta-lactamase	product inactivation
blaOXA-372_like-NCBIFAM	OXA-372 family carbapenem-hydrolyzing class D beta-lactamase	product inactivation
blaOXA-42_like-NCBIFAM	OXA-42 family class D beta-lactamase	product inactivation
blaOXA-427_like-NCBIFAM	OXA-427 family carbapenem-hydrolyzing class D beta-lactamase	product inactivation
blaOXA-46_like-NCBIFAM	OXA-46 family oxacillin-hydrolyzing class D beta-lactamase	product inactivation
blaOXA-48_like-NCBIFAM	OXA-48 family class D beta-lactamase	product inactivation
blaOXA-493_like-NCBIFAM	OXA-493 family class D beta-lactamase	product inactivation
blaOXA-5_like-NCBIFAM	OXA-5 family class D beta-lactamase	product inactivation
blaOXA-50_like-NCBIFAM	OXA-50 family oxacillin-hydrolyzing class D beta-lactamase	product inactivation
blaOXA-51_like-NCBIFAM	OXA-51 family carbapenem-hydrolyzing class D beta-lactamase	product inactivation
blaOXA-548_like-NCBIFAM	OXA-548 family class D beta-lactamase	product inactivation
blaOXA-55_like-NCBIFAM	OXA-55 family carbapenem-hydrolyzing class D beta-lactamase	product inactivation
blaOXA-576_like-NCBIFAM	OXA-576 family class D beta-lactamase	product inactivation
blaOXA-58_like-NCBIFAM	OXA-58 family carbapenem-hydrolyzing class D beta-lactamase	product inactivation
blaOXA-60_like-NCBIFAM	OXA-60 family carbapenem-hydrolyzing class D beta-lactamase	product inactivation
blaOXA-61_like-NCBIFAM	OXA-61 family class D beta-lactamase	product inactivation
blaOXA-62_like-NCBIFAM	OXA-62 family carbapenem-hydrolyzing class D beta-lactamase	product inactivation
blaOXA-63_like-NCBIFAM	OXA-63 family oxacillin-hydrolyzing class D beta-lactamase	product inactivation
blaOXA-679_like-NCBIFAM	OXA-679 family carbapenem-hydrolyzing class D beta-lactamase	product inactivation
blaOXA-727_like-NCBIFAM	OXA-727 family class D beta-lactamase	product inactivation
blaOXA-85_like-NCBIFAM	OXA-85 family oxacillin-hydrolyzing class D beta-lactamase	product inactivation
blaOXA-9_like-NCBIFAM	OXA-9 family oxacillin-hydrolyzing class D beta-lactamase	product inactivation
blaOXA-919_like-NCBIFAM	OXA-919 family class D beta-lactamase	product inactivation
blaOXY-NCBIFAM	OXY family class A extended-spectrum beta-lactamase	product inactivation
blaP-NCBIFAM	class A beta-lactamase BlaP	product inactivation
blaPAC-NCBIFAM	PAC family class C beta-lactamase	product inactivation
blaPAD-NCBIFAM	PAD family carbapenem-hydrolyzing class A beta-lactamase	product inactivation
blaPAU-NCBIFAM	PAU family class A beta-lactamase	product inactivation
blaPDC_var-NCBIFAM	PDC variant family class C beta-lactamase	product inactivation
blaPDC-NCBIFAM	PDC family class C beta-lactamase	product inactivation
blaPEDO-1_fam-NCBIFAM	PEDO-1 family subclass B3 metallo-beta-lactamase	product inactivation
blaPEDO-2_fam-NCBIFAM	PEDO-2 family subclass B3 metallo-beta-lactamase	product inactivation
blaPEDO-3_fam-NCBIFAM	PEDO-3 family subclass B1 metallo-beta-lactamase	product inactivation
blaPER-NCBIFAM	PER family class A extended-spectrum beta-lactamase	product inactivation
blaPFM-NCBIFAM	PFM family subclass B2 metallo-beta-lactamase	product inactivation
blaPLA_ORN_TER-NCBIFAM	PLA/ORN/TER family class A beta-lactamase	product inactivation
blaPLA-NCBIFAM	PLA family class A beta-lactamase	product inactivation
blaPME-NCBIFAM	PME family class A beta-lactamase	product inactivation
blaPOM-NCBIFAM	POM family subclass B3 metallo-beta-lactamase	product inactivation
blaPST-NCBIFAM	PST family subclass B1 metallo-beta-lactamase	product inactivation
blaPSV-NCBIFAM	PSV family class A beta-lactamase	product inactivation
blaR1_generic-NCBIFAM	BlaR1 family beta-lactam sensor/signal transducer	product inactivation
blaRAA-NCBIFAM	RAA family class A beta-lactamase	product inactivation
blaRASA-NCBIFAM	RASA family class A extended-spectrum beta-lactamase	product inactivation
blaRCP-NCBIFAM	RCP family class A beta-lactamase	product inactivation
blaRHO-NCBIFAM	RHO family class C beta-lactamase	product inactivation
blaROB-NCBIFAM	ROB family class A beta-lactamase	product inactivation
blaRUB-NCBIFAM	RUB family class A broad-spectrum beta-lactamase	product inactivation
blaSCO-NCBIFAM	SCO family class A beta-lactamase	product inactivation
blaSED-NCBIFAM	SED family class A beta-lactamase	product inactivation
blaSFC-NCBIFAM	SFC family carbapenem-hydrolyzing class A beta-lactamase	product inactivation
blaSFH_gen-NCBIFAM	SFH-related subclass B2 metallo-beta-lactamase	product inactivation
blaSFH-NCBIFAM	SFH family subclass B2 metallo-beta-lactamase	product inactivation
blaSGM-NCBIFAM	SGM family class A beta-lactamase	product inactivation
blaSIM-NCBIFAM	SIM family subclass B1 metallo-beta-lactamase	product inactivation
blaSME-NCBIFAM	SME family carbapenem-hydrolyzing class A beta-lactamase	product inactivation
blaSPG-1_fam-NCBIFAM	SPG-1 family subclass B3 metallo-beta-lactamase	product inactivation
blaSPM-NCBIFAM	SPM family subclass B1 metallo-beta-lactamase	product inactivation
blaSRT-NCBIFAM	SRT/SST family class C beta-lactamase	product inactivation
blaTEM-NCBIFAM	TEM family class A beta-lactamase	product inactivation
blaTER-NCBIFAM	TER family class A beta-lactamase	product inactivation
blaTHIN-NCBIFAM	THIN family subclass B3 metallo-beta-lactamase	product inactivation
blaTLA-NCBIFAM	TLA family class A extended-spectrum beta-lactamase	product inactivation
blaTMB-NCBIFAM	TMB family subclass B1 metallo-beta-lactamase	product inactivation
blaTTU-NCBIFAM	TTU family subclass B1 metallo-beta-lactamase	product inactivation
blaTUS-NCBIFAM	TUS family subclass B1 metallo-beta-lactamase	product inactivation
blaVCC-NCBIFAM	VCC family carbapenem-hydrolyzing class A beta-lactamase	product inactivation
blaVEB-NCBIFAM	VEB family class A extended-spectrum beta-lactamase	product inactivation
blaVIM-NCBIFAM	VIM family subclass B1 metallo-beta-lactamase	product inactivation
blaVMB-NCBIFAM	VMB family subclass B1 metallo-beta-lactamase	product inactivation
blaYEM-NCBIFAM	YEM family subclass B2 metallo-beta-lactamase	product inactivation
blaYRC-NCBIFAM	YRC family class C beta-lactamase	product inactivation
blaZ_gen-NCBIFAM	BlaZ-like penicillin-hydrolyzing class A beta-lactamase	product inactivation
blaZ_mecC_type-NCBIFAM	mecC-type penicillin-hydrolyzing class A beta-lactamase BlaZ	product inactivation
blaZ-NCBIFAM	penicillin-hydrolyzing class A beta-lactamase BlaZ	product inactivation
ble_BLMA_gen-NCBIFAM	BLMA family bleomycin binding protein	product inactivation
ble_BLMT-NCBIFAM	BLMT family bleomycin binding protein	product inactivation
ble_MBL-NCBIFAM	bleomycin binding protein Ble-MBL	product inactivation
ble_Sh-NCBIFAM	phleomycin/bleomycin binding protein Ble-Sh	product inactivation
BlmB-NCBIFAM	bleomycin family antibiotic N-acetyltransferase BlmB	product inactivation
CAR_gen_B3-NCBIFAM	CAR family subclass B3 metallo-beta-lactamase	product inactivation
CARB-NCBIFAM	CARB family carbenicillin-hydrolyzing class A beta-lactamase	product inactivation
carbeni_gen-NCBIFAM	CARB/PSE/RTG family carbenicillin-hydrolyzing class A beta-lactamase	product inactivation
CfrAB-NCBIFAM	Cfr family 23S rRNA (adenine(2503)-C(8))-methyltransferase	target alteration
chaperon_ArsD-NCBIFAM	arsenite efflux transporter metallochaperone ArsD	efflux pump
CHL_hydrolase-NCBIFAM	chloramphenicol hydrolase	product inactivation
chloram_CatA-NCBIFAM	type A chloramphenicol O-acetyltransferase	product inactivation
chloram_CatB-NCBIFAM	type B chloramphenicol O-acetyltransferase	product inactivation
chrB-NCBIFAM	23S rRNA (guanine(748)-N(1))-methyltransferase ChrB	target alteration
classA_carba-NCBIFAM	carbapenem-hydrolyzing class A beta-lactamase	product inactivation
classA_firm-NCBIFAM	class A beta-lactamase	product inactivation
cml_V_MFS-NCBIFAM	chloramphenicol efflux MFS transporter CmlV	efflux pump
cmlA_floR-NCBIFAM	CmlA/FloR family chloramphenicol efflux MFS transporter	efflux pump
cmlB1_MFS-NCBIFAM	chloramphenicol efflux MFS transporter CmlB1	efflux pump
cmx_cmrA-NCBIFAM	Cmx/CmrA family chloramphenicol efflux MFS transporter	efflux pump
CMY2-MIR-ACT-EC-NCBIFAM	CMY2/MIR/ACT/EC family class C beta-lactamase	product inactivation
CMY2-NCBIFAM	CMY-2 family class C beta-lactamase	product inactivation
D_ala_D_lac_Ao2-NCBIFAM	D-alanine--(R)-lactate ligase VanA-Ao2	target protection
D_ala_D_lac_Sc-NCBIFAM	D-alanine--(R)-lactate ligase VanA-Sc	target protection
D_ala_D_lac_VanA-NCBIFAM	D-alanine--(R)-lactate ligase VanA	target protection
D_ala_D_lac_VanB-NCBIFAM	D-alanine--(R)-lactate ligase VanB	target protection
D_ala_D_lac_VanD-NCBIFAM	D-alanine--(R)-lactate ligase VanD	target protection
D_ala_D_lac_VanF-NCBIFAM	D-alanine--(R)-lactate ligase VanF	target protection
D_ala_D_lac_VanI-NCBIFAM	D-alanine--(R)-lactate ligase VanI	target protection
D_ala_D_lac_VanM-NCBIFAM	D-alanine--(R)-lactate ligase VanM	target protection
D_ala_D_lac_VanO-NCBIFAM	D-alanine--(R)-lactate ligase VanO	target protection
D_ala_D_lac-NCBIFAM	D-alanine--(R)-lactate ligase	target alteration
D_ala_D_ser_VanC-NCBIFAM	D-alanine--D-serine ligase VanC	target protection
D_ala_D_ser_VanE-NCBIFAM	D-alanine--D-serine ligase VanE	target protection
D_ala_D_ser_VanG-NCBIFAM	D-alanine--D-serine ligase VanG	target protection
D_ala_D_ser_VanL-NCBIFAM	D-alanine--D-serine ligase VanL	target protection
D_ala_D_ser_VanN-NCBIFAM	D-alanine--D-serine ligase VanN	target protection
D_ala_D_ser-NCBIFAM	D-alanine--D-serine ligase	target alteration
dipept_VanX-NCBIFAM	D-Ala-D-Ala dipeptidase VanX	target protection
efflux_CmlA-NCBIFAM	CmlA family chloramphenicol efflux MFS transporter	efflux pump
efflux_Cmx-NCBIFAM	chloramphenicol efflux MFS transporter Cmx	efflux pump
efflux_OM_AdeC-NCBIFAM	multidrug efflux RND transporter AdeABC outer membrane channel subunit AdeC	efflux pump
emrE-Resfams	Resfams: SMR family small multidrug resistance efflux protein EmrE	efflux pump
EreA-NCBIFAM	EreA family erythromycin esterase	product inactivation
EreB-NCBIFAM	EreB family erythromycin esterase	product inactivation
EreD-NCBIFAM	EreD family erythromycin esterase	product inactivation
erm_38_23S_MT-NCBIFAM	23S rRNA (adenine(2058)-N(6))-methyltransferase Erm(38)	target alteration
erm_A_23S_MT-NCBIFAM	23S rRNA (adenine(2058)-N(6))-methyltransferase Erm(A)	target alteration
erm_B_23S_MT-NCBIFAM	23S rRNA (adenine(2058)-N(6))-methyltransferase Erm(B)	target alteration
erm_C_23S_MT-NCBIFAM	23S rRNA (adenine(2058)-N(6))-methyltransferase Erm(C)	target alteration
erm_F_23S_MT-NCBIFAM	23S rRNA (adenine(2058)-N(6))-methyltransferase Erm(F)	target alteration
erm_SHROVE-NCBIFAM	ErmE/ErmH/ErmO/ErmR family 23S rRNA (adenine(2058)-N(6))-methyltransferase	target alteration
Erm23S_rRNA_broad-NCBIFAM	23S ribosomal RNA methyltransferase Erm	target alteration
Erm32-NCBIFAM	23S rRNA (guanine(748)-N(1))-methyltransferase Erm(32)	target alteration
Erm37-NCBIFAM	23S rRNA (adenine(2058)-N(6))-methyltransferase Erm(37)	target alteration
Erm42-NCBIFAM	23S rRNA (adenine(2058)-N(6))-methyltransferase Erm(42)	target alteration
Erm43-NCBIFAM	23S rRNA (adenine(2058)-N(6))-methyltransferase Erm(43)	target alteration
Erm45-NCBIFAM	23S rRNA (adenine(2058)-N(6))-methyltransferase Erm(45)	target alteration
ErmO-NCBIFAM	23S rRNA (adenine(2058)-N(6))-methyltransferase Erm(O)	target alteration
ErmS-NCBIFAM	23S rRNA (adenine(2058)-N(6))-methyltransferase Erm(S)	target alteration
ErmV-NCBIFAM	23S rRNA (adenine(2058)-N(6))-methyltransferase Erm(V)	target alteration
FexA-NCBIFAM	chloramphenicol/florfenicol efflux MFS transporter FexA	efflux pump
FloR-NCBIFAM	chloramphenicol/florfenicol efflux MFS transporter FloR	efflux pump
fomA_AB016934.1.gene6-NCBIFAM	fosfomycin resistance kinase FomA	product inactivation
Fos_BSH_Bcer-NCBIFAM	FosB family fosfomycin resistance bacillithiol transferase	product inactivation
Fos_BSH_Saur-NCBIFAM	FosB1/FosB3 family fosfomycin resistance bacillithiol transferase	product inactivation
Fos_BSH_Sepi-NCBIFAM	FosB family fosfomycin resistance bacillithiol transferase	product inactivation
Fos_BSH-NCBIFAM	FosB/FosD family fosfomycin resistance bacillithiol transferase	product inactivation
Fos_GSH-NCBIFAM	fosfomycin resistance glutathione transferase	product inactivation
fos-Crono-NCBIFAM	FosA family fosfomycin resistance glutathione transferase	product inactivation
FosA-NCBIFAM	FosA family fosfomycin resistance glutathione transferase	product inactivation
fosA5_fam-NCBIFAM	FosA5 family fosfomycin resistance glutathione transferase	product inactivation
fosA7-NCBIFAM	FosA7 family fosfomycin resistance glutathione transferase	product inactivation
fosA8-NCBIFAM	FosA8 family fosfomycin resistance glutathione transferase	product inactivation
FosF-NCBIFAM	fosfomycin resistance glutathione transferase FosF	product inactivation
FosG-NCBIFAM	FosG family fosfomycin resistance glutathione transferase	product inactivation
FosK-NCBIFAM	fosfomycin resistance glutathione transferase FosK	product inactivation
fosM_gen-NCBIFAM	FosM family fosfomycin resistance protein	product inactivation
FosU-NCBIFAM	FosU family fosfomycin resistance glutathione transferase	product inactivation
FosX-NCBIFAM	FosX/FosE/FosI family fosfomycin resistance hydrolase	product inactivation
FOX-MOX-NCBIFAM	FOX/MOX family class C beta-lactamase	product inactivation
fusB-NCBIFAM	FusB family fusidic acid resistance EF-G-binding protein	target protection
fusC-NCBIFAM	FusC family fusidic acid resistance EF-G-binding protein	target protection
fusD-NCBIFAM	FusD family fusidic acid resistance EF-G-binding protein	target protection
fusF-NCBIFAM	fusidic acid resistance EF-G-binding protein FusF	target protection
fusid_est_FusH-NCBIFAM	fusidic acid esterase FusH	product inactivation
glycotrans_Rgt-NCBIFAM	rifamycin-inactivating glycosyltransferase Rgt	product inactivation
HK_VanS_ACDEFG-NCBIFAM	vancomycin resistance histidine kinase VanS	target protection
HK_VanS_B-NCBIFAM	VanB-type vancomycin resistance histidine kinase VanS	target protection
HK_VanS_O-NCBIFAM	VanO-type vancomycin resistance histidine kinase VanS	target protection
L2-NCBIFAM	L2 family class A beta-lactamase	product inactivation
LEN-NCBIFAM	LEN family class A beta-lactamase	product inactivation
linco_LnuA-NCBIFAM	lincosamide nucleotidyltransferase Lnu(A)	product inactivation
linco_LnuAN2-NCBIFAM	lincosamide nucleotidyltransferase Lnu(AN2)	product inactivation
linco_LnuB-NCBIFAM	lincosamide nucleotidyltransferase Lnu(B)	product inactivation
linco_LnuC-NCBIFAM	lincosamide nucleotidyltransferase Lnu(C)	product inactivation
linco_LnuD-NCBIFAM	lincosamide nucleotidyltransferase Lnu(D)	product inactivation
linco_LnuE-NCBIFAM	lincosamide nucleotidyltransferase Lnu(E)	product inactivation
linco_LnuF-NCBIFAM	lincosamide nucleotidyltransferase Lnu(F)	product inactivation
linco_LnuG-NCBIFAM	lincosamide nucleotidyltransferase Lnu(G)	product inactivation
linco_LnuP-NCBIFAM	lincosamide nucleotidyltransferase Lnu(P)	product inactivation
macro_glyco_Mgt-NCBIFAM	macrolide-inactivating glycosyltransferase	product inactivation
macrolide_MefA-NCBIFAM	macrolide efflux MFS transporter Mef(A)	efflux pump
macrolide_MefB-NCBIFAM	macrolide efflux MFS transporter Mef(B)	efflux pump
macrolide_MefC-NCBIFAM	macrolide efflux MFS transporter Mef(C)	efflux pump
macrolide_MefEN2-NCBIFAM	macrolide efflux MFS transporter Mef(En2)	efflux pump
macrolide_MphA-NCBIFAM	Mph(A) family macrolide 2'-phosphotransferase	product inactivation
macrolide_MphB-NCBIFAM	Mph(B) family macrolide 2'-phosphotransferase	product inactivation
macrolide_MphC-NCBIFAM	Mph(C) family macrolide 2'-phosphotransferase	product inactivation
macrolide_MphE-NCBIFAM	Mph(E) family macrolide 2'-phosphotransferase	product inactivation
macrolide_MphF-NCBIFAM	Mph(F) family macrolide 2'-phosphotransferase	product inactivation
macrolide_MphL-NCBIFAM	macrolide 2'-phosphotransferase MphL	product inactivation
macrolide_MphM-NCBIFAM	macrolide 2'-phosphotransferase MphM	product inactivation
MATE_multi_MepA-NCBIFAM	multidrug efflux MATE transporter MepA	efflux pump
MATE_multi_NorM-NCBIFAM	multidrug efflux MATE transporter NorM	efflux pump
MECA_PBP2A-NCBIFAM	PBP2a family beta-lactam-resistant peptidoglycan transpeptidase	target alteration
MECA_pure-NCBIFAM	PBP2a family beta-lactam-resistant peptidoglycan transpeptidase MecA	target alteration
MECA1_pure-NCBIFAM	PBP2a family beta-lactam-resistant peptidoglycan transpeptidase MecA1	target alteration
MECA2_pure-NCBIFAM	PBP2a family beta-lactam-resistant peptidoglycan transpeptidase MecA2	target alteration
MECB_PBP-NCBIFAM	PBP2a family beta-lactam-resistant peptidoglycan transpeptidase MecB	target alteration
MECC_PBP-NCBIFAM	PBP2a family beta-lactam-resistant peptidoglycan transpeptidase MecC	target alteration
MECD_PBP-NCBIFAM	PBP2a family beta-lactam-resistant peptidoglycan transpeptidase MecD	target alteration
MecI_of_mecA-NCBIFAM	mecA-type methicillin resistance repressor MecI	target replacement
MecI_of_mecC-NCBIFAM	mecC-type methicillin resistance repressor MecI	target replacement
merT_RC607-NCBIFAM	mercuric transport protein MerT	efflux pump
MexE-Resfams	Resfams: MexE family multidrug efflux RND transporter periplasmic adaptor subunit	efflux pump
MFS_efflux_PexA-NCBIFAM	phenicol efflux MFS transporter PexA	efflux pump
MFS_efflux_tcmA-NCBIFAM	tetracenomycin C efflux MFS transporter	efflux pump
MOX_CMY1_fam-NCBIFAM	CMY-1/MOX family class C beta-lactamase	product inactivation
MPH_3-NCBIFAM	Mph(E)/Mph(G) family macrolide 2'-phosphotransferase	product inactivation
MsrSA-NCBIFAM	ABC-F type ribosomal protection protein Msr(A)	target protection
MupA-NCBIFAM	mupirocin-resistant isoleucine--tRNA ligase MupA	target alteration
MupB-NCBIFAM	mupirocin-resistant isoleucine--tRNA ligase MupB	target alteration
myrA-NCBIFAM	23S rRNA (guanine(748)-N(1))-methyltransferase MyrA	target alteration
nosihep_NshR-NCBIFAM	NshR family nosiheptide/thiostrepton resistance 23S rRNA methyltransferase	target alteration
NshR_TsnR-NCBIFAM	NshR/TsnR family 23S rRNA methyltransferase	target alteration
OKP-NCBIFAM	OKP family class A broad-spectrum beta-lactamase	product inactivation
OqxA_adapt_sub-NCBIFAM	multidrug efflux RND transporter periplasmic adaptor subunit OqxA	efflux pump
penta_rpt_QnrA-NCBIFAM	QnrA family quinolone resistance pentapeptide repeat protein	target protection
penta_rpt_QnrAS-NCBIFAM	QnrAS family quinolone resistance pentapeptide repeat protein	target protection
penta_rpt_QnrB-NCBIFAM	QnrB family quinolone resistance pentapeptide repeat protein	target protection
penta_rpt_QnrC-NCBIFAM	QnrC family quinolone resistance pentapeptide repeat protein	target protection
penta_rpt_QnrD-NCBIFAM	QnrD family quinolone resistance pentapeptide repeat protein	target protection
penta_rpt_QnrE-NCBIFAM	QnrE family quinolone resistance pentapeptide repeat protein	target protection
penta_rpt_QnrS-NCBIFAM	QnrS family quinolone resistance pentapeptide repeat protein	target protection
penta_rpt_QnrVC-NCBIFAM	QnrVC family quinolone resistance pentapeptide repeat protein	target protection
phos_trans_CPT-NCBIFAM	chloramphenicol phosphotransferase CPT	product inactivation
poly_MCR3_broad-NCBIFAM	MCR-3-related phosphoethanolamine--lipid A transferase	target alteration
polymyxin_MCR1-NCBIFAM	MCR-1 family phosphoethanolamine--lipid A transferase	target alteration
polymyxin_MCR10-NCBIFAM	MCR-10 family phosphoethanolamine--lipid A transferase	target alteration
polymyxin_MCR2-NCBIFAM	MCR-2 family phosphoethanolamine--lipid A transferase	target alteration
polymyxin_MCR3-NCBIFAM	MCR-3 family phosphoethanolamine--lipid A transferase	target alteration
polymyxin_MCR4-NCBIFAM	MCR-4 family phosphoethanolamine--lipid A transferase	target alteration
polymyxin_MCR5-NCBIFAM	MCR-5 family phosphoethanolamine--lipid A transferase	target alteration
polymyxin_MCR6-NCBIFAM	MCR-6 family phosphoethanolamine--lipid A transferase	target alteration
polymyxin_MCR7-NCBIFAM	MCR-7 family phosphoethanolamine--lipid A transferase	target alteration
polymyxin_MCR8-NCBIFAM	MCR-8 family phosphoethanolamine--lipid A transferase	target alteration
polymyxin_MCR9-NCBIFAM	MCR-9 family phosphoethanolamine--lipid A transferase	target alteration
PSE-NCBIFAM	PSE family carbenicillin-hydrolyzing class A beta-lactamase	product inactivation
qac_MFS_AB-NCBIFAM	QacA/B family quaternary ammonium compound efflux MFS transporter	efflux pump
qac_SMR_C-NCBIFAM	quaternary ammonium compound efflux SMR transporter QacC	efflux pump
qac_SMR_G-NCBIFAM	quaternary ammonium compound efflux SMR transporter QacG	efflux pump
qac_SMR_H-NCBIFAM	quaternary ammonium compound efflux SMR transporter QacH	efflux pump
qac_SMR_J-NCBIFAM	quaternary ammonium compound efflux SMR transporter QacJ	efflux pump
QacCGHJ-NCBIFAM	QacCGHJ group quaternary ammonium compound efflux SMR transporter	efflux pump
qepA-NCBIFAM	fluoroquinolone efflux MFS transporter QepA	efflux pump
resist_ArsN1a-NCBIFAM	arsinothricin resistance N-acetyltransferase ArsN1 family A	product inactivation
resist_ArsN1b-NCBIFAM	arsinothricin resistance N-acetyltransferase ArsN1 family B	product inactivation
resist_ArsN2-NCBIFAM	arsenic resistance N-acetyltransferase ArsN2	product inactivation
ribo_prot_ABC_F-NCBIFAM	ABC-F type ribosomal protection protein	target protection
rif_mono_Iri-NCBIFAM	rifampin monooxygenase Iri	product inactivation
rif_monoox-NCBIFAM	rifampin monooxygenase	product inactivation
rifampin_ARR_Ms-NCBIFAM	NAD(+)--rifampin ADP-ribosyltransferase	product inactivation
rifampin_ARR_Sa-NCBIFAM	NAD(+)--rifampin ADP-ribosyltransferase	product inactivation
rifampin_ARR-NCBIFAM	NAD(+)--rifampin ADP-ribosyltransferase	product inactivation
RND_adapt_MexA-NCBIFAM	multidrug efflux RND transporter periplasmic adaptor subunit MexA	efflux pump
RND_perm_OqxB-NCBIFAM	multidrug efflux RND transporter permease subunit OqxB	efflux pump
RPH_KJ151292.1-NCBIFAM	rifamycin-inactivating phosphotransferase Rph	product inactivation
rRNA_meth_EmtA-NCBIFAM	EmtA family 23S rRNA (guanine(2470)) methyltransferase	target alteration
RTG-NCBIFAM	RTG family carbenicillin-hydrolyzing class A beta-lactamase	product inactivation
sat2-NCBIFAM	streptothricin N-acetyltransferase Sat2	product inactivation
sat3-NCBIFAM	streptothricin N-acetyltransferase Sat3	product inactivation
sat4-NCBIFAM	streptothricin N-acetyltransferase Sat4	product inactivation
self_FomB_kinase-NCBIFAM	FomB family phosphonate monophosphate kinase	product inactivation
self_GT_OleI-NCBIFAM	OleI family self-immunity macrolide glycosyltransferase	product inactivation
self_KamB-NCBIFAM	16S rRNA (adenine(1408)-N(1))-methyltransferase KamB	target alteration
sensor_BlaR1-NCBIFAM	beta-lactam sensor/signal transducer BlaR1	product inactivation
sensor_MecR1-NCBIFAM	beta-lactam sensor/signal transducer MecR1	product inactivation
SHV_LEN_OKP-NCBIFAM	SHV/LEN/OKP family class A beta-lactamase	product inactivation
SHV-NCBIFAM	SHV family class A beta-lactamase	product inactivation
SMB1_fam-NCBIFAM	SMB-1 family subclass B3 metallo-beta-lactamase	product inactivation
SMR_efflux_smr-NCBIFAM	multidrug efflux SMR transporter Smr	efflux pump
SMR_qac_bcrB-NCBIFAM	quaternary ammonium compound efflux SMR transporter BcrB	efflux pump
SMR_qac_bcrC-NCBIFAM	quaternary ammonium compound efflux SMR transporter BcrC	efflux pump
SMR_qac_E-NCBIFAM	quaternary ammonium compound efflux SMR transporter QacE	efflux pump
SMR_qac_FL-NCBIFAM	QacF/QacL family quaternary ammonium compound efflux SMR transporter	efflux pump
SMR_qac_G2-NCBIFAM	quaternary ammonium compound efflux SMR transporter QacG2	efflux pump
SMR_qac_int-NCBIFAM	Qac family quaternary ammonium compound efflux SMR transporter	efflux pump
SMR_qac_K-NCBIFAM	quaternary ammonium compound efflux SMR transporter QacK	efflux pump
SMR_qac_pB8-NCBIFAM	Qac-pB8 family quaternary ammonium compound efflux SMR transporter	efflux pump
stat-NCBIFAM	streptothricin N-acetyltransferase STAT	product inactivation
stregra_B_VgbA-NCBIFAM	streptogramin B lyase Vgb(A)	product inactivation
stregra_B_VgbB-NCBIFAM	streptogramin B lyase Vgb(B)	product inactivation
stregram_VatA-NCBIFAM	streptogramin A O-acetyltransferase Vat(A)	product inactivation
stregram_VatC-NCBIFAM	streptogramin A O-acetyltransferase Vat(C)	product inactivation
stregram_VatD-NCBIFAM	streptogramin A O-acetyltransferase Vat(D)	product inactivation
stregram_VatE-NCBIFAM	streptogramin A O-acetyltransferase Vat(E)	product inactivation
stregram_VatF-NCBIFAM	streptogramin A O-acetyltransferase Vat(F)	product inactivation
stregram_VatH-NCBIFAM	streptogramin A O-acetyltransferase Vat(H)	product inactivation
stregram_VatI-NCBIFAM	streptogramin A O-acetyltransferase Vat(I)	product inactivation
SubclassA2-NCBIFAM	class A beta-lactamase, subclass A2	product inactivation
Sul1-NCBIFAM	sulfonamide-resistant dihydropteroate synthase Sul1	target alteration
Sul2-NCBIFAM	sulfonamide-resistant dihydropteroate synthase Sul2	target alteration
Sul3-NCBIFAM	sulfonamide-resistant dihydropteroate synthase Sul3	target alteration
Sul4-NCBIFAM	sulfonamide-resistant dihydropteroate synthase Sul4	target alteration
tet_ABC_46_A-NCBIFAM	tetracycline efflux ABC transporter Tet(46) subunit A	efflux pump
tet_ABC_46_B-NCBIFAM	tetracycline efflux ABC transporter Tet(46) subunit B	efflux pump
tet_ABC_AB_A-NCBIFAM	tetracycline efflux ABC transporter TetAB subunit A	efflux pump
tet_ABC_AB_B-NCBIFAM	tetracycline efflux ABC transporter TetAB subunit B	efflux pump
tet_destruct-NCBIFAM	tetracycline destructase	product inactivation
tet_MFS_38-NCBIFAM	tetracycline efflux MFS transporter Tet(38)	efflux pump
tet_MFS_40-NCBIFAM	tetracycline efflux MFS transporter Tet(40)	efflux pump
tet_MFS_42-NCBIFAM	tetracycline efflux MFS transporter Tet(42)	efflux pump
tet_MFS_43-NCBIFAM	tetracycline efflux MFS transporter Tet(43)	efflux pump
tet_MFS_45-NCBIFAM	tetracycline efflux MFS transporter Tet(45)	efflux pump
tet_MFS_A_B_C_D-NCBIFAM	Tet(A)/Tet(B)/Tet(C) family tetracycline efflux MFS transporter	efflux pump
tet_MFS_A-NCBIFAM	tetracycline efflux MFS transporter Tet(A)	efflux pump
tet_MFS_B-NCBIFAM	tetracycline efflux MFS transporter Tet(B)	efflux pump
tet_MFS_C-NCBIFAM	tetracycline efflux MFS transporter Tet(C)	efflux pump
tet_MFS_D-NCBIFAM	tetracycline efflux MFS transporter Tet(D)	efflux pump
tet_MFS_E-NCBIFAM	tetracycline efflux MFS transporter Tet(E)	efflux pump
tet_MFS_G-NCBIFAM	tetracycline efflux MFS transporter Tet(G)	efflux pump
tet_MFS_H_J-NCBIFAM	Tet(H)/Tet(J) family tetracycline efflux MFS transporter	efflux pump
tet_MFS_H-NCBIFAM	tetracycline efflux MFS transporter Tet(H)	efflux pump
tet_MFS_J-NCBIFAM	tetracycline efflux MFS transporter Tet(J)	efflux pump
tet_MFS_K-NCBIFAM	tetracycline efflux MFS transporter Tet(K)	efflux pump
tet_MFS_L_K_45-NCBIFAM	Tet(L)/Tet(K)/Tet(45) family tetracycline efflux MFS transporter	efflux pump
tet_MFS_L-NCBIFAM	tetracycline efflux MFS transporter Tet(L)	efflux pump
tet_MFS_OtrB-NCBIFAM	oxytetracycline resistance efflux MFS transporter OtrB	efflux pump
tet_MFS_P_a-NCBIFAM	tetracycline efflux MFS transporter TetA(P)	efflux pump
tet_MFS_Tcr3-NCBIFAM	tetracycline efflux MFS transporter Tcr3	efflux pump
tet_MFS_V-NCBIFAM	tetracycline efflux MFS transporter Tet(V)	efflux pump
tet_MFS_Y-NCBIFAM	tetracycline efflux MFS transporter Tet(Y)	efflux pump
tet_monoox_X-NCBIFAM	tetracycline-inactivating monooxygenase Tet(X)	product inactivation
tet_NaH_anti_35-NCBIFAM	tetracycline efflux Na+/H+ antiporter family transporter Tet(35)	efflux pump
tet_protect_M_W-NCBIFAM	TetM/TetW/TetO/TetS family tetracycline resistance ribosomal protection protein	target protection
tet_protect_M-NCBIFAM	tetracycline resistance ribosomal protection protein Tet(M)	target protection
tet_protect_Q-NCBIFAM	tetracycline resistance ribosomal protection protein Tet(Q)	target protection
tet_protect-NCBIFAM	tetracycline resistance ribosomal protection protein	target protection
tet_prtrans_34-NCBIFAM	oxytetracycline resistance phosphoribosyltransferase domain-containing protein Tet(34)	target alteration
tet_redox_37-NCBIFAM	tetracycline resistance NADPH-dependent oxidoreductase Tet(37)	product inactivation
TlmB-NCBIFAM	bleomycin family antibiotic N-acetyltransferase TlmB	product inactivation
trans_MerF-NCBIFAM	mercury resistance system transport protein MerF	efflux pump
trans_reg_VanU-NCBIFAM	glycopeptide resistance transcriptional regulator VanU	target alteration
transport_merC-NCBIFAM	organomercurial transporter MerC	efflux pump
trim_DfrA1_like-NCBIFAM	trimethoprim-resistant dihydrofolate reductase DfrA	target replacement
trim_DfrA1_rpt-NCBIFAM	trimethoprim-resistant repeat-containing dihydrofolate reductase DfrA1	target replacement
trim_DfrA10-NCBIFAM	trimethoprim-resistant dihydrofolate reductase DfrA10	target replacement
trim_DfrA12_A21-NCBIFAM	DfrA12/DfrA21 family trimethoprim-resistant dihydrofolate reductase	target replacement
trim_DfrA12-NCBIFAM	trimethoprim-resistant dihydrofolate reductase DfrA12	target replacement
trim_DfrA18-NCBIFAM	trimethoprim-resistant dihydrofolate reductase DfrA18	target replacement
trim_DfrA19-NCBIFAM	trimethoprim-resistant dihydrofolate reductase DfrA19	target replacement
trim_DfrA20-NCBIFAM	trimethoprim-resistant dihydrofolate reductase DfrA20	target replacement
trim_DfrA23-NCBIFAM	trimethoprim-resistant dihydrofolate reductase DfrA23	target replacement
trim_DfrA24-NCBIFAM	trimethoprim-resistant dihydrofolate reductase DfrA24	target replacement
trim_DfrA26-NCBIFAM	trimethoprim-resistant dihydrofolate reductase DfrA26	target replacement
trim_DfrA3-NCBIFAM	trimethoprim-resistant dihydrofolate reductase DfrA3	target replacement
trim_DfrA35-NCBIFAM	trimethoprim-resistant dihydrofolate reductase DfrA35	target replacement
trim_DfrA36-NCBIFAM	trimethoprim-resistant dihydrofolate reductase DfrA36	target replacement
trim_DfrA3b-NCBIFAM	trimethoprim-resistant dihydrofolate reductase DfrA3b	target replacement
trim_DfrA8-NCBIFAM	trimethoprim-resistant dihydrofolate reductase DfrA8	target replacement
trim_DfrA9-NCBIFAM	trimethoprim-resistant dihydrofolate reductase DfrA9	target replacement
trim_DfrB-NCBIFAM	trimethoprim-resistant dihydrofolate reductase DfrB	target replacement
trim_DfrD-NCBIFAM	trimethoprim-resistant dihydrofolate reductase DfrD	target replacement
trim_DfrDGK-NCBIFAM	DfrD/DfrG/DfrK family trimethoprim-resistant dihydrofolate reductase	target replacement
trim_DfrE-NCBIFAM	trimethoprim-resistant dihydrofolate reductase DfrE	target replacement
trim_DfrF-NCBIFAM	trimethoprim-resistant dihydrofolate reductase DfrF	target replacement
trim_DfrG-NCBIFAM	trimethoprim-resistant dihydrofolate reductase DfrG	target replacement
trim_DfrI-NCBIFAM	trimethoprim-resistant dihydrofolate reductase DfrI	target replacement
VanC1_ser_lig-NCBIFAM	D-alanine--D-serine ligase VanC1	target alteration
vanH_Agroup-NCBIFAM	VanH-A/VanH-Pt family D-lactate dehydrogenase	target alteration
vanH_gen-NCBIFAM	D-lactate dehydrogenase VanH	target alteration
vanH-Ac1-NCBIFAM	D-lactate dehydrogenase VanH-Ac1	target alteration
vanH-Amyco-NCBIFAM	VanH-AOV family D-lactate dehydrogenase	target alteration
vanH-D-NCBIFAM	D-lactate dehydrogenase VanH-D	target alteration
vanH-Sc-NCBIFAM	D-lactate dehydrogenase VanH-Sc	target alteration
vanJ-NCBIFAM	teicoplanin resistance protein VanJ	target alteration
vanR_ACDEGLN-NCBIFAM	VanR-ABDEGLN family response regulator transcription factor	target alteration
vanR_FM-NCBIFAM	VanR-FM family response regulator transcription factor	target alteration
vanR-A-NCBIFAM	VanA-type vancomycin resistance DNA-binding response regulator VanR	target alteration
vanR-B-NCBIFAM	VanB-type vancomycin resistance response regulator transcription factor VanR	target alteration
vanR-C-NCBIFAM	VanC-type vancomycin resistance DNA-binding response regulator VanR	target alteration
vanR-D-NCBIFAM	VanD-type vancomycin resistance DNA-binding response regulator VanR	target alteration
vanR-O-NCBIFAM	VanO-type vancomycin resistance response regulator transcription factor VanR	target alteration
vanT-CELN-NCBIFAM	membrane-bound serine racemase VanT	target alteration
vanT-G-Cterm-NCBIFAM	serine racemase VanT catalytic subunit	target alteration
vanT-L-cat-NCBIFAM	serine racemase VanT-L catalytic subunit	target alteration
vanT-L-mem-NCBIFAM	serine racemase VanT-L membrane subunit	target alteration
vanW-B-NCBIFAM	glycopeptide resistance accessory protein VanW-B	target alteration
vanW-G-NCBIFAM	glycopeptide resistance accessory protein VanW-G	target alteration
vanW-gen-NCBIFAM	glycopeptide resistance accessory protein VanW	target alteration
vanXY_G-NCBIFAM	D-Ala-D-Ala dipeptidase/D-Ala-D-Ala carboxypeptidase VanXY-G	target alteration
vanXY-NCBIFAM	D,D-carboxypeptidase/D,D-dipeptidase VanXY	target alteration
vanY_AFMPt-NCBIFAM	VanY-A/VanY-F/VanY-M family D-Ala-D-Ala carboxypeptidase	target alteration
vanY_BG-NCBIFAM	VanY-B/VanY-G family D-Ala-D-Ala carboxypeptidase	target alteration
vanY_far-NCBIFAM	D,D-peptidase/D,D-carboxypeptidase VanY-N	target alteration
vanY_of_D-NCBIFAM	transpeptidase-like D-Ala-D-Ala carboxypeptidase VanY-D	target alteration
vanZ-A-NCBIFAM	glycopeptide resistance protein VanZ-A	target alteration
vanZ-F-NCBIFAM	glycopeptide resistance protein VanZ-F	target alteration
vanZ-Pt-NCBIFAM	glycopeptide resistance protein VanZ-Pt	target alteration
VarG_fam_MBL-NCBIFAM	VarG family subclass B1-like metallo-beta-lactamase	product inactivation
Vat_ABCDEFH-NCBIFAM	Vat family streptogramin A O-acetyltransferase	product inactivation
viomycin_Vph-NCBIFAM	viomycin phosphotransferase	product inactivation
YadA_autotrans-NCBIFAM	trimeric autotransporter adhesin YadA	efflux pump
zbmA-NCBIFAM	zorbamycin binding protein ZbmA	product inactivation

## Sheet: uniprotrg_index
Supplementary Table S1. Resistance Gene Index of UniProt (Swiss-Prot)
UniProt ID (2785)	Description	Resistance mechanism
A0A059WYP6	Flavin-dependent monooxygenase	efflux pump
A0A0H2ZNL3	UDP-N-acetylglucosamine 1-carboxyvinyltransferase	target alteration
A0A0H3JML2	Phosphoethanolamine transferase EptA	target alteration
A0A0H3M5L9	Multidrug efflux pump Tap	efflux pump
A0A0H4TXY1	Flavin-dependent monooxygenase	efflux pump
A0A0R6L508	Probable phosphatidylethanolamine transferase Mcr-1	target alteration
A0A1C7E424	Na(+), Li(+), K(+)/H(+) antiporter	efflux pump
A0B212	Macrolide export ATP-binding/permease protein MacB	efflux pump
A0JWX7	Undecaprenyl-diphosphatase	target alteration
A0K593	Undecaprenyl-diphosphatase 1	target alteration
A0K6E4	Undecaprenyl-diphosphatase 2	target alteration
A0KGB3	Macrolide export ATP-binding/permease protein MacB 1	efflux pump
A0KGK4	Multidrug resistance protein MdtH	efflux pump
A0KGY4	Undecaprenyl phosphate-alpha-4-amino-4-deoxy-L-arabinose arabinosyl transferase	target alteration
A0KGY6	Bifunctional polymyxin resistance protein ArnA	target alteration
A0KGY7	Undecaprenyl-phosphate 4-deoxy-4-formamido-L-arabinose transferase	target alteration
A0KMJ3	Macrolide export ATP-binding/permease protein MacB 2	efflux pump
A0KQI1	Undecaprenyl-diphosphatase	target alteration
A0KZT4	Undecaprenyl-diphosphatase	target alteration
A0L0V9	Macrolide export ATP-binding/permease protein MacB	efflux pump
A0L190	Multidrug resistance protein MdtL	efflux pump
A0L9F4	Undecaprenyl-diphosphatase	target alteration
A0LG71	Undecaprenyl-diphosphatase	target alteration
A0LM36	Macrolide export ATP-binding/permease protein MacB	efflux pump
A0LSX9	Undecaprenyl-diphosphatase	target alteration
A0M5T6	Undecaprenyl-diphosphatase	target alteration
A0PQW1	Undecaprenyl-diphosphatase	target alteration
A0PWB4	Response regulator MprA	efflux pump
A0Q210	Undecaprenyl-diphosphatase	target alteration
A0QBQ9	Response regulator MprA	efflux pump
A0QGK1	Undecaprenyl-diphosphatase	target alteration
A0QSY0	Pentapeptide repeat protein MfpA	target protection
A0QWU7	Probable triacylglyceride transporter MSMEG_3069/MSMEI_2992	efflux pump
A0QZ11	RNA polymerase-binding protein RbpA	target protection
A0QZY5	Undecaprenyl-diphosphatase	target alteration
A0R1Y1	Virginiamycin B lyase	product inactivation
A0R3I8	Response regulator MprA	efflux pump
A0R5K5	Multidrug efflux pump LfrA	efflux pump
A0R8Y3	Undecaprenyl-diphosphatase 1	target alteration
A0R9W6	Undecaprenyl-diphosphatase 2	target alteration
A0RBJ8	Undecaprenyl-diphosphatase 3	target alteration
A0RD31	Metallothiol transferase FosB	product inactivation
A0RET0	Undecaprenyl-diphosphatase 4	target alteration
A0RP01	Macrolide export ATP-binding/permease protein MacB	efflux pump
A0RQA9	Undecaprenyl-diphosphatase	target alteration
A1A1M3	Undecaprenyl-diphosphatase	target alteration
A1A9B7	Macrolide export ATP-binding/permease protein MacB 1	efflux pump
A1A9U9	Multidrug resistance protein MdtG	efflux pump
A1A9W0	Multidrug resistance protein MdtH	efflux pump
A1ABE4	Spermidine export protein MdtI	efflux pump
A1ABE5	Spermidine export protein MdtJ	efflux pump
A1ABK4	Multidrug resistance protein MdtK	efflux pump
A1ACT0	Multidrug resistance protein MdtB	efflux pump
A1ACT1	Multidrug resistance protein MdtC	efflux pump
A1ACT2	Putative multidrug resistance protein MdtD	efflux pump
A1ADA6	Undecaprenyl-phosphate 4-deoxy-4-formamido-L-arabinose transferase	target alteration
A1ADA7	Bifunctional polymyxin resistance protein ArnA	target alteration
A1ADA9	Undecaprenyl phosphate-alpha-4-amino-4-deoxy-L-arabinose arabinosyl transferase	target alteration
A1AFX9	Undecaprenyl-diphosphatase	target alteration
A1AHK2	Purine ribonucleoside efflux pump NepI	efflux pump
A1AHP3	Multidrug resistance protein MdtL	efflux pump
A1AV04	Undecaprenyl-diphosphatase	target alteration
A1AW91	Undecaprenyl-diphosphatase	target alteration
A1AZA9	Undecaprenyl-diphosphatase	target alteration
A1B677	Macrolide export ATP-binding/permease protein MacB 1/2	efflux pump
A1BCE9	Macrolide export ATP-binding/permease protein MacB 3	efflux pump
A1BE50	Macrolide export ATP-binding/permease protein MacB	efflux pump
A1BE93	Undecaprenyl-diphosphatase	target alteration
A1JKW8	Putative multidrug resistance protein MdtD	efflux pump
A1JKW9	Multidrug resistance protein MdtC	efflux pump
A1JKX1	Multidrug resistance protein MdtA	efflux pump
A1JN04	Multidrug resistance protein MdtG	efflux pump
A1JPA1	Multidrug resistance protein MdtK	efflux pump
A1JPM4	Undecaprenyl phosphate-alpha-4-amino-4-deoxy-L-arabinose arabinosyl transferase	target alteration
A1JPN5	Bifunctional polymyxin resistance protein ArnA	target alteration
A1JPP5	Undecaprenyl-phosphate 4-deoxy-4-formamido-L-arabinose transferase	target alteration
A1JQW4	Undecaprenyl-diphosphatase	target alteration
A1JRE5	Spermidine export protein MdtI	efflux pump
A1JRE8	Spermidine export protein MdtJ	efflux pump
A1JRQ2	Multidrug resistance protein MdtH	efflux pump
A1K323	Macrolide export ATP-binding/permease protein MacB	efflux pump
A1K3C4	Undecaprenyl-diphosphatase	target alteration
A1KF14	Multidrug efflux ATP-binding/permease protein BCG_0231	efflux pump
A1KHB7	Response regulator MprA	efflux pump
A1KIJ9	Probable triacylglyceride transporter BCG_1471c	efflux pump
A1KKH9	Undecaprenyl-diphosphatase	target alteration
A1KVM7	Undecaprenyl-diphosphatase	target alteration
A1R6P8	Undecaprenyl-diphosphatase	target alteration
A1RG29	Macrolide export ATP-binding/permease protein MacB	efflux pump
A1RMH4	Undecaprenyl-diphosphatase	target alteration
A1S3T2	Undecaprenyl-diphosphatase	target alteration
A1SJZ1	Undecaprenyl-diphosphatase	target alteration
A1SRC7	Undecaprenyl-diphosphatase	target alteration
A1T6B0	Virginiamycin B lyase	product inactivation
A1TAS8	Undecaprenyl-diphosphatase	target alteration
A1TEL7	Response regulator MprA	efflux pump
A1TNT7	Undecaprenyl-diphosphatase	target alteration
A1U0A9	Macrolide export ATP-binding/permease protein MacB	efflux pump
A1U6U1	Undecaprenyl-diphosphatase	target alteration
A1UHV6	Undecaprenyl-diphosphatase	target alteration
A1UJW6	Virginiamycin B lyase	product inactivation
A1UL70	Response regulator MprA	efflux pump
A1V1I5	Undecaprenyl-diphosphatase	target alteration
A1VDC9	Undecaprenyl-diphosphatase	target alteration
A1VLZ3	Undecaprenyl-diphosphatase	target alteration
A1VXT4	Undecaprenyl-diphosphatase	target alteration
A1VYW8	Macrolide export ATP-binding/permease protein MacB	efflux pump
A1W560	Undecaprenyl-diphosphatase	target alteration
A1WK80	Undecaprenyl-diphosphatase	target alteration
A1WUY5	Undecaprenyl-diphosphatase	target alteration
A2AXI2	Ribosomal RNA large subunit methyltransferase Cfr	target alteration
A2BQX7	Undecaprenyl-diphosphatase	target alteration
A2BWT5	Undecaprenyl-diphosphatase	target alteration
A2C1W8	Undecaprenyl-diphosphatase	target alteration
A2C666	Undecaprenyl-diphosphatase	target alteration
A2RCI8	Undecaprenyl-diphosphatase	target alteration
A2RNZ5	Undecaprenyl-diphosphatase	target alteration
A2S9B4	Undecaprenyl-diphosphatase	target alteration
A2SEL8	Undecaprenyl-diphosphatase	target alteration
A3CQ79	Undecaprenyl-diphosphatase	target alteration
A3D1Q8	Undecaprenyl-diphosphatase	target alteration
A3DHS8	Undecaprenyl-diphosphatase	target alteration
A3M3H0	Adhesin Ata autotransporter	efflux pump
A3M8D6	Undecaprenyl-diphosphatase	target alteration
A3MMT3	Undecaprenyl-diphosphatase	target alteration
A3NTZ5	Undecaprenyl-diphosphatase 1	target alteration
A3NYA9	Undecaprenyl-diphosphatase 2	target alteration
A3PCQ0	Undecaprenyl-diphosphatase	target alteration
A3PNJ7	Undecaprenyl-diphosphatase	target alteration
A3Q1C2	Undecaprenyl-diphosphatase	target alteration
A3Q393	Virginiamycin B lyase	product inactivation
A3Q5L9	Response regulator MprA	efflux pump
A3QBM7	Undecaprenyl-diphosphatase	target alteration
A4FF33	Virginiamycin B lyase	product inactivation
A4FFN9	Undecaprenyl-diphosphatase	target alteration
A4G8J0	Undecaprenyl-diphosphatase	target alteration
A4IJS3	Undecaprenyl-diphosphatase	target alteration
A4IS40	Metallothiol transferase FosB	product inactivation
A4QEA1	Undecaprenyl-diphosphatase	target alteration
A4SDF5	Undecaprenyl-diphosphatase	target alteration
A4SHM8	Undecaprenyl-diphosphatase	target alteration
A4SQW8	Undecaprenyl-phosphate 4-deoxy-4-formamido-L-arabinose transferase	target alteration
A4SQW9	Bifunctional polymyxin resistance protein ArnA	target alteration
A4SQX1	Undecaprenyl phosphate-alpha-4-amino-4-deoxy-L-arabinose arabinosyl transferase	target alteration
A4SR87	Multidrug resistance protein MdtH	efflux pump
A4TB90	Undecaprenyl-diphosphatase	target alteration
A4THT4	Undecaprenyl-diphosphatase	target alteration
A4TIM3	Undecaprenyl-phosphate 4-deoxy-4-formamido-L-arabinose transferase	target alteration
A4TIM4	Bifunctional polymyxin resistance protein ArnA	target alteration
A4TIM6	Undecaprenyl phosphate-alpha-4-amino-4-deoxy-L-arabinose arabinosyl transferase	target alteration
A4TIP9	Multidrug resistance protein MdtK	efflux pump
A4TJI9	Spermidine export protein MdtI	efflux pump
A4TJJ0	Spermidine export protein MdtJ	efflux pump
A4TJL9	Multidrug resistance protein MdtH	efflux pump
A4TMR2	Multidrug resistance protein MdtA	efflux pump
A4TMR4	Putative multidrug resistance protein MdtD	efflux pump
A4VLM0	Undecaprenyl-diphosphatase 1	target alteration
A4VNS0	Undecaprenyl-diphosphatase 2	target alteration
A4VXK6	Undecaprenyl-diphosphatase	target alteration
A4W3V2	Undecaprenyl-diphosphatase	target alteration
A4W978	Multidrug resistance protein MdtH	efflux pump
A4W9T2	Multidrug resistance protein MdtK	efflux pump
A4WA57	Spermidine export protein MdtJ	efflux pump
A4WA58	Spermidine export protein MdtI	efflux pump
A4WAM1	Undecaprenyl phosphate-alpha-4-amino-4-deoxy-L-arabinose arabinosyl transferase	target alteration
A4WAM3	Bifunctional polymyxin resistance protein ArnA	target alteration
A4WAM4	Undecaprenyl-phosphate 4-deoxy-4-formamido-L-arabinose transferase	target alteration
A4WCC0	Multidrug resistance protein MdtA	efflux pump
A4WCC1	Multidrug resistance protein MdtB	efflux pump
A4WCC2	Multidrug resistance protein MdtC	efflux pump
A4WCC3	Putative multidrug resistance protein MdtD	efflux pump
A4WEI9	Undecaprenyl-diphosphatase	target alteration
A4WWA0	Undecaprenyl-diphosphatase	target alteration
A4XM19	Undecaprenyl-diphosphatase	target alteration
A4XUB9	Undecaprenyl-diphosphatase	target alteration
A4Y4F7	Undecaprenyl-diphosphatase	target alteration
A4YJM2	Undecaprenyl-diphosphatase	target alteration
A5CRN8	Undecaprenyl-diphosphatase	target alteration
A5CWY7	Undecaprenyl-diphosphatase	target alteration
A5D2Q9	Undecaprenyl-diphosphatase	target alteration
A5E8M5	Undecaprenyl-diphosphatase	target alteration
A5EW93	Undecaprenyl-diphosphatase	target alteration
A5F9D4	Undecaprenyl-diphosphatase	target alteration
A5FWG2	Undecaprenyl-diphosphatase	target alteration
A5GNW2	Undecaprenyl-diphosphatase	target alteration
A5GQQ0	Undecaprenyl-diphosphatase	target alteration
A5HBL2	Ribosomal RNA large subunit methyltransferase Cfr	target alteration
A5I5U3	Ribosomal RNA large subunit methyltransferase Cfr	target alteration
A5IIP0	Undecaprenyl-diphosphatase	target alteration
A5INR0	Sensor protein kinase WalK	target alteration
A5IQL3	Sensor protein kinase GraS	target alteration
A5IQN7	Undecaprenyl-diphosphatase	target alteration
A5ISA3	Probable dual-specificity RNA methyltransferase RlmN	target alteration
A5ISW7	Quinolone resistance protein NorB	efflux pump
A5IUV7	Multidrug resistance efflux pump SepA	efflux pump
A5IVB5	Metallothiol transferase FosB	product inactivation
A5U123	Response regulator MprA	efflux pump
A5U493	Beta-lactamase	product inactivation
A5U4G2	Undecaprenyl-diphosphatase	target alteration
A5V412	Undecaprenyl-diphosphatase	target alteration
A5VVU6	Undecaprenyl-diphosphatase	target alteration
A5W499	Undecaprenyl-diphosphatase	target alteration
A5WCV5	Undecaprenyl-diphosphatase	target alteration
A6H239	Undecaprenyl-diphosphatase	target alteration
A6KZJ8	Undecaprenyl-diphosphatase	target alteration
A6LEL8	Undecaprenyl-diphosphatase	target alteration
A6LJI3	Undecaprenyl-diphosphatase	target alteration
A6LZF4	Virginiamycin B lyase	product inactivation
A6QA78	Undecaprenyl-diphosphatase	target alteration
A6QD58	Sensor protein kinase WalK	target alteration
A6QEW9	Sensor protein kinase GraS	target alteration
A6QEZ2	Undecaprenyl-diphosphatase	target alteration
A6QGB8	Probable dual-specificity RNA methyltransferase RlmN	target alteration
A6QGY6	Quinolone resistance protein NorB	efflux pump
A6QJ09	Multidrug resistance efflux pump SepA	efflux pump
A6QJH4	Metallothiol transferase FosB	product inactivation
A6T273	Undecaprenyl-diphosphatase	target alteration
A6T7D8	Multidrug resistance protein MdtH	efflux pump
A6T8S5	Spermidine export protein MdtJ	efflux pump
A6T8S6	Spermidine export protein MdtI	efflux pump
A6TA11	Multidrug resistance protein MdtK	efflux pump
A6TBH3	Multidrug resistance protein MdtA	efflux pump
A6TBH4	Multidrug resistance protein MdtB	efflux pump
A6TBH5	Multidrug resistance protein MdtC	efflux pump
A6TBH6	Putative multidrug resistance protein MdtD	efflux pump
A6TE36	Undecaprenyl-diphosphatase	target alteration
A6TF96	Undecaprenyl phosphate-alpha-4-amino-4-deoxy-L-arabinose arabinosyl transferase	target alteration
A6TF98	Bifunctional polymyxin resistance protein ArnA	target alteration
A6TF99	Undecaprenyl-phosphate 4-deoxy-4-formamido-L-arabinose transferase	target alteration
A6TG19	Multidrug resistance protein MdtL	efflux pump
A6TW45	Undecaprenyl-diphosphatase	target alteration
A6TXG9	Sensor protein kinase WalK	target alteration
A6TZD7	Sensor protein kinase GraS	target alteration
A6TZG1	Undecaprenyl-diphosphatase	target alteration
A6U137	Probable dual-specificity RNA methyltransferase RlmN	target alteration
A6U1Q6	Quinolone resistance protein NorB	efflux pump
A6U3P7	Multidrug resistance efflux pump SepA	efflux pump
A6U458	Metallothiol transferase FosB	product inactivation
A6UFC2	Undecaprenyl-diphosphatase	target alteration
A6V1N8	Undecaprenyl phosphate-alpha-4-amino-4-deoxy-L-arabinose arabinosyl transferase	target alteration
A6V1P0	Bifunctional polymyxin resistance protein ArnA	target alteration
A6V1P1	Undecaprenyl-phosphate 4-deoxy-4-formamido-L-arabinose transferase	target alteration
A6V6L2	Undecaprenyl-diphosphatase	target alteration
A6VCX3	L-methionine sulfoximine/L-methionine sulfone acetyltransferase	product inactivation
A6W915	Undecaprenyl-diphosphatase	target alteration
A6WKK8	Undecaprenyl-diphosphatase	target alteration
A6WYK2	Undecaprenyl-diphosphatase	target alteration
A7FE74	Undecaprenyl-diphosphatase	target alteration
A7FG15	Putative multidrug resistance protein MdtD	efflux pump
A7FG16	Multidrug resistance protein MdtC	efflux pump
A7FG18	Multidrug resistance protein MdtA	efflux pump
A7FHH4	Bifunctional polymyxin resistance protein ArnA	target alteration
A7FHH6	Undecaprenyl phosphate-alpha-4-amino-4-deoxy-L-arabinose arabinosyl transferase	target alteration
A7FHJ7	Multidrug resistance protein MdtK	efflux pump
A7FIB4	Spermidine export protein MdtI	efflux pump
A7FIB5	Spermidine export protein MdtJ	efflux pump
A7FIE5	Multidrug resistance protein MdtH	efflux pump
A7FX96	Ribosomal RNA large subunit methyltransferase Cfr	target alteration
A7GH77	Ribosomal RNA large subunit methyltransferase Cfr	target alteration
A7GNY8	Metallothiol transferase FosB	product inactivation
A7H0X7	Undecaprenyl-diphosphatase	target alteration
A7H1R9	Undecaprenyl-diphosphatase	target alteration
A7H6N5	Undecaprenyl-diphosphatase	target alteration
A7HJT4	Undecaprenyl-diphosphatase	target alteration
A7HS58	Undecaprenyl-diphosphatase	target alteration
A7I0J2	Undecaprenyl-diphosphatase	target alteration
A7MEJ4	Spermidine export protein MdtJ	efflux pump
A7MEJ5	Spermidine export protein MdtI	efflux pump
A7MFC3	Multidrug resistance protein MdtK	efflux pump
A7MG31	Multidrug resistance protein MdtH	efflux pump
A7MHI9	Putative multidrug resistance protein MdtD	efflux pump
A7MHJ0	Multidrug resistance protein MdtC	efflux pump
A7MHJ1	Multidrug resistance protein MdtB	efflux pump
A7MJT8	Undecaprenyl-diphosphatase	target alteration
A7MWQ3	Undecaprenyl-diphosphatase	target alteration
A7WWQ7	Sensor protein kinase WalK	target alteration
A7WZC5	Sensor protein kinase GraS	target alteration
A7WZF5	Undecaprenyl-diphosphatase	target alteration
A7X1H8	Probable dual-specificity RNA methyltransferase RlmN	target alteration
A7X2C6	Quinolone resistance protein NorB	efflux pump
A7X534	Multidrug resistance efflux pump SepA	efflux pump
A7X5T8	Metallothiol transferase FosB	product inactivation
A7Z1T2	Ribosomal RNA large subunit methyltransferase Cfr	target alteration
A7Z3A4	Metallothiol transferase FosB	product inactivation
A7Z830	Undecaprenyl-diphosphatase	target alteration
A7ZFX1	Undecaprenyl-diphosphatase	target alteration
A7ZKF6	Multidrug resistance protein MdtG	efflux pump
A7ZKH0	Multidrug resistance protein MdtH	efflux pump
A7ZM58	Spermidine export protein MdtI	efflux pump
A7ZM59	Spermidine export protein MdtJ	efflux pump
A7ZMC9	Multidrug resistance protein MdtK	efflux pump
A7ZNP7	Multidrug resistance protein MdtA	efflux pump
A7ZNP8	Multidrug resistance protein MdtB	efflux pump
A7ZNP9	Multidrug resistance protein MdtC	efflux pump
A7ZNQ0	Putative multidrug resistance protein MdtD	efflux pump
A7ZP72	Undecaprenyl-phosphate 4-deoxy-4-formamido-L-arabinose transferase	target alteration
A7ZP73	Bifunctional polymyxin resistance protein ArnA	target alteration
A7ZP75	Undecaprenyl phosphate-alpha-4-amino-4-deoxy-L-arabinose arabinosyl transferase	target alteration
A7ZRT8	Undecaprenyl-diphosphatase	target alteration
A7ZTR5	Multidrug resistance protein MdtL	efflux pump
A7ZZ10	Multidrug resistance protein MdtG	efflux pump
A7ZZ23	Multidrug resistance protein MdtH	efflux pump
A8A0E0	Spermidine export protein MdtI	efflux pump
A8A0E1	Spermidine export protein MdtJ	efflux pump
A8A0L0	Multidrug resistance protein MdtK	efflux pump
A8A1U6	Multidrug resistance protein MdtA	efflux pump
A8A1U7	Multidrug resistance protein MdtB	efflux pump
A8A1U8	Multidrug resistance protein MdtC	efflux pump
A8A1U9	Putative multidrug resistance protein MdtD	efflux pump
A8A2C1	Undecaprenyl-phosphate 4-deoxy-4-formamido-L-arabinose transferase	target alteration
A8A2C2	Bifunctional polymyxin resistance protein ArnA	target alteration
A8A2C4	Undecaprenyl phosphate-alpha-4-amino-4-deoxy-L-arabinose arabinosyl transferase	target alteration
A8A4L2	Undecaprenyl-diphosphatase	target alteration
A8A6H2	Multidrug resistance protein MdtL	efflux pump
A8ACM0	Multidrug resistance protein MdtL	efflux pump
A8AEE4	Putative multidrug resistance protein MdtD	efflux pump
A8AEE5	Multidrug resistance protein MdtC	efflux pump
A8AEE6	Multidrug resistance protein MdtB	efflux pump
A8AGX4	Spermidine export protein MdtI	efflux pump
A8AGX5	Spermidine export protein MdtJ	efflux pump
A8AH48	Multidrug resistance protein MdtK	efflux pump
A8AI11	Multidrug resistance protein MdtH	efflux pump
A8AI28	Multidrug resistance protein MdtG	efflux pump
A8APU0	Undecaprenyl-diphosphatase	target alteration
A8AYY7	Undecaprenyl-diphosphatase	target alteration
A8C927	16S rRNA (adenine(1408)-N(1))-methyltransferase	target alteration
A8FK06	Undecaprenyl-diphosphatase	target alteration
A8FRR0	Undecaprenyl phosphate-alpha-4-amino-4-deoxy-L-arabinose arabinosyl transferase	target alteration
A8FRR2	Bifunctional polymyxin resistance protein ArnA	target alteration
A8FRR3	Undecaprenyl-phosphate 4-deoxy-4-formamido-L-arabinose transferase	target alteration
A8FS68	Undecaprenyl-diphosphatase	target alteration
A8G4L8	Undecaprenyl-diphosphatase	target alteration
A8GCZ5	Multidrug resistance protein MdtG	efflux pump
A8GDR6	Undecaprenyl-phosphate 4-deoxy-4-formamido-L-arabinose transferase	target alteration
A8GDR7	Bifunctional polymyxin resistance protein ArnA	target alteration
A8GDR9	Undecaprenyl phosphate-alpha-4-amino-4-deoxy-L-arabinose arabinosyl transferase	target alteration
A8GFH6	Spermidine export protein MdtI	efflux pump
A8GFH7	Spermidine export protein MdtJ	efflux pump
A8GFK7	Multidrug resistance protein MdtH	efflux pump
A8GHQ9	Multidrug resistance protein MdtB	efflux pump
A8GHR0	Multidrug resistance protein MdtC	efflux pump
A8GHR1	Putative multidrug resistance protein MdtD	efflux pump
A8GJU8	Undecaprenyl-diphosphatase	target alteration
A8H157	Undecaprenyl-diphosphatase	target alteration
A8LQR9	Undecaprenyl-diphosphatase	target alteration
A8MFV5	Undecaprenyl-diphosphatase	target alteration
A8YYD4	Multidrug resistance efflux pump SepA	efflux pump
A8YYU2	Sensor protein kinase WalK	target alteration
A8YZV4	Undecaprenyl-diphosphatase	target alteration
A8Z182	Sensor protein kinase GraS	target alteration
A8Z3Q4	Probable dual-specificity RNA methyltransferase RlmN	target alteration
A8Z415	Quinolone resistance protein NorB	efflux pump
A8Z522	Metallothiol transferase FosB	product inactivation
A8ZXM2	Undecaprenyl-diphosphatase	target alteration
A9GC83	Undecaprenyl-diphosphatase	target alteration
A9HI81	Undecaprenyl-diphosphatase	target alteration
A9HXK3	Undecaprenyl-diphosphatase	target alteration
A9KK15	Ribosomal RNA large subunit methyltransferase Cfr	target alteration
A9KNK1	Undecaprenyl-diphosphatase	target alteration
A9L5I7	Undecaprenyl-diphosphatase	target alteration
A9M2I7	Undecaprenyl-diphosphatase	target alteration
A9MCW8	Undecaprenyl-diphosphatase	target alteration
A9MEJ6	Multidrug resistance protein MdtK	efflux pump
A9MGZ7	Multidrug resistance protein MdtH	efflux pump
A9MH10	Multidrug resistance protein MdtG	efflux pump
A9MJC5	Undecaprenyl phosphate-alpha-4-amino-4-deoxy-L-arabinose arabinosyl transferase	target alteration
A9MJT5	Multidrug resistance protein MdtL	efflux pump
A9MKW9	Multidrug resistance protein MdtC	efflux pump
A9MKX0	Multidrug resistance protein MdtB	efflux pump
A9MPV8	Undecaprenyl-diphosphatase	target alteration
A9MRT8	Spermidine export protein MdtI	efflux pump
A9MRT9	Spermidine export protein MdtJ	efflux pump
A9MWE8	Purine ribonucleoside efflux pump NepI	efflux pump
A9MX86	Multidrug resistance protein MdtL	efflux pump
A9MZZ2	Spermidine export protein MdtI	efflux pump
A9MZZ3	Spermidine export protein MdtJ	efflux pump
A9N0Y8	Multidrug resistance protein MdtK	efflux pump
A9N5B0	Undecaprenyl phosphate-alpha-4-amino-4-deoxy-L-arabinose arabinosyl transferase	target alteration
A9N5B2	Bifunctional polymyxin resistance protein ArnA	target alteration
A9N5B3	Undecaprenyl-phosphate 4-deoxy-4-formamido-L-arabinose transferase	target alteration
A9N5P5	Multidrug resistance protein MdtH	efflux pump
A9N5Q9	Multidrug resistance protein MdtG	efflux pump
A9N7L0	Putative multidrug resistance protein MdtD	efflux pump
A9N7L1	Multidrug resistance protein MdtC	efflux pump
A9N7L2	Multidrug resistance protein MdtB	efflux pump
A9NF64	Undecaprenyl-diphosphatase	target alteration
A9QYW1	Spermidine export protein MdtI	efflux pump
A9QYW2	Spermidine export protein MdtJ	efflux pump
A9QYZ2	Multidrug resistance protein MdtH	efflux pump
A9QZC0	Multidrug resistance protein MdtK	efflux pump
A9QZU7	Putative multidrug resistance protein MdtD	efflux pump
A9QZU8	Multidrug resistance protein MdtC	efflux pump
A9R091	Undecaprenyl phosphate-alpha-4-amino-4-deoxy-L-arabinose arabinosyl transferase	target alteration
A9R093	Bifunctional polymyxin resistance protein ArnA	target alteration
A9R094	Undecaprenyl-phosphate 4-deoxy-4-formamido-L-arabinose transferase	target alteration
A9R4E0	Multidrug transporter MdfA	efflux pump
A9R7E0	Undecaprenyl-diphosphatase	target alteration
A9VQJ9	Virginiamycin B lyase	product inactivation
A9VRT9	Metallothiol transferase FosB	product inactivation
A9WSJ0	Undecaprenyl-diphosphatase	target alteration
A9WW52	Undecaprenyl-diphosphatase	target alteration
B0C1T8	Undecaprenyl-diphosphatase	target alteration
B0K0H2	Undecaprenyl-diphosphatase	target alteration
B0K909	Undecaprenyl-diphosphatase	target alteration
B0KUY1	Undecaprenyl-diphosphatase	target alteration
B0S9E8	Undecaprenyl-diphosphatase	target alteration
B0SS37	Undecaprenyl-diphosphatase	target alteration
B0T669	Undecaprenyl-diphosphatase	target alteration
B0TIP2	Undecaprenyl-diphosphatase	target alteration
B0VEM6	Undecaprenyl-diphosphatase	target alteration
B0VS31	Undecaprenyl-diphosphatase	target alteration
B1HZM2	Metallothiol transferase FosB	product inactivation
B1I2Y8	Undecaprenyl-diphosphatase	target alteration
B1I9P6	Undecaprenyl-diphosphatase	target alteration
B1IBM3	UDP-N-acetylglucosamine 1-carboxyvinyltransferase	target alteration
B1IL14	Ribosomal RNA large subunit methyltransferase Cfr	target alteration
B1IQ91	Multidrug resistance protein MdtK	efflux pump
B1IQZ0	Spermidine export protein MdtJ	efflux pump
B1IQZ1	Spermidine export protein MdtI	efflux pump
B1IRQ9	Undecaprenyl-diphosphatase	target alteration
B1IV37	Multidrug resistance protein MdtH	efflux pump
B1IV49	Multidrug resistance protein MdtG	efflux pump
B1IX28	Multidrug resistance protein MdtL	efflux pump
B1IXT0	Undecaprenyl phosphate-alpha-4-amino-4-deoxy-L-arabinose arabinosyl transferase	target alteration
B1IXT2	Bifunctional polymyxin resistance protein ArnA	target alteration
B1IXT3	Undecaprenyl-phosphate 4-deoxy-4-formamido-L-arabinose transferase	target alteration
B1IYZ7	Putative multidrug resistance protein MdtD	efflux pump
B1IYZ8	Multidrug resistance protein MdtC	efflux pump
B1IYZ9	Multidrug resistance protein MdtB	efflux pump
B1J8R9	Undecaprenyl-diphosphatase	target alteration
B1JJ29	Undecaprenyl-phosphate 4-deoxy-4-formamido-L-arabinose transferase	target alteration
B1JJ30	Bifunctional polymyxin resistance protein ArnA	target alteration
B1JJ32	Undecaprenyl phosphate-alpha-4-amino-4-deoxy-L-arabinose arabinosyl transferase	target alteration
B1JJ53	Multidrug resistance protein MdtK	efflux pump
B1JLJ7	Spermidine export protein MdtI	efflux pump
B1JLJ8	Spermidine export protein MdtJ	efflux pump
B1JLM7	Multidrug resistance protein MdtH	efflux pump
B1JM21	Undecaprenyl-diphosphatase	target alteration
B1JSD2	Putative multidrug resistance protein MdtD	efflux pump
B1JSD3	Multidrug resistance protein MdtC	efflux pump
B1JSD5	Multidrug resistance protein MdtA	efflux pump
B1KHE6	Undecaprenyl-diphosphatase	target alteration
B1KZ37	Ribosomal RNA large subunit methyltransferase Cfr	target alteration
B1LC41	Undecaprenyl-diphosphatase	target alteration
B1LEM1	Multidrug resistance protein MdtK	efflux pump
B1LET6	Spermidine export protein MdtJ	efflux pump
B1LET7	Spermidine export protein MdtI	efflux pump
B1LIU5	Multidrug resistance protein MdtH	efflux pump
B1LIV8	Multidrug resistance protein MdtG	efflux pump
B1LL36	Multidrug resistance protein MdtL	efflux pump
B1LLK8	Undecaprenyl-phosphate 4-deoxy-4-formamido-L-arabinose transferase	target alteration
B1LLK9	Bifunctional polymyxin resistance protein ArnA	target alteration
B1LLL1	Undecaprenyl phosphate-alpha-4-amino-4-deoxy-L-arabinose arabinosyl transferase	target alteration
B1LNW4	Putative multidrug resistance protein MdtD	efflux pump
B1LNW5	Multidrug resistance protein MdtC	efflux pump
B1LNW6	Multidrug resistance protein MdtB	efflux pump
B1LNW7	Multidrug resistance protein MdtA	efflux pump
B1MM05	Flavin-dependent monooxygenase	efflux pump
B1MW96	Undecaprenyl-diphosphatase	target alteration
B1W4P7	Undecaprenyl-diphosphatase	target alteration
B1X7H0	Multidrug resistance protein MdtA	efflux pump
B1X7H1	Multidrug resistance protein MdtB	efflux pump
B1X7H2	Multidrug resistance protein MdtC	efflux pump
B1X7H3	Putative multidrug resistance protein MdtD	efflux pump
B1X8W7	Undecaprenyl-phosphate 4-deoxy-4-formamido-L-arabinose transferase	target alteration
B1X8W8	Bifunctional polymyxin resistance protein ArnA	target alteration
B1X8X0	Undecaprenyl phosphate-alpha-4-amino-4-deoxy-L-arabinose arabinosyl transferase	target alteration
B1X9G6	Multidrug resistance protein MdtG	efflux pump
B1X9H8	Multidrug resistance protein MdtH	efflux pump
B1X9T9	Multidrug resistance protein MdtL	efflux pump
B1XF64	Spermidine export protein MdtI	efflux pump
B1XF65	Spermidine export protein MdtJ	efflux pump
B1XFX3	Multidrug resistance protein MdtK	efflux pump
B1XG62	Undecaprenyl-diphosphatase	target alteration
B1XTA2	Undecaprenyl-diphosphatase	target alteration
B1YIX1	Undecaprenyl-diphosphatase	target alteration
B2FHB6	Undecaprenyl-diphosphatase	target alteration
B2GDY8	Undecaprenyl-diphosphatase	target alteration
B2GIP7	Undecaprenyl-diphosphatase	target alteration
B2HFY7	Undecaprenyl-diphosphatase	target alteration
B2HXY4	Undecaprenyl-diphosphatase	target alteration
B2IM77	Undecaprenyl-diphosphatase	target alteration
B2K2I0	Undecaprenyl-diphosphatase	target alteration
B2K306	Multidrug resistance protein MdtH	efflux pump
B2K336	Spermidine export protein MdtJ	efflux pump
B2K337	Spermidine export protein MdtI	efflux pump
B2K5I9	Multidrug resistance protein MdtK	efflux pump
B2K5L1	Undecaprenyl phosphate-alpha-4-amino-4-deoxy-L-arabinose arabinosyl transferase	target alteration
B2K5L3	Bifunctional polymyxin resistance protein ArnA	target alteration
B2K5L4	Undecaprenyl-phosphate 4-deoxy-4-formamido-L-arabinose transferase	target alteration
B2K9L9	Multidrug resistance protein MdtA	efflux pump
B2K9M1	Multidrug resistance protein MdtC	efflux pump
B2K9M2	Putative multidrug resistance protein MdtD	efflux pump
B2KE93	Undecaprenyl-diphosphatase	target alteration
B2RI48	Lipid A 4'-phosphatase	target alteration
B2RI95	Undecaprenyl-diphosphatase	target alteration
B2RZW9	Undecaprenyl-diphosphatase	target alteration
B2SC28	Undecaprenyl-diphosphatase	target alteration
B2SHN5	Undecaprenyl-diphosphatase	target alteration
B2TTK5	Multidrug resistance protein MdtH	efflux pump
B2TUR5	Multidrug resistance protein MdtL	efflux pump
B2TW38	Putative bifunctional polymyxin resistance protein ArnA	target alteration
B2TW40	Undecaprenyl phosphate-alpha-4-amino-4-deoxy-L-arabinose arabinosyl transferase	target alteration
B2TYA6	Putative multidrug resistance protein MdtD	efflux pump
B2TYA7	Multidrug resistance protein MdtC	efflux pump
B2TYA8	Multidrug resistance protein MdtB	efflux pump
B2TYA9	Multidrug resistance protein MdtA	efflux pump
B2U1G1	Undecaprenyl-diphosphatase	target alteration
B2U1Q8	Spermidine export protein MdtI	efflux pump
B2U1Q9	Spermidine export protein MdtJ	efflux pump
B2U2G8	Multidrug resistance protein MdtK	efflux pump
B2U7E0	Undecaprenyl-diphosphatase	target alteration
B2V5I7	Undecaprenyl-diphosphatase	target alteration
B2VBI7	Undecaprenyl phosphate-alpha-4-amino-4-deoxy-L-arabinose arabinosyl transferase	target alteration
B2VBI9	Bifunctional polymyxin resistance protein ArnA	target alteration
B2VBJ0	Undecaprenyl-phosphate 4-deoxy-4-formamido-L-arabinose transferase	target alteration
B2VFQ4	Multidrug resistance protein MdtC	efflux pump
B2VGJ3	Undecaprenyl-diphosphatase	target alteration
B3DRX3	Undecaprenyl-diphosphatase	target alteration
B3E171	Undecaprenyl-diphosphatase	target alteration
B3E340	Undecaprenyl-diphosphatase	target alteration
B3EEG6	Undecaprenyl-diphosphatase	target alteration
B3ELU5	Undecaprenyl-diphosphatase	target alteration
B3PI58	Undecaprenyl-diphosphatase	target alteration
B3PYJ1	Undecaprenyl-diphosphatase	target alteration
B3Q5X8	Undecaprenyl-diphosphatase	target alteration
B3QQ95	Undecaprenyl-diphosphatase	target alteration
B3QW96	Undecaprenyl-diphosphatase	target alteration
B3U538	Beta-lactamase OXA-133	product inactivation
B3WCK5	Undecaprenyl-diphosphatase	target alteration
B4ETL6	Undecaprenyl-phosphate 4-deoxy-4-formamido-L-arabinose transferase	target alteration
B4ETL7	Bifunctional polymyxin resistance protein ArnA	target alteration
B4ETL9	Undecaprenyl phosphate-alpha-4-amino-4-deoxy-L-arabinose arabinosyl transferase 2	target alteration
B4ETN1	Multidrug resistance protein MdtH	efflux pump
B4EUL1	Undecaprenyl phosphate-alpha-4-amino-4-deoxy-L-arabinose arabinosyl transferase 1	target alteration
B4EVU5	Spermidine export protein MdtJ	efflux pump
B4EWN4	Multidrug resistance protein MdtK	efflux pump
B4EY99	Multidrug resistance protein MdtA	efflux pump
B4EYA1	Multidrug resistance protein MdtC	efflux pump
B4EYY4	Multidrug resistance protein MdtG	efflux pump
B4RCI1	Undecaprenyl-diphosphatase	target alteration
B4RQE0	Undecaprenyl-diphosphatase	target alteration
B4RY28	Undecaprenyl-diphosphatase	target alteration
B4S3H1	Undecaprenyl-diphosphatase	target alteration
B4SDS7	Undecaprenyl-diphosphatase	target alteration
B4SRU3	Undecaprenyl-diphosphatase	target alteration
B4SXW0	Multidrug resistance protein MdtB	efflux pump
B4SXW1	Multidrug resistance protein MdtC	efflux pump
B4SXW2	Putative multidrug resistance protein MdtD	efflux pump
B4SYB3	Multidrug resistance protein MdtL	efflux pump
B4SYX0	Undecaprenyl-phosphate 4-deoxy-4-formamido-L-arabinose transferase	target alteration
B4SYX1	Bifunctional polymyxin resistance protein ArnA	target alteration
B4SYX3	Undecaprenyl phosphate-alpha-4-amino-4-deoxy-L-arabinose arabinosyl transferase	target alteration
B4T2Y5	Multidrug resistance protein MdtG	efflux pump
B4T2Z8	Multidrug resistance protein MdtH	efflux pump
B4T562	Multidrug resistance protein MdtK	efflux pump
B4T5B8	Spermidine export protein MdtJ	efflux pump
B4T5B9	Spermidine export protein MdtI	efflux pump
B4T675	Undecaprenyl-diphosphatase	target alteration
B4T9U0	Multidrug resistance protein MdtA	efflux pump
B4T9U1	Multidrug resistance protein MdtB	efflux pump
B4T9U2	Multidrug resistance protein MdtC	efflux pump
B4T9U3	Putative multidrug resistance protein MdtD	efflux pump
B4TAV4	Multidrug resistance protein MdtL	efflux pump
B4TBG5	Undecaprenyl-phosphate 4-deoxy-4-formamido-L-arabinose transferase	target alteration
B4TBG6	Bifunctional polymyxin resistance protein ArnA	target alteration
B4TBG8	Undecaprenyl phosphate-alpha-4-amino-4-deoxy-L-arabinose arabinosyl transferase	target alteration
B4TES5	Multidrug resistance protein MdtG	efflux pump
B4TET8	Multidrug resistance protein MdtH	efflux pump
B4TH65	Multidrug resistance protein MdtK	efflux pump
B4THR3	Spermidine export protein MdtJ	efflux pump
B4THR4	Spermidine export protein MdtI	efflux pump
B4TI56	Undecaprenyl-diphosphatase	target alteration
B4TN12	Multidrug resistance protein MdtL	efflux pump
B4TNI6	Multidrug resistance protein MdtB	efflux pump
B4TNI7	Multidrug resistance protein MdtC	efflux pump
B4TNI8	Putative multidrug resistance protein MdtD	efflux pump
B4TPI1	Undecaprenyl-phosphate 4-deoxy-4-formamido-L-arabinose transferase	target alteration
B4TPI2	Bifunctional polymyxin resistance protein ArnA	target alteration
B4TPI4	Undecaprenyl phosphate-alpha-4-amino-4-deoxy-L-arabinose arabinosyl transferase	target alteration
B4TSR5	Multidrug resistance protein MdtG	efflux pump
B4TTD0	Multidrug resistance protein MdtH	efflux pump
B4TUY3	Multidrug resistance protein MdtK	efflux pump
B4TVE8	Spermidine export protein MdtJ	efflux pump
B4TVE9	Spermidine export protein MdtI	efflux pump
B4TVT9	Undecaprenyl-diphosphatase	target alteration
B4U4X0	Undecaprenyl-diphosphatase	target alteration
B4ULG0	Undecaprenyl-diphosphatase	target alteration
B5BBC3	Multidrug resistance protein MdtH	efflux pump
B5BBD5	Multidrug resistance protein MdtG	efflux pump
B5BCP4	Undecaprenyl phosphate-alpha-4-amino-4-deoxy-L-arabinose arabinosyl transferase	target alteration
B5BCP6	Bifunctional polymyxin resistance protein ArnA	target alteration
B5BCP7	Undecaprenyl-phosphate 4-deoxy-4-formamido-L-arabinose transferase	target alteration
B5BF67	Putative multidrug resistance protein MdtD	efflux pump
B5BF68	Multidrug resistance protein MdtC	efflux pump
B5BF69	Multidrug resistance protein MdtB	efflux pump
B5BG16	Undecaprenyl-diphosphatase	target alteration
B5BIG3	Purine ribonucleoside efflux pump NepI	efflux pump
B5BIM0	Multidrug resistance protein MdtL	efflux pump
B5BK90	Spermidine export protein MdtJ	efflux pump
B5BKE4	Multidrug resistance protein MdtK	efflux pump
B5E1R8	Undecaprenyl-diphosphatase	target alteration
B5EXV7	Multidrug resistance protein MdtB	efflux pump
B5EXV8	Multidrug resistance protein MdtC	efflux pump
B5EXV9	Putative multidrug resistance protein MdtD	efflux pump
B5EYX7	Multidrug resistance protein MdtL	efflux pump
B5EZH7	Undecaprenyl-phosphate 4-deoxy-4-formamido-L-arabinose transferase	target alteration
B5EZH8	Bifunctional polymyxin resistance protein ArnA	target alteration
B5EZI0	Undecaprenyl phosphate-alpha-4-amino-4-deoxy-L-arabinose arabinosyl transferase	target alteration
B5F6A1	Undecaprenyl-diphosphatase	target alteration
B5F6G3	Spermidine export protein MdtI	efflux pump
B5F6G4	Spermidine export protein MdtJ	efflux pump
B5F6M2	Multidrug resistance protein MdtK	efflux pump
B5F941	Multidrug resistance protein MdtH	efflux pump
B5F954	Multidrug resistance protein MdtG	efflux pump
B5FB78	Undecaprenyl-diphosphatase	target alteration
B5FHS1	Spermidine export protein MdtI	efflux pump
B5FHS2	Spermidine export protein MdtJ	efflux pump
B5FHU0	Undecaprenyl-diphosphatase	target alteration
B5FIH8	Multidrug resistance protein MdtK	efflux pump
B5FKZ8	Multidrug resistance protein MdtH	efflux pump
B5FL11	Multidrug resistance protein MdtG	efflux pump
B5FMU6	Multidrug resistance protein MdtB	efflux pump
B5FMU7	Multidrug resistance protein MdtC	efflux pump
B5FMU8	Putative multidrug resistance protein MdtD	efflux pump
B5FN15	Multidrug resistance protein MdtL	efflux pump
B5FNT8	Undecaprenyl-phosphate 4-deoxy-4-formamido-L-arabinose transferase	target alteration
B5FNT9	Bifunctional polymyxin resistance protein ArnA	target alteration
B5FNU1	Undecaprenyl phosphate-alpha-4-amino-4-deoxy-L-arabinose arabinosyl transferase	target alteration
B5QU11	Purine ribonucleoside efflux pump NepI	efflux pump
B5QUE3	Spermidine export protein MdtI	efflux pump
B5QUE4	Spermidine export protein MdtJ	efflux pump
B5QUQ6	Multidrug resistance protein MdtL	efflux pump
B5QV34	Multidrug resistance protein MdtK	efflux pump
B5QXZ9	Multidrug resistance protein MdtH	efflux pump
B5QY11	Multidrug resistance protein MdtG	efflux pump
B5R0C0	Multidrug resistance protein MdtB	efflux pump
B5R0C1	Multidrug resistance protein MdtC	efflux pump
B5R0C2	Putative multidrug resistance protein MdtD	efflux pump
B5R271	Undecaprenyl-phosphate 4-deoxy-4-formamido-L-arabinose transferase	target alteration
B5R272	Bifunctional polymyxin resistance protein ArnA	target alteration
B5R274	Undecaprenyl phosphate-alpha-4-amino-4-deoxy-L-arabinose arabinosyl transferase	target alteration
B5RAN4	Multidrug resistance protein MdtK	efflux pump
B5RBD4	Multidrug resistance protein MdtH	efflux pump
B5RBW8	Multidrug resistance protein MdtB	efflux pump
B5RBW9	Multidrug resistance protein MdtC	efflux pump
B5RCC3	Undecaprenyl-phosphate 4-deoxy-4-formamido-L-arabinose transferase	target alteration
B5RCC4	Bifunctional polymyxin resistance protein ArnA	target alteration
B5RCC6	Undecaprenyl phosphate-alpha-4-amino-4-deoxy-L-arabinose arabinosyl transferase	target alteration
B5RG43	Purine ribonucleoside efflux pump NepI	efflux pump
B5RL84	Undecaprenyl-diphosphatase	target alteration
B5RR78	Undecaprenyl-diphosphatase	target alteration
B5XJR7	Undecaprenyl-diphosphatase	target alteration
B5XPB7	Putative multidrug resistance protein MdtD	efflux pump
B5XPB8	Multidrug resistance protein MdtC	efflux pump
B5XPB9	Multidrug resistance protein MdtB	efflux pump
B5XR94	Spermidine export protein MdtI	efflux pump
B5XTK8	Undecaprenyl-phosphate 4-deoxy-4-formamido-L-arabinose transferase	target alteration
B5XTK9	Bifunctional polymyxin resistance protein ArnA	target alteration
B5XTL1	Undecaprenyl phosphate-alpha-4-amino-4-deoxy-L-arabinose arabinosyl transferase	target alteration
B5XU34	Undecaprenyl-diphosphatase	target alteration
B5XWL3	Multidrug resistance protein MdtK	efflux pump
B5XXJ2	Multidrug resistance protein MdtH	efflux pump
B5XXK2	Multidrug resistance protein MdtG	efflux pump
B5XZP2	Multidrug resistance protein MdtL	efflux pump
B5YID8	Undecaprenyl-diphosphatase	target alteration
B5YR97	Undecaprenyl-diphosphatase	target alteration
B5YUD2	Multidrug resistance protein MdtA	efflux pump
B5YUD3	Multidrug resistance protein MdtB	efflux pump
B5YUD4	Multidrug resistance protein MdtC	efflux pump
B5YUD5	Putative multidrug resistance protein MdtD	efflux pump
B5YVT5	Multidrug resistance protein MdtH	efflux pump
B5YX45	Undecaprenyl-phosphate 4-deoxy-4-formamido-L-arabinose transferase	target alteration
B5YXB4	Multidrug resistance protein MdtL	efflux pump
B5YXP8	Bifunctional polymyxin resistance protein ArnA	target alteration
B5YXQ0	Undecaprenyl phosphate-alpha-4-amino-4-deoxy-L-arabinose arabinosyl transferase	target alteration
B5Z435	Spermidine export protein MdtI	efflux pump
B5Z436	Spermidine export protein MdtJ	efflux pump
B5Z497	Multidrug resistance protein MdtK	efflux pump
B5ZYG2	Undecaprenyl-diphosphatase	target alteration
B6EM11	Undecaprenyl-diphosphatase	target alteration
B6HYS0	Multidrug resistance protein MdtB	efflux pump
B6HYS1	Multidrug resistance protein MdtC	efflux pump
B6HYS2	Putative multidrug resistance protein MdtD	efflux pump
B6I3U3	Multidrug resistance protein MdtL	efflux pump
B6I428	Undecaprenyl-diphosphatase	target alteration
B6I7J7	Undecaprenyl-phosphate 4-deoxy-4-formamido-L-arabinose transferase	target alteration
B6I7J8	Bifunctional polymyxin resistance protein ArnA	target alteration
B6I7K0	Undecaprenyl phosphate-alpha-4-amino-4-deoxy-L-arabinose arabinosyl transferase	target alteration
B6I9D0	Multidrug resistance protein MdtG	efflux pump
B6I9E2	Multidrug resistance protein MdtH	efflux pump
B6IB33	Spermidine export protein MdtI	efflux pump
B6IB34	Spermidine export protein MdtJ	efflux pump
B6IBA3	Multidrug resistance protein MdtK	efflux pump
B6JCL3	Undecaprenyl-diphosphatase	target alteration
B7GJC8	Undecaprenyl-diphosphatase	target alteration
B7GR11	Undecaprenyl-diphosphatase	target alteration
B7GXE2	Undecaprenyl-diphosphatase	target alteration
B7HJF3	Metallothiol transferase FosB	product inactivation
B7HNI5	Metallothiol transferase FosB	product inactivation
B7I7L7	Undecaprenyl-diphosphatase	target alteration
B7IFS1	Undecaprenyl-diphosphatase	target alteration
B7ITG3	Metallothiol transferase FosB	product inactivation
B7J1I6	Undecaprenyl-diphosphatase	target alteration
B7JKN1	Metallothiol transferase FosB	product inactivation
B7L5F1	Spermidine export protein MdtI	efflux pump
B7L5F2	Spermidine export protein MdtJ	efflux pump
B7L5L6	Multidrug resistance protein MdtK	efflux pump
B7L855	Multidrug resistance protein MdtL	efflux pump
B7L9U7	Multidrug resistance protein MdtA	efflux pump
B7L9U8	Multidrug resistance protein MdtB	efflux pump
B7L9U9	Multidrug resistance protein MdtC	efflux pump
B7L9V0	Putative multidrug resistance protein MdtD	efflux pump
B7LAR9	Undecaprenyl-phosphate 4-deoxy-4-formamido-L-arabinose transferase	target alteration
B7LAS0	Bifunctional polymyxin resistance protein ArnA	target alteration
B7LAS2	Undecaprenyl phosphate-alpha-4-amino-4-deoxy-L-arabinose arabinosyl transferase	target alteration
B7LFG4	Multidrug resistance protein MdtG	efflux pump
B7LFZ9	Multidrug resistance protein MdtH	efflux pump
B7LGZ1	Undecaprenyl-diphosphatase	target alteration
B7LK52	Multidrug resistance protein MdtL	efflux pump
B7LM74	Undecaprenyl phosphate-alpha-4-amino-4-deoxy-L-arabinose arabinosyl transferase	target alteration
B7LM76	Bifunctional polymyxin resistance protein ArnA	target alteration
B7LM77	Undecaprenyl-phosphate 4-deoxy-4-formamido-L-arabinose transferase	target alteration
B7LQA4	Multidrug resistance protein MdtK	efflux pump
B7LQD5	Undecaprenyl-diphosphatase	target alteration
B7LT82	Multidrug resistance protein MdtG	efflux pump
B7LV38	Multidrug resistance protein MdtA	efflux pump
B7LV39	Multidrug resistance protein MdtB	efflux pump
B7LV40	Multidrug resistance protein MdtC	efflux pump
B7LV41	Putative multidrug resistance protein MdtD	efflux pump
B7LZK7	Undecaprenyl-diphosphatase	target alteration
B7LZZ1	Spermidine export protein MdtI	efflux pump
B7LZZ2	Spermidine export protein MdtJ	efflux pump
B7M0M0	Multidrug resistance protein MdtK	efflux pump
B7M457	Multidrug resistance protein MdtA	efflux pump
B7M458	Multidrug resistance protein MdtB	efflux pump
B7M459	Multidrug resistance protein MdtC	efflux pump
B7M460	Putative multidrug resistance protein MdtD	efflux pump
B7M562	Multidrug resistance protein MdtL	efflux pump
B7M5T6	Undecaprenyl-phosphate 4-deoxy-4-formamido-L-arabinose transferase	target alteration
B7M5T7	Bifunctional polymyxin resistance protein ArnA	target alteration
B7M5T9	Undecaprenyl phosphate-alpha-4-amino-4-deoxy-L-arabinose arabinosyl transferase	target alteration
B7M928	Multidrug resistance protein MdtG	efflux pump
B7M940	Multidrug resistance protein MdtH	efflux pump
B7M9V2	Spermidine export protein MdtI	efflux pump
B7M9V3	Spermidine export protein MdtJ	efflux pump
B7MA17	Multidrug resistance protein MdtK	efflux pump
B7MAD4	Undecaprenyl-diphosphatase	target alteration
B7ME86	Multidrug resistance protein MdtA	efflux pump
B7ME87	Multidrug resistance protein MdtB	efflux pump
B7ME88	Multidrug resistance protein MdtC	efflux pump
B7ME89	Putative multidrug resistance protein MdtD	efflux pump
B7MG21	Undecaprenyl-phosphate 4-deoxy-4-formamido-L-arabinose transferase	target alteration
B7MG22	Bifunctional polymyxin resistance protein ArnA	target alteration
B7MG24	Undecaprenyl phosphate-alpha-4-amino-4-deoxy-L-arabinose arabinosyl transferase	target alteration
B7MGD1	Multidrug resistance protein MdtL	efflux pump
B7MIJ4	Multidrug resistance protein MdtG	efflux pump
B7MIK6	Multidrug resistance protein MdtH	efflux pump
B7MTI5	Multidrug resistance protein MdtG	efflux pump
B7MTJ6	Multidrug resistance protein MdtH	efflux pump
B7MV43	Multidrug resistance protein MdtK	efflux pump
B7MV45	Spermidine export protein MdtI	efflux pump
B7MV46	Spermidine export protein MdtJ	efflux pump
B7MWY7	Multidrug resistance protein MdtA	efflux pump
B7MWY8	Multidrug resistance protein MdtB	efflux pump
B7MWY9	Multidrug resistance protein MdtC	efflux pump
B7MWZ0	Putative multidrug resistance protein MdtD	efflux pump
B7MXT5	Undecaprenyl-phosphate 4-deoxy-4-formamido-L-arabinose transferase	target alteration
B7MXT6	Bifunctional polymyxin resistance protein ArnA	target alteration
B7MXT9	Undecaprenyl phosphate-alpha-4-amino-4-deoxy-L-arabinose arabinosyl transferase	target alteration
B7N061	Undecaprenyl-diphosphatase	target alteration
B7N2F5	Multidrug resistance protein MdtL	efflux pump
B7N5L9	Undecaprenyl-phosphate 4-deoxy-4-formamido-L-arabinose transferase	target alteration
B7N5M0	Bifunctional polymyxin resistance protein ArnA	target alteration
B7N5M2	Undecaprenyl phosphate-alpha-4-amino-4-deoxy-L-arabinose arabinosyl transferase	target alteration
B7NAS9	Multidrug resistance protein MdtG	efflux pump
B7NAU0	Multidrug resistance protein MdtH	efflux pump
B7NB49	Spermidine export protein MdtI	efflux pump
B7NBB6	Multidrug resistance protein MdtK	efflux pump
B7NCB0	Multidrug resistance protein MdtA	efflux pump
B7NCB1	Multidrug resistance protein MdtB	efflux pump
B7NCB2	Multidrug resistance protein MdtC	efflux pump
B7NCB3	Putative multidrug resistance protein MdtD	efflux pump
B7ND46	Undecaprenyl-diphosphatase	target alteration
B7NF27	Multidrug resistance protein MdtL	efflux pump
B7NJS0	Undecaprenyl-diphosphatase	target alteration
B7NL69	Multidrug resistance protein MdtH	efflux pump
B7NL82	Multidrug resistance protein MdtG	efflux pump
B7NNT3	Undecaprenyl-phosphate 4-deoxy-4-formamido-L-arabinose transferase	target alteration
B7NNT4	Bifunctional polymyxin resistance protein ArnA	target alteration
B7NNT6	Undecaprenyl phosphate-alpha-4-amino-4-deoxy-L-arabinose arabinosyl transferase	target alteration
B7NQA9	Putative multidrug resistance protein MdtD	efflux pump
B7NQB0	Multidrug resistance protein MdtC	efflux pump
B7NQB1	Multidrug resistance protein MdtB	efflux pump
B7NQB2	Multidrug resistance protein MdtA	efflux pump
B7NR12	Multidrug resistance protein MdtL	efflux pump
B7NTX0	Multidrug resistance protein MdtK	efflux pump
B7NUP0	Spermidine export protein MdtI	efflux pump
B7UFR6	Undecaprenyl-phosphate 4-deoxy-4-formamido-L-arabinose transferase	target alteration
B7UFR7	Bifunctional polymyxin resistance protein ArnA	target alteration
B7UFR9	Undecaprenyl phosphate-alpha-4-amino-4-deoxy-L-arabinose arabinosyl transferase	target alteration
B7UIW5	Undecaprenyl-diphosphatase	target alteration
B7UMD5	Purine ribonucleoside efflux pump NepI	efflux pump
B7UMH7	Multidrug resistance protein MdtL	efflux pump
B7UP67	Multidrug resistance protein MdtG	efflux pump
B7UP79	Multidrug resistance protein MdtH	efflux pump
B7URT9	Spermidine export protein MdtI	efflux pump
B7URU0	Spermidine export protein MdtJ	efflux pump
B7US04	Multidrug resistance protein MdtK	efflux pump
B7UTB2	Multidrug resistance protein MdtA	efflux pump
B7UTB3	Multidrug resistance protein MdtB	efflux pump
B7UTB4	Multidrug resistance protein MdtC	efflux pump
B7UTB5	Putative multidrug resistance protein MdtD	efflux pump
B7VAE6	Undecaprenyl-diphosphatase	target alteration
B7VBN0	Undecaprenyl phosphate-alpha-4-amino-4-deoxy-L-arabinose arabinosyl transferase	target alteration
B7VBN2	Bifunctional polymyxin resistance protein ArnA	target alteration
B7VBN3	Undecaprenyl-phosphate 4-deoxy-4-formamido-L-arabinose transferase	target alteration
B7VIW0	Undecaprenyl-diphosphatase	target alteration
B8CJF5	Undecaprenyl-diphosphatase	target alteration
B8CWG2	Undecaprenyl-diphosphatase	target alteration
B8D6X4	Undecaprenyl-diphosphatase	target alteration
B8D8M0	Undecaprenyl-diphosphatase	target alteration
B8DUF9	Undecaprenyl-diphosphatase	target alteration
B8EBV1	Undecaprenyl-diphosphatase	target alteration
B8FAZ7	Undecaprenyl-diphosphatase	target alteration
B8FX50	Undecaprenyl-diphosphatase	target alteration
B8GUR7	Undecaprenyl-diphosphatase	target alteration
B8H6C3	Undecaprenyl-diphosphatase	target alteration
B8H8K7	Undecaprenyl-diphosphatase	target alteration
B8I004	Undecaprenyl-diphosphatase	target alteration
B8J0P3	Undecaprenyl-diphosphatase	target alteration
B8J8T6	Undecaprenyl-diphosphatase	target alteration
B8ZLV4	Undecaprenyl-diphosphatase	target alteration
B8ZRD4	Undecaprenyl-diphosphatase	target alteration
B9DK59	Undecaprenyl-diphosphatase	target alteration
B9DPM7	Probable dual-specificity RNA methyltransferase RlmN	target alteration
B9EA92	Undecaprenyl-diphosphatase	target alteration
B9IY29	Metallothiol transferase FosB	product inactivation
B9KYE6	Undecaprenyl-diphosphatase	target alteration
B9L7I2	Undecaprenyl-diphosphatase	target alteration
B9M0D1	Undecaprenyl-diphosphatase	target alteration
B9MFI6	Undecaprenyl-diphosphatase	target alteration
B9MKR9	Undecaprenyl-diphosphatase	target alteration
C0H3X7	Phosphatidylglycerol lysyltransferase	target alteration
C0M8J5	Undecaprenyl-diphosphatase	target alteration
C0MG10	Undecaprenyl-diphosphatase	target alteration
C0PYX8	Undecaprenyl-diphosphatase	target alteration
C0Q067	Undecaprenyl phosphate-alpha-4-amino-4-deoxy-L-arabinose arabinosyl transferase	target alteration
C0Q069	Bifunctional polymyxin resistance protein ArnA	target alteration
C0Q070	Undecaprenyl-phosphate 4-deoxy-4-formamido-L-arabinose transferase	target alteration
C0Q1F2	Multidrug resistance protein MdtC	efflux pump
C0Q1F3	Multidrug resistance protein MdtB	efflux pump
C0Q1F4	Multidrug resistance protein MdtA	efflux pump
C0Q212	Purine ribonucleoside efflux pump NepI	efflux pump
C0Q2L5	Multidrug resistance protein MdtL	efflux pump
C0Q4Y4	Spermidine export protein MdtI	efflux pump
C0Q4Y5	Spermidine export protein MdtJ	efflux pump
C0Q5V7	Multidrug resistance protein MdtK	efflux pump
C0Q842	Multidrug resistance protein MdtH	efflux pump
C0Q855	Multidrug resistance protein MdtG	efflux pump
C0QC99	Undecaprenyl-diphosphatase	target alteration
C0QU08	Undecaprenyl-diphosphatase	target alteration
C0RMI1	Undecaprenyl-diphosphatase	target alteration
C0ZJ12	Metallothiol transferase FosB	product inactivation
C0ZL89	Lysylphosphatidylglycerol biosynthesis bifunctional protein LysX	target alteration
C1A8L5	Undecaprenyl-diphosphatase	target alteration
C1AQ52	Undecaprenyl-diphosphatase	target alteration
C1B7Z5	Lysylphosphatidylglycerol biosynthesis bifunctional protein LysX	target alteration
C1C5J2	Undecaprenyl-diphosphatase	target alteration
C1CCM1	Undecaprenyl-diphosphatase	target alteration
C1CIV9	Undecaprenyl-diphosphatase	target alteration
C1CPW6	Undecaprenyl-diphosphatase	target alteration
C1CVN6	Undecaprenyl-diphosphatase	target alteration
C1D4X7	Undecaprenyl-diphosphatase	target alteration
C1DLV7	Undecaprenyl-diphosphatase	target alteration
C1ERH6	Metallothiol transferase FosB	product inactivation
C3KAD2	Bifunctional polymyxin resistance protein ArnA	target alteration
C3KAD3	Undecaprenyl-phosphate 4-deoxy-4-formamido-L-arabinose transferase	target alteration
C3L5E9	Metallothiol transferase FosB 1	product inactivation
C3L6A4	Metallothiol transferase FosB 2	product inactivation
C3LS16	Undecaprenyl-diphosphatase	target alteration
C3MCT9	Undecaprenyl-diphosphatase	target alteration
C3P6D6	Metallothiol transferase FosB 2	product inactivation
C3P803	Metallothiol transferase FosB 1	product inactivation
C4XT96	Undecaprenyl-diphosphatase	target alteration
C4ZQX4	Undecaprenyl-diphosphatase	target alteration
C4ZRZ3	Multidrug resistance protein MdtG	efflux pump
C4ZS05	Multidrug resistance protein MdtH	efflux pump
C4ZSG2	Multidrug resistance protein MdtA	efflux pump
C4ZSG3	Multidrug resistance protein MdtB	efflux pump
C4ZSG4	Multidrug resistance protein MdtC	efflux pump
C4ZSG5	Putative multidrug resistance protein MdtD	efflux pump
C4ZU96	Undecaprenyl-phosphate 4-deoxy-4-formamido-L-arabinose transferase	target alteration
C4ZU97	Bifunctional polymyxin resistance protein ArnA	target alteration
C4ZXQ4	Purine ribonucleoside efflux pump NepI	efflux pump
C4ZY62	Spermidine export protein MdtI	efflux pump
C4ZY63	Spermidine export protein MdtJ	efflux pump
C4ZYC7	Multidrug resistance protein MdtK	efflux pump
C4ZYY8	Multidrug resistance protein MdtL	efflux pump
C5B828	Multidrug resistance protein MdtH	efflux pump
C5BC70	Multidrug transporter MdfA	efflux pump
C5BDQ5	Undecaprenyl-phosphate 4-deoxy-4-formamido-L-arabinose transferase	target alteration
C5BDQ8	Undecaprenyl phosphate-alpha-4-amino-4-deoxy-L-arabinose arabinosyl transferase	target alteration
C5BDY7	Multidrug resistance protein MdtK	efflux pump
C5BHN3	Multidrug resistance protein MdtC	efflux pump
C5BHN6	Multidrug resistance protein MdtA	efflux pump
C5BRP6	Undecaprenyl-diphosphatase	target alteration
C5CBT8	Undecaprenyl-diphosphatase	target alteration
C5CGT6	Undecaprenyl-diphosphatase	target alteration
C5CTM8	Undecaprenyl-diphosphatase	target alteration
C5D3Y4	Undecaprenyl-diphosphatase	target alteration
C6BUE1	Undecaprenyl-diphosphatase	target alteration
C6CAI2	Multidrug resistance protein MdtB	efflux pump
C6DAW3	Undecaprenyl phosphate-alpha-4-amino-4-deoxy-L-arabinose arabinosyl transferase	target alteration
C6DAW5	Bifunctional polymyxin resistance protein ArnA	target alteration
C6DAW6	Undecaprenyl-phosphate 4-deoxy-4-formamido-L-arabinose transferase	target alteration
C6DBC6	Multidrug resistance protein MdtA	efflux pump
C6DBC8	Multidrug resistance protein MdtC	efflux pump
C6DBD0	Putative multidrug resistance protein MdtD	efflux pump
C6DDL8	Undecaprenyl-diphosphatase	target alteration
C6DFD4	Multidrug resistance protein MdtH	efflux pump
C7C422	Metallo-beta-lactamase type 2	product inactivation
C9XVZ5	Multidrug resistance protein MdtA	efflux pump
D0CCT2	Chloramphenicol resistance protein CraA	efflux pump
D0JKF6	Multidrug transporter MdfA	efflux pump
D0JNB0	Multidrug resistance protein MdtB	efflux pump
D0JUX5	Multidrug transporter MdfA	efflux pump
D0ZEW1	Multidrug resistance protein MdtB	efflux pump
D0ZHC6	Multidrug transporter MdfA	efflux pump
D0ZV89	Virulence sensor histidine kinase PhoQ	target alteration, efflux pump
D0ZV90	Virulence transcriptional regulatory protein PhoP	target alteration, efflux pump
D0ZXQ1	Outer membrane porin protein OmpD	efflux pump
D0ZXQ3	Methyl viologen resistance protein SmvA	efflux pump
D2BTK6	Multidrug resistance protein MdtA	efflux pump
D2BX50	Multidrug resistance protein MdtG	efflux pump
D3HKY4	Flavin-dependent monooxygenase	efflux pump
D3V7P2	Multidrug resistance protein MdtA	efflux pump
D3V7P3	Multidrug resistance protein MdtB	efflux pump
D3V7P4	Multidrug resistance protein MdtC	efflux pump
D4I6V2	Multidrug resistance protein MdtA	efflux pump
D4I6V4	Multidrug resistance protein MdtC	efflux pump
D5B5U5	Multidrug transporter MdfA	efflux pump
D8MQN9	Multidrug resistance protein MdtG	efflux pump
E0T2N0	Multidrug transporter MdfA	efflux pump
E1ANH6	Beta-lactamase CTX-M-97	product inactivation
E1WFA0	Virulence sensor histidine kinase PhoQ	target alteration, efflux pump
E1WFA1	Virulence transcriptional regulatory protein PhoP	target alteration, efflux pump
E3GC98	Multidrug resistance protein MdtG	efflux pump
E8XY75	Multidrug resistance protein MdtG	efflux pump
F2EYD8	Multidrug resistance protein MdtA	efflux pump
F2EYE0	Multidrug resistance protein MdtC	efflux pump
F2R776	Rifampicin monooxygenase	product inactivation
F5ZP94	Virulence sensor histidine kinase PhoQ	target alteration, efflux pump
F5ZP95	Virulence transcriptional regulatory protein PhoP	target alteration, efflux pump
I6YBX3	Pentapeptide repeat protein MfpA	target protection
J9RX10	Outer membrane protein YedS	efflux pump
O05197	Tetracycline resistance protein TetQ	target protection
O05224	Putative arsenical pump membrane protein	efflux pump
O05465	Beta-lactamase	product inactivation
O05701	Dihydropteroate synthase	target alteration
O06967	Multidrug resistance ABC transporter ATP-binding/permease protein BmrA	efflux pump
O07293	Beta-lactamase OXA-18	product inactivation
O07549	Probable multidrug resistance ABC transporter ATP-binding/permease protein YheH	efflux pump
O07550	Probable multidrug resistance ABC transporter ATP-binding/permease protein YheI	efflux pump
O08337	Beta-lactamase SHV-8	product inactivation
O08498	Metallo-beta-lactamase type 2	product inactivation
O31099	Solvent efflux pump periplasmic linker SrpA	efflux pump
O31100	Solvent-resistant pump membrane transporter SrpB	efflux pump
O31101	Solvent efflux pump outer membrane protein SrpC	efflux pump
O31501	Swarming motility protein SwrC	efflux pump
O31817	Metallothiol transferase FosB	product inactivation
O31855	Probable multidrug resistance protein NorM	efflux pump
O32003	SPbeta prophage-derived aminoglycoside N(3')-acetyltransferase-like protein YokD	product inactivation
O32859	Multidrug efflux pump Tap	efflux pump
O33807	Beta-lactamase CTX-M-4	product inactivation
O34474	Probable multidrug resistance protein YoeA	efflux pump
O34697	Bacitracin export ATP-binding protein BceA	efflux pump
O35018	Lincomycin resistance protein LmrB	efflux pump
O51273	Undecaprenyl-diphosphatase	target alteration
O52248	Toluene efflux pump membrane transporter TtgB	efflux pump
O52271	DNA-directed RNA polymerase subunit beta	target replacement
O52324	Undecaprenyl-phosphate 4-deoxy-4-formamido-L-arabinose transferase	target alteration
O52325	Bifunctional polymyxin resistance protein ArnA	target alteration
O52327	Undecaprenyl phosphate-alpha-4-amino-4-deoxy-L-arabinose arabinosyl transferase	target alteration
O52836	Tetracycline resistance protein TetW	target protection
O53645	Multidrug efflux ATP-binding/permease protein Rv0194	efflux pump
O54281	Methicillin resistance regulatory protein MecI	target replacement
O65975	Beta-lactamase CTX-M-5	product inactivation
O65976	Beta-lactamase CTX-M-6	product inactivation
O67939	Undecaprenyl-diphosphatase	target alteration
O69279	Guanidinium exporter	efflux pump
O69395	Beta-lactamase Toho-2	product inactivation
O69773	Beta-lactamase	product inactivation
O82855	Multidrug resistance protein NorM	efflux pump
O84955	Beta-lactamase OXA-20	product inactivation
O86094	DNA-directed RNA polymerase subunit beta	target replacement
O86311	Multidrug efflux system ATP-binding protein Rv1218c	efflux pump
O87866	Quaternary ammonium compound-resistance protein QacG	efflux pump
O87868	Quaternary ammonium compound-resistance protein QacH	efflux pump
P00381	Dihydrofolate reductase	product inactivation
P00382	Dihydrofolate reductase type 1	product inactivation
P00383	Dihydrofolate reductase type 2	product inactivation
P00384	Dihydrofolate reductase type 2	product inactivation
P00484	Chloramphenicol acetyltransferase 3	product inactivation
P00485	Chloramphenicol acetyltransferase	product inactivation
P00486	Chloramphenicol acetyltransferase	product inactivation
P00487	Chloramphenicol acetyltransferase	product inactivation
P00551	Aminoglycoside 3'-phosphotransferase	product inactivation
P00552	Aminoglycoside 3'-phosphotransferase	product inactivation
P00553	Aminoglycoside 3'-phosphotransferase	product inactivation
P00555	Aminoglycoside 3'-phosphotransferase	product inactivation
P00557	Hygromycin-B 4-O-kinase	product inactivation
P00807	Beta-lactamase	product inactivation
P00808	Beta-lactamase	product inactivation
P00809	Beta-lactamase 1	product inactivation
P00811	Beta-lactamase	product inactivation
P00956	Isoleucine--tRNA ligase	target alteration
P02930	Outer membrane protein TolC	efflux pump
P02931	Outer membrane porin F	efflux pump
P02979	rRNA adenine N-6-methyltransferase	target alteration
P02980	Tetracycline resistance protein, class B	efflux pump
P02981	Tetracycline resistance protein, class C	efflux pump
P02982	Tetracycline resistance protein, class A	efflux pump
P02983	Tetracycline resistance protein	efflux pump
P04129	Mercuric transport protein periplasmic component	efflux pump
P04131	Mercuric transport protein periplasmic component	efflux pump
P04174	Dihydrofolate reductase	product inactivation
P04190	Metallo-beta-lactamase type 2	product inactivation
P05057	Kanamycin nucleotidyltransferase	product inactivation
P05058	Kanamycin nucleotidyltransferase	product inactivation
P05192	Beta-lactamase	product inactivation
P05193	Beta-lactamase	product inactivation
P05364	Beta-lactamase	product inactivation
P05382	Dihydropteroate synthase	target alteration
P05789	Erythromycin esterase type II	product inactivation
P05794	Dihydrofolate reductase type 2	product inactivation
P06107	Lincosamide resistance protein	product inactivation
P06135	Chloramphenicol acetyltransferase	product inactivation
P06548	Beta-lactamase 3	product inactivation
P06571	rRNA adenine N-6-methyltransferase	target alteration
P06572	rRNA adenine N-6-methyltransferase	target alteration
P06573	rRNA adenine N-6-methyltransferase	target alteration
P06690	Broad mercury transporter MerE	efflux pump
P06992	Ribosomal RNA small subunit methyltransferase A	target alteration
P06996	Outer membrane porin C	efflux pump
P07287	rRNA adenine N-6-methyltransferase	target alteration
P07561	Tetracycline resistance protein	efflux pump
P07641	Chloramphenicol acetyltransferase	product inactivation
P07684	Erythromycin esterase type I	product inactivation
P07944	Beta-lactam-inducible penicillin-binding protein	product inactivation
P08077	Streptomycin 6-kinase	product inactivation
P08149	Probable peptidoglycan D,D-transpeptidase PenA	target replacement
P08457	Streptothricin acetyltransferase	product inactivation
P08691	Arsenical pump membrane protein	efflux pump
P08881	Aminoglycoside (3'') (9) adenylyltransferase	product inactivation
P08988	Aminoglycoside N(3)-acetyltransferase IV	product inactivation
P09757	Tetracycline resistance protein TetM	target protection
P09885	Aminoglycoside 3'-phosphotransferase	product inactivation
P09891	rRNA adenine N-6-methyltransferase	target alteration
P09979	Hygromycin-B 7''-O-kinase	product inactivation
P0A0A9	Methicillin resistance mecR1 protein	target replacement
P0A0B0	Methicillin resistance mecR1 protein	target replacement
P0A0B1	Methicillin resistance mecR1 protein	target replacement
P0A0B2	Methicillin resistance mecR1 protein	target replacement
P0A0C0	Bifunctional AAC/APH	product inactivation
P0A0C1	Bifunctional AAC/APH	product inactivation
P0A0C2	Bifunctional AAC/APH	product inactivation
P0A0D0	Spectinomycin 9-adenylyltransferase	product inactivation
P0A0D1	Spectinomycin 9-adenylyltransferase	product inactivation
P0A0D2	Spectinomycin 9-adenylyltransferase	product inactivation
P0A0H1	rRNA adenine N-6-methyltransferase	target alteration
P0A0H2	rRNA adenine N-6-methyltransferase	target alteration
P0A0H3	rRNA adenine N-6-methyltransferase	target alteration
P0A0J4	Quinolone resistance protein NorA	efflux pump
P0A0J5	Quinolone resistance protein NorA	efflux pump
P0A0J6	Quinolone resistance protein NorA	efflux pump
P0A0J7	Quinolone resistance protein NorA	efflux pump
P0A0U8	Probable peptidoglycan D,D-transpeptidase PenA	target replacement
P0A0U9	Probable peptidoglycan D,D-transpeptidase PenA	target replacement
P0A1V8	Beta-lactamase OXA-2	product inactivation
P0A1V9	Beta-lactamase OXA-2	product inactivation
P0A216	Mercuric transport protein periplasmic component	efflux pump
P0A217	Mercuric transport protein periplasmic component	efflux pump
P0A218	Mercuric transport protein periplasmic component	efflux pump
P0A255	Aminoglycoside N(3)-acetyltransferase III	product inactivation
P0A256	Aminoglycoside N(3)-acetyltransferase III	product inactivation
P0A2S4	Multiple antibiotic resistance protein MarA	efflux pump
P0A2S5	Multiple antibiotic resistance protein MarA	efflux pump
P0A2S6	Multiple antibiotic resistance protein MarA	efflux pump
P0A3M1	Beta-lactamase SHV-5	product inactivation
P0A3M2	Beta-lactamase SHV-5	product inactivation
P0A3M3	Beta-lactamase OXA-9	product inactivation
P0A3M4	Beta-lactamase OXA-9	product inactivation
P0A3Y5	Aminoglycoside 3'-phosphotransferase	product inactivation
P0A3Y6	Aminoglycoside 3'-phosphotransferase	product inactivation
P0A4D5	rRNA adenine N-6-methyltransferase	target alteration
P0A4D6	rRNA adenine N-6-methyltransferase	target alteration
P0A4K4	Multi-drug resistance efflux pump PmrA	efflux pump
P0A4K5	Multi-drug resistance efflux pump PmrA	efflux pump
P0A4K6	Tetracycline resistance protein	efflux pump
P0A4K7	Tetracycline resistance protein	efflux pump
P0A4K8	Tetracycline resistance protein	efflux pump
P0A5I7	Beta-lactamase	product inactivation
P0A5N1	Aminoglycoside 2'-N-acetyltransferase	product inactivation
P0A6N2	Elongation factor Tu	target alteration
P0A6N3	Elongation factor Tu	target alteration
P0A8V2	DNA-directed RNA polymerase subunit beta	target replacement
P0A910	Outer membrane protein A	efflux pump
P0A9Z7	Beta-lactamase SHV-2	product inactivation
P0A9Z8	Beta-lactamase SHV-2	product inactivation
P0A9Z9	Beta-lactamase SHV-2	product inactivation
P0AA00	Beta-lactamase SHV-2	product inactivation
P0AAG5	Multidrug resistance-like ATP-binding protein MdlB	efflux pump
P0AAG6	Multidrug resistance-like ATP-binding protein MdlB	efflux pump
P0AAG7	Multidrug resistance-like ATP-binding protein MdlB	efflux pump
P0AAH4	Putrescine export system ATP-binding protein SapD	efflux pump
P0AAH5	Peptide transport system ATP-binding protein SapD	efflux pump
P0AAH6	Peptide transport system ATP-binding protein SapD	efflux pump
P0AAH7	Peptide transport system ATP-binding protein SapD	efflux pump
P0AAH8	Putrescine export system ATP-binding protein SapF	efflux pump
P0AAH9	Peptide transport system ATP-binding protein SapF	efflux pump
P0AAI0	Peptide transport system ATP-binding protein SapF	efflux pump
P0AB93	Arsenical pump membrane protein	efflux pump
P0AB94	Arsenical pump membrane protein	efflux pump
P0AB95	Arsenical pump membrane protein	efflux pump
P0ABQ4	Dihydrofolate reductase	product inactivation
P0ABQ7	Dihydrofolate reductase type 8	product inactivation
P0ABQ8	Dihydrofolate reductase type 8	product inactivation
P0AC11	Dihydropteroate synthase type-2	target alteration
P0ACH5	Multiple antibiotic resistance protein MarA	efflux pump
P0ACH6	Multiple antibiotic resistance protein MarA	efflux pump
P0ACH7	Multiple antibiotic resistance protein MarA	efflux pump
P0AD63	Beta-lactamase SHV-1	product inactivation
P0AD64	Beta-lactamase SHV-1	product inactivation
P0ADL1	Purine ribonucleoside efflux pump NepI	efflux pump
P0ADL2	Purine ribonucleoside efflux pump NepI	efflux pump
P0AE04	2''-aminoglycoside nucleotidyltransferase	product inactivation
P0AE05	2''-aminoglycoside nucleotidyltransferase	product inactivation
P0AE06	Multidrug efflux pump subunit AcrA	efflux pump
P0AE07	Multidrug efflux pump subunit AcrA	efflux pump
P0AE82	Sensor histidine kinase CpxA	efflux pump
P0AEJ0	Multidrug export protein EmrB	efflux pump
P0AEJ1	Multidrug export protein EmrB	efflux pump
P0AEY8	Multidrug transporter MdfA	efflux pump
P0AEY9	Multidrug transporter MdfA	efflux pump
P0AEZ0	Multidrug transporter MdfA	efflux pump
P0AG05	Aminoglycoside (3'') (9) adenylyltransferase	product inactivation
P0AG06	Aminoglycoside (3'') (9) adenylyltransferase	product inactivation
P0AGC9	Quaternary ammonium compound-resistance protein QacE	efflux pump
P0AGD0	Quaternary ammonium compound-resistance protein QacE	efflux pump
P0C000	Response regulator ArlR	efflux pump
P0C001	Response regulator ArlR	efflux pump
P0C002	Dihydropteroate synthase type-1	target alteration
P0C003	Dihydropteroate synthase type-1	target alteration
P0C004	Dihydropteroate synthase type-1	target alteration
P0C069	Multidrug/solvent efflux pump periplasmic linker protein MepA	efflux pump
P0C070	Multidrug/solvent efflux pump membrane transporter MepB	efflux pump
P0C071	Multidrug/solvent efflux pump outer membrane protein MepC	efflux pump
P0C0R6	Bifunctional polymyxin resistance protein ArnA	target alteration
P0C1S0	HTH-type transcriptional regulator MgrA	efflux pump
P0C2H2	Macrolide export ATP-binding/permease protein MacB	efflux pump
P0C2H3	Macrolide export ATP-binding/permease protein MacB 2	efflux pump
P0C566	Purine ribonucleoside efflux pump NepI	efflux pump
P0C7H7	Spermidine export protein MdtI	efflux pump
P0CE47	Elongation factor Tu 1	target alteration
P0CE48	Elongation factor Tu 2	target alteration
P0CW80	Multidrug resistance protein EbrA	efflux pump
P0CW81	Multidrug resistance protein EbrA	efflux pump
P0CW82	Multidrug resistance protein EbrB	efflux pump
P0CW83	Multidrug resistance protein EbrB	efflux pump
P0DH30	Undecaprenyl-diphosphatase	target alteration
P0DH31	Undecaprenyl-diphosphatase	target alteration
P0DM78	Virulence transcriptional regulatory protein PhoP	target alteration, efflux pump
P0DM80	Virulence sensor histidine kinase PhoQ	target alteration, efflux pump
P0DPR4	Quinolone resistance transporter	efflux pump
P0DPR5	Fosfomycin resistance protein AbaF	efflux pump
P0DPR6	Colistin resistance protein EmrA	efflux pump
P0DPR7	Colistin resistance protein EmrB	efflux pump
P0DTV9	Streptomycin 6-adenylyltransferase	product inactivation
P10051	Aminoglycoside N(6')-acetyltransferase type 1	product inactivation
P10337	rRNA adenine N-6-methyltransferase	target alteration
P10424	Beta-lactamase 1	product inactivation
P10425	Metallo-beta-lactamase type 2	product inactivation
P10509	Beta-lactamase	product inactivation
P10738	rRNA adenine N-6-methyltransferase	target alteration
P10952	Tetracycline resistance protein TetO	target protection
P11131	Tetracycline resistance protein TetM from transposon Tn1545	target protection
P11504	Chloramphenicol acetyltransferase	product inactivation
P11545	Methylenomycin A resistance protein	efflux pump
P11731	Dihydrofolate reductase type 5	product inactivation
P12055	Aminoglycoside 6-adenylyltransferase	product inactivation
P12056	Chloramphenicol resistance protein	efflux pump
P12287	Regulatory protein BlaR1	product inactivation
P12833	Dihydrofolate reductase type 3	product inactivation
P12921	Tunicamycin resistance protein	efflux pump
P13018	Streptothricin acetyltransferase	product inactivation
P13079	rRNA methyltransferase	target alteration
P13081	Bleomycin resistance protein	product inactivation
P13082	Streptomycin 3''-kinase	product inactivation
P13113	Mercuric transport protein periplasmic component	efflux pump
P13246	Aminoglycoside N(3)-acetyltransferase III	product inactivation
P13250	Aminoglycoside 3'-phosphotransferase	product inactivation
P13511	Cobalt-zinc-cadmium resistance protein CzcA	efflux pump
P13661	Beta-lactamase OXA-1	product inactivation
P13924	Tetracycline resistance protein	efflux pump
P13955	Dihydrofolate reductase type 1 from Tn4003	product inactivation
P13956	rRNA adenine N-6-methyltransferase	target alteration
P13957	rRNA adenine N-6-methyltransferase	target alteration
P13978	rRNA adenine N-6-methyltransferase	target alteration
P14171	Beta-lactamase	product inactivation
P14319	Quaternary ammonium compound-resistance protein QacC	efflux pump
P14488	Metallo-beta-lactamase type 2	product inactivation
P14489	Beta-lactamase OXA-10	product inactivation
P14508	Aminoglycoside 3'-phosphotransferase	product inactivation
P14509	Aminoglycoside 3'-phosphotransferase	product inactivation
P14510	Kanamycin resistance protein (Fragment)	product inactivation
P14511	Aminoglycoside (3'') (9) adenylyltransferase	product inactivation
P14551	Tetracycline resistance determinant	efflux pump
P14559	Beta-lactamase	product inactivation
P14560	Beta-lactamase 2	product inactivation
P16426	Phosphinothricin N-acetyltransferase	product inactivation
P16897	Beta-lactamase PSE-4	product inactivation
P16898	rRNA adenine N-6-methyltransferase	target alteration
P17493	Bleomycin resistance protein	product inactivation
P17585	Aminoglycoside 6-adenylyltransferase	product inactivation
P17978	Virginiamycin B lyase	product inactivation
P18150	Streptomycin 3''-kinase	product inactivation
P18251	Beta-lactamase Ohio-1	product inactivation
P18330	Isoleucine--tRNA ligase 1	target alteration
P18357	Regulatory protein BlaR1	product inactivation
P18539	Beta-lactamase	product inactivation
P18622	Streptomycin 6-kinase	product inactivation
P18623	Viomycin phosphotransferase	product inactivation
P18644	23S rRNA (adenosine(1067)-2'-O)-methyltransferase	target alteration
P19650	Aminoglycoside N(6')-acetyltransferase type 1	product inactivation
P20074	Chloramphenicol acetyltransferase	product inactivation
P20092	Aminoglycoside N(6')-acetyltransferase type 1	product inactivation
P20169	Drug sensory protein A	target alteration
P20173	rRNA adenine N-6-methyltransferase	target alteration
P20174	Tetracycline resistance protein TetO	target protection
P20928	Guanidinium exporter	efflux pump
P21236	rRNA adenine N-6-methyltransferase	target alteration
P21598	Tetracycline resistance protein TetM from transposon Tn916	target protection
P21861	Phosphinothricin N-acetyltransferase	product inactivation
P22390	Beta-lactamase	product inactivation
P22391	Beta-lactamase OXY-1	product inactivation
P22615	Chloramphenicol acetyltransferase 2	product inactivation
P22616	Chloramphenicol acetyltransferase 2	product inactivation
P22782	Chloramphenicol acetyltransferase	product inactivation
P22905	Mercuric transport protein MerC	efflux pump
P23054	Tetracycline resistance protein	efflux pump
P23181	Gentamicin 3-N-acetyltransferase	product inactivation
P23212	Erythromycin resistance ATP-binding protein MsrA	target protection
P23364	Chloramphenicol acetyltransferase	product inactivation
P23835	Tetracycline resistance protein TetO	target protection
P23836	Transcriptional regulatory protein PhoP	target alteration, efflux pump
P23837	Sensor protein PhoQ	target alteration, efflux pump
P23895	Multidrug transporter EmrE	efflux pump
P23954	Beta-lactamase OXY-2	product inactivation
P24126	Fusaric acid resistance protein FusA	target alteration
P24177	Probable aminoglycoside efflux pump	efflux pump
P24180	Multidrug export protein AcrE	efflux pump
P24181	Multidrug export protein AcrF	efflux pump
P24618	16S rRNA (guanine(1405)-N(7))-methyltransferase	target alteration
P24619	16S rRNA (guanine(1405)-N(7))-methyltransferase	target alteration
P24735	Beta-lactamase	product inactivation
P25051	Vancomycin/teicoplanin A-type resistance protein VanA	target alteration
P25256	Tylosin resistance ATP-binding protein TlrC	efflux pump
P25309	Chloramphenicol acetyltransferase	product inactivation
P25744	Multidrug resistance protein MdtG	efflux pump
P25910	Metallo-beta-lactamase type 2	product inactivation
P25919	rRNA methyltransferase	target alteration
P25920	16S rRNA (adenine(1408)-N(1))-methyltransferase	target alteration
P26825	Chloramphenicol acetyltransferase	product inactivation
P26826	Chloramphenicol acetyltransferase	product inactivation
P26838	Chloramphenicol acetyltransferase	product inactivation
P26839	Virginiamycin A acetyltransferase	product inactivation
P26840	Probable macrolide acetyltransferase (Fragment)	product inactivation
P26841	Chloramphenicol acetyltransferase	product inactivation
P26918	Metallo-beta-lactamase type 2	product inactivation
P27173	Multi-drug resistance efflux pump PmrA homolog (Fragment)	efflux pump
P27303	Multidrug export protein EmrA	efflux pump
P27422	Dihydrofolate reductase type 7	product inactivation
P28018	Beta-lactamase 1	product inactivation
P28246	Bicyclomycin resistance protein	efflux pump
P28585	Beta-lactamase CTX-M-1	product inactivation
P29753	Vancomycin C-type resistance protein VanC	target alteration
P29806	2''-aminoglycoside nucleotidyltransferase	product inactivation
P29807	Aminoglycoside N(3)-acetyltransferase III	product inactivation
P29808	Aminoglycoside N(3)-acetyltransferase III	product inactivation
P29809	Aminoglycoside N(3)-acetyltransferase VIII	product inactivation
P29810	Aminoglycoside N(3)-acetyltransferase IX	product inactivation
P30180	Aminoglycoside N(3)-acetyltransferase VII	product inactivation
P30329	Arsenical pump membrane protein	efflux pump
P30843	Transcriptional regulatory protein BasR	target alteration, efflux pump
P30845	Phosphoethanolamine transferase EptA	target alteration
P30896	Beta-lactamase SHV-3	product inactivation
P30897	Beta-lactamase	product inactivation
P30898	Beta-lactamase	product inactivation
P30899	Beta-lactamase	product inactivation
P31141	Chloramphenicol resistance protein	efflux pump
P31224	Multidrug efflux pump subunit AcrB	efflux pump
P31442	Multidrug resistance protein D	efflux pump
P31462	Multidrug resistance protein MdtL	efflux pump
P31554	LPS-assembly protein LptD	efflux pump
P31668	Phosphinothricin N-acetyltransferase	product inactivation
P32010	Daunorubicin/doxorubicin resistance ATP-binding protein DrrA	efflux pump
P32011	Daunorubicin/doxorubicin resistance ABC transporter permease protein DrrB	efflux pump
P32482	Chloramphenicol resistance protein	efflux pump
P32714	Multidrug resistance outer membrane protein MdtP	efflux pump
P32715	Multidrug resistance protein MdtO	efflux pump
P32716	Multidrug resistance protein MdtN	efflux pump
P33369	Putative multidrug resistance outer membrane protein MdtQ	efflux pump
P33449	Multidrug resistance protein 1	efflux pump
P33733	Tetracycline resistance protein, class D	efflux pump
P33941	ABC transporter ATP-binding/permease protein YojI	efflux pump
P35391	Beta-lactamase	product inactivation
P35392	Beta-lactamase	product inactivation
P35393	Beta-lactamase	product inactivation
P35695	Beta-lactamase OXA-7	product inactivation
P36554	Putative multidrug resistance protein MdtD	efflux pump
P36555	Phosphoethanolamine transferase EptA	target alteration
P36556	Transcriptional regulatory protein BasR	target alteration, efflux pump
P36636	Peptide transport system ATP-binding protein SapD	efflux pump
P36638	Peptide transport system ATP-binding protein SapF	efflux pump
P36882	Chloramphenicol acetyltransferase	product inactivation
P36883	Chloramphenicol acetyltransferase	product inactivation
P36890	Tetracycline resistance protein	efflux pump
P36979	Dual-specificity RNA methyltransferase RlmN	target alteration
P37000	Putative 23S rRNA (guanine-N(1)-)-methyltransferase	target alteration
P37321	Extended-spectrum beta-lactamase PER-1	product inactivation
P37322	Beta-lactamase CARB-3	product inactivation
P37323	Beta-lactamase SHV-4	product inactivation
P37340	Multidrug resistance protein MdtK	efflux pump
P37506	Streptothricin acetyltransferase A	product inactivation
P37594	Methyl viologen resistance protein SmvA	efflux pump
P37636	Multidrug resistance protein MdtE	efflux pump
P37637	Multidrug resistance protein MdtF	efflux pump
P37639	HTH-type transcriptional regulator GadX	efflux pump
P37711	D-alanyl-D-alanine carboxypeptidase	target alteration
P37774	L-cystine transport system ATP-binding protein TcyN	efflux pump
P37870	DNA-directed RNA polymerase subunit beta	target replacement
P37972	Nickel and cobalt resistance protein CnrA	efflux pump
P38054	Cation efflux system protein CusA	efflux pump
P39115	Ribosome protection protein VmlR	target protection
P39386	Multidrug resistance protein MdtM	efflux pump
P39438	Undecaprenyl-diphosphatase (Fragment)	target alteration
P39824	Beta-lactamase	product inactivation
P39843	Multidrug resistance protein 2	efflux pump
P39886	Tetracenomycin C resistance and export protein	efflux pump
P39897	HTH-type transcriptional regulator MtrR	efflux pump
P41368	Isoleucine--tRNA ligase	target alteration
P42332	Bacitracin transport ATP-binding protein BcrA	efflux pump
P42333	Bacitracin transport permease protein BCRB	efflux pump
P42334	Bacitracin transport permease protein BcrC	efflux pump
P42423	ABC transporter ATP-binding protein YxdL	efflux pump
P42670	Puromycin resistance protein pur8	efflux pump
P42971	Penicillin-binding protein 3	target replacement
P43433	Mycinamicin-resistance protein MyrB	target alteration
P43791	Dihydrofolate reductase	product inactivation
P44927	Multidrug export protein EmrB	efflux pump
P44928	Multidrug export protein EmrA	efflux pump
P45123	Bicyclomycin resistance protein homolog	efflux pump
P45272	Multidrug resistance protein HmrM	efflux pump
P45289	Peptide transport system ATP-binding protein SapF	efflux pump
P45438	rRNA adenine N-6-methyltransferase	target alteration
P45439	rRNA adenine N-6-methyltransferase	target alteration
P45460	Beta-lactamase	product inactivation
P46104	Lincomycin resistance protein	efflux pump
P46105	Probable actinorhodin transporter	efflux pump
P49417	Chloramphenicol acetyltransferase	product inactivation
P49856	Probable guanidinium efflux system subunit GdnC	efflux pump
P49857	Probable guanidinium efflux system subunit GdnD	efflux pump
P50858	Aminoglycoside N(6')-acetyltransferase type 1	product inactivation
P50868	Chloramphenicol acetyltransferase	product inactivation
P50869	Chloramphenicol acetyltransferase	product inactivation
P50870	Streptogramin A acetyltransferase	product inactivation
P51563	Tetracycline resistance protein, class G	efflux pump
P51564	Tetracycline resistance protein, class H	efflux pump
P52002	Multidrug resistance protein MexB	efflux pump
P52067	Fosmidomycin resistance protein	product inactivation
P52146	Arsenical pump membrane protein	efflux pump
P52391	23S rRNA (adenosine(1067)-2'-O)-methyltransferase	target alteration
P52393	23S rRNA (adenosine(1067)-2'-O)-methyltransferase	target alteration
P52477	Multidrug resistance protein MexA	efflux pump
P52599	Probable multidrug resistance protein EmrK	efflux pump
P52600	Probable multidrug resistance protein EmrY	efflux pump
P52663	Imipenem-hydrolyzing beta-lactamase	product inactivation
P52664	Beta-lactamase	product inactivation
P52682	Carbapenem-hydrolyzing beta-lactamase Sme-1	product inactivation
P52699	Metallo-beta-lactamase type 2	product inactivation
P52700	Metallo-beta-lactamase L1 type 3	product inactivation
P54427	Probable beta-lactamase YbxI	product inactivation
P57170	Undecaprenyl-diphosphatase	target alteration
P57551	Multidrug resistance-like ATP-binding protein MdlA	efflux pump
P57552	Multidrug resistance-like ATP-binding protein MdlB	efflux pump
P58120	Multi-drug resistance efflux pump PmrA homolog	efflux pump
P58163	Probable multidrug resistance protein NorM	efflux pump
P58164	Multidrug resistance protein MdtK	efflux pump
P58230	HTH-type transcriptional regulator GadX	efflux pump
P58411	Macrolide export protein MacA	efflux pump
P58740	Undecaprenyl-diphosphatase 1	target alteration
P58741	Undecaprenyl-diphosphatase 2	target alteration
P58777	Chloramphenicol acetyltransferase	product inactivation
P59291	Metallothiol transferase FosB	product inactivation
P59523	Undecaprenyl-diphosphatase	target alteration
P59655	Dihydropteroate synthase	target alteration
P60281	DNA-directed RNA polymerase subunit beta	target replacement
P60863	Metallothiol transferase FosB	product inactivation
P60864	Metallothiol transferase FosB	product inactivation
P60865	Metallothiol transferase FosB	product inactivation
P60932	Undecaprenyl-diphosphatase	target alteration
P60933	Undecaprenyl-diphosphatase	target alteration
P60934	Undecaprenyl-diphosphatase	target alteration
P60935	Undecaprenyl-diphosphatase	target alteration
P60936	Undecaprenyl-diphosphatase	target alteration
P60937	Undecaprenyl-diphosphatase	target alteration
P60938	Undecaprenyl-diphosphatase	target alteration
P60939	Undecaprenyl-diphosphatase	target alteration
P60940	Undecaprenyl-diphosphatase	target alteration
P60941	Undecaprenyl-diphosphatase	target alteration
P62461	Undecaprenyl-diphosphatase 1	target alteration
P62462	Undecaprenyl-diphosphatase 2	target alteration
P62463	Undecaprenyl-diphosphatase 3	target alteration
P62464	Undecaprenyl-diphosphatase	target alteration
P62465	Undecaprenyl-diphosphatase	target alteration
P62466	Undecaprenyl-diphosphatase	target alteration
P62467	Undecaprenyl-diphosphatase	target alteration
P62577	Chloramphenicol acetyltransferase	product inactivation
P62578	Chloramphenicol acetyltransferase	product inactivation
P62579	Chloramphenicol acetyltransferase	product inactivation
P62580	Chloramphenicol acetyltransferase	product inactivation
P62593	Beta-lactamase TEM	product inactivation
P62594	Beta-lactamase TEM	product inactivation
P62967	Tetracycline resistance protein	efflux pump
P63201	HTH-type transcriptional regulator GadW	efflux pump
P63619	Arsenical pump membrane protein	efflux pump
P63620	Arsenical pump membrane protein	efflux pump
P64176	Macrolide export protein MacA	efflux pump
P64177	Macrolide export protein MacA	efflux pump
P64784	Multidrug efflux pump Tap	efflux pump
P67384	Undecaprenyl-diphosphatase	target alteration
P67385	Undecaprenyl-diphosphatase	target alteration
P67386	Undecaprenyl-diphosphatase	target alteration
P67387	Undecaprenyl-diphosphatase	target alteration
P67388	Undecaprenyl-diphosphatase	target alteration
P67389	Undecaprenyl-diphosphatase	target alteration
P67390	Undecaprenyl-diphosphatase	target alteration
P67391	Undecaprenyl-diphosphatase	target alteration
P67392	Undecaprenyl-diphosphatase	target alteration
P67394	Undecaprenyl-diphosphatase	target alteration
P67918	Beta-lactamase ROB-1	product inactivation
P67919	Beta-lactamase ROB-1	product inactivation
P67920	Beta-lactamase ROB-1	product inactivation
P67925	Bleomycin resistance protein	product inactivation
P68261	Methicillin resistance regulatory protein MecI	target replacement
P68262	Methicillin resistance regulatory protein MecI	target replacement
P68263	Methicillin resistance regulatory protein MecI	target replacement
P69210	Spermidine export protein MdtI	efflux pump
P69211	Spermidine export protein MdtI	efflux pump
P69212	Spermidine export protein MdtJ	efflux pump
P69213	Spermidine export protein MdtJ	efflux pump
P69214	Spermidine export protein MdtJ	efflux pump
P69340	Multidrug resistance protein MdtB	efflux pump
P69367	Multidrug resistance protein MdtH	efflux pump
P69368	Multidrug resistance protein MdtH	efflux pump
P69913	Carbon storage regulator	efflux pump
P69927	Multidrug resistance protein mmr	efflux pump
P69937	Guanidinium exporter	efflux pump
P69938	Guanidinium exporter	efflux pump
P70882	Tetracycline resistance protein TetQ	target protection
P71043	Putative phosphinothricin acetyltransferase YwnH	product inactivation
P72231	Elongation factor Tu	target alteration
P72533	Tetracycline resistance protein TetO	target protection
P74841	Beta-lactamase CTX-M-2	product inactivation
P74985	Arsenical pump membrane protein	efflux pump
P75830	Macrolide export protein MacA	efflux pump
P75831	Macrolide export ATP-binding/permease protein MacB	efflux pump
P75849	Hydroxyacylglutathione hydrolase GloC	product inactivation
P76112	L-amino acid N-acyltransferase MnaT	product inactivation
P76397	Multidrug resistance protein MdtA	efflux pump
P76398	Multidrug resistance protein MdtB	efflux pump
P76399	Multidrug resistance protein MdtC	efflux pump
P76473	Undecaprenyl phosphate-alpha-4-amino-4-deoxy-L-arabinose arabinosyl transferase	target alteration
P77211	Cation efflux system protein CusC	efflux pump
P77265	Multidrug resistance-like ATP-binding protein MdlA	efflux pump
P77279	Probable iron export ATP-binding protein FetA	efflux pump
P77398	Bifunctional polymyxin resistance protein ArnA	target alteration
P77757	Undecaprenyl-phosphate 4-deoxy-4-formamido-L-arabinose transferase	target alteration
P78218	Dihydrofolate reductase type 15	product inactivation
P80298	Beta-lactamase	product inactivation
P80545	Beta-lactamase	product inactivation
P81781	Beta-lactamase CARB-6	product inactivation
P85302	Beta-lactamase	product inactivation
P86889	Macrolide efflux protein A (Fragment)	efflux pump
P94177	Cation efflux system protein CzcA	efflux pump
P94186	Mercuric transport protein periplasmic component	efflux pump
P94440	Linearmycin resistance ATP-binding protein LnrL	efflux pump
P94507	Undecaprenyl-diphosphatase	target alteration
P94571	Undecaprenyl-diphosphatase BcrC	target alteration
P94958	Beta-lactamase	product inactivation
P94967	Alanine racemase	target alteration
P94968	Aminoglycoside 2'-N-acetyltransferase	product inactivation
P95524	Dihydrofolate reductase type 6	product inactivation
P95827	Macrolide efflux protein A	efflux pump
P96348	Beta-lactamase SHV-6 (Fragment)	product inactivation
P96465	Beta-lactamase L2	product inactivation
P96678	Putative arsenical pump membrane protein YdfA	efflux pump
P96712	Multidrug resistance protein 3	efflux pump
P97046	Multidrug resistance ABC transporter ATP-binding and permease protein	efflux pump
P9WFF8	Undecaprenyl-diphosphatase	target alteration
P9WFF9	Undecaprenyl-diphosphatase	target alteration
P9WFV2	Isoleucine--tRNA ligase	target alteration
P9WFV3	Isoleucine--tRNA ligase	target alteration
P9WG88	Multidrug resistance protein B homolog	efflux pump
P9WG89	Multidrug resistance protein B homolog	efflux pump
P9WG90	Multidrug resistance protein Stp	efflux pump
P9WG91	Multidrug resistance protein Stp	efflux pump
P9WGF0	Multidrug resistance protein Mmr	efflux pump
P9WGF1	Multidrug resistance protein Mmr	efflux pump
P9WGM8	Response regulator MprA	efflux pump
P9WGM9	Response regulator MprA	efflux pump
P9WGY8	DNA-directed RNA polymerase subunit beta	target replacement
P9WGY9	DNA-directed RNA polymerase subunit beta	target replacement
P9WJW8	Drug efflux pump JefA	efflux pump
P9WJW9	Drug efflux pump JefA	efflux pump
P9WJX6	Chloramphenicol efflux pump MT0201	efflux pump
P9WJX7	Chloramphenicol efflux pump Rv0191	efflux pump
P9WJX8	Multidrug efflux pump Tap	efflux pump
P9WJX9	Multidrug efflux pump Tap	efflux pump
P9WJY3	Probable triacylglyceride transporter Rv1410c	efflux pump
P9WKD2	Beta-lactamase	product inactivation
P9WKD3	Beta-lactamase	product inactivation
P9WND1	Dihydropteroate synthase	target alteration
P9WQG8	Aminoglycoside 2'-N-acetyltransferase	product inactivation
P9WQG9	Aminoglycoside 2'-N-acetyltransferase	product inactivation
P9WQL6	Fluoroquinolones export ATP-binding protein MT2762	efflux pump
P9WQL7	Fluoroquinolones export ATP-binding protein Rv2688c	efflux pump
P9WQL8	Doxorubicin resistance ATP-binding protein DrrA	efflux pump
P9WQL9	Doxorubicin resistance ATP-binding protein DrrA	efflux pump
Q00014	rRNA adenine N-6-methyltransferase	target alteration
Q00538	Methylenomycin A resistance protein	efflux pump
Q00923	Hydroxyurea phosphotransferase	product inactivation
Q00937	Tetracycline resistance protein TetQ	target protection
Q00982	Beta-lactamase OXA-5	product inactivation
Q00983	Beta-lactamase LCR-1	product inactivation
Q01166	Beta-lactamase	product inactivation
Q01255	Arsenical pump membrane protein	efflux pump
Q01515	Aminoglycoside N(3)-acetyltransferase III	product inactivation
Q01911	Flavin-dependent monooxygenase	efflux pump
Q01WE6	Undecaprenyl-diphosphatase	target alteration
Q02149	Probable aminoglycoside 3'-phosphotransferase	product inactivation
Q02607	rRNA adenine N-6-methyltransferase	target alteration
Q02652	Tetracycline resistance protein TetM	target protection
Q02736	Chloramphenicol acetyltransferase	product inactivation
Q02LA5	Undecaprenyl-diphosphatase	target alteration
Q02MI4	Macrolide export ATP-binding/permease protein MacB	efflux pump
Q02R24	Undecaprenyl-phosphate 4-deoxy-4-formamido-L-arabinose transferase	target alteration
Q02R25	Bifunctional polymyxin resistance protein ArnA	target alteration
Q02R27	Undecaprenyl phosphate-alpha-4-amino-4-deoxy-L-arabinose arabinosyl transferase	target alteration
Q02VT8	Undecaprenyl-diphosphatase	target alteration
Q03058	Chloramphenicol acetyltransferase	product inactivation
Q03170	Beta-lactamase PSE-1	product inactivation
Q03377	Metallothiol transferase FosB	product inactivation
Q03447	Aminoglycoside 3'-phosphotransferase	product inactivation
Q03680	Beta-lactamase 1	product inactivation
Q03986	rRNA adenine N-6-methyltransferase	target alteration
Q03AR6	Undecaprenyl-diphosphatase	target alteration
Q03MN6	Undecaprenyl-diphosphatase	target alteration
Q03ZT9	Undecaprenyl-diphosphatase	target alteration
Q04515	Dihydrofolate reductase type A10	product inactivation
Q04720	rRNA adenine N-6-methyltransferase	target alteration
Q04733	Cephamycin export protein CmcT	efflux pump
Q04BL0	Undecaprenyl-diphosphatase	target alteration
Q04D15	Undecaprenyl-diphosphatase 2	target alteration
Q04FK3	Undecaprenyl-diphosphatase 1	target alteration
Q04M23	Undecaprenyl-diphosphatase	target alteration
Q04SA1	Undecaprenyl-diphosphatase	target alteration
Q050C7	Undecaprenyl-diphosphatase	target alteration
Q05709	D-specific alpha-keto acid dehydrogenase	target alteration
Q06239	Regulatory protein VanR	target alteration
Q06240	Sensor protein VanS	target alteration
Q06241	D-alanyl-D-alanine dipeptidase	target alteration
Q06242	Protein VanZ	target alteration
Q06316	Beta-lactamase	product inactivation
Q06650	Beta-lactamase	product inactivation
Q06778	Beta-lactamase OXA-11	product inactivation
Q06893	Vancomycin B-type resistance protein VanB	target alteration
Q06DK7	Flavin-dependent monooxygenase	efflux pump
Q07282	Tetracycline resistance protein, class E	efflux pump
Q07448	Spectinomycin 9-adenylyltransferase	product inactivation
Q07868	Penicillin-binding protein 2B	target replacement
Q07UC1	Undecaprenyl-diphosphatase	target alteration
Q07YT7	Undecaprenyl-diphosphatase	target alteration
Q08325	16S rRNA (guanine(1405)-N(7))-methyltransferase	target alteration
Q08425	Tetracycline resistance protein TetQ	target protection
Q0AAG2	Undecaprenyl-diphosphatase	target alteration
Q0AJJ0	Undecaprenyl-diphosphatase	target alteration
Q0ATH6	Undecaprenyl-diphosphatase	target alteration
Q0AXH9	Undecaprenyl-diphosphatase	target alteration
Q0BGG1	Undecaprenyl-diphosphatase 2	target alteration
Q0BHM0	Undecaprenyl-diphosphatase 1	target alteration
Q0BTT3	Undecaprenyl-diphosphatase	target alteration
Q0C1N8	Macrolide export ATP-binding/permease protein MacB	efflux pump
Q0C618	Undecaprenyl-diphosphatase	target alteration
Q0HG46	Undecaprenyl-diphosphatase	target alteration
Q0HSD9	Undecaprenyl-diphosphatase	target alteration
Q0I740	Undecaprenyl-diphosphatase	target alteration
Q0K7S4	Undecaprenyl-diphosphatase	target alteration
Q0PAR0	Macrolide export ATP-binding/permease protein MacB	efflux pump
Q0RHR9	Undecaprenyl-diphosphatase 3	target alteration
Q0RKT0	Undecaprenyl-diphosphatase 1	target alteration
Q0SAA3	Lysylphosphatidylglycerol biosynthesis bifunctional protein LysX	target alteration
Q0SIC2	Undecaprenyl-diphosphatase	target alteration
Q0SNQ3	Undecaprenyl-diphosphatase	target alteration
Q0STN1	Undecaprenyl-diphosphatase	target alteration
Q0SYK8	Purine ribonucleoside efflux pump NepI	efflux pump
Q0SYP9	Multidrug resistance protein MdtL	efflux pump
Q0T0K6	Undecaprenyl-diphosphatase	target alteration
Q0T2M6	Undecaprenyl phosphate-alpha-4-amino-4-deoxy-L-arabinose arabinosyl transferase	target alteration
Q0T2M8	Bifunctional polymyxin resistance protein ArnA	target alteration
Q0T2M9	Undecaprenyl-phosphate 4-deoxy-4-formamido-L-arabinose transferase	target alteration
Q0T353	Putative multidrug resistance protein MdtD	efflux pump
Q0T354	Multidrug resistance protein MdtC	efflux pump
Q0T4A9	Multidrug resistance protein MdtK	efflux pump
Q0T4H7	Spermidine export protein MdtJ	efflux pump
Q0T4H8	Spermidine export protein MdtI	efflux pump
Q0T5W7	Multidrug resistance protein MdtH	efflux pump
Q0TAZ8	Multidrug resistance protein MdtL	efflux pump
Q0TB40	Purine ribonucleoside efflux pump NepI	efflux pump
Q0TD49	Undecaprenyl-diphosphatase	target alteration
Q0TFI5	Undecaprenyl phosphate-alpha-4-amino-4-deoxy-L-arabinose arabinosyl transferase	target alteration
Q0TFI7	Bifunctional polymyxin resistance protein ArnA	target alteration
Q0TFI8	Undecaprenyl-phosphate 4-deoxy-4-formamido-L-arabinose transferase	target alteration
Q0TG13	Putative multidrug resistance protein MdtD	efflux pump
Q0TG14	Multidrug resistance protein MdtC	efflux pump
Q0TG15	Multidrug resistance protein MdtB	efflux pump
Q0TG16	Multidrug resistance protein MdtA	efflux pump
Q0THG4	Multidrug resistance protein MdtK	efflux pump
Q0THM8	Spermidine export protein MdtJ	efflux pump
Q0THM9	Spermidine export protein MdtI	efflux pump
Q0TJ09	Multidrug resistance protein MdtH	efflux pump
Q0TJ20	Multidrug resistance protein MdtG	efflux pump
Q0TJH0	Macrolide export ATP-binding/permease protein MacB	efflux pump
Q0TRA5	Undecaprenyl-diphosphatase	target alteration
Q0VQH0	Undecaprenyl-diphosphatase	target alteration
Q0VT01	Macrolide export ATP-binding/permease protein MacB	efflux pump
Q0WF87	Spermidine export protein MdtI	efflux pump
Q10VH5	Undecaprenyl-diphosphatase	target alteration
Q11CA6	Undecaprenyl-diphosphatase	target alteration
Q11WJ0	Undecaprenyl-diphosphatase	target alteration
Q127N8	Undecaprenyl-diphosphatase	target alteration
Q12KC1	Undecaprenyl-diphosphatase	target alteration
Q13ES7	Undecaprenyl-diphosphatase	target alteration
Q13V13	Undecaprenyl-diphosphatase 1	target alteration
Q13W85	Undecaprenyl-diphosphatase 2	target alteration
Q15BH7	Aminoglycoside N(6')-acetyltransferase type 1	product inactivation
Q15X16	Undecaprenyl-diphosphatase	target alteration
Q16DZ2	Undecaprenyl-diphosphatase	target alteration
Q184H7	Undecaprenyl-diphosphatase 2	target alteration
Q18BJ5	Undecaprenyl-diphosphatase 1	target alteration
Q1AWM0	Undecaprenyl-diphosphatase	target alteration
Q1B3X8	Response regulator MprA	efflux pump
Q1B571	Virginiamycin B lyase	product inactivation
Q1B769	Undecaprenyl-diphosphatase	target alteration
Q1BPZ6	Macrolide export ATP-binding/permease protein MacB	efflux pump
Q1BXA8	Undecaprenyl-diphosphatase 2	target alteration
Q1BYF5	Undecaprenyl-diphosphatase 1	target alteration
Q1C369	Undecaprenyl-diphosphatase	target alteration
Q1C5L8	Putative multidrug resistance protein MdtD	efflux pump
Q1C5L9	Multidrug resistance protein MdtC	efflux pump
Q1C5M1	Multidrug resistance protein MdtA	efflux pump
Q1C5W7	Macrolide export ATP-binding/permease protein MacB 2	efflux pump
Q1C741	Undecaprenyl-phosphate 4-deoxy-4-formamido-L-arabinose transferase	target alteration
Q1C742	Bifunctional polymyxin resistance protein ArnA	target alteration
Q1C744	Undecaprenyl phosphate-alpha-4-amino-4-deoxy-L-arabinose arabinosyl transferase	target alteration
Q1C769	Multidrug resistance protein MdtK	efflux pump
Q1C803	Spermidine export protein MdtI	efflux pump
Q1C804	Spermidine export protein MdtJ	efflux pump
Q1C833	Multidrug resistance protein MdtH	efflux pump
Q1CA99	Macrolide export ATP-binding/permease protein MacB 1	efflux pump
Q1CGD7	Macrolide export ATP-binding/permease protein MacB 2	efflux pump
Q1CIH6	Undecaprenyl-phosphate 4-deoxy-4-formamido-L-arabinose transferase	target alteration
Q1CIH7	Bifunctional polymyxin resistance protein ArnA	target alteration
Q1CIH9	Undecaprenyl phosphate-alpha-4-amino-4-deoxy-L-arabinose arabinosyl transferase	target alteration
Q1CIK5	Multidrug resistance protein MdtK	efflux pump
Q1CJF4	Spermidine export protein MdtI	efflux pump
Q1CJF5	Spermidine export protein MdtJ	efflux pump
Q1CJI3	Multidrug resistance protein MdtH	efflux pump
Q1CJW8	Macrolide export ATP-binding/permease protein MacB 1	efflux pump
Q1CK59	Multidrug resistance protein MdtA	efflux pump
Q1CK61	Multidrug resistance protein MdtC	efflux pump
Q1CK62	Putative multidrug resistance protein MdtD	efflux pump
Q1CMD9	Undecaprenyl-diphosphatase	target alteration
Q1CY86	Undecaprenyl-diphosphatase	target alteration
Q1GB63	Undecaprenyl-diphosphatase	target alteration
Q1GCR3	Undecaprenyl-diphosphatase	target alteration
Q1GR76	Undecaprenyl-diphosphatase	target alteration
Q1GY95	Undecaprenyl-diphosphatase	target alteration
Q1I7I9	Macrolide export ATP-binding/permease protein MacB 2	efflux pump
Q1I966	Macrolide export ATP-binding/permease protein MacB 1	efflux pump
Q1I9H0	Undecaprenyl-diphosphatase	target alteration
Q1IPW7	Undecaprenyl-diphosphatase	target alteration
Q1IZI4	Undecaprenyl-diphosphatase	target alteration
Q1J8H6	Undecaprenyl-diphosphatase	target alteration
Q1JDJ9	Undecaprenyl-diphosphatase	target alteration
Q1JIM0	Undecaprenyl-diphosphatase	target alteration
Q1JNH1	Undecaprenyl-diphosphatase	target alteration
Q1LJU8	Undecaprenyl-diphosphatase	target alteration
Q1LSL8	Undecaprenyl-diphosphatase	target alteration
Q1LTM2	Multidrug resistance protein MdtH	efflux pump
Q1MMI4	Undecaprenyl-diphosphatase	target alteration
Q1MQW6	Undecaprenyl-diphosphatase	target alteration
Q1Q993	Undecaprenyl-diphosphatase	target alteration
Q1QDA8	Macrolide export ATP-binding/permease protein MacB	efflux pump
Q1QRR2	Undecaprenyl-diphosphatase	target alteration
Q1QZ92	Undecaprenyl-diphosphatase	target alteration
Q1R4M4	Multidrug resistance protein MdtL	efflux pump
Q1R4R9	Purine ribonucleoside efflux pump NepI	efflux pump
Q1R6S4	Undecaprenyl-diphosphatase	target alteration
Q1R9F8	Undecaprenyl phosphate-alpha-4-amino-4-deoxy-L-arabinose arabinosyl transferase	target alteration
Q1R9G0	Bifunctional polymyxin resistance protein ArnA	target alteration
Q1R9G1	Undecaprenyl-phosphate 4-deoxy-4-formamido-L-arabinose transferase	target alteration
Q1R9Z4	Putative multidrug resistance protein MdtD	efflux pump
Q1R9Z5	Multidrug resistance protein MdtC	efflux pump
Q1R9Z6	Multidrug resistance protein MdtB	efflux pump
Q1RBD2	Multidrug resistance protein MdtK	efflux pump
Q1RBJ8	Spermidine export protein MdtJ	efflux pump
Q1RBJ9	Spermidine export protein MdtI	efflux pump
Q1RD92	Multidrug resistance protein MdtH	efflux pump
Q1RDA5	Multidrug resistance protein MdtG	efflux pump
Q1RE44	Macrolide export ATP-binding/permease protein MacB	efflux pump
Q217L2	Macrolide export ATP-binding/permease protein MacB	efflux pump
Q21C73	Undecaprenyl-diphosphatase	target alteration
Q21II7	Undecaprenyl-diphosphatase	target alteration
Q21XE6	Undecaprenyl-diphosphatase	target alteration
Q28VU8	Undecaprenyl-diphosphatase	target alteration
Q2EHL7	Toxin and drug export protein A	efflux pump
Q2EHL8	Macrolide export ATP-binding/permease protein MacB	efflux pump
Q2FEG3	Metallothiol transferase FosB	product inactivation
Q2FEW4	Multidrug resistance efflux pump SepA	efflux pump
Q2FH03	Quinolone resistance protein NorB	efflux pump
Q2FH23	Response regulator ArlR	efflux pump
Q2FHM0	Probable dual-specificity RNA methyltransferase RlmN	target alteration
Q2FIV6	Undecaprenyl-diphosphatase	target alteration
Q2FIX9	Sensor protein kinase GraS	target alteration
Q2FJS9	Multidrug export protein MepA	efflux pump
Q2FKN7	Sensor protein kinase WalK	target alteration
Q2FVT3	Metallothiol transferase FosB	product inactivation
Q2FW84	Multidrug resistance efflux pump SepA	efflux pump
Q2FYJ5	Quinolone resistance protein NorB	efflux pump
Q2FZ66	Probable dual-specificity RNA methyltransferase RlmN	target alteration
Q2G0B1	HTH-type transcriptional regulator MgrA	efflux pump
Q2G0B4	Undecaprenyl-diphosphatase	target alteration
Q2G140	Multidrug export protein MepA	efflux pump
Q2G2M2	Phosphatidylglycerol lysyltransferase	target alteration
Q2G2U4	Sensor protein kinase WalK	target alteration
Q2G3F4	Undecaprenyl-diphosphatase	target alteration
Q2G506	ATM1-type heavy metal exporter	efflux pump
Q2IMA5	Undecaprenyl-diphosphatase	target alteration
Q2IXX0	Macrolide export ATP-binding/permease protein MacB	efflux pump
Q2J2D8	Undecaprenyl-diphosphatase	target alteration
Q2J4I7	Undecaprenyl-diphosphatase 3	target alteration
Q2J7L5	16S rRNA (guanine(1405)-N(7))-methyltransferase	target alteration
Q2J987	Undecaprenyl-diphosphatase 2	target alteration
Q2JJZ9	Undecaprenyl-diphosphatase	target alteration
Q2JXZ9	Undecaprenyl-diphosphatase	target alteration
Q2KDF4	Undecaprenyl-diphosphatase	target alteration
Q2KVS6	Macrolide export ATP-binding/permease protein MacB	efflux pump
Q2KX31	Undecaprenyl-diphosphatase	target alteration
Q2LXE8	Undecaprenyl-diphosphatase	target alteration
Q2MEY3	16S rRNA (adenine(1408)-N(1))-methyltransferase	target alteration
Q2N736	Undecaprenyl-diphosphatase	target alteration
Q2NRV6	Undecaprenyl-phosphate 4-deoxy-4-formamido-L-arabinose transferase	target alteration
Q2NRV7	Bifunctional polymyxin resistance protein ArnA	target alteration
Q2NRV9	Undecaprenyl phosphate-alpha-4-amino-4-deoxy-L-arabinose arabinosyl transferase 2	target alteration
Q2NSZ1	Macrolide export ATP-binding/permease protein MacB	efflux pump
Q2NTK5	Multidrug resistance protein MdtH	efflux pump
Q2NVC0	Spermidine export protein MdtJ	efflux pump
Q2NVC1	Spermidine export protein MdtI	efflux pump
Q2NWA9	Undecaprenyl phosphate-alpha-4-amino-4-deoxy-L-arabinose arabinosyl transferase 1	target alteration
Q2NWE3	Undecaprenyl-diphosphatase	target alteration
Q2NXJ3	Undecaprenyl-diphosphatase	target alteration
Q2PT27	Pentapeptide repeat protein QnrB4	target protection
Q2RKY8	Undecaprenyl-diphosphatase	target alteration
Q2RPB4	Macrolide export ATP-binding/permease protein MacB	efflux pump
Q2RTE2	Undecaprenyl-diphosphatase 2	target alteration
Q2RYH3	Undecaprenyl-diphosphatase 1	target alteration
Q2S5P8	Undecaprenyl-diphosphatase	target alteration
Q2SL19	Undecaprenyl-diphosphatase	target alteration
Q2SMN9	Macrolide export ATP-binding/permease protein MacB	efflux pump
Q2SUY6	Undecaprenyl-diphosphatase 2	target alteration
Q2SYE1	Undecaprenyl-diphosphatase 1	target alteration
Q2T4B3	Macrolide export ATP-binding/permease protein MacB	efflux pump
Q2W724	Undecaprenyl-diphosphatase 2	target alteration
Q2W9Z8	Undecaprenyl-diphosphatase 1	target alteration
Q2Y6P3	Undecaprenyl-diphosphatase	target alteration
Q2YJP6	Undecaprenyl-diphosphatase	target alteration
Q2YRG7	Macrolide export ATP-binding/permease protein MacB	efflux pump
Q2YSP8	Undecaprenyl-diphosphatase	target alteration
Q2YSS1	Sensor protein kinase GraS	target alteration
Q2YUQ2	Sensor protein kinase WalK	target alteration
Q2YVH4	Multidrug export protein MepA	efflux pump
Q2YXJ8	Probable dual-specificity RNA methyltransferase RlmN	target alteration
Q2YY03	Response regulator ArlR	efflux pump
Q2YY45	Quinolone resistance protein NorB	efflux pump
Q2YYH7	Multidrug resistance efflux pump SepA	efflux pump
Q30UH8	Undecaprenyl-diphosphatase	target alteration
Q310A3	Undecaprenyl-diphosphatase	target alteration
Q31B42	Undecaprenyl-diphosphatase	target alteration
Q31EL5	Undecaprenyl-diphosphatase	target alteration
Q31LS2	Undecaprenyl-diphosphatase	target alteration
Q31US4	Purine ribonucleoside efflux pump NepI	efflux pump
Q31UW4	Multidrug resistance protein MdtL	efflux pump
Q31WX8	Undecaprenyl-diphosphatase	target alteration
Q31YK0	Undecaprenyl phosphate-alpha-4-amino-4-deoxy-L-arabinose arabinosyl transferase	target alteration
Q31YK2	Bifunctional polymyxin resistance protein ArnA	target alteration
Q31YK3	Undecaprenyl-phosphate 4-deoxy-4-formamido-L-arabinose transferase	target alteration
Q31ZC0	Multidrug resistance protein MdtH	efflux pump
Q320V5	Spermidine export protein MdtI	efflux pump
Q320V6	Spermidine export protein MdtJ	efflux pump
Q321C2	Multidrug resistance protein MdtK	efflux pump
Q323D8	Putative multidrug resistance protein MdtD	efflux pump
Q323D9	Multidrug resistance protein MdtC	efflux pump
Q323E0	Multidrug resistance protein MdtB	efflux pump
Q323M3	Macrolide export ATP-binding/permease protein MacB	efflux pump
Q323U7	Multidrug transporter MdfA	efflux pump
Q328Z8	Multidrug resistance protein MdtL	efflux pump
Q329F4	Purine ribonucleoside efflux pump NepI	efflux pump
Q32DT1	Undecaprenyl phosphate-alpha-4-amino-4-deoxy-L-arabinose arabinosyl transferase	target alteration
Q32DT3	Bifunctional polymyxin resistance protein ArnA	target alteration
Q32DT4	Undecaprenyl-phosphate 4-deoxy-4-formamido-L-arabinose transferase	target alteration
Q32DZ9	Macrolide export ATP-binding/permease protein MacB	efflux pump
Q32ES6	Multidrug resistance protein MdtH	efflux pump
Q32FA7	Multidrug resistance protein MdtK	efflux pump
Q32G65	Spermidine export protein MdtI	efflux pump
Q32G66	Spermidine export protein MdtJ	efflux pump
Q33DX5	16S rRNA (guanine(1405)-N(7))-methyltransferase	target alteration
Q38VP0	Undecaprenyl-diphosphatase	target alteration
Q399M3	Macrolide export ATP-binding/permease protein MacB	efflux pump
Q39HK8	Undecaprenyl-diphosphatase 2	target alteration
Q39IU8	Undecaprenyl-diphosphatase 1	target alteration
Q39QX7	Undecaprenyl-diphosphatase	target alteration
Q3A6V2	Undecaprenyl-diphosphatase	target alteration
Q3ACY1	Undecaprenyl-diphosphatase	target alteration
Q3AH68	Undecaprenyl-diphosphatase	target alteration
Q3ATC0	Undecaprenyl-diphosphatase	target alteration
Q3ATR5	Macrolide export ATP-binding/permease protein MacB	efflux pump
Q3AZZ7	Undecaprenyl-diphosphatase	target alteration
Q3B5J7	Macrolide export ATP-binding/permease protein MacB	efflux pump
Q3B5P9	Undecaprenyl-diphosphatase	target alteration
Q3BZ95	Undecaprenyl-diphosphatase	target alteration
Q3IDA4	Undecaprenyl-diphosphatase 2	target alteration
Q3IHV1	Undecaprenyl-diphosphatase 1	target alteration
Q3IYQ0	Undecaprenyl-diphosphatase	target alteration
Q3J7B5	Undecaprenyl-diphosphatase	target alteration
Q3JGG7	Macrolide export ATP-binding/permease protein MacB	efflux pump
Q3JPL1	Undecaprenyl-diphosphatase 2	target alteration
Q3JTI8	Undecaprenyl-diphosphatase 1	target alteration
Q3K3N4	Undecaprenyl-diphosphatase	target alteration
Q3K9J0	Undecaprenyl-diphosphatase 2	target alteration
Q3KCB9	Undecaprenyl phosphate-alpha-4-amino-4-deoxy-L-arabinose arabinosyl transferase 2	target alteration
Q3KCC1	Bifunctional polymyxin resistance protein ArnA	target alteration
Q3KCC2	Undecaprenyl-phosphate 4-deoxy-4-formamido-L-arabinose transferase	target alteration
Q3KCC9	Undecaprenyl phosphate-alpha-4-amino-4-deoxy-L-arabinose arabinosyl transferase 1	target alteration
Q3KD12	Undecaprenyl-diphosphatase 1	target alteration
Q3KE48	Macrolide export ATP-binding/permease protein MacB 2	efflux pump
Q3KF57	Macrolide export ATP-binding/permease protein MacB 1	efflux pump
Q3MFH9	Undecaprenyl-diphosphatase	target alteration
Q3SFG5	Undecaprenyl-diphosphatase	target alteration
Q3SQZ1	Macrolide export ATP-binding/permease protein MacB	efflux pump
Q3SWA8	Undecaprenyl-diphosphatase	target alteration
Q3YWE6	Purine ribonucleoside efflux pump NepI	efflux pump
Q3YWK3	Multidrug resistance protein MdtL	efflux pump
Q3YXI5	Undecaprenyl-diphosphatase	target alteration
Q3YZU9	Undecaprenyl phosphate-alpha-4-amino-4-deoxy-L-arabinose arabinosyl transferase	target alteration
Q3YZV1	Bifunctional polymyxin resistance protein ArnA	target alteration
Q3YZV2	Undecaprenyl-phosphate 4-deoxy-4-formamido-L-arabinose transferase	target alteration
Q3Z0C7	Putative multidrug resistance protein MdtD	efflux pump
Q3Z0C8	Multidrug resistance protein MdtC	efflux pump
Q3Z0C9	Multidrug resistance protein MdtB	efflux pump
Q3Z1V2	Spermidine export protein MdtI	efflux pump
Q3Z1V3	Spermidine export protein MdtJ	efflux pump
Q3Z218	Multidrug resistance protein MdtK	efflux pump
Q3Z351	Multidrug resistance protein MdtH	efflux pump
Q3Z3Q4	Macrolide export ATP-binding/permease protein MacB	efflux pump
Q43899	Aminoglycoside N(6')-acetyltransferase type 1	product inactivation
Q44056	Beta-lactamase AER-1	product inactivation
Q44057	Aminoglycoside N(6')-acetyltransferase type 1	product inactivation
Q44245	Aminoglycoside N(6')-acetyltransferase type 1	product inactivation
Q44674	Beta-lactamase	product inactivation
Q45726	Beta-lactamase	product inactivation
Q46306	Tetracycline resistance protein TetP	target protection
Q46L84	Undecaprenyl-diphosphatase	target alteration
Q47066	Beta-lactamase Toho-1	product inactivation
Q474P6	Undecaprenyl-diphosphatase	target alteration
Q47744	Regulatory protein VanRB	target alteration
Q47745	Sensor protein VanSB	target alteration
Q47746	D-alanyl-D-alanine carboxypeptidase	target alteration
Q47747	Vancomycin B-type resistance protein VanW	target alteration
Q47748	D-specific alpha-keto acid dehydrogenase	target alteration
Q47749	D-alanyl-D-alanine dipeptidase	target alteration
Q47810	Tetracycline resistance protein TetM from transposon TnFO1	target protection
Q478U2	Undecaprenyl-diphosphatase	target alteration
Q47NU8	Undecaprenyl-diphosphatase	target alteration
Q47W31	Undecaprenyl-diphosphatase	target alteration
Q48406	Beta-lactamase TEM-12	product inactivation
Q48712	Tetracycline resistance protein TetS	target protection
Q48743	Beta-lactamase	product inactivation
Q48791	Tetracycline resistance protein TetS	target protection
Q48HY9	Undecaprenyl phosphate-alpha-4-amino-4-deoxy-L-arabinose arabinosyl transferase	target alteration
Q48HZ1	Bifunctional polymyxin resistance protein ArnA	target alteration
Q48HZ2	Undecaprenyl-phosphate 4-deoxy-4-formamido-L-arabinose transferase	target alteration
Q48JI5	Undecaprenyl-diphosphatase	target alteration
Q48KB2	Macrolide export ATP-binding/permease protein MacB	efflux pump
Q48VA9	Undecaprenyl-diphosphatase	target alteration
Q49157	Aminoglycoside 2'-N-acetyltransferase	product inactivation
Q49184	Dihydropteroate synthase type-1	target alteration
Q492K8	Multidrug resistance protein MdtH	efflux pump
Q493X5	Undecaprenyl-diphosphatase	target alteration
Q49VC5	Multidrug export protein MepA	efflux pump
Q49VN0	Undecaprenyl-diphosphatase	target alteration
Q49VY9	Metallothiol transferase FosB	product inactivation
Q49WZ9	Probable dual-specificity RNA methyltransferase RlmN	target alteration
Q49ZB2	Multidrug resistance efflux pump SepA	efflux pump
Q4FNI5	Undecaprenyl-diphosphatase	target alteration
Q4FR05	Undecaprenyl-diphosphatase	target alteration
Q4FU75	Macrolide export ATP-binding/permease protein MacB	efflux pump
Q4JVN6	Undecaprenyl-diphosphatase 2	target alteration
Q4JXD8	Undecaprenyl-diphosphatase 1	target alteration
Q4K884	Undecaprenyl phosphate-alpha-4-amino-4-deoxy-L-arabinose arabinosyl transferase 2	target alteration
Q4K9A4	Macrolide export ATP-binding/permease protein MacB 2	efflux pump
Q4KC13	Undecaprenyl-diphosphatase	target alteration
Q4KC80	Undecaprenyl phosphate-alpha-4-amino-4-deoxy-L-arabinose arabinosyl transferase 1	target alteration
Q4KC82	Bifunctional polymyxin resistance protein ArnA	target alteration
Q4KC83	Undecaprenyl-phosphate 4-deoxy-4-formamido-L-arabinose transferase	target alteration
Q4KES7	Macrolide export ATP-binding/permease protein MacB 1	efflux pump
Q4L2Y9	Metallothiol transferase FosB	product inactivation
Q4L4A6	Undecaprenyl-diphosphatase	target alteration
Q4L5R9	Probable dual-specificity RNA methyltransferase RlmN	target alteration
Q4L605	Bifunctional AAC/APH	product inactivation
Q4L667	Phosphatidylglycerol lysyltransferase	target alteration
Q4L843	Multidrug resistance efflux pump SepA	efflux pump
Q4L8N9	Multidrug export protein MepA	efflux pump
Q4V093	Undecaprenyl-diphosphatase	target alteration
Q4VR96	Probable nucleotidyltransferase	product inactivation
Q4VR99	Spectinomycin 9-adenylyltransferase	product inactivation
Q4ZS30	Undecaprenyl-diphosphatase	target alteration
Q4ZSZ0	Undecaprenyl phosphate-alpha-4-amino-4-deoxy-L-arabinose arabinosyl transferase	target alteration
Q4ZSZ2	Bifunctional polymyxin resistance protein ArnA	target alteration
Q4ZSZ3	Undecaprenyl-phosphate 4-deoxy-4-formamido-L-arabinose transferase	target alteration
Q4ZT65	Macrolide export ATP-binding/permease protein MacB 2	efflux pump
Q4ZV10	Macrolide export ATP-binding/permease protein MacB 1	efflux pump
Q50919	Mercuric transport protein MerC	efflux pump
Q51238	Tetracycline resistance protein TetM	target protection
Q51355	Beta-lactamase CARB-4	product inactivation
Q51397	Outer membrane protein OprJ	efflux pump
Q51429	Beta-lactamase OXA-3	product inactivation
Q51487	Outer membrane protein OprM	efflux pump
Q51574	Beta-lactamase OXA-15	product inactivation
Q51770	Mercuric transport protein periplasmic component	efflux pump
Q52107	Mercuric transport protein periplasmic component	efflux pump
Q52360	Tetracycline resistance protein TetQ	target protection
Q52424	Aminoglycoside 2'-N-acetyltransferase	product inactivation
Q52S23	Bifunctional AAC/APH	product inactivation
Q53685	Oleandomycin glycosyltransferase	product inactivation
Q53770	Tetracycline resistance protein TetM	target protection
Q54001	Outer membrane protein TolC	efflux pump
Q54277	Dihydrofolate reductase	product inactivation
Q54387	Macrolide glycosyltransferase	product inactivation
Q54441	Aminoglycoside N(6')-acetyltransferase type 1	product inactivation
Q54463	Mercuric transport protein periplasmic component	efflux pump
Q54801	Dihydrofolate reductase	product inactivation
Q54807	Tetracycline resistance protein TetM from transposon Tn5251	target protection
Q55002	Oxytetracycline resistance protein	target alteration
Q55317	Metallothiol transferase FosB	product inactivation
Q55339	Quaternary ammonium compound-resistance protein QacC	efflux pump
Q55364	Probable multidrug resistance protein NorM	efflux pump
Q55684	Undecaprenyl-diphosphatase	target alteration
Q56148	Chloramphenicol 3-O phosphotransferase	product inactivation
Q56415	Glutathione transferase FosA	product inactivation
Q57124	Uncharacterized transporter HI_0895	efflux pump
Q57146	Phosphinothricin N-acetyltransferase	product inactivation
Q576S3	Undecaprenyl-diphosphatase	target alteration
Q57HZ5	Multidrug resistance protein MdtL	efflux pump
Q57JQ4	Undecaprenyl-diphosphatase	target alteration
Q57M54	Undecaprenyl phosphate-alpha-4-amino-4-deoxy-L-arabinose arabinosyl transferase	target alteration
Q57M56	Undecaprenyl-phosphate 4-deoxy-4-formamido-L-arabinose transferase	target alteration
Q57MM4	Multidrug resistance protein MdtC	efflux pump
Q57MM5	Multidrug resistance protein MdtB	efflux pump
Q57PF4	Spermidine export protein MdtI	efflux pump
Q57PF5	Spermidine export protein MdtJ	efflux pump
Q57PL1	Multidrug resistance protein MdtK	efflux pump
Q57QC3	Virulence transcriptional regulatory protein PhoP	target alteration, efflux pump
Q57QC4	Virulence sensor histidine kinase PhoQ	target alteration, efflux pump
Q57QJ1	Multidrug resistance protein MdtH	efflux pump
Q57QK4	Multidrug resistance protein MdtG	efflux pump
Q57R58	Macrolide export ATP-binding/permease protein MacB	efflux pump
[truncated: 600 more rows]
