# Supplementary material for: A Comprehensive Self-Resistance Gene Database for Natural-Product Discovery with an Application to Marine Bacterial Genome Mining
Source: Int J Mol Sci. 2023 Aug 4;24(15):12446. doi: 10.3390/ijms241512446 (PMC10419868; doi:10.3390/ijms241512446)
Supplement: Supplementary file 1 [file ijms-24-12446-s001.zip › Supplementary Table S2.xlsx]

## Sheet: genome_taxonomy
Supplementary Table S2. MarRef Genome Taxonomy Information
NCBI Assembly Name	Kingdom	Phylum	Class	Order	Family	Genus	species	Organism
GCA_000007185.1	Archaea	Methanobacteriota_A	Methanopyri	Methanopyrales	Methanopyraceae	Methanopyrus	Methanopyrus kandleri	Methanopyrus kandleri AV19
GCA_000007225.1	Archaea	Thermoproteota	Thermoproteia	Thermoproteales	Thermoproteaceae	Pyrobaculum	Pyrobaculum aerophilum	Pyrobaculum aerophilum str. IM2
GCA_000007305.1	Archaea	Methanobacteriota_B	Thermococci	Thermococcales	Thermococcaceae	Pyrococcus	Pyrococcus furiosus	Pyrococcus furiosus DSM 3638
GCA_000007345.1	Archaea	Halobacteriota	Methanosarcinia	Methanosarcinales	Methanosarcinaceae	Methanosarcina	Methanosarcina acetivorans	Methanosarcina acetivorans C2A
GCA_000007925.1	Bacteria	Cyanobacteria	Cyanobacteriia	PCC-6307	Cyanobiaceae	Prochlorococcus	Prochlorococcus marinus	Prochlorococcus marinus subsp. marinus str. CCMP1375
GCA_000008085.1	Archaea	Nanoarchaeota	Nanoarchaeia	Nanoarchaeales	Nanoarchaeaceae	Nanoarchaeum	Nanoarchaeum equitans	Nanoarchaeum equitans Kin4-M
GCA_000008465.1	Bacteria	Proteobacteria	Gammaproteobacteria	Enterobacterales	Alteromonadaceae	Idiomarina	Idiomarina loihiensis	Idiomarina loihiensis L2TR
GCA_000008545.1	Bacteria	Thermotogota	Thermotogae	Thermotogales	Thermotogaceae	Thermotoga	Thermotoga maritima	Thermotoga maritima MSB8
GCA_000008665.1	Archaea	Halobacteriota	Archaeoglobi	Archaeoglobales	Archaeoglobaceae	Archaeoglobus	Archaeoglobus fulgidus	Archaeoglobus fulgidus DSM 4304
GCA_000009185.1	Archaea	Halobacteriota	Halobacteria	Halobacteriales	Haloferacaceae	Haloquadratum	Haloquadratum walsbyi	Haloquadratum walsbyi DSM 16790
GCA_000009365.1	Bacteria	Proteobacteria	Gammaproteobacteria	Pseudomonadales	Alcanivoracaceae	Alcanivorax	Alcanivorax borkumensis	Alcanivorax borkumensis SK2
GCA_000009785.1	Bacteria	Firmicutes	Bacilli	Bacillales	Anoxybacillaceae	Geobacillus	Geobacillus thermoleovorans	Geobacillus kaustophilus HTA426
GCA_000010105.1	Bacteria	Actinobacteriota	Actinomycetia	Mycobacteriales	Mycobacteriaceae	Rhodococcus	Rhodococcus erythropolis	Rhodococcus erythropolis PR4
GCA_000010325.1	Bacteria	Campylobacterota	Campylobacteria	Campylobacterales	Nitratiruptoraceae	YY08-10	YY08-10 sp000010325	Nitratiruptor sp. SB155-2
GCA_000010345.1	Bacteria	Campylobacterota	Campylobacteria	Campylobacterales	Sulfurovaceae	Sulfurovum	Sulfurovum sp000010345	Sulfurovum sp. NBC37-1
GCA_000010405.1	Bacteria	Proteobacteria	Gammaproteobacteria	PS1	Thioglobaceae	Vesicomyosocius	Vesicomyosocius okutanii	Candidatus Vesicomyosocius okutanii
GCA_000010985.1	Bacteria	Deferribacterota	Deferribacteres	Deferribacterales	Deferribacteraceae	Deferribacter	Deferribacter desulfuricans	Deferribacter desulfuricans SSM1
GCA_000011125.1	Archaea	Thermoproteota	Thermoproteia	Sulfolobales	Acidilobaceae	Aeropyrum	Aeropyrum pernix	Aeropyrum pernix K1
GCA_000011185.1	Archaea	Thermoplasmatota	Thermoplasmata	Thermoplasmatales	Thermoplasmataceae	Thermoplasma	Thermoplasma volcanium	Thermoplasma volcanium GSS1
GCA_000011245.1	Bacteria	Firmicutes	Bacilli	Bacillales_D	Amphibacillaceae	Oceanobacillus	Oceanobacillus iheyensis	Oceanobacillus iheyensis HTE831
GCA_000011465.1	Bacteria	Cyanobacteria	Cyanobacteriia	PCC-6307	Cyanobiaceae	Prochlorococcus_A	Prochlorococcus_A pastoris	Prochlorococcus marinus subsp. pastoris str. CCMP1986
GCA_000011485.1	Bacteria	Cyanobacteria	Cyanobacteriia	PCC-6307	Cyanobiaceae	Prochlorococcus_C	Prochlorococcus_C marinus_B	Prochlorococcus marinus str. MIT 9313
GCA_000011585.1	Archaea	Methanobacteriota_A	Methanococci	Methanococcales	Methanococcaceae	Methanococcus	Methanococcus maripaludis	Methanococcus maripaludis S2
GCA_000011805.1	Bacteria	Proteobacteria	Gammaproteobacteria	Enterobacterales	Vibrionaceae	Aliivibrio	Aliivibrio fischeri	Aliivibrio fischeri ES114
GCA_000011965.2	Bacteria	Proteobacteria	Alphaproteobacteria	Rhodobacterales	Rhodobacteraceae	Ruegeria_B	Ruegeria_B pomeroyi	Ruegeria pomeroyi DSS-3
GCA_000012325.1	Bacteria	Proteobacteria	Gammaproteobacteria	Enterobacterales	Alteromonadaceae	Colwellia	Colwellia psychrerythraea_A	Colwellia psychrerythraea 34H
GCA_000012345.1	Bacteria	Proteobacteria	Alphaproteobacteria	Pelagibacterales	Pelagibacteraceae	Pelagibacter	Pelagibacter ubique	Candidatus Pelagibacter ubique HTCC1062
GCA_000012465.1	Bacteria	Cyanobacteria	Cyanobacteriia	PCC-6307	Cyanobiaceae	Prochlorococcus_B	Prochlorococcus_B marinus_B	Prochlorococcus marinus str. NATL2A
GCA_000012505.1	Bacteria	Cyanobacteria	Cyanobacteriia	PCC-6307	Cyanobiaceae	Synechococcus_E	Synechococcus_E sp000012505	Synechococcus sp. CC9902
GCA_000012645.1	Bacteria	Cyanobacteria	Cyanobacteriia	PCC-6307	Cyanobiaceae	Prochlorococcus_A	Prochlorococcus_A marinus_L	Prochlorococcus marinus str. MIT 9312
GCA_000012805.1	Bacteria	Proteobacteria	Gammaproteobacteria	Nitrosococcales	Nitrosococcaceae	Nitrosococcus	Nitrosococcus oceani	Nitrosococcus oceani ATCC 19707
GCA_000012885.1	Bacteria	Desulfobacterota	Desulfuromonadia	Desulfuromonadales	Syntrophotaleaceae	Syntrophotalea	Syntrophotalea carbinolica	Syntrophotalea carbinolica DSM 2380
GCA_000012965.1	Bacteria	Campylobacterota	Campylobacteria	Campylobacterales	Sulfurimonadaceae	Sulfurimonas	Sulfurimonas denitrificans	Sulfurimonas denitrificans DSM 1251
GCA_000012985.1	Bacteria	Proteobacteria	Gammaproteobacteria	Pseudomonadales	Oleiphilaceae	Hahella	Hahella chejuensis	Hahella chejuensis KCTC 2396
GCA_000013005.1	Bacteria	Proteobacteria	Alphaproteobacteria	Sphingomonadales	Sphingomonadaceae	Altererythrobacter_D	Altererythrobacter_D litoralis_A	Erythrobacter litoralis HTCC2594
GCA_000013025.1	Bacteria	Proteobacteria	Alphaproteobacteria	Caulobacterales	Hyphomonadaceae	Hyphomonas	Hyphomonas neptunium	Hyphomonas neptunium ATCC 15444
GCA_000013045.1	Bacteria	Bacteroidota	Rhodothermia	Rhodothermales	Salinibacteraceae	Salinibacter	Salinibacter ruber	Salinibacter ruber DSM 13855
GCA_000013565.1	Bacteria	Proteobacteria	Alphaproteobacteria	Rhodobacterales	Rhodobacteraceae	Roseicyclus	Roseicyclus sp000013565	Jannaschia sp. CCS1
GCA_000013605.1	Bacteria	Proteobacteria	Gammaproteobacteria	Burkholderiales	Burkholderiaceae	Rhodoferax	Rhodoferax ferrireducens	Rhodoferax ferrireducens T118 (Albidiferax ferrireducens T118)
GCA_000013665.1	Bacteria	Proteobacteria	Gammaproteobacteria	Pseudomonadales	Cellvibrionaceae	Saccharophagus	Saccharophagus degradans	Saccharophagus degradans 2-40
GCA_000013765.1	Bacteria	Proteobacteria	Gammaproteobacteria	Enterobacterales	Shewanellaceae	Shewanella	Shewanella denitrificans	Shewanella denitrificans OS217
GCA_000013985.1	Bacteria	Proteobacteria	Alphaproteobacteria	Sphingomonadales	Sphingomonadaceae	Sphingopyxis	Sphingopyxis alaskensis	Sphingopyxis alaskensis RB2256
GCA_000014045.1	Bacteria	Proteobacteria	Alphaproteobacteria	Rhodobacterales	Rhodobacteraceae	Roseobacter	Roseobacter denitrificans	Roseobacter denitrificans OCh 114
GCA_000014065.1	Bacteria	Proteobacteria	Alphaproteobacteria	Rhodobacterales	Rhodobacteraceae	Epibacterium	Epibacterium sp000014065	Ruegeria sp. TM1040
GCA_000014225.1	Bacteria	Proteobacteria	Gammaproteobacteria	Enterobacterales	Alteromonadaceae	Paraglaciecola	Paraglaciecola atlantica_A	Pseudoalteromonas atlantica T6c
GCA_000014585.1	Bacteria	Cyanobacteria	Cyanobacteriia	PCC-6307	Cyanobiaceae	Synechococcus_C	Synechococcus_C sp000014585	Synechococcus sp. CC9311
GCA_000014685.1	Bacteria	Proteobacteria	Gammaproteobacteria	Enterobacterales	Shewanellaceae	Shewanella	Shewanella sp000014665	Shewanella sp. MR-4
GCA_000014705.1	Bacteria	Proteobacteria	Gammaproteobacteria	Enterobacterales	Shewanellaceae	Shewanella	Shewanella frigidimarina	Shewanella frigidimarina NCIMB 400
GCA_000014745.1	Bacteria	Proteobacteria	Alphaproteobacteria	Caulobacterales	Maricaulaceae	Maricaulis	Maricaulis maris_A	Maricaulis maris MCS10
GCA_000014865.1	Bacteria	Proteobacteria	Magnetococcia	Magnetococcales	Magnetococcaceae	Magnetococcus	Magnetococcus marinus	Magnetococcus marinus MC-1
GCA_000014885.1	Bacteria	Proteobacteria	Gammaproteobacteria	Enterobacterales	Shewanellaceae	Shewanella	Shewanella piezotolerans	Shewanella piezotolerans WP3
GCA_000015105.1	Bacteria	Proteobacteria	Gammaproteobacteria	PS1	Thioglobaceae	Ruthia	Ruthia magnifica	Candidatus Ruthia magnifica str. Cm (Calyptogena magnifica)
GCA_000015145.1	Archaea	Thermoproteota	Thermoproteia	Sulfolobales	Pyrodictiaceae	Hyperthermus	Hyperthermus butylicus	Hyperthermus butylicus DSM 5456
GCA_000015185.1	Bacteria	Proteobacteria	Gammaproteobacteria	Enterobacterales	Shewanellaceae	Shewanella	Shewanella putrefaciens	Shewanella sp. W3-18-1
GCA_000015245.1	Bacteria	Proteobacteria	Gammaproteobacteria	Enterobacterales	Shewanellaceae	Shewanella	Shewanella amazonensis	Shewanella amazonensis SB2B
GCA_000015285.1	Bacteria	Proteobacteria	Gammaproteobacteria	Enterobacterales	Psychromonadaceae	Psychromonas	Psychromonas ingrahamii	Psychromonas ingrahamii 37
GCA_000015365.1	Bacteria	Proteobacteria	Gammaproteobacteria	Pseudomonadales	Oleiphilaceae	Marinobacter	Marinobacter hydrocarbonoclasticus	Marinobacter nauticus VT8 (Marinobacter aquaeolei VT8)
GCA_000015645.1	Bacteria	Cyanobacteria	Cyanobacteriia	PCC-6307	Cyanobiaceae	Prochlorococcus_A	Prochlorococcus_A marinus_O	Prochlorococcus marinus str. AS9601
GCA_000015665.1	Bacteria	Cyanobacteria	Cyanobacteriia	PCC-6307	Cyanobiaceae	Prochlorococcus_A	Prochlorococcus_A marinus_P	Prochlorococcus marinus str. MIT 9515
GCA_000015685.1	Bacteria	Cyanobacteria	Cyanobacteriia	PCC-6307	Cyanobiaceae	Prochlorococcus_B	Prochlorococcus_B marinus_B	Prochlorococcus marinus str. NATL1A
GCA_000015705.1	Bacteria	Cyanobacteria	Cyanobacteriia	PCC-6307	Cyanobiaceae	Prochlorococcus_C	Prochlorococcus_C marinus_B	Prochlorococcus marinus str. MIT 9303
GCA_000015825.1	Archaea	Halobacteriota	Methanomicrobia	Methanomicrobiales	Methanoculleaceae	Methanoculleus	Methanoculleus marisnigri	Methanoculleus marisnigri JR1
GCA_000015845.1	Bacteria	Proteobacteria	Gammaproteobacteria	Enterobacterales	Shewanellaceae	Shewanella	Shewanella baltica	Shewanella baltica OS155
GCA_000015945.1	Archaea	Thermoproteota	Thermoproteia	Sulfolobales	Desulfurococcaceae	Staphylothermus	Staphylothermus marinus	Staphylothermus marinus F1
GCA_000015965.1	Bacteria	Cyanobacteria	Cyanobacteriia	PCC-6307	Cyanobiaceae	Prochlorococcus_A	Prochlorococcus_A marinus_E	Prochlorococcus marinus str. MIT 9301
GCA_000016065.1	Bacteria	Proteobacteria	Gammaproteobacteria	Enterobacterales	Shewanellaceae	Shewanella	Shewanella loihica	Shewanella loihica PV-4
GCA_000016165.1	Bacteria	Firmicutes_B	Desulfotomaculia	Desulfotomaculales	Desulfotomaculaceae	Desulfotomaculum	Desulfotomaculum reducens	Desulforamulus reducens MI-1
GCA_000016425.1	Bacteria	Actinobacteriota	Actinomycetia	Mycobacteriales	Micromonosporaceae	Micromonospora	Micromonospora tropica	Salinispora tropica CNB-440
GCA_000016905.1	Bacteria	Thermotogota	Thermotogae	Thermotogales	Fervidobacteriaceae	Thermosipho	Thermosipho melanesiensis	Thermosipho melanesiensis BI429
GCA_000017165.1	Archaea	Methanobacteriota_A	Methanococci	Methanococcales	Methanococcaceae	Methanococcus	Methanococcus vannielii	Methanococcus vannielii SB
GCA_000017185.1	Archaea	Methanobacteriota_A	Methanococci	Methanococcales	Methanococcaceae	Methanothermococcus_A	Methanothermococcus_A aeolicus	Methanococcus aeolicus Nankai-3
GCA_000017325.1	Bacteria	Proteobacteria	Gammaproteobacteria	Enterobacterales	Shewanellaceae	Shewanella	Shewanella baltica	Shewanella baltica OS185
GCA_000017705.1	Bacteria	Proteobacteria	Gammaproteobacteria	Enterobacterales	Vibrionaceae	Vibrio	Vibrio campbellii	Vibrio campbellii ATCC BAA-1116
GCA_000017845.1	Bacteria	Cyanobacteria	Cyanobacteriia	Cyanobacteriales	Microcystaceae_A	Crocosphaera	Crocosphaera subtropica	Crocosphaera subtropica ATCC 51142
GCA_000017945.1	Archaea	Thermoproteota	Thermoproteia	Sulfolobales	Ignicoccaceae	Ignicoccus_A	Ignicoccus_A hospitalis	Ignicoccus hospitalis KIN4/I
GCA_000018025.1	Bacteria	Proteobacteria	Gammaproteobacteria	Enterobacterales	Shewanellaceae	Shewanella	Shewanella sediminis	Shewanella sediminis HAW-EB3
GCA_000018065.1	Bacteria	Cyanobacteria	Cyanobacteriia	PCC-6307	Cyanobiaceae	Prochlorococcus_A	Prochlorococcus_A marinus_A	Prochlorococcus marinus str. MIT 9215
GCA_000018105.1	Bacteria	Cyanobacteria	Cyanobacteriia	Thermosynechococcales	Thermosynechococcaceae	Acaryochloris	Acaryochloris marina	Acaryochloris marina MBIC11017
GCA_000018145.1	Bacteria	Proteobacteria	Alphaproteobacteria	Rhodobacterales	Rhodobacteraceae	Dinoroseobacter	Dinoroseobacter shibae	Dinoroseobacter shibae DFL 12 = DSM 16493
GCA_000018285.1	Bacteria	Proteobacteria	Gammaproteobacteria	Enterobacterales	Shewanellaceae	Shewanella	Shewanella pealeana	Shewanella pealeana ATCC 700345
GCA_000018365.1	Archaea	Methanobacteriota_B	Thermococci	Thermococcales	Thermococcaceae	Thermococcus	Thermococcus onnurineus	Thermococcus onnurineus NA1
GCA_000018465.1	Archaea	Thermoproteota	Nitrososphaeria	Nitrososphaerales	Nitrosopumilaceae	Nitrosopumilus	Nitrosopumilus maritimus	Nitrosopumilus maritimus SCM1
GCA_000018585.1	Bacteria	Cyanobacteria	Cyanobacteriia	PCC-6307	Cyanobiaceae	Prochlorococcus_D	Prochlorococcus_D marinus_B	Prochlorococcus marinus str. MIT 9211
GCA_000018765.1	Bacteria	Proteobacteria	Gammaproteobacteria	Enterobacterales	Shewanellaceae	Shewanella	Shewanella baltica	Shewanella baltica OS195
GCA_000018885.1	Bacteria	Actinobacteriota	Actinomycetia	Actinomycetales	Micrococcaceae	Renibacterium	Renibacterium salmoninarum	Renibacterium salmoninarum ATCC 33209
GCA_000018945.1	Bacteria	Thermotogota	Thermotogae	Thermotogales	Thermotogaceae	Thermotoga	Thermotoga neapolitana	Thermotoga neapolitana DSM 4359
GCA_000019185.1	Bacteria	Proteobacteria	Gammaproteobacteria	Enterobacterales	Shewanellaceae	Shewanella	Shewanella halifaxensis	Shewanella halifaxensis HAW-EB4
GCA_000019485.1	Bacteria	Cyanobacteria	Cyanobacteriia	Cyanobacteriales	Cyanobacteriaceae	Limnothrix	Limnothrix sp001693275	Synechococcus sp. PCC 7002
GCA_000019525.1	Bacteria	Proteobacteria	Gammaproteobacteria	Enterobacterales	Shewanellaceae	Shewanella	Shewanella woodyi	Shewanella woodyi ATCC 51908
GCA_000019625.1	Bacteria	Thermotogota	Thermotogae	Thermotogales	Thermotogaceae	Thermotoga	Thermotoga maritima	Thermotoga sp. RQ2
GCA_000020365.1	Bacteria	Desulfobacterota	Desulfobacteria	Desulfobacterales	Desulfobacteraceae	Desulfobacterium_B	Desulfobacterium_B autotrophicum	Desulforapulum autotrophicum HRM2
GCA_000020525.1	Bacteria	Bacteroidota	Chlorobia	Chlorobiales	Chloroherpetonaceae	Chloroherpeton	Chloroherpeton thalassium	Chloroherpeton thalassium ATCC 35110
GCA_000020585.3	Bacteria	Proteobacteria	Gammaproteobacteria	Enterobacterales	Alteromonadaceae	Alteromonas	Alteromonas mediterranea	Alteromonas mediterranea DE
GCA_000020845.1	Bacteria	Proteobacteria	Gammaproteobacteria	Enterobacterales	Vibrionaceae	Aliivibrio	Aliivibrio fischeri	Aliivibrio fischeri MJ11
GCA_000020865.1	Bacteria	Proteobacteria	Gammaproteobacteria	Enterobacterales	Enterobacteriaceae	Edwardsiella	Edwardsiella piscicida	Edwardsiella tarda EIB202
GCA_000021565.1	Bacteria	Aquificota	Aquificae	Hydrogenothermales	Hydrogenothermaceae	Persephonella	Persephonella marina	Persephonella marina EX-H1
GCA_000021665.1	Bacteria	Proteobacteria	Gammaproteobacteria	Enterobacterales	Shewanellaceae	Shewanella	Shewanella baltica	Shewanella baltica OS223
GCA_000021725.1	Bacteria	Campylobacterota	Campylobacteria	Nautiliales	Nautiliaceae	Nautilia	Nautilia profundicola	Nautilia profundicola AmH
GCA_000022365.1	Archaea	Methanobacteriota_B	Thermococci	Thermococcales	Thermococcaceae	Thermococcus	Thermococcus gammatolerans	Thermococcus gammatolerans EJ3
GCA_000023025.1	Bacteria	Proteobacteria	Gammaproteobacteria	Pseudomonadales	Cellvibrionaceae	Teredinibacter	Teredinibacter turnerae_B	Teredinibacter turnerae T7901
GCA_000023325.1	Bacteria	Thermotogota	Thermotogae	Petrotogales	Kosmotogaceae	Kosmotoga	Kosmotoga olearia	Kosmotoga olearia TBF 19.5.1
GCA_000023445.1	Bacteria	Desulfobacterota_I	Desulfovibrionia	Desulfovibrionales	Desulfovibrionaceae	Maridesulfovibrio	Maridesulfovibrio salexigens	Maridesulfovibrio salexigens DSM 2638
GCA_000023465.1	Bacteria	Bacteroidota	Bacteroidia	Flavobacteriales	Flavobacteriaceae	Zunongwangia	Zunongwangia profunda	Zunongwangia profunda SM-A87
GCA_000023785.1	Bacteria	Proteobacteria	Alphaproteobacteria	Caulobacterales	Hyphomonadaceae	Hirschia	Hirschia baltica	Hirschia baltica ATCC 49814
GCA_000023925.1	Bacteria	Actinobacteriota	Actinomycetia	Actinomycetales	Dermatophilaceae	Kytococcus	Kytococcus sedentarius	Kytococcus sedentarius DSM 20547
GCA_000023985.1	Archaea	Methanobacteriota_A	Methanococci	Methanococcales	Methanocaldococcaceae	Methanocaldococcus	Methanocaldococcus fervens	Methanocaldococcus fervens AG86
GCA_000024085.1	Bacteria	Proteobacteria	Gammaproteobacteria	Enterobacterales	Kangiellaceae	Kangiella	Kangiella koreensis	Kangiella koreensis DSM 16069
GCA_000024125.1	Bacteria	Bacteroidota	Bacteroidia	Flavobacteriales	Flavobacteriaceae	Robiginitalea	Robiginitalea biformata	Robiginitalea biformata HTCC2501
GCA_000024465.1	Bacteria	Proteobacteria	Alphaproteobacteria	Puniceispirillales	Puniceispirillaceae	Puniceispirillum	Puniceispirillum marinum	Candidatus Puniceispirillum marinum IMCC1322
GCA_000024625.1	Archaea	Methanobacteriota_A	Methanococci	Methanococcales	Methanocaldococcaceae	Methanocaldococcus	Methanocaldococcus vulcanius	Methanocaldococcus vulcanius M7
GCA_000024725.1	Bacteria	Proteobacteria	Gammaproteobacteria	Nitrosococcales	Nitrosococcaceae	Nitrosococcus	Nitrosococcus halophilus	Nitrosococcus halophilus Nc 4
GCA_000024805.1	Bacteria	Myxococcota	Polyangia	Haliangiales	Haliangiaceae	Haliangium	Haliangium ochraceum	Haliangium ochraceum DSM 14365
GCA_000024825.1	Bacteria	Proteobacteria	Gammaproteobacteria	Enterobacterales	Vibrionaceae	Vibrio	Vibrio diabolicus	Vibrio antiquarius
GCA_000024845.1	Bacteria	Bacteroidota	Rhodothermia	Rhodothermales	Rhodothermaceae	Rhodothermus	Rhodothermus marinus	Rhodothermus marinus DSM 4252
GCA_000025125.1	Bacteria	Cyanobacteria	Cyanobacteriia	Cyanobacteriales	Microcystaceae_A	Atelocyanobacterium	Atelocyanobacterium thalassa	Candidatus Atelocyanobacterium thalassa isolate ALOHA
GCA_000025285.1	Archaea	Halobacteriota	Archaeoglobi	Archaeoglobales	Archaeoglobaceae	Archaeoglobus_B	Archaeoglobus_B profundus	Archaeoglobus profundus DSM 5631
GCA_000025505.1	Archaea	Halobacteriota	Archaeoglobi	Archaeoglobales	Archaeoglobaceae	Ferroglobus	Ferroglobus placidus	Ferroglobus placidus DSM 10642
GCA_000025525.1	Archaea	Methanobacteriota_A	Methanococci	Methanococcales	Methanocaldococcaceae	Methanocaldococcus	Methanocaldococcus sp000025525	Methanocaldococcus sp. FS406-22
GCA_000025665.1	Archaea	Thermoplasmatota	Thermoplasmata	Aciduliprofundales	Aciduliprofundaceae	Aciduliprofundum	Aciduliprofundum boonei	Aciduliprofundum boonei T469
GCA_000025725.1	Bacteria	Deferribacterota	Deferribacteres	Deferribacterales	Denitrovibrionaceae	Denitrovibrio	Denitrovibrio acetiphilus	Denitrovibrio acetiphilus DSM 12809
GCA_000025905.1	Bacteria	Verrucomicrobiota	Verrucomicrobiae	Opitutales	DSM-45221	Coraliomargarita	Coraliomargarita akajimensis	Coraliomargarita akajimensis DSM 45221
GCA_000025945.1	Bacteria	Desulfobacterota	Desulfobulbia	Desulfobulbales	Desulfocapsaceae	Desulfotalea	Desulfotalea psychrophila	Desulfotalea psychrophila LSv54
GCA_000026085.1	Bacteria	Proteobacteria	Gammaproteobacteria	Enterobacterales	Alteromonadaceae	Pseudoalteromonas	Pseudoalteromonas nigrifaciens	Pseudoalteromonas translucida
GCA_000055785.1	Bacteria	Proteobacteria	Gammaproteobacteria	Pseudomonadales	Halomonadaceae	Chromohalobacter	Chromohalobacter israelensis	Chromohalobacter salexigens DSM 3043
GCA_000060345.1	Bacteria	Bacteroidota	Bacteroidia	Flavobacteriales	Flavobacteriaceae	Gramella	Gramella forsetii	Gramella forsetii KT0803
GCA_000063505.1	Bacteria	Cyanobacteria	Cyanobacteriia	PCC-6307	Cyanobiaceae	Synechococcus_C	Synechococcus_C sp000063505	Synechococcus sp. WH 7803
GCA_000063525.1	Bacteria	Cyanobacteria	Cyanobacteriia	PCC-6307	Cyanobiaceae	RCC307	RCC307 sp000063525	Synechococcus sp. RCC307
GCA_000090405.1	Bacteria	Bacteroidetes		Bacteroidetes Order II. Incertae sedis	Rhodothermaceae	Salinibacter	Salinibacter ruber	Salinibacter ruber M8
GCA_000091325.1	Bacteria	Proteobacteria	Gammaproteobacteria	Enterobacterales	Shewanellaceae	Shewanella	Shewanella violacea	Shewanella violacea DSS12
GCA_000091665.1	Archaea	Methanobacteriota_A	Methanococci	Methanococcales	Methanocaldococcaceae	Methanocaldococcus	Methanocaldococcus jannaschii	Methanocaldococcus jannaschii DSM 2661
GCA_000092305.1	Archaea	Methanobacteriota_A	Methanococci	Methanococcales	Methanocaldococcaceae	Methanocaldococcus_A	Methanocaldococcus_A infernus	Methanocaldococcus infernus ME
GCA_000092465.1	Archaea	Thermoproteota	Thermoproteia	Sulfolobales	Desulfurococcaceae	Staphylothermus	Staphylothermus hellenicus	Staphylothermus hellenicus DSM 12710
GCA_000143085.1	Bacteria	Proteobacteria	Gammaproteobacteria	Nitrosococcales	Nitrosococcaceae	Nitrosococcus	Nitrosococcus watsonii	Nitrosococcus watsonii C-113
GCA_000144645.1	Bacteria	Firmicutes_A	Thermosediminibacteria	Thermosediminibacterales	Thermosediminibacteraceae	Thermosediminibacter	Thermosediminibacter oceani	Thermosediminibacter oceani DSM 16646
GCA_000147355.1	Bacteria	Campylobacterota	Campylobacteria	Campylobacterales	Sulfurimonadaceae	Sulfurimonas	Sulfurimonas autotrophica	Sulfurimonas autotrophica DSM 16294
GCA_000147735.3	Bacteria	Proteobacteria	Gammaproteobacteria	Alteromonadales	Shewanellaceae	Shewanella	Shewanella baltica	Shewanella baltica BA175
GCA_000147875.1	Archaea	Halobacteriota	Methanomicrobia	Methanomicrobiales	Methanomicrobiaceae	Methanolacinia	Methanolacinia petrolearia	Methanolacinia petrolearia DSM 11571
GCA_000148645.1	Bacteria	Proteobacteria	Gammaproteobacteria	Enterobacterales	Shewanellaceae	Ferrimonas	Ferrimonas balearica	Ferrimonas balearica DSM 9799
GCA_000151105.2	Archaea	Methanobacteriota_B	Thermococci	Thermococcales	Thermococcaceae	Thermococcus_B	Thermococcus_B barophilus	Thermococcus barophilus MP
GCA_000151205.2	Archaea	Methanobacteriota_B	Thermococci	Thermococcales	Thermococcaceae	Thermococcus	Thermococcus sp000151205	Thermococcus sp. AM4
GCA_000152825.2	Bacteria	Proteobacteria	Alphaproteobacteria	Caulobacterales	Parvularculaceae	Parvularcula	Parvularcula bermudensis	Parvularcula bermudensis HTCC2503
GCA_000152925.3	Bacteria	Bacteroidetes	Flavobacteriia	Flavobacteriales	Flavobacteriaceae	Dokdonia		Dokdonia sp. MED134
GCA_000152945.2	Bacteria	Bacteroidota	Bacteroidia	Flavobacteriales	Flavobacteriaceae	Polaribacter	Polaribacter sp000152945	Polaribacter sp. MED152
GCA_000153165.2	Bacteria	Bacteroidota	Bacteroidia	Flavobacteriales	Flavobacteriaceae	Maribacter_A	Maribacter_A sp000153165	Maribacter sp. HTCC2170
GCA_000153405.2	Bacteria	Proteobacteria	Gammaproteobacteria	Enterobacterales	Psychromonadaceae	Psychromonas	Psychromonas sp000153405	Psychromonas sp. CNPT3
GCA_000153485.2	Bacteria	Bacteroidota	Bacteroidia	Flavobacteriales	Flavobacteriaceae	Psychroflexus	Psychroflexus torquis	Psychroflexus torquis ATCC 700755
GCA_000154745.2	Bacteria	Proteobacteria	Alphaproteobacteria	Rhodobacterales	Rhodobacteraceae	Phaeobacter	Phaeobacter inhibens	Phaeobacter inhibens 2.10
GCA_000154785.2	Bacteria	Proteobacteria	Alphaproteobacteria	Rhodobacterales	Rhodobacteraceae	Roseobacter	Roseobacter litoralis	Roseobacter litoralis Och 149
GCA_000155675.2	Bacteria	Proteobacteria	Alphaproteobacteria	Rhodobacterales	Rhodobacteraceae	Octadecabacter	Octadecabacter antarcticus	Octadecabacter antarcticus 307
GCA_000155735.2	Bacteria	Proteobacteria	Alphaproteobacteria	Rhodobacterales	Rhodobacteraceae	Octadecabacter	Octadecabacter arcticus	Octadecabacter arcticus 238
GCA_000161795.2	Bacteria	Cyanobacteria	Cyanobacteriia	PCC-6307	Cyanobiaceae	Synechococcus_E	Synechococcus_E sp000161795	Synechococcus sp. WH 8109
GCA_000165505.1	Bacteria	Fusobacteriota	Fusobacteriia	Fusobacteriales	Fusobacteriaceae	Ilyobacter	Ilyobacter polytropus	Ilyobacter polytropus DSM 2926
GCA_000166295.1	Bacteria	Proteobacteria	Gammaproteobacteria	Pseudomonadales	Oleiphilaceae	Marinobacter	Marinobacter adhaerens	Marinobacter adhaerens HP15
GCA_000172635.2	Bacteria	Proteobacteria	Gammaproteobacteria	Enterobacterales	Alteromonadaceae	Alteromonas	Alteromonas macleodii	Alteromonas macleodii ATCC 27126
GCA_000172995.2	Archaea	Halobacteriota	Halobacteria	Halobacteriales	Haloferacaceae	Halogeometricum	Halogeometricum borinquense	Halogeometricum borinquense DSM 11551
GCA_000178875.2	Bacteria	Proteobacteria	Gammaproteobacteria	Enterobacterales	Shewanellaceae	Shewanella	Shewanella baltica	Shewanella baltica OS678
GCA_000179575.2	Archaea	Methanobacteriota_A	Methanococci	Methanococcales	Methanococcaceae	Methanothermococcus_A	Methanothermococcus_A okinawensis	Methanothermococcus okinawensis IH1
GCA_000183425.1	Bacteria	Bacteroidota	Bacteroidia	Cytophagales	Cyclobacteriaceae	Marivirga	Marivirga tractuosa	Marivirga tractuosa DSM 4126
GCA_000183745.1	Bacteria	Deinococcota	Deinococci	Deinococcales	Marinithermaceae	Oceanithermus	Oceanithermus profundus	Oceanithermus profundus DSM 14977
GCA_000184065.1	Bacteria	Proteobacteria	Gammaproteobacteria	Enterobacterales	Alteromonadaceae	Pseudoalteromonas	Pseudoalteromonas tetraodonis	Pseudoalteromonas sp. SM9913
GCA_000184325.1	Bacteria	Proteobacteria	Gammaproteobacteria	Enterobacterales	Vibrionaceae	Vibrio	Vibrio furnissii	Vibrio furnissii NCTC 11218
GCA_000184345.2	Bacteria	Spirochaetes	Spirochaetia	Spirochaetales	Spirochaetaceae	Spirochaeta	Spirochaeta thermophila	Spirochaeta thermophila DSM 6578
GCA_000184705.1	Bacteria	Firmicutes_E	Thermaerobacteria	Thermaerobacterales	Thermaerobacteraceae	Thermaerobacter	Thermaerobacter marianensis	Thermaerobacter marianensis DSM 12885
GCA_000185805.1	Bacteria	Aquificota	Desulfurobacteriia	Desulfurobacteriales	Desulfurobacteriaceae	Thermovibrio	Thermovibrio ammonificans	Thermovibrio ammonificans HB-1
GCA_000186245.1	Bacteria	Campylobacterota	Campylobacteria	Campylobacterales	Sulfurovaceae	Nitratifractor	Nitratifractor salsuginis	Nitratifractor salsuginis DSM 16511
GCA_000186265.1	Bacteria	Bacteroidota	Bacteroidia	Flavobacteriales	Flavobacteriaceae	Cellulophaga	Cellulophaga algicola	Cellulophaga algicola DSM 14237
GCA_000189295.2	Bacteria	Desulfobacterota_I	Desulfovibrionia	Desulfovibrionales	Desulfovibrionaceae	Pseudodesulfovibrio	Pseudodesulfovibrio mercurii	Pseudodesulfovibrio mercurii
GCA_000190595.1	Bacteria	Bacteroidota	Bacteroidia	Flavobacteriales	Flavobacteriaceae	Cellulophaga	Cellulophaga lytica	Cellulophaga lytica DSM 7489
GCA_000191045.1	Bacteria	Aquificota	Desulfurobacteriia	Desulfurobacteriales	Desulfurobacteriaceae	Desulfurobacterium	Desulfurobacterium thermolithotrophum	Desulfurobacterium thermolithotrophum DSM 11699
GCA_000192865.1	Bacteria	Proteobacteria	Gammaproteobacteria	Pseudomonadales	Marinomonadaceae	Marinomonas	Marinomonas mediterranea	Marinomonas mediterranea MMB-1
GCA_000194135.1	Bacteria	Campylobacterota	Desulfurellia	Desulfurellales	Hippeaceae	Hippea	Hippea maritima	Hippea maritima DSM 10411
GCA_000194625.1	Archaea	Halobacteriota	Archaeoglobi	Archaeoglobales	Archaeoglobaceae	Archaeoglobus_C	Archaeoglobus_C veneficus	Archaeoglobus veneficus SNP6
GCA_000195085.1	Bacteria	Proteobacteria	Alphaproteobacteria	Pelagibacterales	Pelagibacteraceae	IMCC9063	IMCC9063 sp000195085	Candidatus Pelagibacter sp. IMCC9063
GCA_000195335.1	Bacteria	Deinococcota	Deinococci	Deinococcales	Marinithermaceae	Marinithermus	Marinithermus hydrothermalis	Marinithermus hydrothermalis DSM 14884
GCA_000195575.1	Bacteria	Firmicutes	Bacilli	Lactobacillales	Carnobacteriaceae	Carnobacterium_A	Carnobacterium_A sp000195575	Carnobacterium sp. 17-4
GCA_000195935.2	Archaea	Methanobacteriota_B	Thermococci	Thermococcales	Thermococcaceae	Pyrococcus	Pyrococcus abyssi	Pyrococcus abyssi GE5
GCA_000195975.1	Bacteria	Cyanobacteria	Cyanobacteriia	PCC-6307	Cyanobiaceae	Synechococcus_E	Synechococcus_E sp000195975	Parasynechococcus marenigrum WH 8102
GCA_000196255.1	Bacteria	Proteobacteria	Gammaproteobacteria	Enterobacterales	Vibrionaceae	Photobacterium	Photobacterium profundum_A	Photobacterium profundum SS9
GCA_000196315.1	Bacteria	Bacteroidota	Bacteroidia	Flavobacteriales	Flavobacteriaceae	Croceibacter	Croceibacter atlanticus	Croceibacter atlanticus HTCC2559
GCA_000196395.1	Bacteria	Proteobacteria	Gammaproteobacteria	Enterobacterales	Aeromonadaceae	Aeromonas	Aeromonas salmonicida	Aeromonas salmonicida subsp. salmonicida A449
GCA_000196495.1	Bacteria	Proteobacteria	Gammaproteobacteria	Enterobacterales	Vibrionaceae	Aliivibrio	Aliivibrio salmonicida_A	Aliivibrio salmonicida LFI1238
GCA_000196655.1	Archaea	Halobacteriota	Methanosarcinia	Methanosarcinales	Methanosarcinaceae	Methanohalobium	Methanohalobium evestigatum	Methanohalobium evestigatum Z-7303
GCA_000196875.2	Bacteria	Proteobacteria	Gammaproteobacteria	Pseudomonadales	Halomonadaceae	Halomonas	Halomonas elongata	Halomonas elongata DSM 2581
GCA_000200715.1	Archaea	Thermoproteota	Nitrososphaeria	Nitrososphaerales	Nitrosopumilaceae	Cenarchaeum	Cenarchaeum symbiosum	Cenarchaeum symbiosum A
GCA_000203935.1	Bacteria	Proteobacteria	Gammaproteobacteria	Enterobacterales	Shewanellaceae	Shewanella	Shewanella sp000203935	Shewanella sp. ANA-3
GCA_000204155.1	Bacteria	Actinobacteriota	Actinomycetia	Mycobacteriales	Micromonosporaceae	Micromonospora	Micromonospora gifhornensis	Micromonospora maris AB-18-032
GCA_000204585.1	Archaea	Thermoproteota	Nitrososphaeria	Nitrososphaerales	Nitrosopumilaceae	Nitrosarchaeum	Nitrosarchaeum limnae	Candidatus Nitrosarchaeum limnium SFB1
GCA_000209655.1	Bacteria	Proteobacteria	Gammaproteobacteria	Burkholderiales	Burkholderiaceae	Pusillimonas_C	Pusillimonas_C sp000209655	Pusillimonas sp. T7-7
GCA_000210915.2	Bacteria	Bdellovibrionota	Bacteriovoracia	Bacteriovoracales	Bacteriovoracaceae	Halobacteriovorax	Halobacteriovorax marinus	Halobacteriovorax marinus SJ
GCA_000211475.1	Archaea	Methanobacteriota_B	Thermococci	Thermococcales	Thermococcaceae	Pyrococcus	Pyrococcus sp000211475	Pyrococcus sp. NA2
GCA_000211855.3	Bacteria	Bacteroidetes	Flavobacteriia	Flavobacteriales	Flavobacteriaceae	Lacinutrix		Lacinutrix sp. 5H-3-7-4
GCA_000212335.1	Bacteria	Proteobacteria	Gammaproteobacteria	Enterobacterales	Alteromonadaceae	Paraglaciecola	Paraglaciecola chathamensis	Glaciecola sp. 4H-3-7+YE-5
GCA_000212355.1	Bacteria	Bacteroidota	Bacteroidia	Flavobacteriales	Flavobacteriaceae	Dokdonia	Dokdonia sp000212355	Dokdonia sp. 4H-3-7-5
GCA_000212675.2	Bacteria	Desulfobacterota_I	Desulfovibrionia	Desulfovibrionales	Desulfovibrionaceae	Desulfocurvibacter	Desulfocurvibacter africanus	Desulfocurvibacter africanus subsp. africanus str. Walvis Bay
GCA_000213655.1	Bacteria	Proteobacteria	Gammaproteobacteria	Enterobacterales	Alteromonadaceae	Alteromonas	Alteromonas naphthalenivorans	Alteromonas naphthalenivorans
GCA_000213825.1	Bacteria	Firmicutes	Bacilli	Lactobacillales	Streptococcaceae	Streptococcus	Streptococcus parauberis	Streptococcus parauberis KCTC 11537
GCA_000214215.1	Bacteria	Proteobacteria	Gammaproteobacteria	Pseudomonadales	Marinomonadaceae	Marinomonas	Marinomonas posidonica	Marinomonas posidonica IVIA-Po-181
GCA_000214415.1	Archaea	Methanobacteriota_A	Methanococci	Methanococcales	Methanococcaceae	Methanotorris	Methanotorris igneus	Methanotorris igneus Kol 5
GCA_000214665.1	Bacteria	Proteobacteria	Gammaproteobacteria	Methylococcales	Methylomonadaceae	Methylomonas	Methylomonas methanica_B	Methylomonas methanica MC09
GCA_000215895.1	Bacteria	Proteobacteria	Gammaproteobacteria	Enterobacterales	Shewanellaceae	Shewanella	Shewanella baltica	Shewanella baltica OS117
GCA_000215995.1	Archaea	Methanobacteriota_B	Thermococci	Thermococcales	Thermococcaceae	Pyrococcus	Pyrococcus yayanosii	Pyrococcus yayanosii CH1
GCA_000217675.1	Bacteria	Proteobacteria	Gammaproteobacteria	Enterobacterales	Vibrionaceae	Vibrio	Vibrio anguillarum	Vibrio anguillarum 775
GCA_000217795.1	Bacteria	Desulfobacterota	Thermodesulfobacteria	Thermodesulfobacteriales	Thermodesulfatatoraceae	Thermodesulfatator	Thermodesulfatator indicus	Thermodesulfatator indicus DSM 15286
GCA_000218625.1	Bacteria	Deferribacterota	Deferribacteres	Deferribacterales	Flexistipitaceae	Flexistipes	Flexistipes sinusarabici	Flexistipes sinusarabici DSM 4947
GCA_000218705.1	Bacteria	Cyanobacteria	Cyanobacteriia	PCC-6307	Cyanobiaceae	Prochlorococcus_A	Prochlorococcus_A marinus_Q	Prochlorococcus marinus bv. HNLC1 (marine metagenome)
GCA_000218745.1	Bacteria	Cyanobacteria	Cyanobacteriia	PCC-6307	Cyanobiaceae	Prochlorococcus_A	Prochlorococcus_A marinus_T	Prochlorococcus marinus bv. HNLC2 (marine metagenome)
GCA_000219105.1	Bacteria	Myxococcota	Myxococcia	Myxococcales	Myxococcaceae	Myxococcus	Myxococcus macrosporus	Corallococcus macrosporus
GCA_000219855.1	Bacteria	Firmicutes_E	Sulfobacillia	Sulfobacillales	Sulfobacillaceae	Sulfobacillus_A	Sulfobacillus_A acidophilus	Sulfobacillus acidophilus TPY
GCA_000220645.1	Archaea	Methanobacteriota_A	Methanococci	Methanococcales	Methanococcaceae	Methanococcus	Methanococcus maripaludis	Methanococcus maripaludis X1
GCA_000221005.1	Bacteria	Proteobacteria	Alphaproteobacteria	Rhizobiales_A	Rhizobiaceae_A	Brucella	Brucella melitensis	Brucella pinnipedialis B2/94
GCA_000221185.1	Archaea	Methanobacteriota_B	Thermococci	Thermococcales	Thermococcaceae	Thermococcus	Thermococcus sp000221185	Thermococcus sp. 4557
GCA_000222485.1	Bacteria	Bacteroidota	Bacteroidia	Cytophagales	Cyclobacteriaceae	Cyclobacterium	Cyclobacterium marinum	Cyclobacterium marinum DSM 745
GCA_000223395.1	Archaea	Thermoproteota	Thermoproteia	Sulfolobales	Pyrodictiaceae	Pyrolobus	Pyrolobus fumarii	Pyrolobus fumarii 1A
GCA_000223905.1	Archaea	Halobacteriota	Halobacteria	Halobacteriales	Haloarculaceae	Haloarcula	Haloarcula hispanica	Haloarcula hispanica ATCC 33960
GCA_000224085.1	Bacteria	Bacteroidota	Bacteroidia	Flavobacteriales	Flavobacteriaceae	Muricauda	Muricauda ruestringensis	Muricauda ruestringensis DSM 13258
GCA_000224745.1	Bacteria	Bacteroidota	Rhodothermia	Rhodothermales	Rhodothermaceae	Rhodothermus	Rhodothermus marinus	Rhodothermus marinus SG0.5JP17-172
GCA_000226565.1	Bacteria	Proteobacteria	Gammaproteobacteria	Enterobacterales	Alteromonadaceae	Glaciecola	Glaciecola nitratireducens	Glaciecola nitratireducens FR1064
GCA_000227745.3	Bacteria	Proteobacteria	Gammaproteobacteria	Chromatiales	Chromatiaceae	Thiocystis	Thiocystis violascens	Thiocystis violascens DSM 198
GCA_000230555.1	Bacteria	Proteobacteria	Alphaproteobacteria	Rhizobiales	Devosiaceae	Pelagibacterium	Pelagibacterium halotolerans	Pelagibacterium halotolerans B2
GCA_000230655.3	Bacteria	Thermotogae	Thermotogae	Thermotogales	Thermotogaceae	Thermotoga	Thermotoga maritima	Thermotoga maritima MSB8
GCA_000230895.3	Bacteria	Actinobacteria	Actinomycetia	Corynebacteriales	Mycobacteriaceae	Mycolicibacterium	Mycolicibacterium rhodesiae	Mycolicibacterium rhodesiae NBB3
GCA_000233775.1	Bacteria	Synergistota	Synergistia	Synergistales	Thermovirgaceae	Thermovirga	Thermovirga lienii	Thermovirga lienii DSM 17291
GCA_000236645.1	Bacteria	Proteobacteria	Alphaproteobacteria	Rhizobiales	Stappiaceae	Pseudovibrio	Pseudovibrio denitrificans	Pseudovibrio sp. FO-BEG1
GCA_000236705.1	Bacteria	Bacteroidota	Bacteroidia	Flavobacteriales	Schleiferiaceae	Owenweeksia	Owenweeksia hongkongensis	Owenweeksia hongkongensis DSM 17368
GCA_000237865.1	Archaea	Halobacteriota	Halobacteria	Halobacteriales	Haloferacaceae	Haloquadratum	Haloquadratum walsbyi	Haloquadratum walsbyi C23
GCA_000241385.1	Bacteria	Proteobacteria	Gammaproteobacteria	Enterobacterales	Vibrionaceae	Vibrio	Vibrio natriegens	Vibrio sp. EJY3
GCA_000246735.1	Archaea	Thermoplasmatota	Poseidoniia	Poseidoniales	Poseidoniaceae	MGIIa-L1	MGIIa-L1 sp000246735	uncultured Candidatus Poseidoniales archaeon (marine metagenome)
GCA_000246985.3	Archaea	Euryarchaeota	Thermococci	Thermococcales	Thermococcaceae	Thermococcus	Thermococcus litoralis	Thermococcus litoralis DSM 5473
GCA_000250635.1	Bacteria	Bacteroidota	Bacteroidia	Chitinophagales	Saprospiraceae	Saprospira	Saprospira grandis_B	Saprospira grandis str. Lewin
GCA_000253255.1	Bacteria	Proteobacteria	Alphaproteobacteria	Sphingomonadales	Sphingomonadaceae	Novosphingobium	Novosphingobium pentaromativorans	Novosphingobium sp. PP1Y
GCA_000255135.1	Bacteria	Thermotogota	Thermotogae	Petrotogales	Petrotogaceae	Marinitoga	Marinitoga piezophila	Marinitoga piezophila KA3
GCA_000259255.1	Bacteria	Campylobacterota	Campylobacteria	Campylobacterales	Helicobacteraceae	Helicobacter	Helicobacter cetorum_B	Helicobacter cetorum MIT 00-7128
GCA_000259275.1	Bacteria	Campylobacterota	Campylobacteria	Campylobacterales	Helicobacteraceae	Helicobacter	Helicobacter cetorum	Helicobacter cetorum MIT 99-5656
GCA_000263735.1	Archaea	Methanobacteriota_B	Thermococci	Thermococcales	Thermococcaceae	Pyrococcus	Pyrococcus sp000263735	Pyrococcus sp. ST04
GCA_000264455.2	Bacteria	Proteobacteria	Alphaproteobacteria	Tistrellales	Tistrellaceae	Tistrella	Tistrella mobilis	Tistrella mobilis KA081020-065
GCA_000264765.2	Bacteria	Proteobacteria	Gammaproteobacteria	Enterobacterales	Enterobacteriaceae	Edwardsiella	Edwardsiella anguillarum	Edwardsiella anguillarum ET080813
GCA_000265405.1	Bacteria	Bacteroidota	Bacteroidia	Cytophagales	Cyclobacteriaceae	Belliella	Belliella baltica	Belliella baltica DSM 15883
GCA_000265505.1	Bacteria	Bacteroidota	Bacteroidia	Cytophagales	Bernardetiaceae	Bernardetia	Bernardetia litoralis	Bernardetia litoralis DSM 6794
GCA_000265525.1	Archaea	Methanobacteriota_B	Thermococci	Thermococcales	Thermococcaceae	Thermococcus	Thermococcus cleftensis	Thermococcus cleftensis
GCA_000266905.1	Bacteria	Actinobacteriota	Actinomycetia	Mycobacteriales	Mycobacteriaceae	Mycobacterium	Mycobacterium chubuense_A	Mycolicibacterium chubuense NBB4
GCA_000267545.1	Bacteria	Proteobacteria	Gammaproteobacteria	Pseudomonadales	Pseudomonadaceae	Pseudomonas_A	Pseudomonas_A stutzeri_U	Pseudomonas stutzeri CCUG 29243
GCA_000269925.1	Bacteria	Firmicutes	Bacilli	Lactobacillales	Streptococcaceae	Lactococcus	Lactococcus garvieae	Lactococcus garvieae ATCC 49156
GCA_000269945.1	Bacteria	Firmicutes	Bacilli	Lactobacillales	Streptococcaceae	Lactococcus	Lactococcus garvieae	Lactococcus garvieae Lg2
GCA_000283275.1	Bacteria	Proteobacteria	Gammaproteobacteria	Pseudomonadales	Oleiphilaceae	Marinobacter	Marinobacter psychrophilus	Marinobacter sp. BSs20148
GCA_000283575.1	Bacteria	Firmicutes_A	Clostridia	Oscillospirales	Oscillospiraceae	Oscillibacter	Oscillibacter valericigenes	Oscillibacter valericigenes Sjm18-20
GCA_000284115.1	Bacteria	Planctomycetota	Phycisphaerae	Phycisphaerales	Phycisphaeraceae	Phycisphaera	Phycisphaera mikurensis	Phycisphaera mikurensis NBRC 102666
GCA_000284615.1	Bacteria	Proteobacteria	Gammaproteobacteria	Pseudomonadales	Oleiphilaceae	Marinobacter	Marinobacter hydrocarbonoclasticus	Marinobacter nauticus ATCC 49840 (Marinobacter hydrocarbonoclasticus
GCA_000299095.1	Bacteria	Proteobacteria	Alphaproteobacteria	Pelagibacterales	Pelagibacteraceae	Pelagibacter	Pelagibacter sp000299095	alpha proteobacterium HIMB5
GCA_000299115.1	Bacteria	Proteobacteria	Alphaproteobacteria	HIMB59	HIMB59	HIMB59	HIMB59 sp000299115	alpha proteobacterium HIMB59
GCA_000299335.2	Bacteria	Proteobacteria	Gammaproteobacteria	Pseudomonadales	Alcanivoracaceae	Alcanivorax_A	Alcanivorax_A pacificus	Alcanivorax pacificus W11-5
GCA_000299365.1	Archaea	Thermoproteota	Nitrososphaeria	Nitrososphaerales	Nitrosopumilaceae	Nitrosopumilus	Nitrosopumilus koreensis	Candidatus Nitrosopumilus koreensis AR1
GCA_000299395.1	Archaea	Thermoproteota	Nitrososphaeria	Nitrososphaerales	Nitrosopumilaceae	Nitrosopumilus	Nitrosopumilus sediminis	Candidatus Nitrosopumilus sediminis
GCA_000299955.1	Bacteria	Proteobacteria	Gammaproteobacteria	Enterobacterales	Alteromonadaceae	Alteromonas	Alteromonas macleodii	Alteromonas macleodii str. 'English Channel 673'
GCA_000299965.1	Bacteria	Proteobacteria	Gammaproteobacteria	Methylococcales	Cycloclasticaceae	Cycloclasticus	Cycloclasticus pugetii	Cycloclasticus sp. P1
GCA_000299995.1	Bacteria	Proteobacteria	Gammaproteobacteria	Enterobacterales	Alteromonadaceae	Alteromonas	Alteromonas abrolhosensis	Alteromonas macleodii str. 'Black Sea 11'
GCA_000300005.1	Bacteria	Proteobacteria	Gammaproteobacteria	Pseudomonadales	Alcanivoracaceae	Alcanivorax	Alcanivorax dieselolei	Alcanivorax dieselolei B5
GCA_000300175.1	Bacteria	Proteobacteria	Gammaproteobacteria	Enterobacterales	Alteromonadaceae	Alteromonas	Alteromonas macleodii	Alteromonas macleodii str. 'Balearic Sea AD45'
GCA_000305785.2	Bacteria	Proteobacteria	Gammaproteobacteria	Pseudomonadales	Cellvibrionaceae	Simiduia	Simiduia agarivorans	Simiduia agarivorans SA1 = DSM 21679
GCA_000306765.2	Archaea	Halobacteriota	Halobacteria	Halobacteriales	Haloferacaceae	Haloferax	Haloferax mediterranei	Haloferax mediterranei ATCC 33500
GCA_000307105.1	Bacteria	Desulfobacterota	Desulfobacteria	Desulfobacterales	Desulfobacteraceae	Desulfobacula	Desulfobacula toluolica	Desulfobacula toluolica Tol2
GCA_000308235.2	Bacteria	Proteobacteria	Gammaproteobacteria	Pseudomonadales	Moraxellaceae	Acinetobacter	Acinetobacter venetianus	Acinetobacter venetianus VE-C3
GCA_000310085.1	Bacteria	Proteobacteria	Gammaproteobacteria	Enterobacterales	Alteromonadaceae	Alteromonas	Alteromonas mediterranea	Alteromonas mediterranea DE1
GCA_000316665.1	Bacteria	Cyanobacteria	Cyanobacteriia	Cyanobacteriales	Nostocaceae	Rivularia	Rivularia sp000316665	Rivularia sp. PCC 7116 (Nunduva sp. PCC 7116)
GCA_000317065.1	Bacteria	Cyanobacteria	Cyanobacteriia	Pseudanabaenales	Pseudanabaenaceae	PCC-7367	PCC-7367 sp000317065	Pseudanabaena sp. PCC 7367
GCA_000319385.1	Bacteria	Proteobacteria	Alphaproteobacteria	Thalassobaculales	Thalassobaculaceae	Endolissoclinum	Endolissoclinum faulkneri	Candidatus Endolissoclinum faulkneri L2
GCA_000319575.2	Bacteria	Proteobacteria	Gammaproteobacteria	Nitrococcales	Nitrococcaceae	Spiribacter	Spiribacter salinus	Spiribacter salinus M19-40
GCA_000325705.1	Bacteria	Bacteroidota	Bacteroidia	Cytophagales	Cyclobacteriaceae	Echinicola	Echinicola vietnamensis	Echinicola vietnamensis DSM 17526
GCA_000327045.1	Bacteria	Proteobacteria	Gammaproteobacteria	Chromatiales	Chromatiaceae	Thioflavicoccus	Thioflavicoccus mobilis	Thioflavicoccus mobilis 8321
GCA_000328405.1	Bacteria	Proteobacteria	Gammaproteobacteria	Enterobacterales	Vibrionaceae	Vibrio	Vibrio parahaemolyticus	Vibrio parahaemolyticus BB22OP
GCA_000331025.1	Bacteria	Desulfobacterota_I	Desulfovibrionia	Desulfovibrionales	Desulfovibrionaceae	Maridesulfovibrio	Maridesulfovibrio hydrothermalis	Maridesulfovibrio hydrothermalis AM13 = DSM 14728
GCA_000331105.1	Bacteria	Bacteroidota	Bacteroidia	Cytophagales	Spirosomaceae	Fibrella	Fibrella aestuarina	Fibrella aestuarina BUZ 2
GCA_000332115.1	Bacteria	Bacteroidota	Bacteroidia	Flavobacteriales	Flavobacteriaceae	Nonlabens	Nonlabens dokdonensis	Nonlabens dokdonensis DSW-6
GCA_000340565.3	Bacteria	Cyanobacteria		Nostocales	Aphanizomenonaceae	Nodularia	Nodularia spumigena	Nodularia spumigena CCY9414
GCA_000341395.1	Bacteria	Desulfobacterota	Desulfobulbia	Desulfobulbales	Desulfocapsaceae	Desulfocapsa	Desulfocapsa sulfexigens	Desulfocapsa sulfexigens DSM 10523
GCA_000341895.1	Bacteria	Desulfobacterota_I	Desulfovibrionia	Desulfovibrionales	Desulfovibrionaceae	Pseudodesulfovibrio	Pseudodesulfovibrio piezophilus	Pseudodesulfovibrio piezophilus C1TLV30
GCA_000347635.1	Bacteria	Proteobacteria	Gammaproteobacteria	Enterobacterales	Alteromonadaceae	Paraglaciecola	Paraglaciecola psychrophila	Paraglaciecola psychrophila 170
GCA_000348785.1	Bacteria	Actinobacteriota	Acidimicrobiia	Acidimicrobiales	Ilumatobacteraceae	Ilumatobacter_A	Ilumatobacter_A coccineus	Ilumatobacter coccineus YM16-304
GCA_000355675.1	Bacteria	Proteobacteria	Gammaproteobacteria	Pseudomonadales	DSM-6294	Thalassolituus	Thalassolituus oleivorans	Thalassolituus oleivorans MIL-1
GCA_000355805.1	Bacteria	Bacteroidota	Bacteroidia	Flavobacteriales	Flavobacteriaceae	Dokdonia	Dokdonia sp000355805	Dokdonia sp. PRO95
GCA_000390265.1	Bacteria	Thermotogota	Thermotogae	Thermotogales	Thermotogaceae	Thermotoga	Thermotoga maritima	Thermotoga maritima MSB8
GCA_000403625.1	Bacteria	Firmicutes	Bacilli	Lactobacillales	Streptococcaceae	Streptococcus	Streptococcus iniae	Streptococcus iniae SF1
GCA_000418305.1	Bacteria	Proteobacteria	Gammaproteobacteria	Pseudomonadales	Moraxellaceae	Psychrobacter	Psychrobacter cryohalolentis	Psychrobacter sp. G
GCA_000439475.1	Bacteria	Proteobacteria	Gammaproteobacteria	Enterobacterales	Alteromonadaceae	Alteromonas	Alteromonas mediterranea	Alteromonas mediterranea 615
GCA_000439495.1	Bacteria	Proteobacteria	Gammaproteobacteria	Enterobacterales	Alteromonadaceae	Alteromonas	Alteromonas mediterranea	Alteromonas mediterranea MED64
GCA_000439515.1	Bacteria	Proteobacteria	Gammaproteobacteria	Enterobacterales	Alteromonadaceae	Alteromonas	Alteromonas mediterranea	Alteromonas mediterranea U4
GCA_000439535.1	Bacteria	Proteobacteria	Gammaproteobacteria	Enterobacterales	Alteromonadaceae	Alteromonas	Alteromonas mediterranea	Alteromonas mediterranea U7
GCA_000439555.1	Bacteria	Proteobacteria	Gammaproteobacteria	Enterobacterales	Alteromonadaceae	Alteromonas	Alteromonas mediterranea	Alteromonas mediterranea U8
GCA_000439575.1	Bacteria	Proteobacteria	Gammaproteobacteria	Enterobacterales	Alteromonadaceae	Alteromonas	Alteromonas mediterranea	Alteromonas mediterranea UM7
GCA_000439595.1	Bacteria	Proteobacteria	Gammaproteobacteria	Enterobacterales	Alteromonadaceae	Alteromonas	Alteromonas mediterranea	Alteromonas mediterranea UM4b
GCA_000442595.1	Bacteria	Proteobacteria	Gammaproteobacteria	Methylococcales	Cycloclasticaceae	Cycloclasticus	Cycloclasticus pugetii	Cycloclasticus zancles 78-ME
GCA_000442645.1	Bacteria	Actinobacteriota	Actinomycetia	Mycobacteriales	Mycobacteriaceae	Corynebacterium	Corynebacterium maris	Corynebacterium maris DSM 45190
GCA_000462975.1	Bacteria	Proteobacteria	Gammaproteobacteria	Enterobacterales	Vibrionaceae	Vibrio	Vibrio anguillarum	Vibrio anguillarum M3
GCA_000468615.2	Bacteria	Bacteroidota	Bacteroidia	Flavobacteriales	Flavobacteriaceae	Cellulophaga	Cellulophaga baltica	Cellulophaga baltica 18
GCA_000470655.1	Archaea	Halobacteriota	Halobacteria	Halobacteriales	Haloarculaceae	Halorhabdus	Halorhabdus tiamatea	Halorhabdus tiamatea SARL4B
GCA_000473245.1	Bacteria	Firmicutes	Bacilli	Bacillales_B	DSM-18226	Bacillus_AB	Bacillus_AB infantis	Bacillus infantis NRRL B-14911
GCA_000477035.2	Bacteria	Bacteroidota	Bacteroidia	Flavobacteriales	Flavobacteriaceae	Cellulophaga	Cellulophaga baltica	Cellulophaga baltica NN016038
GCA_000485905.1	Bacteria	Proteobacteria	Gammaproteobacteria	Nitrococcales	Nitrococcaceae	Spiribacter	Spiribacter curvatus	Spiribacter curvatus
GCA_000495635.1	Bacteria	Actinobacteriota	Actinomycetia	Streptomycetales	Streptomycetaceae	Streptomyces	Streptomyces albidoflavus	Streptomyces sp. GBA 94-10
GCA_000495755.1	Bacteria	Actinobacteriota	Actinomycetia	Streptomycetales	Streptomycetaceae	Streptomyces	Streptomyces albidoflavus	Streptomyces sp. PVA_94-07
GCA_000503895.1	Bacteria	Proteobacteria	Alphaproteobacteria	Rhizobiales	Hyphomicrobiaceae	Hyphomicrobium	Hyphomicrobium nitrativorans	Hyphomicrobium nitrativorans NL23
GCA_000507245.1	Bacteria	Spirochaetota	Spirochaetia	DSM-27196	Salinispiraceae	Salinispira	Salinispira pacifica	Salinispira pacifica
GCA_000510265.1	Bacteria	Proteobacteria	Alphaproteobacteria	Thalassobaculales	Thalassobaculaceae	Endolissoclinum	Endolissoclinum faulkneri_A	Candidatus Endolissoclinum faulkneri L5
GCA_000511355.1	Bacteria	Proteobacteria	Alphaproteobacteria	Rhodobacterales	Rhodobacteraceae	Leisingera	Leisingera methylohalidivorans	Leisingera methylohalidivorans DSM 14336
GCA_000511385.1	Bacteria	Proteobacteria	Alphaproteobacteria	Rhodobacterales	Rhodobacteraceae	Phaeobacter	Phaeobacter gallaeciensis	Phaeobacter gallaeciensis DSM 26640
GCA_000517445.1	Archaea	Methanobacteriota_B	Thermococci	Thermococcales	Thermococcaceae	Thermococcus_B	Thermococcus_B paralvinellae	Thermococcus paralvinellae
GCA_000520135.2	Bacteria	Proteobacteria	Alphaproteobacteria	Rhodobacterales	Rhodobacteraceae	Rhodovulum	Rhodovulum sulfidophilum	Rhodovulum sulfidophilum DSM 1374
GCA_000568495.1	Bacteria	Proteobacteria	Gammaproteobacteria	Enterobacterales	Vibrionaceae	Vibrio	Vibrio parahaemolyticus	Vibrio parahaemolyticus UCM-V493
GCA_000582555.1	Bacteria	Proteobacteria	Gammaproteobacteria	Pseudomonadales	DSM-6294	Thalassolituus	Thalassolituus oleivorans	Thalassolituus oleivorans R6-15
GCA_000585495.1	Archaea	Methanobacteriota_B	Thermococci	Thermococcales	Thermococcaceae	Thermococcus	Thermococcus nautili	Thermococcus nautili
GCA_000590795.1	Bacteria	Proteobacteria	Alphaproteobacteria	Rhizobiales_A	Rhizobiaceae_A	Brucella	Brucella melitensis	Brucella ceti TE10759-12
GCA_000590815.1	Bacteria	Proteobacteria	Alphaproteobacteria	Rhizobiales_A	Rhizobiaceae_A	Brucella	Brucella melitensis	Brucella ceti TE28753-12
GCA_000590925.1	Bacteria	Proteobacteria	Alphaproteobacteria	Rhodobacterales	Rhodobacteraceae	Roseicyclus	Roseicyclus elongatus	Roseibacterium elongatum DSM 19469
GCA_000591035.1	Archaea	Thermoproteota	Thermoproteia	Sulfolobales	Acidilobaceae	Aeropyrum	Aeropyrum camini	Aeropyrum camini SY1 = JCM 12091
GCA_000626635.1	Bacteria	Bacteroidota	Bacteroidia	Bacteroidales	Prolixibacteraceae	Draconibacterium	Draconibacterium orientale	Draconibacterium orientale
GCA_000632985.1	Bacteria	Proteobacteria	Alphaproteobacteria	Rickettsiales	Anaplasmataceae	Neorickettsia	Neorickettsia helminthoeca	Neorickettsia helminthoeca str. Oregon
GCA_000661915.1	Bacteria	Proteobacteria	Gammaproteobacteria	Pseudomonadales	Pseudomonadaceae	Pseudomonas_A	Pseudomonas_A stutzeri_A	Pseudomonas stutzeri
GCA_000691605.1	Bacteria	Bdellovibrionota	Bdellovibrionia	Bdellovibrionales	Bdellovibrionaceae	Bdellovibrio	Bdellovibrio bacteriovorus	Bdellovibrio bacteriovorus
GCA_000723205.1	Bacteria	Bacteroidota	Bacteroidia	Flavobacteriales	Flavobacteriaceae	Formosa	Formosa agariphila	Formosa agariphila KMM 3901
GCA_000725425.1	Archaea	Methanobacteriota_B	Thermococci	Thermococcales	Thermococcaceae	Palaeococcus	Palaeococcus pacificus	Palaeococcus pacificus DY20341
GCA_000730385.1	Bacteria	Proteobacteria	Gammaproteobacteria	Enterobacterales	Alteromonadaceae	Alteromonas	Alteromonas australica	Alteromonas australica
GCA_000732905.1	Bacteria	Firmicutes	Bacilli	Lactobacillales	Lactobacillaceae	Weissella	Weissella ceti_A	Weissella ceti
GCA_000734035.1	Archaea	Halobacteriota	Archaeoglobi	Archaeoglobales	Archaeoglobaceae	Archaeoglobus	Archaeoglobus fulgidus	Archaeoglobus fulgidus DSM 8774
GCA_000737535.1	Bacteria	Cyanobacteria	Cyanobacteriia	PCC-6307	Cyanobiaceae	Synechococcus_E	Synechococcus_E sp000737535	Synechococcus sp. KORDI-100
GCA_000737575.1	Bacteria	Cyanobacteria	Cyanobacteriia	PCC-6307	Cyanobiaceae	Synechococcus_E	Synechococcus_E sp000737575	Synechococcus sp. KORDI-49
GCA_000737595.1	Bacteria	Cyanobacteria	Cyanobacteriia	PCC-6307	Cyanobiaceae	Synechococcus_E	Synechococcus_E sp000737595	Synechococcus sp. KORDI-52
GCA_000738435.1	Bacteria	Proteobacteria	Alphaproteobacteria	Rhodobacterales	Rhodobacteraceae	Planktomarina	Planktomarina temperata	Planktomarina temperata RCA23
GCA_000739065.1	Archaea	Methanobacteriota_A	Methanococci	Methanococcales	Methanocaldococcaceae	Methanocaldococcus	Methanocaldococcus bathoardescens	Methanocaldococcus bathoardescens
GCA_000739395.1	Bacteria	Bacteroidota	Bacteroidia	Flavobacteriales	Flavobacteriaceae	Flavobacterium	Flavobacterium psychrophilum	Flavobacterium psychrophilum
GCA_000746665.1	Bacteria	Proteobacteria	Gammaproteobacteria	Enterobacterales	Vibrionaceae	Vibrio	Vibrio vulnificus	Vibrio vulnificus
GCA_000750195.1	Bacteria	Bacteroidota	Bacteroidia	Flavobacteriales	Flavobacteriaceae	Cellulophaga	Cellulophaga lytica	Cellulophaga lytica
GCA_000750515.1	Bacteria	Firmicutes	Bacilli	Lactobacillales	Lactobacillaceae	Weissella	Weissella ceti_A	Weissella ceti
GCA_000750535.1	Bacteria	Firmicutes	Bacilli	Lactobacillales	Lactobacillaceae	Weissella	Weissella ceti_A	Weissella ceti
GCA_000754365.1	Bacteria	Bacteroidota	Bacteroidia	Flavobacteriales	Flavobacteriaceae	Flavobacterium	Flavobacterium psychrophilum	Flavobacterium psychrophilum FPG101
GCA_000754405.1	Bacteria	Bacteroidota	Bacteroidia	Flavobacteriales	Flavobacteriaceae	Flavobacterium	Flavobacterium psychrophilum	Flavobacterium psychrophilum FPG3
GCA_000755705.1	Bacteria	Firmicutes	Bacilli	Izemoplasmatales	Izemoplasmataceae	Izemoplasma_B	Izemoplasma_B sp000755705	Candidatus Izimaplasma sp. HR1
GCA_000756615.1	Bacteria	Firmicutes	Bacilli	Paenibacillales	Paenibacillaceae	Paenibacillus	Paenibacillus durus	Paenibacillus durus (Paenibacillus azotofixans)
GCA_000757845.1	Bacteria	Cyanobacteria	Cyanobacteriia	PCC-6307	Cyanobiaceae	Prochlorococcus_A	Prochlorococcus_A sp000757845	Prochlorococcus sp. MIT 0604
GCA_000757865.1	Bacteria	Cyanobacteria	Cyanobacteriia	PCC-6307	Cyanobiaceae	Prochlorococcus_B	Prochlorococcus_B sp000757865	Prochlorococcus sp. MIT 0801
GCA_000763535.2	Bacteria	Proteobacteria	Gammaproteobacteria	Vibrionales	Vibrionaceae	Vibrio	Vibrio coralliilyticus	Vibrio coralliilyticus
GCA_000764555.1	Bacteria	Proteobacteria	Gammaproteobacteria	Francisellales	Francisellaceae	Francisella	Francisella sp000764555	Francisella sp. FSC1006
GCA_000767465.1	Bacteria	Proteobacteria	Alphaproteobacteria	Sphingomonadales	Sphingomonadaceae	Novosphingobium	Novosphingobium pentaromativorans	Novosphingobium pentaromativorans US6-1
GCA_000769655.1	Archaea	Methanobacteriota_B	Thermococci	Thermococcales	Thermococcaceae	Thermococcus	Thermococcus eurythermalis	Thermococcus eurythermalis
GCA_000770115.2	Bacteria	Proteobacteria	Gammaproteobacteria	Vibrionales	Vibrionaceae	Vibrio	Vibrio harveyi	Vibrio harveyi
GCA_000772065.1	Bacteria	Proteobacteria	Gammaproteobacteria	Enterobacterales	Vibrionaceae	Vibrio	Vibrio coralliilyticus	Vibrio coralliilyticus
GCA_000772105.1	Bacteria	Proteobacteria	Gammaproteobacteria	Enterobacterales	Vibrionaceae	Vibrio	Vibrio tubiashii	Vibrio tubiashii ATCC 19109
GCA_000785535.1	Bacteria	Actinobacteriota	Actinomycetia	Actinomycetales	Micrococcaceae	Specibacter	Specibacter sp000785535	Arthrobacter sp. PAMC 25486
GCA_000786425.1	Bacteria	Proteobacteria	Gammaproteobacteria	Enterobacterales	Vibrionaceae	Vibrio	Vibrio anguillarum	Vibrio anguillarum (Listonella anguillarum)
GCA_000788395.1	Bacteria	Proteobacteria	Gammaproteobacteria	Enterobacterales	Alteromonadaceae	Pseudoalteromonas	Pseudoalteromonas piratica	Pseudoalteromonas piratica
GCA_000789255.1	Archaea	Halobacteriota	Archaeoglobi	Archaeoglobales	Archaeoglobaceae	Geoglobus	Geoglobus acetivorans	Geoglobus acetivorans
GCA_000789335.1	Bacteria	Thermotogota	Thermotogae	Thermotogales	Thermotogaceae	Thermotoga	Thermotoga maritima	Thermotoga sp. 2812B
GCA_000789355.1	Bacteria	Firmicutes_A	Clostridia	Clostridiales	Clostridiaceae	Clostridium	Clostridium cagae	Clostridium botulinum 202F
GCA_000789375.1	Bacteria	Thermotogota	Thermotogae	Thermotogales	Thermotogaceae	Thermotoga	Thermotoga petrophila	Thermotoga sp. Cell2
GCA_000801275.1	Bacteria	Proteobacteria	Gammaproteobacteria	Vibrionales	Vibrionaceae	Vibrio	Vibrio nigripulchritudo	Vibrio nigripulchritudo
GCA_000801295.1	Bacteria	Proteobacteria	Gammaproteobacteria	Chromatiales	Sedimenticolaceae	MONJU	MONJU sp000801295	endosymbiont of unidentified scaly snail isolate Monju
GCA_000812185.1	Archaea	Thermoproteota	Nitrososphaeria	Nitrososphaerales	Nitrosopumilaceae	Nitrosopelagicus	Nitrosopelagicus brevis	Candidatus Nitrosopelagicus brevis
GCA_000815145.1	Bacteria	Firmicutes	Bacilli	Bacillales	Bacillaceae	Bacillus	Bacillus velezensis	Bacillus sp. Pc3
GCA_000816785.1	Bacteria	Campylobacterota	Campylobacteria	Campylobacterales	Campylobacteraceae	Campylobacter_D	Campylobacter_D peloridis	Campylobacter peloridis LMG 23910
GCA_000818095.1	Bacteria	Firmicutes	Bacilli	Bacillales_B	Jeotgalibacillaceae	Jeotgalibacillus	Jeotgalibacillus malaysiensis	Jeotgalibacillus malaysiensis
GCA_000819565.1	Bacteria	Proteobacteria	Alphaproteobacteria	Rhodobacterales	Rhodobacteraceae	Celeribacter	Celeribacter indicus	Celeribacter indicus
GCA_000827835.1	Archaea	Halobacteriota	Halobacteria	Halobacteriales	Haloarculaceae	Haloarcula	Haloarcula hispanica	Haloarcula sp. CBA1115
GCA_000828475.1	Bacteria	Proteobacteria	Alphaproteobacteria	Rhizobiales	Methyloligellaceae	Methyloceanibacter	Methyloceanibacter caenitepidi	Methyloceanibacter caenitepidi
GCA_000828615.1	Bacteria	Proteobacteria	Gammaproteobacteria	Chromatiales	Sedimenticolaceae	Thiolapillus	Thiolapillus brandeum	Thiolapillus brandeum
GCA_000828715.1	Bacteria	Bacteroidota	Bacteroidia	Flavobacteriales	Flavobacteriaceae	Winogradskyella	Winogradskyella sp000828715	Winogradskyella sp. PG-2
GCA_000830985.1	Bacteria	Proteobacteria	Gammaproteobacteria	Pseudomonadales	Oleiphilaceae	Marinobacter	Marinobacter similis	Marinobacter similis
GCA_000831005.1	Bacteria	Proteobacteria	Gammaproteobacteria	Pseudomonadales	Oleiphilaceae	Marinobacter	Marinobacter salarius	Marinobacter salarius
GCA_000831185.1	Bacteria	Bacteroidota	Bacteroidia	Flavobacteriales	Flavobacteriaceae	Flavobacterium	Flavobacterium psychrophilum	Flavobacterium psychrophilum
GCA_000831205.1	Bacteria	Bacteroidota	Bacteroidia	Flavobacteriales	Flavobacteriaceae	Flavobacterium	Flavobacterium psychrophilum	Flavobacterium psychrophilum
GCA_000831225.1	Bacteria	Bacteroidota	Bacteroidia	Flavobacteriales	Flavobacteriaceae	Flavobacterium	Flavobacterium psychrophilum	Flavobacterium psychrophilum
GCA_000831385.1	Bacteria	Bacteroidota	Bacteroidia	Flavobacteriales	Flavobacteriaceae	Nonlabens	Nonlabens marinus	Nonlabens marinus S1-08
GCA_000831485.1	Bacteria	Firmicutes	Bacilli	Lactobacillales	Streptococcaceae	Streptococcus	Streptococcus iniae	Streptococcus iniae
GCA_000832145.1	Bacteria	Thermotogota	Thermotogae	Thermotogales	Thermotogaceae	Thermotoga	Thermotoga neapolitana	Thermotoga sp. RQ7
GCA_000833025.1	Bacteria	Bacteroidota	Bacteroidia	Flavobacteriales	Flavobacteriaceae	Flavobacterium	Flavobacterium profundi	Myroides profundi
GCA_000834255.1	Bacteria	Proteobacteria	Gammaproteobacteria	Enterobacterales	Enterobacteriaceae	Yersinia	Yersinia ruckeri	Yersinia ruckeri
GCA_000834395.1	Bacteria	Proteobacteria	Gammaproteobacteria	Enterobacterales	Enterobacteriaceae	Yersinia	Yersinia aldovae	Yersinia aldovae 670-83
GCA_000835165.1	Bacteria	Actinobacteriota	Actinomycetia	Mycobacteriales	Mycobacteriaceae	Corynebacterium	Corynebacterium marinum	Corynebacterium marinum DSM 44953
GCA_000875775.1	Archaea	Thermoproteota	Nitrososphaeria	Nitrososphaerales	Nitrosopumilaceae	Nitrosopumilus	Nitrosopumilus piranensis	Nitrosopumilus piranensis
GCA_000934525.1	Bacteria	Proteobacteria	Gammaproteobacteria	Enterobacterales	Alteromonadaceae	Alteromonas	Alteromonas australica	Alteromonas australica
GCA_000940995.1	Bacteria	Proteobacteria	Gammaproteobacteria	Enterobacterales	Vibrionaceae	Photobacterium	Photobacterium gaetbulicola	Photobacterium gaetbulicola Gung47
GCA_000941055.1	Bacteria	Bacteroidota	Bacteroidia	Flavobacteriales	Flavobacteriaceae	Siansivirga	Siansivirga zeaxanthinifaciens	Siansivirga zeaxanthinifaciens CC-SAMT-1
GCA_000953695.1	Bacteria	Proteobacteria	Gammaproteobacteria	Enterobacterales	Vibrionaceae	Aliivibrio	Aliivibrio wodanis	Aliivibrio wodanis
GCA_000953735.1	Bacteria	Proteobacteria	Gammaproteobacteria	Enterobacterales	Moritellaceae	Moritella	Moritella viscosa	Moritella viscosa
GCA_000954115.1	Bacteria	Actinobacteriota	Actinomycetia	Mycobacteriales	Mycobacteriaceae	Rhodococcus_B	Rhodococcus_B sp000954115	Rhodococcus sp. B7740
GCA_000956175.1	Archaea	Thermoproteota	Nitrososphaeria	Nitrososphaerales	Nitrosopumilaceae	Nitrosopumilus	Nitrosopumilus adriaticus	Nitrosopumilus adriaticus
GCA_000963865.1	Bacteria	Bacteroidota	Bacteroidia	Flavobacteriales	Flavobacteriaceae	Muricauda_A	Muricauda_A lutaonensis	Muricauda lutaonensis
GCA_000964565.1	Bacteria	Proteobacteria	Gammaproteobacteria	Enterobacterales	Enterobacteriaceae	Yersinia	Yersinia ruckeri	Yersinia ruckeri
GCA_000967895.1	Bacteria	Proteobacteria	Gammaproteobacteria	Pseudomonadales	DSM-6294	Oleispira	Oleispira antarctica	Oleispira antarctica RB-8
GCA_000968135.1	Bacteria	Proteobacteria	Alphaproteobacteria	Rhodospirillales	Magnetospiraceae	Magnetospira	Magnetospira sp000968135	Magnetospira sp. QH-2
GCA_000970005.1	Archaea	Halobacteriota	Methanosarcinia	Methanosarcinales	Methanosarcinaceae	Methanosarcina	Methanosarcina sp000969965	Methanosarcina sp. WH1
GCA_000970045.1	Archaea	Halobacteriota	Methanosarcinia	Methanosarcinales	Methanosarcinaceae	MTP4	MTP4 sp000970045	Methanosarcina sp. MTP4
GCA_000970085.1	Archaea	Halobacteriota	Methanosarcinia	Methanosarcinales	Methanosarcinaceae	Methanosarcina	Methanosarcina siciliae	Methanosarcina siciliae T4/M
GCA_000970125.1	Archaea	Halobacteriota	Methanosarcinia	Methanosarcinales	Methanosarcinaceae	Methanosarcina	Methanosarcina siciliae	Methanosarcina siciliae HI350
GCA_000970145.1	Archaea	Halobacteriota	Methanosarcinia	Methanosarcinales	Methanosarcinaceae	Methanosarcina	Methanosarcina siciliae	Methanosarcina siciliae C2J
GCA_000970325.1	Archaea	Halobacteriota	Methanosarcinia	Methanosarcinales	Methanosarcinaceae	Methanococcoides	Methanococcoides methylutens_A	Methanococcoides methylutens MM1
GCA_000971605.2	Bacteria	Bacteroidota	Bacteroidia	Flavobacteriales	Flavobacteriaceae	Flavobacterium	Flavobacterium psychrophilum	Flavobacterium psychrophilum
GCA_000971645.2	Bacteria	Bacteroidota	Bacteroidia	Flavobacteriales	Flavobacteriaceae	Flavobacterium	Flavobacterium psychrophilum	Flavobacterium psychrophilum
GCA_000971685.2	Bacteria	Bacteroidota	Bacteroidia	Flavobacteriales	Flavobacteriaceae	Flavobacterium	Flavobacterium psychrophilum	Flavobacterium psychrophilum
GCA_000978535.1	Bacteria	Thermotogota	Thermotogae	Thermotogales	Thermotogaceae	Thermotoga	Thermotoga maritima	Thermotoga maritima
GCA_000978555.1	Bacteria	Thermotogota	Thermotogae	Thermotogales	Thermotogaceae	Thermotoga	Thermotoga maritima	Thermotoga maritima MSB8
GCA_000978575.1	Bacteria	Thermotogota	Thermotogae	Thermotogales	Thermotogaceae	Thermotoga	Thermotoga maritima	Thermotoga maritima
GCA_000981565.1	Bacteria	Proteobacteria	Alphaproteobacteria	Rhizobiales	Hyphomicrobiaceae	Filomicrobium	Filomicrobium insigne	Candidatus Filomicrobium marinum
GCA_000981765.1	Bacteria	Proteobacteria	Gammaproteobacteria	Enterobacterales	Kangiellaceae	Kangiella	Kangiella geojedonensis	Kangiella geojedonensis
GCA_000982975.1	Bacteria	Proteobacteria	Gammaproteobacteria	Pseudomonadales	Halomonadaceae	Halomonas	Halomonas titanicae	Halomonas sp. A3H3
GCA_001006045.1	Archaea	Halobacteriota	Archaeoglobi	Archaeoglobales	Archaeoglobaceae	Geoglobus	Geoglobus ahangari	Geoglobus ahangari
GCA_001007875.1	Bacteria	Proteobacteria	Gammaproteobacteria	Chromatiales	Sedimenticolaceae	Sedimenticola	Sedimenticola thiotaurini	Sedimenticola thiotaurini
GCA_001008165.2	Bacteria	Proteobacteria	Alphaproteobacteria	Sphingomonadales	Sphingomonadaceae	Croceibacterium	Croceibacterium atlanticum	Croceibacterium atlanticum
GCA_001010805.1	Bacteria	Proteobacteria	Gammaproteobacteria	Pseudomonadales	Spongiibacteraceae	IMCC21906	IMCC21906 sp001010805	Spongiibacter sp. IMCC21906
GCA_001011035.1	Bacteria	Actinobacteriota	Actinomycetia	Streptomycetales	Streptomycetaceae	Streptomyces	Streptomyces sp002847285	Streptomyces sp. CNQ-509
GCA_001011155.1	Bacteria	Proteobacteria	Alphaproteobacteria	Rhizobiales	Rhizobiaceae	Hoeflea	Hoeflea sp001011155	Hoeflea sp. IMCC20628
GCA_001017575.1	Bacteria	Campylobacterota	Campylobacteria	Campylobacterales	Campylobacteraceae	Campylobacter_D	Campylobacter_D lari_C	Campylobacter lari
GCA_001017655.1	Bacteria	Verrucomicrobiota	Kiritimatiellae	Kiritimatiellales	Kiritimatiellaceae	Kiritimatiella	Kiritimatiella glycovorans	Kiritimatiella glycovorans
GCA_001027025.1	Bacteria	Thermotogota	Thermotogae	Petrotogales	Kosmotogaceae	Kosmotoga_B	Kosmotoga_B pacifica	Kosmotoga pacifica
GCA_001028085.1	Bacteria	Firmicutes	Bacilli	Bacillales	Anoxybacillaceae	Geobacillus	Geobacillus thermophilus	Geobacillus sp. 12AMOR1
GCA_001028625.1	Bacteria	Proteobacteria	Alphaproteobacteria	Sphingomonadales	Sphingomonadaceae	Pelagerythrobacter	Pelagerythrobacter marensis	Pelagerythrobacter marensis
GCA_001028705.1	Bacteria	Proteobacteria	Alphaproteobacteria	Sphingomonadales	Sphingomonadaceae	Croceicoccus	Croceicoccus naphthovorans	Croceicoccus naphthovorans
GCA_001040845.1	Bacteria	Cyanobacteria	Cyanobacteriia	PCC-6307	Cyanobiaceae	Synechococcus_C	Synechococcus_C sp001040845	Synechococcus sp. WH 8020
GCA_001043175.1	Bacteria	Proteobacteria	Gammaproteobacteria	Pseudomonadales	Oleiphilaceae	Marinobacter	Marinobacter psychrophilus	Marinobacter psychrophilus
GCA_001044335.1	Bacteria	Proteobacteria	Gammaproteobacteria	Burkholderiales	Methylophilaceae	BACL14	BACL14 sp001044335	Methylophilales bacterium MBRSF5
GCA_001044355.1	Bacteria	Proteobacteria	Gammaproteobacteria	Burkholderiales	Methylophilaceae	BACL14	BACL14 sp001044335	Methylophilales bacterium MBRS-H7
GCA_001044375.1	Bacteria	Proteobacteria	Gammaproteobacteria	Burkholderiales	Methylophilaceae	BACL14	BACL14 sp001044335	Methylophilales bacterium MBRSG12
GCA_001046955.1	Bacteria	Proteobacteria	Alphaproteobacteria	Rhodobacterales	Rhodobacteraceae	Marinovum	Marinovum algicola	Marinovum algicola DG 898
GCA_001050135.1	Bacteria	Bacteroidota	Bacteroidia	Cytophagales	Cyclobacteriaceae	Cyclobacterium	Cyclobacterium amurskyense	Cyclobacterium amurskyense
GCA_001077815.2	Bacteria	Proteobacteria	Alphaproteobacteria	Sphingomonadales	Sphingomonadaceae	Alteraurantiacibacter	Alteraurantiacibacter atlanticus	Aurantiacibacter atlanticus
GCA_001182765.1	Bacteria	Cyanobacteria	Cyanobacteriia	PCC-6307	Cyanobiaceae	Synechococcus_E	Synechococcus_E sp000195975	Synechococcus sp. WH 8103
GCA_001187785.1	Bacteria	Proteobacteria	Gammaproteobacteria	Xanthomonadales	Wenzhouxiangellaceae	Wenzhouxiangella	Wenzhouxiangella marina	Wenzhouxiangella marina
GCA_001187845.1	Bacteria	Proteobacteria	Alphaproteobacteria	Rhodobacterales	Rhodobacteraceae	Octadecabacter	Octadecabacter temperatus	Octadecabacter temperatus
GCA_001190965.1	Archaea	Halobacteriota	Halobacteria	Halobacteriales	Haloferacaceae	Haloferax	Haloferax gibbonsii	Haloferax gibbonsii
GCA_001266795.1	Bacteria	Proteobacteria	Gammaproteobacteria	Pseudomonadales	Oleiphilaceae	Marinobacter	Marinobacter flavimaris	Marinobacter sp. CP1
GCA_001281385.1	Bacteria	Proteobacteria	Gammaproteobacteria	PS1	Thioglobaceae	Pseudothioglobus	Pseudothioglobus singularis	Candidatus Pseudothioglobus singularis PS1
GCA_001281485.1	Bacteria	Proteobacteria	Alphaproteobacteria	Sphingomonadales	Sphingomonadaceae	Erythrobacter	Erythrobacter epoxidivorans	Altererythrobacter epoxidivorans
GCA_001282785.1	Archaea	Halobacteriota	Halobacteria	Halobacteriales	Haloferacaceae	Halolamina	Halolamina sediminis	Halolamina sediminis
GCA_001293165.1	Bacteria	Proteobacteria	Gammaproteobacteria	PS1	Thioglobaceae	Thioglobus	Thioglobus autotrophicus	Candidatus Thioglobus autotrophicus
GCA_001304795.1	Bacteria	Proteobacteria	Alphaproteobacteria	Sphingomonadales	Sphingomonadaceae	Alteriqipengyuania	Alteriqipengyuania bathyomarina	Citromicrobium sp. JL477
GCA_001305615.1	Bacteria	Proteobacteria	Alphaproteobacteria	Rhodobacterales	Rhodobacteraceae	Actibacterium_A	Actibacterium_A naphthalenivorans	Actibacterium sp. EMB200-NS6
GCA_001305655.1	Archaea	Halobacteriota	Halobacteria	Halobacteriales	Halobacteriaceae	Halanaeroarchaeum	Halanaeroarchaeum sulfurireducens	Halanaeroarchaeum sulfurireducens
GCA_001308265.1	Bacteria	Proteobacteria	Alphaproteobacteria	Rhodobacterales	Rhodobacteraceae	Celeribacter_A	Celeribacter_A marinus	Celeribacter marinus
GCA_001310225.1	Bacteria	Bacteroidota	Bacteroidia	Flavobacteriales	Flavobacteriaceae	Algibacter_A	Algibacter_A alginicilyticus	Algibacter alginicilyticus
GCA_001412615.1	Archaea	Thermoproteota	Thermoproteia	Sulfolobales	Pyrodictiaceae	Pyrodictium	Pyrodictium delaneyi	Pyrodictium delaneyi
GCA_001420915.1	Bacteria	Proteobacteria	Gammaproteobacteria	Enterobacterales	Celerinatantimonadaceae	Agarivorans	Agarivorans gilvus	Agarivorans gilvus
GCA_001430825.1	Bacteria	Bacteroidota	Bacteroidia	Flavobacteriales	Flavobacteriaceae	Sediminicola	Sediminicola sp001430825	Sediminicola sp. YIK13
GCA_001430865.1	Bacteria	Bacteroidota	Bacteroidia	Flavobacteriales	Flavobacteriaceae	Nonlabens	Nonlabens tegetincola	Nonlabens sp. MIC269
GCA_001433455.1	Archaea	Methanobacteriota_B	Thermococci	Thermococcales	Thermococcaceae	Thermococcus_B	Thermococcus_B barophilus	Thermococcus barophilus
GCA_001433715.1	Bacteria	Proteobacteria	Gammaproteobacteria	Enterobacterales	Alteromonadaceae	Alteromonas	Alteromonas stellipolaris	Alteromonas stellipolaris LMG 21856
GCA_001435845.1	Bacteria	Proteobacteria	Gammaproteobacteria	Pseudomonadales	Moraxellaceae	Psychrobacter	Psychrobacter sp001435845	Psychrobacter sp. P11G3
GCA_001444365.1	Bacteria	Proteobacteria	Gammaproteobacteria	Enterobacterales	Alteromonadaceae	Colwellia	Colwellia marinimaniae	Colwellia sp. MT41
GCA_001444405.1	Bacteria	Proteobacteria	Gammaproteobacteria	Enterobacterales	Alteromonadaceae	Pseudoalteromonas	Pseudoalteromonas phenolica	Pseudoalteromonas phenolica
GCA_001444425.1	Bacteria	Proteobacteria	Gammaproteobacteria	Pseudomonadales	Pseudohongiellaceae	Pseudohongiella	Pseudohongiella spirulinae	Pseudohongiella spirulinae
GCA_001455325.1	Bacteria	Proteobacteria	Gammaproteobacteria	Enterobacterales	Alteromonadaceae	Pseudoalteromonas	Pseudoalteromonas tetraodonis	Pseudoalteromonas issachenkonii
GCA_001456255.1	Bacteria	Proteobacteria	Gammaproteobacteria	Enterobacterales	Vibrionaceae	Vibrio	Vibrio natriegens	Vibrio natriegens NBRC 15636 = ATCC 14048 = DSM 759
GCA_001460935.1	Bacteria	Proteobacteria	Gammaproteobacteria	Burkholderiales	2013Ark19i	2013Ark19i	2013Ark19i sp001460935	Candidatus Ichthyocystis hellenicum
GCA_001465295.1	Bacteria	Proteobacteria	Gammaproteobacteria	Enterobacterales	Alteromonadaceae	Pseudoalteromonas	Pseudoalteromonas translucida	Pseudoalteromonas translucida KMM 520
GCA_001465835.2	Bacteria	Firmicutes	Bacilli	Bacillales_A	Planococcaceae	Planococcus	Planococcus kocurii	Planococcus kocurii
GCA_001466725.1	Bacteria	Proteobacteria	Gammaproteobacteria	Enterobacterales	Alteromonadaceae	Lacimicrobium	Lacimicrobium alkaliphilum_B	Lacimicrobium alkaliphilum
GCA_001469735.1	Bacteria	Proteobacteria	Gammaproteobacteria	Enterobacterales	Vibrionaceae	Vibrio	Vibrio alginolyticus	Vibrio alginolyticus
GCA_001481685.1	Archaea	Thermoproteota	Thermoproteia	Sulfolobales	Ignicoccaceae	Ignicoccus	Ignicoccus islandicus	Ignicoccus islandicus DSM 13165
GCA_001482385.1	Bacteria	Proteobacteria	Gammaproteobacteria	Enterobacterales	Alteromonadaceae	Pseudoalteromonas	Pseudoalteromonas rubra_B	Pseudoalteromonas rubra
GCA_001483385.1	Bacteria	Bacteroidota	Bacteroidia	Flavobacteriales	Flavobacteriaceae	Tenacibaculum	Tenacibaculum finnmarkense	Tenacibaculum dicentrarchi
GCA_001514395.1	Bacteria	Proteobacteria	Gammaproteobacteria	Piscirickettsiales	Piscirickettsiaceae	Piscirickettsia	Piscirickettsia salmonis	Piscirickettsia salmonis
GCA_001534725.1	Bacteria	Proteobacteria	Gammaproteobacteria	Piscirickettsiales	Piscirickettsiaceae	Piscirickettsia	Piscirickettsia salmonis	Piscirickettsia salmonis
GCA_001543325.1	Bacteria	Bacteroidota	Bacteroidia	Flavobacteriales	Flavobacteriaceae	Lutibacter	Lutibacter profundi	Lutibacter profundi
GCA_001547735.1	Bacteria	Thermosulfidibacterota	Thermosulfidibacteria	Thermosulfidibacterales	Thermosulfidibacteraceae	Thermosulfidibacter	Thermosulfidibacter takaii	Thermosulfidibacter takaii ABI70S6
GCA_001547755.1	Bacteria	Proteobacteria	Gammaproteobacteria	PS1	Thioglobaceae	Thiodubiliella	Thiodubiliella sp001547755	endosymbiont of Bathymodiolus septemdierum str. Myojin knoll
GCA_001561955.1	Bacteria	Firmicutes_A	Clostridia	Lachnospirales	Anaerotignaceae	Anaerotignum	Anaerotignum propionicum	Anaerotignum propionicum DSM 1682
GCA_001586255.1	Bacteria	Proteobacteria	Gammaproteobacteria	Pseudomonadales	Spongiibacteraceae	Zhongshania	Zhongshania aliphaticivorans	Zhongshania aliphaticivorans
GCA_001586275.1	Bacteria	Proteobacteria	Alphaproteobacteria	Sphingomonadales	Sphingomonadaceae	Parasphingorhabdus	Parasphingorhabdus sp001586275	Sphingorhabdus sp. M41
GCA_001632765.1	Bacteria	Proteobacteria	Gammaproteobacteria	Enterobacterales	Alteromonadaceae	Alteromonas	Alteromonas stellipolaris	Alteromonas stellipolaris
GCA_001632805.1	Bacteria	Actinobacteriota	Actinomycetia	Mycobacteriales	Mycobacteriaceae	Mycobacterium	Mycobacterium chelonae	Mycobacteroides chelonae CCUG 47445
GCA_001632825.1	Bacteria	Proteobacteria	Gammaproteobacteria	Enterobacterales	Alteromonadaceae	Alteromonas	Alteromonas stellipolaris	Alteromonas stellipolaris
GCA_001644665.1	Bacteria	Thermotogota	Thermotogae	Thermotogales	Fervidobacteriaceae	Fervidobacterium	Fervidobacterium pennivorans_A	Fervidobacterium pennivorans
GCA_001647085.1	Archaea	Methanobacteriota_B	Thermococci	Thermococcales	Thermococcaceae	Thermococcus	Thermococcus piezophilus	Thermococcus piezophilus
GCA_001648195.1	Bacteria	Proteobacteria	Gammaproteobacteria	Pseudomonadales	Pseudomonadaceae	Pseudomonas_A	Pseudomonas_A sp004010935	Pseudomonas stutzeri
GCA_001651805.1	Bacteria	Proteobacteria	Gammaproteobacteria	Pseudomonadales	Nitrincolaceae	Marinobacterium_A	Marinobacterium_A aestuarii	Marinobacterium aestuarii
GCA_001653755.1	Bacteria	Bacteroidota	Bacteroidia	Flavobacteriales	Flavobacteriaceae	Dokdonia	Dokdonia donghaensis	Dokdonia donghaensis DSW-1
GCA_001660505.1	Bacteria	Proteobacteria	Gammaproteobacteria	Vibrionales	Vibrionaceae	Vibrio	Vibrio anguillarum	Vibrio anguillarum
GCA_001663155.1	Bacteria	Proteobacteria	Alphaproteobacteria	Sphingomonadales	Sphingomonadaceae	Erythrobacter	Erythrobacter ishigakiensis	Altererythrobacter ishigakiensis
GCA_001664505.1	Bacteria	Acidobacteriota	Mor1	Mor1	Mor1	Mor1	Mor1 sp001664505	Acidobacteria bacterium Mor1
GCA_001677275.1	Bacteria	Proteobacteria	Gammaproteobacteria	Enterobacterales	Vibrionaceae	Vibrio	Vibrio breoganii	Vibrio breoganii
GCA_001677435.1	Bacteria	Proteobacteria	Gammaproteobacteria	Woeseiales	Woeseiaceae	Woeseia	Woeseia oceani	Woeseia oceani
GCA_001678945.1	Bacteria	Proteobacteria	Alphaproteobacteria	Rhodobacterales	Rhodobacteraceae	Pseudophaeobacter_A	Pseudophaeobacter_A gallaeciensis_A	Phaeobacter gallaeciensis
GCA_001679745.1	Bacteria	Proteobacteria	Gammaproteobacteria	Enterobacterales	Vibrionaceae	Vibrio	Vibrio alginolyticus	Vibrio alginolyticus
GCA_001680025.1	Bacteria	Proteobacteria	Gammaproteobacteria	Enterobacterales	Vibrionaceae	Vibrio	Vibrio natriegens	Vibrio natriegens NBRC 15636 = ATCC 14048 = DSM 759
GCA_001680045.1	Bacteria	Proteobacteria	Gammaproteobacteria	Enterobacterales	Vibrionaceae	Vibrio	Vibrio natriegens	Vibrio natriegens
GCA_001680065.1	Bacteria	Proteobacteria	Gammaproteobacteria	Enterobacterales	Vibrionaceae	Vibrio	Vibrio natriegens	Vibrio natriegens
GCA_001680085.1	Bacteria	Proteobacteria	Gammaproteobacteria	Enterobacterales	Vibrionaceae	Vibrio	Vibrio natriegens	Vibrio natriegens
GCA_001682135.1	Bacteria	Thermotogota	Thermotogae	Thermotogales	Fervidobacteriaceae	Thermosipho	Thermosipho affectus	Thermosipho sp. 1070
GCA_001682155.1	Bacteria	Proteobacteria	Gammaproteobacteria	PS1	Thioglobaceae	Pseudothioglobus	Pseudothioglobus singularis	Candidatus Pseudothioglobus singularis
GCA_001682195.2	Bacteria	Bacteroidetes	Cytophagia	Cytophagales	Flammeovirgaceae	Flammeovirga		Flammeovirga sp. MY04
GCA_001682295.1	Bacteria	Actinobacteriota	Actinomycetia	Mycobacteriales	Mycobacteriaceae	Rhodococcus	Rhodococcus qingshengii	Rhodococcus sp. 008
GCA_001685415.1	Bacteria	Actinobacteriota	Actinomycetia	Actinomycetales	Dermatophilaceae	Serinicoccus	Serinicoccus hydrothermalis	Serinicoccus hydrothermalis
GCA_001685465.1	Bacteria	Proteobacteria	Gammaproteobacteria	Enterobacterales	Vibrionaceae	Vibrio	Vibrio scophthalmi	Vibrio scophthalmi
GCA_001685485.1	Bacteria	Bacteroidota	Bacteroidia	Flavobacteriales	Flavobacteriaceae	Formosa	Formosa haliotis	Formosa haliotis
GCA_001687065.1	Bacteria	Bacteroidota	Chlorobia	Chlorobiales	Chlorobiaceae	Prosthecochloris	Prosthecochloris vibrioformis	Prosthecochloris sp. CIB 2401
GCA_001687105.1	Bacteria	Proteobacteria	Alphaproteobacteria	Rhodobacterales	Rhodobacteraceae	Salipiger	Salipiger sp001687105	Salipiger sp. CCB-MM3
GCA_001687545.1	Bacteria	Proteobacteria	Alphaproteobacteria	Sphingomonadales	Sphingomonadaceae	Paraurantiacibacter	Paraurantiacibacter namhicola	Paraurantiacibacter namhicola
GCA_001687605.2	Bacteria	Firmicutes	Bacilli	Bacillales_A	Planococcaceae	Planococcus	Planococcus plakortidis	Planococcus plakortidis
GCA_001687625.2	Bacteria	Firmicutes	Bacilli	Bacillales_A	Planococcaceae	Planococcus	Planococcus maritimus	Planococcus maritimus
GCA_001687665.2	Bacteria	Firmicutes	Bacilli	Bacillales_A	Planococcaceae	Planococcus	Planococcus donghaensis	Planococcus donghaensis
GCA_001687805.1	Bacteria	Proteobacteria	Gammaproteobacteria	Enterobacterales	Vibrionaceae	Vibrio	Vibrio scophthalmi	Vibrio scophthalmi
GCA_001693335.1	Bacteria	Campylobacterota	Campylobacteria	Campylobacterales	Helicobacteraceae	Helicobacter_G	Helicobacter_G sp001693335	Helicobacter enhydrae
GCA_001693615.1	Bacteria	Proteobacteria	Gammaproteobacteria	Enterobacterales	Vibrionaceae	Vibrio	Vibrio coralliilyticus	Vibrio coralliilyticus
GCA_001697185.1	Bacteria	Bacteroidota	Bacteroidia	Flavobacteriales	Flavobacteriaceae	Wenyingzhuangia	Wenyingzhuangia fucanilytica	Wenyingzhuangia fucanilytica
GCA_001698205.1	Bacteria	Proteobacteria	Alphaproteobacteria	Sphingomonadales	Sphingomonadaceae	Tsuneonella	Tsuneonella dongtanensis	Tsuneonella dongtanensis
GCA_001700835.1	Bacteria	Proteobacteria	Gammaproteobacteria	Enterobacterales	Vibrionaceae	Vibrio	Vibrio parahaemolyticus	Vibrio parahaemolyticus
GCA_001708405.1	Bacteria	Proteobacteria	Gammaproteobacteria	Enterobacterales	Kangiellaceae	Kangiella	Kangiella sediminilitoris	Kangiella sediminilitoris
GCA_001717465.1	Bacteria	Proteobacteria	Gammaproteobacteria	Xanthomonadales	Xanthomonadaceae	Luteimonas	Luteimonas sp001717465	Luteimonas sp. JM171
GCA_001719165.1	Bacteria	Proteobacteria	Alphaproteobacteria	Sphingomonadales	Sphingomonadaceae	Erythrobacter	Erythrobacter litoralis	Erythrobacter litoralis
GCA_001729625.1	Bacteria							bacterium AB1
GCA_001735715.1	Bacteria	Bacteroidota	Bacteroidia	Flavobacteriales	Flavobacteriaceae	GCA001735715	GCA001735715 sp001735715	Formosa sp. Hel3_A1_48
GCA_001735745.1	Bacteria	Bacteroidota	Bacteroidia	Flavobacteriales	Flavobacteriaceae	Hel1-33-131	Hel1-33-131 sp001735745	Formosa sp. Hel1_33_131
GCA_001746795.1	Bacteria	Proteobacteria	Gammaproteobacteria	Piscirickettsiales	Piscirickettsiaceae	Piscirickettsia	Piscirickettsia salmonis	Piscirickettsia salmonis
GCA_001747425.1	Bacteria	Actinobacteriota	Actinomycetia	Mycobacteriales	Pseudonocardiaceae	Actinoalloteichus	Actinoalloteichus hymeniacidonis	Actinoalloteichus hymeniacidonis
GCA_001750185.1	Bacteria	Proteobacteria	Gammaproteobacteria	Enterobacterales	Alteromonadaceae	Pseudoalteromonas	Pseudoalteromonas luteoviolacea_G	Pseudoalteromonas luteoviolacea
GCA_001761365.1	Bacteria	Bacteroidota	Bacteroidia	Flavobacteriales	Flavobacteriaceae	Polaribacter	Polaribacter vadi	Polaribacter vadi
GCA_001761385.1	Bacteria	Proteobacteria	Gammaproteobacteria	Burkholderiales	Burkholderiaceae	Hydrogenophaga	Hydrogenophaga crassostreae	Hydrogenophaga crassostreae
GCA_001761425.1	Archaea	Nanohaloarchaeota	Nanosalinia	Nanosalinales	Nanosalinaceae	Nanohalobium	Nanohalobium sp001761425	Nanohaloarchaea archaeon SG9
GCA_001767235.1	Bacteria	Cyanobacteria	Cyanobacteriia	Cyanobacteriales	Coleofasciculaceae	Moorea	Moorea producens_A	Moorena producens PAL-8-15-08-1
GCA_001767295.1	Bacteria	Proteobacteria	Gammaproteobacteria	Enterobacterales	Alteromonadaceae	Colwellia_A	Colwellia_A sp001767295	Colwellia sp. PAMC 20917
GCA_001767395.1	Bacteria	Actinobacteriota	Actinomycetia	Mycobacteriales	Mycobacteriaceae	Rhodococcus	Rhodococcus sp001767395	Rhodococcus sp. WMMA185
GCA_001831475.1	Bacteria	Bacteroidota	Bacteroidia	Flavobacteriales	Flavobacteriaceae	Flavobacterium	Flavobacterium crassostreae	Flavobacterium crassostreae
GCA_001831495.1	Bacteria	Proteobacteria	Gammaproteobacteria	Enterobacterales	Alteromonadaceae	Thalassotalea_A	Thalassotalea_A crassostreae	Thalassotalea crassostreae
GCA_001854065.1	Bacteria	Proteobacteria	Gammaproteobacteria	Pseudomonadales	Moraxellaceae	Psychrobacter	Psychrobacter pacificensis	Psychrobacter sp. AntiMn-1
GCA_001854125.1	Bacteria	Proteobacteria	Gammaproteobacteria	Pseudomonadales	Oleiphilaceae	Marinobacter	Marinobacter salinus	Marinobacter salinus
GCA_001854205.1	Bacteria	Cyanobacteria	Cyanobacteriia	Cyanobacteriales	Coleofasciculaceae	Moorea	Moorea producens	Moorena producens JHB
GCA_001854245.1	Bacteria	Desulfobacterota	Desulfobacteria	Desulfobacterales	Desulfococcaceae	Desulfococcus	Desulfococcus multivorans	Desulfococcus multivorans
GCA_001854405.1	Bacteria	Proteobacteria	Alphaproteobacteria	Caulobacterales	Hyphomonadaceae	Henriciella	Henriciella sp001854405	Hyphomonas sp. Mor2
GCA_001854425.1	Bacteria	Proteobacteria	Gammaproteobacteria	Enterobacterales	Vibrionaceae	Vibrio	Vibrio cholerae	Vibrio cholerae
GCA_001856665.1	Bacteria	Proteobacteria	Alphaproteobacteria	Rhodobacterales	Rhodobacteraceae	LPB0142	LPB0142 sp001856665	Rhodobacter sp. LPB0142
GCA_001857945.1	Bacteria	Firmicutes	Bacilli	Paenibacillales	Paenibacillaceae	Paenibacillus	Paenibacillus crassostreae	Paenibacillus crassostreae
GCA_001857985.1	Bacteria	Firmicutes	Bacilli	Bacillales	Bacillaceae	Bacillus	Bacillus velezensis	Bacillus velezensis
GCA_001865655.1	Bacteria	Bacteroidota	Bacteroidia	Flavobacteriales	Flavobacteriaceae	Maribacter	Maribacter dokdonensis	Maribacter sp. 1_2014MBL_MicDiv
GCA_001865855.1	Bacteria	Actinobacteriota	Actinomycetia	Mycobacteriales	Mycobacteriaceae	Nocardia	Nocardia seriolae	Nocardia seriolae
GCA_001877055.1	Bacteria	Actinobacteriota	Actinomycetia	Streptosporangiales	Streptosporangiaceae	Nocardiopsis	Nocardiopsis dassonvillei	Nocardiopsis dassonvillei
GCA_001880285.1	Bacteria	Bacteroidota	Bacteroidia	Flavobacteriales	UJ101	UJ101	UJ101 sp001880285	Flavobacteriaceae bacterium UJ101
GCA_001886375.1	Bacteria	Proteobacteria	Gammaproteobacteria	Enterobacterales	Alteromonadaceae	Alteromonas	Alteromonas gracilis	Alteromonas sp. Mex14
GCA_001886395.1	Bacteria	Proteobacteria	Gammaproteobacteria	Enterobacterales	Alteromonadaceae	Alteromonas	Alteromonas mediterranea	Alteromonas mediterranea
GCA_001886415.1	Bacteria	Proteobacteria	Gammaproteobacteria	Enterobacterales	Alteromonadaceae	Alteromonas	Alteromonas mediterranea	Alteromonas mediterranea
GCA_001886435.1	Bacteria	Proteobacteria	Gammaproteobacteria	Enterobacterales	Alteromonadaceae	Alteromonas	Alteromonas mediterranea	Alteromonas mediterranea
GCA_001886455.1	Bacteria	Proteobacteria	Gammaproteobacteria	Enterobacterales	Alteromonadaceae	Alteromonas	Alteromonas mediterranea	Alteromonas mediterranea
GCA_001886475.1	Bacteria	Proteobacteria	Gammaproteobacteria	Enterobacterales	Alteromonadaceae	Alteromonas	Alteromonas hispanica	Alteromonas sp. RW2A1
GCA_001886615.1	Bacteria	Proteobacteria	Gammaproteobacteria	Pseudomonadales	Halomonadaceae	Halomonas	Halomonas aestuarii	Halomonas aestuarii
GCA_001886695.1	Bacteria	Proteobacteria	Alphaproteobacteria	Sphingomonadales	Sphingomonadaceae	Alteraurantiacibacter	Alteraurantiacibacter gangjinensis	Aurantiacibacter gangjinensis
GCA_001886735.1	Bacteria	Proteobacteria	Alphaproteobacteria	Rhodobacterales	Rhodobacteraceae	Sulfitobacter	Sulfitobacter alexandrii	Sulfitobacter alexandrii
GCA_001886815.1	Bacteria	Calditrichota	Calditrichia	Calditrichales	Calditrichaceae	Caldithrix	Caldithrix abyssi	Caldithrix abyssi DSM 13497
GCA_001887055.1	Bacteria	Proteobacteria	Gammaproteobacteria	Enterobacterales	Vibrionaceae	Vibrio	Vibrio parahaemolyticus	Vibrio parahaemolyticus
GCA_001887715.1	Bacteria	Desulfobacterota	Desulfuromonadia	Desulfuromonadales	Syntrophotaleaceae	Syntrophotalea	Syntrophotalea acetylenica	Syntrophotalea acetylenica
GCA_001889025.1	Bacteria	Proteobacteria	Alphaproteobacteria	Sphingomonadales	Sphingomonadaceae	Sphingorhabdus_B	Sphingorhabdus_B sp001889025	Sphingorhabdus lutea
GCA_001889045.1	Bacteria	Bacteroidota	Bacteroidia	Flavobacteriales	Flavobacteriaceae	Tenacibaculum_A	Tenacibaculum_A todarodis	Tenacibaculum todarodis
GCA_001889165.1	Bacteria	Firmicutes	Bacilli	Bacillales	Bacillaceae	Metabacillus	Metabacillus weihaiensis	Bacillus weihaiensis
GCA_001889405.1	Archaea	Halobacteriota	Methanosarcinia	Methanosarcinales	Methanosarcinaceae	Methanohalophilus	Methanohalophilus halophilus	Methanohalophilus halophilus
GCA_001889605.1	Bacteria	Proteobacteria	Alphaproteobacteria	Rhizobiales	Rhizobiaceae	Mesorhizobium_E	Mesorhizobium_E oceanicum	Aquibium oceanicum
GCA_001895265.1	Bacteria	Proteobacteria	Gammaproteobacteria	Francisellales	Francisellaceae	Francisella	Francisella uliginis	Francisella uliginis
GCA_001895885.1	Bacteria	Firmicutes	Bacilli	Bacillales	Bacillaceae	Bacillus	Bacillus safensis	Bacillus safensis
GCA_001908435.2	Bacteria	Proteobacteria	Gammaproteobacteria	Enterobacterales	Vibrionaceae	Vibrio	Vibrio harveyi	Vibrio harveyi
GCA_001908835.1	Bacteria	Proteobacteria	Alphaproteobacteria	Rhodobacterales	Rhodobacteraceae	Marivivens	Marivivens sp001908835	Marivivens sp. JLT3646
GCA_001932535.1	Bacteria	Proteobacteria	Gammaproteobacteria	Pseudomonadales	DSM-6294	Thalassolituus	Thalassolituus oleivorans	Thalassolituus oleivorans
GCA_001932595.1	Bacteria	Proteobacteria	Gammaproteobacteria	Piscirickettsiales	Piscirickettsiaceae	Piscirickettsia	Piscirickettsia salmonis	Piscirickettsia salmonis
GCA_001932675.1	Bacteria	Bacteroidota	Bacteroidia	Flavobacteriales	Flavobacteriaceae	Salegentibacter	Salegentibacter agarivorans	Salegentibacter sp. T436
GCA_001932735.1	Bacteria	Proteobacteria	Gammaproteobacteria	Piscirickettsiales	Piscirickettsiaceae	Piscirickettsia	Piscirickettsia salmonis	Piscirickettsia salmonis
GCA_001932755.1	Bacteria	Proteobacteria	Gammaproteobacteria	Piscirickettsiales	Piscirickettsiaceae	Piscirickettsia	Piscirickettsia salmonis	Piscirickettsia salmonis
GCA_001932775.1	Bacteria	Proteobacteria	Gammaproteobacteria	Piscirickettsiales	Piscirickettsiaceae	Piscirickettsia	Piscirickettsia salmonis	Piscirickettsia salmonis
GCA_001932815.1	Bacteria	Proteobacteria	Gammaproteobacteria	Piscirickettsiales	Piscirickettsiaceae	Piscirickettsia	Piscirickettsia salmonis	Piscirickettsia salmonis
GCA_001932835.1	Bacteria	Proteobacteria	Gammaproteobacteria	Piscirickettsiales	Piscirickettsiaceae	Piscirickettsia	Piscirickettsia salmonis	Piscirickettsia salmonis
GCA_001932855.1	Bacteria	Proteobacteria	Gammaproteobacteria	Piscirickettsiales	Piscirickettsiaceae	Piscirickettsia	Piscirickettsia salmonis	Piscirickettsia salmonis
GCA_001932875.1	Bacteria	Proteobacteria	Gammaproteobacteria	Piscirickettsiales	Piscirickettsiaceae	Piscirickettsia	Piscirickettsia salmonis	Piscirickettsia salmonis
GCA_001932895.1	Bacteria	Proteobacteria	Gammaproteobacteria	Piscirickettsiales	Piscirickettsiaceae	Piscirickettsia	Piscirickettsia salmonis	Piscirickettsia salmonis
GCA_001932915.1	Bacteria	Proteobacteria	Gammaproteobacteria	Piscirickettsiales	Piscirickettsiaceae	Piscirickettsia	Piscirickettsia salmonis	Piscirickettsia salmonis
GCA_001932935.1	Bacteria	Proteobacteria	Gammaproteobacteria	Piscirickettsiales	Piscirickettsiaceae	Piscirickettsia	Piscirickettsia salmonis	Piscirickettsia salmonis
GCA_001932955.1	Bacteria	Proteobacteria	Gammaproteobacteria	Piscirickettsiales	Piscirickettsiaceae	Piscirickettsia	Piscirickettsia salmonis	Piscirickettsia salmonis
GCA_001941345.1	Bacteria	Actinobacteriota	Actinomycetia	Mycobacteriales	Mycobacteriaceae	Corynebacterium	Corynebacterium stationis	Corynebacterium stationis
GCA_001941365.1	Bacteria	Thermotogota	Thermotogae	Thermotogales	Fervidobacteriaceae	Thermosipho	Thermosipho affectus	Thermosipho sp. 1063
GCA_001941385.1	Bacteria	Thermotogota	Thermotogae	Thermotogales	Fervidobacteriaceae	Thermosipho	Thermosipho melanesiensis	Thermosipho melanesiensis
GCA_001941505.1	Bacteria	Actinobacteriota	Actinomycetia	Mycobacteriales	Mycobacteriaceae	Corynebacterium	Corynebacterium sphenisci	Corynebacterium sphenisci DSM 44792
GCA_001941525.1	Bacteria	Thermotogota	Thermotogae	Petrotogales	Petrotogaceae	Marinitoga	Marinitoga piezophila	Marinitoga sp. 1137
GCA_001941565.1	Bacteria	Actinobacteriota	Actinomycetia	Mycobacteriales	Mycobacteriaceae	Corynebacterium	Corynebacterium phocae	Corynebacterium phocae
GCA_001941605.1	Bacteria	Bacteroidota	Bacteroidia	Flavobacteriales	Flavobacteriaceae	Cellulophaga	Cellulophaga lytica	Cellulophaga lytica
GCA_001941625.1	Bacteria	Actinobacteriota	Actinomycetia	Mycobacteriales	Pseudonocardiaceae	Actinoalloteichus	Actinoalloteichus fjordicus	Actinoalloteichus fjordicus
GCA_001941645.1	Bacteria	Actinobacteriota	Actinomycetia	Mycobacteriales	Pseudonocardiaceae	Actinoalloteichus	Actinoalloteichus fjordicus	Actinoalloteichus sp. GBA129-24
GCA_001951155.1	Bacteria	Bacteroidota	Bacteroidia	Flavobacteriales	Flavobacteriaceae	Gramella	Gramella flava	Gramella flava JLT2011
GCA_001956755.1	Bacteria	Firmicutes	Bacilli	Staphylococcales	Staphylococcaceae	Staphylococcus	Staphylococcus aureus	Staphylococcus aureus
GCA_001969345.1	Bacteria	Proteobacteria	Alphaproteobacteria	Rhodobacterales	Rhodobacteraceae	Phaeobacter	Phaeobacter inhibens	Phaeobacter inhibens
GCA_001969365.1	Bacteria	Proteobacteria	Alphaproteobacteria	Rhodobacterales	Rhodobacteraceae	Tateyamaria	Tateyamaria omphalii_A	Tateyamaria omphalii
GCA_001969385.1	Bacteria	Proteobacteria	Alphaproteobacteria	Rhodobacterales	Rhodobacteraceae	Salipiger	Salipiger profundus	Salipiger profundus
GCA_001971745.1	Bacteria	Bacteroidota	Bacteroidia	Flavobacteriales	Flavobacteriaceae	Lacinutrix	Lacinutrix venerupis	Lacinutrix venerupis
GCA_001975665.1	Bacteria	Bacteroidota	Bacteroidia	Flavobacteriales	Flavobacteriaceae	Polaribacter	Polaribacter reichenbachii	Polaribacter reichenbachii
GCA_001975705.1	Bacteria	Proteobacteria	Alphaproteobacteria	Rhodobacterales	Rhodobacteraceae	Salipiger	Salipiger abyssi	Salipiger abyssi
GCA_001983995.1	Bacteria	Proteobacteria	Gammaproteobacteria	Pseudomonadales	Halieaceae	Halioglobus	Halioglobus japonicus	Halioglobus japonicus
GCA_001989655.1	Bacteria	Proteobacteria	Gammaproteobacteria	Vibrionales	Vibrionaceae	Vibrio	Vibrio anguillarum	Vibrio anguillarum
GCA_001989675.1	Bacteria	Proteobacteria	Gammaproteobacteria	Vibrionales	Vibrionaceae	Vibrio	Vibrio anguillarum	Vibrio anguillarum
GCA_001989695.1	Bacteria	Proteobacteria	Gammaproteobacteria	Enterobacterales	Vibrionaceae	Vibrio	Vibrio anguillarum	Vibrio anguillarum (Listonella anguillarum)
GCA_001989715.1	Bacteria	Proteobacteria	Gammaproteobacteria	Vibrionales	Vibrionaceae	Vibrio	Vibrio anguillarum	Vibrio anguillarum
GCA_001989735.1	Bacteria	Proteobacteria	Gammaproteobacteria	Vibrionales	Vibrionaceae	Vibrio	Vibrio anguillarum	Vibrio anguillarum
GCA_001989755.1	Bacteria	Proteobacteria	Gammaproteobacteria	Vibrionales	Vibrionaceae	Vibrio	Vibrio anguillarum	Vibrio anguillarum
GCA_001989775.1	Bacteria	Proteobacteria	Gammaproteobacteria	Vibrionales	Vibrionaceae	Vibrio	Vibrio anguillarum	Vibrio anguillarum
GCA_001989795.1	Bacteria	Proteobacteria	Gammaproteobacteria	Vibrionales	Vibrionaceae	Vibrio	Vibrio anguillarum	Vibrio anguillarum
GCA_001989815.1	Bacteria	Proteobacteria	Gammaproteobacteria	Vibrionales	Vibrionaceae	Vibrio	Vibrio anguillarum	Vibrio anguillarum
GCA_001989835.1	Bacteria	Proteobacteria	Gammaproteobacteria	Vibrionales	Vibrionaceae	Vibrio	Vibrio anguillarum	Vibrio anguillarum
GCA_001989855.1	Bacteria	Proteobacteria	Gammaproteobacteria	Vibrionales	Vibrionaceae	Vibrio	Vibrio anguillarum	Vibrio anguillarum
GCA_001989895.1	Bacteria	Proteobacteria	Gammaproteobacteria	Vibrionales	Vibrionaceae	Vibrio	Vibrio anguillarum	Vibrio anguillarum
GCA_001989915.1	Bacteria	Proteobacteria	Gammaproteobacteria	Vibrionales	Vibrionaceae	Vibrio	Vibrio anguillarum	Vibrio anguillarum
GCA_001989935.1	Bacteria	Proteobacteria	Gammaproteobacteria	Vibrionales	Vibrionaceae	Vibrio	Vibrio anguillarum	Vibrio anguillarum
GCA_001989995.1	Bacteria	Proteobacteria	Gammaproteobacteria	Vibrionales	Vibrionaceae	Vibrio	Vibrio anguillarum	Vibrio anguillarum
GCA_001990025.1	Bacteria	Proteobacteria	Gammaproteobacteria	Enterobacterales	Vibrionaceae	Vibrio	Vibrio anguillarum	Vibrio anguillarum (Listonella anguillarum)
GCA_001990045.1	Bacteria	Proteobacteria	Gammaproteobacteria	Vibrionales	Vibrionaceae	Vibrio	Vibrio anguillarum	Vibrio anguillarum
GCA_001990065.1	Bacteria	Proteobacteria	Gammaproteobacteria	Vibrionales	Vibrionaceae	Vibrio	Vibrio anguillarum	Vibrio anguillarum
GCA_001990085.1	Bacteria	Proteobacteria	Gammaproteobacteria	Vibrionales	Vibrionaceae	Vibrio	Vibrio anguillarum	Vibrio anguillarum
GCA_001990105.1	Bacteria	Proteobacteria	Gammaproteobacteria	Vibrionales	Vibrionaceae	Vibrio	Vibrio anguillarum	Vibrio anguillarum
GCA_001991055.1	Bacteria	Proteobacteria	Gammaproteobacteria	Enterobacterales	Vibrionaceae	Vibrio	Vibrio campbellii	Vibrio campbellii
GCA_001997225.1	Bacteria	Proteobacteria	Gammaproteobacteria	Enterobacterales	Vibrionaceae	Vibrio	Vibrio anguillarum	Vibrio anguillarum (Listonella anguillarum)
GCA_001997345.1	Bacteria	Actinobacteriota	Actinomycetia	Propionibacteriales	Propionibacteriaceae	Arachnia	Arachnia aquimaris	Tessaracoccus aquimaris
GCA_001998865.1	Bacteria	Actinobacteriota	Actinomycetia	Propionibacteriales	Propionibacteriaceae	Arachnia	Arachnia flavescens	Tessaracoccus flavescens
GCA_001999225.1	Bacteria	Proteobacteria	Gammaproteobacteria	Enterobacterales	Alteromonadaceae	Pseudoalteromonas	Pseudoalteromonas aliena	Pseudoalteromonas aliena
GCA_001999945.1	Bacteria	Proteobacteria	Gammaproteobacteria	Pseudomonadales	Cellvibrionaceae	Microbulbifer	Microbulbifer agarilyticus_A	Microbulbifer agarilyticus
GCA_002005305.1	Bacteria	Proteobacteria	Gammaproteobacteria	Enterobacterales	Shewanellaceae	Shewanella	Shewanella psychrophila	Shewanella psychrophila
GCA_002009175.1	Bacteria	Actinobacteriota	Actinomycetia	Streptomycetales	Streptomycetaceae	Streptomyces	Streptomyces niveus_A	Streptomyces niveus
GCA_002009425.1	Bacteria	Proteobacteria	Gammaproteobacteria	Chromatiales	Sedimenticolaceae	41T-STBD-0c-01a	41T-STBD-0c-01a sp002009425	Chromatiaceae bacterium 2141T.STBD.0c.01a
GCA_002012365.1	Bacteria	Firmicutes	Bacilli	Lactobacillales	Streptococcaceae	Streptococcus	Streptococcus thermophilus	Streptococcus thermophilus
GCA_002021755.1	Bacteria	Proteobacteria	Gammaproteobacteria	Enterobacterales	Vibrionaceae	Vibrio	Vibrio owensii	Vibrio owensii
GCA_002072815.1	Bacteria	Proteobacteria	Gammaproteobacteria	Pseudomonadales	Alcanivoracaceae	Alcanivorax	Alcanivorax xenomutans	Alcanivorax xenomutans
GCA_002073975.1	Bacteria	Proteobacteria	Alphaproteobacteria	Rhodobacterales	Rhodobacteraceae	Rhodovulum	Rhodovulum sp002073975	Rhodovulum sp. MB263
GCA_002073995.1	Bacteria	Proteobacteria	Gammaproteobacteria	Enterobacterales	Vibrionaceae	Vibrio	Vibrio coralliilyticus	Vibrio coralliilyticus
GCA_002075795.1	Bacteria	Proteobacteria	Gammaproteobacteria	Enterobacterales	Shewanellaceae	Shewanella	Shewanella japonica	Shewanella japonica
GCA_002079305.1	Bacteria	Proteobacteria	Alphaproteobacteria	Rhodobacterales	Rhodobacteraceae	Rhodovulum	Rhodovulum sp002079305	Rhodovulum sp. P5
GCA_002082175.1	Bacteria	Actinobacteriota	Actinomycetia	Streptomycetales	Streptomycetaceae	Streptomyces	Streptomyces californicus	Streptomyces violaceoruber
GCA_002097535.1	Bacteria	Firmicutes	Bacilli	Bacillales_D	Halobacillaceae	Halobacillus	Halobacillus mangrovi	Halobacillus mangrovi
GCA_002117085.1	Bacteria	Bacteroidota	Bacteroidia	Flavobacteriales	Flavobacteriaceae	Nonlabens	Nonlabens tegetincola	Nonlabens tegetincola
GCA_002117105.1	Bacteria	Proteobacteria	Gammaproteobacteria	Pseudomonadales	DSM-21967	Oceanicoccus	Oceanicoccus sagamiensis	Oceanicoccus sagamiensis
GCA_002117125.1	Bacteria	Bacteroidota	Bacteroidia	Flavobacteriales	Flavobacteriaceae	Nonlabens	Nonlabens spongiae	Nonlabens spongiae
GCA_002117205.1	Bacteria	Proteobacteria	Gammaproteobacteria	Enterobacterales	Vibrionaceae	Vibrio	Vibrio vulnificus	Vibrio vulnificus
GCA_002119505.2	Bacteria	Proteobacteria	Gammaproteobacteria	Enterobacterales	Vibrionaceae	Vibrio	Vibrio alginolyticus	Vibrio alginolyticus
GCA_002119525.1	Bacteria	Proteobacteria	Gammaproteobacteria	Enterobacterales	Vibrionaceae	Vibrio	Vibrio tasmaniensis	Vibrio alginolyticus
GCA_002119545.1	Bacteria	Proteobacteria	Gammaproteobacteria	Enterobacterales	Vibrionaceae	Vibrio	Vibrio alginolyticus	Vibrio alginolyticus
GCA_002119565.1	Bacteria	Proteobacteria	Gammaproteobacteria	Enterobacterales	Vibrionaceae	Vibrio	Vibrio alginolyticus	Vibrio alginolyticus
GCA_002119585.1	Bacteria	Proteobacteria	Gammaproteobacteria	Enterobacterales	Vibrionaceae	Vibrio	Vibrio alginolyticus	Vibrio alginolyticus
GCA_002119765.1	Bacteria	Proteobacteria	Alphaproteobacteria	Rhizobiales	Xanthobacteraceae	Pseudorhodoplanes	Pseudorhodoplanes sinuspersici	Pseudorhodoplanes sinuspersici
GCA_002128305.1	Bacteria	Actinobacteriota	Actinomycetia	Streptomycetales	Streptomycetaceae	Streptomyces	Streptomyces sp002128305	Streptomyces marincola
GCA_002140055.1	Bacteria	Proteobacteria	Gammaproteobacteria	Enterobacterales	Vibrionaceae	Vibrio	Vibrio campbellii	Vibrio campbellii
GCA_002142655.1	Bacteria	Proteobacteria	Gammaproteobacteria	Enterobacterales	Vibrionaceae	Vibrio	Vibrio campbellii	Vibrio campbellii
GCA_002149065.1	Bacteria	Proteobacteria	Gammaproteobacteria	Enterobacterales	Vibrionaceae	Vibrio	Vibrio alginolyticus	Vibrio alginolyticus
GCA_002149085.1	Bacteria	Proteobacteria	Gammaproteobacteria	Enterobacterales	Vibrionaceae	Vibrio	Vibrio alginolyticus	Vibrio alginolyticus
GCA_002149105.1	Bacteria	Proteobacteria	Gammaproteobacteria	Enterobacterales	Vibrionaceae	Vibrio	Vibrio alginolyticus	Vibrio alginolyticus
GCA_002157205.1	Bacteria	Proteobacteria	Gammaproteobacteria	Pseudomonadales	Halomonadaceae	Kushneria	Kushneria marisflavi	Kushneria marisflavi
GCA_002157225.2	Bacteria	Proteobacteria	Gammaproteobacteria	Pseudomonadales	Cellvibrionaceae	Agarilytica	Agarilytica rhodophyticola	Agarilytica rhodophyticola
GCA_002157895.1	Bacteria	Proteobacteria	Gammaproteobacteria	Enterobacterales	Aeromonadaceae	Oceanisphaera	Oceanisphaera profunda	Oceanisphaera profunda
GCA_002162375.1	Bacteria	Proteobacteria	Gammaproteobacteria	Pseudomonadales	Oleiphilaceae	Oleiphilus	Oleiphilus messinensis	Oleiphilus messinensis
GCA_002163795.1	Bacteria	Proteobacteria	Gammaproteobacteria	Enterobacterales	Vibrionaceae	Vibrio	Vibrio anguillarum	Vibrio anguillarum (Listonella anguillarum)
GCA_002192415.1	Bacteria	Firmicutes	Bacilli	Paenibacillales	Paenibacillaceae	Paenibacillus	Paenibacillus donghaensis	Paenibacillus donghaensis
GCA_002196515.1	Bacteria	Proteobacteria	Gammaproteobacteria	Enterobacterales	Vibrionaceae	Vibrio	Vibrio gazogenes_A	Vibrio gazogenes
GCA_002204915.1	Bacteria	Proteobacteria	Gammaproteobacteria	Enterobacterales	Vibrionaceae	Vibrio	Vibrio vulnificus	Vibrio vulnificus
GCA_002208135.1	Bacteria	Proteobacteria	Gammaproteobacteria	Enterobacterales	Alteromonadaceae	Pseudoalteromonas	Pseudoalteromonas piscicida_A	Pseudoalteromonas piscicida
GCA_002211785.1	Bacteria	Proteobacteria	Gammaproteobacteria	Francisellales	Francisellaceae	Francisella	Francisella halioticida	Francisella halioticida
GCA_002211985.1	Bacteria	Proteobacteria	Gammaproteobacteria	Enterobacterales	Vibrionaceae	Vibrio	Vibrio anguillarum	Vibrio anguillarum (Listonella anguillarum)
GCA_002212005.1	Bacteria	Proteobacteria	Gammaproteobacteria	Enterobacterales	Vibrionaceae	Vibrio	Vibrio anguillarum	Vibrio anguillarum (Listonella anguillarum)
GCA_002212025.1	Bacteria	Proteobacteria	Gammaproteobacteria	Enterobacterales	Vibrionaceae	Vibrio	Vibrio anguillarum	Vibrio anguillarum (Listonella anguillarum)
GCA_002214245.1	Bacteria	Proteobacteria	Gammaproteobacteria	Enterobacterales	Aeromonadaceae	Aeromonas	Aeromonas salmonicida	Aeromonas salmonicida
GCA_002214265.1	Bacteria	Proteobacteria	Gammaproteobacteria	Enterobacterales	Aeromonadaceae	Aeromonas	Aeromonas salmonicida	Aeromonas salmonicida
GCA_002214305.1	Bacteria	Proteobacteria	Gammaproteobacteria	Enterobacterales	Aeromonadaceae	Aeromonas	Aeromonas salmonicida	Aeromonas salmonicida
GCA_002214345.1	Bacteria	Proteobacteria	Gammaproteobacteria	Enterobacterales	Vibrionaceae	Vibrio	Vibrio mediterranei	Vibrio mediterranei
GCA_002214395.1	Bacteria	Proteobacteria	Gammaproteobacteria	Enterobacterales	Vibrionaceae	Vibrio	Vibrio rotiferianus	Vibrio rotiferianus
GCA_002215135.1	Bacteria	Proteobacteria	Gammaproteobacteria	Enterobacterales	Vibrionaceae	Vibrio	Vibrio vulnificus	Vibrio vulnificus
GCA_002215215.1	Bacteria	Proteobacteria	Gammaproteobacteria	Granulosicoccales	Granulosicoccaceae	Granulosicoccus	Granulosicoccus antarcticus	Granulosicoccus antarcticus IMCC3135
GCA_002215465.1	Bacteria	Firmicutes	Bacilli	Bacillales	Staphylococcaceae	Salinicoccus		Salinicoccus sp. BAB 3246
GCA_002215585.1	Bacteria	Proteobacteria	Gammaproteobacteria	Enterobacterales	Shewanellaceae	Shewanella	Shewanella marisflavi	Shewanella marisflavi
GCA_002216855.1	Bacteria	Proteobacteria	Gammaproteobacteria	Enterobacterales	Vibrionaceae	Paraphotobacterium	Paraphotobacterium marinum	Paraphotobacterium marinum
GCA_002220115.1	Bacteria	Firmicutes	Bacilli	Lactobacillales	Streptococcaceae	Streptococcus	Streptococcus iniae	Streptococcus iniae
GCA_002221525.1	Bacteria	Proteobacteria	Gammaproteobacteria	Enterobacterales	Alteromonadaceae	Pseudoalteromonas	Pseudoalteromonas espejiana	Pseudoalteromonas espejiana DSM 9414
GCA_002237405.1	Bacteria	Proteobacteria	Gammaproteobacteria	Pseudomonadales	Pseudomonadaceae	Pseudomonas	Pseudomonas aeruginosa	Pseudomonas aeruginosa
GCA_002237425.1	Bacteria	Proteobacteria	Gammaproteobacteria	Pseudomonadales	Pseudomonadaceae	Pseudomonas	Pseudomonas aeruginosa	Pseudomonas aeruginosa
GCA_002237535.1	Bacteria	Proteobacteria	Gammaproteobacteria	Pseudomonadales	DSM-6294	Bacterioplanes	Bacterioplanes sanyensis_A	Bacterioplanes sanyensis
GCA_002237615.1	Bacteria	Proteobacteria	Alphaproteobacteria	Sphingomonadales	Sphingomonadaceae	Qipengyuania	Qipengyuania flava	Qipengyuania flava
GCA_002240205.1	Bacteria	Bacteroidota	Chlorobia	Chlorobiales	Chlorobiaceae	Chlorobium_A	Chlorobium_A sp002240205	Prosthecochloris sp. GSB1
GCA_002240355.1	Bacteria	Actinobacteriota	Actinomycetia	Mycobacteriales	Pseudonocardiaceae	Saccharomonospora	Saccharomonospora marina_A	Prauserella marina
GCA_002269385.1	Bacteria	Bacteroidota	Bacteroidia	Flavobacteriales	Flavobacteriaceae	Maribacter	Maribacter cobaltidurans	Maribacter cobaltidurans
GCA_002287545.1	Bacteria	Proteobacteria	Gammaproteobacteria	Enterobacterales	Vibrionaceae	Vibrio	Vibrio anguillarum	Vibrio anguillarum (Listonella anguillarum)
GCA_002290105.1	Bacteria	Firmicutes	Bacilli	Bacillales	Bacillaceae_G	Bacillus_A	Bacillus_A paranthracis	Bacillus cereus
GCA_002291265.1	Bacteria	Proteobacteria	Gammaproteobacteria	Enterobacterales	Vibrionaceae	Vibrio	Vibrio anguillarum	Vibrio anguillarum (Listonella anguillarum)
GCA_002310335.1	Bacteria	Proteobacteria	Gammaproteobacteria	Enterobacterales	Vibrionaceae	Vibrio	Vibrio anguillarum	Vibrio anguillarum (Listonella anguillarum)
GCA_002310795.1	Bacteria	Proteobacteria	Gammaproteobacteria	Enterobacterales	Alteromonadaceae	Pseudoalteromonas	Pseudoalteromonas tetraodonis	Pseudoalteromonas issachenkonii
GCA_002310815.1	Bacteria	Proteobacteria	Gammaproteobacteria	Enterobacterales	Alteromonadaceae	Pseudoalteromonas	Pseudoalteromonas tunicata	Pseudoalteromonas tunicata
GCA_002310855.1	Bacteria	Proteobacteria	Gammaproteobacteria	Enterobacterales	Alteromonadaceae	Pseudoalteromonas	Pseudoalteromonas atlantica	Pseudoalteromonas agarivorans DSM 14585
GCA_002313025.1	Bacteria	Proteobacteria	Gammaproteobacteria	Enterobacterales	Vibrionaceae	Vibrio	Vibrio cholerae	Vibrio cholerae
GCA_002355395.1	Bacteria	Actinobacteriota	Actinomycetia	Actinomycetales	Microbacteriaceae	Microcella	Microcella alkaliphila_A	Microcella alkaliphila
GCA_002355575.1	Bacteria	Firmicutes	Bacilli	Lactobacillales	Streptococcaceae	Lactococcus	Lactococcus formosensis	Lactococcus garvieae
GCA_002355635.1	Archaea	Halobacteriota	Halobacteria	Halobacteriales	Haloferacaceae	Halopenitus	Halopenitus persicus_A	Halopenitus persicus
GCA_002355655.1	Archaea	Halobacteriota	Halobacteria	Halobacteriales	Haloferacaceae	Halorubrum	Halorubrum trapanicum_A	Halorubrum trapanicum
GCA_002356035.1	Bacteria	Actinobacteriota	Actinomycetia	Mycobacteriales	Mycobacteriaceae	Nocardia	Nocardia seriolae	Nocardia seriolae
GCA_002356215.1	Bacteria	Cyanobacteria	Cyanobacteriia	Cyanobacteriales	Cyanobacteriaceae	Limnothrix	Limnothrix sp002356215	Synechococcus sp. NIES-970
GCA_002356295.1	Bacteria	Bacteroidota	Bacteroidia	Bacteroidales	Marinifilaceae	Labilibaculum	Labilibaculum antarcticum	Labilibaculum antarcticum
GCA_002356335.1	Bacteria	Actinobacteriota	Actinomycetia	Mycobacteriales	Mycobacteriaceae	Mycobacterium	Mycobacterium stephanolepidis	[Mycobacterium] stephanolepidis
GCA_002368095.1	Bacteria	Cyanobacteria	Cyanobacteriia	Cyanobacteriales	Nostocaceae	Rivularia	Rivularia parasitica	Calothrix parasitica NIES-267
GCA_002374815.1	Bacteria	Proteobacteria	Gammaproteobacteria	Enterobacterales	Alteromonadaceae	Pseudoalteromonas	Pseudoalteromonas atlantica	Pseudoalteromonas atlantica
GCA_002381285.1	Bacteria	Proteobacteria	Alphaproteobacteria	Rhodobacterales	Rhodobacteraceae	Phaeobacter	Phaeobacter gallaeciensis	Phaeobacter gallaeciensis
GCA_002381305.1	Bacteria	Proteobacteria	Alphaproteobacteria	Rhodobacterales	Rhodobacteraceae	Phaeobacter	Phaeobacter gallaeciensis	Phaeobacter gallaeciensis
GCA_002381325.1	Bacteria	Proteobacteria	Alphaproteobacteria	Rhodobacterales	Rhodobacteraceae	Phaeobacter	Phaeobacter gallaeciensis	Phaeobacter gallaeciensis
GCA_002381345.1	Bacteria	Proteobacteria	Gammaproteobacteria	Enterobacterales	Vibrionaceae	Enterovibrio	Enterovibrio luxaltus	Candidatus Enterovibrio luxaltus
GCA_002381365.1	Bacteria	Proteobacteria	Alphaproteobacteria	Rhodobacterales	Rhodobacteraceae	Phaeobacter	Phaeobacter gallaeciensis	Phaeobacter gallaeciensis
GCA_002381385.1	Bacteria	Proteobacteria	Alphaproteobacteria	Rhodobacterales	Rhodobacteraceae	Phaeobacter	Phaeobacter gallaeciensis	Phaeobacter gallaeciensis
GCA_002393525.1	Bacteria	Proteobacteria	Alphaproteobacteria	Rhodobacterales	Rhodobacteraceae	Phaeobacter	Phaeobacter gallaeciensis	Phaeobacter gallaeciensis
GCA_002407265.1	Bacteria	Proteobacteria	Alphaproteobacteria	Rhodobacterales	Rhodobacteraceae	Celeribacter	Celeribacter ethanolicus	Celeribacter ethanolicus
GCA_002407485.1	Bacteria	Proteobacteria	Gammaproteobacteria	Enterobacterales	Aeromonadaceae	Zobellella	Zobellella denitrificans	Zobellella denitrificans
GCA_002407505.1	Bacteria	Proteobacteria	Gammaproteobacteria	Enterobacterales	Alteromonadaceae	Pseudoalteromonas	Pseudoalteromonas fuliginea	Pseudoalteromonas sp. 1_2015MBL_MicDiv
GCA_002412025.1	Bacteria	Proteobacteria	Alphaproteobacteria	Rhodobacterales	Rhodobacteraceae	Phaeobacter	Phaeobacter piscinae	Phaeobacter piscinae
GCA_002412045.1	Bacteria	Proteobacteria	Alphaproteobacteria	Rhodobacterales	Rhodobacteraceae	Phaeobacter	Phaeobacter piscinae	Phaeobacter piscinae
GCA_002442495.2	Bacteria	Proteobacteria	Gammaproteobacteria	Enterobacterales	Enterobacteriaceae	Yersinia	Yersinia ruckeri	Yersinia ruckeri
GCA_002442875.1	Bacteria	Bdellovibrionota	Bacteriovoracia	Bacteriovoracales	Bacteriovoracaceae	Halobacteriovorax	Halobacteriovorax marinus	Halobacteriovorax marinus
GCA_002443175.1	Bacteria	Proteobacteria	Gammaproteobacteria	Methylococcales	Cycloclasticaceae	Cycloclasticus	Cycloclasticus pugetii	Cycloclasticus sp. PY97N
GCA_002501585.1	Bacteria	Actinobacteriota	Actinomycetia	Mycobacteriales	Mycobacteriaceae	Rhodococcus	Rhodococcus erythropolis	Rhodococcus sp. H-CA8f
GCA_002504165.1	Bacteria	Proteobacteria	Alphaproteobacteria	Rhodobacterales	Rhodobacteraceae	Pacificitalea	Pacificitalea manganoxidans	Pacificitalea manganoxidans
GCA_002504285.1	Bacteria	Proteobacteria	Gammaproteobacteria	Enterobacterales	Enterobacteriaceae	Edwardsiella	Edwardsiella tarda	Edwardsiella tarda
GCA_002688545.1	Bacteria	Actinobacteriota	Actinomycetia	Mycobacteriales	Micromonosporaceae	Micromonospora	Micromonospora sediminicola	Micromonospora sp. WMMA2032
GCA_002741725.1	Bacteria	Actinobacteriota	Actinomycetia	Mycobacteriales	Mycobacteriaceae	Rhodococcus	Rhodococcus ruber	Rhodococcus ruber
GCA_002776575.1	Bacteria	Proteobacteria	Alphaproteobacteria	Sphingomonadales	Sphingomonadaceae	Parasphingorhabdus	Parasphingorhabdus sp002776575	Sphingorhabdus sp. YGSMI21
GCA_002795805.1	Bacteria	Proteobacteria	Zetaproteobacteria	Mariprofundales	Mariprofundaceae	Mariprofundus	Mariprofundus aestuarium	Mariprofundus aestuarium
GCA_002795825.1	Bacteria	Proteobacteria	Zetaproteobacteria	Mariprofundales	Mariprofundaceae	Mariprofundus	Mariprofundus ferrinatatus	Mariprofundus ferrinatatus
GCA_002795845.1	Bacteria	Proteobacteria	Gammaproteobacteria	Pseudomonadales	Natronospirillaceae	Reinekea	Reinekea forsetii	Reinekea forsetii
GCA_002795865.1	Bacteria	Proteobacteria	Alphaproteobacteria	Sphingomonadales	Sphingomonadaceae	Qipengyuania	Qipengyuania seohaensis	Qipengyuania seohaensis
GCA_002804065.1	Bacteria	Firmicutes	Bacilli	Kyrpidiales	Kyrpidiaceae	Kyrpidia	Kyrpidia spormannii	Kyrpidia spormannii
GCA_002813655.1	Archaea	Methanobacteriota	Methanobacteria	Methanobacteriales	Methanobacteriaceae	Methanobacterium	Methanobacterium subterraneum	Methanobacterium subterraneum
GCA_002813675.1	Archaea	Methanobacteriota	Methanobacteria	Methanobacteriales	Methanobacteriaceae	Methanobacterium	Methanobacterium subterraneum	Methanobacterium sp. MZ-A1
GCA_002813795.1	Bacteria	Proteobacteria	Gammaproteobacteria	Enterobacterales	Vibrionaceae	Vibrio	Vibrio anguillarum	Vibrio anguillarum (Listonella anguillarum)
GCA_002813815.1	Bacteria	Proteobacteria	Gammaproteobacteria	Enterobacterales	Vibrionaceae	Vibrio	Vibrio anguillarum	Vibrio anguillarum (Listonella anguillarum)
GCA_002813835.1	Bacteria	Proteobacteria	Gammaproteobacteria	Enterobacterales	Vibrionaceae	Vibrio	Vibrio anguillarum	Vibrio anguillarum (Listonella anguillarum)
GCA_002813855.1	Bacteria	Proteobacteria	Gammaproteobacteria	Enterobacterales	Vibrionaceae	Vibrio	Vibrio anguillarum	Vibrio anguillarum (Listonella anguillarum)
GCA_002814055.1	Bacteria	Bacteroidota	Bacteroidia	Flavobacteriales	Flavobacteriaceae	Polaribacter	Polaribacter reichenbachii	Polaribacter reichenbachii
GCA_002831605.1	Bacteria	Proteobacteria	Gammaproteobacteria	Enterobacterales	Alteromonadaceae	Alteromonas	Alteromonas hispanica	Alteromonas sp. MB-3u-76
GCA_002831625.1	Bacteria	Bacteroidota	Bacteroidia	Flavobacteriales	Flavobacteriaceae	Nonlabens	Nonlabens sp002831625	Nonlabens sp. MB-3u-79
GCA_002831645.1	Bacteria	Bacteroidota	Bacteroidia	Flavobacteriales	Flavobacteriaceae	Olleya	Olleya sp002831645	Olleya sp. Bg11-27
GCA_002831665.1	Bacteria	Bacteroidota	Bacteroidia	Flavobacteriales	Flavobacteriaceae	Lacinutrix	Lacinutrix sp002831665	Lacinutrix sp. Bg11-31
GCA_002831685.1	Bacteria	Bacteroidota	Bacteroidia	Flavobacteriales	Flavobacteriaceae	Polaribacter	Polaribacter sp002831685	Polaribacter sp. ALD11
GCA_002832675.1	Bacteria	Actinobacteriota	Actinomycetia	Streptomycetales	Streptomycetaceae	Streptomyces	Streptomyces sindenensis	Streptomyces sp. S063
GCA_002838205.1	Bacteria	Firmicutes	Bacilli	Acholeplasmatales	Acholeplasmataceae	MZ-XQ	MZ-XQ sp002838205	Tenericutes bacterium MZ-XQ
GCA_002838765.1	Bacteria	Proteobacteria	Gammaproteobacteria	Enterobacterales	Kangiellaceae	Kangiella	Kangiella profundi	Kangiella profundi
GCA_002844375.1	Bacteria	Proteobacteria	Alphaproteobacteria	Rhodospirillales	Thalassospiraceae	Thalassospira	Thalassospira marina	Thalassospira marina
GCA_002847285.1	Bacteria	Actinobacteriota	Actinomycetia	Streptomycetales	Streptomycetaceae	Streptomyces	Streptomyces sp002847285	Streptomyces sp. CMB-StM0423
GCA_002847305.1	Bacteria	Proteobacteria	Alphaproteobacteria	Rhodobacterales	Rhodobacteraceae	Paracoccus	Paracoccus sp002847305	Paracoccus tegillarcae
GCA_002886045.1	Bacteria	Bacteroidota	Bacteroidia	Flavobacteriales	Flavobacteriaceae	Flavivirga	Flavivirga eckloniae	Flavivirga eckloniae
GCA_002887615.1	Bacteria	Proteobacteria	Gammaproteobacteria	Enterobacterales	Vibrionaceae	Vibrio	Vibrio jasicida	Vibrio jasicida 090810c
GCA_002888685.1	Bacteria	Proteobacteria	Alphaproteobacteria	Rhodobacterales	Rhodobacteraceae	Phaeobacter	Phaeobacter inhibens	Phaeobacter inhibens
GCA_002891475.1	Bacteria	Proteobacteria	Gammaproteobacteria	Enterobacterales	Enterobacteriaceae	Morganella	Morganella morganii	Morganella morganii (Proteus morganii)
GCA_002891905.1	Bacteria	Proteobacteria	Alphaproteobacteria	Rhodobacterales	Rhodobacteraceae	Phaeobacter	Phaeobacter piscinae	Phaeobacter piscinae
GCA_002891925.1	Bacteria	Proteobacteria	Alphaproteobacteria	Rhodobacterales	Rhodobacteraceae	Phaeobacter	Phaeobacter piscinae	Phaeobacter piscinae
GCA_002891945.1	Bacteria	Proteobacteria	Alphaproteobacteria	Rhodobacterales	Rhodobacteraceae	Phaeobacter	Phaeobacter inhibens	Phaeobacter inhibens
GCA_002891965.1	Bacteria	Proteobacteria	Alphaproteobacteria	Rhodobacterales	Rhodobacteraceae	Phaeobacter	Phaeobacter inhibens	Phaeobacter inhibens
GCA_002891985.1	Bacteria	Proteobacteria	Alphaproteobacteria	Rhodobacterales	Rhodobacteraceae	Phaeobacter	Phaeobacter inhibens	Phaeobacter inhibens
GCA_002892005.1	Bacteria	Proteobacteria	Alphaproteobacteria	Rhodobacterales	Rhodobacteraceae	Phaeobacter	Phaeobacter inhibens	Phaeobacter inhibens
GCA_002892025.1	Bacteria	Proteobacteria	Alphaproteobacteria	Rhodobacterales	Rhodobacteraceae	Phaeobacter	Phaeobacter inhibens	Phaeobacter inhibens
GCA_002892045.1	Bacteria	Proteobacteria	Alphaproteobacteria	Rhodobacterales	Rhodobacteraceae	Phaeobacter	Phaeobacter inhibens	Phaeobacter inhibens
GCA_002892065.1	Bacteria	Proteobacteria	Alphaproteobacteria	Rhodobacterales	Rhodobacteraceae	Phaeobacter	Phaeobacter inhibens	Phaeobacter inhibens
GCA_002892085.1	Bacteria	Proteobacteria	Alphaproteobacteria	Rhodobacterales	Rhodobacteraceae	Phaeobacter	Phaeobacter inhibens	Phaeobacter inhibens
GCA_002892125.1	Bacteria	Proteobacteria	Alphaproteobacteria	Rhodobacterales	Rhodobacteraceae	Phaeobacter	Phaeobacter inhibens	Phaeobacter inhibens
GCA_002892145.1	Bacteria	Proteobacteria	Alphaproteobacteria	Rhodobacterales	Rhodobacteraceae	Phaeobacter	Phaeobacter inhibens	Phaeobacter inhibens
GCA_002892165.1	Bacteria	Proteobacteria	Alphaproteobacteria	Rhodobacterales	Rhodobacteraceae	Phaeobacter	Phaeobacter inhibens	Phaeobacter inhibens
GCA_002892185.1	Bacteria	Proteobacteria	Alphaproteobacteria	Rhodobacterales	Rhodobacteraceae	Phaeobacter	Phaeobacter inhibens	Phaeobacter inhibens
GCA_002892225.1	Bacteria	Proteobacteria	Alphaproteobacteria	Rhodobacterales	Rhodobacteraceae	Phaeobacter	Phaeobacter inhibens	Phaeobacter inhibens
GCA_002892245.1	Bacteria	Proteobacteria	Alphaproteobacteria	Rhodobacterales	Rhodobacteraceae	Phaeobacter	Phaeobacter piscinae	Phaeobacter piscinae
GCA_002892265.1	Bacteria	Proteobacteria	Alphaproteobacteria	Rhodobacterales	Rhodobacteraceae	Phaeobacter	Phaeobacter inhibens	Phaeobacter inhibens
GCA_002893765.1	Bacteria	Bacteroidota	Bacteroidia	Flavobacteriales	Flavobacteriaceae	Tamlana_A	Tamlana_A carrageenivorans	Tamlana carrageenivorans
GCA_002895405.1	Bacteria	Actinobacteriota	Actinomycetia	Mycobacteriales	Pseudonocardiaceae	Actinoalloteichus	Actinoalloteichus cyanogriseus	Actinoalloteichus sp. AHMU CJ021
GCA_002900385.1	Bacteria	Firmicutes	Bacilli	Lactobacillales	Streptococcaceae	Streptococcus	Streptococcus parauberis	Streptococcus parauberis
GCA_002906455.1	Bacteria	Proteobacteria	Gammaproteobacteria	Enterobacterales	Vibrionaceae	Vibrio	Vibrio campbellii	Vibrio campbellii
GCA_002906475.1	Bacteria	Proteobacteria	Gammaproteobacteria	Enterobacterales	Vibrionaceae	Vibrio	Vibrio campbellii	Vibrio campbellii
GCA_002906575.1	Archaea	Halobacteriota	Halobacteria	Halobacteriales	Haloferacaceae	Salinigranum	Salinigranum rubrum	Salinigranum rubrum
GCA_002945325.1	Archaea	Methanobacteriota_A	Methanococci	Methanococcales	Methanococcaceae	Methanococcus	Methanococcus maripaludis	Methanococcus maripaludis
GCA_002949085.1	Bacteria	Proteobacteria	Alphaproteobacteria	Rhizobiales	Devosiaceae	Devosia	Devosia indica	Devosia sp. I507
GCA_002950575.1	Bacteria	Actinobacteriota	Actinomycetia	Actinomycetales	Microbacteriaceae	Pontimonas	Pontimonas salivibrio	Pontimonas salivibrio
GCA_002952115.1	Bacteria	Proteobacteria	Gammaproteobacteria	Nitrosococcales	Methylophagaceae	Methylophaga	Methylophaga nitratireducenticrescens	Methylophaga nitratireducenticrescens
GCA_002953515.1	Bacteria	Proteobacteria	Gammaproteobacteria	Enterobacterales	Vibrionaceae	Vibrio	Vibrio alginolyticus	Vibrio alginolyticus
GCA_002953535.1	Bacteria	Proteobacteria	Gammaproteobacteria	Enterobacterales	Vibrionaceae	Vibrio	Vibrio alginolyticus	Vibrio alginolyticus
GCA_002954615.1	Bacteria	Proteobacteria	Gammaproteobacteria	Enterobacterales	Vibrionaceae	Photobacterium	Photobacterium angustum	Photobacterium angustum
GCA_002966125.1	Bacteria	Bacteroidota	Bacteroidia	Flavobacteriales	Flavobacteriaceae	Pukyongia	Pukyongia salina	Pukyongia salina
GCA_002968395.1	Bacteria	Proteobacteria	Gammaproteobacteria	Enterobacterales	Alteromonadaceae	Idiomarina	Idiomarina aquatica	Idiomarina sp. OT37-5b
GCA_002983865.1	Bacteria	Proteobacteria	Alphaproteobacteria	Rhodobacterales	Rhodobacteraceae	Roseobacter	Roseobacter denitrificans	Roseobacter denitrificans
GCA_003008555.1	Bacteria	Proteobacteria	Alphaproteobacteria	Rhodobacterales	Rhodobacteraceae	Pukyongiella	Pukyongiella litopenaei	Pukyongiella litopenaei
GCA_003024155.1	Bacteria	Bacteroidota	Bacteroidia	Flavobacteriales	Flavobacteriaceae	Gramella	Gramella fulva	Gramella fulva
GCA_003030345.1	Bacteria	Actinobacteriota	Actinomycetia	Mycobacteriales	Micromonosporaceae	Plantactinospora	Plantactinospora sp003030345	Plantactinospora sp. BC1
GCA_003030385.1	Bacteria	Actinobacteriota	Actinomycetia	Mycobacteriales	Micromonosporaceae	Plantactinospora	Plantactinospora sp003030345	Plantactinospora sp. BB1
GCA_003031205.1	Bacteria	Proteobacteria	Gammaproteobacteria	Enterobacterales	Vibrionaceae	Vibrio	Vibrio anguillarum	Vibrio anguillarum (Listonella anguillarum)
GCA_003032495.1	Bacteria	Proteobacteria	Gammaproteobacteria	Pseudomonadales	Halomonadaceae	Cobetia	Cobetia amphilecti	Halomonas sp. SF2003
GCA_003047105.1	Bacteria	Proteobacteria	Alphaproteobacteria	Rhodobacterales	Rhodobacteraceae	Celeribacter	Celeribacter baekdonensis_B	Celeribacter baekdonensis
GCA_003047225.1	Bacteria	Firmicutes	Bacilli	Bacillales	Bacillaceae_H	Priestia	Priestia megaterium	Bacillus sp. Y-01
GCA_003054475.1	Bacteria	Cyanobacteria	Cyanobacteriia	Cyanobacteriales	Nostocaceae	Nodularia	Nodularia spumigena	Nodularia spumigena UHCC 0039
GCA_003058465.1	Bacteria	Proteobacteria	Gammaproteobacteria	Burkholderiales	Burkholderiaceae	Algicoccus	Algicoccus marinus	Orrella marina
GCA_003060805.1	Bacteria	Cyanobacteria	Cyanobacteriia	Cyanobacteriales	Microcoleaceae	Limnospira	Limnospira fusiformis	Arthrospira sp. TJSD092
GCA_003060825.1	Bacteria	Firmicutes	Bacilli	Paenibacillales	Paenibacillaceae	Paenibacillus_A	Paenibacillus_A sp003060825	Paenibacillus sp. CAA11
GCA_003061515.1	Bacteria	Proteobacteria	Gammaproteobacteria	Enterobacterales	Alteromonadaceae	Cognaticolwellia	Cognaticolwellia sp003061515	Colwellia sp. Arc7-D
GCA_003063625.1	Bacteria	Proteobacteria	Gammaproteobacteria	Enterobacterales	Alteromonadaceae	Algibacillus	Algibacillus sp003063625	Saccharobesus litoralis
GCA_003063885.1	Bacteria	Proteobacteria	Gammaproteobacteria	Enterobacterales	Vibrionaceae	Vibrio	Vibrio cholerae	Vibrio cholerae
GCA_003071365.1	Bacteria	Proteobacteria	Alphaproteobacteria	Rhizobiales	Methyloligellaceae	Methyloceanibacter	Methyloceanibacter sp003071365	Methyloceanibacter sp. wino2
GCA_003072645.1	Bacteria	Proteobacteria	Gammaproteobacteria	Enterobacterales	Aeromonadaceae	Dongshaea	Dongshaea marina	Dongshaea marina
GCA_003074055.1	Bacteria	Actinobacteriota	Actinomycetia	Streptomycetales	Streptomycetaceae	Streptomyces	Streptomyces nigra	Streptomyces nigra
GCA_003076275.1	Bacteria	Proteobacteria	Gammaproteobacteria	Pseudomonadales	Cellvibrionaceae	Microbulbifer	Microbulbifer sp003076275	Microbulbifer sp. A4B17
GCA_003076895.1	Bacteria	Proteobacteria	Gammaproteobacteria	Enterobacterales	Vibrionaceae	Vibrio	Vibrio parahaemolyticus	Vibrio parahaemolyticus
GCA_003085735.1	Bacteria	Proteobacteria	Gammaproteobacteria	Enterobacterales	Vibrionaceae	Vibrio	Vibrio parahaemolyticus	Vibrio parahaemolyticus
GCA_003095655.1	Bacteria	Bacteroidota	Bacteroidia	Flavobacteriales	Flavobacteriaceae	Dokdonia	Dokdonia sp003095655	Dokdonia sp. Dokd-P16
GCA_003097515.1	Bacteria	Actinobacteriota	Actinomycetia	Streptomycetales	Streptomycetaceae	Streptomyces	Streptomyces tirandamycinicus	Streptomyces tirandamycinicus
GCA_003111685.1	Bacteria	Proteobacteria	Alphaproteobacteria	Rhodobacterales	Rhodobacteraceae	Salipiger	Salipiger pacificus_A	Yangia pacifica
GCA_003119375.1	Bacteria	Proteobacteria	Gammaproteobacteria	Enterobacterales	Vibrionaceae	Vibrio	Vibrio parahaemolyticus	Vibrio parahaemolyticus
GCA_003122365.1	Bacteria	Actinobacteriota	Actinomycetia	Streptomycetales	Streptomycetaceae	Streptomyces	Streptomyces spongiicola	Streptomyces spongiicola
GCA_003130755.1	Bacteria	Proteobacteria	Gammaproteobacteria	Enterobacterales	Vibrionaceae	Photobacterium	Photobacterium damselae	Photobacterium damselae
GCA_003143555.1	Bacteria	Proteobacteria	Gammaproteobacteria	Enterobacterales	Alteromonadaceae	Saliniradius	Saliniradius amylolyticus	Saliniradius amylolyticus
GCA_003148385.1	Bacteria	Bacteroidota	Bacteroidia	Flavobacteriales	Flavobacteriaceae	Flavobacterium	Flavobacterium sediminis	Flavobacterium sediminis
GCA_003186145.1	Bacteria	Firmicutes	Bacilli	Lactobacillales	Streptococcaceae	Streptococcus	Streptococcus agalactiae	Streptococcus agalactiae
GCA_003209315.1	Bacteria	Proteobacteria	Gammaproteobacteria	Pseudomonadales	Moraxellaceae	Psychrobacter	Psychrobacter sanguinis_A	Psychrobacter sp. YP14
GCA_003226295.1	Bacteria	Verrucomicrobiota	Verrucomicrobiae	Opitutales	UBA2987	Moanabacter	Moanabacter tarae	Candidatus Moanabacter tarae (marine metagenome)
GCA_003233695.1	Bacteria	Proteobacteria	Gammaproteobacteria	Xanthomonadales	Xanthomonadaceae	Lysobacter	Lysobacter maris	Lysobacter maris
GCA_003258315.1	Bacteria	Myxococcota	Bradymonadia	Bradymonadales	Bradymonadaceae	Bradymonas	Bradymonas sediminis	Bradymonas sediminis
GCA_003258705.1	Bacteria	Bacteroidota	Bacteroidia	Cytophagales	Spirosomaceae	Arcticibacterium	Arcticibacterium luteifluviistationis	Arcticibacterium luteifluviistationis
GCA_003260975.1	Bacteria	Bacteroidota	Bacteroidia	Cytophagales	Cyclobacteriaceae	Echinicola	Echinicola strongylocentroti	Echinicola strongylocentroti
GCA_003264115.1	Bacteria	Proteobacteria	Alphaproteobacteria	Sphingomonadales	Sphingomonadaceae	Erythrobacter	Erythrobacter sp003264115	Erythrobacter sp. KY5
GCA_003265285.1	Bacteria	Firmicutes	Bacilli	Bacillales	Bacillaceae	Bacillus	Bacillus subtilis	Bacillus subtilis subsp. subtilis
GCA_003269425.1	Bacteria	Bacteroidota	Bacteroidia	Flavobacteriales	Flavobacteriaceae	Muricauda	Muricauda maritima	Muricauda aurantiaca
GCA_003285105.1	Bacteria	Bacteroidota	Rhodothermia	Rhodothermales	MEBIC09517	MEBICO9517	MEBICO9517 sp003285105	Roseithermus sacchariphilus
GCA_003288315.1	Bacteria	Proteobacteria	Alphaproteobacteria	Rhodobacterales	Rhodobacteraceae	Roseovarius	Roseovarius mucosus_A	Roseovarius sp. AK1035
GCA_003290325.1	Bacteria	Bacteroidota	Rhodothermia	Rhodothermales	Salinibacteraceae	Salinibacter	Salinibacter ruber	Salinibacter ruber
GCA_003290445.1	Bacteria	Proteobacteria	Gammaproteobacteria	Francisellales	Francisellaceae	Francisella_A	Francisella_A adeliensis	Francisella adeliensis
GCA_003293715.1	Bacteria	Proteobacteria	Gammaproteobacteria	Burkholderiales	Burkholderiaceae	Pseudoduganella	Pseudoduganella haloabium	Massilia sp. YMA4
GCA_003312585.1	Bacteria	Proteobacteria	Gammaproteobacteria	Enterobacterales	Vibrionaceae	Vibrio	Vibrio campbellii	Vibrio campbellii
GCA_003312875.1	Bacteria	Actinobacteriota	Actinomycetia	Mycobacteriales	Pseudonocardiaceae	Amycolatopsis	Amycolatopsis albispora	Amycolatopsis albispora
GCA_003312895.1	Bacteria	Firmicutes	Bacilli	Bacillales	Bacillaceae	Bacillus	Bacillus velezensis	Bacillus amyloliquefaciens
GCA_003324735.1	Bacteria	Firmicutes	Bacilli	Bacillales	Bacillaceae	Bacillus	Bacillus subtilis	Bacillus spizizenii
GCA_003325475.1	Bacteria	Proteobacteria	Gammaproteobacteria	Burkholderiales	Chromobacteriaceae	Chromobacterium	Chromobacterium phragmitis	Chromobacterium phragmitis
GCA_003325495.1	Bacteria	Proteobacteria	Gammaproteobacteria	Burkholderiales	Chromobacteriaceae	Chromobacterium	Chromobacterium phragmitis	Chromobacterium phragmitis
GCA_003326015.1	Bacteria	Proteobacteria	Gammaproteobacteria	PS1	Thioglobaceae	Pseudothioglobus	Pseudothioglobus singularis_A	Candidatus Thioglobus sp. NP1
GCA_003330885.1	Bacteria	Proteobacteria	Alphaproteobacteria	Parvibaculales	Parvibaculaceae	Mf105b01	Mf105b01 sp003330885	Rhodobiaceae bacterium
GCA_003330945.1	Bacteria	Proteobacteria	Gammaproteobacteria	Enterobacterales	Enterobacteriaceae	Klebsiella	Klebsiella pneumoniae	Klebsiella pneumoniae subsp. pneumoniae
GCA_003332325.1	Bacteria	Firmicutes	Bacilli	Mycoplasmatales	Metamycoplasmataceae	Metamycoplasma	Metamycoplasma phocidae	[Mycoplasma] phocidae (Metamycoplasma phocae)
GCA_003342675.1	Archaea	Halobacteriota	Halobacteria	Halobacteriales	Haloferacaceae	Haloplanus	Haloplanus rubicundus	Haloplanus rubicundus
GCA_003344865.1	Bacteria	Actinobacteriota	Actinomycetia	Euzebyales	Euzebyaceae	Euzebya	Euzebya sp003344865	Euzebya pacifica
GCA_003344885.1	Bacteria	Proteobacteria	Alphaproteobacteria	Sphingomonadales	Sphingomonadaceae	ZODW24	ZODW24 sp003344885	Altererythrobacter sp. ZODW24
GCA_003344925.1	Bacteria	Bacteroidota	Bacteroidia	Flavobacteriales	Flavobacteriaceae	Flavobacterium	Flavobacterium arcticum	Flavobacterium arcticum
GCA_003345275.1	Bacteria	Firmicutes	Bacilli	Lactobacillales	Enterococcaceae	Enterococcus	Enterococcus faecalis	Enterococcus faecalis
GCA_003346755.1	Bacteria	Campylobacterota	Campylobacteria	Campylobacterales	Arcobacteraceae	Malaciobacter	Malaciobacter halophilus	Malaciobacter halophilus (Arcobacter halophilus)
GCA_003346775.1	Bacteria	Campylobacterota	Campylobacteria	Campylobacterales	Arcobacteraceae	Malaciobacter	Malaciobacter mytili	Malaciobacter mytili LMG 24559
GCA_003346815.1	Bacteria	Campylobacterota	Campylobacteria	Campylobacterales	Arcobacteraceae	Halarcobacter	Halarcobacter bivalviorum	Halarcobacter bivalviorum (Arcobacter bivalviorum)
GCA_003351365.1	Bacteria	Actinobacteriota	Actinomycetia	Mycobacteriales	Micromonosporaceae	Micromonospora	Micromonospora aurantiaca	Micromonospora aurantiaca
GCA_003351865.1	Archaea	Methanobacteriota_A	Methanococci	Methanococcales	Methanococcaceae	Methanofervidicoccus	Methanofervidicoccus sp003351865	Methanofervidicoccus sp. A16
GCA_003352045.1	Bacteria	Proteobacteria	Alphaproteobacteria	Rhodobacterales	Rhodobacteraceae	JL08	JL08 sp003352045	Sulfitobacter sp. JL08
GCA_003352065.1	Bacteria	Proteobacteria	Alphaproteobacteria	Rhodobacterales	Rhodobacteraceae	Sulfitobacter	Sulfitobacter sp003352065	Sulfitobacter sp. SK011
GCA_003352465.1	Bacteria	Bacteroidota	Bacteroidia	Flavobacteriales	Flavobacteriaceae	Kordia	Kordia sp003352465	Kordia sp. SMS9
GCA_003354245.1	Bacteria	Proteobacteria	Gammaproteobacteria	Enterobacterales	Enterobacteriaceae	Edwardsiella	Edwardsiella piscicida	Edwardsiella tarda
GCA_003355455.1	Bacteria	Proteobacteria	Alphaproteobacteria	Sphingomonadales	Sphingomonadaceae	Qipengyuania	Qipengyuania aurea	Erythrobacter aureus
GCA_003367315.1	Bacteria	Proteobacteria	Gammaproteobacteria	Pseudomonadales	Natronospirillaceae	Saccharospirillum	Saccharospirillum mangrovi	Saccharospirillum mangrovi
GCA_003367375.1	Bacteria	Proteobacteria	Gammaproteobacteria	Enterobacterales	Gallaecimonadaceae	Gallaecimonas	Gallaecimonas mangrovi	Gallaecimonas mangrovi
GCA_003391255.1	Bacteria	Proteobacteria	Gammaproteobacteria	Pseudomonadales	Pseudomonadaceae	Pseudomonas_E	Pseudomonas_E plecoglossicida	Pseudomonas plecoglossicida
GCA_003391375.1	Bacteria	Proteobacteria	Gammaproteobacteria	Enterobacterales	Vibrionaceae	Vibrio	Vibrio coralliilyticus	Vibrio coralliilyticus
GCA_003403095.1	Bacteria	Proteobacteria	Alphaproteobacteria	Rhodospirillales	Thalassospiraceae	Thalassospira	Thalassospira indica	Thalassospira indica
GCA_003410255.1	Bacteria	Firmicutes	Bacilli	Bacillales	Bacillaceae_G	Bacillus_A	Bacillus_A anthracis	Bacillus anthracis
GCA_003410315.1	Bacteria	Bacteroidota	Bacteroidia	Flavobacteriales	Flavobacteriaceae	Olleya	Olleya sediminilitoris	Olleya aquimaris
GCA_003410355.1	Bacteria	Firmicutes	Bacilli	Bacillales	Bacillaceae_G	Bacillus_A	Bacillus_A anthracis	Bacillus anthracis
GCA_003429285.1	Bacteria	Proteobacteria	Gammaproteobacteria	Enterobacterales	Alteromonadaceae	Alteromonas	Alteromonas sediminis	Salinimonas sediminis
GCA_003429305.1	Bacteria	Proteobacteria	Gammaproteobacteria	Enterobacterales	Alteromonadaceae	Pseudoalteromonas	Pseudoalteromonas piscicida_A	Pseudoalteromonas piscicida
GCA_003429325.1	Bacteria	Proteobacteria	Gammaproteobacteria	Enterobacterales	Alteromonadaceae	Pseudoalteromonas	Pseudoalteromonas piscicida_A	Pseudoalteromonas piscicida
GCA_003433515.1	Bacteria	Proteobacteria	Alphaproteobacteria	Rhizobiales	Devosiaceae	Maritalea	Maritalea myrionectae	Maritalea myrionectae
GCA_003441595.1	Bacteria	Proteobacteria	Gammaproteobacteria	Pseudomonadales	Oleiphilaceae	Marinobacter	Marinobacter sp003441595	Marinobacter sp. Arc7-DN-1
GCA_003443535.1	Bacteria	Proteobacteria	Alphaproteobacteria	Rhodobacterales	Rhodobacteraceae	Ruegeria	Ruegeria sp003443535	Ruegeria sp. AD91A
GCA_003443555.1	Bacteria	Proteobacteria	Alphaproteobacteria	Rhodobacterales	Rhodobacteraceae	Phaeobacter	Phaeobacter inhibens	Phaeobacter inhibens
GCA_003443575.1	Bacteria	Proteobacteria	Alphaproteobacteria	Rhodobacterales	Rhodobacteraceae	Phaeobacter	Phaeobacter inhibens	Phaeobacter inhibens
GCA_003443595.1	Bacteria	Proteobacteria	Alphaproteobacteria	Rhodobacterales	Rhodobacteraceae	Phaeobacter	Phaeobacter piscinae	Phaeobacter sp. LSS9
GCA_003443615.1	Bacteria	Proteobacteria	Gammaproteobacteria	Enterobacterales	Alteromonadaceae	Alteromonas	Alteromonas sp003443615	Alteromonas sp. BL110
GCA_003443635.1	Bacteria	Bacteroidota	Bacteroidia	Flavobacteriales	Flavobacteriaceae	AU392	AU392 sp003443635	Flavobacteriaceae bacterium
GCA_003443675.1	Bacteria	Bacteroidota	Bacteroidia	Flavobacteriales	Flavobacteriaceae	Aquimarina	Aquimarina sp003443675	Aquimarina sp. BL5
GCA_003443695.1	Bacteria	Bacteroidota	Bacteroidia	Flavobacteriales	Flavobacteriaceae	Aquimarina	Aquimarina latercula	Aquimarina sp. AD1
GCA_003443715.1	Bacteria	Bacteroidota	Bacteroidia	Flavobacteriales	Flavobacteriaceae	Aquimarina	Aquimarina aggregata	Aquimarina sp. AD10
GCA_003443735.1	Bacteria	Actinobacteriota	Actinomycetia	Streptomycetales	Streptomycetaceae	Streptomyces	Streptomyces sviceus	Streptomyces sp. CC0208
GCA_003443775.1	Bacteria	Proteobacteria	Gammaproteobacteria	Enterobacterales	Vibrionaceae	Vibrio	Vibrio natriegens	Vibrio sp. dhg
GCA_003443875.1	Bacteria	Actinobacteriota	Actinomycetia	Propionibacteriales	Nocardioidaceae	Aeromicrobium	Aeromicrobium sp003443875	Aeromicrobium sp. A1-2
GCA_003491185.1	Bacteria	Bacteroidota	Rhodothermia	Rhodothermales	Salinibacteraceae	Salinibacter	Salinibacter ruber	Salinibacter ruber
GCA_003491205.1	Bacteria	Bacteroidota	Rhodothermia	Rhodothermales	Salinibacteraceae	Salinibacter	Salinibacter ruber	Salinibacter ruber
GCA_003491385.1	Bacteria	Bacteroidota	Rhodothermia	Rhodothermales	Salinibacteraceae	Salinibacter	Salinibacter ruber	Salinibacter ruber
GCA_003491405.1	Bacteria	Bacteroidota	Rhodothermia	Rhodothermales	Salinibacteraceae	Salinibacter	Salinibacter ruber	Salinibacter ruber
GCA_003491425.1	Bacteria	Bacteroidota	Rhodothermia	Rhodothermales	Salinibacteraceae	Salinibacter	Salinibacter ruber	Salinibacter ruber
GCA_003515105.1	Bacteria	Proteobacteria	Gammaproteobacteria	Enterobacterales	Alteromonadaceae	Pseudoalteromonas	Pseudoalteromonas lipolytica	Pseudoalteromonas donghaensis
GCA_003516165.1	Bacteria	Proteobacteria	Gammaproteobacteria	Enterobacterales	Enterobacteriaceae	Serratia	Serratia nematodiphila	Serratia marcescens
GCA_003516185.1	Bacteria	Proteobacteria	Gammaproteobacteria	Enterobacterales	Enterobacteriaceae	Serratia	Serratia nematodiphila	Serratia marcescens
GCA_003522555.1	Bacteria	Proteobacteria	Gammaproteobacteria	Enterobacterales	Vibrionaceae	Vibrio	Vibrio vulnificus	Vibrio vulnificus
GCA_003544855.1	Bacteria	Campylobacterota	Campylobacteria	Campylobacterales	Arcobacteraceae	Malaciobacter	Malaciobacter marinus	Malaciobacter marinus (Arcobacter marinus)
GCA_003544875.1	Bacteria	Proteobacteria	Gammaproteobacteria	Enterobacterales	Vibrionaceae	Vibrio	Vibrio alfacsensis	Vibrio alfacsensis
GCA_003544895.1	Bacteria	Proteobacteria	Alphaproteobacteria	Rhodobacterales	Rhodobacteraceae	Profundibacter	Profundibacter amoris	Profundibacter amoris
GCA_003544915.1	Bacteria	Campylobacterota	Campylobacteria	Campylobacterales	Arcobacteraceae	Aliarcobacter	Aliarcobacter ellisii	Arcobacter ellisii
GCA_003544935.1	Bacteria	Campylobacterota	Campylobacteria	Campylobacterales	Arcobacteraceae	Malaciobacter	Malaciobacter molluscorum	Malaciobacter molluscorum LMG 25693
GCA_003568825.1	Bacteria	Proteobacteria	Gammaproteobacteria	Enterobacterales	Alteromonadaceae	Pseudoalteromonas	Pseudoalteromonas tunicata	Pseudoalteromonas tunicata
GCA_003568845.1	Bacteria	Proteobacteria	Alphaproteobacteria	Azospirillales	Azospirillaceae	Indioceanicola	Indioceanicola profundi	Indioceanicola profundi
GCA_003568865.1	Bacteria	Actinobacteriota	Rubrobacteria	Rubrobacterales	Rubrobacteraceae	Rubrobacter	Rubrobacter indicoceani	Rubrobacter indicoceani
GCA_003569745.1	Bacteria	Proteobacteria	Alphaproteobacteria	Sphingomonadales	Sphingomonadaceae	Croceibacterium	Croceibacterium sp003569745	Altererythrobacter sp. B11
GCA_003577525.1	Bacteria	Proteobacteria	Gammaproteobacteria	Oceanospirillales	Alcanivoracaceae	Alcanivorax		Alcanivorax sp. E4
GCA_003584565.2	Bacteria	Proteobacteria	Gammaproteobacteria	Enterobacterales	Alteromonadaceae	Alteromonas	Alteromonas sp002729795	Alteromonas sp. RKMC-009
GCA_003584645.1	Bacteria	Proteobacteria	Gammaproteobacteria	Methylococcales	Methylococcaceae	Methylocaldum	Methylocaldum marinum	Methylocaldum marinum
GCA_003584745.1	Bacteria	Actinobacteriota	Actinomycetia	Mycobacteriales	Mycobacteriaceae	Mycobacterium	Mycobacterium marinum	Mycobacterium pseudoshottsii JCM 15466
GCA_003585765.1	Bacteria	Bacteroidota	Bacteroidia	Cytophagales	Hymenobacteraceae	Pontibacter	Pontibacter actiniarum	Pontibacter actiniarum
GCA_003611275.1	Bacteria	Proteobacteria	Alphaproteobacteria	Rhodobacterales	Rhodobacteraceae	Sulfitobacter	Sulfitobacter sp001634775	Sulfitobacter sp. D7
GCA_003612775.1	Bacteria	Actinobacteriota	Actinomycetia	Mycobacteriales	Micromonosporaceae	Micromonospora	Micromonospora tulbaghiae	Micromonospora tulbaghiae
GCA_003612895.1	Bacteria	Bdellovibrionota	Bacteriovoracia	Bacteriovoracales	Bacteriovoracaceae	DB6-IX	DB6-IX sp003612895	Halobacteriovorax sp. BALOs_7
GCA_003626995.1	Bacteria	Proteobacteria	Gammaproteobacteria	Pseudomonadales	Pseudomonadaceae	Pseudomonas_E	Pseudomonas_E fluorescens_BA	Pseudomonas fluorescens
GCA_003668795.1	Bacteria	Proteobacteria	Gammaproteobacteria	Enterobacterales	Alteromonadaceae	Pseudoalteromonas	Pseudoalteromonas atlantica	Pseudoalteromonas agarivorans
GCA_003671915.1	Bacteria	Proteobacteria	Gammaproteobacteria	Burkholderiales	Burkholderiaceae	Alcaligenes	Alcaligenes aquatilis	Alcaligenes aquatilis
GCA_003687485.1	Bacteria	Bacteroidota	Bacteroidia	Flavobacteriales	Flavobacteriaceae	Euzebyella	Euzebyella marina	Euzebyella marina
GCA_003691485.1	Bacteria	Proteobacteria	Gammaproteobacteria	Enterobacterales	Vibrionaceae	Vibrio	Vibrio campbellii	Vibrio campbellii
GCA_003691505.1	Bacteria	Proteobacteria	Gammaproteobacteria	Enterobacterales	Vibrionaceae	Vibrio	Vibrio owensii	Vibrio owensii
GCA_003691525.1	Bacteria	Proteobacteria	Gammaproteobacteria	Enterobacterales	Vibrionaceae	Vibrio	Vibrio parahaemolyticus	Vibrio parahaemolyticus
GCA_003691545.1	Bacteria	Proteobacteria	Gammaproteobacteria	Enterobacterales	Vibrionaceae	Vibrio	Vibrio owensii	Vibrio owensii
GCA_003711085.1	Bacteria	Campylobacterota	Campylobacteria	Campylobacterales	Arcobacteraceae	Poseidonibacter	Poseidonibacter parvus	Arcobacter peruensis
GCA_003711265.1	Bacteria	Proteobacteria	Gammaproteobacteria	PS1	Thioglobaceae	Thiodubiliella	Thiodubiliella sp001875585	Bathymodiolus thermophilus thioautotrophic gill symbiont
GCA_003716855.1	Bacteria	Proteobacteria	Gammaproteobacteria	Burkholderiales	Burkholderiaceae	Alcaligenes	Alcaligenes aquatilis	Alcaligenes faecalis
GCA_003719615.1	Bacteria	Proteobacteria	Gammaproteobacteria	Enterobacterales	Enterobacteriaceae	Enterobacter	Enterobacter hormaechei_A	Enterobacter cloacae
GCA_003721455.1	Bacteria	Proteobacteria	Gammaproteobacteria	Enterobacterales	Shewanellaceae	Shewanella	Shewanella algae	Shewanella algae
GCA_003721495.1	Bacteria	Actinobacteriota	Actinomycetia	Streptomycetales	Streptomycetaceae	Streptomyces	Streptomyces goshikiensis	Streptomyces sp. ADI95-16
GCA_003722215.1	Bacteria	Firmicutes	Bacilli	Erysipelotrichales	Erysipelotrichaceae	Erysipelothrix	Erysipelothrix rhusiopathiae	Erysipelothrix rhusiopathiae
GCA_003726935.1	Bacteria	Proteobacteria	Gammaproteobacteria	Enterobacterales	Vibrionaceae	Vibrio	Vibrio mediterranei	Vibrio mediterranei
GCA_003846365.1	Bacteria	Proteobacteria	Alphaproteobacteria	Rhodobacterales	Rhodobacteraceae	Cereibacter_A	Cereibacter_A sphaeroides	Cereibacter sphaeroides
GCA_003846385.1	Bacteria	Proteobacteria	Alphaproteobacteria	Rhodobacterales	Rhodobacteraceae	Cereibacter_A	Cereibacter_A sphaeroides	Cereibacter sphaeroides
GCA_003846405.1	Bacteria	Proteobacteria	Alphaproteobacteria	Rhodobacterales	Rhodobacteraceae	Cereibacter_A	Cereibacter_A sphaeroides	Cereibacter sphaeroides
GCA_003846425.1	Bacteria	Proteobacteria	Alphaproteobacteria	Rhodobacterales	Rhodobacteraceae	Cereibacter_A	Cereibacter_A sphaeroides	Cereibacter sphaeroides
GCA_003850185.1	Bacteria	Proteobacteria	Gammaproteobacteria	Piscirickettsiales	Piscirickettsiaceae	Piscirickettsia	Piscirickettsia salmonis	Piscirickettsia salmonis
GCA_003855395.1	Bacteria	Proteobacteria	Gammaproteobacteria	Enterobacterales	Shewanellaceae	Shewanella	Shewanella livingstonensis	Shewanella livingstonensis
GCA_003856835.1	Archaea	Halobacteriota	Halobacteria	Halobacteriales	Haloferacaceae	Haloplanus	Haloplanus aerogenes	Haloplanus aerogenes
GCA_003867075.1	Bacteria	Bacteroidota	Bacteroidia	Flavobacteriales	Flavobacteriaceae	Tenacibaculum	Tenacibaculum mesophilum	Tenacibaculum mesophilum
GCA_003942025.1	Bacteria	Proteobacteria	Gammaproteobacteria	Enterobacterales	Vibrionaceae	Aliivibrio	Aliivibrio salmonicida_A	Aliivibrio salmonicida
GCA_003950215.1	Bacteria	Proteobacteria	Gammaproteobacteria	Pseudomonadales	Halomonadaceae	Halomonas	Halomonas venusta	Halomonas venusta
GCA_003952245.1	Bacteria	Proteobacteria	Gammaproteobacteria	Pseudomonadales	Pseudomonadaceae	Pseudomonas_E	Pseudomonas_E lactis	Pseudomonas libanensis
GCA_003966975.1	Bacteria	Chloroflexota	Anaerolineae	Anaerolineales	Anaerolineaceae	Pelolinea	Pelolinea submarina	Pelolinea submarina
GCA_003970715.1	Bacteria	Actinobacteriota	Actinomycetia	Streptomycetales	Streptomycetaceae	Streptomyces	Streptomyces abikoensis	Streptomyces luteoverticillatus
GCA_003970735.1	Bacteria	Proteobacteria	Alphaproteobacteria	Rhodobacterales	Rhodobacteraceae	Silicimonas	Silicimonas algicola	Silicimonas algicola
GCA_003986605.1	Bacteria	Proteobacteria	Gammaproteobacteria	Pseudomonadales	Oleiphilaceae	Marinobacter	Marinobacter salarius	Marinobacter salarius
GCA_003990725.1	Archaea	Euryarchaeota	Halobacteria	Haloferacales	Halorubraceae	Halorubrum		Halorubrum sp. PV6
GCA_003991075.1	Bacteria	Proteobacteria	Gammaproteobacteria	Thiomicrospirales	Thiomicrospiraceae	Hydrogenovibrio	Hydrogenovibrio thermophilus	Thiomicrospira sp. S5
GCA_003991135.1	Bacteria	Firmicutes_F	Halanaerobiia	DY22613	DY22613	Anoxybacter	Anoxybacter fermentans	Anoxybacter fermentans
GCA_004006315.1	Bacteria	Campylobacterota	Campylobacteria	Nautiliales	Nautiliaceae	Nautilia	Nautilia profundicola_A	Nautilia sp. PV-1
GCA_004014695.1	Bacteria	Proteobacteria	Gammaproteobacteria	Pseudomonadales	Oleiphilaceae	Hahella	Hahella sp004135205	Hahella sp. KA22
GCA_004014715.1	Bacteria	Proteobacteria	Gammaproteobacteria	Enterobacterales	Alteromonadaceae	Pseudoalteromonas	Pseudoalteromonas sp001282135	Pseudoalteromonas sp. R3
GCA_004022545.1	Bacteria	Proteobacteria	Gammaproteobacteria	Enterobacterales	Vibrionaceae	Vibrio	Vibrio chagasii_A	Vibrio chagasii
GCA_004028275.1	Bacteria	Proteobacteria	Gammaproteobacteria	Thiomicrospirales	Thiomicrospiraceae	Hydrogenovibrio	Hydrogenovibrio thermophilus	Hydrogenovibrio thermophilus
GCA_004114695.1	Bacteria	Proteobacteria	Alphaproteobacteria	Sphingomonadales	Sphingomonadaceae	Parerythrobacter	Parerythrobacter sp004114695	Erythrobacter sp. HKB08
GCA_004116975.1	Bacteria	Proteobacteria	Gammaproteobacteria	Enterobacterales	Enterobacteriaceae	Proteus	Proteus hauseri	Proteus hauseri
GCA_004116995.1	Bacteria	Firmicutes	Bacilli	Bacillales	Anoxybacillaceae	Anoxybacillus	Anoxybacillus flavithermus_G	Neobacillus thermocopriae
GCA_004117015.1	Bacteria	Actinobacteriota	Actinomycetia	Actinomycetales	Micrococcaceae	Micrococcus	Micrococcus luteus	Micrococcus luteus
GCA_004117035.1	Bacteria	Firmicutes	Bacilli	Staphylococcales	Staphylococcaceae	Staphylococcus	Staphylococcus warneri	Sulfitobacter donghicola
GCA_004123675.1	Bacteria	Proteobacteria	Alphaproteobacteria	Rhodobacterales	Rhodobacteraceae	Leisingera	Leisingera sp004123675	Leisingera sp. NJS204
GCA_004135205.1	Bacteria	Proteobacteria	Gammaproteobacteria	Pseudomonadales	Oleiphilaceae	Hahella	Hahella sp004135205	Hahella sp. KA22
GCA_004194515.1	Bacteria	Proteobacteria	Gammaproteobacteria	Enterobacterales	Vibrionaceae	Vibrio	Vibrio parahaemolyticus	Vibrio parahaemolyticus
GCA_004209775.1	Bacteria	Cyanobacteria	Cyanobacteriia	PCC-6307	Cyanobiaceae	Synechococcus_C	Synechococcus_C sp004209775	Synechococcus sp. WH 8101
GCA_004214795.1	Bacteria	Campylobacterota	Campylobacteria	Campylobacterales	Arcobacteraceae	Aliarcobacter	Aliarcobacter pacificus	Malaciobacter pacificus (Arcobacter pacificus)
GCA_004214895.1	Bacteria	Proteobacteria	Gammaproteobacteria	Pseudomonadales	Pseudomonadaceae	Pseudomonas_E	Pseudomonas_E sp004214895	Pseudomonas tructae
GCA_004293625.1	Bacteria	Proteobacteria	Gammaproteobacteria	Thiomicrospirales	Thiomicrospiraceae	Thiomicrorhabdus	Thiomicrorhabdus indica	Thiomicrorhabdus indica
GCA_004295345.1	Bacteria	Proteobacteria	Gammaproteobacteria	Enterobacterales	Shewanellaceae	Shewanella	Shewanella maritima	Shewanella maritima
GCA_004295485.1	Bacteria	Actinobacteriota	Actinomycetia	Actinomycetales	Dermatophilaceae	Janibacter	Janibacter limosus_A	Janibacter limosus
GCA_004295665.1	Bacteria	Proteobacteria	Gammaproteobacteria	Enterobacterales	Alteromonadaceae	Litorilituus	Litorilituus sediminis	Litorilituus sediminis
GCA_004296255.1	Bacteria	Proteobacteria	Alphaproteobacteria	Sphingomonadales	Sphingomonadaceae	Qipengyuania	Qipengyuania flava	Qipengyuania flava
GCA_004299845.1	Bacteria	Verrucomicrobiota	Kiritimatiellae	Kiritimatiellales	Pontiellaceae	Pontiella	Pontiella sp004299845	Verrucomicrobia bacterium S94
GCA_004319545.1	Bacteria	Desulfobacterota	Desulfobacteria	Desulfobacterales	Desulfobacteraceae	Desulfobacter	Desulfobacter hydrogenophilus	Desulfobacter hydrogenophilus
GCA_004323735.1	Bacteria	Actinobacteriota	Actinomycetia	Streptosporangiales	Streptosporangiaceae	Streptomonospora	Streptomonospora sp004323735	Streptomonospora litoralis
GCA_004328725.1	Bacteria	Firmicutes	Bacilli	Lactobacillales	Streptococcaceae	Lactococcus	Lactococcus garvieae	Lactococcus garvieae
GCA_004328865.1	Bacteria	Proteobacteria	Gammaproteobacteria	Enterobacterales	Alteromonadaceae	Pseudoalteromonas	Pseudoalteromonas carrageenovora	Pseudoalteromonas carrageenovora
GCA_004328925.1	Bacteria	Firmicutes	Bacilli	Bacillales	Bacillaceae	Bacillus	Bacillus subtilis	Bacillus subtilis subsp. subtilis
GCA_004331955.1	Bacteria	Proteobacteria	Alphaproteobacteria	Rhizobiales	Rhizobiaceae	Roseitalea	Roseitalea porphyridii	Roseitalea porphyridii
GCA_004353225.1	Bacteria	Proteobacteria	Gammaproteobacteria	Pseudomonadales	Oleiphilaceae	Marinobacter	Marinobacter sp004353225	Marinobacter sp. JH2
GCA_004358345.1	Bacteria	Proteobacteria	Gammaproteobacteria	Enterobacterales	Shewanellaceae	Parashewanella	Parashewanella spongiae	Parashewanella spongiae
GCA_004358445.1	Bacteria	Proteobacteria	Gammaproteobacteria	Enterobacterales	Shewanellaceae	Parashewanella	Parashewanella tropica	Parashewanella tropica
GCA_004367585.1	Bacteria	Firmicutes	Bacilli	Bacillales_A	Planococcaceae	Paenisporosarcina	Paenisporosarcina antarctica	Paenisporosarcina antarctica
GCA_004421105.1	Bacteria	Proteobacteria	Gammaproteobacteria	Nitrosococcales	Nitrosococcaceae	Nitrosococcus	Nitrosococcus wardiae	Nitrosococcus wardiae
GCA_004524875.1	Bacteria	Actinobacteriota	Actinomycetia	Streptomycetales	Streptomycetaceae	Streptomyces	Streptomyces papulosus	Streptomyces sp. S501
GCA_004535885.1	Bacteria	Proteobacteria	Alphaproteobacteria	Rhodobacterales	Rhodobacteraceae	Leisingera	Leisingera sp004123675	Leisingera sp. NJS201
GCA_004564075.1	Bacteria	Actinobacteriota	Actinomycetia	Actinomycetales	Microbacteriaceae	Microbacterium	Microbacterium sediminis	Microbacterium sediminis
GCA_004564135.1	Bacteria	Proteobacteria	Alphaproteobacteria	Rhodospirillales	Terasakiellaceae	Terasakiella	Terasakiella sp004564135	Terasakiella sp. SH-1
GCA_004684345.1	Bacteria	Proteobacteria	Gammaproteobacteria	Enterobacterales	Enterobacteriaceae	Citrobacter	Citrobacter tructae	Citrobacter tructae
GCA_004751985.1	Bacteria	Proteobacteria	Alphaproteobacteria	Rhodobacterales	Rhodobacteraceae	Rhodophyticola	Rhodophyticola sp004751985	Rhodophyticola sp. CCM32
GCA_004752005.1	Bacteria	Proteobacteria	Gammaproteobacteria	Enterobacterales	Alteromonadaceae	Thalassotalea_A	Thalassotalea_A sp004752005	Thalassotalea sp. HSM 43
GCA_004786015.1	Bacteria	Proteobacteria	Gammaproteobacteria	Thiomicrospirales	Thiomicrospiraceae	Hydrogenovibrio	Hydrogenovibrio crunogenus_B	Hydrogenovibrio crunogenus
GCA_004799665.1	Archaea	Halobacteriota	Halobacteria	Halobacteriales	Haloarculaceae	Halapricum	Halapricum salinum	Halapricum salinum
GCA_004799685.1	Archaea	Halobacteriota	Halobacteria	Halobacteriales	Haloferacaceae	Halobellus	Halobellus limi	Halobellus limi
GCA_004803875.1	Bacteria	Bacteroidota	Bacteroidia	Flavobacteriales	Flavobacteriaceae	Tenacibaculum	Tenacibaculum maritimum	Tenacibaculum maritimum
GCA_004843725.1	Bacteria	Bacteroidota	Bacteroidia	Flavobacteriales	Flavobacteriaceae	Olleya	Olleya sp004843725	Psychroserpens sp. NJDZ02
GCA_004851605.1	Bacteria	Proteobacteria	Gammaproteobacteria	Pseudomonadales	Oleiphilaceae	Hydrocarboniclastica	Hydrocarboniclastica marina	Hydrocarboniclastica marina
GCA_004916735.1	Bacteria	Proteobacteria	Gammaproteobacteria	Enterobacterales	Vibrionaceae	Salinivibrio	Salinivibrio proteolyticus	Salinivibrio sp. YCSC6
GCA_005083985.2	Bacteria	Campylobacterota	Campylobacteria	Nautiliales	Nautiliaceae	Cetia	Cetia pacifica	Caminibacter pacificus
GCA_005144905.1	Bacteria	Proteobacteria	Gammaproteobacteria	Enterobacterales	Vibrionaceae	Vibrio	Vibrio cyclitrophicus	Vibrio cyclitrophicus
GCA_005222225.1	Bacteria	Proteobacteria	Gammaproteobacteria	Enterobacterales	Alteromonadaceae	Alteromonas	Alteromonas lutimaris	Salinimonas lutimaris
GCA_005222245.1	Bacteria	Proteobacteria	Gammaproteobacteria	Pseudomonadales	Marinomonadaceae	Marinomonas	Marinomonas alcarazii	Marinomonas sp. FW-1
GCA_005234075.1	Bacteria	Proteobacteria	Gammaproteobacteria	Enterobacterales	Shewanellaceae	Shewanella	Shewanella polaris	Shewanella sp. MEBiC00475
GCA_005234095.1	Bacteria	Firmicutes	Bacilli	Bacillales	Bacillaceae	Bacillus	Bacillus subtilis	Bacillus subtilis
GCA_005239365.1	Bacteria	Proteobacteria	Gammaproteobacteria	Enterobacterales	Vibrionaceae	Vibrio	Vibrio alginolyticus	Vibrio neocaledonicus
GCA_005281475.1	Bacteria	Bacteroidota	Bacteroidia	Cytophagales	Cyclobacteriaceae	Echinicola	Echinicola rosea	Echinicola rosea
GCA_005377625.1	Bacteria	Desulfobacterota	Syntrophobacteria	Syntrophobacterales	DSM-9756	Desulfoglaeba	Desulfoglaeba alkanexedens	Desulfoglaeba alkanexedens ALDC
GCA_005577135.1	Bacteria	Cyanobacteria	Cyanobacteriia	Cyanobacteriales	Cyanobacteriaceae	Limnothrix	Limnothrix sp001693275	Synechococcus sp. PCC 11901
GCA_005577315.1	Bacteria	Firmicutes	Bacilli	Bacillales	Bacillaceae_H	Priestia	Priestia flexa	Priestia flexa
GCA_005577435.1	Bacteria	Firmicutes	Bacilli	Paenibacillales	Paenibacillaceae	Paenibacillus	Paenibacillus sp005577435	Paenibacillus algicola
GCA_005671335.1	Bacteria	Firmicutes	Bacilli	Bacillales_H	Bacillaceae_D	Bacillus_M	Bacillus_M halodurans	Halalkalibacterium halodurans
GCA_005843885.1	Bacteria	Proteobacteria	Gammaproteobacteria	Enterobacterales	Enterobacteriaceae	Escherichia	Escherichia sp005843885	Escherichia sp. E4742
GCA_005849285.1	Bacteria	Proteobacteria	Alphaproteobacteria	Sphingomonadales	Emcibacteraceae	Luteithermobacter	Luteithermobacter gelatinilyticus	Luteithermobacter gelatinilyticus
GCA_005877035.1	Bacteria	Proteobacteria	Gammaproteobacteria	Enterobacterales	Alteromonadaceae	Pseudoalteromonas	Pseudoalteromonas distincta	Pseudoalteromonas distincta
GCA_005885815.1	Bacteria	Proteobacteria	Gammaproteobacteria	Thiomicrospirales	Thiomicrospiraceae	Thiomicrorhabdus	Thiomicrorhabdus sediminis	Thiomicrorhabdus sediminis
GCA_005954665.1	Bacteria	Proteobacteria	Gammaproteobacteria	Xanthomonadales	Xanthomonadaceae	Lysobacter	Lysobacter enzymogenes_B	Lysobacter enzymogenes
GCA_005960665.1	Bacteria	Firmicutes	Bacilli	Exiguobacterales	Exiguobacteraceae	Exiguobacterium	Exiguobacterium mexicanum	Exiguobacterium mexicanum
GCA_006007905.1	Bacteria	Firmicutes	Bacilli	Bacillales	Bacillaceae	Bacillus	Bacillus altitudinis	Bacillus altitudinis (Bacillus invictae)
GCA_006064855.1	Bacteria	Proteobacteria	Alphaproteobacteria	Rhodobacterales	Rhodobacteraceae	Sulfitobacter	Sulfitobacter sp006064855	Sulfitobacter sp. BSw21498
GCA_006065315.1	Bacteria	Bacteroidota	Bacteroidia	Flavobacteriales	Flavobacteriaceae	Aureibaculum	Aureibaculum sp006065315	Flavobacteriaceae bacterium 10Alg115
GCA_006228385.1	Bacteria	Proteobacteria	Gammaproteobacteria	Enterobacterales	Alteromonadaceae	Alteromonas	Alteromonas iocasae	Salinimonas iocasae
GCA_006274605.1	Archaea	Methanobacteriota_B	Thermococci	Thermococcales	Thermococcaceae	Thermococcus	Thermococcus indicus	Thermococcus indicus
GCA_006337125.1	Bacteria	Actinobacteriota	Actinomycetia	Actinomycetales	Dermatophilaceae	Serinicoccus	Serinicoccus chungangensis	Serinicoccus chungangensis
GCA_006351965.1	Bacteria	Proteobacteria	Alphaproteobacteria	Rhodobacterales	Rhodobacteraceae	Vannielia	Vannielia sp006351965	Oceanicola sp. D3
GCA_006385015.1	Bacteria	Actinobacteriota	Actinomycetia	Actinomycetales	Brevibacteriaceae	Brevibacterium	Brevibacterium sediminis	Brevibacterium linens
GCA_006385135.1	Bacteria	Proteobacteria	Alphaproteobacteria	Sphingomonadales	Emcibacteraceae	Paremcibacter	Paremcibacter congregatus	Paremcibacter congregatus
GCA_006385555.1	Bacteria	Proteobacteria	Gammaproteobacteria	Enterobacterales	Shewanellaceae	Shewanella	Shewanella polaris	Shewanella polaris
GCA_006459125.1	Bacteria	Campylobacterota	Campylobacteria	Campylobacterales	Arcobacteraceae	Halarcobacter	Halarcobacter anaerophilus	Halarcobacter anaerophilus
GCA_006494715.1	Bacteria	Proteobacteria	Gammaproteobacteria	Enterobacterales	Shewanellaceae	Shewanella	Shewanella sp006494715	Shewanella sp. SNU WT4
GCA_006494755.1	Bacteria	Proteobacteria	Gammaproteobacteria	Enterobacterales	Shewanellaceae	Shewanella	Shewanella marisflavi	Shewanella marisflavi
GCA_006517095.1	Bacteria	Proteobacteria	Gammaproteobacteria	Enterobacterales	Alteromonadaceae	Alteromonas	Alteromonas mediterranea	Alteromonas mediterranea
GCA_006517115.1	Bacteria	Proteobacteria	Gammaproteobacteria	Enterobacterales	Alteromonadaceae	Alteromonas	Alteromonas mediterranea	Alteromonas mediterranea
GCA_006517175.1	Bacteria	Myxococcota	Bradymonadia	Bradymonadales	Bradymonadaceae	Persicimonas	Persicimonas caeni	Persicimonas caeni
GCA_006517255.1	Bacteria	Proteobacteria	Gammaproteobacteria	Burkholderiales	Burkholderiaceae	Janthinobacterium	Janthinobacterium tructae	Janthinobacterium tructae
GCA_006517275.1	Bacteria	Proteobacteria	Alphaproteobacteria	Rhizobiales	Stappiaceae	Roseibium	Roseibium sp006517275	Labrenzia sp. PHM005
GCA_006542315.2	Bacteria	Proteobacteria	Gammaproteobacteria	Pseudomonadales	Halomonadaceae	Halomonas	Halomonas titanicae	Halomonas titanicae
GCA_006542605.1	Bacteria	Proteobacteria	Alphaproteobacteria	Sphingomonadales	Sphingomonadaceae	Erythrobacter	Erythrobacter sp006542605	Porphyrobacter sp. YT40
GCA_006547145.1	Bacteria	Actinobacteriota	Actinomycetia	Streptosporangiales	Streptosporangiaceae	Spirillospora	Spirillospora sp006547145	Actinomadura sp. WMMA1423
GCA_006738865.1	Bacteria	Proteobacteria	Alphaproteobacteria	ATCC43930	Stellaceae	Stella	Stella sp006738865	Stella sp. ATCC 35155 (Stella aquatica)
GCA_006740685.1	Archaea	Thermoproteota	Nitrososphaeria	Nitrososphaerales	Nitrosopumilaceae	Nitrosopumilus	Nitrosopumilus sp006740685	Candidatus Nitrosopumilus sp. SW
GCA_006965565.1	Bacteria	Proteobacteria	Gammaproteobacteria	Pseudomonadales	Moraxellaceae	Acinetobacter	Acinetobacter kanungonis	Acinetobacter tandoii
GCA_006969385.1	Bacteria	Planctomycetota	Phycisphaerae	UBA1845	UTPLA1	ECT2AJA-110-A	ECT2AJA-110-A sp006969385	Planctomycetaceae bacterium (algae metagenome)
GCA_006969625.1	Bacteria	Proteobacteria	Alphaproteobacteria	Kiloniellales	DSM-21159	Algihabitans	Algihabitans sp006969625	Rhodospirillaceae bacterium (algae metagenome)
GCA_006969745.1	Bacteria	Bacteroidota	Bacteroidia	Cytophagales	Cyclobacteriaceae	Ekhidna	Ekhidna sp006969745	Cytophagaceae bacterium (algae metagenome)
GCA_006969905.1	Bacteria	Bacteroidota	Rhodothermia	Balneolales	Balneolaceae	Balneola	Balneola sp006969905	Balneolaceae bacterium (algae metagenome)
GCA_006974145.1	Bacteria	Bacteroidota	Bacteroidia	Flavobacteriales	Flavobacteriaceae	Changchengzhania	Changchengzhania lutea	Changchengzhania lutea
GCA_007005625.1	Bacteria	Campylobacterota	Campylobacteria	Campylobacterales	Arcobacteraceae	Aliarcobacter	Aliarcobacter butzleri	Aliarcobacter butzleri (Arcobacter butzleri)
GCA_007163885.2	Bacteria	Proteobacteria	Gammaproteobacteria	Pseudomonadales	Halomonadaceae	Halomonas	Halomonas aquamarina	Halomonas axialensis
GCA_007182895.1	Bacteria	Proteobacteria	Gammaproteobacteria	Pseudomonadales	Moraxellaceae	Psychrobacter	Psychrobacter pacificensis	Psychrobacter sp. KH172YL61
GCA_007183175.1	Bacteria	Proteobacteria	Gammaproteobacteria	Pseudomonadales	Cellvibrionaceae	Microbulbifer	Microbulbifer sp007183175	Microbulbifer sp. GL-2
GCA_007197555.1	Bacteria	Proteobacteria	Gammaproteobacteria	Enterobacterales	Shewanellaceae	Shewanella	Shewanella sp007197555	Shewanella psychropiezotolerans
GCA_007197735.1	Bacteria	Bacteroidota	Bacteroidia	Flavobacteriales	Flavobacteriaceae	Formosa	Formosa sediminum	Formosa sediminum
GCA_007197775.1	Bacteria	Proteobacteria	Gammaproteobacteria	Enterobacterales	Alteromonadaceae	Thalassotalea_A	Thalassotalea_A sp007197775	Thalassotalea sp. PS06
GCA_007197795.1	Bacteria	Firmicutes	Bacilli	Bacillales	Anoxybacillaceae	Parageobacillus	Parageobacillus toebii	Geobacillus sp. E263
GCA_007289895.1	Bacteria	Proteobacteria	Gammaproteobacteria	Enterobacterales	Alteromonadaceae	Catenovulum	Catenovulum sediminis	Catenovulum sediminis
GCA_007362475.1	Bacteria	Bacteroidota	Bacteroidia	Flavobacteriales	Weeksellaceae	Kaistella	Kaistella sp007362475	Chryseobacterium sp. SNU WT5
GCA_007567505.1	Bacteria	Proteobacteria	Gammaproteobacteria	Enterobacterales	Shewanellaceae	Shewanella	Shewanella donghaensis	Shewanella donghaensis
GCA_007743815.1	Bacteria	Planctomycetota	Planctomycetia	Planctomycetales	Planctomycetaceae	Alienimonas	Alienimonas californiensis	Alienimonas californiensis
GCA_007744075.1	Bacteria	Planctomycetota	Planctomycetia	Planctomycetales	Planctomycetaceae	Gimesia	Gimesia benthica	Gimesia chilikensis
GCA_007744255.1	Bacteria	Planctomycetota	Planctomycetia	Planctomycetales	Planctomycetaceae	Thalassoglobus	Thalassoglobus polymorphus	Thalassoglobus polymorphus
GCA_007745635.1	Bacteria	Planctomycetota	Planctomycetia	Pirellulales	Pirellulaceae	Stieleria	Stieleria sp002167455	Planctomycetes bacterium SV_7m_r
GCA_007746295.1	Bacteria	Planctomycetota	Planctomycetia	Planctomycetales	Planctomycetaceae	Gimesia	Gimesia maris	Gimesia maris
GCA_007746795.1	Bacteria	Planctomycetota	Planctomycetia	Planctomycetales	Planctomycetaceae	Gimesia	Gimesia algae	Gimesia algae
GCA_007747015.1	Bacteria	Planctomycetota	Planctomycetia	Planctomycetales	Planctomycetaceae	Gimesia	Gimesia maris	Gimesia maris
GCA_007747445.1	Bacteria	Planctomycetota	Phycisphaerae	Phycisphaerales	Phycisphaeraceae	Poriferisphaera	Poriferisphaera corsica	Poriferisphaera corsica
GCA_007747795.1	Bacteria	Planctomycetota	Planctomycetia	Planctomycetales	Planctomycetaceae	Maioricimonas	Maioricimonas rarisocia	Maioricimonas rarisocia
GCA_007747995.1	Bacteria	Planctomycetota	Planctomycetia	Planctomycetales	Mal52	Symmachiella	Symmachiella dynata	Symmachiella dynata
GCA_007748015.1	Bacteria	Planctomycetota	Planctomycetia	Planctomycetales	Planctomycetaceae	Gimesia	Gimesia panareensis	Gimesia panareensis
GCA_007748055.1	Bacteria	Planctomycetota	Planctomycetia	Pan216	Pan216	Pan216	Pan216 sp007748055	Planctomycetes bacterium Pan216
GCA_007751715.1	Bacteria	Planctomycetota	Planctomycetia	Pirellulales	Pirellulaceae	Rosistilla	Rosistilla oblonga	Rosistilla oblonga
GCA_007751945.1	Bacteria	Planctomycetota	Planctomycetia	Planctomycetales	Planctomycetaceae	Gimesia	Gimesia panareensis	Gimesia panareensis
GCA_007752135.1	Bacteria	Planctomycetota	Planctomycetia	Pirellulales	Pirellulaceae	Aureliella	Aureliella helgolandensis	Aureliella helgolandensis
GCA_007752535.1	Bacteria	Planctomycetota	Planctomycetia	Isosphaerales	Isosphaeraceae	Tautonia	Tautonia plasticadhaerens	Tautonia plasticadhaerens
GCA_007752755.1	Bacteria	Planctomycetota	Planctomycetia	Pirellulales	Pirellulaceae	Rosistilla	Rosistilla oblonga	Rosistilla oblonga
GCA_007752935.1	Bacteria	Planctomycetota	Planctomycetia	Pirellulales	Pirellulaceae	Crateriforma	Crateriforma conspicua	Crateriforma conspicua
GCA_007753265.1	Bacteria	Planctomycetota	Planctomycetia	Pirellulales	Lacipirellulaceae	Botrimarina	Botrimarina mediterranea	Botrimarina mediterranea
GCA_007754425.1	Bacteria	Planctomycetota	Planctomycetia	Planctomycetales	Planctomycetaceae	Gimesia	Gimesia fumaroli	Gimesia fumaroli
GCA_007833275.1	Archaea	Halobacteriota	Halobacteria	Halobacteriales	Halobacteriaceae	Salarchaeum	Salarchaeum sp007833275	Salarchaeum sp. JOR-1
GCA_007833635.1	Bacteria	Proteobacteria	Alphaproteobacteria	Pelagibacterales	Pelagibacteraceae	Pelagibacter	Pelagibacter sp007833635	Candidatus Pelagibacter sp. FZCC0015
GCA_007922615.2	Bacteria	Proteobacteria	Alphaproteobacteria	Rhizobiales	Rhizobiaceae	Nitratireductor_D	Nitratireductor_D sp007922615	Nitratireductor sp. SY7
GCA_007993795.1	Bacteria	Bacteroidota	Bacteroidia	Flavobacteriales	Flavobacteriaceae	Gillisia	Gillisia arcticum	Antarcticibacterium arcticum
GCA_008000775.1	Archaea	Asgardarchaeota	Lokiarchaeia	CR-4	MK-D1	Prometheoarchaeum	Prometheoarchaeum syntrophicum	Candidatus Prometheoarchaeum syntrophicum
GCA_008000835.1	Bacteria	Campylobacterota	Campylobacteria	Campylobacterales	Arcobacteraceae	Malaciobacter	Malaciobacter marinus	Malaciobacter canalis (Arcobacter canalis)
GCA_008001015.1	Bacteria	Actinobacteriota	Actinomycetia	Actinomycetales	Dermatophilaceae	Serinicoccus	Serinicoccus profundi	Serinicoccus profundi
GCA_008001235.1	Bacteria	Desulfobacterota_I	Desulfovibrionia	Desulfovibrionales	Desulfovibrionaceae	Pseudodesulfovibrio	Pseudodesulfovibrio sp008001235	Desulfovibrio sp. IOR2
GCA_008035925.1	Bacteria	Planctomycetota	Planctomycetia	Pirellulales	Pirellulaceae	Stieleria	Stieleria maiorica	Stieleria maiorica
GCA_008041975.1	Bacteria	Firmicutes	Bacilli	Bacillales	Bacillaceae_G	Bacillus_A	Bacillus_A cereus	Bacillus cereus
GCA_008065135.1	Bacteria	Planctomycetota	Planctomycetia	Pirellulales	Pirellulaceae	Roseimaritima	Roseimaritima ulvae	Roseimaritima ulvae
GCA_008086325.1	Bacteria	Proteobacteria	Gammaproteobacteria	Pseudomonadales	Moraxellaceae	Acinetobacter	Acinetobacter nosocomialis	Acinetobacter nosocomialis
GCA_008087665.1	Bacteria	Planctomycetota	Planctomycetia	Pirellulales	Pirellulaceae	Mariniblastus	Mariniblastus fucicola	Mariniblastus fucicola
GCA_008121535.1	Bacteria	Cyanobacteria	Cyanobacteriia	Cyanobacteriales	Nostocaceae	Dolichospermum	Dolichospermum sp000312705	Dolichospermum sp. UHCC 0315A
GCA_008122265.1	Bacteria	Proteobacteria	Gammaproteobacteria	Pseudomonadales	Oleiphilaceae	Marinobacter_A	Marinobacter_A fonticola	Marinobacter fonticola
GCA_008152015.1	Archaea	Methanobacteriota_B	Thermococci	Thermococcales	Thermococcaceae	Thermococcus	Thermococcus celericrescens	Thermococcus aciditolerans
GCA_008152325.1	Bacteria	Firmicutes_A	Clostridia	Peptostreptococcales	Thermotaleaceae	SY095	SY095 sp008152325	Crassaminicella thermophila
GCA_008189285.1	Bacteria	Proteobacteria	Alphaproteobacteria	Rickettsiales	1604HC	Cytomitobacter	Cytomitobacter indipagum	Candidatus Cytomitobacter indipagum
GCA_008189405.1	Bacteria	Proteobacteria	Alphaproteobacteria	Rickettsiales	1604HC	Cytomitobacter	Cytomitobacter primus	Candidatus Cytomitobacter primus
GCA_008189525.1	Bacteria	Proteobacteria	Alphaproteobacteria	Rickettsiales	1604HC	Nesciobacter	Nesciobacter abundans	Candidatus Nesciobacter abundans
GCA_008189685.1	Bacteria	Proteobacteria	Alphaproteobacteria	Rickettsiales	Rickettsiaceae	Sneabacter	Sneabacter namystus	Candidatus Sneabacter namystus
GCA_008245085.1	Archaea	Methanobacteriota_B	Thermococci	Thermococcales	Thermococcaceae	Pyrococcus	Pyrococcus furiosus	Pyrococcus furiosus DSM 3638
GCA_008247605.1	Bacteria	Proteobacteria	Gammaproteobacteria	Pseudomonadales	Halomonadaceae	Kushneria	Kushneria phosphatilytica	Kushneria phosphatilytica
GCA_008329965.1	Bacteria	Spirochaetota	Spirochaetia	Spirochaetales_E	Spirochaetaceae_B	Oceanispirochaeta	Oceanispirochaeta crateris	Oceanispirochaeta crateris
GCA_008369765.1	Bacteria	Proteobacteria	Gammaproteobacteria	Francisellales	Francisellaceae	Francisella	Francisella salimarina	Francisella marina
GCA_008369785.1	Bacteria	Proteobacteria	Gammaproteobacteria	Francisellales	Francisellaceae	Francisella	Francisella salimarina	Francisella marina
GCA_008386315.1	Bacteria	Actinobacteriota	Actinomycetia	Actinomycetales	Dermatophilaceae	Serinicoccus	Serinicoccus marinus	Serinicoccus marinus DSM 15273
GCA_008432245.1	Bacteria	Firmicutes	Bacilli	Bacillales	Bacillaceae_G	Bacillus_A	Bacillus_A toyonensis	Bacillus sp. BS98
GCA_008630635.1	Bacteria	Proteobacteria	Gammaproteobacteria	Pseudomonadales	Nitrincolaceae	Neptunomonas	Neptunomonas concharum	Neptunomonas concharum
GCA_008642395.1	Bacteria	Proteobacteria	Gammaproteobacteria	Enterobacterales	Enterobacteriaceae	Escherichia	Escherichia coli	Escherichia coli
GCA_008642415.1	Bacteria	Proteobacteria	Gammaproteobacteria	Enterobacterales	Enterobacteriaceae	Escherichia	Escherichia coli	Escherichia coli
GCA_008727795.1	Bacteria	Proteobacteria	Gammaproteobacteria	Pseudomonadales	Nitrincolaceae	Nitrincola	Nitrincola sp008727795	Nitrincola iocasae
GCA_008728195.1	Bacteria	Proteobacteria	Alphaproteobacteria	Rhodobacterales	Rhodobacteraceae	Roseovarius	Roseovarius indicus	Roseovarius indicus
GCA_008807015.1	Bacteria	Proteobacteria	Gammaproteobacteria	Burkholderiales	Neisseriaceae	Neisseria	Neisseria zalophi	Neisseria zalophi
GCA_008807075.1	Bacteria	Cyanobacteria	Cyanobacteriia	PCC-6307	Cyanobiaceae	RSCCF101	RSCCF101 sp008807075	Synechococcus sp. RSCCF101
GCA_008807735.1	Bacteria	Firmicutes	Bacilli	Bacillales	Bacillaceae_G	Bacillus_A	Bacillus_A wiedmannii	Bacillus wiedmannii
GCA_008808095.1	Bacteria	Proteobacteria	Gammaproteobacteria	Enterobacterales	Alteromonadaceae	Pseudoalteromonas	Pseudoalteromonas ruthenica	Pseudoalteromonas ruthenica
GCA_008824145.1	Bacteria	Actinobacteriota	Actinomycetia	Streptosporangiales	Streptosporangiaceae	Spirillospora	Spirillospora sp008824145	Actinomadura sp. WMMB 499
GCA_008831545.1	Archaea	Halobacteriota	Halobacteria	Halobacteriales	Haladaptataceae	Halorussus	Halorussus sp008831545	Halorussus halophilus
GCA_008921745.1	Bacteria	Proteobacteria	Gammaproteobacteria	Enterobacterales	Vibrionaceae	Vibrio	Vibrio alginolyticus	Vibrio alginolyticus
GCA_008931805.1	Bacteria	Proteobacteria	Gammaproteobacteria	Enterobacterales	Moritellaceae	Moritella	Moritella marina	Moritella marina ATCC 15381
GCA_008932225.1	Bacteria	Proteobacteria	Alphaproteobacteria	Sphingomonadales	Sphingomonadaceae	Qipengyuania	Qipengyuania flava	Qipengyuania flava
GCA_008973485.1	Bacteria	Firmicutes	Bacilli	Bacillales_A	Planococcaceae	Psychrobacillus	Psychrobacillus glaciei	Psychrobacillus glaciei
GCA_009002475.1	Bacteria	Planctomycetota	J132	SRT547	SRT547	SRT547	SRT547 sp009002475	Candidatus Uabimicrobium amorphum
GCA_009017495.1	Bacteria	Deinococcota	Deinococci	Deinococcales	Deinococcaceae	Deinococcus	Deinococcus sp009017495	Deinococcus sp. AJ005
GCA_009068765.1	Bacteria	Campylobacterota	Campylobacteria	Campylobacterales	Sulfurimonadaceae	Sulfurimonas	Sulfurimonas sp009068765	Sulfurimonas hydrogeniphila
GCA_009176705.1	Bacteria	Proteobacteria	Gammaproteobacteria	Enterobacterales	Alteromonadaceae	Pseudoalteromonas	Pseudoalteromonas sp009176705	Pseudoalteromonas sp. A25
GCA_009184745.1	Bacteria	Proteobacteria	Gammaproteobacteria	Enterobacterales	Vibrionaceae	Vibrio	Vibrio harveyi	Vibrio harveyi
GCA_009258225.1	Bacteria	Campylobacterota	Campylobacteria	Campylobacterales	Sulfurimonadaceae	Sulfurimonas	Sulfurimonas sp009258225	Sulfurimonas lithotrophica
GCA_009362255.1	Bacteria	Bacteroidota	Bacteroidia	Flavobacteriales	Flavobacteriaceae	Tenacibaculum	Tenacibaculum mesophilum	Tenacibaculum mesophilum
GCA_009363255.1	Bacteria	Proteobacteria	Alphaproteobacteria	Rhodobacterales	Rhodobacteraceae	Roseivivax	Roseivivax sp009363255	Roseivivax sp. THAF197b
GCA_009363275.1	Bacteria	Proteobacteria	Gammaproteobacteria	Pseudomonadales	Oleiphilaceae	Marinobacter	Marinobacter shengliensis	Marinobacter sp. THAF197a
GCA_009363295.1	Bacteria	Actinobacteriota	Actinomycetia	Mycobacteriales	Mycobacteriaceae	Mycobacterium	Mycobacterium poriferae	Mycobacterium sp. THAF192
GCA_009363315.1	Bacteria	Proteobacteria	Alphaproteobacteria	Rhizobiales	Stappiaceae	Roseibium	Roseibium aggregatum_A	Labrenzia sp. THAF191b
GCA_009363335.1	Bacteria	Proteobacteria	Alphaproteobacteria	Rhizobiales	Stappiaceae	Roseibium	Roseibium aggregatum_A	Labrenzia sp. THAF191a
GCA_009363355.1	Bacteria	Proteobacteria	Gammaproteobacteria	Enterobacterales	Vibrionaceae	Vibrio	Vibrio fortis	Vibrio sp. THAF190c
GCA_009363375.1	Bacteria	Proteobacteria	Alphaproteobacteria	Rhizobiales	Stappiaceae	Roseibium	Roseibium aggregatum_A	Labrenzia sp. THAF187b
GCA_009363395.1	Bacteria	Proteobacteria	Gammaproteobacteria	Pseudomonadales	Pseudomonadaceae	Pseudomonas_E	Pseudomonas_E khazarica	Pseudomonas sp. THAF187a
GCA_009363415.1	Bacteria	Proteobacteria	Gammaproteobacteria	Enterobacterales	Vibrionaceae	Vibrio	Vibrio aquimaris	Vibrio aquimaris
GCA_009363435.1	Bacteria	Proteobacteria	Alphaproteobacteria	Rhizobiales	Stappiaceae	Roseibium	Roseibium sp009363435	Labrenzia sp. THAF82
GCA_009363455.1	Bacteria	Proteobacteria	Gammaproteobacteria	Enterobacterales	Vibrionaceae	Vibrio	Vibrio coralliilyticus	Vibrio sp. THAF64
GCA_009363475.1	Bacteria	Proteobacteria	Gammaproteobacteria	Pseudomonadales	Pseudomonadaceae	Pseudomonas_E	Pseudomonas_E khazarica	Pseudomonas sp. THAF42
GCA_009363495.1	Bacteria	Proteobacteria	Alphaproteobacteria	Rhodobacterales	Rhodobacteraceae	Roseivivax	Roseivivax sp009363255	Roseivivax sp. THAF40
GCA_009363515.1	Bacteria	Proteobacteria	Gammaproteobacteria	Pseudomonadales	Oleiphilaceae	Marinobacter	Marinobacter shengliensis	Marinobacter sp. THAF39
GCA_009363535.1	Bacteria	Proteobacteria	Gammaproteobacteria	Pseudomonadales	Cellvibrionaceae	Microbulbifer	Microbulbifer sp009363535	Microbulbifer sp. THAF38
GCA_009363555.1	Bacteria	Proteobacteria	Alphaproteobacteria	Rhodobacterales	Rhodobacteraceae	Sulfitobacter	Sulfitobacter sp009363555	Sulfitobacter sp. THAF37
GCA_009363575.1	Bacteria	Proteobacteria	Alphaproteobacteria	Rhodobacterales	Rhodobacteraceae	Roseivivax	Roseivivax halotolerans	Roseivivax sp. THAF30
GCA_009363595.1	Bacteria	Proteobacteria	Alphaproteobacteria	Rhizobiales	Stappiaceae	Roseibium	Roseibium aggregatum_A	Labrenzia sp. THAF35
GCA_009363615.1	Bacteria	Proteobacteria	Alphaproteobacteria	Rhodobacterales	Rhodobacteraceae	Ruegeria	Ruegeria sp009363615	Ruegeria sp. THAF33
GCA_009363635.1	Bacteria	Proteobacteria	Alphaproteobacteria	Sphingomonadales	Sphingomonadaceae	Erythrobacter	Erythrobacter sp009363635	Erythrobacter sp. THAF29
GCA_009363655.1	Bacteria	Proteobacteria	Alphaproteobacteria	Rhodobacterales	Rhodobacteraceae	Roseovarius	Roseovarius sp009363655	Roseovarius sp. THAF27
GCA_009363675.1	Bacteria	Proteobacteria	Gammaproteobacteria	Pseudomonadales	Halomonadaceae	Halomonas	Halomonas smyrnensis	Halomonas sp. THAF12
GCA_009363695.1	Bacteria	Firmicutes	Bacilli	Bacillales	Bacillaceae_I	Sutcliffiella_A	Sutcliffiella_A sp009363695	Bacillus sp. THAF10
GCA_009363715.1	Bacteria	Proteobacteria	Alphaproteobacteria	Rhodobacterales	Rhodobacteraceae	Roseovarius	Roseovarius sp009363715	Roseovarius sp. THAF9
GCA_009363735.1	Bacteria	Proteobacteria	Alphaproteobacteria	Rhodobacterales	Rhodobacteraceae	Roseovarius	Roseovarius sp009363655	Roseovarius sp. THAF8
GCA_009363755.1	Bacteria	Proteobacteria	Gammaproteobacteria	Pseudomonadales	Halomonadaceae	Halomonas	Halomonas sp009363755	Halomonas sp. THAF5a
GCA_009363775.1	Bacteria	Proteobacteria	Gammaproteobacteria	Enterobacterales	Alteromonadaceae	Pseudoalteromonas	Pseudoalteromonas ruthenica	Pseudoalteromonas sp. THAF3
GCA_009363795.1	Bacteria	Proteobacteria	Alphaproteobacteria	Rhodobacterales	Rhodobacteraceae	Palleronia	Palleronia sp900609015	Maribius sp. THAF1
GCA_009363815.1	Bacteria	Proteobacteria	Gammaproteobacteria	Pseudomonadales	Pseudomonadaceae	Pseudomonas_A	Pseudomonas_A sp003205815	Pseudomonas sp. THAF7b
GCA_009363835.1	Bacteria	Firmicutes	Bacilli	Bacillales	Bacillaceae	Bacillus	Bacillus subtilis	Bacillus subtilis
GCA_009388985.1	Bacteria	Proteobacteria	Gammaproteobacteria	Pseudomonadales	Halieaceae	Halioglobus	Halioglobus maricola	Halioglobus maricola
GCA_009429005.1	Bacteria	Firmicutes	Bacilli	Bacillales	Bacillaceae_G	Bacillus_A	Bacillus_A paranthracis	Bacillaceae bacterium C02
GCA_009429025.1	Bacteria	Firmicutes	Bacilli	Bacillales	Bacillaceae_G	Bacillus_A	Bacillus_A paranthracis	Bacillaceae bacterium C05
GCA_009498295.1	Bacteria	Bacteroidota	Bacteroidia	Flavobacteriales	Flavobacteriaceae	Wocania	Wocania sp009498295	Oceanihabitans sp. IOP_32
GCA_009617975.1	Archaea	Nanohaloarchaeota	Nanosalinia	Nanosalinales	Nanosalinaceae	Nanohalobium	Nanohalobium constans	Candidatus Nanohalobium constans
GCA_009617995.1	Archaea	Halobacteriota	Halobacteria	Halobacteriales	Haloarculaceae	Halomicrobium	Halomicrobium sp009617995	Halomicrobium sp. LC1Hm
GCA_009649995.1	Bacteria	Firmicutes	Bacilli	Paenibacillales	Paenibacillaceae	Paenibacillus_O	Paenibacillus_O pasadenensis	Paenibacillus sp. B01
GCA_009650215.1	Bacteria	Actinobacteriota	Acidimicrobiia	Acidimicrobiales	SKKL01	Actinomarinicola	Actinomarinicola tropica	Actinomarinicola tropica
GCA_009664245.1	Bacteria	Proteobacteria	Alphaproteobacteria	Rhizobiales	Rhizobiaceae	Sinorhizobium	Sinorhizobium meliloti	Sinorhizobium meliloti (Rhizobium meliloti)
GCA_009664835.1	Bacteria	Actinobacteriota	Actinomycetia	Mycobacteriales	Pseudonocardiaceae	Allosaccharopolyspora	Allosaccharopolyspora coralli	Allosaccharopolyspora coralli
GCA_009676865.1	Bacteria	Proteobacteria	Gammaproteobacteria	Enterobacterales	Vibrionaceae	Vibrio	Vibrio coralliilyticus	Vibrio sp. THAF191d
GCA_009688945.1	Bacteria	Desulfobacterota	Desulfobacteria	Desulfobacterales	Desulfosarcinaceae	Desulfosarcina	Desulfosarcina alkanivorans	Desulfosarcina alkanivorans
GCA_009688965.1	Bacteria	Desulfobacterota	Desulfobacteria	Desulfobacterales	Desulfosarcinaceae	Desulfosarcina	Desulfosarcina widdelii	Desulfosarcina widdelii
GCA_009689005.1	Bacteria	Desulfobacterota	Desulfobacteria	Desulfobacterales	Desulfosarcinaceae	Desulfosarcina	Desulfosarcina ovata	Desulfosarcina ovata subsp. ovata
GCA_009707325.1	Bacteria	Proteobacteria	Gammaproteobacteria	Pseudomonadales	Pseudomonadaceae	Pseudomonas_E	Pseudomonas_E sp002263605	Pseudomonas sp. IB20
GCA_009707425.1	Bacteria	Actinobacteriota	Actinomycetia	Mycobacteriales	Micromonosporaceae	Micromonospora	Micromonospora sp009707425	Micromonospora sp. WMMC415
GCA_009708195.1	Bacteria	Proteobacteria	Gammaproteobacteria	Enterobacterales	Vibrionaceae	Vibrio	Vibrio coralliilyticus	Vibrio sp. THAF191c
GCA_009708235.1	Bacteria	Proteobacteria	Gammaproteobacteria	Piscirickettsiales	Piscirickettsiaceae	Piscirickettsia	Piscirickettsia salmonis	Piscirickettsia salmonis
GCA_009708255.1	Bacteria	Proteobacteria	Gammaproteobacteria	Piscirickettsiales	Piscirickettsiaceae	Piscirickettsia	Piscirickettsia salmonis	Piscirickettsia salmonis
GCA_009708275.1	Bacteria	Proteobacteria	Gammaproteobacteria	Piscirickettsiales	Piscirickettsiaceae	Piscirickettsia	Piscirickettsia salmonis	Piscirickettsia salmonis
GCA_009708295.1	Bacteria	Proteobacteria	Gammaproteobacteria	Piscirickettsiales	Piscirickettsiaceae	Piscirickettsia	Piscirickettsia salmonis	Piscirickettsia salmonis
GCA_009708315.1	Bacteria	Proteobacteria	Gammaproteobacteria	Piscirickettsiales	Piscirickettsiaceae	Piscirickettsia	Piscirickettsia salmonis	Piscirickettsia salmonis
GCA_009708335.1	Bacteria	Proteobacteria	Gammaproteobacteria	Piscirickettsiales	Piscirickettsiaceae	Piscirickettsia	Piscirickettsia salmonis	Piscirickettsia salmonis
GCA_009708355.1	Bacteria	Proteobacteria	Gammaproteobacteria	Piscirickettsiales	Piscirickettsiaceae	Piscirickettsia	Piscirickettsia salmonis	Piscirickettsia salmonis
GCA_009708435.1	Bacteria	Proteobacteria	Gammaproteobacteria	Piscirickettsiales	Piscirickettsiaceae	Piscirickettsia	Piscirickettsia salmonis	Piscirickettsia salmonis
GCA_009708575.1	Bacteria	Proteobacteria	Gammaproteobacteria	Piscirickettsiales	Piscirickettsiaceae	Piscirickettsia	Piscirickettsia salmonis	Piscirickettsia salmonis
GCA_009708695.1	Bacteria	Proteobacteria	Gammaproteobacteria	Piscirickettsiales	Piscirickettsiaceae	Piscirickettsia	Piscirickettsia salmonis	Piscirickettsia salmonis
GCA_009708715.1	Bacteria	Proteobacteria	Gammaproteobacteria	Piscirickettsiales	Piscirickettsiaceae	Piscirickettsia	Piscirickettsia salmonis	Piscirickettsia salmonis
GCA_009708735.1	Bacteria	Proteobacteria	Gammaproteobacteria	Piscirickettsiales	Piscirickettsiaceae	Piscirickettsia	Piscirickettsia salmonis	Piscirickettsia salmonis
GCA_009708755.1	Bacteria	Proteobacteria	Gammaproteobacteria	Piscirickettsiales	Piscirickettsiaceae	Piscirickettsia	Piscirickettsia salmonis	Piscirickettsia salmonis
GCA_009708775.1	Bacteria	Proteobacteria	Gammaproteobacteria	Piscirickettsiales	Piscirickettsiaceae	Piscirickettsia	Piscirickettsia salmonis	Piscirickettsia salmonis
GCA_009708795.1	Bacteria	Proteobacteria	Gammaproteobacteria	Piscirickettsiales	Piscirickettsiaceae	Piscirickettsia	Piscirickettsia salmonis	Piscirickettsia salmonis
GCA_009708815.1	Bacteria	Proteobacteria	Gammaproteobacteria	Piscirickettsiales	Piscirickettsiaceae	Piscirickettsia	Piscirickettsia salmonis	Piscirickettsia salmonis
GCA_009708855.1	Bacteria	Proteobacteria	Gammaproteobacteria	Piscirickettsiales	Piscirickettsiaceae	Piscirickettsia	Piscirickettsia salmonis	Piscirickettsia salmonis
GCA_009708875.1	Bacteria	Proteobacteria	Gammaproteobacteria	Piscirickettsiales	Piscirickettsiaceae	Piscirickettsia	Piscirickettsia salmonis	Piscirickettsia salmonis
GCA_009708895.1	Bacteria	Proteobacteria	Gammaproteobacteria	Piscirickettsiales	Piscirickettsiaceae	Piscirickettsia	Piscirickettsia salmonis	Piscirickettsia salmonis
GCA_009708915.1	Bacteria	Proteobacteria	Gammaproteobacteria	Piscirickettsiales	Piscirickettsiaceae	Piscirickettsia	Piscirickettsia salmonis	Piscirickettsia salmonis
GCA_009708935.1	Bacteria	Proteobacteria	Gammaproteobacteria	Piscirickettsiales	Piscirickettsiaceae	Piscirickettsia	Piscirickettsia salmonis	Piscirickettsia salmonis
GCA_009708955.1	Bacteria	Proteobacteria	Gammaproteobacteria	Piscirickettsiales	Piscirickettsiaceae	Piscirickettsia	Piscirickettsia salmonis	Piscirickettsia salmonis
GCA_009708975.1	Bacteria	Proteobacteria	Gammaproteobacteria	Piscirickettsiales	Piscirickettsiaceae	Piscirickettsia	Piscirickettsia salmonis	Piscirickettsia salmonis
GCA_009708995.1	Bacteria	Proteobacteria	Gammaproteobacteria	Piscirickettsiales	Piscirickettsiaceae	Piscirickettsia	Piscirickettsia salmonis	Piscirickettsia salmonis
GCA_009709015.1	Bacteria	Proteobacteria	Gammaproteobacteria	Piscirickettsiales	Piscirickettsiaceae	Piscirickettsia	Piscirickettsia salmonis	Piscirickettsia salmonis
GCA_009709035.1	Bacteria	Proteobacteria	Gammaproteobacteria	Piscirickettsiales	Piscirickettsiaceae	Piscirickettsia	Piscirickettsia salmonis	Piscirickettsia salmonis
GCA_009709055.1	Bacteria	Proteobacteria	Gammaproteobacteria	Piscirickettsiales	Piscirickettsiaceae	Piscirickettsia	Piscirickettsia salmonis	Piscirickettsia salmonis
GCA_009709075.1	Bacteria	Proteobacteria	Gammaproteobacteria	Piscirickettsiales	Piscirickettsiaceae	Piscirickettsia	Piscirickettsia salmonis	Piscirickettsia salmonis
GCA_009709095.1	Bacteria	Proteobacteria	Gammaproteobacteria	Piscirickettsiales	Piscirickettsiaceae	Piscirickettsia	Piscirickettsia salmonis	Piscirickettsia salmonis
GCA_009709115.1	Bacteria	Proteobacteria	Gammaproteobacteria	Piscirickettsiales	Piscirickettsiaceae	Piscirickettsia	Piscirickettsia salmonis	Piscirickettsia salmonis
GCA_009709135.1	Bacteria	Proteobacteria	Gammaproteobacteria	Piscirickettsiales	Piscirickettsiaceae	Piscirickettsia	Piscirickettsia salmonis	Piscirickettsia salmonis
GCA_009709155.1	Bacteria	Proteobacteria	Gammaproteobacteria	Piscirickettsiales	Piscirickettsiaceae	Piscirickettsia	Piscirickettsia salmonis	Piscirickettsia salmonis
GCA_009709175.1	Bacteria	Proteobacteria	Gammaproteobacteria	Piscirickettsiales	Piscirickettsiaceae	Piscirickettsia	Piscirickettsia salmonis	Piscirickettsia salmonis
GCA_009709195.1	Bacteria	Proteobacteria	Gammaproteobacteria	Piscirickettsiales	Piscirickettsiaceae	Piscirickettsia	Piscirickettsia salmonis	Piscirickettsia salmonis
GCA_009709215.1	Bacteria	Proteobacteria	Gammaproteobacteria	Piscirickettsiales	Piscirickettsiaceae	Piscirickettsia	Piscirickettsia salmonis	Piscirickettsia salmonis
GCA_009709235.1	Bacteria	Proteobacteria	Gammaproteobacteria	Piscirickettsiales	Piscirickettsiaceae	Piscirickettsia	Piscirickettsia salmonis	Piscirickettsia salmonis
GCA_009709255.1	Bacteria	Proteobacteria	Gammaproteobacteria	Piscirickettsiales	Piscirickettsiaceae	Piscirickettsia	Piscirickettsia salmonis	Piscirickettsia salmonis
GCA_009709275.1	Bacteria	Proteobacteria	Gammaproteobacteria	Piscirickettsiales	Piscirickettsiaceae	Piscirickettsia	Piscirickettsia salmonis	Piscirickettsia salmonis
GCA_009709295.1	Bacteria	Proteobacteria	Gammaproteobacteria	Piscirickettsiales	Piscirickettsiaceae	Piscirickettsia	Piscirickettsia salmonis	Piscirickettsia salmonis
GCA_009709315.1	Bacteria	Proteobacteria	Gammaproteobacteria	Piscirickettsiales	Piscirickettsiaceae	Piscirickettsia	Piscirickettsia salmonis	Piscirickettsia salmonis
GCA_009709335.1	Bacteria	Proteobacteria	Gammaproteobacteria	Piscirickettsiales	Piscirickettsiaceae	Piscirickettsia	Piscirickettsia salmonis	Piscirickettsia salmonis
GCA_009709355.1	Bacteria	Proteobacteria	Gammaproteobacteria	Piscirickettsiales	Piscirickettsiaceae	Piscirickettsia	Piscirickettsia salmonis	Piscirickettsia salmonis
GCA_009709375.1	Bacteria	Proteobacteria	Gammaproteobacteria	Piscirickettsiales	Piscirickettsiaceae	Piscirickettsia	Piscirickettsia salmonis	Piscirickettsia salmonis
GCA_009709395.1	Bacteria	Proteobacteria	Gammaproteobacteria	Piscirickettsiales	Piscirickettsiaceae	Piscirickettsia	Piscirickettsia salmonis	Piscirickettsia salmonis
GCA_009709415.1	Bacteria	Proteobacteria	Gammaproteobacteria	Piscirickettsiales	Piscirickettsiaceae	Piscirickettsia	Piscirickettsia salmonis	Piscirickettsia salmonis
GCA_009709435.1	Bacteria	Proteobacteria	Gammaproteobacteria	Piscirickettsiales	Piscirickettsiaceae	Piscirickettsia	Piscirickettsia salmonis	Piscirickettsia salmonis
GCA_009709455.1	Bacteria	Proteobacteria	Gammaproteobacteria	Piscirickettsiales	Piscirickettsiaceae	Piscirickettsia	Piscirickettsia salmonis	Piscirickettsia salmonis
GCA_009709475.1	Bacteria	Proteobacteria	Gammaproteobacteria	Piscirickettsiales	Piscirickettsiaceae	Piscirickettsia	Piscirickettsia salmonis	Piscirickettsia salmonis
GCA_009709495.1	Bacteria	Proteobacteria	Gammaproteobacteria	Piscirickettsiales	Piscirickettsiaceae	Piscirickettsia	Piscirickettsia salmonis	Piscirickettsia salmonis
GCA_009709515.1	Bacteria	Proteobacteria	Gammaproteobacteria	Piscirickettsiales	Piscirickettsiaceae	Piscirickettsia	Piscirickettsia salmonis	Piscirickettsia salmonis
GCA_009709535.1	Bacteria	Proteobacteria	Gammaproteobacteria	Piscirickettsiales	Piscirickettsiaceae	Piscirickettsia	Piscirickettsia salmonis	Piscirickettsia salmonis
GCA_009720525.1	Bacteria	Planctomycetota	Planctomycetia	Planctomycetales	Planctomycetaceae	Gimesia	Gimesia benthica	Gimesia benthica
GCA_009720545.1	Bacteria	Planctomycetota	Planctomycetia	Planctomycetales	Planctomycetaceae	Gimesia	Gimesia maris	Gimesia maris
GCA_009720625.1	Bacteria	Firmicutes	Bacilli	Bacillales	Bacillaceae	Metabacillus	Metabacillus sp004801455	Metabacillus sediminilitoris
GCA_009724885.1	Bacteria	Proteobacteria	Gammaproteobacteria	Piscirickettsiales	Piscirickettsiaceae	Piscirickettsia	Piscirickettsia salmonis	Piscirickettsia salmonis
GCA_009724905.1	Bacteria	Proteobacteria	Gammaproteobacteria	Piscirickettsiales	Piscirickettsiaceae	Piscirickettsia	Piscirickettsia salmonis	Piscirickettsia salmonis
GCA_009728585.1	Bacteria	Proteobacteria	Gammaproteobacteria	Pseudomonadales	Halomonadaceae	Halomonas	Halomonas titanicae	Halomonas sp. PA16-9
GCA_009734265.1	Bacteria	Proteobacteria	Gammaproteobacteria	Halothiobacillales	Halothiobacillaceae	Guyparkeria	Guyparkeria halophila	Guyparkeria halophila
GCA_009734345.1	Bacteria	Proteobacteria	Gammaproteobacteria	Enterobacterales	Alteromonadaceae	Pseudidiomarina	Pseudidiomarina andamanensis	Idiomarina andamanensis
GCA_009738125.1	Bacteria	Firmicutes	Bacilli	Lactobacillales	Carnobacteriaceae	Carnobacterium	Carnobacterium maltaromaticum	Carnobacterium maltaromaticum
GCA_009739515.1	Bacteria	Proteobacteria	Alphaproteobacteria	Sphingomonadales	Sphingomonadaceae	Sphingomonas_G	Sphingomonas_G sp009739515	Sphingomonas profundi
GCA_009739925.1	Bacteria	Firmicutes	Bacilli	Bacillales	Bacillaceae_G	Bacillus_A	Bacillus_A thuringiensis	Bacillus cereus
GCA_009739945.1	Bacteria	Firmicutes	Bacilli	Bacillales	Bacillaceae_G	Bacillus_A	Bacillus_A luti	Bacillus luti
GCA_009739985.1	Bacteria	Firmicutes	Bacilli	Bacillales	Bacillaceae_G	Bacillus_A	Bacillus_A cereus	Bacillus cereus
GCA_009740005.1	Bacteria	Firmicutes	Bacilli	Bacillales	Bacillaceae_G	Bacillus_A	Bacillus_A albus	Bacillus albus
GCA_009759785.1	Bacteria	Proteobacteria	Gammaproteobacteria	Enterobacterales	Alteromonadaceae	Alteromonas	Alteromonas mediterranea	Alteromonas mediterranea
GCA_009791455.1	Bacteria	Proteobacteria	Gammaproteobacteria	Enterobacterales	Aeromonadaceae	Aeromonas	Aeromonas hydrophila	Aeromonas hydrophila
GCA_009796765.1	Bacteria	Proteobacteria	Gammaproteobacteria	Enterobacterales	Alteromonadaceae	Paraglaciecola	Paraglaciecola sp009796765	Paraglaciecola sp. L3A3
GCA_009796785.1	Bacteria	Bacteroidota	Bacteroidia	Flavobacteriales	Flavobacteriaceae	Polaribacter	Polaribacter sp009796785	Polaribacter sp. L3A8
GCA_009796805.1	Bacteria	Bacteroidota	Bacteroidia	Flavobacteriales	Flavobacteriaceae	Algibacter	Algibacter sp009796805	Algibacter sp. L1A34
GCA_009796825.1	Bacteria	Bacteroidota	Bacteroidia	Flavobacteriales	Flavobacteriaceae	Algibacter	Algibacter sp009796825	Algibacter sp. L3A6
GCA_009796845.1	Bacteria	Proteobacteria	Gammaproteobacteria	Pseudomonadales	Halomonadaceae	Cobetia	Cobetia sp009796845	Cobetia sp. L2A1
GCA_009796865.1	Bacteria	Bacteroidota	Bacteroidia	Flavobacteriales	Flavobacteriaceae	Formosa	Formosa sp009796865	Formosa sp. L2A11
GCA_009797025.1	Bacteria	Bacteroidota	Bacteroidia	Flavobacteriales	Flavobacteriaceae	Cellulophaga	Cellulophaga sp009797025	Cellulophaga sp. L1A9
GCA_009828855.1	Bacteria	Proteobacteria	Gammaproteobacteria	Enterobacterales	Psychromonadaceae	Psychromonas	Psychromonas sp009828855	Psychromonas sp. L1A2
GCA_009832865.1	Bacteria	Proteobacteria	Gammaproteobacteria	Enterobacterales	Alteromonadaceae	Colwellia	Colwellia sp009832865	Colwellia sp. 20A7
GCA_009846525.1	Bacteria	Proteobacteria	Gammaproteobacteria	Pseudomonadales	Halomonadaceae	Halomonas	Halomonas sp002696125	Halomonas meridiana
GCA_009857135.1	Bacteria	Actinobacteriota	Actinomycetia	Streptomycetales	Streptomycetaceae	Streptomyces	Streptomyces sp009857135	Streptomyces sp. HM190
GCA_009867075.1	Bacteria	Actinobacteriota	Actinomycetia	Streptomycetales	Streptomycetaceae	Streptomyces	Streptomyces cacaoi	Streptomyces sp. NHF165
GCA_009903625.1	Bacteria	Proteobacteria	Gammaproteobacteria	Pseudomonadales	Cellvibrionaceae	Microbulbifer	Microbulbifer sp009903625	Microbulbifer sp. ALW1
GCA_009910365.1	Bacteria	Proteobacteria	Gammaproteobacteria	Pseudomonadales	Halieaceae	Aequoribacter	Aequoribacter fuscus	Aequoribacter fuscus
GCA_010092445.1	Bacteria	Proteobacteria	Gammaproteobacteria	Enterobacterales	Shewanellaceae	Shewanella	Shewanella sp002836315	Shewanella sp. Arc9-LZ
GCA_010669185.1	Bacteria	Proteobacteria	Gammaproteobacteria	Pseudomonadales	Pseudomonadaceae	Pseudomonas_D	Pseudomonas_D profundi	Pseudomonas sp. OIL-1
GCA_010977575.1	Bacteria	Proteobacteria	Gammaproteobacteria	Pseudomonadales	Halomonadaceae	Halomonas_B	Halomonas_B socia	Halomonas socia
GCA_011045415.1	Bacteria	Campylobacterota	Campylobacteria	Campylobacterales	Arcobacteraceae	Aliarcobacter	Aliarcobacter cryaerophilus_A	Aliarcobacter cryaerophilus (Arcobacter cryaerophilus)
GCA_011057975.1	Bacteria	Proteobacteria	Alphaproteobacteria	Sphingomonadales	Sphingomonadaceae	Sphingomonas	Sphingomonas sp011057975	Sphingosinithalassobacter tenebrarum
GCA_011068285.1	Bacteria	Bacteroidota	Bacteroidia	Flavobacteriales	Flavobacteriaceae	Muricauda	Muricauda sp011068285	Muricauda oceani
GCA_011082085.1	Bacteria	Firmicutes	Bacilli	Bacillales_G	HB172195	Anaerobacillus_A	Anaerobacillus_A sp002563635	Bacillus sp. Cs-700
GCA_011492945.1	Bacteria	Actinobacteriota	Rubrobacteria	Rubrobacterales	Rubrobacteraceae	SCSIO-52909	SCSIO-52909 sp011492945	Rubrobacter tropicus
GCA_011492965.1	Bacteria	Actinobacteriota	Rubrobacteria	Rubrobacterales	Rubrobacteraceae	SCSIO-52915	SCSIO-52915 sp011492965	Rubrobacter marinus
GCA_011617465.1	Bacteria	Actinobacteriota	Actinomycetia	Actinomycetales	Brevibacteriaceae	Brevibacterium	Brevibacterium sp011617465	Brevibacterium pigmentatum
GCA_011617705.1	Bacteria	Actinobacteriota	Actinomycetia	Actinomycetales	Brevibacteriaceae	Brevibacterium	Brevibacterium sp011617705	Brevibacterium limosum
GCA_011650445.1	Bacteria	Actinobacteriota	Actinomycetia	Streptomycetales	Streptomycetaceae	Streptomyces	Streptomyces olivaceus	Streptomyces sp. VN1
GCA_012516435.1	Bacteria	Desulfobacterota_I	Desulfovibrionia	Desulfovibrionales	Desulfovibrionaceae	Pseudodesulfovibrio	Pseudodesulfovibrio sp012516435	Pseudodesulfovibrio sp. zrk46
GCA_012530535.1	Bacteria	Actinobacteriota	Actinomycetia	Actinomycetales	Microbacteriaceae	Yonghaparkia	Yonghaparkia sp012530535	Microcella flavibacter
GCA_012584515.1	Bacteria	Proteobacteria	Gammaproteobacteria	Burkholderiales	Burkholderiaceae	Polaromonas	Polaromonas vacuolata	Polaromonas vacuolata
GCA_012844345.1	Bacteria	Proteobacteria	Gammaproteobacteria	Pseudomonadales	Pseudomonadaceae	Pseudomonas_D	Pseudomonas_D sp012844345	Pseudomonas sp. gcc21
GCA_012955605.1	Bacteria	Firmicutes	Bacilli	JC228	JC228	L13	L13 sp012955605	Bacillus fonticola
GCA_013112375.1	Bacteria	Firmicutes	Bacilli	Bacillales	Bacillaceae_G	Bacillus_A	Bacillus_A cereus	Bacillus cereus
GCA_013128495.1	Bacteria	Proteobacteria	Gammaproteobacteria	Pseudomonadales	Alcanivoracaceae	Alcanivorax	Alcanivorax profundimaris	Alcanivorax sp. IO_7
GCA_013343275.1	Archaea	Nanohaloarchaeota	Nanosalinia	Nanosalinales	Nanosalinaceae	M3-22	M3-22 sp013343275	Nanohaloarchaea archaeon
GCA_013347125.1	Bacteria	Proteobacteria	Alphaproteobacteria	Rhodobacterales	Rhodobacteraceae	Ascidiaceihabitans	Ascidiaceihabitans pseudonitzschiae	Sulfitobacter pseudonitzschiae
GCA_013364095.1	Bacteria	Actinobacteriota	Actinomycetia	Streptomycetales	Streptomycetaceae	Streptomyces	Streptomyces harbinensis	Streptomyces harbinensis
GCA_013364155.1	Bacteria	Actinobacteriota	Actinomycetia	Streptomycetales	Streptomycetaceae	Streptomyces	Streptomyces sp013364155	Streptomyces sp. NA02950
GCA_013364175.1	Bacteria	Actinobacteriota	Actinomycetia	Streptomycetales	Streptomycetaceae	Streptomyces	Streptomyces fungicidicus_A	Streptomyces sp. NA02536
GCA_013364215.1	Bacteria	Actinobacteriota	Actinomycetia	Mycobacteriales	Micromonosporaceae	Micromonospora	Micromonospora sp004307965	Verrucosispora sp. NA02020
GCA_013364275.1	Bacteria	Actinobacteriota	Actinomycetia	Streptosporangiales	Streptosporangiaceae	Spirillospora	Spirillospora sp013364275	Actinomadura sp. NAK00032
GCA_013364295.1	Bacteria	Actinobacteria	Actinomycetia	Streptosporangiales	Nocardiopsaceae	Nocardiopsis	Nocardiopsis flavescens	Nocardiopsis flavescens
GCA_013364335.1	Bacteria	Actinobacteriota	Actinomycetia	Streptomycetales	Streptomycetaceae	Streptomyces	Streptomyces buecherae	Streptomyces buecherae
GCA_013364375.1	Bacteria	Actinobacteriota	Actinomycetia	Streptomycetales	Streptomycetaceae	Streptomyces	Streptomyces sp000772045	Streptomyces sp. NA03103
GCA_013375055.1	Bacteria	Actinobacteriota	Actinomycetia	Streptomycetales	Streptomycetaceae	Streptomyces	Streptomyces chartreusis	Streptomyces chartreusis
GCA_013391845.1	Bacteria	Proteobacteria	Gammaproteobacteria	Enterobacterales	Alteromonadaceae	Pseudoalteromonas	Pseudoalteromonas sp002685175	Pseudoalteromonas shioyasakiensis
GCA_013394105.1	Bacteria	Proteobacteria	Gammaproteobacteria	Francisellales	Francisellaceae	Francisella_A	Francisella_A adeliensis	Francisella sp. Scap27
GCA_013394145.1	Bacteria	Proteobacteria	Gammaproteobacteria	Enterobacterales	Shewanellaceae	Shewanella	Shewanella waksmanii	Shewanella sp. Scap07
GCA_013394165.1	Bacteria	Proteobacteria	Gammaproteobacteria	Enterobacterales	Alteromonadaceae	Pseudoalteromonas	Pseudoalteromonas undina	Pseudoalteromonas sp. Scap06
GCA_013394185.1	Bacteria	Proteobacteria	Gammaproteobacteria	Enterobacterales	Vibrionaceae	Vibrio	Vibrio sp013394185	Vibrio sp. Scap24
GCA_013394205.1	Bacteria	Proteobacteria	Gammaproteobacteria	Pseudomonadales	Nitrincolaceae	Neptunomonas	Neptunomonas phycophila	Neptunomonas phycophila
GCA_013414345.1	Bacteria	Actinobacteriota	Actinomycetia	Actinomycetales	Microbacteriaceae	Marinisubtilis	Marinisubtilis indicus	Chryseoglobus indicus
GCA_013423925.1	Bacteria	Proteobacteria	Gammaproteobacteria	Enterobacterales	Alteromonadaceae	Pseudoalteromonas	Pseudoalteromonas lipolytica	Pseudoalteromonas sp. JSTW
GCA_013466785.1	Bacteria	Actinobacteriota	Actinomycetia	Propionibacteriales	Nocardioidaceae	Nocardioides	Nocardioides marinisabuli	Nocardioides marinisabuli
GCA_013487745.1	Bacteria	Proteobacteria	Alphaproteobacteria	Rhodobacterales	Rhodobacteraceae	Sulfitobacter	Sulfitobacter pontiacus	Sulfitobacter pontiacus
GCA_013745115.1	Bacteria	Firmicutes	Bacilli	Izemoplasmatales	UBA5603	Zrk29	Zrk29 sp013745115	Tenericutes bacterium zrk29
GCA_014023125.1	Bacteria	Firmicutes	Bacilli	Izemoplasmatales	Izemoplasmataceae	Izemoplasma_B	Izemoplasma_B sp014023125	Firmicutes bacterium zrk13
GCA_014075215.1	Bacteria	Bacteroidota	Bacteroidia	Flavobacteriales	Flavobacteriaceae	SCGC-AAA160-P02	SCGC-AAA160-P02 sp014075215	Flavobacteriaceae bacterium (sponge metagenome)
GCA_014075255.1	Bacteria	Proteobacteria	Gammaproteobacteria	UBA4575	UBA4575	JABDMD01	JABDMD01 sp014075255	Gammaproteobacteria bacterium (sponge metagenome)
GCA_014075275.1	Bacteria	Proteobacteria	Alphaproteobacteria	Rhodobacterales	Rhodobacteraceae	Boseongicola	Boseongicola sp014075275	Boseongicola sp. (sponge metagenome)
GCA_014075295.1	Bacteria	Desulfobacterota_D	UBA1144	RKRQ01	GCA-014075295	GCA-014075295	GCA-014075295 sp014075295	Candidatus Dadabacteria bacterium (sponge metagenome)
GCA_014075315.1	Archaea	Thermoproteota	Nitrososphaeria	Nitrososphaerales	Nitrosopumilaceae	Nitrosopumilus	Nitrosopumilus sp014075315	Nitrosopumilus sp. (sponge metagenome)
GCA_014117385.1	Bacteria	Proteobacteria	Gammaproteobacteria	Enterobacterales	Alteromonadaceae	Pseudoalteromonas	Pseudoalteromonas lipolytica	Pseudoalteromonas sp. MT33b
GCA_014171575.1	Bacteria	Actinobacteriota	Actinomycetia	Actinomycetales	Microbacteriaceae	Microbacterium	Microbacterium sp014171575	Microbacterium sp. Se63.02b
GCA_014171595.1	Bacteria	Proteobacteria	Gammaproteobacteria	Burkholderiales	Burkholderiaceae	Massilia	Massilia sp014171595	Massilia sp. Se16.2.3
GCA_014171775.1	Bacteria	Proteobacteria	Gammaproteobacteria	Burkholderiales	Burkholderiaceae	Massilia	Massilia sp014171595	Massilia sp. Dwa41.01b
GCA_014211955.1	Bacteria	Proteobacteria	Alphaproteobacteria	Sphingomonadales	Sphingomonadaceae	Croceicoccus	Croceicoccus marinus	Croceicoccus marinus
GCA_014217915.1	Bacteria	Actinobacteriota	Actinomycetia	Actinomycetales	Dermatophilaceae	Janibacter	Janibacter indicus	Janibacter sp. YB324
GCA_014280015.1	Bacteria	Cyanobacteria	Cyanobacteriia	PCC-6307	Cyanobiaceae	Synechococcus_E	Synechococcus_E sp000195975	Synechococcus sp. A18-46.1
GCA_014280035.1	Bacteria	Cyanobacteria	Cyanobacteriia	PCC-6307	Cyanobiaceae	Synechococcus_C	Synechococcus_C sp002693285	Synechococcus sp. A18-25c
GCA_014280055.1	Bacteria	Cyanobacteria	Cyanobacteriia	PCC-6307	Cyanobiaceae	Synechococcus_E	Synechococcus_E sp000195975	Synechococcus sp. A18-40
GCA_014298115.1	Bacteria	Firmicutes	Bacilli	Bacillales	Bacillaceae	Bacillus	Bacillus subtilis	Bacillus subtilis subsp. subtilis
GCA_014334095.1	Bacteria	Proteobacteria	Alphaproteobacteria	Sphingomonadales	Sphingomonadaceae	Novosphingopyxis	Novosphingopyxis sp002683755	Novosphingopyxis iocasae
GCA_014334115.1	Bacteria	Proteobacteria	Alphaproteobacteria	Sphingomonadales	Sphingomonadaceae	Sphingomonas	Sphingomonas sp014334115	Sphingosinithalassobacter sp. CS137
GCA_014524565.1	Bacteria	Bacteroidota	Bacteroidia	Flavobacteriales	Schleiferiaceae	Croceimicrobium	Croceimicrobium hydrocarbonivorans	Croceimicrobium hydrocarbonivorans
GCA_014764305.1	Bacteria	Bacteroidota	Bacteroidia	Flavobacteriales	Flavobacteriaceae	Mesoflavibacter	Mesoflavibacter profundi	Mesoflavibacter profundi
GCA_014764405.1	Bacteria	Actinobacteriota	Actinomycetia	Mycobacteriales	Micromonosporaceae	Micromonospora	Micromonospora craniellae	Micromonospora craniellae
GCA_014825945.1	Bacteria	Proteobacteria	Gammaproteobacteria	Enterobacterales	Alteromonadaceae	Alteromonas	Alteromonas macleodii	Alteromonas macleodii
GCA_014838715.1	Bacteria	Bacteroidota	Bacteroidia	Cytophagales	Cyclobacteriaceae	Algoriphagus	Algoriphagus sp014838715	Algoriphagus sp. Y33
GCA_014840935.1	Bacteria	Proteobacteria	Gammaproteobacteria	Pseudomonadales	Halomonadaceae	Halomonas_E	Halomonas_E sp014840935	Halomonas sp. YLGW01
GCA_014840975.1	Bacteria	Proteobacteria	Gammaproteobacteria	Enterobacterales	Shewanellaceae	Shewanella	Shewanella japonica	Shewanella sp. WPAGA9
GCA_014905135.1	Bacteria	Campylobacterota	Campylobacteria	Campylobacterales	Sulfurimonadaceae	Sulfurimonas	Sulfurimonas paralvinellae	Sulfurimonas paralvinellae
GCA_014931605.1	Bacteria	Proteobacteria	Gammaproteobacteria	Pseudomonadales	Halomonadaceae	Halomonas	Halomonas sp014931605	Halomonas sp. MCCC 1A13316
GCA_014931715.1	Bacteria	Campylobacterota	Campylobacteria	Campylobacterales	Sulfurovaceae	Sulfurovum	Sulfurovum indicum	Sulfurovum indicum
GCA_015101885.1	Bacteria	Proteobacteria	Gammaproteobacteria	Burkholderiales	Burkholderiaceae	Massilia	Massilia sp015101885	Massilia sp. LPB0304
GCA_015243575.1	Bacteria	Firmicutes_A	Clostridia	Peptostreptococcales	Anaerovoracaceae	MT110	MT110 sp015243575	Clostridiales bacterium
GCA_015244315.1	Bacteria	Actinobacteriota	Actinomycetia	Streptomycetales	Streptomycetaceae	Streptomyces	Streptomyces olivaceus	Streptomyces olivaceus
GCA_015500095.1	Bacteria	Chloroflexota	Anaerolineae	Aggregatilineales	A4b	GCA-2699585	GCA-2699585 sp015500095	Phototrophicus methaneseepsis
GCA_015533855.1	Bacteria	Bacteroidota	Bacteroidia	Cytophagales	Cyclobacteriaceae	Echinicola	Echinicola sp015533855	Echinicola sp. 20G
GCA_015565955.1	Bacteria	Actinobacteriota	Actinomycetia	Actinomycetales	Microbacteriaceae	Microbacterium	Microbacterium schleiferi	Microbacterium schleiferi
GCA_015601545.1	Bacteria	Actinobacteriota	Actinomycetia	Streptomycetales	Streptomycetaceae	Streptomyces	Streptomyces albidoflavus	Streptomyces albidoflavus
GCA_015679265.1	Bacteria	Proteobacteria	Alphaproteobacteria	Rhodobacterales	Rhodobacteraceae	MT2928	MT2928 sp015679265	Pontivivens ytuae
GCA_015693905.1	Bacteria	Proteobacteria	Alphaproteobacteria	Rhodobacterales	Rhodobacteraceae	M30B80	M30B80 sp015693905	Rhodobacterales bacterium HKCCA1288
GCA_015698285.1	Bacteria	Nitrospinota	Nitrospinia	Nitrospinales	Nitrospinaceae	Nitronauta	Nitronauta litoralis	Candidatus Nitronauta litoralis (marine sediment metagenome)
GCA_015698305.1	Bacteria	Nitrospinota	Nitrospinia	Nitrospinales	Nitrospinaceae	Nitrohelix	Nitrohelix vancouverensis	Candidatus Nitrohelix vancouverensis (marine sediment metagenome)
GCA_015732475.1	Bacteria	Firmicutes	Bacilli	Bacillales	Bacillaceae	Bacillus	Bacillus velezensis	Bacillus velezensis
GCA_015767575.1	Bacteria	Proteobacteria	Alphaproteobacteria	Rhodospirillales	Thalassospiraceae	Thalassospira	Thalassospira xiamenensis	Thalassospira sp. B30-1
GCA_015767595.1	Bacteria	Proteobacteria	Alphaproteobacteria	Sphingomonadales	Sphingomonadaceae	Qipengyuania	Qipengyuania sp002895025	Erythrobacter sp. A30-3
GCA_015767615.1	Bacteria	Proteobacteria	Gammaproteobacteria	Enterobacterales	Alteromonadaceae	Pseudoalteromonas	Pseudoalteromonas lipolytica	Pseudoalteromonas sp. A41-2
GCA_015767635.1	Bacteria	Proteobacteria	Gammaproteobacteria	Pseudomonadales	Halomonadaceae	Halomonas	Halomonas sp002119345	Halomonas sp. A40-4
GCA_015767655.1	Bacteria	Proteobacteria	Gammaproteobacteria	Enterobacterales	Alteromonadaceae	Alteromonas	Alteromonas australica	Alteromonas sp. B31-7
GCA_015779285.1	Bacteria	Proteobacteria	Gammaproteobacteria	Enterobacterales	Vibrionaceae	Vibrio	Vibrio parahaemolyticus	Vibrio parahaemolyticus
GCA_015840335.1	Bacteria	Cyanobacteria	Cyanobacteriia	PCC-6307	Cyanobiaceae	Cyanobium_A	Cyanobium_A sp015840335	Synechococcus sp. CBW1108
GCA_015840525.1	Bacteria	Cyanobacteria	Cyanobacteriia	PCC-6307	Cyanobiaceae	CBW1002	CBW1002 sp015840915	Synechococcus sp. CBW1006
GCA_015840715.1	Bacteria	Cyanobacteria	Cyanobacteriia	PCC-6307	Cyanobiaceae	Cyanobium	Cyanobium sp015840715	Synechococcus sp. CBW1004
GCA_015840915.1	Bacteria	Cyanobacteria	Cyanobacteriia	PCC-6307	Cyanobiaceae	CBW1002	CBW1002 sp015840915	Synechococcus sp. CBW1002
GCA_015841355.1	Bacteria	Cyanobacteria	Cyanobacteriia	PCC-6307	Cyanobiaceae	WH-5701	WH-5701 sp015841355	Synechococcus sp. CBW1107
GCA_015871245.1	Bacteria	Proteobacteria	Alphaproteobacteria	Rhodobacterales	Rhodobacteraceae	Sulfitobacter	Sulfitobacter pontiacus	Sulfitobacter sp. B30-2
GCA_015871485.1	Bacteria	Proteobacteria	Alphaproteobacteria	Rhodospirillales	Thalassospiraceae	Thalassospira	Thalassospira tepidiphila	Thalassospira sp. A40-3
GCA_015910445.1	Bacteria	Actinobacteriota	Actinomycetia	Streptomycetales	Streptomycetaceae	Streptomyces	Streptomyces bathyalis	Streptomyces bathyalis
GCA_015992245.1	Bacteria	Proteobacteria	Gammaproteobacteria	Pseudomonadales	Halomonadaceae	Halomonas	Halomonas sp015992245	Halomonas sp. SS10-MC5
GCA_016134045.1	Bacteria	Proteobacteria	Alphaproteobacteria	Rhodobacterales	Rhodobacteraceae	Oceanicola	Oceanicola pacificus_A	Pelagovum pacificum
GCA_016406125.1	Bacteria	Firmicutes	Bacilli	Alicyclobacillales	Alicyclobacillaceae	SO9	SO9 sp016406125	Alicyclobacillus sp. SO9
GCA_016446305.1	Bacteria	Proteobacteria	Gammaproteobacteria	Burkholderiales	Burkholderiaceae	Alcaligenes	Alcaligenes faecalis	Alcaligenes faecalis
GCA_016592435.1	Bacteria	Proteobacteria	Gammaproteobacteria	Pseudomonadales	Nitrincolaceae	Amphritea	Amphritea japonica	Amphritea japonica ATCC BAA-1530
GCA_016592555.1	Bacteria	Proteobacteria	Gammaproteobacteria	Pseudomonadales	Nitrincolaceae	Neptunomonas	Neptunomonas japonica_A	Neptunomonas japonica JAMM 1380
GCA_016592575.1	Bacteria	Acidobacteriota	Holophagae	Thermotomaculales	Thermotomaculaceae	Thermotomaculum	Thermotomaculum hydrothermale	Thermotomaculum hydrothermale
GCA_016592615.1	Bacteria	Proteobacteria	Gammaproteobacteria	PS1	Thioglobaceae	Ruthia	Ruthia sp016592615	Isorropodon fossajaponicum endosymbiont JTNG4
GCA_016592635.1	Bacteria	Proteobacteria	Gammaproteobacteria	Methylococcales	Methylomonadaceae	Methyloprofundus	Methyloprofundus sp016592635	Methyloprofundus sp
GCA_016593175.1	Bacteria	Campylobacterota	Campylobacteria	Campylobacterales	Nitratiruptoraceae	Nitratiruptor	Nitratiruptor tergarcus	Nitratiruptor sp. YY08-13
GCA_016593195.1	Bacteria	Campylobacterota	Campylobacteria	Campylobacterales	Nitratiruptoraceae	YY08-10	YY08-10 sp016629565	Nitratiruptor sp. YY08-14
GCA_016593215.1	Bacteria	Campylobacterota	Campylobacteria	Campylobacterales	Nitratiruptoraceae	Nitratiruptor	Nitratiruptor tergarcus	Nitratiruptor sp. YY08-26
GCA_016593235.1	Bacteria	Campylobacterota	Campylobacteria	Campylobacterales	Nitratiruptoraceae	Nitratiruptor	Nitratiruptor sp016593235	Nitratiruptor sp. YY09-18
GCA_016593255.1	Bacteria	Campylobacterota	Campylobacteria	Campylobacterales	Hydrogenimonadaceae	Hydrogenimonas	Hydrogenimonas urashimensis	Hydrogenimonas urashimensis
GCA_016629565.1	Bacteria	Campylobacterota	Campylobacteria	Campylobacterales	Nitratiruptoraceae	YY08-10	YY08-10 sp016629565	Nitratiruptor sp. YY08-10
GCA_016756315.1	Bacteria	Proteobacteria	Gammaproteobacteria	Enterobacterales	Alteromonadaceae	Alteromonas	Alteromonas sp009811495	Alteromonas sp. KC3
GCA_016756335.1	Bacteria	Proteobacteria	Gammaproteobacteria	Enterobacterales	Alteromonadaceae	Alteromonas	Alteromonas sp009811495	Alteromonas sp. KC14
GCA_016757735.1	Bacteria	Bacteroidota	Bacteroidia	Flavobacteriales	Flavobacteriaceae	Aequorivita	Aequorivita sp016757735	Aequorivita iocasae
GCA_016757755.1	Bacteria	Proteobacteria	Gammaproteobacteria	Enterobacterales	Shewanellaceae	Shewanella	Shewanella sp016757755	Shewanella sp. KX20019
GCA_017498505.1	Bacteria	Firmicutes	Bacilli	Bacillales_A	Planococcaceae	Sporosarcina	Sporosarcina sp017498505	Sporosarcina sp. Te-1
GCA_017948265.1	Bacteria	Proteobacteria	Gammaproteobacteria	Burkholderiales	Burkholderiaceae	Rhodoferax	Rhodoferax sp017948265	Rhodoferax sp. PAMC 29310
GCA_018141405.1	Bacteria	Firmicutes_A	Clostridia	Peptostreptococcales	Natronincolaceae	Serpentinicella	Serpentinicella alkaliphila	Serpentinicella alkaliphila
GCA_018141425.1	Bacteria	Firmicutes_A	Clostridia	Lachnospirales	Vallitaleaceae	Vallitalea	Vallitalea guaymasensis	Vallitalea guaymasensis
GCA_018141445.1	Bacteria	Firmicutes_A	Clostridia	Lachnospirales	Vallitaleaceae	Vallitalea	Vallitalea pronyensis	Vallitalea pronyensis
GCA_018502385.1	Bacteria	Cyanobacteria	Cyanobacteriia	PCC-6307	Cyanobiaceae	Vulcanococcus	Vulcanococcus sp018502385	Synechococcus sp. LA31
GCA_900091425.1	Bacteria	Actinobacteriota	Actinomycetia	Mycobacteriales	Micromonosporaceae	Micromonospora	Micromonospora krabiensis	Micromonospora krabiensis
GCA_900095155.1	Bacteria	Proteobacteria	Alphaproteobacteria	Rhizobiales_A	Rhizobiaceae_A	Brucella	Brucella melitensis	Brucella inopinata
GCA_900099705.1	Bacteria	Actinobacteriota	Actinomycetia	Actinomycetales	Microbacteriaceae	Agrococcus	Agrococcus jejuensis	Agrococcus jejuensis
GCA_900101765.1	Bacteria	Bacteroidota	Bacteroidia	Flavobacteriales	Flavobacteriaceae	Nonlabens	Nonlabens sp900101765	Nonlabens sp. Hel1_33_55
GCA_900102005.1	Bacteria	Actinobacteriota	Actinomycetia	Actinomycetales	Microbacteriaceae	Microbacterium	Microbacterium sp900102005	Microbacterium sp. LKL04
GCA_900104375.1	Bacteria	Bacteroidota	Bacteroidia	Flavobacteriales	Flavobacteriaceae	MAR-2010-188	MAR-2010-188 sp900104375	Flavobacteriaceae bacterium MAR_2010_188
GCA_900104765.1	Bacteria	Bacteroidota	Bacteroidia	Flavobacteriales	Flavobacteriaceae	Gillisia	Gillisia sp900104765	Gillisia sp. Hel1_33_143
GCA_900105005.1	Bacteria	Proteobacteria	Gammaproteobacteria	Pseudomonadales	Pseudomonadaceae	Pseudomonas_D	Pseudomonas_D litoralis	Halopseudomonas litoralis
GCA_900105035.1	Bacteria	Bacteroidota	Bacteroidia	Flavobacteriales	Flavobacteriaceae	Gramella	Gramella echinicola	Gramella echinicola
GCA_900105105.1	Bacteria	Bacteroidota	Bacteroidia	Flavobacteriales	Flavobacteriaceae	Maribacter	Maribacter dokdonensis	Maribacter dokdonensis
GCA_900105135.1	Bacteria	Bacteroidota	Bacteroidia	Flavobacteriales	Flavobacteriaceae	Gramella	Gramella sp900105135	Gramella sp. MAR_2010_147
GCA_900105445.1	Bacteria	Actinobacteriota	Actinomycetia	Actinomycetales	Cellulomonadaceae	Paraoerskovia	Paraoerskovia marina	Paraoerskovia marina
GCA_900105595.1	Bacteria	Proteobacteria	Alphaproteobacteria	Rhizobiales	Stappiaceae	Stappia	Stappia sp900105595	Stappia sp. ES.058
GCA_900105865.1	Bacteria	Actinobacteriota	Actinomycetia	Actinomycetales	Actinomycetaceae	Arcanobacterium	Arcanobacterium phocae	Arcanobacterium phocae
GCA_900105995.1	Bacteria	Proteobacteria	Gammaproteobacteria	Pseudomonadales	Pseudomonadaceae	Pseudomonas_E	Pseudomonas_E pohangensis	Pseudomonas pohangensis
GCA_900106075.1	Bacteria	Bacteroidota	Bacteroidia	Flavobacteriales	Flavobacteriaceae	Polaribacter	Polaribacter sp900106075	Polaribacter sp. Hel1_33_78
GCA_900108535.1	Bacteria	Proteobacteria	Gammaproteobacteria	Pseudomonadales	Pseudomonadaceae	Pseudomonas_A	Pseudomonas_A xanthomarina	Pseudomonas xanthomarina
GCA_900119795.1	Bacteria	Bacteroidota	Bacteroidia	Flavobacteriales	Flavobacteriaceae	Tenacibaculum	Tenacibaculum maritimum	Tenacibaculum maritimum NCIMB 2154
GCA_900130145.1	Bacteria	Bacteroidota	Bacteroidia	Flavobacteriales	Flavobacteriaceae	Flavobacterium	Flavobacterium psychrophilum	Flavobacterium psychrophilum
GCA_900149685.1	Bacteria	Proteobacteria	Alphaproteobacteria	Sphingomonadales	Sphingomonadaceae	Erythrobacter	Erythrobacter sp900149685	Erythrobacter sp. Alg231-14
GCA_900149695.1	Bacteria	Proteobacteria	Alphaproteobacteria	Rhizobiales	Aestuariivirgaceae	Anderseniella	Anderseniella sp900149695	Anderseniella sp. Alg231-50
GCA_900149705.1	Bacteria	Proteobacteria	Alphaproteobacteria	Sphingomonadales	Sphingomonadaceae	Parasphingorhabdus	Parasphingorhabdus sp900149705	Sphingorhabdus sp. Alg231-15
GCA_900176595.1	Bacteria	Bacteroidota	Bacteroidia	Cytophagales	Cyclobacteriaceae	Aquiflexum	Aquiflexum balticum	Aquiflexum balticum DSM 16537
GCA_900188315.1	Bacteria	Proteobacteria	Gammaproteobacteria	Pseudomonadales	Oleiphilaceae	Marinobacter	Marinobacter sp900188315	Marinobacter sp. es.042
GCA_900198195.1	Bacteria	Bacteroidota	Bacteroidia	Flavobacteriales	Flavobacteriaceae	Tenacibaculum	Tenacibaculum jejuense	Tenacibaculum jejuense
GCA_900198835.1	Archaea	Methanobacteriota_B	Thermococci	Thermococcales	Thermococcaceae	Thermococcus	Thermococcus sp900198835	Thermococcus henrietii
GCA_900215505.1	Bacteria	Proteobacteria	Alphaproteobacteria	Rhizobiales	Cohaesibacteraceae	Cohaesibacter	Cohaesibacter sp900215505	Cohaesibacter sp. ES.047
GCA_900217235.1	Bacteria	Desulfobacterota_I	Desulfovibrionia	Desulfovibrionales	Desulfovibrionaceae	Pseudodesulfovibrio	Pseudodesulfovibrio profundus	Pseudodesulfovibrio profundus
GCA_900239935.1	Bacteria	Proteobacteria	Gammaproteobacteria	Enterobacterales	Alteromonadaceae	Pseudoalteromonas	Pseudoalteromonas carrageenovora	Pseudoalteromonas carrageenovora IAM 12662
GCA_900465055.1	Bacteria	Proteobacteria	Gammaproteobacteria	Enterobacterales	Moritellaceae	Moritella	Moritella yayanosii	Moritella yayanosii
GCA_900476435.1	Bacteria	Proteobacteria	Gammaproteobacteria	Enterobacterales	Shewanellaceae	Shewanella	Shewanella benthica_A	Shewanella benthica
GCA_900537175.1	Bacteria	Proteobacteria	Alphaproteobacteria	Rhizobiales	Rhizobiaceae	Lentilitoribacter	Lentilitoribacter sp900537175	Lentilitoribacter sp. Alg239-R112
GCA_900537185.1	Bacteria	Bacteroidota	Bacteroidia	Cytophagales	Cyclobacteriaceae	Alg240-R148	Alg240-R148 sp900537185	Cytophagales bacterium Alg240-R148
GCA_900538275.1	Bacteria	Firmicutes_A	Clostridia	Lachnospirales	Vallitaleaceae	Petrocella	Petrocella atlantisensis	Petrocella atlantisensis
GCA_900574125.1	Bacteria	Proteobacteria	Alphaproteobacteria	Rhodobacterales	Rhodobacteraceae	Epibacterium	Epibacterium mobile	Tritonibacter mobilis
GCA_900636325.1	Bacteria	Firmicutes	Bacilli	Staphylococcales	Staphylococcaceae	Staphylococcus	Staphylococcus delphini	Staphylococcus delphini
GCA_900637885.1	Bacteria	Campylobacterota	Campylobacteria	Campylobacterales	Campylobacteraceae	Campylobacter_D	Campylobacter_D insulaenigrae	Campylobacter insulaenigrae
GCA_900654235.1	Bacteria	Proteobacteria	Gammaproteobacteria	Enterobacterales	Alteromonadaceae	Alteromonas	Alteromonas naphthalenivorans	Alteromonas sp. 76-1
GCA_900682675.2	Bacteria	Proteobacteria	Gammaproteobacteria	Pseudomonadales	Pseudomonadaceae	Pseudomonas	Pseudomonas marincola	Pseudomonas marincola
GCA_903995135.1	Bacteria	Proteobacteria	Gammaproteobacteria	Enterobacterales	Alteromonadaceae	Pseudoalteromonas	Pseudoalteromonas undina	Pseudoalteromonas sp. 3J6
GCA_904067545.1	Archaea	Methanobacteriota_B	Thermococci	Thermococcales	Thermococcaceae	Thermococcus	Thermococcus camini	Thermococcus camini
GCA_904848165.1	Bacteria	Proteobacteria	Gammaproteobacteria	Pseudomonadales	Moraxellaceae	Psychrobacter	Psychrobacter arenosus	Psychrobacter arenosus
