# Supplementary material for: A Comprehensive Self-Resistance Gene Database for Natural-Product Discovery with an Application to Marine Bacterial Genome Mining
Source: Int J Mol Sci. 2023 Aug 4;24(15):12446. doi: 10.3390/ijms241512446 (PMC10419868; doi:10.3390/ijms241512446)
Supplement: Supplementary file 1 [file ijms-24-12446-s001.zip › Supplementary Table S3.xlsx]

## Sheet: ALL
Supplementary Table S3. Annotated Information of Resistance Gene of MarRef-BGCs
Marref_bgc_id	BGC_cds_id	Subject	Evalue	Bitscore	Resistance Machenism	Putative product class
CP011472.1.region001	CP0114720011	BGC0000001|EmrB/QacA_drug_resistance_transporter|AEK75506.1	6.52e-32	120	efflux pump	abyssomicin C/atrop-abyssomicin C
CP022099.1.region005	CP0220990013	BGC0000001|EmrB/QacA_drug_resistance_transporter|AEK75506.1	6.52e-32	120	efflux pump	abyssomicin C/atrop-abyssomicin C
CP002583.1.region002	CP0025830012	BGC0000001|EmrB/QacA_drug_resistance_transporter|AEK75506.1	7.81e-37	134	efflux pump	abyssomicin C/atrop-abyssomicin C
CP045325.1.region007	CP0453250035	BGC0000086|putative_resistance_protein|BAG85020.1	2.53e-33	126	efflux pump	lasalocid
CP054932.1.region006	CP0549320005	BGC0000100|putative_monensin_resistance_protein|AAO65793.1	5.35e-31	118	efflux pump	monensin
CP056041.1.region032	CP0560410059	BGC0000100|putative_monensin_resistance_protein|AAO65793.1	8.44e-32	121	efflux pump	monensin
CP014859.1.region006	CP0148590015	BGC0000212|daunorubicin_resistance_transmembrane_protein|EDY42516.1	3.07e-34	119	efflux pump	cinerubin B
CP054929.1.region010	CP0549290034	BGC0000212|daunorubicin_resistance_ATP-binding_protein_DrrA|EDY42517.2	1.14e-35	126	efflux pump	cinerubin B
CP006670.1.region001	CP0066700021	BGC0000212|daunorubicin_resistance_ATP-binding_protein_DrrA|EDY42517.2	3.96e-37	129	efflux pump	cinerubin B
AE009950.1.region001	AE0099500006	BGC0000212|daunorubicin_resistance_ATP-binding_protein_DrrA|EDY42517.2	1.85e-34	122	efflux pump	cinerubin B
CP023154.1.region002	CP0231540019	BGC0000212|daunorubicin_resistance_ATP-binding_protein_DrrA|EDY42517.2	1.85e-34	122	efflux pump	cinerubin B
CP014859.1.region005	CP0148590008	BGC0000275|tetracenomycin_C_resistance_and_export_gene_repressor|AAA67508.1	8.04e-31	106	efflux pump	tetracenomycin C
CP016353.1.region012	CP0163530019	BGC0000300|major_facilitator_superfamily_transporter_multidrug_resistance_protein|EFL06870.1	1.69e-111	325	efflux pump	amychelin
CP036455.1.region006	CP0364550028	BGC0000300|major_facilitator_superfamily_transporter_multidrug_resistance_protein|EFL06870.1	5.61e-98	292	efflux pump	amychelin
CP024315.1.region018	CP0243150029	BGC0000300|major_facilitator_superfamily_transporter_multidrug_resistance_protein|EFL06870.1	1.42e-74	231	efflux pump	amychelin
CP032153.1.region003	CP0321530015	BGC0000300|major_facilitator_superfamily_transporter_multidrug_resistance_protein|EFL06870.1	8.14e-82	250	efflux pump	amychelin
CP032521.1.region006	CP0325210015	BGC0000300|major_facilitator_superfamily_transporter_multidrug_resistance_protein|EFL06870.1	3.99e-81	248	efflux pump	amychelin
CP047670.1.region003	CP0476700017	BGC0000300|major_facilitator_superfamily_transporter_multidrug_resistance_protein|EFL06870.1	1.23e-83	254	efflux pump	amychelin
CP036455.1.region006	CP0364550016	BGC0000300|major_facilitator_superfamily_transporter_multidrug_resistance_protein|EFL06870.1	3.6e-62	199	efflux pump	amychelin
AP008957.1.region009	AP0089570025	BGC0000300|major_facilitator_superfamily_transporter_multidrug_resistance_protein|EFL06870.1	6.13e-68	214	efflux pump	amychelin
CP012749.1.region012	CP0127490024	BGC0000300|major_facilitator_superfamily_transporter_multidrug_resistance_protein|EFL06870.1	6.13e-68	214	efflux pump	amychelin
CP023720.1.region011	CP0237200017	BGC0000300|major_facilitator_superfamily_transporter_multidrug_resistance_protein|EFL06870.1	6.13e-68	214	efflux pump	amychelin
CP036455.1.region006	CP0364550014	BGC0000300|major_facilitator_superfamily_transporter_multidrug_resistance_protein|EFL06870.1	1.21e-60	196	efflux pump	amychelin
CP041244.1.region002	CP0412440013	BGC0000300|major_facilitator_superfamily_transporter_multidrug_resistance_protein|EFL06870.1	2.15e-55	181	efflux pump	amychelin
CP054932.1.region012	CP0549320022	BGC0000300|major_facilitator_superfamily_transporter_multidrug_resistance_protein|EFL06870.1	4.19e-56	183	efflux pump	amychelin
CP027796.1.region002	CP0277960021	BGC0000300|major_facilitator_superfamily_transporter_multidrug_resistance_protein|EFL06870.1	3.8e-61	197	efflux pump	amychelin
CP027798.1.region003	CP0277980015	BGC0000300|major_facilitator_superfamily_transporter_multidrug_resistance_protein|EFL06870.1	3.8e-61	197	efflux pump	amychelin
CP030092.1.region005	CP0300920014	BGC0000300|major_facilitator_superfamily_transporter_multidrug_resistance_protein|EFL06870.1	3.92e-43	149	efflux pump	amychelin
CP029495.1.region008	CP0294950020	BGC0000300|major_facilitator_superfamily_transporter_multidrug_resistance_protein|EFL06870.1	4.87e-52	172	efflux pump	amychelin
CP029554.1.region001	CP0295540025	BGC0000300|major_facilitator_superfamily_transporter_multidrug_resistance_protein|EFL06870.1	4.87e-52	172	efflux pump	amychelin
CP030923.1.region004	CP0309230016	BGC0000300|major_facilitator_superfamily_transporter_multidrug_resistance_protein|EFL06870.1	8.59e-45	153	efflux pump	amychelin
CP011078.1.region003	CP0110780011	BGC0000300|major_facilitator_superfamily_transporter_multidrug_resistance_protein|EFL06870.1	7.13e-53	175	efflux pump	amychelin
CP023184.1.region005	CP0231840012	BGC0000300|major_facilitator_superfamily_transporter_multidrug_resistance_protein|EFL06870.1	7.13e-53	175	efflux pump	amychelin
CP033466.1.region004	CP0334660016	BGC0000300|major_facilitator_superfamily_transporter_multidrug_resistance_protein|EFL06870.1	2.85e-43	149	efflux pump	amychelin
CP002771.1.region003	CP0027710018	BGC0000300|major_facilitator_superfamily_transporter_multidrug_resistance_protein|EFL06870.1	3.2e-56	184	efflux pump	amychelin
CP040263.1.region003	CP0402630014	BGC0000300|major_facilitator_superfamily_transporter_multidrug_resistance_protein|EFL06870.1	7.38e-45	153	efflux pump	amychelin
CP009539.1.region003	CP0095390012	BGC0000300|major_facilitator_superfamily_transporter_multidrug_resistance_protein|EFL06870.1	3.84e-51	170	efflux pump	amychelin
CP029241.1.region021	CP0292410013	BGC0000300|major_facilitator_superfamily_transporter_multidrug_resistance_protein|EFL06870.1	2.86e-44	153	efflux pump	amychelin
CP040269.1.region002	CP0402690014	BGC0000300|major_facilitator_superfamily_transporter_multidrug_resistance_protein|EFL06870.1	7.08e-44	150	efflux pump	amychelin
CP040443.1.region002	CP0404430024	BGC0000300|major_facilitator_superfamily_transporter_multidrug_resistance_protein|EFL06870.1	1.83e-43	149	efflux pump	amychelin
CP042994.1.region003	CP0429940027	BGC0000300|major_facilitator_superfamily_transporter_multidrug_resistance_protein|EFL06870.1	2.54e-54	178	efflux pump	amychelin
CP027796.1.region005	CP0277960021	BGC0000300|major_facilitator_superfamily_transporter_multidrug_resistance_protein|EFL06870.1	2.06e-44	152	efflux pump	amychelin
CP027798.1.region009	CP0277980019	BGC0000300|major_facilitator_superfamily_transporter_multidrug_resistance_protein|EFL06870.1	2.06e-44	152	efflux pump	amychelin
CP018835.1.region007	CP0188350015	BGC0000300|major_facilitator_superfamily_transporter_multidrug_resistance_protein|EFL06870.1	5.17e-56	183	efflux pump	amychelin
CP038469.1.region002	CP0384690014	BGC0000300|major_facilitator_superfamily_transporter_multidrug_resistance_protein|EFL06870.1	1.25e-43	150	efflux pump	amychelin
CP022101.1.region001	CP0221010019	BGC0000300|major_facilitator_superfamily_transporter_multidrug_resistance_protein|EFL06870.1	8.43e-51	170	efflux pump	amychelin
CP010084.1.region004	CP0100840016	BGC0000300|major_facilitator_superfamily_transporter_multidrug_resistance_protein|EFL06870.1	1.4e-49	166	efflux pump	amychelin
CP014040.1.region004	CP0140400018	BGC0000300|major_facilitator_superfamily_transporter_multidrug_resistance_protein|EFL06870.1	9.43e-55	180	efflux pump	amychelin
CP030789.1.region001	CP0307890036	BGC0000300|major_facilitator_superfamily_transporter_multidrug_resistance_protein|EFL06870.1	7.89e-55	180	efflux pump	amychelin
CP002583.1.region005	CP0025830019	BGC0000300|major_facilitator_superfamily_transporter_multidrug_resistance_protein|EFL06870.1	5.84e-54	178	efflux pump	amychelin
CP002284.1.region004	CP0022840017	BGC0000300|major_facilitator_superfamily_transporter_multidrug_resistance_protein|EFL06870.1	3.06e-49	166	efflux pump	amychelin
CP006699.1.region004	CP0066990016	BGC0000300|major_facilitator_superfamily_transporter_multidrug_resistance_protein|EFL06870.1	3.06e-49	166	efflux pump	amychelin
CP010030.1.region004	CP0100300016	BGC0000300|major_facilitator_superfamily_transporter_multidrug_resistance_protein|EFL06870.1	3.06e-49	166	efflux pump	amychelin
CP010032.1.region004	CP0100320016	BGC0000300|major_facilitator_superfamily_transporter_multidrug_resistance_protein|EFL06870.1	3.06e-49	166	efflux pump	amychelin
CP010034.1.region004	CP0100340016	BGC0000300|major_facilitator_superfamily_transporter_multidrug_resistance_protein|EFL06870.1	3.06e-49	166	efflux pump	amychelin
CP010036.1.region004	CP0100360016	BGC0000300|major_facilitator_superfamily_transporter_multidrug_resistance_protein|EFL06870.1	3.06e-49	166	efflux pump	amychelin
CP010038.1.region004	CP0100380016	BGC0000300|major_facilitator_superfamily_transporter_multidrug_resistance_protein|EFL06870.1	3.06e-49	166	efflux pump	amychelin
CP010040.1.region004	CP0100400016	BGC0000300|major_facilitator_superfamily_transporter_multidrug_resistance_protein|EFL06870.1	3.06e-49	166	efflux pump	amychelin
CP010042.1.region004	CP0100420016	BGC0000300|major_facilitator_superfamily_transporter_multidrug_resistance_protein|EFL06870.1	3.06e-49	166	efflux pump	amychelin
CP010044.1.region004	CP0100440016	BGC0000300|major_facilitator_superfamily_transporter_multidrug_resistance_protein|EFL06870.1	3.06e-49	166	efflux pump	amychelin
CP010046.1.region004	CP0100460016	BGC0000300|major_facilitator_superfamily_transporter_multidrug_resistance_protein|EFL06870.1	3.06e-49	166	efflux pump	amychelin
CP010076.1.region004	CP0100760016	BGC0000300|major_facilitator_superfamily_transporter_multidrug_resistance_protein|EFL06870.1	3.06e-49	166	efflux pump	amychelin
CP010078.1.region004	CP0100780016	BGC0000300|major_facilitator_superfamily_transporter_multidrug_resistance_protein|EFL06870.1	3.06e-49	166	efflux pump	amychelin
CP010082.1.region004	CP0100820016	BGC0000300|major_facilitator_superfamily_transporter_multidrug_resistance_protein|EFL06870.1	3.06e-49	166	efflux pump	amychelin
CP010291.1.region004	CP0102910016	BGC0000300|major_facilitator_superfamily_transporter_multidrug_resistance_protein|EFL06870.1	3.06e-49	166	efflux pump	amychelin
CP011458.1.region004	CP0114580017	BGC0000300|major_facilitator_superfamily_transporter_multidrug_resistance_protein|EFL06870.1	6.07e-49	165	efflux pump	amychelin
CP011460.1.region001	CP0114600021	BGC0000300|major_facilitator_superfamily_transporter_multidrug_resistance_protein|EFL06870.1	1.73e-49	166	efflux pump	amychelin
CP011462.1.region003	CP0114620015	BGC0000300|major_facilitator_superfamily_transporter_multidrug_resistance_protein|EFL06870.1	1.12e-49	167	efflux pump	amychelin
CP011464.1.region004	CP0114640016	BGC0000300|major_facilitator_superfamily_transporter_multidrug_resistance_protein|EFL06870.1	2.38e-49	166	efflux pump	amychelin
CP011466.1.region004	CP0114660016	BGC0000300|major_facilitator_superfamily_transporter_multidrug_resistance_protein|EFL06870.1	2.76e-49	166	efflux pump	amychelin
CP011470.1.region004	CP0114700016	BGC0000300|major_facilitator_superfamily_transporter_multidrug_resistance_protein|EFL06870.1	3.06e-49	166	efflux pump	amychelin
CP011472.1.region005	CP0114720015	BGC0000300|major_facilitator_superfamily_transporter_multidrug_resistance_protein|EFL06870.1	1.12e-49	167	efflux pump	amychelin
CP011475.1.region004	CP0114750016	BGC0000300|major_facilitator_superfamily_transporter_multidrug_resistance_protein|EFL06870.1	3.06e-49	166	efflux pump	amychelin
CP016095.1.region001	CP0160950026	BGC0000300|major_facilitator_superfamily_transporter_multidrug_resistance_protein|EFL06870.1	3.06e-49	166	efflux pump	amychelin
CP020534.1.region004	CP0205340016	BGC0000300|major_facilitator_superfamily_transporter_multidrug_resistance_protein|EFL06870.1	3.06e-49	166	efflux pump	amychelin
CP022099.1.region001	CP0220990021	BGC0000300|major_facilitator_superfamily_transporter_multidrug_resistance_protein|EFL06870.1	1.12e-49	167	efflux pump	amychelin
CP022103.1.region001	CP0221030021	BGC0000300|major_facilitator_superfamily_transporter_multidrug_resistance_protein|EFL06870.1	2.76e-49	166	efflux pump	amychelin
CP023054.1.region001	CP0230540021	BGC0000300|major_facilitator_superfamily_transporter_multidrug_resistance_protein|EFL06870.1	1.12e-49	167	efflux pump	amychelin
CP023208.1.region004	CP0232080016	BGC0000300|major_facilitator_superfamily_transporter_multidrug_resistance_protein|EFL06870.1	3.06e-49	166	efflux pump	amychelin
CP023289.1.region004	CP0232890016	BGC0000300|major_facilitator_superfamily_transporter_multidrug_resistance_protein|EFL06870.1	2.76e-49	166	efflux pump	amychelin
CP023291.1.region004	CP0232910016	BGC0000300|major_facilitator_superfamily_transporter_multidrug_resistance_protein|EFL06870.1	2.76e-49	166	efflux pump	amychelin
CP023293.1.region004	CP0232930016	BGC0000300|major_facilitator_superfamily_transporter_multidrug_resistance_protein|EFL06870.1	2.76e-49	166	efflux pump	amychelin
CP023310.1.region001	CP0233100021	BGC0000300|major_facilitator_superfamily_transporter_multidrug_resistance_protein|EFL06870.1	4.45e-49	165	efflux pump	amychelin
CP023433.1.region004	CP0234330016	BGC0000300|major_facilitator_superfamily_transporter_multidrug_resistance_protein|EFL06870.1	2.76e-49	166	efflux pump	amychelin
LK021130.1.region001	LK0211300021	BGC0000300|major_facilitator_superfamily_transporter_multidrug_resistance_protein|EFL06870.1	3.06e-49	166	efflux pump	amychelin
CP040656.1.region003	CP0406560003	BGC0000300|major_facilitator_superfamily_transporter_multidrug_resistance_protein|EFL06870.1	1.28e-39	139	efflux pump	amychelin
AP018165.1.region004	AP0181650016	BGC0000300|major_facilitator_superfamily_transporter_multidrug_resistance_protein|EFL06870.1	2.93e-46	158	efflux pump	amychelin
CP007220.1.region005	CP0072200016	BGC0000300|major_facilitator_superfamily_transporter_multidrug_resistance_protein|EFL06870.1	1.19e-44	153	efflux pump	amychelin
CP017718.1.region002	CP0177180006	BGC0000300|major_facilitator_superfamily_transporter_multidrug_resistance_protein|EFL06870.1	1.27e-32	120	efflux pump	amychelin
LT629302.1.region003	LT6293020001	BGC0000300|major_facilitator_superfamily_transporter_multidrug_resistance_protein|EFL06870.1	4.09e-40	140	efflux pump	amychelin
CP047028.1.region002	CP0470280013	BGC0000300|major_facilitator_superfamily_transporter_multidrug_resistance_protein|EFL06870.1	8.11e-33	120	efflux pump	amychelin
CP018047.1.region006	CP0180470022	BGC0000327|putative_netropsin_resistance_protein_subunit_1|CAJ88628.1	2.76e-32	124	efflux pump	netropsin
CP034587.1.region033	CP0345870051	BGC0000327|putative_netropsin_resistance_protein_subunit_1|CAJ88628.1	3.04e-33	127	efflux pump	netropsin
AP019701.1.region003	AP0197010018	BGC0000327|putative_netropsin_resistance_protein_subunit_2|CAJ88629.1	2.61e-32	124	efflux pump	netropsin
CP036455.1.region010	CP0364550006	BGC0000327|putative_netropsin_resistance_protein_subunit_2|CAJ88629.1	1.55e-35	134	efflux pump	netropsin
CP018047.1.region006	CP0180470062	BGC0000327|putative_netropsin_resistance_protein_subunit_2|CAJ88629.1	2.5e-32	124	efflux pump	netropsin
CP024052.1.region007	CP0240520005	BGC0000333|daunorubicin_resistance_ABC_transporter_ATPase_subunit|ABW00319.1	1.48e-32	114	efflux pump	cyclomarin D
CP054932.1.region012	CP0549320010	BGC0000333|daunorubicin_resistance_ABC_transporter_ATPase_subunit|ABW00319.1	3.28e-31	110	efflux pump	cyclomarin D
CP008849.1.region002	CP0088490005	BGC0000333|daunorubicin_resistance_ABC_transporter_ATPase_subunit|ABW00319.1	9.22e-31	109	efflux pump	cyclomarin D
CP014470.1.region001	CP0144700015	BGC0000333|daunorubicin_resistance_ABC_transporter_ATPase_subunit|ABW00319.1	4.8e-35	123	efflux pump	cyclomarin D
CP003154.1.region004	CP0031540003	BGC0000333|daunorubicin_resistance_ABC_transporter_ATPase_subunit|ABW00319.1	1.29e-31	111	efflux pump	cyclomarin D
CP019935.1.region006	CP0199350008	BGC0000333|daunorubicin_resistance_ABC_transporter_ATPase_subunit|ABW00319.1	1.29e-36	126	efflux pump	cyclomarin D
CP036298.1.region002	CP0362980001	BGC0000333|daunorubicin_resistance_ABC_transporter_ATPase_subunit|ABW00319.1	1.73e-33	119	efflux pump	cyclomarin D
CP041169.1.region004	CP0411690005	BGC0000379|Daunorubicin_resistance_ABC_transporter_ATPase_subunit|AEG64685.1	4.05e-31	111	efflux pump	glycinocin A
CP018029.1.region003	CP0180290005	BGC0000379|Daunorubicin_resistance_ABC_transporter_ATPase_subunit|AEG64685.1	3.36e-31	111	efflux pump	glycinocin A
CP004393.1.region003	CP0043930033	BGC0000392|drug_resistance_transporter,_EmrB/QacA_subfamily|ACU36653.1	4.03e-37	135	efflux pump	mirubactin
CP040656.1.region007	CP0406560027	BGC0000437|Acriflavin_resistance_protein|AAY37661.1	2.1e-37	141	efflux pump	syringomycin
CP029241.1.region015	CP0292410040	BGC0000579|daunorubicin_resistance_protein_DrrA_family_ABC_transporter_ATP-binding_protein|WP_007385816.1	2.42e-40	136	efflux pump	SSV-2083
CP002339.1.region001	CP0023390011	BGC0000579|daunorubicin_resistance_protein_DrrA_family_ABC_transporter_ATP-binding_protein|WP_007385816.1	1.7e-44	145	efflux pump	SSV-2083
CP013120.1.region001	CP0131200012	BGC0000579|daunorubicin_resistance_protein_DrrA_family_ABC_transporter_ATP-binding_protein|WP_007385816.1	6.53e-43	141	efflux pump	SSV-2083
CP015345.1.region002	CP0153450012	BGC0000579|daunorubicin_resistance_protein_DrrA_family_ABC_transporter_ATP-binding_protein|WP_007385816.1	6.53e-43	141	efflux pump	SSV-2083
CP015346.1.region003	CP0153460005	BGC0000579|daunorubicin_resistance_protein_DrrA_family_ABC_transporter_ATP-binding_protein|WP_007385816.1	6.46e-43	141	efflux pump	SSV-2083
LR136958.1.region004	LR1369580005	BGC0000579|daunorubicin_resistance_protein_DrrA_family_ABC_transporter_ATP-binding_protein|WP_007385816.1	9.87e-45	146	efflux pump	SSV-2083
CM002271.1.region023	CM0022710022	BGC0000579|daunorubicin_resistance_protein_DrrA_family_ABC_transporter_ATP-binding_protein|WP_007385816.1	5.51e-31	114	efflux pump	SSV-2083
CM002273.1.region024	CM0022730023	BGC0000579|daunorubicin_resistance_protein_DrrA_family_ABC_transporter_ATP-binding_protein|WP_007385816.1	5.51e-31	114	efflux pump	SSV-2083
CP000806.1.region003	CP0008060034	BGC0000579|daunorubicin_resistance_protein_DrrA_family_ABC_transporter_ATP-binding_protein|WP_007385816.1	9.12e-36	124	efflux pump	SSV-2083
CP064783.1.region017	CP0647830026	BGC0000579|daunorubicin_resistance_protein_DrrA_family_ABC_transporter_ATP-binding_protein|WP_007385816.1	5.45e-31	114	efflux pump	SSV-2083
CP017599.1.region015	CP0175990019	BGC0000579|daunorubicin_resistance_protein_DrrA_family_ABC_transporter_ATP-binding_protein|WP_007385816.1	5.48e-31	117	efflux pump	SSV-2083
CP017708.1.region019	CP0177080022	BGC0000579|daunorubicin_resistance_protein_DrrA_family_ABC_transporter_ATP-binding_protein|WP_007385816.1	5.52e-31	117	efflux pump	SSV-2083
CP035928.1.region002	CP0359280005	BGC0000579|daunorubicin_resistance_protein_DrrA_family_ABC_transporter_ATP-binding_protein|WP_007385816.1	5.61e-39	131	efflux pump	SSV-2083
CP040360.1.region003	CP0403600032	BGC0000579|daunorubicin_resistance_protein_DrrA_family_ABC_transporter_ATP-binding_protein|WP_007385816.1	3.18e-36	124	efflux pump	SSV-2083
CP000951.1.region003	CP0009510034	BGC0000579|daunorubicin_resistance_protein_DrrA_family_ABC_transporter_ATP-binding_protein|WP_007385816.1	5.22e-35	121	efflux pump	SSV-2083
CP003844.1.region004	CP0038440005	BGC0000579|daunorubicin_resistance_protein_DrrA_family_ABC_transporter_ATP-binding_protein|WP_007385816.1	2.17e-42	140	efflux pump	SSV-2083
CP003845.1.region002	CP0038450004	BGC0000579|daunorubicin_resistance_protein_DrrA_family_ABC_transporter_ATP-binding_protein|WP_007385816.1	1.83e-42	140	efflux pump	SSV-2083
CP018026.1.region003	CP0180260004	BGC0000579|daunorubicin_resistance_protein_DrrA_family_ABC_transporter_ATP-binding_protein|WP_007385816.1	3.07e-43	142	efflux pump	SSV-2083
CP018027.1.region003	CP0180270004	BGC0000579|daunorubicin_resistance_protein_DrrA_family_ABC_transporter_ATP-binding_protein|WP_007385816.1	3.07e-43	142	efflux pump	SSV-2083
CP031967.1.region002	CP0319670013	BGC0000579|daunorubicin_resistance_protein_DrrA_family_ABC_transporter_ATP-binding_protein|WP_007385816.1	1.07e-42	140	efflux pump	SSV-2083
CP032618.1.region003	CP0326180010	BGC0000579|daunorubicin_resistance_protein_DrrA_family_ABC_transporter_ATP-binding_protein|WP_007385816.1	1.28e-32	115	efflux pump	SSV-2083
CP034425.1.region010	CP0344250003	BGC0000579|daunorubicin_resistance_protein_DrrA_family_ABC_transporter_ATP-binding_protein|WP_007385816.1	3.55e-33	116	efflux pump	SSV-2083
CP000644.1.region001	CP0006440035	BGC0000579|daunorubicin_resistance_protein_DrrA_family_ABC_transporter_ATP-binding_protein|WP_007385816.1	1.83e-33	120	efflux pump	SSV-2083
CP022175.1.region003	CP0221750010	BGC0000579|daunorubicin_resistance_protein_DrrA_family_ABC_transporter_ATP-binding_protein|WP_007385816.1	1.11e-33	121	efflux pump	SSV-2083
CP022181.1.region003	CP0221810010	BGC0000579|daunorubicin_resistance_protein_DrrA_family_ABC_transporter_ATP-binding_protein|WP_007385816.1	1.11e-33	121	efflux pump	SSV-2083
CP022186.1.region003	CP0221860010	BGC0000579|daunorubicin_resistance_protein_DrrA_family_ABC_transporter_ATP-binding_protein|WP_007385816.1	1.11e-33	121	efflux pump	SSV-2083
CP046954.1.region001	CP0469540033	BGC0000579|daunorubicin_resistance_protein_DrrA_family_ABC_transporter_ATP-binding_protein|WP_007385816.1	9.27e-33	119	efflux pump	SSV-2083
CP004848.1.region002	CP0048480004	BGC0000579|daunorubicin_resistance_protein_DrrA_family_ABC_transporter_ATP-binding_protein|WP_007385816.1	1.19e-42	140	efflux pump	SSV-2083
CP018024.1.region004	CP0180240005	BGC0000579|daunorubicin_resistance_protein_DrrA_family_ABC_transporter_ATP-binding_protein|WP_007385816.1	1.85e-42	140	efflux pump	SSV-2083
CP041170.1.region002	CP0411700005	BGC0000579|daunorubicin_resistance_protein_DrrA_family_ABC_transporter_ATP-binding_protein|WP_007385816.1	1.68e-42	140	efflux pump	SSV-2083
CP046140.1.region001	CP0461400012	BGC0000579|daunorubicin_resistance_protein_DrrA_family_ABC_transporter_ATP-binding_protein|WP_007385816.1	2.38e-43	142	efflux pump	SSV-2083
CP046670.1.region004	CP0466700004	BGC0000579|daunorubicin_resistance_protein_DrrA_family_ABC_transporter_ATP-binding_protein|WP_007385816.1	3.76e-42	139	efflux pump	SSV-2083
CP003841.1.region004	CP0038410004	BGC0000579|daunorubicin_resistance_protein_DrrA_family_ABC_transporter_ATP-binding_protein|WP_007385816.1	4.98e-40	134	efflux pump	SSV-2083
CP028901.1.region001	CP0289010017	BGC0000579|daunorubicin_resistance_protein_DrrA_family_ABC_transporter_ATP-binding_protein|WP_007385816.1	2.67e-32	117	efflux pump	SSV-2083
CP004846.1.region003	CP0048460004	BGC0000579|daunorubicin_resistance_protein_DrrA_family_ABC_transporter_ATP-binding_protein|WP_007385816.1	2.68e-42	140	efflux pump	SSV-2083
CP003873.1.region002	CP0038730004	BGC0000579|daunorubicin_resistance_protein_DrrA_family_ABC_transporter_ATP-binding_protein|WP_007385816.1	1.78e-40	135	efflux pump	SSV-2083
CP018023.1.region003	CP0180230005	BGC0000579|daunorubicin_resistance_protein_DrrA_family_ABC_transporter_ATP-binding_protein|WP_007385816.1	1.82e-40	135	efflux pump	SSV-2083
CP032363.1.region001	CP0323630016	BGC0000579|daunorubicin_resistance_protein_DrrA_family_ABC_transporter_ATP-binding_protein|WP_007385816.1	1.24e-39	132	efflux pump	SSV-2083
CP002663.1.region001	CP0026630018	BGC0000579|daunorubicin_resistance_protein_DrrA_family_ABC_transporter_ATP-binding_protein|WP_007385816.1	3.98e-32	116	efflux pump	SSV-2083
CP032153.1.region005	CP0321530018	BGC0000579|daunorubicin_resistance_protein_DrrA_family_ABC_transporter_ATP-binding_protein|WP_007385816.1	1.61e-33	120	efflux pump	SSV-2083
CP032521.1.region007	CP0325210018	BGC0000579|daunorubicin_resistance_protein_DrrA_family_ABC_transporter_ATP-binding_protein|WP_007385816.1	1.61e-33	120	efflux pump	SSV-2083
CP047670.1.region004	CP0476700017	BGC0000579|daunorubicin_resistance_protein_DrrA_family_ABC_transporter_ATP-binding_protein|WP_007385816.1	2.7e-33	120	efflux pump	SSV-2083
CP054932.1.region008	CP0549320001	BGC0000579|daunorubicin_resistance_protein_DrrA_family_ABC_transporter_ATP-binding_protein|WP_007385816.1	9.27e-31	111	efflux pump	SSV-2083
CP001978.1.region001	CP0019780006	BGC0000579|daunorubicin_resistance_protein_DrrA_family_ABC_transporter_ATP-binding_protein|WP_007385816.1	7.29e-34	120	efflux pump	SSV-2083
CP011929.1.region005	CP0119290005	BGC0000579|daunorubicin_resistance_protein_DrrA_family_ABC_transporter_ATP-binding_protein|WP_007385816.1	9.84e-34	119	efflux pump	SSV-2083
CP009539.1.region002	CP0095390020	BGC0000806|EmrB/QacA_subfamily_drug_resistance_transporter|AHL24451.1	1.42e-31	120	efflux pump	phosphonoglycans
CP011078.1.region002	CP0110780021	BGC0000806|EmrB/QacA_subfamily_drug_resistance_transporter|AHL24451.1	2.33e-32	122	efflux pump	phosphonoglycans
CP023184.1.region004	CP0231840020	BGC0000806|EmrB/QacA_subfamily_drug_resistance_transporter|AHL24451.1	3.01e-32	122	efflux pump	phosphonoglycans
CP025407.1.region008	CP0254070012	BGC0000872|putative_ABC_multidrug_resistance_transporter|BAJ05895.1	7.99e-33	127	efflux pump	A-90289 A/A-90289 B
CP046104.1.region013	CP0461040013	BGC0000872|putative_ABC_multidrug_resistance_transporter|BAJ05895.1	1.78e-34	132	efflux pump	A-90289 A/A-90289 B
CP016076.1.region013	CP0160760010	BGC0000872|putative_ABC_multidrug_resistance_transporter|BAJ05895.1	1.06e-35	138	efflux pump	A-90289 A/A-90289 B
CP016077.1.region013	CP0160770010	BGC0000872|putative_ABC_multidrug_resistance_transporter|BAJ05895.1	1.06e-35	138	efflux pump	A-90289 A/A-90289 B
CP002638.1.region015	CP0026380012	BGC0000872|putative_ABC_multidrug_resistance_transporter|BAJ05895.1	2.01e-33	129	efflux pump	A-90289 A/A-90289 B
CP028158.1.region004	CP0281580011	BGC0000872|putative_ABC_multidrug_resistance_transporter|BAJ05895.1	3.36e-31	122	efflux pump	A-90289 A/A-90289 B
CP028159.1.region002	CP0281590011	BGC0000872|putative_ABC_multidrug_resistance_transporter|BAJ05895.1	3.42e-31	122	efflux pump	A-90289 A/A-90289 B
CP056041.1.region009	CP0560410012	BGC0000872|putative_ABC_multidrug_resistance_transporter|BAJ05895.1	3.39e-33	128	efflux pump	A-90289 A/A-90289 B
CP021707.1.region016	CP0217070012	BGC0000872|putative_ABC_multidrug_resistance_transporter|BAJ05895.1	3.55e-32	125	efflux pump	A-90289 A/A-90289 B
CP020570.1.region021	CP0205700012	BGC0000872|putative_ABC_multidrug_resistance_transporter|BAJ05895.1	2.95e-31	123	efflux pump	A-90289 A/A-90289 B
CP029052.1.region009	CP0290520006	BGC0000914|methylenomycin_A_resistance_protein,_Mmr|CAC36763.1	8.57e-61	189	efflux pump	methylenomycin A
CP009266.2.region001	CP0092660022	BGC0000955|drug_resistance_transporter|CCA29199.1	3.89e-32	119	efflux pump	althiomycin
LT598496.1.region004	LT5984960008	BGC0001011|drug_resistance_related_regulator|ABC87517.1	8.02e-43	133	efflux pump	meridamycin
CP046104.1.region012	CP0461040004	BGC0001011|drug_resistance_related_regulator|ABC87517.1	7.6e-39	123	efflux pump	meridamycin
CP041244.1.region004	CP0412440006	BGC0001011|drug_resistance_related_regulator|ABC87524.1	2.83e-62	186	efflux pump	meridamycin
CP028158.1.region008	CP0281580005	BGC0001228|daunorubicin_resistance_protein_DrrA_family_ABC_transporter_ATP-binding_protein|WP_028678143.1	3.38e-32	113	efflux pump	retimycin A
CP071798.1.region002	CP0717980011	BGC0001228|daunorubicin_resistance_protein_DrrA_family_ABC_transporter_ATP-binding_protein|WP_028678143.1	1.25e-31	113	efflux pump	retimycin A
CP033581.1.region026	CP0335810029	BGC0001377|tetracenomycin_c_resistance_and_export_protein|AMK92567.1	1.14e-33	127	efflux pump	uncialamycin
CR522870.1.region001	CR5228700061	BGC0001377|tetracenomycin_c_resistance_and_export_protein|AMK92567.1	2.68e-32	122	efflux pump	uncialamycin
CP030924.1.region001	CP0309240008	BGC0001499|multidrug_resistance_protein_MdtG|AWD37847.1	1.46e-166	466	efflux pump	aerobactin
CP033466.1.region001	CP0334660007	BGC0001499|multidrug_resistance_protein_MdtG|AWD37847.1	5.76e-110	322	efflux pump	aerobactin
CP043420.1.region002	CP0434200004	BGC0001499|multidrug_resistance_protein_MdtG|AWD37847.1	1.81e-51	171	efflux pump	aerobactin
CP039517.1.region001	CP0395170009	BGC0001499|multidrug_resistance_protein_MdtG|AWD37847.1	9.64e-53	174	efflux pump	aerobactin
CP003029.1.region001	CP0030290004	BGC0001519|daunorubicin_resistance_protein_DrrA_family_ABC_transporter_ATP-binding_protein|WP_016638473.1	1.44e-32	114	efflux pump	aurantimycin A
CP001807.1.region003	CP0018070020	BGC0001519|daunorubicin_resistance_protein_DrrA_family_ABC_transporter_ATP-binding_protein|WP_016638473.1	4.81e-31	110	efflux pump	aurantimycin A
CP044407.1.region023	CP0444070022	BGC0001558|daunorubicin_resistance_protein_DrrA_family_ABC_transporter_ATP-binding_protein|WP_017947388.1	6.16e-33	115	efflux pump	cosmomycin C
AP018437.1.region001	AP0184370030	BGC0001558|daunorubicin_resistance_protein_DrrA_family_ABC_transporter_ATP-binding_protein|WP_017947388.1	8.88e-34	123	efflux pump	cosmomycin C
CP032125.1.region001	CP0321250007	BGC0001558|daunorubicin_resistance_protein_DrrA_family_ABC_transporter_ATP-binding_protein|WP_017947388.1	8.34e-33	115	efflux pump	cosmomycin C
LR884459.1.region001	LR8844590014	BGC0001558|daunorubicin_resistance_protein_DrrA_family_ABC_transporter_ATP-binding_protein|WP_017947388.1	2.73e-32	115	efflux pump	cosmomycin C
CP054939.1.region014	CP0549390001	BGC0001655|daunorubicin_resistance_protein_DrrA_family_ABC_transporter_ATP-binding_protein|WP_017534155.1	3.13e-34	119	efflux pump	LP2006
CP041244.1.region024	CP0412440003	BGC0001655|daunorubicin_resistance_protein_DrrA_family_ABC_transporter_ATP-binding_protein|WP_017534155.1	1.91e-32	120	efflux pump	LP2006
CP016545.1.region002	CP0165450022	BGC0001655|daunorubicin_resistance_protein_DrrA_family_ABC_transporter_ATP-binding_protein|WP_017534155.1	2.62e-31	109	efflux pump	LP2006
CP030885.1.region005	CP0308850034	BGC0001655|daunorubicin_resistance_protein_DrrA_family_ABC_transporter_ATP-binding_protein|WP_017534155.1	3.93e-33	122	efflux pump	LP2006
CP033581.1.region027	CP0335810002	BGC0001655|daunorubicin_resistance_protein_DrrA_family_ABC_transporter_ATP-binding_protein|WP_017534155.1	4.57e-33	115	efflux pump	LP2006
CT971583.1.region003	CT9715830007	BGC0001655|daunorubicin_resistance_protein_DrrA_family_ABC_transporter_ATP-binding_protein|WP_017534155.1	3.53e-32	112	efflux pump	LP2006
CP015163.1.region001	CP0151630001	BGC0001655|daunorubicin_resistance_protein_DrrA_family_ABC_transporter_ATP-binding_protein|WP_017534155.1	6.74e-32	112	efflux pump	LP2006
CP014796.1.region005	CP0147960030	BGC0001655|daunorubicin_resistance_protein_DrrA_family_ABC_transporter_ATP-binding_protein|WP_017534155.1	2.72e-33	119	efflux pump	LP2006
CP017708.1.region015	CP0177080009	BGC0001655|daunorubicin_resistance_protein_DrrA_family_ABC_transporter_ATP-binding_protein|WP_017534155.1	3.44e-31	110	efflux pump	LP2006
CP056041.1.region043	CP0560410012	BGC0001655|daunorubicin_resistance_protein_DrrA_family_ABC_transporter_ATP-binding_protein|WP_017534155.1	3.79e-32	114	efflux pump	LP2006
AP017959.1.region001	AP0179590003	BGC0001655|daunorubicin_resistance_protein_DrrA_family_ABC_transporter_ATP-binding_protein|WP_017534155.1	3.12e-34	119	efflux pump	LP2006
CP015039.1.region001	CP0150390004	BGC0001655|daunorubicin_resistance_protein_DrrA_family_ABC_transporter_ATP-binding_protein|WP_017534155.1	4.42e-31	111	efflux pump	LP2006
CP065915.1.region002	CP0659150009	BGC0001655|daunorubicin_resistance_protein_DrrA_family_ABC_transporter_ATP-binding_protein|WP_017534155.1	1.76e-31	114	efflux pump	LP2006
CP040747.1.region002	CP0407470015	BGC0001655|daunorubicin_resistance_protein_DrrA_family_ABC_transporter_ATP-binding_protein|WP_017534155.1	1.24e-35	125	efflux pump	LP2006
CP022242.1.region001	CP0222420016	BGC0001655|daunorubicin_resistance_protein_DrrA_family_ABC_transporter_ATP-binding_protein|WP_017534155.1	3.13e-32	113	efflux pump	LP2006
CP045351.1.region002	CP0453510012	BGC0001655|daunorubicin_resistance_protein_DrrA_family_ABC_transporter_ATP-binding_protein|WP_017534155.1	4.45e-31	114	efflux pump	LP2006
CP018197.1.region002	CP0181970015	BGC0001655|daunorubicin_resistance_protein_DrrA_family_ABC_transporter_ATP-binding_protein|WP_017534155.1	1.67e-35	125	efflux pump	LP2006
CP046103.1.region003	CP0461030010	BGC0001655|daunorubicin_resistance_protein_DrrA_family_ABC_transporter_ATP-binding_protein|WP_017534155.1	2.26e-33	116	efflux pump	LP2006
CP045119.1.region006	CP0451190003	BGC0001655|daunorubicin_resistance_protein_DrrA_family_ABC_transporter_ATP-binding_protein|WP_017534155.1	4.3e-33	116	efflux pump	LP2006
CP051461.1.region003	CP0514610004	BGC0001655|daunorubicin_resistance_protein_DrrA_family_ABC_transporter_ATP-binding_protein|WP_017534155.1	4.56e-33	115	efflux pump	LP2006
CP021112.1.region005	CP0211120019	BGC0001655|daunorubicin_resistance_protein_DrrA_family_ABC_transporter_ATP-binding_protein|WP_017534155.1	2.89e-34	119	efflux pump	LP2006
LS999833.1.region002	LS9998330010	BGC0001655|daunorubicin_resistance_protein_DrrA_family_ABC_transporter_ATP-binding_protein|WP_017534155.1	5.76e-31	109	efflux pump	LP2006
CP021780.1.region001	CP0217800014	BGC0001655|daunorubicin_resistance_protein_DrrA_family_ABC_transporter_ATP-binding_protein|WP_017534155.1	2.64e-32	114	efflux pump	LP2006
CP015163.1.region001	CP0151630002	BGC0001658|Daunorubicin/doxorubicin_resistance_ATP-binding_protein_DrrA|OAP25822.1	1.77e-34	119	efflux pump	macrotermycins
AP017900.1.region013	AP0179000008	BGC0001658|Daunorubicin/doxorubicin_resistance_ABC_transporter_permease_protein_DrrB|OAP25823.1	1.03e-63	194	efflux pump	macrotermycins
CP017839.1.region018	CP0178390001	BGC0001658|Daunorubicin/doxorubicin_resistance_ABC_transporter_permease_protein_DrrB|OAP25823.1	1.03e-63	194	efflux pump	macrotermycins
CP011492.1.region017	CP0114920014	BGC0001658|Daunorubicin/doxorubicin_resistance_ABC_transporter_permease_protein_DrrB|OAP25823.1	6.58e-53	167	efflux pump	macrotermycins
CP044407.1.region006	CP0444070001	BGC0001658|Daunorubicin/doxorubicin_resistance_ABC_transporter_permease_protein_DrrB|OAP25823.1	2.03e-40	135	efflux pump	macrotermycins
CP056041.1.region004	CP0560410028	BGC0001658|Daunorubicin/doxorubicin_resistance_ABC_transporter_permease_protein_DrrB|OAP25823.1	4.33e-37	126	efflux pump	macrotermycins
CP029241.1.region009	CP0292410022	BGC0001658|Daunorubicin/doxorubicin_resistance_ABC_transporter_permease_protein_DrrB|OAP25823.1	3.95e-48	154	efflux pump	macrotermycins
CP043317.1.region024	CP0433170018	BGC0001658|Daunorubicin/doxorubicin_resistance_ABC_transporter_permease_protein_DrrB|OAP25823.1	4.45e-31	110	efflux pump	macrotermycins
CP029188.1.region023	CP0291880059	BGC0001658|Daunorubicin/doxorubicin_resistance_ABC_transporter_permease_protein_DrrB|OAP25823.1	2.34e-34	119	efflux pump	macrotermycins
CP016076.1.region006	CP0160760015	BGC0001658|Daunorubicin/doxorubicin_resistance_ABC_transporter_permease_protein_DrrB|OAP25823.1	1.74e-31	112	efflux pump	macrotermycins
CP016077.1.region006	CP0160770015	BGC0001658|Daunorubicin/doxorubicin_resistance_ABC_transporter_permease_protein_DrrB|OAP25823.1	9.43e-32	112	efflux pump	macrotermycins
CP010869.1.region003	CP0108690005	BGC0001783|drug_resistance_transporter|AFW04581.1	5.15e-34	125	efflux pump	streptonigrin
CP054929.1.region013	CP0549290012	BGC0001972|putative_multidrug_resistance_efflux_protein|AZS52679.1	1.97e-62	205	efflux pump	toxoflavin
CP021121.1.region020	CP0211210022	BGC0001972|putative_multidrug_resistance_efflux_protein|AZS52679.1	1.65e-57	191	efflux pump	toxoflavin
CP029254.1.region007	CP0292540006	BGC0001972|putative_multidrug_resistance_efflux_protein|AZS52679.1	2.25e-57	192	efflux pump	toxoflavin
CP041244.1.region012	CP0412440023	BGC0000240|glyoxalase/bleomycin_resistance_protein|AHZ61839.1	8.2e-42	130	product inactivate	lomaiviticin A/lomaiviticin C/lomaiviticin D/lomaiviticin E
CP054929.1.region004	CP0549290011	BGC0000240|glyoxalase/bleomycin_resistance_protein|AHZ61839.1	5.8e-42	130	product inactivate	lomaiviticin A/lomaiviticin C/lomaiviticin D/lomaiviticin E
CP036455.1.region012	CP0364550013	BGC0000240|glyoxalase/bleomycin_resistance_protein|AHZ61839.1	1.27e-32	107	product inactivate	lomaiviticin A/lomaiviticin C/lomaiviticin D/lomaiviticin E
CP029843.1.region001	CP0298430011	BGC0000240|glyoxalase/bleomycin_resistance_protein|AHZ61839.1	6.11e-41	128	product inactivate	lomaiviticin A/lomaiviticin C/lomaiviticin D/lomaiviticin E
CP003169.1.region015	CP0031690039	BGC0000240|glyoxalase/bleomycin_resistance_protein|AHZ61839.1	1.15e-39	125	product inactivate	lomaiviticin A/lomaiviticin C/lomaiviticin D/lomaiviticin E
AP017900.1.region011	AP0179000010	BGC0000240|glyoxalase/bleomycin_resistance_protein|AHZ61839.1	2.94e-38	121	product inactivate	lomaiviticin A/lomaiviticin C/lomaiviticin D/lomaiviticin E
CP017839.1.region020	CP0178390028	BGC0000240|glyoxalase/bleomycin_resistance_protein|AHZ61839.1	2.5e-38	121	product inactivate	lomaiviticin A/lomaiviticin C/lomaiviticin D/lomaiviticin E
CP007220.1.region018	CP0072200025	BGC0000240|glyoxalase/bleomycin_resistance_protein|AHZ61839.1	6.08e-41	128	product inactivate	lomaiviticin A/lomaiviticin C/lomaiviticin D/lomaiviticin E
CP024087.1.region009	CP0240870015	BGC0000240|glyoxalase/bleomycin_resistance_protein|AHZ61839.1	7.36e-39	123	product inactivate	lomaiviticin A/lomaiviticin C/lomaiviticin D/lomaiviticin E
CP000667.1.region006	CP0006670020	BGC0000240|glyoxalase/bleomycin_resistance_protein|AHZ61839.1	3.23e-41	129	product inactivate	lomaiviticin A/lomaiviticin C/lomaiviticin D/lomaiviticin E
AP018410.1.region020	AP0184100028	BGC0000240|EmrB/QacA_family_drug_resistance_transporter|AHZ61835.1	7.54e-47	157	product inactivate	lomaiviticin A/lomaiviticin C/lomaiviticin D/lomaiviticin E
CP000667.1.region006	CP0006670021	BGC0000240|glyoxalase/bleomycin_resistance_protein/dioxygenase|AHZ61880.1	2.72e-176	479	product inactivate	lomaiviticin A/lomaiviticin C/lomaiviticin D/lomaiviticin E
CP021707.1.region020	CP0217070045	BGC0000241|Glyoxalase/bleomycin_resistance_protein/dioxygenase|ABP54662.1	4.46e-31	108	product inactivate	lomaiviticin A/lomaiviticin C/lomaiviticin D/lomaiviticin E
CP012621.1.region002	CP0126210017	BGC0000283|putative_glyoxalase/bleomycin_resistance_protein|ABL74382.1	2.68e-54	165	product inactivate
CP015090.1.region001	CP0150900015	BGC0000283|putative_glyoxalase/bleomycin_resistance_protein|ABL74382.1	9.02e-50	152	product inactivate
CP036534.1.region006	CP0365340005	BGC0000283|putative_glyoxalase/bleomycin_resistance_protein|ABL74382.1	5.24e-34	117	product inactivate
CP043317.1.region032	CP0433170015	BGC0000283|putative_glyoxalase/bleomycin_resistance_protein|ABL74382.1	2.92e-34	118	product inactivate
CP028158.1.region008	CP0281580054	BGC0000807|Glyoxalase/bleomycin_resistance_protein/dioxygenase|ADD45282.1	6.85e-67	193	product inactivate	phosphonoglycans
CP028159.1.region006	CP0281590054	BGC0000807|Glyoxalase/bleomycin_resistance_protein/dioxygenase|ADD45282.1	6.85e-67	193	product inactivate	phosphonoglycans
CP027188.1.region001	CP0271880012	BGC0000807|Glyoxalase/bleomycin_resistance_protein/dioxygenase|ADD45282.1	9.2e-58	170	product inactivate	phosphonoglycans
CP036341.1.region006	CP0363410037	BGC0000807|Glyoxalase/bleomycin_resistance_protein/dioxygenase|ADD45282.1	7.58e-56	165	product inactivate	phosphonoglycans
CP043931.1.region004	CP0439310007	BGC0000807|Glyoxalase/bleomycin_resistance_protein/dioxygenase|ADD45282.1	1.15e-55	164	product inactivate	phosphonoglycans
CP002663.1.region007	CP0026630030	BGC0000807|Glyoxalase/bleomycin_resistance_protein/dioxygenase|ADD45282.1	6.73e-55	162	product inactivate	phosphonoglycans
CP030885.1.region001	CP0308850007	BGC0000807|Glyoxalase/bleomycin_resistance_protein/dioxygenase|ADD45282.1	9.98e-49	147	product inactivate	phosphonoglycans
CP030886.1.region002	CP0308860039	BGC0000807|Glyoxalase/bleomycin_resistance_protein/dioxygenase|ADD45282.1	1.43e-52	157	product inactivate	phosphonoglycans
CP014782.1.region001	CP0147820034	BGC0000807|Glyoxalase/bleomycin_resistance_protein/dioxygenase|ADD45282.1	3.22e-32	113	product inactivate	phosphonoglycans
CP016076.1.region009	CP0160760043	BGC0001377|glyoxalase/bleomycin_resistance_protein/dioxygenase|AMK92564.1	1.08e-51	153	product inactivate
CP016077.1.region009	CP0160770044	BGC0001377|glyoxalase/bleomycin_resistance_protein/dioxygenase|AMK92564.1	1.08e-51	153	product inactivate
CP054932.1.region022	CP0549320013	BGC0001377|glyoxalase/bleomycin_resistance_protein/dioxygenase|AMK92564.1	1.19e-43	132	product inactivate
CP025407.1.region013	CP0254070036	BGC0001377|glyoxalase/bleomycin_resistance_protein/dioxygenase|AMK92564.1	5.65e-37	115	product inactivate
CP011492.1.region017	CP0114920009	BGC0001377|glyoxalase/bleomycin_resistance_protein/dioxygenase|AMK92564.1	2.01e-36	114	product inactivate
CP015163.1.region017	CP0151630035	BGC0001377|glyoxalase/bleomycin_resistance_protein/dioxygenase|AMK92566.1	5.05e-51	153	product inactivate
CP002638.1.region014	CP0026380061	BGC0001377|glyoxalase/bleomycin_resistance_protein/dioxygenase|AMK92566.1	7.26e-32	104	product inactivate
CP054932.1.region021	CP0549320021	BGC0001378|glyoxalase/bleomycin_resisance_protein/dioxygenase|AME18022.1	1.49e-36	115	product inactivate
CP003053.1.region009	CP0030530005	BGC0001378|glyoxalase/bleomycin_resisance_protein/dioxygenase|AME18022.1	2.75e-35	112	product inactivate
CP061725.1.region019	CP0617250071	BGC0001378|glyoxalase/bleomycin_resisance_protein/dioxygenase|AME18022.1	1.68e-31	103	product inactivate
CP029241.1.region007	CP0292410003	BGC0001381|Glyoxalase/antibiotic_resistance_protein/dioxygenase|AJO72704.1	7.97e-32	115	product inactivate
CP064783.1.region001	CP0647830021	BGC0001447|Glyoxalase/bleomycin_resistance_protein/dioxygenase|EHK80150.1	1.75e-68	196	product inactivate
CM002273.1.region002	CM0022730018	BGC0001447|Glyoxalase/bleomycin_resistance_protein/dioxygenase|EHK80150.1	2.89e-67	193	product inactivate
CP054920.1.region001	CP0549200006	BGC0001447|Glyoxalase/bleomycin_resistance_protein/dioxygenase|EHK80150.1	3.49e-66	190	product inactivate
CP036534.1.region033	CP0365340031	BGC0001447|Glyoxalase/bleomycin_resistance_protein/dioxygenase|EHK80150.1	4.27e-66	190	product inactivate
CP043317.1.region002	CP0433170005	BGC0001447|Glyoxalase/bleomycin_resistance_protein/dioxygenase|EHK80150.1	5.94e-66	189	product inactivate
CP054923.1.region011	CP0549230014	BGC0001447|Glyoxalase/bleomycin_resistance_protein/dioxygenase|EHK80150.1	5.37e-63	182	product inactivate
CP017014.1.region010	CP0170140012	BGC0001447|Glyoxalase/bleomycin_resistance_protein/dioxygenase|EHK80150.1	5.22e-66	190	product inactivate
CP054939.1.region022	CP0549390008	BGC0001447|Glyoxalase/bleomycin_resistance_protein/dioxygenase|EHK80150.1	6.31e-64	184	product inactivate
CP054938.1.region012	CP0549380034	BGC0001447|Glyoxalase/bleomycin_resistance_protein/dioxygenase|EHK80150.1	1.19e-63	184	product inactivate
CP049344.1.region002	CP0493440022	BGC0001447|Glyoxalase/bleomycin_resistance_protein/dioxygenase|EHK80150.1	9.08e-59	171	product inactivate
CP065429.1.region002	CP0654290022	BGC0001447|Glyoxalase/bleomycin_resistance_protein/dioxygenase|EHK80150.1	2.28e-58	171	product inactivate
CP042912.1.region004	CP0429120016	BGC0001447|Glyoxalase/bleomycin_resistance_protein/dioxygenase|EHK80150.1	3.28e-52	155	product inactivate
HE796683.1.region008	HE7966830038	BGC0001447|Glyoxalase/bleomycin_resistance_protein/dioxygenase|EHK80150.1	3.02e-47	142	product inactivate
LR134263.1.region006	LR1342630027	BGC0001447|Glyoxalase/bleomycin_resistance_protein/dioxygenase|EHK80150.1	1.17e-48	145	product inactivate
CP054916.1.region012	CP0549160005	BGC0001611|glyoxalase/bleomycin_resistance_protein|ATY69562.1	2.97e-38	119	product inactivate
CM002273.1.region002	CM0022730016	BGC0001611|glyoxalase/bleomycin_resistance_protein|ATY69562.1	5.6e-35	110	product inactivate
CP064783.1.region001	CP0647830019	BGC0001611|glyoxalase/bleomycin_resistance_protein|ATY69562.1	2.82e-35	111	product inactivate
CP033581.1.region009	CP0335810040	BGC0001611|glyoxalase/bleomycin_resistance_protein|ATY69562.1	2.46e-43	132	product inactivate
CP024087.1.region006	CP0240870049	BGC0001611|glyoxalase/bleomycin_resistance_protein|ATY69562.1	4.54e-34	108	product inactivate
CP031263.1.region015	CP0312630006	BGC0001611|glyoxalase/bleomycin_resistance_protein|ATY69562.1	4.54e-34	108	product inactivate
AP017900.1.region021	AP0179000029	BGC0001611|glyoxalase/bleomycin_resistance_protein|ATY69562.1	5.17e-31	100	product inactivate
CP017839.1.region021	CP0178390030	BGC0001611|glyoxalase/bleomycin_resistance_protein|ATY69562.1	5.17e-31	100	product inactivate
CP054933.1.region001	CP0549330022	BGC0001783|Glyoxalase/bleomycin_resistance_protein|AFW04576.1	1.33e-38	122	product inactivate	streptonigrin
AP008957.1.region015	AP0089570007	BGC0001783|Glyoxalase/bleomycin_resistance_protein|AFW04576.1	4.94e-36	116	product inactivate	streptonigrin
CP023720.1.region005	CP0237200004	BGC0001783|Glyoxalase/bleomycin_resistance_protein|AFW04576.1	4.94e-36	116	product inactivate	streptonigrin
CP032618.1.region005	CP0326180039	BGC0001783|Glyoxalase/bleomycin_resistance_protein|AFW04576.1	5.79e-37	118	product inactivate	streptonigrin
AP018165.1.region004	AP0181650007	BGC0001783|Glyoxalase/bleomycin_resistance_protein|AFW04576.1	2.24e-36	117	product inactivate	streptonigrin
CP007220.1.region005	CP0072200007	BGC0001783|Glyoxalase/bleomycin_resistance_protein|AFW04576.1	1.84e-36	117	product inactivate	streptonigrin
CP012749.1.region018	CP0127490007	BGC0001783|Glyoxalase/bleomycin_resistance_protein|AFW04576.1	2.88e-36	116	product inactivate	streptonigrin
CP017839.1.region009	CP0178390012	BGC0001783|Glyoxalase/bleomycin_resistance_protein|AFW04576.1	1.01e-33	110	product inactivate	streptonigrin
AP017900.1.region010	AP0179000011	BGC0001783|Glyoxalase/bleomycin_resistance_protein|AFW04576.1	5.14e-33	108	product inactivate	streptonigrin
CP058561.1.region001	CP0585610072	BGC0000172|teicoplanin_resistance_protein_VanZ|ERM18785.1	6.21e-96	285	target alteraion	basiliskamide B
HF571520.1.region001	HF5715200002	BGC0000832|clorobiocin-resistant_gyrase_B|AAN65247.1	0	597	target alteration	clorobiocin
CP030925.1.region012	CP0309250011	BGC0000832|clorobiocin-resistant_gyrase_B|AAN65247.1	0	594	target alteration	clorobiocin
CP005941.1.region003	CP0059410018	BGC0000832|clorobiocin-resistant_gyrase_B|AAN65247.1	0	568	target alteration	clorobiocin
CP010783.1.region003	CP0107830017	BGC0000832|clorobiocin-resistant_gyrase_B|AAN65247.1	0	568	target alteration	clorobiocin
CP022392.1.region003	CP0223920017	BGC0000832|clorobiocin-resistant_gyrase_B|AAN65247.1	0	568	target alteration	clorobiocin
CP035033.1.region001	CP0350330011	BGC0000832|clorobiocin-resistant_gyrase_B|AAN65247.1	0	537	target alteration	clorobiocin
LT838813.1.region006	LT8388130012	BGC0000832|clorobiocin-resistant_gyrase_B|AAN65247.1	2.33e-178	512	target alteration	clorobiocin
CP014470.1.region001	CP0144700034	BGC0000832|clorobiocin-resistant_gyrase_B|AAN65247.1	0	532	target alteration	clorobiocin
CP004404.1.region001	CP0044040004	BGC0000832|clorobiocin-resistant_gyrase_B|AAN65247.1	4.47e-175	509	target alteration	clorobiocin
CP020772.1.region004	CP0207720023	BGC0000832|clorobiocin-resistant_gyrase_B|AAN65247.1	5.77e-169	488	target alteration	clorobiocin
CP001807.1.region002	CP0018070013	BGC0000832|clorobiocin-resistant_gyrase_B|AAN65247.1	8.53e-160	465	target alteration	clorobiocin
CP030158.1.region004	CP0301580001	BGC0000832|clorobiocin-resistant_gyrase_B|AAN65247.1	7.03e-163	473	target alteration	clorobiocin
CP003029.1.region002	CP0030290013	BGC0000832|clorobiocin-resistant_gyrase_B|AAN65247.1	2.49e-159	464	target alteration	clorobiocin
AP012338.1.region003	AP0123380004	BGC0000832|clorobiocin-resistant_gyrase_B|AAN65247.1	2.09e-144	425	target alteration	clorobiocin
CP000159.1.region003	CP0001590014	BGC0000832|clorobiocin-resistant_gyrase_B|AAN65247.1	2.27e-140	415	target alteration	clorobiocin
CP030356.1.region005	CP0303560014	BGC0000832|clorobiocin-resistant_gyrase_B|AAN65247.1	6.94e-141	416	target alteration	clorobiocin
CP030357.1.region004	CP0303570014	BGC0000832|clorobiocin-resistant_gyrase_B|AAN65247.1	3.85e-140	414	target alteration	clorobiocin
CP030361.1.region003	CP0303610014	BGC0000832|clorobiocin-resistant_gyrase_B|AAN65247.1	2.79e-140	414	target alteration	clorobiocin
CP030364.1.region004	CP0303640014	BGC0000832|clorobiocin-resistant_gyrase_B|AAN65247.1	3.85e-140	414	target alteration	clorobiocin
CP030369.1.region005	CP0303690014	BGC0000832|clorobiocin-resistant_gyrase_B|AAN65247.1	2.32e-140	415	target alteration	clorobiocin
CP030716.1.region003	CP0307160014	BGC0000832|clorobiocin-resistant_gyrase_B|AAN65247.1	2.04e-140	415	target alteration	clorobiocin
FP565814.1.region005	FP5658140014	BGC0000832|clorobiocin-resistant_gyrase_B|AAN65247.1	7.76e-140	413	target alteration	clorobiocin
CP015163.1.region025	CP0151630089	BGC0000832|clorobiocin-resistant_gyrase_B|AAN65247.1	8.12e-129	386	target alteration	clorobiocin
CP025408.1.region007	CP0254080024	BGC0000832|clorobiocin-resistant_gyrase_B|AAN65247.1	3e-121	366	target alteration	clorobiocin
CP001087.1.region004	CP0010870001	BGC0000832|clorobiocin-resistant_gyrase_B|AAN65247.1	1.18e-112	343	target alteration	clorobiocin
CP016796.1.region005	CP0167960056	BGC0000832|clorobiocin-resistant_gyrase_B|AAN65247.1	1.23e-118	358	target alteration	clorobiocin
CP043552.1.region001	CP0435520023	BGC0000832|clorobiocin-resistant_gyrase_B|AAN65247.1	2.62e-118	357	target alteration	clorobiocin
CP043550.1.region002	CP0435500057	BGC0000832|clorobiocin-resistant_gyrase_B|AAN65247.1	2.46e-117	355	target alteration	clorobiocin
CM001837.1.region004	CM0018370025	BGC0000832|clorobiocin-resistant_gyrase_B|AAN65247.1	1.75e-72	237	target alteration	clorobiocin
CP009301.1.region001	CP0093010005	BGC0000832|clorobiocin-resistant_gyrase_B|AAN65247.1	1.58e-72	237	target alteration	clorobiocin
CP015125.1.region004	CP0151250027	BGC0000832|clorobiocin-resistant_gyrase_B|AAN65247.1	3.06e-72	236	target alteration	clorobiocin
CP002528.1.region004	CP0025280025	BGC0000832|clorobiocin-resistant_gyrase_B|AAN65247.1	3.03e-69	229	target alteration	clorobiocin
CP029151.1.region003	CP0291510006	BGC0000832|clorobiocin-resistant_gyrase_B|AAN65247.1	2.05e-69	229	target alteration	clorobiocin
CP015163.1.region011	CP0151630032	BGC0000252|tetranactin_resistance_protein|AAD37454.1	5.74e-54	169	target protection	nonactin
CP054938.1.region004	CP0549380018	BGC0001140|Resistance_gene|ACS13710.1	6.21e-158	446	target replacement	platensimycin/platencin
CP038147.1.region023	CP0381470029	BGC0001140|Resistance_gene|ACS13710.1	7.11e-117	341	target replacement	platensimycin/platencin
CP048882.1.region020	CP0488820015	BGC0001140|Resistance_gene|ACS13710.1	1.15e-118	345	target replacement	platensimycin/platencin
CP033434.1.region001	CP0334340034	BGC0001140|Resistance_gene|ACS13710.1	1.01e-39	132	target replacement	platensimycin/platencin
CP003053.1.region009	CP0030530035	BGC0001140|Resistance_gene|ACS13710.1	3.01e-113	331	target replacement	platensimycin/platencin
CP029241.1.region029	CP0292410051	BGC0001140|Resistance_gene|ACS13710.1	4.78e-92	276	target replacement	platensimycin/platencin
CP003053.1.region009	CP0030530036	BGC0001140|Resistance_gene|ACS13710.1	1.61e-101	301	target replacement	platensimycin/platencin
CP054920.1.region012	CP0549200023	BGC0001140|Resistance_gene|ACS13710.1	2.98e-85	259	target replacement	platensimycin/platencin
CP020570.1.region006	CP0205700006	BGC0001140|Resistance_gene|ACS13710.1	7.11e-82	251	target replacement	platensimycin/platencin
CP021707.1.region005	CP0217070009	BGC0001140|Resistance_gene|ACS13710.1	2.29e-83	254	target replacement	platensimycin/platencin
CP029241.1.region029	CP0292410053	BGC0001140|Resistance_gene|ACS13710.1	9.85e-89	269	target replacement	platensimycin/platencin
CP003236.1.region006	CP0032360001	BGC0001140|Resistance_gene|ACS13710.1	1e-85	261	target replacement	platensimycin/platencin
CP054916.1.region040	CP0549160047	BGC0001140|Resistance_gene|ACS13710.1	1.19e-81	249	target replacement	platensimycin/platencin
CP044407.1.region011	CP0444070064	BGC0001140|Resistance_gene|ACS13710.1	2.09e-78	242	target replacement	platensimycin/platencin
CP014796.1.region004	CP0147960003	BGC0001140|Resistance_gene|ACS13710.1	1.41e-80	247	target replacement	platensimycin/platencin
CP017599.1.region025	CP0175990001	BGC0001140|Resistance_gene|ACS13710.1	1.85e-95	286	target replacement	platensimycin/platencin
CP006912.1.region001	CP0069120031	BGC0001140|Resistance_gene|ACS13710.1	1.9e-79	245	target replacement	platensimycin/platencin
CP036264.1.region005	CP0362640013	BGC0001140|Resistance_gene|ACS13710.1	1.02e-83	255	target replacement	platensimycin/platencin
CP026525.1.region002	CP0265250001	BGC0001140|Resistance_gene|ACS13710.1	1.38e-77	239	target replacement	platensimycin/platencin
CP024052.1.region003	CP0240520043	BGC0001140|Resistance_gene|ACS13710.1	9.16e-77	238	target replacement	platensimycin/platencin
CP043056.1.region005	CP0430560002	BGC0001140|Resistance_gene|ACS13710.1	6.58e-94	281	target replacement	platensimycin/platencin
CP003236.1.region002	CP0032360020	BGC0001140|Resistance_gene|ACS13710.1	6.29e-43	149	target replacement	platensimycin/platencin
CP009781.1.region005	CP0097810018	BGC0001140|Resistance_gene|ACS13710.1	6.47e-49	164	target replacement	platensimycin/platencin
AP024154.1.region003	AP0241540032	BGC0001140|Resistance_gene|ACS13710.1	3.18e-86	262	target replacement	platensimycin/platencin
CP042914.1.region008	CP0429140021	BGC0001140|Resistance_gene|ACS13710.1	4.52e-87	264	target replacement	platensimycin/platencin
CP046104.1.region010	CP0461040043	BGC0001140|Resistance_gene|ACS13710.1	8.45e-74	229	target replacement	platensimycin/platencin
CP031263.1.region013	CP0312630025	BGC0001140|Resistance_gene|ACS13710.1	5.36e-77	238	target replacement	platensimycin/platencin
CP006912.1.region002	CP0069120002	BGC0001140|Resistance_gene|ACS13710.1	1.41e-46	159	target replacement	platensimycin/platencin
CP047026.1.region002	CP0470260036	BGC0001140|Resistance_gene|ACS13710.1	1.92e-82	252	target replacement	platensimycin/platencin
CR954247.1.region001	CR9542470030	BGC0001140|Resistance_gene|ACS13710.1	9.19e-49	164	target replacement	platensimycin/platencin
CP021707.1.region005	CP0217070006	BGC0001140|Resistance_gene|ACS13710.1	9.64e-73	227	target replacement	platensimycin/platencin
CP045121.1.region005	CP0451210022	BGC0001140|Resistance_gene|ACS13710.1	5.63e-65	205	target replacement	platensimycin/platencin
CP046104.1.region017	CP0461040035	BGC0001140|Resistance_gene|ACS13710.1	5.02e-71	223	target replacement	platensimycin/platencin
CP028914.1.region002	CP0289140021	BGC0001140|Resistance_gene|ACS13710.1	1.86e-45	154	target replacement	platensimycin/platencin
CP041365.1.region001	CP0413650022	BGC0001140|Resistance_gene|ACS13710.1	2.17e-45	155	target replacement	platensimycin/platencin
CP003746.2.region002	CP0037460023	BGC0001140|Resistance_gene|ACS13710.1	1.32e-34	125	target replacement	platensimycin/platencin
CP015163.1.region012	CP0151630049	BGC0001140|Resistance_gene|ACS13710.1	7.75e-70	219	target replacement	platensimycin/platencin
CP024087.1.region007	CP0240870043	BGC0001140|Resistance_gene|ACS13710.1	1.48e-71	224	target replacement	platensimycin/platencin
CP031263.1.region012	CP0312630023	BGC0001140|Resistance_gene|ACS13710.1	2.27e-71	224	target replacement	platensimycin/platencin
CP003346.1.region004	CP0033460032	BGC0001140|Resistance_gene|ACS13710.1	5.87e-82	251	target replacement	platensimycin/platencin
CP040106.1.region004	CP0401060029	BGC0001140|Resistance_gene|ACS13710.1	9.29e-84	255	target replacement	platensimycin/platencin
CP031963.1.region008	CP0319630026	BGC0001140|Resistance_gene|ACS13710.1	5.79e-40	140	target replacement	platensimycin/platencin
CP023664.1.region002	CP0236640010	BGC0001140|Resistance_gene|ACS13710.1	2.25e-78	241	target replacement	platensimycin/platencin
CP000667.1.region010	CP0006670026	BGC0001140|Resistance_gene|ACS13710.1	2.75e-69	218	target replacement	platensimycin/platencin
CP017476.1.region003	CP0174760021	BGC0001140|Resistance_gene|ACS13710.1	3.24e-35	127	target replacement	platensimycin/platencin
CP042994.1.region007	CP0429940048	BGC0001140|Resistance_gene|ACS13710.1	2.63e-43	149	target replacement	platensimycin/platencin
CP003230.1.region003	CP0032300032	BGC0001140|Resistance_gene|ACS13710.1	8.86e-78	240	target replacement	platensimycin/platencin
CP005996.1.region002	CP0059960010	BGC0001140|Resistance_gene|ACS13710.1	8.86e-78	240	target replacement	platensimycin/platencin
CP043317.1.region018	CP0433170038	BGC0001140|Resistance_gene|ACS13710.1	1.54e-69	219	target replacement	platensimycin/platencin
CP029188.1.region003	CP0291880026	BGC0001140|Resistance_gene|ACS13710.1	7.5e-61	196	target replacement	platensimycin/platencin
CP031115.1.region005	CP0311150019	BGC0001140|Resistance_gene|ACS13710.1	4.43e-72	225	target replacement	platensimycin/platencin
CP029241.1.region029	CP0292410033	BGC0001140|Resistance_gene|ACS13710.1	3.04e-66	211	target replacement	platensimycin/platencin
CP041244.1.region021	CP0412440022	BGC0001140|Resistance_gene|ACS13710.1	1.01e-34	126	target replacement	platensimycin/platencin
CP016076.1.region004	CP0160760019	BGC0001140|Resistance_gene|ACS13710.1	1.06e-33	123	target replacement	platensimycin/platencin
CP016077.1.region004	CP0160770019	BGC0001140|Resistance_gene|ACS13710.1	1.06e-33	123	target replacement	platensimycin/platencin
CP012154.1.region006	CP0121540023	BGC0001140|Resistance_gene|ACS13710.1	9.01e-37	131	target replacement	platensimycin/platencin
CP000667.1.region006	CP0006670033	BGC0001140|Resistance_gene|ACS13710.1	6.56e-68	214	target replacement	platensimycin/platencin
CP054923.1.region009	CP0549230027	BGC0001140|Resistance_gene|ACS13710.1	5.29e-69	218	target replacement	platensimycin/platencin
CP020570.1.region006	CP0205700003	BGC0001140|Resistance_gene|ACS13710.1	1.68e-69	218	target replacement	platensimycin/platencin
CP002284.1.region002	CP0022840021	BGC0001140|Resistance_gene|ACS13710.1	4.4e-35	126	target replacement	platensimycin/platencin
CP006699.1.region002	CP0066990020	BGC0001140|Resistance_gene|ACS13710.1	5.75e-35	127	target replacement	platensimycin/platencin
CP010030.1.region002	CP0100300020	BGC0001140|Resistance_gene|ACS13710.1	5.75e-35	127	target replacement	platensimycin/platencin
CP010032.1.region002	CP0100320020	BGC0001140|Resistance_gene|ACS13710.1	5.75e-35	127	target replacement	platensimycin/platencin
CP010034.1.region002	CP0100340020	BGC0001140|Resistance_gene|ACS13710.1	5.75e-35	127	target replacement	platensimycin/platencin
CP010036.1.region002	CP0100360020	BGC0001140|Resistance_gene|ACS13710.1	5.75e-35	127	target replacement	platensimycin/platencin
CP010038.1.region002	CP0100380020	BGC0001140|Resistance_gene|ACS13710.1	5.75e-35	127	target replacement	platensimycin/platencin
CP010040.1.region002	CP0100400020	BGC0001140|Resistance_gene|ACS13710.1	5.75e-35	127	target replacement	platensimycin/platencin
CP010042.1.region002	CP0100420020	BGC0001140|Resistance_gene|ACS13710.1	5.75e-35	127	target replacement	platensimycin/platencin
CP010044.1.region002	CP0100440020	BGC0001140|Resistance_gene|ACS13710.1	5.75e-35	127	target replacement	platensimycin/platencin
CP010046.1.region002	CP0100460020	BGC0001140|Resistance_gene|ACS13710.1	5.75e-35	127	target replacement	platensimycin/platencin
CP010076.1.region002	CP0100760020	BGC0001140|Resistance_gene|ACS13710.1	5.75e-35	127	target replacement	platensimycin/platencin
CP010078.1.region002	CP0100780020	BGC0001140|Resistance_gene|ACS13710.1	5.75e-35	127	target replacement	platensimycin/platencin
CP010082.1.region002	CP0100820020	BGC0001140|Resistance_gene|ACS13710.1	5.75e-35	127	target replacement	platensimycin/platencin
CP010084.1.region002	CP0100840021	BGC0001140|Resistance_gene|ACS13710.1	6.04e-35	127	target replacement	platensimycin/platencin
CP010291.1.region002	CP0102910020	BGC0001140|Resistance_gene|ACS13710.1	5.75e-35	127	target replacement	platensimycin/platencin
CP011458.1.region002	CP0114580021	BGC0001140|Resistance_gene|ACS13710.1	5.41e-35	127	target replacement	platensimycin/platencin
CP011460.1.region003	CP0114600018	BGC0001140|Resistance_gene|ACS13710.1	4.61e-35	127	target replacement	platensimycin/platencin
CP011462.1.region002	CP0114620013	BGC0001140|Resistance_gene|ACS13710.1	5.41e-35	127	target replacement	platensimycin/platencin
CP011464.1.region002	CP0114640020	BGC0001140|Resistance_gene|ACS13710.1	6.42e-35	126	target replacement	platensimycin/platencin
CP011466.1.region002	CP0114660022	BGC0001140|Resistance_gene|ACS13710.1	4.61e-35	127	target replacement	platensimycin/platencin
CP011470.1.region002	CP0114700020	BGC0001140|Resistance_gene|ACS13710.1	5.75e-35	127	target replacement	platensimycin/platencin
CP011472.1.region003	CP0114720023	BGC0001140|Resistance_gene|ACS13710.1	2.85e-35	127	target replacement	platensimycin/platencin
CP011475.1.region002	CP0114750020	BGC0001140|Resistance_gene|ACS13710.1	5.75e-35	127	target replacement	platensimycin/platencin
CP016095.1.region003	CP0160950019	BGC0001140|Resistance_gene|ACS13710.1	4.4e-35	126	target replacement	platensimycin/platencin
CP020534.1.region002	CP0205340020	BGC0001140|Resistance_gene|ACS13710.1	5.75e-35	127	target replacement	platensimycin/platencin
CP022099.1.region003	CP0220990018	BGC0001140|Resistance_gene|ACS13710.1	2.85e-35	127	target replacement	platensimycin/platencin
CP022101.1.region003	CP0221010018	BGC0001140|Resistance_gene|ACS13710.1	4.61e-35	127	target replacement	platensimycin/platencin
CP022103.1.region003	CP0221030018	BGC0001140|Resistance_gene|ACS13710.1	6.68e-35	126	target replacement	platensimycin/platencin
CP023054.1.region002	CP0230540018	BGC0001140|Resistance_gene|ACS13710.1	5.41e-35	127	target replacement	platensimycin/platencin
CP023208.1.region002	CP0232080020	BGC0001140|Resistance_gene|ACS13710.1	5.75e-35	127	target replacement	platensimycin/platencin
CP023289.1.region002	CP0232890022	BGC0001140|Resistance_gene|ACS13710.1	4.61e-35	127	target replacement	platensimycin/platencin
CP023291.1.region002	CP0232910022	BGC0001140|Resistance_gene|ACS13710.1	4.61e-35	127	target replacement	platensimycin/platencin
CP023293.1.region002	CP0232930022	BGC0001140|Resistance_gene|ACS13710.1	4.61e-35	127	target replacement	platensimycin/platencin
CP023433.1.region002	CP0234330022	BGC0001140|Resistance_gene|ACS13710.1	4.61e-35	127	target replacement	platensimycin/platencin
LK021130.1.region003	LK0211300018	BGC0001140|Resistance_gene|ACS13710.1	2.96e-35	126	target replacement	platensimycin/platencin
CP025990.1.region006	CP0259900030	BGC0001140|Resistance_gene|ACS13710.1	6.98e-68	215	target replacement	platensimycin/platencin
CP050454.1.region005	CP0504540025	BGC0001140|Resistance_gene|ACS13710.1	1.42e-33	122	target replacement	platensimycin/platencin
CP029254.1.region009	CP0292540023	BGC0001140|Resistance_gene|ACS13710.1	8.76e-62	199	target replacement	platensimycin/platencin
CP045119.1.region004	CP0451190021	BGC0001140|Resistance_gene|ACS13710.1	6.32e-74	230	target replacement	platensimycin/platencin
CP038147.1.region007	CP0381470033	BGC0001140|Resistance_gene|ACS13710.1	1.07e-61	198	target replacement	platensimycin/platencin
CP009261.1.region002	CP0092610024	BGC0001140|Resistance_gene|ACS13710.1	3.33e-31	116	target replacement	platensimycin/platencin
CP015512.1.region003	CP0155120024	BGC0001140|Resistance_gene|ACS13710.1	7.14e-31	115	target replacement	platensimycin/platencin
CP016321.1.region003	CP0163210033	BGC0001140|Resistance_gene|ACS13710.1	4.76e-31	115	target replacement	platensimycin/platencin
CP054916.1.region012	CP0549160033	BGC0001140|Resistance_gene|ACS13710.1	2.81e-62	200	target replacement	platensimycin/platencin
CP046415.1.region005	CP0464150031	BGC0001140|Resistance_gene|ACS13710.1	1.45e-57	187	target replacement	platensimycin/platencin
CP001614.2.region007	CP0016140041	BGC0001140|Resistance_gene|ACS13710.1	3.9e-35	127	target replacement	platensimycin/platencin
CP054938.1.region018	CP0549380029	BGC0001140|Resistance_gene|ACS13710.1	2.24e-68	216	target replacement	platensimycin/platencin
CP060052.1.region004	CP0600520018	BGC0001140|Resistance_gene|ACS13710.1	1.14e-48	163	target replacement	platensimycin/platencin
CP046954.1.region001	CP0469540023	BGC0001140|Resistance_gene|ACS13710.1	4.53e-33	121	target replacement	platensimycin/platencin
CP014636.1.region001	CP0146360019	BGC0001140|Resistance_gene|ACS13710.1	6.73e-31	115	target replacement	platensimycin/platencin
CP043420.1.region006	CP0434200019	BGC0001140|Resistance_gene|ACS13710.1	9.54e-33	120	target replacement	platensimycin/platencin
CP014859.1.region004	CP0148590017	BGC0001140|Resistance_gene|ACS13710.1	1.51e-34	126	target replacement	platensimycin/platencin
LT598496.1.region005	LT5984960035	BGC0001140|Resistance_gene|ACS13710.1	5.84e-63	202	target replacement	platensimycin/platencin
FR856861.1.region001	FR8568610013	BGC0001140|Resistance_gene|ACS13710.1	1.48e-48	163	target replacement	platensimycin/platencin
CP036292.1.region013	CP0362920012	BGC0001140|Resistance_gene|ACS13710.1	1.07e-72	227	target replacement	platensimycin/platencin
CP036318.1.region012	CP0363180011	BGC0001140|Resistance_gene|ACS13710.1	1.07e-72	227	target replacement	platensimycin/platencin
CP034587.1.region033	CP0345870025	BGC0001140|Resistance_gene|ACS13710.1	1.66e-67	214	target replacement	platensimycin/platencin
CP013484.1.region004	CP0134840023	BGC0001140|Resistance_gene|ACS13710.1	2.35e-34	124	target replacement	platensimycin/platencin
CP014040.1.region002	CP0140400025	BGC0001140|Resistance_gene|ACS13710.1	2.43e-34	124	target replacement	platensimycin/platencin
CP016224.1.region002	CP0162240023	BGC0001140|Resistance_gene|ACS13710.1	2.6e-34	124	target replacement	platensimycin/platencin
CP017889.1.region002	CP0178890023	BGC0001140|Resistance_gene|ACS13710.1	2.6e-34	124	target replacement	platensimycin/platencin
CP017896.1.region002	CP0178960023	BGC0001140|Resistance_gene|ACS13710.1	2.6e-34	124	target replacement	platensimycin/platencin
CP017899.1.region002	CP0178990023	BGC0001140|Resistance_gene|ACS13710.1	2.6e-34	124	target replacement	platensimycin/platencin
CP017907.1.region002	CP0179070023	BGC0001140|Resistance_gene|ACS13710.1	2.6e-34	124	target replacement	platensimycin/platencin
CP017911.1.region002	CP0179110023	BGC0001140|Resistance_gene|ACS13710.1	2.6e-34	124	target replacement	platensimycin/platencin
CP017913.1.region002	CP0179130023	BGC0001140|Resistance_gene|ACS13710.1	2.6e-34	124	target replacement	platensimycin/platencin
CP017919.1.region002	CP0179190022	BGC0001140|Resistance_gene|ACS13710.1	2.6e-34	124	target replacement	platensimycin/platencin
WAHT01000008.1.region001	WAHT010000080024	BGC0001140|Resistance_gene|ACS13710.1	2.55e-34	124	target replacement	platensimycin/platencin
CP045338.1.region002	CP0453380018	BGC0001140|Resistance_gene|ACS13710.1	2.04e-49	166	target replacement	platensimycin/platencin
CP017476.1.region003	CP0174760012	BGC0001140|Resistance_gene|ACS13710.1	4.93e-57	186	target replacement	platensimycin/platencin
CP016076.1.region009	CP0160760029	BGC0001140|Resistance_gene|ACS13710.1	9.23e-66	209	target replacement	platensimycin/platencin
CP016077.1.region009	CP0160770030	BGC0001140|Resistance_gene|ACS13710.1	9.23e-66	209	target replacement	platensimycin/platencin
CP029254.1.region011	CP0292540024	BGC0001140|Resistance_gene|ACS13710.1	5.89e-37	132	target replacement	platensimycin/platencin
CP015163.1.region017	CP0151630018	BGC0001140|Resistance_gene|ACS13710.1	1.87e-34	130	target replacement	platensimycin/platencin
CP013611.1.region001	CP0136110034	BGC0001140|Resistance_gene|ACS13710.1	2.13e-58	189	target replacement	platensimycin/platencin
CP033577.1.region001	CP0335770021	BGC0001140|Resistance_gene|ACS13710.1	1.8e-38	136	target replacement	platensimycin/platencin
CP017965.1.region014	CP0179650036	BGC0001140|Resistance_gene|ACS13710.1	1.38e-60	196	target replacement	platensimycin/platencin
CP009292.1.region001	CP0092920017	BGC0001140|Resistance_gene|ACS13710.1	1.73e-49	166	target replacement	platensimycin/platencin
CP011492.1.region011	CP0114920025	BGC0001140|Resistance_gene|ACS13710.1	3.27e-63	202	target replacement	platensimycin/platencin
CP001805.1.region004	CP0018050021	BGC0001140|Resistance_gene|ACS13710.1	1.47e-33	122	target replacement	platensimycin/platencin
CP007004.1.region002	CP0070040022	BGC0001140|Resistance_gene|ACS13710.1	5.46e-34	123	target replacement	platensimycin/platencin
CP010883.1.region002	CP0108830023	BGC0001140|Resistance_gene|ACS13710.1	8.84e-34	122	target replacement	platensimycin/platencin
CP013826.1.region003	CP0138260021	BGC0001140|Resistance_gene|ACS13710.1	5.03e-34	123	target replacement	platensimycin/platencin
CP014053.1.region004	CP0140530025	BGC0001140|Resistance_gene|ACS13710.1	1.25e-34	125	target replacement	platensimycin/platencin
CP020034.1.region003	CP0200340021	BGC0001140|Resistance_gene|ACS13710.1	1.28e-33	122	target replacement	platensimycin/platencin
CP032213.1.region002	CP0322130024	BGC0001140|Resistance_gene|ACS13710.1	1.25e-34	125	target replacement	platensimycin/platencin
CP033141.1.region003	CP0331410021	BGC0001140|Resistance_gene|ACS13710.1	5.99e-34	124	target replacement	platensimycin/platencin
CP034565.1.region002	CP0345650025	BGC0001140|Resistance_gene|ACS13710.1	3.21e-34	124	target replacement	platensimycin/platencin
CP065369.1.region002	CP0653690021	BGC0001140|Resistance_gene|ACS13710.1	1.95e-34	125	target replacement	platensimycin/platencin
CP031969.1.region015	CP0319690050	BGC0001140|Resistance_gene|ACS13710.1	7.46e-56	183	target replacement	platensimycin/platencin
CP033581.1.region026	CP0335810045	BGC0001140|Resistance_gene|ACS13710.1	1.56e-59	193	target replacement	platensimycin/platencin
CP018680.2.region001	CP0186800023	BGC0001140|Resistance_gene|ACS13710.1	5.15e-33	121	target replacement	platensimycin/platencin
CP033137.1.region003	CP0331370025	BGC0001140|Resistance_gene|ACS13710.1	3.49e-33	121	target replacement	platensimycin/platencin
CP045070.1.region002	CP0450700039	BGC0001140|Resistance_gene|ACS13710.1	5.63e-33	121	target replacement	platensimycin/platencin
CP056041.1.region010	CP0560410035	BGC0001140|Resistance_gene|ACS13710.1	2.62e-61	197	target replacement	platensimycin/platencin
CP036313.1.region004	CP0363130044	BGC0001140|Resistance_gene|ACS13710.1	1.11e-61	198	target replacement	platensimycin/platencin
CP041244.1.region012	CP0412440035	BGC0001140|Resistance_gene|ACS13710.1	5.28e-64	205	target replacement	platensimycin/platencin
CP056041.1.region032	CP0560410034	BGC0001140|Resistance_gene|ACS13710.1	2.71e-65	208	target replacement	platensimycin/platencin
AP021879.1.region003	AP0218790024	BGC0001140|Resistance_gene|ACS13710.1	4.35e-54	178	target replacement	platensimycin/platencin
CP009355.1.region003	CP0093550018	BGC0001140|Resistance_gene|ACS13710.1	6.55e-34	123	target replacement	platensimycin/platencin
CP009467.2.region003	CP0094670023	BGC0001140|Resistance_gene|ACS13710.1	1.69e-32	119	target replacement	platensimycin/platencin
CP018308.1.region003	CP0183080021	BGC0001140|Resistance_gene|ACS13710.1	3.78e-38	135	target replacement	platensimycin/platencin
CP040751.1.region002	CP0407510039	BGC0001140|Resistance_gene|ACS13710.1	2.08e-39	138	target replacement	platensimycin/platencin
CP000267.1.region005	CP0002670047	BGC0001140|Resistance_gene|ACS13710.1	1.67e-69	219	target replacement	platensimycin/platencin
CP018632.1.region009	CP0186320021	BGC0001140|Resistance_gene|ACS13710.1	1.82e-34	125	target replacement	platensimycin/platencin
CP020570.1.region010	CP0205700040	BGC0001140|Resistance_gene|ACS13710.1	6.86e-59	191	target replacement	platensimycin/platencin
CP024052.1.region003	CP0240520033	BGC0001140|Resistance_gene|ACS13710.1	1.65e-59	192	target replacement	platensimycin/platencin
CP024087.1.region007	CP0240870034	BGC0001140|Resistance_gene|ACS13710.1	1.81e-59	192	target replacement	platensimycin/platencin
CP031263.1.region012	CP0312630034	BGC0001140|Resistance_gene|ACS13710.1	2.32e-59	192	target replacement	platensimycin/platencin
CP038147.1.region001	CP0381470035	BGC0001140|Resistance_gene|ACS13710.1	5.12e-58	189	target replacement	platensimycin/platencin
CP056041.1.region021	CP0560410035	BGC0001140|Resistance_gene|ACS13710.1	1.45e-58	190	target replacement	platensimycin/platencin
CP003972.1.region002	CP0039720022	BGC0001140|Resistance_gene|ACS13710.1	4.93e-33	120	target replacement	platensimycin/platencin
CP031769.1.region004	CP0317690020	BGC0001140|Resistance_gene|ACS13710.1	6.62e-36	129	target replacement	platensimycin/platencin
CP021121.1.region012	CP0211210031	BGC0001140|Resistance_gene|ACS13710.1	8.14e-66	209	target replacement	platensimycin/platencin
CP041244.1.region003	CP0412440046	BGC0001140|Resistance_gene|ACS13710.1	2.36e-58	190	target replacement	platensimycin/platencin
CP031010.1.region005	CP0310100026	BGC0001140|Resistance_gene|ACS13710.1	9.42e-36	128	target replacement	platensimycin/platencin
CP000644.1.region001	CP0006440024	BGC0001140|Resistance_gene|ACS13710.1	4.54e-33	121	target replacement	platensimycin/platencin
CP011035.1.region001	CP0110350025	BGC0001140|Resistance_gene|ACS13710.1	2.52e-32	119	target replacement	platensimycin/platencin
CP022175.1.region003	CP0221750021	BGC0001140|Resistance_gene|ACS13710.1	4.54e-33	121	target replacement	platensimycin/platencin
CP022181.1.region003	CP0221810021	BGC0001140|Resistance_gene|ACS13710.1	4.54e-33	121	target replacement	platensimycin/platencin
CP022186.1.region003	CP0221860021	BGC0001140|Resistance_gene|ACS13710.1	4.54e-33	121	target replacement	platensimycin/platencin
CP036534.1.region018	CP0365340035	BGC0001140|Resistance_gene|ACS13710.1	2.97e-54	179	target replacement	platensimycin/platencin
CP043317.1.region021	CP0433170034	BGC0001140|Resistance_gene|ACS13710.1	2.91e-54	179	target replacement	platensimycin/platencin
CP050454.1.region001	CP0504540024	BGC0001140|Resistance_gene|ACS13710.1	8.68e-40	144	target replacement	platensimycin/platencin
CP041614.1.region007	CP0416140027	BGC0001140|Resistance_gene|ACS13710.1	8.92e-63	201	target replacement	platensimycin/platencin
CP000644.1.region001	CP0006440027	BGC0001140|Resistance_gene|ACS13710.1	2.37e-56	184	target replacement	platensimycin/platencin
CP022175.1.region003	CP0221750018	BGC0001140|Resistance_gene|ACS13710.1	2.37e-56	184	target replacement	platensimycin/platencin
CP022181.1.region003	CP0221810018	BGC0001140|Resistance_gene|ACS13710.1	2.37e-56	184	target replacement	platensimycin/platencin
CP022186.1.region003	CP0221860018	BGC0001140|Resistance_gene|ACS13710.1	2.37e-56	184	target replacement	platensimycin/platencin
CP002638.1.region016	CP0026380032	BGC0001140|Resistance_gene|ACS13710.1	5.86e-59	191	target replacement	platensimycin/platencin
CP028158.1.region008	CP0281580032	BGC0001140|Resistance_gene|ACS13710.1	2.18e-58	190	target replacement	platensimycin/platencin
CP028159.1.region006	CP0281590032	BGC0001140|Resistance_gene|ACS13710.1	2.18e-58	190	target replacement	platensimycin/platencin
CP054923.1.region017	CP0549230037	BGC0001140|Resistance_gene|ACS13710.1	2.66e-61	197	target replacement	platensimycin/platencin
CP018047.1.region004	CP0180470031	BGC0001140|Resistance_gene|ACS13710.1	5.28e-31	120	target replacement	platensimycin/platencin
CP000469.1.region001	CP0004690023	BGC0001140|Resistance_gene|ACS13710.1	4.78e-61	196	target replacement	platensimycin/platencin
CP003985.1.region007	CP0039850019	BGC0001140|Resistance_gene|ACS13710.1	9.71e-35	132	target replacement	platensimycin/platencin
AP012273.1.region002	AP0122730018	BGC0001140|Resistance_gene|ACS13710.1	3.26e-33	121	target replacement	platensimycin/platencin
CP045338.1.region002	CP0453380021	BGC0001140|Resistance_gene|ACS13710.1	2.19e-33	122	target replacement	platensimycin/platencin
CP000267.1.region005	CP0002670045	BGC0001140|Resistance_gene|ACS13710.1	9.29e-52	172	target replacement	platensimycin/platencin
CP054920.1.region015	CP0549200036	BGC0001140|Resistance_gene|ACS13710.1	3.78e-56	184	target replacement	platensimycin/platencin
CP054916.1.region017	CP0549160037	BGC0001140|Resistance_gene|ACS13710.1	5.87e-66	209	target replacement	platensimycin/platencin
CP028141.1.region002	CP0281410021	BGC0001140|Resistance_gene|ACS13710.1	8.07e-33	120	target replacement	platensimycin/platencin
CP028342.1.region002	CP0283420021	BGC0001140|Resistance_gene|ACS13710.1	8.07e-33	120	target replacement	platensimycin/platencin
CP000961.1.region009	CP0009610024	BGC0001140|Resistance_gene|ACS13710.1	2.12e-60	194	target replacement	platensimycin/platencin
CP046954.1.region001	CP0469540026	BGC0001140|Resistance_gene|ACS13710.1	5.51e-55	180	target replacement	platensimycin/platencin
CP000446.1.region001	CP0004460024	BGC0001140|Resistance_gene|ACS13710.1	4.04e-60	194	target replacement	platensimycin/platencin
CP041244.1.region026	CP0412440029	BGC0001140|Resistance_gene|ACS13710.1	3.1e-65	208	target replacement	platensimycin/platencin
CP062941.1.region006	CP0629410021	BGC0001140|Resistance_gene|ACS13710.1	2.34e-31	116	target replacement	platensimycin/platencin
CM002271.1.region021	CM0022710033	BGC0001140|Resistance_gene|ACS13710.1	3.54e-62	199	target replacement	platensimycin/platencin
CM002273.1.region022	CM0022730031	BGC0001140|Resistance_gene|ACS13710.1	3.54e-62	199	target replacement	platensimycin/platencin
CP034015.1.region005	CP0340150023	BGC0001140|Resistance_gene|ACS13710.1	1.56e-62	200	target replacement	platensimycin/platencin
CP034970.1.region002	CP0349700024	BGC0001140|Resistance_gene|ACS13710.1	4.11e-35	127	target replacement	platensimycin/platencin
CP014859.1.region008	CP0148590034	BGC0001140|Resistance_gene|ACS13710.1	3.22e-63	202	target replacement	platensimycin/platencin
CP054939.1.region020	CP0549390054	BGC0001140|Resistance_gene|ACS13710.1	7.93e-58	188	target replacement	platensimycin/platencin
CP021707.1.region015	CP0217070047	BGC0001140|Resistance_gene|ACS13710.1	7.44e-68	214	target replacement	platensimycin/platencin
CP001135.1.region002	CP0011350019	BGC0001140|Resistance_gene|ACS13710.1	5.39e-32	118	target replacement	platensimycin/platencin
CP054916.1.region022	CP0549160024	BGC0001140|Resistance_gene|ACS13710.1	6.7e-39	137	target replacement	platensimycin/platencin
CP028897.1.region006	CP0288970020	BGC0001140|Resistance_gene|ACS13710.1	4.13e-68	214	target replacement	platensimycin/platencin
CP000828.1.region002	CP0008280020	BGC0001140|Resistance_gene|ACS13710.1	6.59e-48	161	target replacement	platensimycin/platencin
CP016353.1.region004	CP0163530042	BGC0001140|Resistance_gene|ACS13710.1	1.34e-58	190	target replacement	platensimycin/platencin
CP061725.1.region017	CP0617250035	BGC0001140|Resistance_gene|ACS13710.1	9.35e-60	193	target replacement	platensimycin/platencin
CP025792.1.region002	CP0257920040	BGC0001140|Resistance_gene|ACS13710.1	2.3e-32	119	target replacement	platensimycin/platencin
CP003549.1.region006	CP0035490016	BGC0001140|Resistance_gene|ACS13710.1	2.29e-62	199	target replacement	platensimycin/platencin
CP032091.1.region001	CP0320910024	BGC0001140|Resistance_gene|ACS13710.1	2.67e-55	181	target replacement	platensimycin/platencin
CP058973.1.region001	CP0589730016	BGC0001140|Resistance_gene|ACS13710.1	2.67e-55	181	target replacement	platensimycin/platencin
CP059832.1.region001	CP0598320024	BGC0001140|Resistance_gene|ACS13710.1	1.79e-55	182	target replacement	platensimycin/platencin
CP025990.1.region004	CP0259900019	BGC0001140|Resistance_gene|ACS13710.1	1.93e-37	138	target replacement	platensimycin/platencin
CP036313.1.region004	CP0363130043	BGC0001140|Resistance_gene|ACS13710.1	4.18e-51	170	target replacement	platensimycin/platencin
LN554846.1.region003	LN5548460003	BGC0001140|Resistance_gene|ACS13710.1	2.31e-58	189	target replacement	platensimycin/platencin
CP002638.1.region009	CP0026380035	BGC0001140|Resistance_gene|ACS13710.1	1.37e-62	201	target replacement	platensimycin/platencin
CP029043.1.region009	CP0290430035	BGC0001140|Resistance_gene|ACS13710.1	1.23e-56	185	target replacement	platensimycin/platencin
CP011492.1.region022	CP0114920027	BGC0001140|Resistance_gene|ACS13710.1	3.11e-63	202	target replacement	platensimycin/platencin
CP047318.1.region012	CP0473180030	BGC0001140|Resistance_gene|ACS13710.1	1.03e-64	206	target replacement	platensimycin/platencin
CP029064.1.region001	CP0290640022	BGC0001140|Resistance_gene|ACS13710.1	9.61e-31	114	target replacement	platensimycin/platencin
CR954247.1.region001	CR9542470027	BGC0001140|Resistance_gene|ACS13710.1	8.89e-33	120	target replacement	platensimycin/platencin
CP040443.1.region001	CP0404430025	BGC0001140|Resistance_gene|ACS13710.1	4.62e-31	115	target replacement	platensimycin/platencin
CP003746.2.region002	CP0037460020	BGC0001140|Resistance_gene|ACS13710.1	4.64e-61	196	target replacement	platensimycin/platencin
CP014782.1.region003	CP0147820025	BGC0001140|Resistance_gene|ACS13710.1	1.07e-61	198	target replacement	platensimycin/platencin
CP020472.1.region001	CP0204720021	BGC0001140|Resistance_gene|ACS13710.1	2.55e-62	199	target replacement	platensimycin/platencin
CP062058.1.region005	CP0620580022	BGC0001140|Resistance_gene|ACS13710.1	7.87e-63	201	target replacement	platensimycin/platencin
CP028901.1.region008	CP0289010016	BGC0001140|Resistance_gene|ACS13710.1	5.29e-61	197	target replacement	platensimycin/platencin
CP000891.1.region001	CP0008910019	BGC0001140|Resistance_gene|ACS13710.1	8.74e-61	196	target replacement	platensimycin/platencin
CP002383.1.region001	CP0023830019	BGC0001140|Resistance_gene|ACS13710.1	8.74e-61	196	target replacement	platensimycin/platencin
CP025407.1.region017	CP0254070040	BGC0001140|Resistance_gene|ACS13710.1	2.54e-60	195	target replacement	platensimycin/platencin
CP046104.1.region010	CP0461040033	BGC0001140|Resistance_gene|ACS13710.1	6.1e-58	188	target replacement	platensimycin/platencin
CP048882.1.region019	CP0488820033	BGC0001140|Resistance_gene|ACS13710.1	7.11e-61	196	target replacement	platensimycin/platencin
CP068437.1.region008	CP0684370023	BGC0001140|Resistance_gene|ACS13710.1	3.99e-58	189	target replacement	platensimycin/platencin
CP006912.1.region003	CP0069120032	BGC0001140|Resistance_gene|ACS13710.1	1.97e-59	192	target replacement	platensimycin/platencin
CP000267.1.region005	CP0002670030	BGC0001140|Resistance_gene|ACS13710.1	1.16e-31	117	target replacement	platensimycin/platencin
CP025407.1.region007	CP0254070046	BGC0001140|Resistance_gene|ACS13710.1	9.18e-64	204	target replacement	platensimycin/platencin
CP039374.2.region001	CP0393740021	BGC0001140|Resistance_gene|ACS13710.1	1.12e-31	117	target replacement	platensimycin/platencin
CP054929.1.region015	CP0549290012	BGC0001140|Resistance_gene|ACS13710.1	2.4e-46	158	target replacement	platensimycin/platencin
CP042301.2.region002	CP0423010021	BGC0001140|Resistance_gene|ACS13710.1	1.85e-53	177	target replacement	platensimycin/platencin
CP029188.1.region023	CP0291880067	BGC0001140|Resistance_gene|ACS13710.1	5.37e-58	189	target replacement	platensimycin/platencin
CP000503.1.region001	CP0005030019	BGC0001140|Resistance_gene|ACS13710.1	4.63e-59	191	target replacement	platensimycin/platencin
CP000753.1.region001	CP0007530021	BGC0001140|Resistance_gene|ACS13710.1	4.79e-60	194	target replacement	platensimycin/platencin
CP024052.1.region002	CP0240520024	BGC0001140|Resistance_gene|ACS13710.1	2.08e-65	208	target replacement	platensimycin/platencin
CP036534.1.region026	CP0365340064	BGC0001140|Resistance_gene|ACS13710.1	3.59e-65	208	target replacement	platensimycin/platencin
CP000472.1.region003	CP0004720021	BGC0001140|Resistance_gene|ACS13710.1	4.45e-60	194	target replacement	platensimycin/platencin
CP000606.1.region004	CP0006060023	BGC0001140|Resistance_gene|ACS13710.1	1.58e-58	190	target replacement	platensimycin/platencin
CP022272.1.region004	CP0222720022	BGC0001140|Resistance_gene|ACS13710.1	1.48e-58	190	target replacement	platensimycin/platencin
CP022103.1.region003	CP0221030021	BGC0001140|Resistance_gene|ACS13710.1	6.67e-54	177	target replacement	platensimycin/platencin
CP065428.1.region004	CP0654280018	BGC0001140|Resistance_gene|ACS13710.1	2.16e-52	174	target replacement	platensimycin/platencin
CP020570.1.region027	CP0205700028	BGC0001140|Resistance_gene|ACS13710.1	1.44e-39	139	target replacement	platensimycin/platencin
CP054929.1.region004	CP0549290032	BGC0001140|Resistance_gene|ACS13710.1	3.39e-43	149	target replacement	platensimycin/platencin
CP029043.1.region007	CP0290430023	BGC0001140|Resistance_gene|ACS13710.1	9.69e-62	199	target replacement	platensimycin/platencin
CP044407.1.region007	CP0444070017	BGC0001140|Resistance_gene|ACS13710.1	1.57e-35	134	target replacement	platensimycin/platencin
CP028897.1.region006	CP0288970023	BGC0001140|Resistance_gene|ACS13710.1	7.91e-31	115	target replacement	platensimycin/platencin
CP001252.1.region001	CP0012520023	BGC0001140|Resistance_gene|ACS13710.1	2.88e-60	194	target replacement	platensimycin/platencin
CP001614.2.region007	CP0016140058	BGC0001140|Resistance_gene|ACS13710.1	1.46e-60	195	target replacement	platensimycin/platencin
CP011460.1.region003	CP0114600021	BGC0001140|Resistance_gene|ACS13710.1	2.9e-53	176	target replacement	platensimycin/platencin
CP022101.1.region003	CP0221010021	BGC0001140|Resistance_gene|ACS13710.1	2.9e-53	176	target replacement	platensimycin/platencin
CP000667.1.region010	CP0006670035	BGC0001140|Resistance_gene|ACS13710.1	1.13e-53	177	target replacement	platensimycin/platencin
CP040751.1.region002	CP0407510022	BGC0001140|Resistance_gene|ACS13710.1	2.35e-46	157	target replacement	platensimycin/platencin
CP028367.1.region006	CP0283670016	BGC0001140|Resistance_gene|ACS13710.1	3.89e-57	186	target replacement	platensimycin/platencin
CP041153.1.region004	CP0411530022	BGC0001140|Resistance_gene|ACS13710.1	3.18e-57	186	target replacement	platensimycin/platencin
CP000142.2.region006	CP0001420036	BGC0001140|Resistance_gene|ACS13710.1	1.53e-41	144	target replacement	platensimycin/platencin
CP011458.1.region002	CP0114580018	BGC0001140|Resistance_gene|ACS13710.1	2.14e-53	176	target replacement	platensimycin/platencin
CP011462.1.region002	CP0114620010	BGC0001140|Resistance_gene|ACS13710.1	2.14e-53	176	target replacement	platensimycin/platencin
CP011466.1.region002	CP0114660019	BGC0001140|Resistance_gene|ACS13710.1	2.5e-53	176	target replacement	platensimycin/platencin
CP011472.1.region003	CP0114720020	BGC0001140|Resistance_gene|ACS13710.1	1.43e-53	177	target replacement	platensimycin/platencin
CP022099.1.region003	CP0220990021	BGC0001140|Resistance_gene|ACS13710.1	1.43e-53	177	target replacement	platensimycin/platencin
CP023054.1.region002	CP0230540021	BGC0001140|Resistance_gene|ACS13710.1	2.14e-53	176	target replacement	platensimycin/platencin
CP023289.1.region002	CP0232890019	BGC0001140|Resistance_gene|ACS13710.1	2.5e-53	176	target replacement	platensimycin/platencin
CP023291.1.region002	CP0232910019	BGC0001140|Resistance_gene|ACS13710.1	2.5e-53	176	target replacement	platensimycin/platencin
CP023293.1.region002	CP0232930019	BGC0001140|Resistance_gene|ACS13710.1	2.5e-53	176	target replacement	platensimycin/platencin
CP023433.1.region002	CP0234330019	BGC0001140|Resistance_gene|ACS13710.1	2.5e-53	176	target replacement	platensimycin/platencin
CP062941.1.region006	CP0629410024	BGC0001140|Resistance_gene|ACS13710.1	6.9e-61	196	target replacement	platensimycin/platencin
CP000142.2.region006	CP0001420034	BGC0001140|Resistance_gene|ACS13710.1	9.21e-46	156	target replacement	platensimycin/platencin
CP031263.1.region015	CP0312630013	BGC0001140|Resistance_gene|ACS13710.1	4.36e-38	135	target replacement	platensimycin/platencin
CP041783.1.region004	CP0417830023	BGC0001140|Resistance_gene|ACS13710.1	4.35e-57	186	target replacement	platensimycin/platencin
CP058561.1.region010	CP0585610015	BGC0001140|Resistance_gene|ACS13710.1	4.04e-35	127	target replacement	platensimycin/platencin
CP011012.1.region002	CP0110120028	BGC0001140|Resistance_gene|ACS13710.1	2.04e-33	122	target replacement	platensimycin/platencin
CP033066.1.region001	CP0330660024	BGC0001140|Resistance_gene|ACS13710.1	2.49e-33	122	target replacement	platensimycin/platencin
CP000507.1.region004	CP0005070021	BGC0001140|Resistance_gene|ACS13710.1	1.86e-54	179	target replacement	platensimycin/platencin
CP012738.1.region002	CP0127380025	BGC0001140|Resistance_gene|ACS13710.1	4.3e-55	181	target replacement	platensimycin/platencin
CP031969.1.region010	CP0319690034	BGC0001140|Resistance_gene|ACS13710.1	4.35e-61	197	target replacement	platensimycin/platencin
CP002078.1.region002	CP0020780021	BGC0001140|Resistance_gene|ACS13710.1	1.17e-51	172	target replacement	platensimycin/platencin
CP003985.1.region001	CP0039850035	BGC0001140|Resistance_gene|ACS13710.1	1.05e-60	196	target replacement	platensimycin/platencin
CP006896.1.region002	CP0068960021	BGC0001140|Resistance_gene|ACS13710.1	1.17e-51	172	target replacement	platensimycin/platencin
CP006898.1.region002	CP0068980020	BGC0001140|Resistance_gene|ACS13710.1	1.17e-51	172	target replacement	platensimycin/platencin
LT605585.1.region003	LT6055850022	BGC0001140|Resistance_gene|ACS13710.1	3.77e-52	173	target replacement	platensimycin/platencin
AP021846.1.region007	AP0218460005	BGC0001140|Resistance_gene|ACS13710.1	3.94e-58	189	target replacement	platensimycin/platencin
CP003221.1.region004	CP0032210024	BGC0001140|Resistance_gene|ACS13710.1	4e-57	186	target replacement	platensimycin/platencin
CP010030.1.region002	CP0100300017	BGC0001140|Resistance_gene|ACS13710.1	6.03e-53	175	target replacement	platensimycin/platencin
CP010040.1.region002	CP0100400017	BGC0001140|Resistance_gene|ACS13710.1	6.03e-53	175	target replacement	platensimycin/platencin
CP010084.1.region002	CP0100840018	BGC0001140|Resistance_gene|ACS13710.1	9.56e-53	174	target replacement	platensimycin/platencin
CP011012.1.region002	CP0110120031	BGC0001140|Resistance_gene|ACS13710.1	1.41e-52	174	target replacement	platensimycin/platencin
CP011464.1.region002	CP0114640017	BGC0001140|Resistance_gene|ACS13710.1	7.92e-53	175	target replacement	platensimycin/platencin
CP012738.1.region002	CP0127380022	BGC0001140|Resistance_gene|ACS13710.1	1.01e-32	120	target replacement	platensimycin/platencin
CP020038.1.region010	CP0200380017	BGC0001140|Resistance_gene|ACS13710.1	3.82e-32	119	target replacement	platensimycin/platencin
CP039700.1.region004	CP0397000023	BGC0001140|Resistance_gene|ACS13710.1	4.65e-32	118	target replacement	platensimycin/platencin
CP011035.1.region001	CP0110350029	BGC0001140|Resistance_gene|ACS13710.1	2.23e-52	173	target replacement	platensimycin/platencin
CP029254.1.region001	CP0292540026	BGC0001140|Resistance_gene|ACS13710.1	3.07e-43	154	target replacement	platensimycin/platencin
CP000563.1.region001	CP0005630021	BGC0001140|Resistance_gene|ACS13710.1	5.85e-59	191	target replacement	platensimycin/platencin
CP002284.1.region002	CP0022840018	BGC0001140|Resistance_gene|ACS13710.1	4.27e-53	175	target replacement	platensimycin/platencin
CP002377.1.region004	CP0023770016	BGC0001140|Resistance_gene|ACS13710.1	2.27e-55	181	target replacement	platensimycin/platencin
CP002767.1.region006	CP0027670023	BGC0001140|Resistance_gene|ACS13710.1	2.94e-59	192	target replacement	platensimycin/platencin
CP002811.1.region001	CP0028110021	BGC0001140|Resistance_gene|ACS13710.1	5.85e-59	191	target replacement	platensimycin/platencin
CP006699.1.region002	CP0066990017	BGC0001140|Resistance_gene|ACS13710.1	4.27e-53	175	target replacement	platensimycin/platencin
CP010032.1.region002	CP0100320017	BGC0001140|Resistance_gene|ACS13710.1	4.27e-53	175	target replacement	platensimycin/platencin
CP010034.1.region002	CP0100340017	BGC0001140|Resistance_gene|ACS13710.1	4.27e-53	175	target replacement	platensimycin/platencin
CP010036.1.region002	CP0100360017	BGC0001140|Resistance_gene|ACS13710.1	4.27e-53	175	target replacement	platensimycin/platencin
CP010038.1.region002	CP0100380017	BGC0001140|Resistance_gene|ACS13710.1	4.27e-53	175	target replacement	platensimycin/platencin
CP010042.1.region002	CP0100420017	BGC0001140|Resistance_gene|ACS13710.1	4.27e-53	175	target replacement	platensimycin/platencin
CP010044.1.region002	CP0100440017	BGC0001140|Resistance_gene|ACS13710.1	4.27e-53	175	target replacement	platensimycin/platencin
CP010046.1.region002	CP0100460017	BGC0001140|Resistance_gene|ACS13710.1	4.27e-53	175	target replacement	platensimycin/platencin
CP010076.1.region002	CP0100760017	BGC0001140|Resistance_gene|ACS13710.1	4.27e-53	175	target replacement	platensimycin/platencin
CP010078.1.region002	CP0100780017	BGC0001140|Resistance_gene|ACS13710.1	4.27e-53	175	target replacement	platensimycin/platencin
CP010082.1.region002	CP0100820017	BGC0001140|Resistance_gene|ACS13710.1	4.27e-53	175	target replacement	platensimycin/platencin
CP010291.1.region002	CP0102910017	BGC0001140|Resistance_gene|ACS13710.1	4.27e-53	175	target replacement	platensimycin/platencin
CP011470.1.region002	CP0114700017	BGC0001140|Resistance_gene|ACS13710.1	4.27e-53	175	target replacement	platensimycin/platencin
CP011475.1.region002	CP0114750017	BGC0001140|Resistance_gene|ACS13710.1	4.27e-53	175	target replacement	platensimycin/platencin
CP016095.1.region003	CP0160950022	BGC0001140|Resistance_gene|ACS13710.1	4.27e-53	175	target replacement	platensimycin/platencin
CP019650.1.region007	CP0196500010	BGC0001140|Resistance_gene|ACS13710.1	5.93e-52	172	target replacement	platensimycin/platencin
CP020534.1.region002	CP0205340017	BGC0001140|Resistance_gene|ACS13710.1	4.27e-53	175	target replacement	platensimycin/platencin
CP023208.1.region002	CP0232080017	BGC0001140|Resistance_gene|ACS13710.1	4.27e-53	175	target replacement	platensimycin/platencin
CP031555.1.region002	CP0315550025	BGC0001140|Resistance_gene|ACS13710.1	1.05e-52	174	target replacement	platensimycin/platencin
CP045416.1.region003	CP0454160016	BGC0001140|Resistance_gene|ACS13710.1	7.56e-58	188	target replacement	platensimycin/platencin
CP048031.1.region001	CP0480310022	BGC0001140|Resistance_gene|ACS13710.1	4.42e-59	191	target replacement	platensimycin/platencin
LK021130.1.region003	LK0211300021	BGC0001140|Resistance_gene|ACS13710.1	4.27e-53	175	target replacement	platensimycin/platencin
MSCJ01000003.1.region001	MSCJ010000030021	BGC0001140|Resistance_gene|ACS13710.1	2.67e-32	119	target replacement	platensimycin/platencin
CP032618.1.region002	CP0326180018	BGC0001140|Resistance_gene|ACS13710.1	6.51e-61	196	target replacement	platensimycin/platencin
CP051625.1.region004	CP0516250024	BGC0001140|Resistance_gene|ACS13710.1	7.04e-56	183	target replacement	platensimycin/platencin
CP033581.1.region009	CP0335810032	BGC0001140|Resistance_gene|ACS13710.1	1.16e-31	117	target replacement	platensimycin/platencin
AP021879.1.region003	AP0218790025	BGC0001140|Resistance_gene|ACS13710.1	4.31e-52	173	target replacement	platensimycin/platencin
CP003985.1.region001	CP0039850034	BGC0001140|Resistance_gene|ACS13710.1	1.32e-52	174	target replacement	platensimycin/platencin
LS999828.1.region001	LS9998280017	BGC0001140|Resistance_gene|ACS13710.1	4.54e-42	145	target replacement	platensimycin/platencin
CP001798.1.region006	CP0017980002	BGC0001140|Resistance_gene|ACS13710.1	6.14e-54	177	target replacement	platensimycin/platencin
CP009355.1.region003	CP0093550015	BGC0001140|Resistance_gene|ACS13710.1	2.8e-56	184	target replacement	platensimycin/platencin
CR522870.1.region001	CR5228700059	BGC0001140|Resistance_gene|ACS13710.1	1.34e-52	174	target replacement	platensimycin/platencin
CP003156.1.region003	CP0031560022	BGC0001140|Resistance_gene|ACS13710.1	3.51e-35	127	target replacement	platensimycin/platencin
CP028158.1.region009	CP0281580045	BGC0001140|Resistance_gene|ACS13710.1	4.71e-48	162	target replacement	platensimycin/platencin
CP028159.1.region007	CP0281590042	BGC0001140|Resistance_gene|ACS13710.1	5.03e-48	162	target replacement	platensimycin/platencin
CP039374.2.region001	CP0393740018	BGC0001140|Resistance_gene|ACS13710.1	4.89e-57	186	target replacement	platensimycin/platencin
CP047025.1.region007	CP0470250022	BGC0001140|Resistance_gene|ACS13710.1	2.73e-55	181	target replacement	platensimycin/platencin
CP007509.1.region007	CP0075090022	BGC0001140|Resistance_gene|ACS13710.1	1.11e-56	185	target replacement	platensimycin/platencin
CP033575.1.region006	CP0335750024	BGC0001140|Resistance_gene|ACS13710.1	5.82e-59	191	target replacement	platensimycin/platencin
FO203503.1.region008	FO2035030019	BGC0001140|Resistance_gene|ACS13710.1	2.63e-51	171	target replacement	platensimycin/platencin
CP047318.1.region012	CP0473180031	BGC0001140|Resistance_gene|ACS13710.1	1.34e-31	117	target replacement	platensimycin/platencin
CP019628.1.region001	CP0196280028	BGC0001140|Resistance_gene|ACS13710.1	3.15e-53	176	target replacement	platensimycin/platencin
CP033066.1.region001	CP0330660027	BGC0001140|Resistance_gene|ACS13710.1	1.92e-53	176	target replacement	platensimycin/platencin
FO203522.1.region002	FO2035220038	BGC0001140|Resistance_gene|ACS13710.1	4.1e-40	140	target replacement	platensimycin/platencin
MSCJ01000003.1.region001	MSCJ010000030024	BGC0001140|Resistance_gene|ACS13710.1	2.4e-58	189	target replacement	platensimycin/platencin
CP021425.1.region003	CP0214250018	BGC0001140|Resistance_gene|ACS13710.1	9.52e-53	173	target replacement	platensimycin/platencin
CP050451.1.region004	CP0504510023	BGC0001140|Resistance_gene|ACS13710.1	3.52e-56	184	target replacement	platensimycin/platencin
AP018042.1.region004	AP0180420039	BGC0001140|Resistance_gene|ACS13710.1	4.28e-43	148	target replacement	platensimycin/platencin
CP039928.1.region003	CP0399280023	BGC0001140|Resistance_gene|ACS13710.1	3.6e-57	186	target replacement	platensimycin/platencin
CP041036.1.region001	CP0410360020	BGC0001140|Resistance_gene|ACS13710.1	3.6e-57	186	target replacement	platensimycin/platencin
LR215729.2.region005	LR2157290025	BGC0001140|Resistance_gene|ACS13710.1	3.72e-59	191	target replacement	platensimycin/platencin
LS483452.1.region001	LS4834520022	BGC0001140|Resistance_gene|ACS13710.1	7.99e-56	182	target replacement	platensimycin/platencin
CP000020.2.region001	CP0000200021	BGC0001140|Resistance_gene|ACS13710.1	5.25e-32	118	target replacement	platensimycin/platencin
CP014859.1.region003	CP0148590016	BGC0001140|Resistance_gene|ACS13710.1	4.45e-39	142	target replacement	platensimycin/platencin
CP002738.1.region010	CP0027380018	BGC0001140|Resistance_gene|ACS13710.1	3.43e-57	186	target replacement	platensimycin/platencin
FO203503.1.region008	FO2035030031	BGC0001140|Resistance_gene|ACS13710.1	1.91e-34	125	target replacement	platensimycin/platencin
CP024087.1.region006	CP0240870042	BGC0001140|Resistance_gene|ACS13710.1	7.92e-38	134	target replacement	platensimycin/platencin
CP042994.1.region006	CP0429940019	BGC0001140|Resistance_gene|ACS13710.1	1.63e-46	158	target replacement	platensimycin/platencin
CP031416.1.region003	CP0314160021	BGC0001140|Resistance_gene|ACS13710.1	2.44e-57	186	target replacement	platensimycin/platencin
CP028158.1.region009	CP0281580040	BGC0001140|Resistance_gene|ACS13710.1	2.19e-38	135	target replacement	platensimycin/platencin
CP028159.1.region007	CP0281590037	BGC0001140|Resistance_gene|ACS13710.1	1.63e-38	136	target replacement	platensimycin/platencin
CP001712.1.region003	CP0017120023	BGC0001140|Resistance_gene|ACS13710.1	2.93e-36	130	target replacement	platensimycin/platencin
AE017340.1.region001	AE0173400022	BGC0001140|Resistance_gene|ACS13710.1	3.14e-32	119	target replacement	platensimycin/platencin
CP031263.1.region016	CP0312630054	BGC0001140|Resistance_gene|ACS13710.1	6.27e-54	178	target replacement	platensimycin/platencin
AP011177.1.region005	AP0111770023	BGC0001140|Resistance_gene|ACS13710.1	4.96e-54	178	target replacement	platensimycin/platencin
CP000447.1.region001	CP0004470022	BGC0001140|Resistance_gene|ACS13710.1	1.69e-56	184	target replacement	platensimycin/platencin
CP000931.1.region001	CP0009310019	BGC0001140|Resistance_gene|ACS13710.1	2.21e-58	189	target replacement	platensimycin/platencin
CP014782.1.region007	CP0147820023	BGC0001140|Resistance_gene|ACS13710.1	6.01e-55	180	target replacement	platensimycin/platencin
CP041614.1.region010	CP0416140024	BGC0001140|Resistance_gene|ACS13710.1	1.94e-54	179	target replacement	platensimycin/platencin
CP043550.1.region002	CP0435500031	BGC0001140|Resistance_gene|ACS13710.1	1.49e-54	179	target replacement	platensimycin/platencin
CP043552.1.region001	CP0435520049	BGC0001140|Resistance_gene|ACS13710.1	1.49e-54	179	target replacement	platensimycin/platencin
CP046103.1.region002	CP0461030014	BGC0001140|Resistance_gene|ACS13710.1	7.91e-59	191	target replacement	platensimycin/platencin
CP029480.1.region003	CP0294800017	BGC0001140|Resistance_gene|ACS13710.1	4.59e-47	159	target replacement	platensimycin/platencin
CP036292.1.region006	CP0362920010	BGC0001140|Resistance_gene|ACS13710.1	1.71e-53	177	target replacement	platensimycin/platencin
CP036318.1.region006	CP0363180005	BGC0001140|Resistance_gene|ACS13710.1	1.71e-53	177	target replacement	platensimycin/platencin
CP016076.1.region009	CP0160760030	BGC0001140|Resistance_gene|ACS13710.1	4.48e-40	140	target replacement	platensimycin/platencin
CP016077.1.region009	CP0160770031	BGC0001140|Resistance_gene|ACS13710.1	4.48e-40	140	target replacement	platensimycin/platencin
CP054916.1.region022	CP0549160020	BGC0001140|Resistance_gene|ACS13710.1	2.83e-51	171	target replacement	platensimycin/platencin
CP044399.1.region001	CP0443990021	BGC0001140|Resistance_gene|ACS13710.1	9.73e-52	172	target replacement	platensimycin/platencin
CM001772.1.region003	CM0017720019	BGC0001140|Resistance_gene|ACS13710.1	2.98e-47	160	target replacement	platensimycin/platencin
CP014859.1.region021	CP0148590004	BGC0001140|Resistance_gene|ACS13710.1	8.75e-50	166	target replacement	platensimycin/platencin
CR354532.1.region002	CR3545320020	BGC0001140|Resistance_gene|ACS13710.1	2.65e-57	186	target replacement	platensimycin/platencin
CP025792.1.region002	CP0257920043	BGC0001140|Resistance_gene|ACS13710.1	1.25e-52	174	target replacement	platensimycin/platencin
CP033466.1.region005	CP0334660020	BGC0001140|Resistance_gene|ACS13710.1	5.49e-52	172	target replacement	platensimycin/platencin
CP054929.1.region012	CP0549290019	BGC0001140|Resistance_gene|ACS13710.1	3.98e-42	146	target replacement	platensimycin/platencin
CP001139.1.region001	CP0011390021	BGC0001140|Resistance_gene|ACS13710.1	7.67e-32	117	target replacement	platensimycin/platencin
CP032091.1.region001	CP0320910021	BGC0001140|Resistance_gene|ACS13710.1	1.84e-34	125	target replacement	platensimycin/platencin
CP058973.1.region001	CP0589730019	BGC0001140|Resistance_gene|ACS13710.1	2.54e-34	124	target replacement	platensimycin/platencin
CP059832.1.region001	CP0598320021	BGC0001140|Resistance_gene|ACS13710.1	2.54e-34	124	target replacement	platensimycin/platencin
CP017916.1.region002	CP0179160019	BGC0001140|Resistance_gene|ACS13710.1	5.04e-32	118	target replacement	platensimycin/platencin
CP000821.1.region001	CP0008210020	BGC0001140|Resistance_gene|ACS13710.1	5.09e-54	178	target replacement	platensimycin/platencin
CP000851.1.region006	CP0008510022	BGC0001140|Resistance_gene|ACS13710.1	1.88e-56	184	target replacement	platensimycin/platencin
CP046104.1.region017	CP0461040034	BGC0001140|Resistance_gene|ACS13710.1	7.78e-35	126	target replacement	platensimycin/platencin
LT629970.1.region002	LT6299700015	BGC0001140|Resistance_gene|ACS13710.1	1.23e-54	179	target replacement	platensimycin/platencin
CP054923.1.region016	CP0549230025	BGC0001140|Resistance_gene|ACS13710.1	1.73e-41	144	target replacement	platensimycin/platencin
CP061725.1.region019	CP0617250045	BGC0001140|Resistance_gene|ACS13710.1	2.83e-41	144	target replacement	platensimycin/platencin
CP018632.1.region009	CP0186320024	BGC0001140|Resistance_gene|ACS13710.1	2.67e-52	173	target replacement	platensimycin/platencin
AP019807.1.region003	AP0198070018	BGC0001140|Resistance_gene|ACS13710.1	9.73e-53	174	target replacement	platensimycin/platencin
CP003972.1.region002	CP0039720019	BGC0001140|Resistance_gene|ACS13710.1	7.7e-53	175	target replacement	platensimycin/platencin
CP007004.1.region002	CP0070040019	BGC0001140|Resistance_gene|ACS13710.1	6.93e-53	175	target replacement	platensimycin/platencin
CP017889.1.region002	CP0178890020	BGC0001140|Resistance_gene|ACS13710.1	4.46e-53	175	target replacement	platensimycin/platencin
CP017896.1.region002	CP0178960020	BGC0001140|Resistance_gene|ACS13710.1	4.46e-53	175	target replacement	platensimycin/platencin
CP017899.1.region002	CP0178990020	BGC0001140|Resistance_gene|ACS13710.1	4.46e-53	175	target replacement	platensimycin/platencin
CP017907.1.region002	CP0179070020	BGC0001140|Resistance_gene|ACS13710.1	4.46e-53	175	target replacement	platensimycin/platencin
CP017911.1.region002	CP0179110020	BGC0001140|Resistance_gene|ACS13710.1	4.46e-53	175	target replacement	platensimycin/platencin
CP017913.1.region002	CP0179130020	BGC0001140|Resistance_gene|ACS13710.1	4.46e-53	175	target replacement	platensimycin/platencin
CP017919.1.region002	CP0179190025	BGC0001140|Resistance_gene|ACS13710.1	4.46e-53	175	target replacement	platensimycin/platencin
CP023397.1.region003	CP0233970028	BGC0001140|Resistance_gene|ACS13710.1	7.05e-53	175	target replacement	platensimycin/platencin
CP034565.1.region002	CP0345650022	BGC0001140|Resistance_gene|ACS13710.1	6.93e-53	175	target replacement	platensimycin/platencin
CP045419.1.region001	CP0454190028	BGC0001140|Resistance_gene|ACS13710.1	5.2e-53	175	target replacement	platensimycin/platencin
CP001678.1.region001	CP0016780022	BGC0001140|Resistance_gene|ACS13710.1	1.08e-52	174	target replacement	platensimycin/platencin
CP013021.1.region006	CP0130210024	BGC0001140|Resistance_gene|ACS13710.1	2.26e-60	194	target replacement	platensimycin/platencin
CP056041.1.region010	CP0560410034	BGC0001140|Resistance_gene|ACS13710.1	5.66e-32	118	target replacement	platensimycin/platencin
CP029043.1.region007	CP0290430022	BGC0001140|Resistance_gene|ACS13710.1	1.6e-32	120	target replacement	platensimycin/platencin
AP013042.1.region002	AP0130420022	BGC0001140|Resistance_gene|ACS13710.1	4.14e-32	118	target replacement	platensimycin/platencin
AP017928.1.region013	AP0179280037	BGC0001140|Resistance_gene|ACS13710.1	7.82e-45	153	target replacement	platensimycin/platencin
CP029480.1.region003	CP0294800025	BGC0001140|Resistance_gene|ACS13710.1	1.94e-52	174	target replacement	platensimycin/platencin
CP065232.1.region005	CP0652320048	BGC0001140|Resistance_gene|ACS13710.1	2.82e-50	168	target replacement	platensimycin/platencin
CP001649.1.region001	CP0016490032	BGC0001140|Resistance_gene|ACS13710.1	1.98e-41	144	target replacement	platensimycin/platencin
CP018680.2.region001	CP0186800020	BGC0001140|Resistance_gene|ACS13710.1	5.06e-53	175	target replacement	platensimycin/platencin
CP039700.1.region004	CP0397000026	BGC0001140|Resistance_gene|ACS13710.1	3.25e-50	167	target replacement	platensimycin/platencin
CP045070.1.region002	CP0450700042	BGC0001140|Resistance_gene|ACS13710.1	5.06e-53	175	target replacement	platensimycin/platencin
CP002638.1.region003	CP0026380051	BGC0001140|Resistance_gene|ACS13710.1	1.93e-47	160	target replacement	platensimycin/platencin
CP031969.1.region010	CP0319690035	BGC0001140|Resistance_gene|ACS13710.1	8.51e-34	123	target replacement	platensimycin/platencin
CP029254.1.region005	CP0292540029	BGC0001140|Resistance_gene|ACS13710.1	3.2e-61	197	target replacement	platensimycin/platencin
LS483250.1.region001	LS4832500055	BGC0001140|Resistance_gene|ACS13710.1	1.38e-53	177	target replacement	platensimycin/platencin
CP015641.1.region003	CP0156410015	BGC0001140|Resistance_gene|ACS13710.1	6.26e-53	175	target replacement	platensimycin/platencin
CP040451.1.region001	CP0404510004	BGC0001140|Resistance_gene|ACS13710.1	3.97e-53	175	target replacement	platensimycin/platencin
CP043617.1.region001	CP0436170031	BGC0001140|Resistance_gene|ACS13710.1	2.41e-58	189	target replacement	platensimycin/platencin
CP001707.1.region003	CP0017070022	BGC0001140|Resistance_gene|ACS13710.1	8.5e-31	115	target replacement	platensimycin/platencin
CP046104.1.region017	CP0461040038	BGC0001140|Resistance_gene|ACS13710.1	3.54e-37	133	target replacement	platensimycin/platencin
CP056041.1.region045	CP0560410018	BGC0001140|Resistance_gene|ACS13710.1	4.48e-45	154	target replacement	platensimycin/platencin
LN554852.1.region004	LN5548520022	BGC0001140|Resistance_gene|ACS13710.1	6.61e-52	172	target replacement	platensimycin/platencin
LS999828.1.region001	LS9998280025	BGC0001140|Resistance_gene|ACS13710.1	6.94e-49	164	target replacement	platensimycin/platencin
CP010883.1.region002	CP0108830020	BGC0001140|Resistance_gene|ACS13710.1	1.46e-52	174	target replacement	platensimycin/platencin
CP014040.1.region002	CP0140400022	BGC0001140|Resistance_gene|ACS13710.1	6.06e-52	172	target replacement	platensimycin/platencin
CP014636.1.region001	CP0146360022	BGC0001140|Resistance_gene|ACS13710.1	3.52e-55	181	target replacement	platensimycin/platencin
CP015512.1.region003	CP0155120021	BGC0001140|Resistance_gene|ACS13710.1	7.35e-55	180	target replacement	platensimycin/platencin
CP016321.1.region003	CP0163210030	BGC0001140|Resistance_gene|ACS13710.1	3.52e-55	181	target replacement	platensimycin/platencin
CP020034.1.region003	CP0200340024	BGC0001140|Resistance_gene|ACS13710.1	6.06e-52	172	target replacement	platensimycin/platencin
CP028141.1.region002	CP0281410024	BGC0001140|Resistance_gene|ACS13710.1	7.24e-52	172	target replacement	platensimycin/platencin
CP028342.1.region002	CP0283420024	BGC0001140|Resistance_gene|ACS13710.1	7.24e-52	172	target replacement	platensimycin/platencin
CP033141.1.region003	CP0331410024	BGC0001140|Resistance_gene|ACS13710.1	6.06e-52	172	target replacement	platensimycin/platencin
CP034759.1.region003	CP0347590057	BGC0001140|Resistance_gene|ACS13710.1	1.02e-53	177	target replacement	platensimycin/platencin
CP065369.1.region002	CP0653690024	BGC0001140|Resistance_gene|ACS13710.1	1.46e-52	174	target replacement	platensimycin/platencin
CP016076.1.region003	CP0160760019	BGC0001140|Resistance_gene|ACS13710.1	1.56e-36	135	target replacement	platensimycin/platencin
CP016077.1.region003	CP0160770019	BGC0001140|Resistance_gene|ACS13710.1	1.56e-36	135	target replacement	platensimycin/platencin
AE017340.1.region001	AE0173400025	BGC0001140|Resistance_gene|ACS13710.1	5.96e-51	170	target replacement	platensimycin/platencin
CP033581.1.region026	CP0335810044	BGC0001140|Resistance_gene|ACS13710.1	3.62e-34	125	target replacement	platensimycin/platencin
CP036200.1.region001	CP0362000020	BGC0001140|Resistance_gene|ACS13710.1	3.93e-56	183	target replacement	platensimycin/platencin
CP001805.1.region004	CP0018050024	BGC0001140|Resistance_gene|ACS13710.1	1.91e-51	171	target replacement	platensimycin/platencin
CP013484.1.region004	CP0134840020	BGC0001140|Resistance_gene|ACS13710.1	4.19e-51	170	target replacement	platensimycin/platencin
CP014053.1.region004	CP0140530022	BGC0001140|Resistance_gene|ACS13710.1	4.19e-51	170	target replacement	platensimycin/platencin
CP016224.1.region002	CP0162240020	BGC0001140|Resistance_gene|ACS13710.1	1.84e-51	171	target replacement	platensimycin/platencin
CP017916.1.region002	CP0179160016	BGC0001140|Resistance_gene|ACS13710.1	2.81e-50	168	target replacement	platensimycin/platencin
CP024199.1.region005	CP0241990026	BGC0001140|Resistance_gene|ACS13710.1	5.92e-51	170	target replacement	platensimycin/platencin
CP032213.1.region002	CP0322130021	BGC0001140|Resistance_gene|ACS13710.1	4.19e-51	170	target replacement	platensimycin/platencin
CP033137.1.region003	CP0331370022	BGC0001140|Resistance_gene|ACS13710.1	7.62e-53	175	target replacement	platensimycin/platencin
CP041332.1.region003	CP0413320019	BGC0001140|Resistance_gene|ACS13710.1	4.93e-49	164	target replacement	platensimycin/platencin
CP041332.1.region003	CP0413320022	BGC0001140|Resistance_gene|ACS13710.1	1.75e-34	125	target replacement	platensimycin/platencin
CP031010.1.region005	CP0310100018	BGC0001140|Resistance_gene|ACS13710.1	4.92e-55	181	target replacement	platensimycin/platencin
CP000142.2.region006	CP0001420020	BGC0001140|Resistance_gene|ACS13710.1	6.4e-41	142	target replacement	platensimycin/platencin
CP006664.1.region004	CP0066640019	BGC0001140|Resistance_gene|ACS13710.1	1.22e-49	166	target replacement	platensimycin/platencin
CP034425.1.region002	CP0344250014	BGC0001140|Resistance_gene|ACS13710.1	1.24e-56	185	target replacement	platensimycin/platencin
CP029188.1.region003	CP0291880027	BGC0001140|Resistance_gene|ACS13710.1	9.93e-34	123	target replacement	platensimycin/platencin
CP009261.1.region002	CP0092610021	BGC0001140|Resistance_gene|ACS13710.1	4.87e-54	178	target replacement	platensimycin/platencin
CP013826.1.region003	CP0138260024	BGC0001140|Resistance_gene|ACS13710.1	4.75e-51	170	target replacement	platensimycin/platencin
CP019290.1.region001	CP0192900025	BGC0001140|Resistance_gene|ACS13710.1	2.59e-54	179	target replacement	platensimycin/platencin
CP003156.1.region001	CP0031560020	BGC0001140|Resistance_gene|ACS13710.1	9.61e-44	151	target replacement	platensimycin/platencin
CP056041.1.region004	CP0560410030	BGC0001140|Resistance_gene|ACS13710.1	7.91e-43	148	target replacement	platensimycin/platencin
CP047023.1.region005	CP0470230032	BGC0001140|Resistance_gene|ACS13710.1	3.72e-52	173	target replacement	platensimycin/platencin
CP010406.1.region005	CP0104060021	BGC0001140|Resistance_gene|ACS13710.1	7.09e-40	140	target replacement	platensimycin/platencin
CP017775.1.region002	CP0177750018	BGC0001140|Resistance_gene|ACS13710.1	2.36e-39	139	target replacement	platensimycin/platencin
CP009467.2.region003	CP0094670020	BGC0001140|Resistance_gene|ACS13710.1	8.2e-52	172	target replacement	platensimycin/platencin
CP018308.1.region003	CP0183080024	BGC0001140|Resistance_gene|ACS13710.1	4.87e-51	170	target replacement	platensimycin/platencin
CP033577.1.region001	CP0335770024	BGC0001140|Resistance_gene|ACS13710.1	5.02e-51	170	target replacement	platensimycin/platencin
CP034970.1.region002	CP0349700027	BGC0001140|Resistance_gene|ACS13710.1	1.57e-49	166	target replacement	platensimycin/platencin
CR354532.1.region002	CR3545320023	BGC0001140|Resistance_gene|ACS13710.1	2.76e-31	115	target replacement	platensimycin/platencin
CP030097.1.region002	CP0300970019	BGC0001140|Resistance_gene|ACS13710.1	6.02e-40	140	target replacement	platensimycin/platencin
CP001135.1.region002	CP0011350016	BGC0001140|Resistance_gene|ACS13710.1	1.02e-48	164	target replacement	platensimycin/platencin
CP021707.1.region015	CP0217070048	BGC0001140|Resistance_gene|ACS13710.1	3.78e-31	116	target replacement	platensimycin/platencin
CP035952.1.region002	CP0359520016	BGC0001140|Resistance_gene|ACS13710.1	3.35e-57	186	target replacement	platensimycin/platencin
CP054923.1.region009	CP0549230026	BGC0001140|Resistance_gene|ACS13710.1	1.56e-39	139	target replacement	platensimycin/platencin
CP029254.1.region011	CP0292540019	BGC0001140|Resistance_gene|ACS13710.1	2.85e-43	149	target replacement	platensimycin/platencin
CP029052.1.region006	CP0290520027	BGC0001140|Resistance_gene|ACS13710.1	2.47e-54	179	target replacement	platensimycin/platencin
CP040443.1.region001	CP0404430028	BGC0001140|Resistance_gene|ACS13710.1	7.36e-52	172	target replacement	platensimycin/platencin
WAHT01000008.1.region001	WAHT010000080021	BGC0001140|Resistance_gene|ACS13710.1	9.77e-51	169	target replacement	platensimycin/platencin
CP016796.1.region005	CP0167960021	BGC0001140|Resistance_gene|ACS13710.1	5.54e-54	177	target replacement	platensimycin/platencin
CP056041.1.region032	CP0560410035	BGC0001140|Resistance_gene|ACS13710.1	7.1e-33	121	target replacement	platensimycin/platencin
CP061938.1.region003	CP0619380018	BGC0001140|Resistance_gene|ACS13710.1	1.04e-39	140	target replacement	platensimycin/platencin
CP004404.1.region001	CP0044040011	BGC0001140|Resistance_gene|ACS13710.1	1.35e-52	174	target replacement	platensimycin/platencin
CP000667.1.region006	CP0006670034	BGC0001140|Resistance_gene|ACS13710.1	1.66e-35	129	target replacement	platensimycin/platencin
CP012418.1.region002	CP0124180025	BGC0001140|Resistance_gene|ACS13710.1	2.13e-50	168	target replacement	platensimycin/platencin
CP029064.1.region001	CP0290640025	BGC0001140|Resistance_gene|ACS13710.1	8.5e-52	172	target replacement	platensimycin/platencin
CP042476.1.region002	CP0424760022	BGC0001140|Resistance_gene|ACS13710.1	1.46e-36	131	target replacement	platensimycin/platencin
CP014859.1.region008	CP0148590035	BGC0001140|Resistance_gene|ACS13710.1	9.43e-37	132	target replacement	platensimycin/platencin
CU207366.1.region002	CU2073660016	BGC0001140|Resistance_gene|ACS13710.1	3.67e-39	138	target replacement	platensimycin/platencin
LT629745.1.region002	LT6297450024	BGC0001140|Resistance_gene|ACS13710.1	7.43e-44	150	target replacement	platensimycin/platencin
CP006664.1.region004	CP0066640022	BGC0001140|Resistance_gene|ACS13710.1	9.51e-34	123	target replacement	platensimycin/platencin
CP017599.1.region032	CP0175990021	BGC0001140|Resistance_gene|ACS13710.1	5.68e-39	137	target replacement	platensimycin/platencin
CP031963.1.region008	CP0319630012	BGC0001140|Resistance_gene|ACS13710.1	1.72e-47	160	target replacement	platensimycin/platencin
CP041329.1.region006	CP0413290023	BGC0001140|Resistance_gene|ACS13710.1	2.85e-50	168	target replacement	platensimycin/platencin
CP010975.1.region003	CP0109750026	BGC0001140|Resistance_gene|ACS13710.1	4.3e-51	170	target replacement	platensimycin/platencin
CP054938.1.region018	CP0549380030	BGC0001140|Resistance_gene|ACS13710.1	1.39e-32	120	target replacement	platensimycin/platencin
CP000667.1.region014	CP0006670044	BGC0001140|Resistance_gene|ACS13710.1	1.72e-42	147	target replacement	platensimycin/platencin
CP022356.1.region002	CP0223560026	BGC0001140|Resistance_gene|ACS13710.1	6.49e-34	123	target replacement	platensimycin/platencin
CP031966.1.region002	CP0319660020	BGC0001140|Resistance_gene|ACS13710.1	2.92e-40	141	target replacement	platensimycin/platencin
CP047026.1.region002	CP0470260019	BGC0001140|Resistance_gene|ACS13710.1	5.51e-34	124	target replacement	platensimycin/platencin
CP000020.2.region001	CP0000200024	BGC0001140|Resistance_gene|ACS13710.1	6.45e-54	177	target replacement	platensimycin/platencin
CP001139.1.region001	CP0011390024	BGC0001140|Resistance_gene|ACS13710.1	6.45e-54	177	target replacement	platensimycin/platencin
CP040813.1.region002	CP0408130021	BGC0001140|Resistance_gene|ACS13710.1	3.91e-40	141	target replacement	platensimycin/platencin
CP025120.1.region002	CP0251200026	BGC0001140|Resistance_gene|ACS13710.1	9.71e-51	169	target replacement	platensimycin/platencin
CP025990.1.region006	CP0259900029	BGC0001140|Resistance_gene|ACS13710.1	1.04e-36	132	target replacement	platensimycin/platencin
CP003221.1.region004	CP0032210022	BGC0001140|Resistance_gene|ACS13710.1	2.42e-39	139	target replacement	platensimycin/platencin
CP001707.1.region003	CP0017070025	BGC0001140|Resistance_gene|ACS13710.1	7.79e-51	169	target replacement	platensimycin/platencin
CP036272.1.region002	CP0362720011	BGC0001140|Resistance_gene|ACS13710.1	2.2e-49	166	target replacement	platensimycin/platencin
LS999833.1.region004	LS9998330023	BGC0001140|Resistance_gene|ACS13710.1	3.86e-50	168	target replacement	platensimycin/platencin
CP009889.1.region001	CP0098890016	BGC0001140|Resistance_gene|ACS13710.1	1.24e-47	161	target replacement	platensimycin/platencin
CP020038.1.region010	CP0200380057	BGC0001140|Resistance_gene|ACS13710.1	1.32e-50	169	target replacement	platensimycin/platencin
CP031263.1.region012	CP0312630033	BGC0001140|Resistance_gene|ACS13710.1	1.09e-32	120	target replacement	platensimycin/platencin
CP031966.1.region002	CP0319660034	BGC0001140|Resistance_gene|ACS13710.1	2.74e-45	154	target replacement	platensimycin/platencin
CP042476.1.region003	CP0424760019	BGC0001140|Resistance_gene|ACS13710.1	1.03e-42	147	target replacement	platensimycin/platencin
CP022132.1.region005	CP0221320020	BGC0001140|Resistance_gene|ACS13710.1	8.37e-55	180	target replacement	platensimycin/platencin
CP040749.1.region004	CP0407490049	BGC0001140|Resistance_gene|ACS13710.1	6.78e-47	159	target replacement	platensimycin/platencin
CP003156.1.region003	CP0031560014	BGC0001140|Resistance_gene|ACS13710.1	1.77e-46	158	target replacement	platensimycin/platencin
CP036264.1.region001	CP0362640007	BGC0001140|Resistance_gene|ACS13710.1	1.69e-47	161	target replacement	platensimycin/platencin
CP003156.1.region002	CP0031560020	BGC0001140|Resistance_gene|ACS13710.1	4.59e-45	154	target replacement	platensimycin/platencin
CP031969.1.region015	CP0319690051	BGC0001140|Resistance_gene|ACS13710.1	4.92e-34	124	target replacement	platensimycin/platencin
CP009889.1.region001	CP0098890019	BGC0001140|Resistance_gene|ACS13710.1	1.61e-34	125	target replacement	platensimycin/platencin
CP034834.1.region004	CP0348340049	BGC0001140|Resistance_gene|ACS13710.1	5.18e-31	119	target replacement	platensimycin/platencin
CP031965.1.region003	CP0319650017	BGC0001140|Resistance_gene|ACS13710.1	5.75e-42	146	target replacement	platensimycin/platencin
CP002771.1.region002	CP0027710019	BGC0001140|Resistance_gene|ACS13710.1	4.18e-55	181	target replacement	platensimycin/platencin
LN554846.1.region001	LN5548460024	BGC0001140|Resistance_gene|ACS13710.1	5.95e-53	175	target replacement	platensimycin/platencin
CP021780.1.region002	CP0217800023	BGC0001140|Resistance_gene|ACS13710.1	1.41e-41	144	target replacement	platensimycin/platencin
CP004349.1.region002	CP0043490022	BGC0001140|Resistance_gene|ACS13710.1	2.16e-34	125	target replacement	platensimycin/platencin
CP028136.1.region002	CP0281360021	BGC0001140|Resistance_gene|ACS13710.1	5.13e-37	132	target replacement	platensimycin/platencin
LR884459.1.region002	LR8844590018	BGC0001140|Resistance_gene|ACS13710.1	8.9e-43	148	target replacement	platensimycin/platencin
CP024087.1.region007	CP0240870035	BGC0001140|Resistance_gene|ACS13710.1	6.59e-33	121	target replacement	platensimycin/platencin
CP020038.1.region010	CP0200380077	BGC0001140|Resistance_gene|ACS13710.1	7.18e-50	167	target replacement	platensimycin/platencin
CP020038.1.region001	CP0200380016	BGC0001140|Resistance_gene|ACS13710.1	6.87e-47	159	target replacement	platensimycin/platencin
CP024052.1.region003	CP0240520034	BGC0001140|Resistance_gene|ACS13710.1	2.54e-32	119	target replacement	platensimycin/platencin
CP002528.1.region004	CP0025280022	BGC0001140|Resistance_gene|ACS13710.1	3.29e-38	136	target replacement	platensimycin/platencin
CP029151.1.region003	CP0291510009	BGC0001140|Resistance_gene|ACS13710.1	3.92e-39	138	target replacement	platensimycin/platencin
LT899436.1.region001	LT8994360019	BGC0001140|Resistance_gene|ACS13710.1	1.46e-35	129	target replacement	platensimycin/platencin
CP033582.1.region001	CP0335820024	BGC0001140|Resistance_gene|ACS13710.1	4.98e-39	137	target replacement	platensimycin/platencin
LS483452.1.region001	LS4834520019	BGC0001140|Resistance_gene|ACS13710.1	1.38e-33	122	target replacement	platensimycin/platencin
CP028158.1.region008	CP0281580031	BGC0001140|Resistance_gene|ACS13710.1	7.44e-34	124	target replacement	platensimycin/platencin
CP028159.1.region006	CP0281590031	BGC0001140|Resistance_gene|ACS13710.1	7.66e-34	124	target replacement	platensimycin/platencin
CP002831.1.region002	CP0028310016	BGC0001140|Resistance_gene|ACS13710.1	1.69e-38	137	target replacement	platensimycin/platencin
CP034240.1.region001	CP0342400021	BGC0001140|Resistance_gene|ACS13710.1	8.75e-50	167	target replacement	platensimycin/platencin
FM178379.1.region002	FM1783790021	BGC0001140|Resistance_gene|ACS13710.1	7.17e-50	167	target replacement	platensimycin/platencin
CP040751.1.region002	CP0407510024	BGC0001140|Resistance_gene|ACS13710.1	1.01e-46	158	target replacement	platensimycin/platencin
CP061947.1.region008	CP0619470020	BGC0001140|Resistance_gene|ACS13710.1	3.42e-50	167	target replacement	platensimycin/platencin
CP021425.1.region009	CP0214250017	BGC0001140|Resistance_gene|ACS13710.1	1.53e-43	150	target replacement	platensimycin/platencin
CP068439.1.region001	CP0684390015	BGC0001140|Resistance_gene|ACS13710.1	3.37e-44	152	target replacement	platensimycin/platencin
CP015125.1.region004	CP0151250023	BGC0001140|Resistance_gene|ACS13710.1	1.14e-37	134	target replacement	platensimycin/platencin
CP025119.1.region002	CP0251190019	BGC0001140|Resistance_gene|ACS13710.1	5.83e-31	116	target replacement	platensimycin/platencin
AP011177.1.region005	AP0111770020	BGC0001140|Resistance_gene|ACS13710.1	5.14e-33	121	target replacement	platensimycin/platencin
CP002825.1.region002	CP0028250008	BGC0001140|Resistance_gene|ACS13710.1	1.82e-47	160	target replacement	platensimycin/platencin
CP025118.1.region002	CP0251180025	BGC0001140|Resistance_gene|ACS13710.1	2.98e-33	122	target replacement	platensimycin/platencin
FO203522.1.region002	FO2035220036	BGC0001140|Resistance_gene|ACS13710.1	2.04e-41	144	target replacement	platensimycin/platencin
CP007206.1.region002	CP0072060035	BGC0001140|Resistance_gene|ACS13710.1	1.07e-43	150	target replacement	platensimycin/platencin
CP007207.1.region002	CP0072070036	BGC0001140|Resistance_gene|ACS13710.1	1.07e-43	150	target replacement	platensimycin/platencin
CP007627.1.region002	CP0076270037	BGC0001140|Resistance_gene|ACS13710.1	1.07e-43	150	target replacement	platensimycin/platencin
CP008878.1.region002	CP0088780035	BGC0001140|Resistance_gene|ACS13710.1	1.07e-43	150	target replacement	platensimycin/platencin
CP008881.1.region002	CP0088810035	BGC0001140|Resistance_gene|ACS13710.1	1.07e-43	150	target replacement	platensimycin/platencin
CP008883.1.region002	CP0088830035	BGC0001140|Resistance_gene|ACS13710.1	1.07e-43	150	target replacement	platensimycin/platencin
CP010275.2.region002	CP0102750035	BGC0001140|Resistance_gene|ACS13710.1	1.07e-43	150	target replacement	platensimycin/platencin
CP010276.2.region002	CP0102760035	BGC0001140|Resistance_gene|ACS13710.1	1.07e-43	150	target replacement	platensimycin/platencin
CP010277.2.region002	CP0102770035	BGC0001140|Resistance_gene|ACS13710.1	1.07e-43	150	target replacement	platensimycin/platencin
LT670843.1.region002	LT6708430036	BGC0001140|Resistance_gene|ACS13710.1	1.07e-43	150	target replacement	platensimycin/platencin
CM001837.1.region004	CM0018370022	BGC0001140|Resistance_gene|ACS13710.1	2.81e-37	133	target replacement	platensimycin/platencin
CP025117.1.region001	CP0251170016	BGC0001140|Resistance_gene|ACS13710.1	6.88e-32	118	target replacement	platensimycin/platencin
CP010535.1.region002	CP0105350022	BGC0001140|Resistance_gene|ACS13710.1	8.85e-34	124	target replacement	platensimycin/platencin
CP012872.1.region001	CP0128720018	BGC0001140|Resistance_gene|ACS13710.1	1.51e-35	128	target replacement	platensimycin/platencin
CP048685.1.region005	CP0486850008	BGC0001140|Resistance_gene|ACS13710.1	2.95e-38	136	target replacement	platensimycin/platencin
CP002638.1.region016	CP0026380031	BGC0001140|Resistance_gene|ACS13710.1	3.26e-33	122	target replacement	platensimycin/platencin
LT629302.1.region002	LT6293020020	BGC0001140|Resistance_gene|ACS13710.1	4.95e-45	154	target replacement	platensimycin/platencin
AP018042.1.region004	AP0180420018	BGC0001140|Resistance_gene|ACS13710.1	9.79e-41	142	target replacement	platensimycin/platencin
CP054939.1.region008	CP0549390020	BGC0001140|Resistance_gene|ACS13710.1	8.32e-40	140	target replacement	platensimycin/platencin
CP047028.1.region002	CP0470280034	BGC0001140|Resistance_gene|ACS13710.1	8.48e-43	147	target replacement	platensimycin/platencin
LT629741.1.region001	LT6297410022	BGC0001140|Resistance_gene|ACS13710.1	7.98e-39	137	target replacement	platensimycin/platencin
CP025116.1.region002	CP0251160011	BGC0001140|Resistance_gene|ACS13710.1	1.06e-34	126	target replacement	platensimycin/platencin
CP040749.1.region002	CP0407490026	BGC0001140|Resistance_gene|ACS13710.1	2.7e-36	130	target replacement	platensimycin/platencin
LT629741.1.region002	LT6297410022	BGC0001140|Resistance_gene|ACS13710.1	6.03e-38	135	target replacement	platensimycin/platencin
CP002046.1.region002	CP0020460021	BGC0001140|Resistance_gene|ACS13710.1	1.11e-41	145	target replacement	platensimycin/platencin
CP020570.1.region027	CP0205700024	BGC0001140|Resistance_gene|ACS13710.1	2.93e-31	115	target replacement	platensimycin/platencin
CP027062.1.region003	CP0270620023	BGC0001140|Resistance_gene|ACS13710.1	1.85e-33	123	target replacement	platensimycin/platencin
CP039935.1.region004	CP0399350022	BGC0001140|Resistance_gene|ACS13710.1	6.94e-40	140	target replacement	platensimycin/platencin
CP016359.1.region002	CP0163590017	BGC0001140|Resistance_gene|ACS13710.1	2.48e-36	130	target replacement	platensimycin/platencin
CP020570.1.region027	CP0205700023	BGC0001140|Resistance_gene|ACS13710.1	5.25e-43	149	target replacement	platensimycin/platencin
CP025938.1.region002	CP0259380026	BGC0001140|Resistance_gene|ACS13710.1	3.2e-40	140	target replacement	platensimycin/platencin
CR522870.1.region001	CR5228700049	BGC0001140|Resistance_gene|ACS13710.1	1.33e-33	122	target replacement	platensimycin/platencin
CP009301.1.region001	CP0093010009	BGC0001140|Resistance_gene|ACS13710.1	1.12e-36	132	target replacement	platensimycin/platencin
AP019860.1.region011	AP0198600020	BGC0001140|Resistance_gene|ACS13710.1	5.52e-39	137	target replacement	platensimycin/platencin
FO203503.1.region004	FO2035030013	BGC0001140|Resistance_gene|ACS13710.1	8.09e-34	128	target replacement	platensimycin/platencin
CP001649.1.region001	CP0016490030	BGC0001140|Resistance_gene|ACS13710.1	8.29e-46	156	target replacement	platensimycin/platencin
CP022957.1.region002	CP0229570014	BGC0001140|Resistance_gene|ACS13710.1	6.22e-46	156	target replacement	platensimycin/platencin
AP019860.1.region017	AP0198600018	BGC0001140|Resistance_gene|ACS13710.1	6.94e-36	129	target replacement	platensimycin/platencin
CP031759.1.region007	CP0317590070	BGC0001140|Resistance_gene|ACS13710.1	3.99e-42	147	target replacement	platensimycin/platencin
CP017477.1.region002	CP0174770019	BGC0001140|Resistance_gene|ACS13710.1	6.91e-34	124	target replacement	platensimycin/platencin
CP032050.1.region006	CP0320500015	BGC0001140|Resistance_gene|ACS13710.1	1.28e-44	153	target replacement	platensimycin/platencin
CP030885.1.region005	CP0308850016	BGC0001140|Resistance_gene|ACS13710.1	7.86e-32	122	target replacement	platensimycin/platencin
CP029052.1.region003	CP0290520022	BGC0001140|Resistance_gene|ACS13710.1	8e-40	140	target replacement	platensimycin/platencin
CP029609.1.region005	CP0296090022	BGC0001140|Resistance_gene|ACS13710.1	8e-40	140	target replacement	platensimycin/platencin
CP030925.1.region004	CP0309250022	BGC0001140|Resistance_gene|ACS13710.1	1.19e-39	139	target replacement	platensimycin/platencin
CP060417.1.region004	CP0604170022	BGC0001140|Resistance_gene|ACS13710.1	1.19e-39	139	target replacement	platensimycin/platencin
CP002377.1.region004	CP0023770019	BGC0001140|Resistance_gene|ACS13710.1	2.42e-34	124	target replacement	platensimycin/platencin
CP021780.1.region001	CP0217800053	BGC0001140|Resistance_gene|ACS13710.1	3.23e-44	152	target replacement	platensimycin/platencin
CP003539.1.region002	CP0035390021	BGC0001140|Resistance_gene|ACS13710.1	8.48e-34	123	target replacement	platensimycin/platencin
CP036313.1.region004	CP0363130041	BGC0001140|Resistance_gene|ACS13710.1	1.58e-42	147	target replacement	platensimycin/platencin
AP014548.1.region003	AP0145480023	BGC0001140|Resistance_gene|ACS13710.1	1.08e-38	137	target replacement	platensimycin/platencin
CP054939.1.region023	CP0549390028	BGC0001140|Resistance_gene|ACS13710.1	3.71e-32	119	target replacement	platensimycin/platencin
CP017708.1.region037	CP0177080023	BGC0001140|Resistance_gene|ACS13710.1	4.24e-35	127	target replacement	platensimycin/platencin
CP010797.1.region012	CP0107970021	BGC0001140|Resistance_gene|ACS13710.1	2.69e-40	141	target replacement	platensimycin/platencin
CP054916.1.region019	CP0549160030	BGC0001140|Resistance_gene|ACS13710.1	2.14e-37	134	target replacement	platensimycin/platencin
AP021879.1.region007	AP0218790018	BGC0001140|Resistance_gene|ACS13710.1	9.59e-42	145	target replacement	platensimycin/platencin
CP002453.1.region003	CP0024530021	BGC0001140|Resistance_gene|ACS13710.1	2.79e-34	125	target replacement	platensimycin/platencin
CP015381.1.region005	CP0153810021	BGC0001140|Resistance_gene|ACS13710.1	5.81e-33	127	target replacement	platensimycin/platencin
CP032050.1.region006	CP0320500031	BGC0001140|Resistance_gene|ACS13710.1	4.01e-40	140	target replacement	platensimycin/platencin
CP054916.1.region017	CP0549160036	BGC0001140|Resistance_gene|ACS13710.1	3.82e-31	116	target replacement	platensimycin/platencin
CP001650.1.region002	CP0016500016	BGC0001140|Resistance_gene|ACS13710.1	1.11e-44	152	target replacement	platensimycin/platencin
CP000851.1.region006	CP0008510019	BGC0001140|Resistance_gene|ACS13710.1	6.45e-31	115	target replacement	platensimycin/platencin
CP003985.1.region001	CP0039850013	BGC0001140|Resistance_gene|ACS13710.1	9.73e-40	140	target replacement	platensimycin/platencin
LT629737.1.region002	LT6297370023	BGC0001140|Resistance_gene|ACS13710.1	8.04e-37	131	target replacement	platensimycin/platencin
CP020038.1.region010	CP0200380030	BGC0001140|Resistance_gene|ACS13710.1	1.78e-46	158	target replacement	platensimycin/platencin
LT629302.1.region003	LT6293020019	BGC0001140|Resistance_gene|ACS13710.1	3.67e-32	119	target replacement	platensimycin/platencin
AP021874.1.region004	AP0218740020	BGC0001140|Resistance_gene|ACS13710.1	2.15e-32	125	target replacement	platensimycin/platencin
CP025791.1.region002	CP0257910032	BGC0001140|Resistance_gene|ACS13710.1	1.87e-39	139	target replacement	platensimycin/platencin
CP049616.1.region003	CP0496160015	BGC0001140|Resistance_gene|ACS13710.1	3.18e-34	125	target replacement	platensimycin/platencin
CP031964.1.region001	CP0319640026	BGC0001140|Resistance_gene|ACS13710.1	4.38e-34	124	target replacement	platensimycin/platencin
LT629745.1.region003	LT6297450022	BGC0001140|Resistance_gene|ACS13710.1	1.54e-34	125	target replacement	platensimycin/platencin
CP009288.1.region006	CP0092880020	BGC0001140|Resistance_gene|ACS13710.1	3.31e-41	144	target replacement	platensimycin/platencin
CP030104.1.region005	CP0301040018	BGC0001140|Resistance_gene|ACS13710.1	1.37e-33	123	target replacement	platensimycin/platencin
CP031966.1.region001	CP0319660020	BGC0001140|Resistance_gene|ACS13710.1	3.75e-37	133	target replacement	platensimycin/platencin
LT629737.1.region003	LT6297370023	BGC0001140|Resistance_gene|ACS13710.1	2.35e-31	117	target replacement	platensimycin/platencin
CP022356.1.region002	CP0223560029	BGC0001140|Resistance_gene|ACS13710.1	1.39e-51	171	target replacement	platensimycin/platencin
CP022957.1.region004	CP0229570022	BGC0001140|Resistance_gene|ACS13710.1	1.07e-32	120	target replacement	platensimycin/platencin
AP021875.1.region005	AP0218750019	BGC0001140|Resistance_gene|ACS13710.1	1.18e-38	137	target replacement	platensimycin/platencin
LT627735.1.region001	LT6277350013	BGC0001140|Resistance_gene|ACS13710.1	1.92e-38	137	target replacement	platensimycin/platencin
CP034240.1.region001	CP0342400024	BGC0001140|Resistance_gene|ACS13710.1	4.38e-31	115	target replacement	platensimycin/platencin
FM178379.1.region002	FM1783790024	BGC0001140|Resistance_gene|ACS13710.1	3.86e-31	116	target replacement	platensimycin/platencin
CP028136.1.region003	CP0281360016	BGC0001140|Resistance_gene|ACS13710.1	2.94e-36	130	target replacement	platensimycin/platencin
CU207366.1.region001	CU2073660026	BGC0001140|Resistance_gene|ACS13710.1	1.05e-36	132	target replacement	platensimycin/platencin
CP068439.1.region001	CP0684390031	BGC0001140|Resistance_gene|ACS13710.1	4.82e-41	143	target replacement	platensimycin/platencin
CP022957.1.region002	CP0229570030	BGC0001140|Resistance_gene|ACS13710.1	8.79e-36	129	target replacement	platensimycin/platencin
CP025938.1.region001	CP0259380015	BGC0001140|Resistance_gene|ACS13710.1	5.24e-41	143	target replacement	platensimycin/platencin
CP002046.1.region002	CP0020460013	BGC0001140|Resistance_gene|ACS13710.1	3.25e-35	127	target replacement	platensimycin/platencin
CP054929.1.region015	CP0549290022	BGC0001140|Resistance_gene|ACS13710.1	5.94e-34	124	target replacement	platensimycin/platencin
CP058649.1.region003	CP0586490044	BGC0001140|Resistance_gene|ACS13710.1	1.88e-37	133	target replacement	platensimycin/platencin
CP009887.1.region004	CP0098870020	BGC0001140|Resistance_gene|ACS13710.1	8.12e-31	115	target replacement	platensimycin/platencin
CP047027.1.region003	CP0470270022	BGC0001140|Resistance_gene|ACS13710.1	1.93e-31	117	target replacement	platensimycin/platencin
CP000961.1.region009	CP0009610021	BGC0001140|Resistance_gene|ACS13710.1	6.32e-33	120	target replacement	platensimycin/platencin
CP003169.1.region007	CP0031690018	BGC0001140|Resistance_gene|ACS13710.1	3.46e-31	121	target replacement	platensimycin/platencin
CP007206.1.region002	CP0072060016	BGC0001140|Resistance_gene|ACS13710.1	2.93e-38	135	target replacement	platensimycin/platencin
CP007207.1.region002	CP0072070017	BGC0001140|Resistance_gene|ACS13710.1	1.19e-37	134	target replacement	platensimycin/platencin
CP007627.1.region002	CP0076270017	BGC0001140|Resistance_gene|ACS13710.1	3.7e-38	135	target replacement	platensimycin/platencin
CP008878.1.region002	CP0088780016	BGC0001140|Resistance_gene|ACS13710.1	3.7e-38	135	target replacement	platensimycin/platencin
CP008881.1.region002	CP0088810016	BGC0001140|Resistance_gene|ACS13710.1	3.7e-38	135	target replacement	platensimycin/platencin
CP008883.1.region002	CP0088830016	BGC0001140|Resistance_gene|ACS13710.1	3.7e-38	135	target replacement	platensimycin/platencin
CP010275.2.region002	CP0102750016	BGC0001140|Resistance_gene|ACS13710.1	3.7e-38	135	target replacement	platensimycin/platencin
CP010276.2.region002	CP0102760016	BGC0001140|Resistance_gene|ACS13710.1	3.7e-38	135	target replacement	platensimycin/platencin
CP010277.2.region002	CP0102770016	BGC0001140|Resistance_gene|ACS13710.1	3.7e-38	135	target replacement	platensimycin/platencin
CP040749.1.region004	CP0407490017	BGC0001140|Resistance_gene|ACS13710.1	5.41e-37	132	target replacement	platensimycin/platencin
CP021780.1.region012	CP0217800018	BGC0001140|Resistance_gene|ACS13710.1	1.85e-35	127	target replacement	platensimycin/platencin
CP031963.1.region001	CP0319630021	BGC0001140|Resistance_gene|ACS13710.1	9.99e-33	120	target replacement	platensimycin/platencin
CP041687.1.region003	CP0416870013	BGC0001140|Resistance_gene|ACS13710.1	3.54e-33	122	target replacement	platensimycin/platencin
CP002825.1.region002	CP0028250023	BGC0001140|Resistance_gene|ACS13710.1	2.97e-35	127	target replacement	platensimycin/platencin
LT670843.1.region002	LT6708430016	BGC0001140|Resistance_gene|ACS13710.1	1.93e-36	130	target replacement	platensimycin/platencin
CP047028.1.region002	CP0470280025	BGC0001140|Resistance_gene|ACS13710.1	2.09e-38	136	target replacement	platensimycin/platencin
CP036313.1.region004	CP0363130057	BGC0001140|Resistance_gene|ACS13710.1	1.13e-40	142	target replacement	platensimycin/platencin
CP058561.1.region001	CP0585610052	BGC0001140|Resistance_gene|ACS13710.1	1.08e-37	134	target replacement	platensimycin/platencin
CP025791.1.region002	CP0257910016	BGC0001140|Resistance_gene|ACS13710.1	5.08e-38	135	target replacement	platensimycin/platencin
FO203522.1.region002	FO2035220021	BGC0001140|Resistance_gene|ACS13710.1	2.85e-32	119	target replacement	platensimycin/platencin
CP002377.1.region004	CP0023770002	ARO:3000379|OprM|AAG03816.1	1.01e-34	132	efflux pump	acridine dye;aminocoumarin antibiotic;aminoglycoside antibiotic;carbapenem;cephalosporin;cephamycin;diaminopyrimidine antibiotic;disinfecting agents and intercalating dyes;fluoroquinolone antibiotic;macrolide antibiotic;monobactam;penam;penem;peptide antibiotic;phenicol antibiotic;sulfonamide antibiotic;tetracycline antibiotic
CP032618.1.region006	CP0326180012	ARO:3000379|OprM|AAG03816.1	3.69e-33	128	efflux pump	acridine dye;aminocoumarin antibiotic;aminoglycoside antibiotic;carbapenem;cephalosporin;cephamycin;diaminopyrimidine antibiotic;disinfecting agents and intercalating dyes;fluoroquinolone antibiotic;macrolide antibiotic;monobactam;penam;penem;peptide antibiotic;phenicol antibiotic;sulfonamide antibiotic;tetracycline antibiotic
AP014545.1.region003	AP0145450001	ARO:3005067|ParS|AAG05187.1	1.5e-50	174	efflux pump	acridine dye;aminoglycoside antibiotic;carbapenem;cephalosporin;cephamycin;disinfecting agents and intercalating dyes;fluoroquinolone antibiotic;macrolide antibiotic;monobactam;penam;penem;phenicol antibiotic;tetracycline antibiotic
AP021846.1.region001	AP0218460038	ARO:3005067|ParS|AAG05187.1	7.12e-41	148	efflux pump	acridine dye;aminoglycoside antibiotic;carbapenem;cephalosporin;cephamycin;disinfecting agents and intercalating dyes;fluoroquinolone antibiotic;macrolide antibiotic;monobactam;penam;penem;phenicol antibiotic;tetracycline antibiotic
AP023240.1.region004	AP0232400001	ARO:3005067|ParS|AAG05187.1	8.65e-66	214	efflux pump	acridine dye;aminoglycoside antibiotic;carbapenem;cephalosporin;cephamycin;disinfecting agents and intercalating dyes;fluoroquinolone antibiotic;macrolide antibiotic;monobactam;penam;penem;phenicol antibiotic;tetracycline antibiotic
AP024154.1.region002	AP0241540015	ARO:3005068|ParR|AAG05188.1	9.62e-31	110	efflux pump	acridine dye;aminoglycoside antibiotic;carbapenem;cephalosporin;cephamycin;disinfecting agents and intercalating dyes;fluoroquinolone antibiotic;macrolide antibiotic;monobactam;penam;penem;phenicol antibiotic;tetracycline antibiotic
CP000155.1.region012	CP0001550026	ARO:3005067|ParS|AAG05187.1	2.52e-57	194	efflux pump	acridine dye;aminoglycoside antibiotic;carbapenem;cephalosporin;cephamycin;disinfecting agents and intercalating dyes;fluoroquinolone antibiotic;macrolide antibiotic;monobactam;penam;penem;phenicol antibiotic;tetracycline antibiotic
CP009264.2.region002	CP0092640002	ARO:3005067|ParS|AAG05187.1	1.86e-51	176	efflux pump	acridine dye;aminoglycoside antibiotic;carbapenem;cephalosporin;cephamycin;disinfecting agents and intercalating dyes;fluoroquinolone antibiotic;macrolide antibiotic;monobactam;penam;penem;phenicol antibiotic;tetracycline antibiotic
CP009617.1.region004	CP0096170035	ARO:3005067|ParS|AAG05187.1	3.91e-51	175	efflux pump	acridine dye;aminoglycoside antibiotic;carbapenem;cephalosporin;cephamycin;disinfecting agents and intercalating dyes;fluoroquinolone antibiotic;macrolide antibiotic;monobactam;penam;penem;phenicol antibiotic;tetracycline antibiotic
CP010859.1.region001	CP0108590035	ARO:3005067|ParS|AAG05187.1	5.31e-32	124	efflux pump	acridine dye;aminoglycoside antibiotic;carbapenem;cephalosporin;cephamycin;disinfecting agents and intercalating dyes;fluoroquinolone antibiotic;macrolide antibiotic;monobactam;penam;penem;phenicol antibiotic;tetracycline antibiotic
CP013021.1.region006	CP0130210038	ARO:3005067|ParS|AAG05187.1	9.11e-55	187	efflux pump	acridine dye;aminoglycoside antibiotic;carbapenem;cephalosporin;cephamycin;disinfecting agents and intercalating dyes;fluoroquinolone antibiotic;macrolide antibiotic;monobactam;penam;penem;phenicol antibiotic;tetracycline antibiotic
CP014796.1.region002	CP0147960017	ARO:3005068|ParR|AAG05188.1	2.69e-31	112	efflux pump	acridine dye;aminoglycoside antibiotic;carbapenem;cephalosporin;cephamycin;disinfecting agents and intercalating dyes;fluoroquinolone antibiotic;macrolide antibiotic;monobactam;penam;penem;phenicol antibiotic;tetracycline antibiotic
CP016556.1.region001	CP0165560002	ARO:3005067|ParS|AAG05187.1	4.99e-50	172	efflux pump	acridine dye;aminoglycoside antibiotic;carbapenem;cephalosporin;cephamycin;disinfecting agents and intercalating dyes;fluoroquinolone antibiotic;macrolide antibiotic;monobactam;penam;penem;phenicol antibiotic;tetracycline antibiotic
CP020453.1.region004	CP0204530034	ARO:3005067|ParS|AAG05187.1	1.58e-52	179	efflux pump	acridine dye;aminoglycoside antibiotic;carbapenem;cephalosporin;cephamycin;disinfecting agents and intercalating dyes;fluoroquinolone antibiotic;macrolide antibiotic;monobactam;penam;penem;phenicol antibiotic;tetracycline antibiotic
CP021425.1.region005	CP0214250011	ARO:3005067|ParS|AAG05187.1	4.27e-60	200	efflux pump	acridine dye;aminoglycoside antibiotic;carbapenem;cephalosporin;cephamycin;disinfecting agents and intercalating dyes;fluoroquinolone antibiotic;macrolide antibiotic;monobactam;penam;penem;phenicol antibiotic;tetracycline antibiotic
CP029043.1.region007	CP0290430031	ARO:3005068|ParR|AAG05188.1	2.96e-33	117	efflux pump	acridine dye;aminoglycoside antibiotic;carbapenem;cephalosporin;cephamycin;disinfecting agents and intercalating dyes;fluoroquinolone antibiotic;macrolide antibiotic;monobactam;penam;penem;phenicol antibiotic;tetracycline antibiotic
CP031472.1.region002	CP0314720035	ARO:3005067|ParS|AAG05187.1	1.75e-52	179	efflux pump	acridine dye;aminoglycoside antibiotic;carbapenem;cephalosporin;cephamycin;disinfecting agents and intercalating dyes;fluoroquinolone antibiotic;macrolide antibiotic;monobactam;penam;penem;phenicol antibiotic;tetracycline antibiotic
CP034759.1.region003	CP0347590063	ARO:3005067|ParS|AAG05187.1	6.51e-47	164	efflux pump	acridine dye;aminoglycoside antibiotic;carbapenem;cephalosporin;cephamycin;disinfecting agents and intercalating dyes;fluoroquinolone antibiotic;macrolide antibiotic;monobactam;penam;penem;phenicol antibiotic;tetracycline antibiotic
CP034834.1.region005	CP0348340003	ARO:3005067|ParS|AAG05187.1	9.35e-33	125	efflux pump	acridine dye;aminoglycoside antibiotic;carbapenem;cephalosporin;cephamycin;disinfecting agents and intercalating dyes;fluoroquinolone antibiotic;macrolide antibiotic;monobactam;penam;penem;phenicol antibiotic;tetracycline antibiotic
CP034836.1.region012	CP0348360027	ARO:3005067|ParS|AAG05187.1	4.84e-59	199	efflux pump	acridine dye;aminoglycoside antibiotic;carbapenem;cephalosporin;cephamycin;disinfecting agents and intercalating dyes;fluoroquinolone antibiotic;macrolide antibiotic;monobactam;penam;penem;phenicol antibiotic;tetracycline antibiotic
CP035490.1.region014	CP0354900027	ARO:3005067|ParS|AAG05187.1	4.84e-59	199	efflux pump	acridine dye;aminoglycoside antibiotic;carbapenem;cephalosporin;cephamycin;disinfecting agents and intercalating dyes;fluoroquinolone antibiotic;macrolide antibiotic;monobactam;penam;penem;phenicol antibiotic;tetracycline antibiotic
CP039928.1.region003	CP0399280041	ARO:3005067|ParS|AAG05187.1	1.62e-46	164	efflux pump	acridine dye;aminoglycoside antibiotic;carbapenem;cephalosporin;cephamycin;disinfecting agents and intercalating dyes;fluoroquinolone antibiotic;macrolide antibiotic;monobactam;penam;penem;phenicol antibiotic;tetracycline antibiotic
CP040656.1.region009	CP0406560044	ARO:3005067|ParS|AAG05187.1	3.11e-34	129	efflux pump	acridine dye;aminoglycoside antibiotic;carbapenem;cephalosporin;cephamycin;disinfecting agents and intercalating dyes;fluoroquinolone antibiotic;macrolide antibiotic;monobactam;penam;penem;phenicol antibiotic;tetracycline antibiotic
CP041244.1.region013	CP0412440030	ARO:3005067|ParS|AAG05187.1	1.33e-31	122	efflux pump	acridine dye;aminoglycoside antibiotic;carbapenem;cephalosporin;cephamycin;disinfecting agents and intercalating dyes;fluoroquinolone antibiotic;macrolide antibiotic;monobactam;penam;penem;phenicol antibiotic;tetracycline antibiotic
CP045355.1.region004	CP0453550036	ARO:3005067|ParS|AAG05187.1	9.28e-52	177	efflux pump	acridine dye;aminoglycoside antibiotic;carbapenem;cephalosporin;cephamycin;disinfecting agents and intercalating dyes;fluoroquinolone antibiotic;macrolide antibiotic;monobactam;penam;penem;phenicol antibiotic;tetracycline antibiotic
CP046065.1.region004	CP0460650036	ARO:3005067|ParS|AAG05187.1	9.28e-52	177	efflux pump	acridine dye;aminoglycoside antibiotic;carbapenem;cephalosporin;cephamycin;disinfecting agents and intercalating dyes;fluoroquinolone antibiotic;macrolide antibiotic;monobactam;penam;penem;phenicol antibiotic;tetracycline antibiotic
CP046162.1.region004	CP0461620036	ARO:3005067|ParS|AAG05187.1	9.28e-52	177	efflux pump	acridine dye;aminoglycoside antibiotic;carbapenem;cephalosporin;cephamycin;disinfecting agents and intercalating dyes;fluoroquinolone antibiotic;macrolide antibiotic;monobactam;penam;penem;phenicol antibiotic;tetracycline antibiotic
CP051461.1.region004	CP0514610019	ARO:3005068|ParR|AAG05188.1	4.22e-31	111	efflux pump	acridine dye;aminoglycoside antibiotic;carbapenem;cephalosporin;cephamycin;disinfecting agents and intercalating dyes;fluoroquinolone antibiotic;macrolide antibiotic;monobactam;penam;penem;phenicol antibiotic;tetracycline antibiotic
CP024087.1.region001	CP0240870002	ARO:3000815|mgrA|BAB41874.1	7.27e-34	113	efflux pump	acridine dye;cephalosporin;disinfecting agents and intercalating dyes;fluoroquinolone antibiotic;penam;peptide antibiotic;tetracycline antibiotic
CP031263.1.region020	CP0312630019	ARO:3000815|mgrA|BAB41874.1	6.88e-34	113	efflux pump	acridine dye;cephalosporin;disinfecting agents and intercalating dyes;fluoroquinolone antibiotic;penam;peptide antibiotic;tetracycline antibiotic
CP019650.1.region002	CP0196500008	ARO:3005010|qacEdelta1|AAC44316.1	5.73e-35	113	efflux pump	acridine dye;disinfecting agents and intercalating dyes
AP008957.1.region005	AP0089570029	ARO:3000839|arlS|ABD30512.1	3.83e-38	142	efflux pump	acridine dye;disinfecting agents and intercalating dyes;fluoroquinolone antibiotic
AP024235.1.region002	AP0242350008	ARO:3003835|cdeA|CAE00499.1	2.32e-43	155	efflux pump	acridine dye;disinfecting agents and intercalating dyes;fluoroquinolone antibiotic
AP024236.1.region002	AP0242360008	ARO:3003835|cdeA|CAE00499.1	2.32e-43	155	efflux pump	acridine dye;disinfecting agents and intercalating dyes;fluoroquinolone antibiotic
BX950229.1.region001	BX9502290027	ARO:3003835|cdeA|CAE00499.1	5.5e-38	140	efflux pump	acridine dye;disinfecting agents and intercalating dyes;fluoroquinolone antibiotic
CP000021.2.region002	CP0000210002	ARO:3003835|cdeA|CAE00499.1	7.41e-48	167	efflux pump	acridine dye;disinfecting agents and intercalating dyes;fluoroquinolone antibiotic
CP000362.1.region002	CP0003620011	ARO:3000838|arlR|ATC67679.1	9.39e-37	125	efflux pump	acridine dye;disinfecting agents and intercalating dyes;fluoroquinolone antibiotic
CP000514.1.region005	CP0005140004	ARO:3003835|cdeA|CAE00499.1	1.51e-54	185	efflux pump	acridine dye;disinfecting agents and intercalating dyes;fluoroquinolone antibiotic
CP000830.1.region002	CP0008300010	ARO:3000838|arlR|ATC67679.1	7.37e-35	120	efflux pump	acridine dye;disinfecting agents and intercalating dyes;fluoroquinolone antibiotic
CP001133.1.region002	CP0011330002	ARO:3003835|cdeA|CAE00499.1	8.75e-50	172	efflux pump	acridine dye;disinfecting agents and intercalating dyes;fluoroquinolone antibiotic
CP002117.1.region002	CP0021170018	ARO:3003835|cdeA|CAE00499.1	4.66e-35	132	efflux pump	acridine dye;disinfecting agents and intercalating dyes;fluoroquinolone antibiotic
CP002471.1.region002	CP0024710005	ARO:3003835|cdeA|CAE00499.1	5.37e-40	146	efflux pump	acridine dye;disinfecting agents and intercalating dyes;fluoroquinolone antibiotic
CP002623.1.region008	CP0026230009	ARO:3000838|arlR|ATC67679.1	5.75e-37	126	efflux pump	acridine dye;disinfecting agents and intercalating dyes;fluoroquinolone antibiotic
CP002913.1.region001	CP0029130028	ARO:3003835|cdeA|CAE00499.1	2.23e-38	142	efflux pump	acridine dye;disinfecting agents and intercalating dyes;fluoroquinolone antibiotic
CP003841.1.region001	CP0038410004	ARO:3003835|cdeA|CAE00499.1	2.45e-39	144	efflux pump	acridine dye;disinfecting agents and intercalating dyes;fluoroquinolone antibiotic
CP003844.1.region001	CP0038440004	ARO:3003835|cdeA|CAE00499.1	2.55e-39	144	efflux pump	acridine dye;disinfecting agents and intercalating dyes;fluoroquinolone antibiotic
CP005973.1.region001	CP0059730043	ARO:3003835|cdeA|CAE00499.1	8.14e-35	131	efflux pump	acridine dye;disinfecting agents and intercalating dyes;fluoroquinolone antibiotic
CP007220.1.region014	CP0072200033	ARO:3000839|arlS|ABD30512.1	4.18e-34	132	efflux pump	acridine dye;disinfecting agents and intercalating dyes;fluoroquinolone antibiotic
CP010797.1.region008	CP0107970032	ARO:3000839|arlS|ABD30512.1	8.61e-40	146	efflux pump	acridine dye;disinfecting agents and intercalating dyes;fluoroquinolone antibiotic
CP012749.1.region008	CP0127490028	ARO:3000839|arlS|ABD30512.1	7.7e-38	140	efflux pump	acridine dye;disinfecting agents and intercalating dyes;fluoroquinolone antibiotic
CP013120.1.region002	CP0131200007	ARO:3003835|cdeA|CAE00499.1	3.34e-55	187	efflux pump	acridine dye;disinfecting agents and intercalating dyes;fluoroquinolone antibiotic
CP013661.2.region001	CP0136610001	ARO:3003006|blt|AAC36944.1	5.08e-39	141	efflux pump	acridine dye;disinfecting agents and intercalating dyes;fluoroquinolone antibiotic
CP014782.1.region001	CP0147820004	ARO:3003835|cdeA|CAE00499.1	1.59e-45	161	efflux pump	acridine dye;disinfecting agents and intercalating dyes;fluoroquinolone antibiotic
CP015345.1.region003	CP0153450007	ARO:3003835|cdeA|CAE00499.1	3.34e-55	187	efflux pump	acridine dye;disinfecting agents and intercalating dyes;fluoroquinolone antibiotic
CP015346.1.region002	CP0153460004	ARO:3003835|cdeA|CAE00499.1	1.48e-55	188	efflux pump	acridine dye;disinfecting agents and intercalating dyes;fluoroquinolone antibiotic
CP016538.2.region001	CP0165380019	ARO:3003006|blt|AAC36944.1	1.32e-37	137	efflux pump	acridine dye;disinfecting agents and intercalating dyes;fluoroquinolone antibiotic
CP016543.2.region001	CP0165430018	ARO:3003006|blt|AAC36944.1	3.57e-36	133	efflux pump	acridine dye;disinfecting agents and intercalating dyes;fluoroquinolone antibiotic
CP017708.1.region039	CP0177080013	ARO:3000839|arlS|ABD30512.1	5.47e-51	176	efflux pump	acridine dye;disinfecting agents and intercalating dyes;fluoroquinolone antibiotic
CP018024.1.region001	CP0180240003	ARO:3003835|cdeA|CAE00499.1	2.43e-37	139	efflux pump	acridine dye;disinfecting agents and intercalating dyes;fluoroquinolone antibiotic
CP018026.1.region001	CP0180260003	ARO:3003835|cdeA|CAE00499.1	4.22e-37	138	efflux pump	acridine dye;disinfecting agents and intercalating dyes;fluoroquinolone antibiotic
CP018027.1.region001	CP0180270003	ARO:3003835|cdeA|CAE00499.1	4.22e-37	138	efflux pump	acridine dye;disinfecting agents and intercalating dyes;fluoroquinolone antibiotic
CP018029.1.region001	CP0180290003	ARO:3003835|cdeA|CAE00499.1	7.3e-37	138	efflux pump	acridine dye;disinfecting agents and intercalating dyes;fluoroquinolone antibiotic
CP018171.1.region004	CP0181710001	ARO:3000839|arlS|ABD30512.1	9.56e-34	128	efflux pump	acridine dye;disinfecting agents and intercalating dyes;fluoroquinolone antibiotic
CP021425.1.region002	CP0214250001	ARO:3003835|cdeA|CAE00499.1	2.15e-45	160	efflux pump	acridine dye;disinfecting agents and intercalating dyes;fluoroquinolone antibiotic
CP023720.1.region015	CP0237200009	ARO:3000839|arlS|ABD30512.1	3.76e-38	142	efflux pump	acridine dye;disinfecting agents and intercalating dyes;fluoroquinolone antibiotic
CP025420.1.region002	CP0254200006	ARO:3003835|cdeA|CAE00499.1	5.88e-40	146	efflux pump	acridine dye;disinfecting agents and intercalating dyes;fluoroquinolone antibiotic
CP026604.1.region004	CP0266040007	ARO:3003835|cdeA|CAE00499.1	6.95e-49	170	efflux pump	acridine dye;disinfecting agents and intercalating dyes;fluoroquinolone antibiotic
CP026606.1.region001	CP0266060007	ARO:3003835|cdeA|CAE00499.1	2.64e-38	141	efflux pump	acridine dye;disinfecting agents and intercalating dyes;fluoroquinolone antibiotic
CP026923.1.region002	CP0269230002	ARO:3000839|arlS|ABD30512.1	1.25e-38	143	efflux pump	acridine dye;disinfecting agents and intercalating dyes;fluoroquinolone antibiotic
CP027407.1.region005	CP0274070012	ARO:3000838|arlR|ATC67679.1	9.94e-37	125	efflux pump	acridine dye;disinfecting agents and intercalating dyes;fluoroquinolone antibiotic
CP027432.2.region002	CP0274320006	ARO:3000838|arlR|ATC67679.1	2.55e-31	111	efflux pump	acridine dye;disinfecting agents and intercalating dyes;fluoroquinolone antibiotic
CP029064.1.region006	CP0290640003	ARO:3003835|cdeA|CAE00499.1	5.71e-53	181	efflux pump	acridine dye;disinfecting agents and intercalating dyes;fluoroquinolone antibiotic
CP031093.1.region006	CP0310930004	ARO:3003835|cdeA|CAE00499.1	2.74e-53	182	efflux pump	acridine dye;disinfecting agents and intercalating dyes;fluoroquinolone antibiotic
CP031947.1.region001	CP0319470019	ARO:3000838|arlR|ATC67679.1	1.13e-34	120	efflux pump	acridine dye;disinfecting agents and intercalating dyes;fluoroquinolone antibiotic
CP031967.1.region004	CP0319670008	ARO:3003835|cdeA|CAE00499.1	1.77e-39	144	efflux pump	acridine dye;disinfecting agents and intercalating dyes;fluoroquinolone antibiotic
CP033575.1.region006	CP0335750041	ARO:3003835|cdeA|CAE00499.1	4.67e-36	135	efflux pump	acridine dye;disinfecting agents and intercalating dyes;fluoroquinolone antibiotic
CP034241.1.region002	CP0342410007	ARO:3003835|cdeA|CAE00499.1	2.21e-31	116	efflux pump	acridine dye;disinfecting agents and intercalating dyes;fluoroquinolone antibiotic
CP037934.1.region004	CP0379340009	ARO:3003835|cdeA|CAE00499.1	1.26e-54	185	efflux pump	acridine dye;disinfecting agents and intercalating dyes;fluoroquinolone antibiotic
CP040263.1.region003	CP0402630037	ARO:3000839|arlS|ABD30512.1	5.62e-35	133	efflux pump	acridine dye;disinfecting agents and intercalating dyes;fluoroquinolone antibiotic
CP040269.1.region002	CP0402690039	ARO:3000839|arlS|ABD30512.1	3.14e-35	133	efflux pump	acridine dye;disinfecting agents and intercalating dyes;fluoroquinolone antibiotic
CP040747.1.region010	CP0407470002	ARO:3000839|arlS|ABD30512.1	2.07e-32	127	efflux pump	acridine dye;disinfecting agents and intercalating dyes;fluoroquinolone antibiotic
CP041169.1.region001	CP0411690004	ARO:3003835|cdeA|CAE00499.1	1.66e-38	142	efflux pump	acridine dye;disinfecting agents and intercalating dyes;fluoroquinolone antibiotic
CP045324.1.region005	CP0453240004	ARO:3003835|cdeA|CAE00499.1	2.49e-51	177	efflux pump	acridine dye;disinfecting agents and intercalating dyes;fluoroquinolone antibiotic
CP045367.1.region005	CP0453670004	ARO:3003835|cdeA|CAE00499.1	2.49e-51	177	efflux pump	acridine dye;disinfecting agents and intercalating dyes;fluoroquinolone antibiotic
CP045393.1.region006	CP0453930011	ARO:3000838|arlR|ATC67679.1	5.32e-37	126	efflux pump	acridine dye;disinfecting agents and intercalating dyes;fluoroquinolone antibiotic
CP045404.1.region006	CP0454040016	ARO:3000838|arlR|ATC67679.1	5.64e-38	129	efflux pump	acridine dye;disinfecting agents and intercalating dyes;fluoroquinolone antibiotic
CP045410.1.region008	CP0454100016	ARO:3000838|arlR|ATC67679.1	3.21e-37	127	efflux pump	acridine dye;disinfecting agents and intercalating dyes;fluoroquinolone antibiotic
CP046670.1.region001	CP0466700004	ARO:3003835|cdeA|CAE00499.1	2.61e-37	139	efflux pump	acridine dye;disinfecting agents and intercalating dyes;fluoroquinolone antibiotic
CP054920.1.region011	CP0549200022	ARO:3000839|arlS|ABD30512.1	3.77e-38	142	efflux pump	acridine dye;disinfecting agents and intercalating dyes;fluoroquinolone antibiotic
CP058561.1.region005	CP0585610018	ARO:3003835|cdeA|CAE00499.1	4.35e-34	129	efflux pump	acridine dye;disinfecting agents and intercalating dyes;fluoroquinolone antibiotic
CP058561.1.region001	CP0585610067	ARO:3000839|arlS|ABD30512.1	5.32e-32	124	efflux pump	acridine dye;disinfecting agents and intercalating dyes;fluoroquinolone antibiotic
CP060397.1.region002	CP0603970038	ARO:3000839|arlS|ABD30512.1	3.91e-46	164	efflux pump	acridine dye;disinfecting agents and intercalating dyes;fluoroquinolone antibiotic
FM178380.1.region002	FM1783800007	ARO:3003835|cdeA|CAE00499.1	1.1e-49	172	efflux pump	acridine dye;disinfecting agents and intercalating dyes;fluoroquinolone antibiotic
FO203363.1.region006	FO2033630004	ARO:3003835|cdeA|CAE00499.1	2.19e-54	185	efflux pump	acridine dye;disinfecting agents and intercalating dyes;fluoroquinolone antibiotic
FO203512.1.region003	FO2035120007	ARO:3003835|cdeA|CAE00499.1	9.85e-54	183	efflux pump	acridine dye;disinfecting agents and intercalating dyes;fluoroquinolone antibiotic
FO203527.1.region001	FO2035270030	ARO:3003835|cdeA|CAE00499.1	3.7e-35	132	efflux pump	acridine dye;disinfecting agents and intercalating dyes;fluoroquinolone antibiotic
LR136958.1.region003	LR1369580004	ARO:3003835|cdeA|CAE00499.1	4.73e-56	189	efflux pump	acridine dye;disinfecting agents and intercalating dyes;fluoroquinolone antibiotic
LT703003.1.region004	LT7030030004	ARO:3000838|arlR|ATC67679.1	1.97e-37	127	efflux pump	acridine dye;disinfecting agents and intercalating dyes;fluoroquinolone antibiotic
MSCJ01000001.1.region002	MSCJ010000010001	ARO:3003835|cdeA|CAE00499.1	8.36e-51	175	efflux pump	acridine dye;disinfecting agents and intercalating dyes;fluoroquinolone antibiotic
CP029554.1.region008	CP0295540008	ARO:3001214|mdtM|AAC77293.1	4.69e-89	273	efflux pump	acridine dye;disinfecting agents and intercalating dyes;fluoroquinolone antibiotic;lincosamide antibiotic;nucleoside antibiotic;phenicol antibiotic
CP003239.1.region003	CP0032390012	ARO:3003030|mexV|AAG07762.1	5.46e-31	118	efflux pump	acridine dye;disinfecting agents and intercalating dyes;fluoroquinolone antibiotic;macrolide antibiotic;phenicol antibiotic;tetracycline antibiotic
CP018297.1.region001	CP0182970016	ARO:3003030|mexV|AAG07762.1	7.15e-33	123	efflux pump	acridine dye;disinfecting agents and intercalating dyes;fluoroquinolone antibiotic;macrolide antibiotic;phenicol antibiotic;tetracycline antibiotic
CP029052.1.region006	CP0290520044	ARO:3003007|bmr|AAA22277.1	2.57e-110	317	efflux pump	acridine dye;disinfecting agents and intercalating dyes;fluoroquinolone antibiotic;nucleoside antibiotic;phenicol antibiotic
CP031223.1.region001	CP0312230007	ARO:3003007|bmr|AAA22277.1	4.6e-142	407	efflux pump	acridine dye;disinfecting agents and intercalating dyes;fluoroquinolone antibiotic;nucleoside antibiotic;phenicol antibiotic
CP041632.1.region002	CP0416320004	ARO:3003007|bmr|AAA22277.1	2.36e-44	155	efflux pump	acridine dye;disinfecting agents and intercalating dyes;fluoroquinolone antibiotic;nucleoside antibiotic;phenicol antibiotic
CP003239.1.region003	CP0032390001	ARO:3000807|mexH|AAG07593.1	1.43e-34	128	efflux pump	acridine dye;disinfecting agents and intercalating dyes;fluoroquinolone antibiotic;tetracycline antibiotic
CP014782.1.region005	CP0147820008	ARO:3000807|mexH|AAG07593.1	1.14e-42	151	efflux pump	acridine dye;disinfecting agents and intercalating dyes;fluoroquinolone antibiotic;tetracycline antibiotic
CP022525.1.region005	CP0225250002	ARO:3000806|mexG|AAG07592.1	4.36e-104	291	efflux pump	acridine dye;disinfecting agents and intercalating dyes;fluoroquinolone antibiotic;tetracycline antibiotic
CP022525.1.region005	CP0225250003	ARO:3000807|mexH|AAG07593.1	0	729	efflux pump	acridine dye;disinfecting agents and intercalating dyes;fluoroquinolone antibiotic;tetracycline antibiotic
CP022526.1.region007	CP0225260046	ARO:3000807|mexH|AAG07593.1	0	729	efflux pump	acridine dye;disinfecting agents and intercalating dyes;fluoroquinolone antibiotic;tetracycline antibiotic
CP022526.1.region007	CP0225260047	ARO:3000806|mexG|AAG07592.1	4.36e-104	291	efflux pump	acridine dye;disinfecting agents and intercalating dyes;fluoroquinolone antibiotic;tetracycline antibiotic
CP041614.1.region009	CP0416140012	ARO:3000807|mexH|AAG07593.1	2.32e-40	145	efflux pump	acridine dye;disinfecting agents and intercalating dyes;fluoroquinolone antibiotic;tetracycline antibiotic
CM002271.1.region007	CM0022710011	ARO:3004577|Acinetobacter|ACQ82816.1	8.48e-36	135	efflux pump	acridine dye;disinfecting agents and intercalating dyes;macrolide antibiotic
CM002273.1.region007	CM0022730010	ARO:3004577|Acinetobacter|ACQ82816.1	8.48e-36	135	efflux pump	acridine dye;disinfecting agents and intercalating dyes;macrolide antibiotic
CP000302.1.region002	CP0003020012	ARO:3004577|Acinetobacter|ACQ82816.1	8.3e-37	138	efflux pump	acridine dye;disinfecting agents and intercalating dyes;macrolide antibiotic
CP007220.1.region002	CP0072200008	ARO:3004577|Acinetobacter|ACQ82816.1	6.87e-33	127	efflux pump	acridine dye;disinfecting agents and intercalating dyes;macrolide antibiotic
CP015163.1.region004	CP0151630014	ARO:3004577|Acinetobacter|ACQ82816.1	7.99e-32	124	efflux pump	acridine dye;disinfecting agents and intercalating dyes;macrolide antibiotic
CP015163.1.region027	CP0151630069	ARO:3004577|Acinetobacter|ACQ82816.1	4.13e-33	128	efflux pump	acridine dye;disinfecting agents and intercalating dyes;macrolide antibiotic
CP029188.1.region016	CP0291880021	ARO:3004577|Acinetobacter|ACQ82816.1	1.23e-35	135	efflux pump	acridine dye;disinfecting agents and intercalating dyes;macrolide antibiotic
CP031969.1.region027	CP0319690026	ARO:3004577|Acinetobacter|ACQ82816.1	5.54e-33	128	efflux pump	acridine dye;disinfecting agents and intercalating dyes;macrolide antibiotic
CP033581.1.region026	CP0335810005	ARO:3004577|Acinetobacter|ACQ82816.1	4.32e-38	142	efflux pump	acridine dye;disinfecting agents and intercalating dyes;macrolide antibiotic
CT971583.1.region003	CT9715830001	ARO:3004577|Acinetobacter|ACQ82816.1	3.62e-31	123	efflux pump	acridine dye;disinfecting agents and intercalating dyes;macrolide antibiotic
AP012273.1.region002	AP0122730008	ARO:3003548|mdtN|BAE78084.1	3.81e-35	129	efflux pump	acridine dye;disinfecting agents and intercalating dyes;nucleoside antibiotic
CP022525.1.region007	CP0225250034	ARO:3003548|mdtN|BAE78084.1	8.66e-38	134	efflux pump	acridine dye;disinfecting agents and intercalating dyes;nucleoside antibiotic
CP022525.1.region013	CP0225250046	ARO:3003548|mdtN|BAE78084.1	8.11e-38	135	efflux pump	acridine dye;disinfecting agents and intercalating dyes;nucleoside antibiotic
CP022526.1.region010	CP0225260034	ARO:3003548|mdtN|BAE78084.1	8.66e-38	134	efflux pump	acridine dye;disinfecting agents and intercalating dyes;nucleoside antibiotic
CP022526.1.region002	CP0225260046	ARO:3003548|mdtN|BAE78084.1	8.11e-38	135	efflux pump	acridine dye;disinfecting agents and intercalating dyes;nucleoside antibiotic
AP019701.1.region003	AP0197010019	ARO:3002522|novA|AAF67494.2	8.54e-33	130	efflux pump	aminocoumarin antibiotic
CP001614.2.region011	CP0016140007	ARO:3000793|mdtB|AAC75136.1	1.58e-35	143	efflux pump	aminocoumarin antibiotic
CP001614.2.region006	CP0016140012	ARO:3000793|mdtB|AAC75136.1	6.78e-39	154	efflux pump	aminocoumarin antibiotic
CP002830.1.region014	CP0028300031	ARO:3000793|mdtB|AAC75136.1	7.62e-58	213	efflux pump	aminocoumarin antibiotic
CP003221.1.region003	CP0032210027	ARO:3000792|mdtA|AAC75135.2	2.19e-31	121	efflux pump	aminocoumarin antibiotic
CP006701.1.region001	CP0067010025	ARO:3002522|novA|AAF67494.2	1.38e-35	138	efflux pump	aminocoumarin antibiotic
CP006773.1.region008	CP0067730004	ARO:3002522|novA|AAF67494.2	4.4e-33	130	efflux pump	aminocoumarin antibiotic
CP010085.1.region002	CP0100850024	ARO:3002522|novA|AAF67494.2	9.73e-32	126	efflux pump	aminocoumarin antibiotic
CP010748.1.region001	CP0107480026	ARO:3002522|novA|AAF67494.2	6.66e-32	127	efflux pump	aminocoumarin antibiotic
CP011463.1.region002	CP0114630024	ARO:3002522|novA|AAF67494.2	9.73e-32	126	efflux pump	aminocoumarin antibiotic
CP011473.1.region001	CP0114730024	ARO:3002522|novA|AAF67494.2	9.73e-32	126	efflux pump	aminocoumarin antibiotic
CP014782.1.region003	CP0147820023	ARO:3002522|novA|AAF67494.2	3.85e-31	124	efflux pump	aminocoumarin antibiotic
CP015163.1.region023	CP0151630047	ARO:3002522|novA|AAF67494.2	9.86e-34	132	efflux pump	aminocoumarin antibiotic
CP016253.1.region001	CP0162530015	ARO:3002522|novA|AAF67494.2	1.38e-35	138	efflux pump	aminocoumarin antibiotic
CP016254.1.region001	CP0162540015	ARO:3002522|novA|AAF67494.2	1.38e-35	138	efflux pump	aminocoumarin antibiotic
CP016255.1.region001	CP0162550015	ARO:3002522|novA|AAF67494.2	1.38e-35	138	efflux pump	aminocoumarin antibiotic
CP016256.1.region001	CP0162560016	ARO:3002522|novA|AAF67494.2	1.38e-35	138	efflux pump	aminocoumarin antibiotic
CP016257.1.region001	CP0162570015	ARO:3002522|novA|AAF67494.2	1.38e-35	138	efflux pump	aminocoumarin antibiotic
CP016258.1.region001	CP0162580015	ARO:3002522|novA|AAF67494.2	1.38e-35	138	efflux pump	aminocoumarin antibiotic
CP016259.1.region001	CP0162590015	ARO:3002522|novA|AAF67494.2	1.38e-35	138	efflux pump	aminocoumarin antibiotic
CP016260.1.region001	CP0162600015	ARO:3002522|novA|AAF67494.2	1.38e-35	138	efflux pump	aminocoumarin antibiotic
CP016261.1.region001	CP0162610016	ARO:3002522|novA|AAF67494.2	1.38e-35	138	efflux pump	aminocoumarin antibiotic
CP016262.1.region001	CP0162620015	ARO:3002522|novA|AAF67494.2	1.38e-35	138	efflux pump	aminocoumarin antibiotic
CP016264.1.region001	CP0162640015	ARO:3002522|novA|AAF67494.2	1.38e-35	138	efflux pump	aminocoumarin antibiotic
CP016265.1.region001	CP0162650016	ARO:3002522|novA|AAF67494.2	1.38e-35	138	efflux pump	aminocoumarin antibiotic
CP017014.1.region010	CP0170140026	ARO:3002522|novA|AAF67494.2	3.71e-32	127	efflux pump	aminocoumarin antibiotic
CP020532.1.region001	CP0205320009	ARO:3002522|novA|AAF67494.2	1.38e-35	138	efflux pump	aminocoumarin antibiotic
CP022100.1.region002	CP0221000024	ARO:3002522|novA|AAF67494.2	9.73e-32	126	efflux pump	aminocoumarin antibiotic
CP022104.1.region002	CP0221040024	ARO:3002522|novA|AAF67494.2	6.25e-32	127	efflux pump	aminocoumarin antibiotic
CP023055.1.region002	CP0230550024	ARO:3002522|novA|AAF67494.2	9.73e-32	126	efflux pump	aminocoumarin antibiotic
CP023210.1.region001	CP0232100026	ARO:3002522|novA|AAF67494.2	1.38e-35	138	efflux pump	aminocoumarin antibiotic
CP023311.1.region003	CP0233110024	ARO:3002522|novA|AAF67494.2	9.73e-32	126	efflux pump	aminocoumarin antibiotic
CP031759.1.region007	CP0317590068	ARO:3000793|mdtB|AAC75136.1	4.87e-31	123	efflux pump	aminocoumarin antibiotic
CP034759.1.region003	CP0347590009	ARO:3000794|mdtC|AAC75137.1	4.27e-47	180	efflux pump	aminocoumarin antibiotic
CP036292.1.region010	CP0362920012	ARO:3000794|mdtC|AAC75137.1	1.22e-35	143	efflux pump	aminocoumarin antibiotic
CP036422.1.region003	CP0364220004	ARO:3002522|novA|AAF67494.2	2.72e-47	174	efflux pump	aminocoumarin antibiotic
CP040749.1.region001	CP0407490026	ARO:3002522|novA|AAF67494.2	5.57e-32	127	efflux pump	aminocoumarin antibiotic
CP041614.1.region007	CP0416140023	ARO:3002522|novA|AAF67494.2	1.89e-32	128	efflux pump	aminocoumarin antibiotic
CP044407.1.region008	CP0444070013	ARO:3002522|novA|AAF67494.2	3.07e-31	125	efflux pump	aminocoumarin antibiotic
CP045929.1.region008	CP0459290013	ARO:3002522|novA|AAF67494.2	6.44e-34	133	efflux pump	aminocoumarin antibiotic
CP054932.1.region015	CP0549320010	ARO:3002522|novA|AAF67494.2	2.04e-39	149	efflux pump	aminocoumarin antibiotic
CP058561.1.region001	CP0585610015	ARO:3002522|novA|AAF67494.2	1e-31	126	efflux pump	aminocoumarin antibiotic
CP062005.1.region002	CP0620050001	ARO:3000792|mdtA|AAC75135.2	1.96e-34	128	efflux pump	aminocoumarin antibiotic
CR354531.1.region003	CR3545310012	ARO:3002522|novA|AAF67494.2	5.24e-34	133	efflux pump	aminocoumarin antibiotic
LK021128.1.region001	LK0211280025	ARO:3002522|novA|AAF67494.2	1.38e-35	138	efflux pump	aminocoumarin antibiotic
AP021874.1.region005	AP0218740023	ARO:3000829|baeS|BAA15934.1	2.87e-32	125	efflux pump	aminocoumarin antibiotic;aminoglycoside antibiotic
AP021875.1.region006	AP0218750010	ARO:3000829|baeS|BAA15934.1	2.31e-32	125	efflux pump	aminocoumarin antibiotic;aminoglycoside antibiotic
CP014796.1.region002	CP0147960018	ARO:3000829|baeS|BAA15934.1	2.92e-31	123	efflux pump	aminocoumarin antibiotic;aminoglycoside antibiotic
CP017965.1.region015	CP0179650035	ARO:3000829|baeS|BAA15934.1	1.54e-32	124	efflux pump	aminocoumarin antibiotic;aminoglycoside antibiotic
CP018171.1.region002	CP0181710005	ARO:3000830|cpxA|BAB38260.1	6.91e-38	140	efflux pump	aminocoumarin antibiotic;aminoglycoside antibiotic
CP020038.1.region010	CP0200380013	ARO:3000828|baeR|BAA15935.1	1.12e-34	121	efflux pump	aminocoumarin antibiotic;aminoglycoside antibiotic
CP021425.1.region015	CP0214250022	ARO:3000830|cpxA|BAB38260.1	5.48e-35	132	efflux pump	aminocoumarin antibiotic;aminoglycoside antibiotic
CP025408.1.region007	CP0254080076	ARO:3000829|baeS|BAA15934.1	3.33e-34	129	efflux pump	aminocoumarin antibiotic;aminoglycoside antibiotic
CP040676.1.region001	CP0406760015	ARO:3000829|baeS|BAA15934.1	8.63e-31	124	efflux pump	aminocoumarin antibiotic;aminoglycoside antibiotic
CP041186.1.region006	CP0411860012	ARO:3000829|baeS|BAA15934.1	1.94e-31	124	efflux pump	aminocoumarin antibiotic;aminoglycoside antibiotic
CP042301.2.region004	CP0423010005	ARO:3000830|cpxA|BAB38260.1	1.17e-39	145	efflux pump	aminocoumarin antibiotic;aminoglycoside antibiotic
CP042301.2.region001	CP0423010016	ARO:3000829|baeS|BAA15934.1	1.21e-31	122	efflux pump	aminocoumarin antibiotic;aminoglycoside antibiotic
CP043830.1.region003	CP0438300001	ARO:3000829|baeS|BAA15934.1	6.56e-33	127	efflux pump	aminocoumarin antibiotic;aminoglycoside antibiotic
CP045119.1.region004	CP0451190033	ARO:3000829|baeS|BAA15934.1	2.18e-33	128	efflux pump	aminocoumarin antibiotic;aminoglycoside antibiotic
CP054916.1.region036	CP0549160001	ARO:3000829|baeS|BAA15934.1	7.94e-34	130	efflux pump	aminocoumarin antibiotic;aminoglycoside antibiotic
CP054920.1.region022	CP0549200022	ARO:3000829|baeS|BAA15934.1	1.34e-32	127	efflux pump	aminocoumarin antibiotic;aminoglycoside antibiotic
CP054929.1.region004	CP0549290044	ARO:3000829|baeS|BAA15934.1	9.84e-34	130	efflux pump	aminocoumarin antibiotic;aminoglycoside antibiotic
FO538765.1.region003	FO5387650003	ARO:3000829|baeS|BAA15934.1	8.67e-33	124	efflux pump	aminocoumarin antibiotic;aminoglycoside antibiotic
AP019701.1.region001	AP0197010021	ARO:3000801|MexD|AAB41957.1	1.5e-32	133	efflux pump	aminocoumarin antibiotic;aminoglycoside antibiotic;cephalosporin;diaminopyrimidine antibiotic;fluoroquinolone antibiotic;macrolide antibiotic;penam;phenicol antibiotic;tetracycline antibiotic
AP021879.1.region003	AP0218790004	ARO:3000800|MexC|AAB41956.1	1.18e-59	195	efflux pump	aminocoumarin antibiotic;aminoglycoside antibiotic;cephalosporin;diaminopyrimidine antibiotic;fluoroquinolone antibiotic;macrolide antibiotic;penam;phenicol antibiotic;tetracycline antibiotic
AP021879.1.region003	AP0218790006	ARO:3000802|OprJ|AAB41958.1	1.21e-44	160	efflux pump	aminocoumarin antibiotic;aminoglycoside antibiotic;cephalosporin;diaminopyrimidine antibiotic;fluoroquinolone antibiotic;macrolide antibiotic;penam;phenicol antibiotic;tetracycline antibiotic
CP000821.1.region004	CP0008210026	ARO:3000802|OprJ|AAB41958.1	5.67e-31	122	efflux pump	aminocoumarin antibiotic;aminoglycoside antibiotic;cephalosporin;diaminopyrimidine antibiotic;fluoroquinolone antibiotic;macrolide antibiotic;penam;phenicol antibiotic;tetracycline antibiotic
CP000851.1.region004	CP0008510023	ARO:3000800|MexC|AAB41956.1	4.77e-58	191	efflux pump	aminocoumarin antibiotic;aminoglycoside antibiotic;cephalosporin;diaminopyrimidine antibiotic;fluoroquinolone antibiotic;macrolide antibiotic;penam;phenicol antibiotic;tetracycline antibiotic
CP000931.1.region005	CP0009310021	ARO:3000800|MexC|AAB41956.1	2.31e-56	186	efflux pump	aminocoumarin antibiotic;aminoglycoside antibiotic;cephalosporin;diaminopyrimidine antibiotic;fluoroquinolone antibiotic;macrolide antibiotic;penam;phenicol antibiotic;tetracycline antibiotic
CP009355.1.region002	CP0093550030	ARO:3000800|MexC|AAB41956.1	5.56e-40	142	efflux pump	aminocoumarin antibiotic;aminoglycoside antibiotic;cephalosporin;diaminopyrimidine antibiotic;fluoroquinolone antibiotic;macrolide antibiotic;penam;phenicol antibiotic;tetracycline antibiotic
CP017477.1.region002	CP0174770002	ARO:3000800|MexC|AAB41956.1	8.41e-35	129	efflux pump	aminocoumarin antibiotic;aminoglycoside antibiotic;cephalosporin;diaminopyrimidine antibiotic;fluoroquinolone antibiotic;macrolide antibiotic;penam;phenicol antibiotic;tetracycline antibiotic
CP018308.1.region003	CP0183080029	ARO:3000802|OprJ|AAB41958.1	1.04e-41	152	efflux pump	aminocoumarin antibiotic;aminoglycoside antibiotic;cephalosporin;diaminopyrimidine antibiotic;fluoroquinolone antibiotic;macrolide antibiotic;penam;phenicol antibiotic;tetracycline antibiotic
CP021112.1.region005	CP0211120003	ARO:3000800|MexC|AAB41956.1	9.69e-46	159	efflux pump	aminocoumarin antibiotic;aminoglycoside antibiotic;cephalosporin;diaminopyrimidine antibiotic;fluoroquinolone antibiotic;macrolide antibiotic;penam;phenicol antibiotic;tetracycline antibiotic
CP021112.1.region004	CP0211120037	ARO:3000800|MexC|AAB41956.1	9.11e-31	118	efflux pump	aminocoumarin antibiotic;aminoglycoside antibiotic;cephalosporin;diaminopyrimidine antibiotic;fluoroquinolone antibiotic;macrolide antibiotic;penam;phenicol antibiotic;tetracycline antibiotic
CP022525.1.region005	CP0225250005	ARO:3000802|OprJ|AAB41958.1	4.75e-40	147	efflux pump	aminocoumarin antibiotic;aminoglycoside antibiotic;cephalosporin;diaminopyrimidine antibiotic;fluoroquinolone antibiotic;macrolide antibiotic;penam;phenicol antibiotic;tetracycline antibiotic
CP022525.1.region013	CP0225250006	ARO:3000802|OprJ|AAB41958.1	1.38e-35	135	efflux pump	aminocoumarin antibiotic;aminoglycoside antibiotic;cephalosporin;diaminopyrimidine antibiotic;fluoroquinolone antibiotic;macrolide antibiotic;penam;phenicol antibiotic;tetracycline antibiotic
CP022526.1.region002	CP0225260006	ARO:3000802|OprJ|AAB41958.1	1.38e-35	135	efflux pump	aminocoumarin antibiotic;aminoglycoside antibiotic;cephalosporin;diaminopyrimidine antibiotic;fluoroquinolone antibiotic;macrolide antibiotic;penam;phenicol antibiotic;tetracycline antibiotic
CP022526.1.region007	CP0225260044	ARO:3000802|OprJ|AAB41958.1	4.75e-40	147	efflux pump	aminocoumarin antibiotic;aminoglycoside antibiotic;cephalosporin;diaminopyrimidine antibiotic;fluoroquinolone antibiotic;macrolide antibiotic;penam;phenicol antibiotic;tetracycline antibiotic
CP027796.1.region002	CP0277960032	ARO:3000802|OprJ|AAB41958.1	2.75e-81	257	efflux pump	aminocoumarin antibiotic;aminoglycoside antibiotic;cephalosporin;diaminopyrimidine antibiotic;fluoroquinolone antibiotic;macrolide antibiotic;penam;phenicol antibiotic;tetracycline antibiotic
CP027796.1.region002	CP0277960034	ARO:3000800|MexC|AAB41956.1	2.8e-82	253	efflux pump	aminocoumarin antibiotic;aminoglycoside antibiotic;cephalosporin;diaminopyrimidine antibiotic;fluoroquinolone antibiotic;macrolide antibiotic;penam;phenicol antibiotic;tetracycline antibiotic
CP027798.1.region003	CP0277980002	ARO:3000800|MexC|AAB41956.1	2.8e-82	253	efflux pump	aminocoumarin antibiotic;aminoglycoside antibiotic;cephalosporin;diaminopyrimidine antibiotic;fluoroquinolone antibiotic;macrolide antibiotic;penam;phenicol antibiotic;tetracycline antibiotic
CP027798.1.region003	CP0277980004	ARO:3000802|OprJ|AAB41958.1	2.75e-81	257	efflux pump	aminocoumarin antibiotic;aminoglycoside antibiotic;cephalosporin;diaminopyrimidine antibiotic;fluoroquinolone antibiotic;macrolide antibiotic;penam;phenicol antibiotic;tetracycline antibiotic
CP029495.1.region008	CP0294950023	ARO:3000800|MexC|AAB41956.1	1.61e-89	272	efflux pump	aminocoumarin antibiotic;aminoglycoside antibiotic;cephalosporin;diaminopyrimidine antibiotic;fluoroquinolone antibiotic;macrolide antibiotic;penam;phenicol antibiotic;tetracycline antibiotic
CP029495.1.region008	CP0294950025	ARO:3000802|OprJ|AAB41958.1	1.14e-77	247	efflux pump	aminocoumarin antibiotic;aminoglycoside antibiotic;cephalosporin;diaminopyrimidine antibiotic;fluoroquinolone antibiotic;macrolide antibiotic;penam;phenicol antibiotic;tetracycline antibiotic
CP029554.1.region001	CP0295540028	ARO:3000800|MexC|AAB41956.1	1.61e-89	272	efflux pump	aminocoumarin antibiotic;aminoglycoside antibiotic;cephalosporin;diaminopyrimidine antibiotic;fluoroquinolone antibiotic;macrolide antibiotic;penam;phenicol antibiotic;tetracycline antibiotic
CP029843.1.region008	CP0298430030	ARO:3000800|MexC|AAB41956.1	5.86e-37	134	efflux pump	aminocoumarin antibiotic;aminoglycoside antibiotic;cephalosporin;diaminopyrimidine antibiotic;fluoroquinolone antibiotic;macrolide antibiotic;penam;phenicol antibiotic;tetracycline antibiotic
CP029843.1.region008	CP0298430035	ARO:3000800|MexC|AAB41956.1	2.7e-79	247	efflux pump	aminocoumarin antibiotic;aminoglycoside antibiotic;cephalosporin;diaminopyrimidine antibiotic;fluoroquinolone antibiotic;macrolide antibiotic;penam;phenicol antibiotic;tetracycline antibiotic
CP030092.1.region005	CP0300920022	ARO:3000800|MexC|AAB41956.1	2.08e-80	249	efflux pump	aminocoumarin antibiotic;aminoglycoside antibiotic;cephalosporin;diaminopyrimidine antibiotic;fluoroquinolone antibiotic;macrolide antibiotic;penam;phenicol antibiotic;tetracycline antibiotic
CP031146.1.region002	CP0311460010	ARO:3000802|OprJ|AAB41958.1	3.26e-44	159	efflux pump	aminocoumarin antibiotic;aminoglycoside antibiotic;cephalosporin;diaminopyrimidine antibiotic;fluoroquinolone antibiotic;macrolide antibiotic;penam;phenicol antibiotic;tetracycline antibiotic
CP031146.1.region002	CP0311460012	ARO:3000800|MexC|AAB41956.1	3.35e-46	160	efflux pump	aminocoumarin antibiotic;aminoglycoside antibiotic;cephalosporin;diaminopyrimidine antibiotic;fluoroquinolone antibiotic;macrolide antibiotic;penam;phenicol antibiotic;tetracycline antibiotic
CP031700.1.region003	CP0317000001	ARO:3000802|OprJ|AAB41958.1	1.15e-107	325	efflux pump	aminocoumarin antibiotic;aminoglycoside antibiotic;cephalosporin;diaminopyrimidine antibiotic;fluoroquinolone antibiotic;macrolide antibiotic;penam;phenicol antibiotic;tetracycline antibiotic
CP033577.1.region001	CP0335770029	ARO:3000802|OprJ|AAB41958.1	1.06e-41	152	efflux pump	aminocoumarin antibiotic;aminoglycoside antibiotic;cephalosporin;diaminopyrimidine antibiotic;fluoroquinolone antibiotic;macrolide antibiotic;penam;phenicol antibiotic;tetracycline antibiotic
CP034425.1.region006	CP0344250020	ARO:3000802|OprJ|AAB41958.1	3.26e-112	337	efflux pump	aminocoumarin antibiotic;aminoglycoside antibiotic;cephalosporin;diaminopyrimidine antibiotic;fluoroquinolone antibiotic;macrolide antibiotic;penam;phenicol antibiotic;tetracycline antibiotic
CP036292.1.region010	CP0362920014	ARO:3000802|OprJ|AAB41958.1	2.77e-32	127	efflux pump	aminocoumarin antibiotic;aminoglycoside antibiotic;cephalosporin;diaminopyrimidine antibiotic;fluoroquinolone antibiotic;macrolide antibiotic;penam;phenicol antibiotic;tetracycline antibiotic
CP036313.1.region002	CP0363130009	ARO:3000802|OprJ|AAB41958.1	1.09e-49	174	efflux pump	aminocoumarin antibiotic;aminoglycoside antibiotic;cephalosporin;diaminopyrimidine antibiotic;fluoroquinolone antibiotic;macrolide antibiotic;penam;phenicol antibiotic;tetracycline antibiotic
CP036349.1.region006	CP0363490006	ARO:3000801|MexD|AAB41957.1	4.39e-53	199	efflux pump	aminocoumarin antibiotic;aminoglycoside antibiotic;cephalosporin;diaminopyrimidine antibiotic;fluoroquinolone antibiotic;macrolide antibiotic;penam;phenicol antibiotic;tetracycline antibiotic
CP036426.1.region004	CP0364260001	ARO:3000800|MexC|AAB41956.1	2.06e-43	154	efflux pump	aminocoumarin antibiotic;aminoglycoside antibiotic;cephalosporin;diaminopyrimidine antibiotic;fluoroquinolone antibiotic;macrolide antibiotic;penam;phenicol antibiotic;tetracycline antibiotic
CP040263.1.region003	CP0402630035	ARO:3000802|OprJ|AAB41958.1	8.91e-91	281	efflux pump	aminocoumarin antibiotic;aminoglycoside antibiotic;cephalosporin;diaminopyrimidine antibiotic;fluoroquinolone antibiotic;macrolide antibiotic;penam;phenicol antibiotic;tetracycline antibiotic
CP040269.1.region002	CP0402690037	ARO:3000802|OprJ|AAB41958.1	6.74e-91	281	efflux pump	aminocoumarin antibiotic;aminoglycoside antibiotic;cephalosporin;diaminopyrimidine antibiotic;fluoroquinolone antibiotic;macrolide antibiotic;penam;phenicol antibiotic;tetracycline antibiotic
CP040443.1.region002	CP0404430002	ARO:3000802|OprJ|AAB41958.1	3.56e-90	280	efflux pump	aminocoumarin antibiotic;aminoglycoside antibiotic;cephalosporin;diaminopyrimidine antibiotic;fluoroquinolone antibiotic;macrolide antibiotic;penam;phenicol antibiotic;tetracycline antibiotic
CP041025.1.region007	CP0410250004	ARO:3000802|OprJ|AAB41958.1	1.02e-31	124	efflux pump	aminocoumarin antibiotic;aminoglycoside antibiotic;cephalosporin;diaminopyrimidine antibiotic;fluoroquinolone antibiotic;macrolide antibiotic;penam;phenicol antibiotic;tetracycline antibiotic
CP041783.1.region001	CP0417830019	ARO:3000800|MexC|AAB41956.1	3.88e-49	168	efflux pump	aminocoumarin antibiotic;aminoglycoside antibiotic;cephalosporin;diaminopyrimidine antibiotic;fluoroquinolone antibiotic;macrolide antibiotic;penam;phenicol antibiotic;tetracycline antibiotic
CP041783.1.region001	CP0417830021	ARO:3000802|OprJ|AAB41958.1	1.75e-50	176	efflux pump	aminocoumarin antibiotic;aminoglycoside antibiotic;cephalosporin;diaminopyrimidine antibiotic;fluoroquinolone antibiotic;macrolide antibiotic;penam;phenicol antibiotic;tetracycline antibiotic
CP042994.1.region001	CP0429940030	ARO:3000800|MexC|AAB41956.1	1.3e-85	262	efflux pump	aminocoumarin antibiotic;aminoglycoside antibiotic;cephalosporin;diaminopyrimidine antibiotic;fluoroquinolone antibiotic;macrolide antibiotic;penam;phenicol antibiotic;tetracycline antibiotic
CP043042.1.region001	CP0430420001	ARO:3000802|OprJ|AAB41958.1	1.75e-103	315	efflux pump	aminocoumarin antibiotic;aminoglycoside antibiotic;cephalosporin;diaminopyrimidine antibiotic;fluoroquinolone antibiotic;macrolide antibiotic;penam;phenicol antibiotic;tetracycline antibiotic
CP046103.1.region008	CP0461030018	ARO:3000802|OprJ|AAB41958.1	1.59e-110	332	efflux pump	aminocoumarin antibiotic;aminoglycoside antibiotic;cephalosporin;diaminopyrimidine antibiotic;fluoroquinolone antibiotic;macrolide antibiotic;penam;phenicol antibiotic;tetracycline antibiotic
CP046535.1.region004	CP0465350032	ARO:3000802|OprJ|AAB41958.1	2.02e-43	156	efflux pump	aminocoumarin antibiotic;aminoglycoside antibiotic;cephalosporin;diaminopyrimidine antibiotic;fluoroquinolone antibiotic;macrolide antibiotic;penam;phenicol antibiotic;tetracycline antibiotic
CP047026.1.region002	CP0470260002	ARO:3000800|MexC|AAB41956.1	1.39e-33	125	efflux pump	aminocoumarin antibiotic;aminoglycoside antibiotic;cephalosporin;diaminopyrimidine antibiotic;fluoroquinolone antibiotic;macrolide antibiotic;penam;phenicol antibiotic;tetracycline antibiotic
CP048620.1.region002	CP0486200001	ARO:3000802|OprJ|AAB41958.1	2.52e-43	157	efflux pump	aminocoumarin antibiotic;aminoglycoside antibiotic;cephalosporin;diaminopyrimidine antibiotic;fluoroquinolone antibiotic;macrolide antibiotic;penam;phenicol antibiotic;tetracycline antibiotic
CP062941.1.region002	CP0629410018	ARO:3000802|OprJ|AAB41958.1	3.23e-60	202	efflux pump	aminocoumarin antibiotic;aminoglycoside antibiotic;cephalosporin;diaminopyrimidine antibiotic;fluoroquinolone antibiotic;macrolide antibiotic;penam;phenicol antibiotic;tetracycline antibiotic
CP064942.1.region005	CP0649420037	ARO:3000800|MexC|AAB41956.1	1.03e-40	145	efflux pump	aminocoumarin antibiotic;aminoglycoside antibiotic;cephalosporin;diaminopyrimidine antibiotic;fluoroquinolone antibiotic;macrolide antibiotic;penam;phenicol antibiotic;tetracycline antibiotic
AP012338.1.region004	AP0123380002	ARO:3000378|MexB|AAA74437.1	5.4e-59	218	efflux pump	aminocoumarin antibiotic;carbapenem;cephalosporin;cephamycin;diaminopyrimidine antibiotic;fluoroquinolone antibiotic;macrolide antibiotic;monobactam;penam;penem;peptide antibiotic;phenicol antibiotic;sulfonamide antibiotic;tetracycline antibiotic
AP012978.1.region001	AP0129780012	ARO:3000378|MexB|AAA74437.1	2.19e-61	224	efflux pump	aminocoumarin antibiotic;carbapenem;cephalosporin;cephamycin;diaminopyrimidine antibiotic;fluoroquinolone antibiotic;macrolide antibiotic;monobactam;penam;penem;peptide antibiotic;phenicol antibiotic;sulfonamide antibiotic;tetracycline antibiotic
AP014545.1.region003	AP0145450004	ARO:3000378|MexB|AAA74437.1	1.53e-52	197	efflux pump	aminocoumarin antibiotic;carbapenem;cephalosporin;cephamycin;diaminopyrimidine antibiotic;fluoroquinolone antibiotic;macrolide antibiotic;monobactam;penam;penem;peptide antibiotic;phenicol antibiotic;sulfonamide antibiotic;tetracycline antibiotic
AP014648.1.region007	AP0146480005	ARO:3000378|MexB|AAA74437.1	1.3e-39	156	efflux pump	aminocoumarin antibiotic;carbapenem;cephalosporin;cephamycin;diaminopyrimidine antibiotic;fluoroquinolone antibiotic;macrolide antibiotic;monobactam;penam;penem;peptide antibiotic;phenicol antibiotic;sulfonamide antibiotic;tetracycline antibiotic
AP019807.1.region007	AP0198070046	ARO:3000378|MexB|AAA74437.1	6.97e-62	226	efflux pump	aminocoumarin antibiotic;carbapenem;cephalosporin;cephamycin;diaminopyrimidine antibiotic;fluoroquinolone antibiotic;macrolide antibiotic;monobactam;penam;penem;peptide antibiotic;phenicol antibiotic;sulfonamide antibiotic;tetracycline antibiotic
AP019860.1.region009	AP0198600020	ARO:3000378|MexB|AAA74437.1	4.72e-32	132	efflux pump	aminocoumarin antibiotic;carbapenem;cephalosporin;cephamycin;diaminopyrimidine antibiotic;fluoroquinolone antibiotic;macrolide antibiotic;monobactam;penam;penem;peptide antibiotic;phenicol antibiotic;sulfonamide antibiotic;tetracycline antibiotic
AP019860.1.region016	AP0198600020	ARO:3000378|MexB|AAA74437.1	2.15e-54	203	efflux pump	aminocoumarin antibiotic;carbapenem;cephalosporin;cephamycin;diaminopyrimidine antibiotic;fluoroquinolone antibiotic;macrolide antibiotic;monobactam;penam;penem;peptide antibiotic;phenicol antibiotic;sulfonamide antibiotic;tetracycline antibiotic
AP019860.1.region019	AP0198600021	ARO:3000378|MexB|AAA74437.1	9.16e-45	173	efflux pump	aminocoumarin antibiotic;carbapenem;cephalosporin;cephamycin;diaminopyrimidine antibiotic;fluoroquinolone antibiotic;macrolide antibiotic;monobactam;penam;penem;peptide antibiotic;phenicol antibiotic;sulfonamide antibiotic;tetracycline antibiotic
AP019860.1.region013	AP0198600027	ARO:3000378|MexB|AAA74437.1	6.08e-42	164	efflux pump	aminocoumarin antibiotic;carbapenem;cephalosporin;cephamycin;diaminopyrimidine antibiotic;fluoroquinolone antibiotic;macrolide antibiotic;monobactam;penam;penem;peptide antibiotic;phenicol antibiotic;sulfonamide antibiotic;tetracycline antibiotic
AP021846.1.region001	AP0218460016	ARO:3000378|MexB|AAA74437.1	6.38e-55	204	efflux pump	aminocoumarin antibiotic;carbapenem;cephalosporin;cephamycin;diaminopyrimidine antibiotic;fluoroquinolone antibiotic;macrolide antibiotic;monobactam;penam;penem;peptide antibiotic;phenicol antibiotic;sulfonamide antibiotic;tetracycline antibiotic
AP021879.1.region003	AP0218790005	ARO:3000378|MexB|AAA74437.1	0	739	efflux pump	aminocoumarin antibiotic;carbapenem;cephalosporin;cephamycin;diaminopyrimidine antibiotic;fluoroquinolone antibiotic;macrolide antibiotic;monobactam;penam;penem;peptide antibiotic;phenicol antibiotic;sulfonamide antibiotic;tetracycline antibiotic
AP023240.1.region001	AP0232400001	ARO:3000378|MexB|AAA74437.1	7.26e-44	168	efflux pump	aminocoumarin antibiotic;carbapenem;cephalosporin;cephamycin;diaminopyrimidine antibiotic;fluoroquinolone antibiotic;macrolide antibiotic;monobactam;penam;penem;peptide antibiotic;phenicol antibiotic;sulfonamide antibiotic;tetracycline antibiotic
CP000302.1.region009	CP0003020015	ARO:3000378|MexB|AAA74437.1	1.25e-46	178	efflux pump	aminocoumarin antibiotic;carbapenem;cephalosporin;cephamycin;diaminopyrimidine antibiotic;fluoroquinolone antibiotic;macrolide antibiotic;monobactam;penam;penem;peptide antibiotic;phenicol antibiotic;sulfonamide antibiotic;tetracycline antibiotic
CP000469.1.region004	CP0004690001	ARO:3000378|MexB|AAA74437.1	3.14e-175	537	efflux pump	aminocoumarin antibiotic;carbapenem;cephalosporin;cephamycin;diaminopyrimidine antibiotic;fluoroquinolone antibiotic;macrolide antibiotic;monobactam;penam;penem;peptide antibiotic;phenicol antibiotic;sulfonamide antibiotic;tetracycline antibiotic
CP000472.1.region006	CP0004720023	ARO:3000378|MexB|AAA74437.1	1.83e-177	542	efflux pump	aminocoumarin antibiotic;carbapenem;cephalosporin;cephamycin;diaminopyrimidine antibiotic;fluoroquinolone antibiotic;macrolide antibiotic;monobactam;penam;penem;peptide antibiotic;phenicol antibiotic;sulfonamide antibiotic;tetracycline antibiotic
CP000606.1.region004	CP0006060031	ARO:3000378|MexB|AAA74437.1	4.42e-52	196	efflux pump	aminocoumarin antibiotic;carbapenem;cephalosporin;cephamycin;diaminopyrimidine antibiotic;fluoroquinolone antibiotic;macrolide antibiotic;monobactam;penam;penem;peptide antibiotic;phenicol antibiotic;sulfonamide antibiotic;tetracycline antibiotic
CP000851.1.region004	CP0008510022	ARO:3000378|MexB|AAA74437.1	0	906	efflux pump	aminocoumarin antibiotic;carbapenem;cephalosporin;cephamycin;diaminopyrimidine antibiotic;fluoroquinolone antibiotic;macrolide antibiotic;monobactam;penam;penem;peptide antibiotic;phenicol antibiotic;sulfonamide antibiotic;tetracycline antibiotic
CP000931.1.region005	CP0009310020	ARO:3000378|MexB|AAA74437.1	0	918	efflux pump	aminocoumarin antibiotic;carbapenem;cephalosporin;cephamycin;diaminopyrimidine antibiotic;fluoroquinolone antibiotic;macrolide antibiotic;monobactam;penam;penem;peptide antibiotic;phenicol antibiotic;sulfonamide antibiotic;tetracycline antibiotic
CP001230.1.region001	CP0012300006	ARO:3000378|MexB|AAA74437.1	7.31e-68	244	efflux pump	aminocoumarin antibiotic;carbapenem;cephalosporin;cephamycin;diaminopyrimidine antibiotic;fluoroquinolone antibiotic;macrolide antibiotic;monobactam;penam;penem;peptide antibiotic;phenicol antibiotic;sulfonamide antibiotic;tetracycline antibiotic
CP001279.1.region002	CP0012790009	ARO:3000378|MexB|AAA74437.1	3.98e-50	189	efflux pump	aminocoumarin antibiotic;carbapenem;cephalosporin;cephamycin;diaminopyrimidine antibiotic;fluoroquinolone antibiotic;macrolide antibiotic;monobactam;penam;penem;peptide antibiotic;phenicol antibiotic;sulfonamide antibiotic;tetracycline antibiotic
CP001614.2.region002	CP0016140010	ARO:3000378|MexB|AAA74437.1	3.27e-56	208	efflux pump	aminocoumarin antibiotic;carbapenem;cephalosporin;cephamycin;diaminopyrimidine antibiotic;fluoroquinolone antibiotic;macrolide antibiotic;monobactam;penam;penem;peptide antibiotic;phenicol antibiotic;sulfonamide antibiotic;tetracycline antibiotic
CP001614.2.region011	CP0016140031	ARO:3000378|MexB|AAA74437.1	3.23e-160	498	efflux pump	aminocoumarin antibiotic;carbapenem;cephalosporin;cephamycin;diaminopyrimidine antibiotic;fluoroquinolone antibiotic;macrolide antibiotic;monobactam;penam;penem;peptide antibiotic;phenicol antibiotic;sulfonamide antibiotic;tetracycline antibiotic
CP001649.1.region001	CP0016490038	ARO:3000378|MexB|AAA74437.1	3.75e-49	187	efflux pump	aminocoumarin antibiotic;carbapenem;cephalosporin;cephamycin;diaminopyrimidine antibiotic;fluoroquinolone antibiotic;macrolide antibiotic;monobactam;penam;penem;peptide antibiotic;phenicol antibiotic;sulfonamide antibiotic;tetracycline antibiotic
CP001712.1.region001	CP0017120019	ARO:3000378|MexB|AAA74437.1	2.82e-58	216	efflux pump	aminocoumarin antibiotic;carbapenem;cephalosporin;cephamycin;diaminopyrimidine antibiotic;fluoroquinolone antibiotic;macrolide antibiotic;monobactam;penam;penem;peptide antibiotic;phenicol antibiotic;sulfonamide antibiotic;tetracycline antibiotic
CP001804.1.region022	CP0018040008	ARO:3000378|MexB|AAA74437.1	1.53e-47	181	efflux pump	aminocoumarin antibiotic;carbapenem;cephalosporin;cephamycin;diaminopyrimidine antibiotic;fluoroquinolone antibiotic;macrolide antibiotic;monobactam;penam;penem;peptide antibiotic;phenicol antibiotic;sulfonamide antibiotic;tetracycline antibiotic
CP002086.1.region002	CP0020860026	ARO:3000378|MexB|AAA74437.1	6.04e-59	217	efflux pump	aminocoumarin antibiotic;carbapenem;cephalosporin;cephamycin;diaminopyrimidine antibiotic;fluoroquinolone antibiotic;macrolide antibiotic;monobactam;penam;penem;peptide antibiotic;phenicol antibiotic;sulfonamide antibiotic;tetracycline antibiotic
CP002339.1.region004	CP0023390026	ARO:3000378|MexB|AAA74437.1	8.31e-42	163	efflux pump	aminocoumarin antibiotic;carbapenem;cephalosporin;cephamycin;diaminopyrimidine antibiotic;fluoroquinolone antibiotic;macrolide antibiotic;monobactam;penam;penem;peptide antibiotic;phenicol antibiotic;sulfonamide antibiotic;tetracycline antibiotic
CP002453.1.region001	CP0024530002	ARO:3000378|MexB|AAA74437.1	3.13e-61	225	efflux pump	aminocoumarin antibiotic;carbapenem;cephalosporin;cephamycin;diaminopyrimidine antibiotic;fluoroquinolone antibiotic;macrolide antibiotic;monobactam;penam;penem;peptide antibiotic;phenicol antibiotic;sulfonamide antibiotic;tetracycline antibiotic
CP002583.1.region009	CP0025830032	ARO:3000378|MexB|AAA74437.1	1.2e-62	228	efflux pump	aminocoumarin antibiotic;carbapenem;cephalosporin;cephamycin;diaminopyrimidine antibiotic;fluoroquinolone antibiotic;macrolide antibiotic;monobactam;penam;penem;peptide antibiotic;phenicol antibiotic;sulfonamide antibiotic;tetracycline antibiotic
CP002830.1.region004	CP0028300008	ARO:3000378|MexB|AAA74437.1	4.31e-54	202	efflux pump	aminocoumarin antibiotic;carbapenem;cephalosporin;cephamycin;diaminopyrimidine antibiotic;fluoroquinolone antibiotic;macrolide antibiotic;monobactam;penam;penem;peptide antibiotic;phenicol antibiotic;sulfonamide antibiotic;tetracycline antibiotic
CP002999.1.region001	CP0029990002	ARO:3000378|MexB|AAA74437.1	1.12e-60	223	efflux pump	aminocoumarin antibiotic;carbapenem;cephalosporin;cephamycin;diaminopyrimidine antibiotic;fluoroquinolone antibiotic;macrolide antibiotic;monobactam;penam;penem;peptide antibiotic;phenicol antibiotic;sulfonamide antibiotic;tetracycline antibiotic
CP003147.1.region002	CP0031470012	ARO:3000378|MexB|AAA74437.1	6.54e-54	201	efflux pump	aminocoumarin antibiotic;carbapenem;cephalosporin;cephamycin;diaminopyrimidine antibiotic;fluoroquinolone antibiotic;macrolide antibiotic;monobactam;penam;penem;peptide antibiotic;phenicol antibiotic;sulfonamide antibiotic;tetracycline antibiotic
CP003221.1.region003	CP0032210026	ARO:3000378|MexB|AAA74437.1	6.11e-123	398	efflux pump	aminocoumarin antibiotic;carbapenem;cephalosporin;cephamycin;diaminopyrimidine antibiotic;fluoroquinolone antibiotic;macrolide antibiotic;monobactam;penam;penem;peptide antibiotic;phenicol antibiotic;sulfonamide antibiotic;tetracycline antibiotic
CP003239.1.region003	CP0032390002	ARO:3000378|MexB|AAA74437.1	1.98e-179	548	efflux pump	aminocoumarin antibiotic;carbapenem;cephalosporin;cephamycin;diaminopyrimidine antibiotic;fluoroquinolone antibiotic;macrolide antibiotic;monobactam;penam;penem;peptide antibiotic;phenicol antibiotic;sulfonamide antibiotic;tetracycline antibiotic
CP003239.1.region003	CP0032390011	ARO:3000378|MexB|AAA74437.1	4.45e-122	395	efflux pump	aminocoumarin antibiotic;carbapenem;cephalosporin;cephamycin;diaminopyrimidine antibiotic;fluoroquinolone antibiotic;macrolide antibiotic;monobactam;penam;penem;peptide antibiotic;phenicol antibiotic;sulfonamide antibiotic;tetracycline antibiotic
CP003879.1.region004	CP0038790045	ARO:3000378|MexB|AAA74437.1	9.51e-50	188	efflux pump	aminocoumarin antibiotic;carbapenem;cephalosporin;cephamycin;diaminopyrimidine antibiotic;fluoroquinolone antibiotic;macrolide antibiotic;monobactam;penam;penem;peptide antibiotic;phenicol antibiotic;sulfonamide antibiotic;tetracycline antibiotic
CP003985.1.region003	CP0039850035	ARO:3000378|MexB|AAA74437.1	7.46e-32	131	efflux pump	aminocoumarin antibiotic;carbapenem;cephalosporin;cephamycin;diaminopyrimidine antibiotic;fluoroquinolone antibiotic;macrolide antibiotic;monobactam;penam;penem;peptide antibiotic;phenicol antibiotic;sulfonamide antibiotic;tetracycline antibiotic
CP004349.1.region002	CP0043490009	ARO:3000378|MexB|AAA74437.1	1.83e-46	178	efflux pump	aminocoumarin antibiotic;carbapenem;cephalosporin;cephamycin;diaminopyrimidine antibiotic;fluoroquinolone antibiotic;macrolide antibiotic;monobactam;penam;penem;peptide antibiotic;phenicol antibiotic;sulfonamide antibiotic;tetracycline antibiotic
CP004851.1.region001	CP0048510049	ARO:3000378|MexB|AAA74437.1	6.84e-62	226	efflux pump	aminocoumarin antibiotic;carbapenem;cephalosporin;cephamycin;diaminopyrimidine antibiotic;fluoroquinolone antibiotic;macrolide antibiotic;monobactam;penam;penem;peptide antibiotic;phenicol antibiotic;sulfonamide antibiotic;tetracycline antibiotic
CP004852.1.region001	CP0048520048	ARO:3000378|MexB|AAA74437.1	4.56e-58	214	efflux pump	aminocoumarin antibiotic;carbapenem;cephalosporin;cephamycin;diaminopyrimidine antibiotic;fluoroquinolone antibiotic;macrolide antibiotic;monobactam;penam;penem;peptide antibiotic;phenicol antibiotic;sulfonamide antibiotic;tetracycline antibiotic
CP005974.1.region004	CP0059740011	ARO:3000378|MexB|AAA74437.1	6.56e-36	144	efflux pump	aminocoumarin antibiotic;carbapenem;cephalosporin;cephamycin;diaminopyrimidine antibiotic;fluoroquinolone antibiotic;macrolide antibiotic;monobactam;penam;penem;peptide antibiotic;phenicol antibiotic;sulfonamide antibiotic;tetracycline antibiotic
CP009355.1.region002	CP0093550029	ARO:3000378|MexB|AAA74437.1	0	686	efflux pump	aminocoumarin antibiotic;carbapenem;cephalosporin;cephamycin;diaminopyrimidine antibiotic;fluoroquinolone antibiotic;macrolide antibiotic;monobactam;penam;penem;peptide antibiotic;phenicol antibiotic;sulfonamide antibiotic;tetracycline antibiotic
CP009617.1.region005	CP0096170026	ARO:3000378|MexB|AAA74437.1	7.01e-58	214	efflux pump	aminocoumarin antibiotic;carbapenem;cephalosporin;cephamycin;diaminopyrimidine antibiotic;fluoroquinolone antibiotic;macrolide antibiotic;monobactam;penam;penem;peptide antibiotic;phenicol antibiotic;sulfonamide antibiotic;tetracycline antibiotic
CP009887.1.region002	CP0098870002	ARO:3000378|MexB|AAA74437.1	1.99e-63	232	efflux pump	aminocoumarin antibiotic;carbapenem;cephalosporin;cephamycin;diaminopyrimidine antibiotic;fluoroquinolone antibiotic;macrolide antibiotic;monobactam;penam;penem;peptide antibiotic;phenicol antibiotic;sulfonamide antibiotic;tetracycline antibiotic
CP009976.1.region001	CP0099760002	ARO:3000378|MexB|AAA74437.1	1.58e-63	232	efflux pump	aminocoumarin antibiotic;carbapenem;cephalosporin;cephamycin;diaminopyrimidine antibiotic;fluoroquinolone antibiotic;macrolide antibiotic;monobactam;penam;penem;peptide antibiotic;phenicol antibiotic;sulfonamide antibiotic;tetracycline antibiotic
CP011071.1.region001	CP0110710001	ARO:3000378|MexB|AAA74437.1	3.1e-58	216	efflux pump	aminocoumarin antibiotic;carbapenem;cephalosporin;cephamycin;diaminopyrimidine antibiotic;fluoroquinolone antibiotic;macrolide antibiotic;monobactam;penam;penem;peptide antibiotic;phenicol antibiotic;sulfonamide antibiotic;tetracycline antibiotic
CP011460.1.region001	CP0114600033	ARO:3000378|MexB|AAA74437.1	8.92e-54	201	efflux pump	aminocoumarin antibiotic;carbapenem;cephalosporin;cephamycin;diaminopyrimidine antibiotic;fluoroquinolone antibiotic;macrolide antibiotic;monobactam;penam;penem;peptide antibiotic;phenicol antibiotic;sulfonamide antibiotic;tetracycline antibiotic
CP012154.1.region004	CP0121540019	ARO:3000378|MexB|AAA74437.1	2.82e-33	135	efflux pump	aminocoumarin antibiotic;carbapenem;cephalosporin;cephamycin;diaminopyrimidine antibiotic;fluoroquinolone antibiotic;macrolide antibiotic;monobactam;penam;penem;peptide antibiotic;phenicol antibiotic;sulfonamide antibiotic;tetracycline antibiotic
CP012737.1.region004	CP0127370020	ARO:3000378|MexB|AAA74437.1	7.87e-123	398	efflux pump	aminocoumarin antibiotic;carbapenem;cephalosporin;cephamycin;diaminopyrimidine antibiotic;fluoroquinolone antibiotic;macrolide antibiotic;monobactam;penam;penem;peptide antibiotic;phenicol antibiotic;sulfonamide antibiotic;tetracycline antibiotic
CP013021.1.region003	CP0130210003	ARO:3000378|MexB|AAA74437.1	6.39e-40	157	efflux pump	aminocoumarin antibiotic;carbapenem;cephalosporin;cephamycin;diaminopyrimidine antibiotic;fluoroquinolone antibiotic;macrolide antibiotic;monobactam;penam;penem;peptide antibiotic;phenicol antibiotic;sulfonamide antibiotic;tetracycline antibiotic
CP013120.1.region004	CP0131200020	ARO:3000378|MexB|AAA74437.1	2.48e-45	174	efflux pump	aminocoumarin antibiotic;carbapenem;cephalosporin;cephamycin;diaminopyrimidine antibiotic;fluoroquinolone antibiotic;macrolide antibiotic;monobactam;penam;penem;peptide antibiotic;phenicol antibiotic;sulfonamide antibiotic;tetracycline antibiotic
CP013187.1.region003	CP0131870033	ARO:3000378|MexB|AAA74437.1	7.46e-81	283	efflux pump	aminocoumarin antibiotic;carbapenem;cephalosporin;cephamycin;diaminopyrimidine antibiotic;fluoroquinolone antibiotic;macrolide antibiotic;monobactam;penam;penem;peptide antibiotic;phenicol antibiotic;sulfonamide antibiotic;tetracycline antibiotic
CP013611.1.region008	CP0136110022	ARO:3000378|MexB|AAA74437.1	3.31e-123	399	efflux pump	aminocoumarin antibiotic;carbapenem;cephalosporin;cephamycin;diaminopyrimidine antibiotic;fluoroquinolone antibiotic;macrolide antibiotic;monobactam;penam;penem;peptide antibiotic;phenicol antibiotic;sulfonamide antibiotic;tetracycline antibiotic
CP014470.1.region001	CP0144700038	ARO:3000378|MexB|AAA74437.1	2.98e-66	239	efflux pump	aminocoumarin antibiotic;carbapenem;cephalosporin;cephamycin;diaminopyrimidine antibiotic;fluoroquinolone antibiotic;macrolide antibiotic;monobactam;penam;penem;peptide antibiotic;phenicol antibiotic;sulfonamide antibiotic;tetracycline antibiotic
CP014782.1.region005	CP0147820007	ARO:3000378|MexB|AAA74437.1	3.33e-149	468	efflux pump	aminocoumarin antibiotic;carbapenem;cephalosporin;cephamycin;diaminopyrimidine antibiotic;fluoroquinolone antibiotic;macrolide antibiotic;monobactam;penam;penem;peptide antibiotic;phenicol antibiotic;sulfonamide antibiotic;tetracycline antibiotic
CP015345.1.region001	CP0153450020	ARO:3000378|MexB|AAA74437.1	2.47e-45	174	efflux pump	aminocoumarin antibiotic;carbapenem;cephalosporin;cephamycin;diaminopyrimidine antibiotic;fluoroquinolone antibiotic;macrolide antibiotic;monobactam;penam;penem;peptide antibiotic;phenicol antibiotic;sulfonamide antibiotic;tetracycline antibiotic
CP015415.1.region002	CP0154150012	ARO:3000378|MexB|AAA74437.1	4.42e-40	158	efflux pump	aminocoumarin antibiotic;carbapenem;cephalosporin;cephamycin;diaminopyrimidine antibiotic;fluoroquinolone antibiotic;macrolide antibiotic;monobactam;penam;penem;peptide antibiotic;phenicol antibiotic;sulfonamide antibiotic;tetracycline antibiotic
CP015416.1.region001	CP0154160024	ARO:3000378|MexB|AAA74437.1	6.03e-32	131	efflux pump	aminocoumarin antibiotic;carbapenem;cephalosporin;cephamycin;diaminopyrimidine antibiotic;fluoroquinolone antibiotic;macrolide antibiotic;monobactam;penam;penem;peptide antibiotic;phenicol antibiotic;sulfonamide antibiotic;tetracycline antibiotic
CP016177.1.region001	CP0161770012	ARO:3000378|MexB|AAA74437.1	6.32e-41	160	efflux pump	aminocoumarin antibiotic;carbapenem;cephalosporin;cephamycin;diaminopyrimidine antibiotic;fluoroquinolone antibiotic;macrolide antibiotic;monobactam;penam;penem;peptide antibiotic;phenicol antibiotic;sulfonamide antibiotic;tetracycline antibiotic
CP016268.1.region003	CP0162680012	ARO:3000378|MexB|AAA74437.1	4.96e-43	167	efflux pump	aminocoumarin antibiotic;carbapenem;cephalosporin;cephamycin;diaminopyrimidine antibiotic;fluoroquinolone antibiotic;macrolide antibiotic;monobactam;penam;penem;peptide antibiotic;phenicol antibiotic;sulfonamide antibiotic;tetracycline antibiotic
CP016359.1.region002	CP0163590034	ARO:3000378|MexB|AAA74437.1	2.72e-56	210	efflux pump	aminocoumarin antibiotic;carbapenem;cephalosporin;cephamycin;diaminopyrimidine antibiotic;fluoroquinolone antibiotic;macrolide antibiotic;monobactam;penam;penem;peptide antibiotic;phenicol antibiotic;sulfonamide antibiotic;tetracycline antibiotic
CP017476.1.region005	CP0174760004	ARO:3000378|MexB|AAA74437.1	1.68e-53	200	efflux pump	aminocoumarin antibiotic;carbapenem;cephalosporin;cephamycin;diaminopyrimidine antibiotic;fluoroquinolone antibiotic;macrolide antibiotic;monobactam;penam;penem;peptide antibiotic;phenicol antibiotic;sulfonamide antibiotic;tetracycline antibiotic
CP017477.1.region002	CP0174770001	ARO:3000378|MexB|AAA74437.1	0	758	efflux pump	aminocoumarin antibiotic;carbapenem;cephalosporin;cephamycin;diaminopyrimidine antibiotic;fluoroquinolone antibiotic;macrolide antibiotic;monobactam;penam;penem;peptide antibiotic;phenicol antibiotic;sulfonamide antibiotic;tetracycline antibiotic
CP017599.1.region026	CP0175990009	ARO:3000378|MexB|AAA74437.1	1.16e-42	166	efflux pump	aminocoumarin antibiotic;carbapenem;cephalosporin;cephamycin;diaminopyrimidine antibiotic;fluoroquinolone antibiotic;macrolide antibiotic;monobactam;penam;penem;peptide antibiotic;phenicol antibiotic;sulfonamide antibiotic;tetracycline antibiotic
CP017599.1.region012	CP0175990048	ARO:3000378|MexB|AAA74437.1	1.25e-36	140	efflux pump	aminocoumarin antibiotic;carbapenem;cephalosporin;cephamycin;diaminopyrimidine antibiotic;fluoroquinolone antibiotic;macrolide antibiotic;monobactam;penam;penem;peptide antibiotic;phenicol antibiotic;sulfonamide antibiotic;tetracycline antibiotic
CP017708.1.region031	CP0177080005	ARO:3000378|MexB|AAA74437.1	1.45e-46	178	efflux pump	aminocoumarin antibiotic;carbapenem;cephalosporin;cephamycin;diaminopyrimidine antibiotic;fluoroquinolone antibiotic;macrolide antibiotic;monobactam;penam;penem;peptide antibiotic;phenicol antibiotic;sulfonamide antibiotic;tetracycline antibiotic
CP017708.1.region017	CP0177080043	ARO:3000378|MexB|AAA74437.1	4.88e-34	138	efflux pump	aminocoumarin antibiotic;carbapenem;cephalosporin;cephamycin;diaminopyrimidine antibiotic;fluoroquinolone antibiotic;macrolide antibiotic;monobactam;penam;penem;peptide antibiotic;phenicol antibiotic;sulfonamide antibiotic;tetracycline antibiotic
CP017708.1.region015	CP0177080045	ARO:3000378|MexB|AAA74437.1	1.28e-41	162	efflux pump	aminocoumarin antibiotic;carbapenem;cephalosporin;cephamycin;diaminopyrimidine antibiotic;fluoroquinolone antibiotic;macrolide antibiotic;monobactam;penam;penem;peptide antibiotic;phenicol antibiotic;sulfonamide antibiotic;tetracycline antibiotic
CP017916.1.region004	CP0179160011	ARO:3000378|MexB|AAA74437.1	2.96e-39	155	efflux pump	aminocoumarin antibiotic;carbapenem;cephalosporin;cephamycin;diaminopyrimidine antibiotic;fluoroquinolone antibiotic;macrolide antibiotic;monobactam;penam;penem;peptide antibiotic;phenicol antibiotic;sulfonamide antibiotic;tetracycline antibiotic
CP018197.1.region003	CP0181970038	ARO:3000378|MexB|AAA74437.1	9.18e-65	235	efflux pump	aminocoumarin antibiotic;carbapenem;cephalosporin;cephamycin;diaminopyrimidine antibiotic;fluoroquinolone antibiotic;macrolide antibiotic;monobactam;penam;penem;peptide antibiotic;phenicol antibiotic;sulfonamide antibiotic;tetracycline antibiotic
CP018297.1.region001	CP0182970017	ARO:3000378|MexB|AAA74437.1	6.51e-143	452	efflux pump	aminocoumarin antibiotic;carbapenem;cephalosporin;cephamycin;diaminopyrimidine antibiotic;fluoroquinolone antibiotic;macrolide antibiotic;monobactam;penam;penem;peptide antibiotic;phenicol antibiotic;sulfonamide antibiotic;tetracycline antibiotic
CP018308.1.region002	CP0183080012	ARO:3000378|MexB|AAA74437.1	1.07e-43	169	efflux pump	aminocoumarin antibiotic;carbapenem;cephalosporin;cephamycin;diaminopyrimidine antibiotic;fluoroquinolone antibiotic;macrolide antibiotic;monobactam;penam;penem;peptide antibiotic;phenicol antibiotic;sulfonamide antibiotic;tetracycline antibiotic
CP018308.1.region003	CP0183080028	ARO:3000378|MexB|AAA74437.1	6.91e-38	150	efflux pump	aminocoumarin antibiotic;carbapenem;cephalosporin;cephamycin;diaminopyrimidine antibiotic;fluoroquinolone antibiotic;macrolide antibiotic;monobactam;penam;penem;peptide antibiotic;phenicol antibiotic;sulfonamide antibiotic;tetracycline antibiotic
CP020772.1.region003	CP0207720007	ARO:3000378|MexB|AAA74437.1	6.5e-58	214	efflux pump	aminocoumarin antibiotic;carbapenem;cephalosporin;cephamycin;diaminopyrimidine antibiotic;fluoroquinolone antibiotic;macrolide antibiotic;monobactam;penam;penem;peptide antibiotic;phenicol antibiotic;sulfonamide antibiotic;tetracycline antibiotic
CP021112.1.region005	CP0211120004	ARO:3000378|MexB|AAA74437.1	1.33e-130	419	efflux pump	aminocoumarin antibiotic;carbapenem;cephalosporin;cephamycin;diaminopyrimidine antibiotic;fluoroquinolone antibiotic;macrolide antibiotic;monobactam;penam;penem;peptide antibiotic;phenicol antibiotic;sulfonamide antibiotic;tetracycline antibiotic
CP021112.1.region004	CP0211120038	ARO:3000378|MexB|AAA74437.1	9.58e-115	376	efflux pump	aminocoumarin antibiotic;carbapenem;cephalosporin;cephamycin;diaminopyrimidine antibiotic;fluoroquinolone antibiotic;macrolide antibiotic;monobactam;penam;penem;peptide antibiotic;phenicol antibiotic;sulfonamide antibiotic;tetracycline antibiotic
CP021333.1.region004	CP0213330003	ARO:3000378|MexB|AAA74437.1	1.04e-69	249	efflux pump	aminocoumarin antibiotic;carbapenem;cephalosporin;cephamycin;diaminopyrimidine antibiotic;fluoroquinolone antibiotic;macrolide antibiotic;monobactam;penam;penem;peptide antibiotic;phenicol antibiotic;sulfonamide antibiotic;tetracycline antibiotic
CP021647.1.region003	CP0216470025	ARO:3000378|MexB|AAA74437.1	2.49e-31	129	efflux pump	aminocoumarin antibiotic;carbapenem;cephalosporin;cephamycin;diaminopyrimidine antibiotic;fluoroquinolone antibiotic;macrolide antibiotic;monobactam;penam;penem;peptide antibiotic;phenicol antibiotic;sulfonamide antibiotic;tetracycline antibiotic
CP022192.1.region001	CP0221920022	ARO:3000378|MexB|AAA74437.1	1.27e-50	191	efflux pump	aminocoumarin antibiotic;carbapenem;cephalosporin;cephamycin;diaminopyrimidine antibiotic;fluoroquinolone antibiotic;macrolide antibiotic;monobactam;penam;penem;peptide antibiotic;phenicol antibiotic;sulfonamide antibiotic;tetracycline antibiotic
CP022272.1.region004	CP0222720031	ARO:3000378|MexB|AAA74437.1	8.55e-53	198	efflux pump	aminocoumarin antibiotic;carbapenem;cephalosporin;cephamycin;diaminopyrimidine antibiotic;fluoroquinolone antibiotic;macrolide antibiotic;monobactam;penam;penem;peptide antibiotic;phenicol antibiotic;sulfonamide antibiotic;tetracycline antibiotic
CP022525.1.region005	CP0225250004	ARO:3000378|MexB|AAA74437.1	1.45e-147	464	efflux pump	aminocoumarin antibiotic;carbapenem;cephalosporin;cephamycin;diaminopyrimidine antibiotic;fluoroquinolone antibiotic;macrolide antibiotic;monobactam;penam;penem;peptide antibiotic;phenicol antibiotic;sulfonamide antibiotic;tetracycline antibiotic
CP022525.1.region008	CP0225250014	ARO:3000378|MexB|AAA74437.1	7.66e-112	369	efflux pump	aminocoumarin antibiotic;carbapenem;cephalosporin;cephamycin;diaminopyrimidine antibiotic;fluoroquinolone antibiotic;macrolide antibiotic;monobactam;penam;penem;peptide antibiotic;phenicol antibiotic;sulfonamide antibiotic;tetracycline antibiotic
CP022526.1.region011	CP0225260013	ARO:3000378|MexB|AAA74437.1	7.66e-112	369	efflux pump	aminocoumarin antibiotic;carbapenem;cephalosporin;cephamycin;diaminopyrimidine antibiotic;fluoroquinolone antibiotic;macrolide antibiotic;monobactam;penam;penem;peptide antibiotic;phenicol antibiotic;sulfonamide antibiotic;tetracycline antibiotic
CP022526.1.region007	CP0225260045	ARO:3000378|MexB|AAA74437.1	1.45e-147	464	efflux pump	aminocoumarin antibiotic;carbapenem;cephalosporin;cephamycin;diaminopyrimidine antibiotic;fluoroquinolone antibiotic;macrolide antibiotic;monobactam;penam;penem;peptide antibiotic;phenicol antibiotic;sulfonamide antibiotic;tetracycline antibiotic
CP022957.1.region003	CP0229570019	ARO:3000378|MexB|AAA74437.1	9.82e-53	198	efflux pump	aminocoumarin antibiotic;carbapenem;cephalosporin;cephamycin;diaminopyrimidine antibiotic;fluoroquinolone antibiotic;macrolide antibiotic;monobactam;penam;penem;peptide antibiotic;phenicol antibiotic;sulfonamide antibiotic;tetracycline antibiotic
CP023054.1.region001	CP0230540034	ARO:3000378|MexB|AAA74437.1	4.23e-54	202	efflux pump	aminocoumarin antibiotic;carbapenem;cephalosporin;cephamycin;diaminopyrimidine antibiotic;fluoroquinolone antibiotic;macrolide antibiotic;monobactam;penam;penem;peptide antibiotic;phenicol antibiotic;sulfonamide antibiotic;tetracycline antibiotic
CP024199.1.region005	CP0241990031	ARO:3000378|MexB|AAA74437.1	2.21e-38	152	efflux pump	aminocoumarin antibiotic;carbapenem;cephalosporin;cephamycin;diaminopyrimidine antibiotic;fluoroquinolone antibiotic;macrolide antibiotic;monobactam;penam;penem;peptide antibiotic;phenicol antibiotic;sulfonamide antibiotic;tetracycline antibiotic
CP025119.1.region002	CP0251190001	ARO:3000377|MexA|AAG03814.1	4.47e-33	124	efflux pump	aminocoumarin antibiotic;carbapenem;cephalosporin;cephamycin;diaminopyrimidine antibiotic;fluoroquinolone antibiotic;macrolide antibiotic;monobactam;penam;penem;peptide antibiotic;phenicol antibiotic;sulfonamide antibiotic;tetracycline antibiotic
CP025119.1.region003	CP0251190018	ARO:3000378|MexB|AAA74437.1	4.13e-63	231	efflux pump	aminocoumarin antibiotic;carbapenem;cephalosporin;cephamycin;diaminopyrimidine antibiotic;fluoroquinolone antibiotic;macrolide antibiotic;monobactam;penam;penem;peptide antibiotic;phenicol antibiotic;sulfonamide antibiotic;tetracycline antibiotic
CP026530.1.region002	CP0265300007	ARO:3000378|MexB|AAA74437.1	3.14e-31	129	efflux pump	aminocoumarin antibiotic;carbapenem;cephalosporin;cephamycin;diaminopyrimidine antibiotic;fluoroquinolone antibiotic;macrolide antibiotic;monobactam;penam;penem;peptide antibiotic;phenicol antibiotic;sulfonamide antibiotic;tetracycline antibiotic
CP027432.2.region002	CP0274320027	ARO:3000378|MexB|AAA74437.1	4.21e-33	135	efflux pump	aminocoumarin antibiotic;carbapenem;cephalosporin;cephamycin;diaminopyrimidine antibiotic;fluoroquinolone antibiotic;macrolide antibiotic;monobactam;penam;penem;peptide antibiotic;phenicol antibiotic;sulfonamide antibiotic;tetracycline antibiotic
CP027772.1.region003	CP0277720032	ARO:3000378|MexB|AAA74437.1	8.07e-52	195	efflux pump	aminocoumarin antibiotic;carbapenem;cephalosporin;cephamycin;diaminopyrimidine antibiotic;fluoroquinolone antibiotic;macrolide antibiotic;monobactam;penam;penem;peptide antibiotic;phenicol antibiotic;sulfonamide antibiotic;tetracycline antibiotic
CP027796.1.region002	CP0277960033	ARO:3000378|MexB|AAA74437.1	0	1218	efflux pump	aminocoumarin antibiotic;carbapenem;cephalosporin;cephamycin;diaminopyrimidine antibiotic;fluoroquinolone antibiotic;macrolide antibiotic;monobactam;penam;penem;peptide antibiotic;phenicol antibiotic;sulfonamide antibiotic;tetracycline antibiotic
CP027798.1.region003	CP0277980003	ARO:3000378|MexB|AAA74437.1	0	1218	efflux pump	aminocoumarin antibiotic;carbapenem;cephalosporin;cephamycin;diaminopyrimidine antibiotic;fluoroquinolone antibiotic;macrolide antibiotic;monobactam;penam;penem;peptide antibiotic;phenicol antibiotic;sulfonamide antibiotic;tetracycline antibiotic
CP028960.1.region005	CP0289600021	ARO:3000378|MexB|AAA74437.1	1.17e-53	201	efflux pump	aminocoumarin antibiotic;carbapenem;cephalosporin;cephamycin;diaminopyrimidine antibiotic;fluoroquinolone antibiotic;macrolide antibiotic;monobactam;penam;penem;peptide antibiotic;phenicol antibiotic;sulfonamide antibiotic;tetracycline antibiotic
CP029064.1.region005	CP0290640022	ARO:3000378|MexB|AAA74437.1	2.96e-34	139	efflux pump	aminocoumarin antibiotic;carbapenem;cephalosporin;cephamycin;diaminopyrimidine antibiotic;fluoroquinolone antibiotic;macrolide antibiotic;monobactam;penam;penem;peptide antibiotic;phenicol antibiotic;sulfonamide antibiotic;tetracycline antibiotic
CP029495.1.region008	CP0294950024	ARO:3000378|MexB|AAA74437.1	0	1098	efflux pump	aminocoumarin antibiotic;carbapenem;cephalosporin;cephamycin;diaminopyrimidine antibiotic;fluoroquinolone antibiotic;macrolide antibiotic;monobactam;penam;penem;peptide antibiotic;phenicol antibiotic;sulfonamide antibiotic;tetracycline antibiotic
CP029803.1.region003	CP0298030021	ARO:3000378|MexB|AAA74437.1	1.38e-41	162	efflux pump	aminocoumarin antibiotic;carbapenem;cephalosporin;cephamycin;diaminopyrimidine antibiotic;fluoroquinolone antibiotic;macrolide antibiotic;monobactam;penam;penem;peptide antibiotic;phenicol antibiotic;sulfonamide antibiotic;tetracycline antibiotic
CP029843.1.region008	CP0298430028	ARO:3000378|MexB|AAA74437.1	8.66e-98	330	efflux pump	aminocoumarin antibiotic;carbapenem;cephalosporin;cephamycin;diaminopyrimidine antibiotic;fluoroquinolone antibiotic;macrolide antibiotic;monobactam;penam;penem;peptide antibiotic;phenicol antibiotic;sulfonamide antibiotic;tetracycline antibiotic
CP029843.1.region008	CP0298430029	ARO:3000378|MexB|AAA74437.1	3.59e-116	381	efflux pump	aminocoumarin antibiotic;carbapenem;cephalosporin;cephamycin;diaminopyrimidine antibiotic;fluoroquinolone antibiotic;macrolide antibiotic;monobactam;penam;penem;peptide antibiotic;phenicol antibiotic;sulfonamide antibiotic;tetracycline antibiotic
CP029843.1.region008	CP0298430034	ARO:3000378|MexB|AAA74437.1	0	1026	efflux pump	aminocoumarin antibiotic;carbapenem;cephalosporin;cephamycin;diaminopyrimidine antibiotic;fluoroquinolone antibiotic;macrolide antibiotic;monobactam;penam;penem;peptide antibiotic;phenicol antibiotic;sulfonamide antibiotic;tetracycline antibiotic
CP030032.1.region005	CP0300320024	ARO:3000378|MexB|AAA74437.1	9.62e-65	234	efflux pump	aminocoumarin antibiotic;carbapenem;cephalosporin;cephamycin;diaminopyrimidine antibiotic;fluoroquinolone antibiotic;macrolide antibiotic;monobactam;penam;penem;peptide antibiotic;phenicol antibiotic;sulfonamide antibiotic;tetracycline antibiotic
CP030092.1.region003	CP0300920012	ARO:3000378|MexB|AAA74437.1	1.1e-54	204	efflux pump	aminocoumarin antibiotic;carbapenem;cephalosporin;cephamycin;diaminopyrimidine antibiotic;fluoroquinolone antibiotic;macrolide antibiotic;monobactam;penam;penem;peptide antibiotic;phenicol antibiotic;sulfonamide antibiotic;tetracycline antibiotic
CP030092.1.region005	CP0300920021	ARO:3000378|MexB|AAA74437.1	0	978	efflux pump	aminocoumarin antibiotic;carbapenem;cephalosporin;cephamycin;diaminopyrimidine antibiotic;fluoroquinolone antibiotic;macrolide antibiotic;monobactam;penam;penem;peptide antibiotic;phenicol antibiotic;sulfonamide antibiotic;tetracycline antibiotic
CP030104.1.region002	CP0301040002	ARO:3000378|MexB|AAA74437.1	2.06e-55	207	efflux pump	aminocoumarin antibiotic;carbapenem;cephalosporin;cephamycin;diaminopyrimidine antibiotic;fluoroquinolone antibiotic;macrolide antibiotic;monobactam;penam;penem;peptide antibiotic;phenicol antibiotic;sulfonamide antibiotic;tetracycline antibiotic
CP031010.1.region005	CP0310100006	ARO:3000377|MexA|AAG03814.1	5.58e-35	129	efflux pump	aminocoumarin antibiotic;carbapenem;cephalosporin;cephamycin;diaminopyrimidine antibiotic;fluoroquinolone antibiotic;macrolide antibiotic;monobactam;penam;penem;peptide antibiotic;phenicol antibiotic;sulfonamide antibiotic;tetracycline antibiotic
CP031010.1.region005	CP0310100007	ARO:3000378|MexB|AAA74437.1	0	710	efflux pump	aminocoumarin antibiotic;carbapenem;cephalosporin;cephamycin;diaminopyrimidine antibiotic;fluoroquinolone antibiotic;macrolide antibiotic;monobactam;penam;penem;peptide antibiotic;phenicol antibiotic;sulfonamide antibiotic;tetracycline antibiotic
CP031146.1.region003	CP0311460001	ARO:3000378|MexB|AAA74437.1	0	1123	efflux pump	aminocoumarin antibiotic;carbapenem;cephalosporin;cephamycin;diaminopyrimidine antibiotic;fluoroquinolone antibiotic;macrolide antibiotic;monobactam;penam;penem;peptide antibiotic;phenicol antibiotic;sulfonamide antibiotic;tetracycline antibiotic
CP031146.1.region002	CP0311460011	ARO:3000378|MexB|AAA74437.1	0	805	efflux pump	aminocoumarin antibiotic;carbapenem;cephalosporin;cephamycin;diaminopyrimidine antibiotic;fluoroquinolone antibiotic;macrolide antibiotic;monobactam;penam;penem;peptide antibiotic;phenicol antibiotic;sulfonamide antibiotic;tetracycline antibiotic
CP031472.1.region003	CP0314720024	ARO:3000378|MexB|AAA74437.1	1.21e-54	204	efflux pump	aminocoumarin antibiotic;carbapenem;cephalosporin;cephamycin;diaminopyrimidine antibiotic;fluoroquinolone antibiotic;macrolide antibiotic;monobactam;penam;penem;peptide antibiotic;phenicol antibiotic;sulfonamide antibiotic;tetracycline antibiotic
CP031759.1.region002	CP0317590004	ARO:3000378|MexB|AAA74437.1	8.06e-126	406	efflux pump	aminocoumarin antibiotic;carbapenem;cephalosporin;cephamycin;diaminopyrimidine antibiotic;fluoroquinolone antibiotic;macrolide antibiotic;monobactam;penam;penem;peptide antibiotic;phenicol antibiotic;sulfonamide antibiotic;tetracycline antibiotic
CP032050.1.region001	CP0320500010	ARO:3000378|MexB|AAA74437.1	1.52e-53	202	efflux pump	aminocoumarin antibiotic;carbapenem;cephalosporin;cephamycin;diaminopyrimidine antibiotic;fluoroquinolone antibiotic;macrolide antibiotic;monobactam;penam;penem;peptide antibiotic;phenicol antibiotic;sulfonamide antibiotic;tetracycline antibiotic
CP032096.1.region002	CP0320960002	ARO:3000378|MexB|AAA74437.1	3.66e-45	174	efflux pump	aminocoumarin antibiotic;carbapenem;cephalosporin;cephamycin;diaminopyrimidine antibiotic;fluoroquinolone antibiotic;macrolide antibiotic;monobactam;penam;penem;peptide antibiotic;phenicol antibiotic;sulfonamide antibiotic;tetracycline antibiotic
CP032125.1.region001	CP0321250013	ARO:3000378|MexB|AAA74437.1	2.75e-31	129	efflux pump	aminocoumarin antibiotic;carbapenem;cephalosporin;cephamycin;diaminopyrimidine antibiotic;fluoroquinolone antibiotic;macrolide antibiotic;monobactam;penam;penem;peptide antibiotic;phenicol antibiotic;sulfonamide antibiotic;tetracycline antibiotic
CP032363.1.region002	CP0323630040	ARO:3000378|MexB|AAA74437.1	2.66e-49	187	efflux pump	aminocoumarin antibiotic;carbapenem;cephalosporin;cephamycin;diaminopyrimidine antibiotic;fluoroquinolone antibiotic;macrolide antibiotic;monobactam;penam;penem;peptide antibiotic;phenicol antibiotic;sulfonamide antibiotic;tetracycline antibiotic
CP033577.1.region003	CP0335770013	ARO:3000378|MexB|AAA74437.1	8.04e-44	169	efflux pump	aminocoumarin antibiotic;carbapenem;cephalosporin;cephamycin;diaminopyrimidine antibiotic;fluoroquinolone antibiotic;macrolide antibiotic;monobactam;penam;penem;peptide antibiotic;phenicol antibiotic;sulfonamide antibiotic;tetracycline antibiotic
CP033577.1.region001	CP0335770028	ARO:3000378|MexB|AAA74437.1	1.24e-37	150	efflux pump	aminocoumarin antibiotic;carbapenem;cephalosporin;cephamycin;diaminopyrimidine antibiotic;fluoroquinolone antibiotic;macrolide antibiotic;monobactam;penam;penem;peptide antibiotic;phenicol antibiotic;sulfonamide antibiotic;tetracycline antibiotic
CP034970.1.region003	CP0349700011	ARO:3000378|MexB|AAA74437.1	3.53e-56	208	efflux pump	aminocoumarin antibiotic;carbapenem;cephalosporin;cephamycin;diaminopyrimidine antibiotic;fluoroquinolone antibiotic;macrolide antibiotic;monobactam;penam;penem;peptide antibiotic;phenicol antibiotic;sulfonamide antibiotic;tetracycline antibiotic
CP035033.1.region001	CP0350330007	ARO:3000378|MexB|AAA74437.1	6.66e-68	244	efflux pump	aminocoumarin antibiotic;carbapenem;cephalosporin;cephamycin;diaminopyrimidine antibiotic;fluoroquinolone antibiotic;macrolide antibiotic;monobactam;penam;penem;peptide antibiotic;phenicol antibiotic;sulfonamide antibiotic;tetracycline antibiotic
CP035928.1.region001	CP0359280001	ARO:3000378|MexB|AAA74437.1	4.1e-48	183	efflux pump	aminocoumarin antibiotic;carbapenem;cephalosporin;cephamycin;diaminopyrimidine antibiotic;fluoroquinolone antibiotic;macrolide antibiotic;monobactam;penam;penem;peptide antibiotic;phenicol antibiotic;sulfonamide antibiotic;tetracycline antibiotic
CP036319.1.region002	CP0363190035	ARO:3000378|MexB|AAA74437.1	0	757	efflux pump	aminocoumarin antibiotic;carbapenem;cephalosporin;cephamycin;diaminopyrimidine antibiotic;fluoroquinolone antibiotic;macrolide antibiotic;monobactam;penam;penem;peptide antibiotic;phenicol antibiotic;sulfonamide antibiotic;tetracycline antibiotic
CP036426.1.region004	CP0364260002	ARO:3000378|MexB|AAA74437.1	0	738	efflux pump	aminocoumarin antibiotic;carbapenem;cephalosporin;cephamycin;diaminopyrimidine antibiotic;fluoroquinolone antibiotic;macrolide antibiotic;monobactam;penam;penem;peptide antibiotic;phenicol antibiotic;sulfonamide antibiotic;tetracycline antibiotic
CP039700.1.region005	CP0397000013	ARO:3000378|MexB|AAA74437.1	9.85e-40	156	efflux pump	aminocoumarin antibiotic;carbapenem;cephalosporin;cephamycin;diaminopyrimidine antibiotic;fluoroquinolone antibiotic;macrolide antibiotic;monobactam;penam;penem;peptide antibiotic;phenicol antibiotic;sulfonamide antibiotic;tetracycline antibiotic
CP040263.1.region003	CP0402630032	ARO:3000378|MexB|AAA74437.1	1.32e-52	197	efflux pump	aminocoumarin antibiotic;carbapenem;cephalosporin;cephamycin;diaminopyrimidine antibiotic;fluoroquinolone antibiotic;macrolide antibiotic;monobactam;penam;penem;peptide antibiotic;phenicol antibiotic;sulfonamide antibiotic;tetracycline antibiotic
CP040269.1.region002	CP0402690034	ARO:3000378|MexB|AAA74437.1	5.57e-52	195	efflux pump	aminocoumarin antibiotic;carbapenem;cephalosporin;cephamycin;diaminopyrimidine antibiotic;fluoroquinolone antibiotic;macrolide antibiotic;monobactam;penam;penem;peptide antibiotic;phenicol antibiotic;sulfonamide antibiotic;tetracycline antibiotic
CP040443.1.region002	CP0404430005	ARO:3000378|MexB|AAA74437.1	1.65e-51	194	efflux pump	aminocoumarin antibiotic;carbapenem;cephalosporin;cephamycin;diaminopyrimidine antibiotic;fluoroquinolone antibiotic;macrolide antibiotic;monobactam;penam;penem;peptide antibiotic;phenicol antibiotic;sulfonamide antibiotic;tetracycline antibiotic
CP040656.1.region009	CP0406560001	ARO:3000378|MexB|AAA74437.1	3.75e-72	258	efflux pump	aminocoumarin antibiotic;carbapenem;cephalosporin;cephamycin;diaminopyrimidine antibiotic;fluoroquinolone antibiotic;macrolide antibiotic;monobactam;penam;penem;peptide antibiotic;phenicol antibiotic;sulfonamide antibiotic;tetracycline antibiotic
CP040656.1.region004	CP0406560025	ARO:3000378|MexB|AAA74437.1	1.17e-90	310	efflux pump	aminocoumarin antibiotic;carbapenem;cephalosporin;cephamycin;diaminopyrimidine antibiotic;fluoroquinolone antibiotic;macrolide antibiotic;monobactam;penam;penem;peptide antibiotic;phenicol antibiotic;sulfonamide antibiotic;tetracycline antibiotic
CP041025.1.region007	CP0410250002	ARO:3000378|MexB|AAA74437.1	5e-64	233	efflux pump	aminocoumarin antibiotic;carbapenem;cephalosporin;cephamycin;diaminopyrimidine antibiotic;fluoroquinolone antibiotic;macrolide antibiotic;monobactam;penam;penem;peptide antibiotic;phenicol antibiotic;sulfonamide antibiotic;tetracycline antibiotic
CP041025.1.region004	CP0410250012	ARO:3000378|MexB|AAA74437.1	2.64e-57	212	efflux pump	aminocoumarin antibiotic;carbapenem;cephalosporin;cephamycin;diaminopyrimidine antibiotic;fluoroquinolone antibiotic;macrolide antibiotic;monobactam;penam;penem;peptide antibiotic;phenicol antibiotic;sulfonamide antibiotic;tetracycline antibiotic
CP041153.1.region004	CP0411530031	ARO:3000378|MexB|AAA74437.1	6.68e-53	198	efflux pump	aminocoumarin antibiotic;carbapenem;cephalosporin;cephamycin;diaminopyrimidine antibiotic;fluoroquinolone antibiotic;macrolide antibiotic;monobactam;penam;penem;peptide antibiotic;phenicol antibiotic;sulfonamide antibiotic;tetracycline antibiotic
CP041185.1.region001	CP0411850013	ARO:3000378|MexB|AAA74437.1	1.24e-32	134	efflux pump	aminocoumarin antibiotic;carbapenem;cephalosporin;cephamycin;diaminopyrimidine antibiotic;fluoroquinolone antibiotic;macrolide antibiotic;monobactam;penam;penem;peptide antibiotic;phenicol antibiotic;sulfonamide antibiotic;tetracycline antibiotic
CP041332.1.region002	CP0413320012	ARO:3000378|MexB|AAA74437.1	8.13e-39	154	efflux pump	aminocoumarin antibiotic;carbapenem;cephalosporin;cephamycin;diaminopyrimidine antibiotic;fluoroquinolone antibiotic;macrolide antibiotic;monobactam;penam;penem;peptide antibiotic;phenicol antibiotic;sulfonamide antibiotic;tetracycline antibiotic
CP041386.1.region001	CP0413860001	ARO:3000378|MexB|AAA74437.1	1.48e-93	317	efflux pump	aminocoumarin antibiotic;carbapenem;cephalosporin;cephamycin;diaminopyrimidine antibiotic;fluoroquinolone antibiotic;macrolide antibiotic;monobactam;penam;penem;peptide antibiotic;phenicol antibiotic;sulfonamide antibiotic;tetracycline antibiotic
CP041614.1.region009	CP0416140011	ARO:3000378|MexB|AAA74437.1	2.08e-149	469	efflux pump	aminocoumarin antibiotic;carbapenem;cephalosporin;cephamycin;diaminopyrimidine antibiotic;fluoroquinolone antibiotic;macrolide antibiotic;monobactam;penam;penem;peptide antibiotic;phenicol antibiotic;sulfonamide antibiotic;tetracycline antibiotic
CP041660.1.region001	CP0416600021	ARO:3000378|MexB|AAA74437.1	4.59e-48	183	efflux pump	aminocoumarin antibiotic;carbapenem;cephalosporin;cephamycin;diaminopyrimidine antibiotic;fluoroquinolone antibiotic;macrolide antibiotic;monobactam;penam;penem;peptide antibiotic;phenicol antibiotic;sulfonamide antibiotic;tetracycline antibiotic
CP041783.1.region001	CP0417830020	ARO:3000378|MexB|AAA74437.1	0	801	efflux pump	aminocoumarin antibiotic;carbapenem;cephalosporin;cephamycin;diaminopyrimidine antibiotic;fluoroquinolone antibiotic;macrolide antibiotic;monobactam;penam;penem;peptide antibiotic;phenicol antibiotic;sulfonamide antibiotic;tetracycline antibiotic
CP042994.1.region001	CP0429940004	ARO:3000378|MexB|AAA74437.1	0	985	efflux pump	aminocoumarin antibiotic;carbapenem;cephalosporin;cephamycin;diaminopyrimidine antibiotic;fluoroquinolone antibiotic;macrolide antibiotic;monobactam;penam;penem;peptide antibiotic;phenicol antibiotic;sulfonamide antibiotic;tetracycline antibiotic
CP042994.1.region003	CP0429940019	ARO:3000378|MexB|AAA74437.1	0	897	efflux pump	aminocoumarin antibiotic;carbapenem;cephalosporin;cephamycin;diaminopyrimidine antibiotic;fluoroquinolone antibiotic;macrolide antibiotic;monobactam;penam;penem;peptide antibiotic;phenicol antibiotic;sulfonamide antibiotic;tetracycline antibiotic
CP043056.1.region015	CP0430560020	ARO:3000378|MexB|AAA74437.1	1.71e-35	142	efflux pump	aminocoumarin antibiotic;carbapenem;cephalosporin;cephamycin;diaminopyrimidine antibiotic;fluoroquinolone antibiotic;macrolide antibiotic;monobactam;penam;penem;peptide antibiotic;phenicol antibiotic;sulfonamide antibiotic;tetracycline antibiotic
CP044399.1.region006	CP0443990006	ARO:3000378|MexB|AAA74437.1	2.77e-32	132	efflux pump	aminocoumarin antibiotic;carbapenem;cephalosporin;cephamycin;diaminopyrimidine antibiotic;fluoroquinolone antibiotic;macrolide antibiotic;monobactam;penam;penem;peptide antibiotic;phenicol antibiotic;sulfonamide antibiotic;tetracycline antibiotic
CP045338.1.region001	CP0453380012	ARO:3000378|MexB|AAA74437.1	2.09e-55	206	efflux pump	aminocoumarin antibiotic;carbapenem;cephalosporin;cephamycin;diaminopyrimidine antibiotic;fluoroquinolone antibiotic;macrolide antibiotic;monobactam;penam;penem;peptide antibiotic;phenicol antibiotic;sulfonamide antibiotic;tetracycline antibiotic
CP045349.1.region004	CP0453490033	ARO:3000378|MexB|AAA74437.1	2.38e-37	149	efflux pump	aminocoumarin antibiotic;carbapenem;cephalosporin;cephamycin;diaminopyrimidine antibiotic;fluoroquinolone antibiotic;macrolide antibiotic;monobactam;penam;penem;peptide antibiotic;phenicol antibiotic;sulfonamide antibiotic;tetracycline antibiotic
CP045355.1.region005	CP0453550024	ARO:3000378|MexB|AAA74437.1	1.62e-56	209	efflux pump	aminocoumarin antibiotic;carbapenem;cephalosporin;cephamycin;diaminopyrimidine antibiotic;fluoroquinolone antibiotic;macrolide antibiotic;monobactam;penam;penem;peptide antibiotic;phenicol antibiotic;sulfonamide antibiotic;tetracycline antibiotic
CP045359.1.region004	CP0453590033	ARO:3000378|MexB|AAA74437.1	2.38e-37	149	efflux pump	aminocoumarin antibiotic;carbapenem;cephalosporin;cephamycin;diaminopyrimidine antibiotic;fluoroquinolone antibiotic;macrolide antibiotic;monobactam;penam;penem;peptide antibiotic;phenicol antibiotic;sulfonamide antibiotic;tetracycline antibiotic
CP046065.1.region005	CP0460650024	ARO:3000378|MexB|AAA74437.1	1.62e-56	209	efflux pump	aminocoumarin antibiotic;carbapenem;cephalosporin;cephamycin;diaminopyrimidine antibiotic;fluoroquinolone antibiotic;macrolide antibiotic;monobactam;penam;penem;peptide antibiotic;phenicol antibiotic;sulfonamide antibiotic;tetracycline antibiotic
CP046162.1.region005	CP0461620024	ARO:3000378|MexB|AAA74437.1	1.62e-56	209	efflux pump	aminocoumarin antibiotic;carbapenem;cephalosporin;cephamycin;diaminopyrimidine antibiotic;fluoroquinolone antibiotic;macrolide antibiotic;monobactam;penam;penem;peptide antibiotic;phenicol antibiotic;sulfonamide antibiotic;tetracycline antibiotic
CP046535.1.region004	CP0465350034	ARO:3000378|MexB|AAA74437.1	2.56e-65	236	efflux pump	aminocoumarin antibiotic;carbapenem;cephalosporin;cephamycin;diaminopyrimidine antibiotic;fluoroquinolone antibiotic;macrolide antibiotic;monobactam;penam;penem;peptide antibiotic;phenicol antibiotic;sulfonamide antibiotic;tetracycline antibiotic
CP047026.1.region002	CP0470260001	ARO:3000378|MexB|AAA74437.1	0	772	efflux pump	aminocoumarin antibiotic;carbapenem;cephalosporin;cephamycin;diaminopyrimidine antibiotic;fluoroquinolone antibiotic;macrolide antibiotic;monobactam;penam;penem;peptide antibiotic;phenicol antibiotic;sulfonamide antibiotic;tetracycline antibiotic
CP047027.1.region001	CP0470270002	ARO:3000378|MexB|AAA74437.1	2.7e-62	228	efflux pump	aminocoumarin antibiotic;carbapenem;cephalosporin;cephamycin;diaminopyrimidine antibiotic;fluoroquinolone antibiotic;macrolide antibiotic;monobactam;penam;penem;peptide antibiotic;phenicol antibiotic;sulfonamide antibiotic;tetracycline antibiotic
CP048685.1.region006	CP0486850009	ARO:3000378|MexB|AAA74437.1	0	832	efflux pump	aminocoumarin antibiotic;carbapenem;cephalosporin;cephamycin;diaminopyrimidine antibiotic;fluoroquinolone antibiotic;macrolide antibiotic;monobactam;penam;penem;peptide antibiotic;phenicol antibiotic;sulfonamide antibiotic;tetracycline antibiotic
CP049616.1.region004	CP0496160002	ARO:3000378|MexB|AAA74437.1	3.02e-58	216	efflux pump	aminocoumarin antibiotic;carbapenem;cephalosporin;cephamycin;diaminopyrimidine antibiotic;fluoroquinolone antibiotic;macrolide antibiotic;monobactam;penam;penem;peptide antibiotic;phenicol antibiotic;sulfonamide antibiotic;tetracycline antibiotic
CP072852.1.region004	CP0728520004	ARO:3000378|MexB|AAA74437.1	1.03e-47	182	efflux pump	aminocoumarin antibiotic;carbapenem;cephalosporin;cephamycin;diaminopyrimidine antibiotic;fluoroquinolone antibiotic;macrolide antibiotic;monobactam;penam;penem;peptide antibiotic;phenicol antibiotic;sulfonamide antibiotic;tetracycline antibiotic
CR354531.1.region001	CR3545310012	ARO:3000378|MexB|AAA74437.1	2.56e-35	142	efflux pump	aminocoumarin antibiotic;carbapenem;cephalosporin;cephamycin;diaminopyrimidine antibiotic;fluoroquinolone antibiotic;macrolide antibiotic;monobactam;penam;penem;peptide antibiotic;phenicol antibiotic;sulfonamide antibiotic;tetracycline antibiotic
FO203503.1.region002	FO2035030034	ARO:3000378|MexB|AAA74437.1	8.85e-48	182	efflux pump	aminocoumarin antibiotic;carbapenem;cephalosporin;cephamycin;diaminopyrimidine antibiotic;fluoroquinolone antibiotic;macrolide antibiotic;monobactam;penam;penem;peptide antibiotic;phenicol antibiotic;sulfonamide antibiotic;tetracycline antibiotic
FO203522.1.region002	FO2035220044	ARO:3000378|MexB|AAA74437.1	6.05e-38	151	efflux pump	aminocoumarin antibiotic;carbapenem;cephalosporin;cephamycin;diaminopyrimidine antibiotic;fluoroquinolone antibiotic;macrolide antibiotic;monobactam;penam;penem;peptide antibiotic;phenicol antibiotic;sulfonamide antibiotic;tetracycline antibiotic
LN554852.1.region008	LN5548520006	ARO:3000378|MexB|AAA74437.1	1.39e-33	137	efflux pump	aminocoumarin antibiotic;carbapenem;cephalosporin;cephamycin;diaminopyrimidine antibiotic;fluoroquinolone antibiotic;macrolide antibiotic;monobactam;penam;penem;peptide antibiotic;phenicol antibiotic;sulfonamide antibiotic;tetracycline antibiotic
LR136958.1.region001	LR1369580017	ARO:3000378|MexB|AAA74437.1	9.26e-53	198	efflux pump	aminocoumarin antibiotic;carbapenem;cephalosporin;cephamycin;diaminopyrimidine antibiotic;fluoroquinolone antibiotic;macrolide antibiotic;monobactam;penam;penem;peptide antibiotic;phenicol antibiotic;sulfonamide antibiotic;tetracycline antibiotic
LS999833.1.region004	LS9998330006	ARO:3000378|MexB|AAA74437.1	3.48e-32	132	efflux pump	aminocoumarin antibiotic;carbapenem;cephalosporin;cephamycin;diaminopyrimidine antibiotic;fluoroquinolone antibiotic;macrolide antibiotic;monobactam;penam;penem;peptide antibiotic;phenicol antibiotic;sulfonamide antibiotic;tetracycline antibiotic
LT629794.1.region001	LT6297940008	ARO:3000378|MexB|AAA74437.1	6.38e-60	221	efflux pump	aminocoumarin antibiotic;carbapenem;cephalosporin;cephamycin;diaminopyrimidine antibiotic;fluoroquinolone antibiotic;macrolide antibiotic;monobactam;penam;penem;peptide antibiotic;phenicol antibiotic;sulfonamide antibiotic;tetracycline antibiotic
LT838813.1.region007	LT8388130009	ARO:3000378|MexB|AAA74437.1	4.24e-99	333	efflux pump	aminocoumarin antibiotic;carbapenem;cephalosporin;cephamycin;diaminopyrimidine antibiotic;fluoroquinolone antibiotic;macrolide antibiotic;monobactam;penam;penem;peptide antibiotic;phenicol antibiotic;sulfonamide antibiotic;tetracycline antibiotic
CP000789.1.region002	CP0007890002	ARO:3005059|LptD|AIA35096.1	1.46e-169	505	efflux pump	aminocoumarin antibiotic;carbapenem;peptide antibiotic;rifamycin antibiotic
CP001805.1.region001	CP0018050019	ARO:3005059|LptD|AIA35096.1	7.26e-169	504	efflux pump	aminocoumarin antibiotic;carbapenem;peptide antibiotic;rifamycin antibiotic
CP003241.1.region001	CP0032410002	ARO:3005059|LptD|AIA35096.1	3.36e-170	507	efflux pump	aminocoumarin antibiotic;carbapenem;peptide antibiotic;rifamycin antibiotic
CP003972.1.region001	CP0039720002	ARO:3005059|LptD|AIA35096.1	4.46e-165	492	efflux pump	aminocoumarin antibiotic;carbapenem;peptide antibiotic;rifamycin antibiotic
CP007004.1.region001	CP0070040002	ARO:3005059|LptD|AIA35096.1	1.82e-169	505	efflux pump	aminocoumarin antibiotic;carbapenem;peptide antibiotic;rifamycin antibiotic
CP009261.1.region001	CP0092610003	ARO:3005059|LptD|AIA35096.1	1.77e-161	484	efflux pump	aminocoumarin antibiotic;carbapenem;peptide antibiotic;rifamycin antibiotic
CP009467.2.region002	CP0094670002	ARO:3005059|LptD|AIA35096.1	5.65e-174	517	efflux pump	aminocoumarin antibiotic;carbapenem;peptide antibiotic;rifamycin antibiotic
CP009977.1.region003	CP0099770019	ARO:3005059|LptD|AIA35096.1	1.13e-170	508	efflux pump	aminocoumarin antibiotic;carbapenem;peptide antibiotic;rifamycin antibiotic
CP010883.1.region001	CP0108830002	ARO:3005059|LptD|AIA35096.1	1.33e-169	506	efflux pump	aminocoumarin antibiotic;carbapenem;peptide antibiotic;rifamycin antibiotic
CP013484.1.region003	CP0134840002	ARO:3005059|LptD|AIA35096.1	4.15e-169	504	efflux pump	aminocoumarin antibiotic;carbapenem;peptide antibiotic;rifamycin antibiotic
CP013826.1.region004	CP0138260019	ARO:3005059|LptD|AIA35096.1	4.76e-165	492	efflux pump	aminocoumarin antibiotic;carbapenem;peptide antibiotic;rifamycin antibiotic
CP014040.1.region001	CP0140400002	ARO:3005059|LptD|AIA35096.1	4.15e-169	504	efflux pump	aminocoumarin antibiotic;carbapenem;peptide antibiotic;rifamycin antibiotic
CP014053.1.region003	CP0140530002	ARO:3005059|LptD|AIA35096.1	2.78e-168	502	efflux pump	aminocoumarin antibiotic;carbapenem;peptide antibiotic;rifamycin antibiotic
CP014636.1.region002	CP0146360019	ARO:3005059|LptD|AIA35096.1	6.17e-162	486	efflux pump	aminocoumarin antibiotic;carbapenem;peptide antibiotic;rifamycin antibiotic
CP015512.1.region002	CP0155120003	ARO:3005059|LptD|AIA35096.1	2.99e-161	484	efflux pump	aminocoumarin antibiotic;carbapenem;peptide antibiotic;rifamycin antibiotic
CP016177.1.region001	CP0161770002	ARO:3005059|LptD|AIA35096.1	3.75e-147	449	efflux pump	aminocoumarin antibiotic;carbapenem;peptide antibiotic;rifamycin antibiotic
CP016224.1.region001	CP0162240001	ARO:3005059|LptD|AIA35096.1	4.15e-169	504	efflux pump	aminocoumarin antibiotic;carbapenem;peptide antibiotic;rifamycin antibiotic
CP016321.1.region002	CP0163210003	ARO:3005059|LptD|AIA35096.1	9.5e-164	490	efflux pump	aminocoumarin antibiotic;carbapenem;peptide antibiotic;rifamycin antibiotic
CP016345.1.region001	CP0163450002	ARO:3005059|LptD|AIA35096.1	1.13e-170	508	efflux pump	aminocoumarin antibiotic;carbapenem;peptide antibiotic;rifamycin antibiotic
CP016347.1.region001	CP0163470002	ARO:3005059|LptD|AIA35096.1	9.44e-171	508	efflux pump	aminocoumarin antibiotic;carbapenem;peptide antibiotic;rifamycin antibiotic
CP016349.1.region001	CP0163490002	ARO:3005059|LptD|AIA35096.1	2.98e-170	507	efflux pump	aminocoumarin antibiotic;carbapenem;peptide antibiotic;rifamycin antibiotic
CP016351.1.region002	CP0163510002	ARO:3005059|LptD|AIA35096.1	4.07e-170	507	efflux pump	aminocoumarin antibiotic;carbapenem;peptide antibiotic;rifamycin antibiotic
CP017889.1.region001	CP0178890002	ARO:3005059|LptD|AIA35096.1	4.15e-169	504	efflux pump	aminocoumarin antibiotic;carbapenem;peptide antibiotic;rifamycin antibiotic
CP017896.1.region001	CP0178960002	ARO:3005059|LptD|AIA35096.1	4.15e-169	504	efflux pump	aminocoumarin antibiotic;carbapenem;peptide antibiotic;rifamycin antibiotic
CP017899.1.region001	CP0178990002	ARO:3005059|LptD|AIA35096.1	4.15e-169	504	efflux pump	aminocoumarin antibiotic;carbapenem;peptide antibiotic;rifamycin antibiotic
CP017907.1.region001	CP0179070002	ARO:3005059|LptD|AIA35096.1	4.15e-169	504	efflux pump	aminocoumarin antibiotic;carbapenem;peptide antibiotic;rifamycin antibiotic
CP017911.1.region001	CP0179110002	ARO:3005059|LptD|AIA35096.1	4.15e-169	504	efflux pump	aminocoumarin antibiotic;carbapenem;peptide antibiotic;rifamycin antibiotic
CP017913.1.region001	CP0179130002	ARO:3005059|LptD|AIA35096.1	4.15e-169	504	efflux pump	aminocoumarin antibiotic;carbapenem;peptide antibiotic;rifamycin antibiotic
CP017916.1.region004	CP0179160021	ARO:3005059|LptD|AIA35096.1	2.76e-166	497	efflux pump	aminocoumarin antibiotic;carbapenem;peptide antibiotic;rifamycin antibiotic
CP017919.1.region003	CP0179190018	ARO:3005059|LptD|AIA35096.1	4.15e-169	504	efflux pump	aminocoumarin antibiotic;carbapenem;peptide antibiotic;rifamycin antibiotic
CP018308.1.region002	CP0183080002	ARO:3005059|LptD|AIA35096.1	1.53e-154	466	efflux pump	aminocoumarin antibiotic;carbapenem;peptide antibiotic;rifamycin antibiotic
CP018312.1.region002	CP0183120018	ARO:3005059|LptD|AIA35096.1	1.81e-171	511	efflux pump	aminocoumarin antibiotic;carbapenem;peptide antibiotic;rifamycin antibiotic
CP018680.2.region004	CP0186800002	ARO:3005059|LptD|AIA35096.1	5.65e-174	517	efflux pump	aminocoumarin antibiotic;carbapenem;peptide antibiotic;rifamycin antibiotic
CP019290.1.region002	CP0192900018	ARO:3005059|LptD|AIA35096.1	1.77e-161	484	efflux pump	aminocoumarin antibiotic;carbapenem;peptide antibiotic;rifamycin antibiotic
CP019634.1.region003	CP0196340018	ARO:3005059|LptD|AIA35096.1	3.28e-169	504	efflux pump	aminocoumarin antibiotic;carbapenem;peptide antibiotic;rifamycin antibiotic
CP019959.1.region002	CP0199590018	ARO:3005059|LptD|AIA35096.1	8.12e-171	509	efflux pump	aminocoumarin antibiotic;carbapenem;peptide antibiotic;rifamycin antibiotic
CP020034.1.region004	CP0200340018	ARO:3005059|LptD|AIA35096.1	4.76e-165	492	efflux pump	aminocoumarin antibiotic;carbapenem;peptide antibiotic;rifamycin antibiotic
CP020076.1.region005	CP0200760019	ARO:3005059|LptD|AIA35096.1	6.38e-169	504	efflux pump	aminocoumarin antibiotic;carbapenem;peptide antibiotic;rifamycin antibiotic
CP021145.1.region005	CP0211450019	ARO:3005059|LptD|AIA35096.1	3.28e-169	504	efflux pump	aminocoumarin antibiotic;carbapenem;peptide antibiotic;rifamycin antibiotic
CP025792.1.region003	CP0257920019	ARO:3005059|LptD|AIA35096.1	1.14e-174	518	efflux pump	aminocoumarin antibiotic;carbapenem;peptide antibiotic;rifamycin antibiotic
CP026315.1.region002	CP0263150020	ARO:3005059|LptD|AIA35096.1	5.43e-169	504	efflux pump	aminocoumarin antibiotic;carbapenem;peptide antibiotic;rifamycin antibiotic
CP026321.1.region005	CP0263210020	ARO:3005059|LptD|AIA35096.1	1.47e-170	508	efflux pump	aminocoumarin antibiotic;carbapenem;peptide antibiotic;rifamycin antibiotic
CP028141.1.region003	CP0281410019	ARO:3005059|LptD|AIA35096.1	1.27e-169	506	efflux pump	aminocoumarin antibiotic;carbapenem;peptide antibiotic;rifamycin antibiotic
CP028342.1.region003	CP0283420019	ARO:3005059|LptD|AIA35096.1	1.27e-169	506	efflux pump	aminocoumarin antibiotic;carbapenem;peptide antibiotic;rifamycin antibiotic
CP028943.1.region001	CP0289430002	ARO:3005059|LptD|AIA35096.1	1.13e-170	508	efflux pump	aminocoumarin antibiotic;carbapenem;peptide antibiotic;rifamycin antibiotic
CP030788.1.region001	CP0307880002	ARO:3005059|LptD|AIA35096.1	8.18e-169	503	efflux pump	aminocoumarin antibiotic;carbapenem;peptide antibiotic;rifamycin antibiotic
CP032093.1.region003	CP0320930019	ARO:3005059|LptD|AIA35096.1	1.62e-163	490	efflux pump	aminocoumarin antibiotic;carbapenem;peptide antibiotic;rifamycin antibiotic
CP032213.1.region001	CP0322130002	ARO:3005059|LptD|AIA35096.1	6.45e-169	504	efflux pump	aminocoumarin antibiotic;carbapenem;peptide antibiotic;rifamycin antibiotic
CP033040.1.region002	CP0330400008	ARO:3005059|LptD|AIA35096.1	1.68e-40	157	efflux pump	aminocoumarin antibiotic;carbapenem;peptide antibiotic;rifamycin antibiotic
CP033134.1.region001	CP0331340002	ARO:3005059|LptD|AIA35096.1	3.28e-169	504	efflux pump	aminocoumarin antibiotic;carbapenem;peptide antibiotic;rifamycin antibiotic
CP033137.1.region004	CP0331370021	ARO:3005059|LptD|AIA35096.1	1.22e-170	508	efflux pump	aminocoumarin antibiotic;carbapenem;peptide antibiotic;rifamycin antibiotic
CP033141.1.region004	CP0331410019	ARO:3005059|LptD|AIA35096.1	1.33e-169	506	efflux pump	aminocoumarin antibiotic;carbapenem;peptide antibiotic;rifamycin antibiotic
CP033144.1.region003	CP0331440021	ARO:3005059|LptD|AIA35096.1	1.24e-170	508	efflux pump	aminocoumarin antibiotic;carbapenem;peptide antibiotic;rifamycin antibiotic
CP033577.1.region003	CP0335770002	ARO:3005059|LptD|AIA35096.1	5.27e-153	462	efflux pump	aminocoumarin antibiotic;carbapenem;peptide antibiotic;rifamycin antibiotic
CP034565.1.region004	CP0345650018	ARO:3005059|LptD|AIA35096.1	6.45e-169	504	efflux pump	aminocoumarin antibiotic;carbapenem;peptide antibiotic;rifamycin antibiotic
CP034970.1.region003	CP0349700022	ARO:3005059|LptD|AIA35096.1	6.74e-168	501	efflux pump	aminocoumarin antibiotic;carbapenem;peptide antibiotic;rifamycin antibiotic
CP039700.1.region005	CP0397000023	ARO:3005059|LptD|AIA35096.1	4.96e-175	520	efflux pump	aminocoumarin antibiotic;carbapenem;peptide antibiotic;rifamycin antibiotic
CP041332.1.region002	CP0413320002	ARO:3005059|LptD|AIA35096.1	1.4e-172	513	efflux pump	aminocoumarin antibiotic;carbapenem;peptide antibiotic;rifamycin antibiotic
CP041336.1.region001	CP0413360031	ARO:3005059|LptD|AIA35096.1	3.85e-98	320	efflux pump	aminocoumarin antibiotic;carbapenem;peptide antibiotic;rifamycin antibiotic
CP043869.1.region004	CP0438690032	ARO:3005059|LptD|AIA35096.1	2.4e-89	295	efflux pump	aminocoumarin antibiotic;carbapenem;peptide antibiotic;rifamycin antibiotic
CP045070.1.region003	CP0450700020	ARO:3005059|LptD|AIA35096.1	5.65e-174	517	efflux pump	aminocoumarin antibiotic;carbapenem;peptide antibiotic;rifamycin antibiotic
CP045338.1.region001	CP0453380002	ARO:3005059|LptD|AIA35096.1	6.22e-163	488	efflux pump	aminocoumarin antibiotic;carbapenem;peptide antibiotic;rifamycin antibiotic
CP065369.1.region003	CP0653690018	ARO:3005059|LptD|AIA35096.1	3.21e-169	504	efflux pump	aminocoumarin antibiotic;carbapenem;peptide antibiotic;rifamycin antibiotic
WAHT01000007.1.region001	WAHT010000070019	ARO:3005059|LptD|AIA35096.1	4.53e-169	504	efflux pump	aminocoumarin antibiotic;carbapenem;peptide antibiotic;rifamycin antibiotic
CP000155.1.region009	CP0001550045	ARO:3004073|MuxA|AAG05916.1	1.71e-36	134	efflux pump	aminocoumarin antibiotic;macrolide antibiotic;monobactam;tetracycline antibiotic
CP001614.2.region011	CP0016140032	ARO:3004073|MuxA|AAG05916.1	4.17e-32	123	efflux pump	aminocoumarin antibiotic;macrolide antibiotic;monobactam;tetracycline antibiotic
CP029064.1.region005	CP0290640024	ARO:3004072|OpmB|AAG05913.1	8.72e-44	158	efflux pump	aminocoumarin antibiotic;macrolide antibiotic;monobactam;tetracycline antibiotic
CP046535.1.region004	CP0465350033	ARO:3004073|MuxA|AAG05916.1	7.34e-33	125	efflux pump	aminocoumarin antibiotic;macrolide antibiotic;monobactam;tetracycline antibiotic
AP012057.1.region003	AP0120570017	ARO:3005091|RanA|ADZ12699.1	3.34e-32	119	efflux pump	aminoglycoside antibiotic
AP013035.1.region001	AP0130350016	ARO:3005091|RanA|ADZ12699.1	2.4e-34	123	efflux pump	aminoglycoside antibiotic
AP019860.1.region008	AP0198600017	ARO:3005091|RanA|ADZ12699.1	1.2e-35	127	efflux pump	aminoglycoside antibiotic
BA000028.3.region006	BA0000280002	ARO:3005091|RanA|ADZ12699.1	1.06e-34	125	efflux pump	aminoglycoside antibiotic
BA000028.3.region005	BA0000280035	ARO:3005091|RanA|ADZ12699.1	1.89e-35	126	efflux pump	aminoglycoside antibiotic
BA000043.1.region002	BA0000430007	ARO:3005091|RanA|ADZ12699.1	1.43e-33	122	efflux pump	aminoglycoside antibiotic
CP000264.1.region006	CP0002640040	ARO:3005091|RanA|ADZ12699.1	1.03e-32	119	efflux pump	aminoglycoside antibiotic
CP001087.1.region002	CP0010870048	ARO:3005091|RanA|ADZ12699.1	4.18e-37	128	efflux pump	aminoglycoside antibiotic
CP001230.1.region003	CP0012300030	ARO:3005091|RanA|ADZ12699.1	3.31e-33	119	efflux pump	aminoglycoside antibiotic
CP001842.1.region001	CP0018420007	ARO:3005091|RanA|ADZ12699.1	3.59e-39	134	efflux pump	aminoglycoside antibiotic
CP002638.1.region010	CP0026380004	ARO:3005091|RanA|ADZ12699.1	4.88e-38	131	efflux pump	aminoglycoside antibiotic
CP002663.1.region007	CP0026630001	ARO:3005091|RanA|ADZ12699.1	1.12e-37	129	efflux pump	aminoglycoside antibiotic
CP002830.1.region017	CP0028300003	ARO:3005091|RanA|ADZ12699.1	9.26e-60	186	efflux pump	aminoglycoside antibiotic
CP003054.1.region001	CP0030540025	ARO:3005091|RanA|ADZ12699.1	4.5e-36	129	efflux pump	aminoglycoside antibiotic
CP003147.1.region002	CP0031470037	ARO:3005091|RanA|ADZ12699.1	1.28e-31	117	efflux pump	aminoglycoside antibiotic
CP003169.1.region017	CP0031690020	ARO:3005091|RanA|ADZ12699.1	7.59e-32	117	efflux pump	aminoglycoside antibiotic
CP003238.1.region001	CP0032380051	ARO:3005091|RanA|ADZ12699.1	7.93e-39	136	efflux pump	aminoglycoside antibiotic
CP008887.1.region002	CP0088870016	ARO:3005091|RanA|ADZ12699.1	6e-32	118	efflux pump	aminoglycoside antibiotic
CP009355.1.region002	CP0093550004	ARO:3005091|RanA|ADZ12699.1	2.25e-33	119	efflux pump	aminoglycoside antibiotic
CP009539.1.region001	CP0095390001	ARO:3003841|kdpE|AAC73788.1	2.31e-40	135	efflux pump	aminoglycoside antibiotic
CP010406.1.region006	CP0104060013	ARO:3005091|RanA|ADZ12699.1	3.03e-35	123	efflux pump	aminoglycoside antibiotic
CP010797.1.region009	CP0107970030	ARO:3003841|kdpE|AAC73788.1	1.3e-42	140	efflux pump	aminoglycoside antibiotic
CP010855.1.region005	CP0108550028	ARO:3003841|kdpE|AAC73788.1	1.44e-32	115	efflux pump	aminoglycoside antibiotic
CP011078.1.region001	CP0110780001	ARO:3003841|kdpE|AAC73788.1	2.31e-40	135	efflux pump	aminoglycoside antibiotic
CP013661.2.region002	CP0136610016	ARO:3005091|RanA|ADZ12699.1	1.18e-34	122	efflux pump	aminoglycoside antibiotic
CP014796.1.region004	CP0147960015	ARO:3004038|Pseudomonas|AAG08375.1	4.7e-32	106	efflux pump	aminoglycoside antibiotic
CP015381.1.region007	CP0153810021	ARO:3005091|RanA|ADZ12699.1	1.18e-45	150	efflux pump	aminoglycoside antibiotic
CP015641.1.region006	CP0156410023	ARO:3005091|RanA|ADZ12699.1	6.84e-34	121	efflux pump	aminoglycoside antibiotic
CP016538.2.region002	CP0165380004	ARO:3005091|RanA|ADZ12699.1	7.5e-34	119	efflux pump	aminoglycoside antibiotic
CP016539.2.region002	CP0165390004	ARO:3005091|RanA|ADZ12699.1	2.17e-33	118	efflux pump	aminoglycoside antibiotic
CP016543.2.region002	CP0165430003	ARO:3005091|RanA|ADZ12699.1	3.85e-34	120	efflux pump	aminoglycoside antibiotic
CP017476.1.region007	CP0174760010	ARO:3005091|RanA|ADZ12699.1	1.78e-33	119	efflux pump	aminoglycoside antibiotic
CP017476.1.region005	CP0174760013	ARO:3005091|RanA|ADZ12699.1	8.76e-34	123	efflux pump	aminoglycoside antibiotic
CP017599.1.region035	CP0175990008	ARO:3003841|kdpE|AAC73788.1	1.77e-47	154	efflux pump	aminoglycoside antibiotic
CP017708.1.region039	CP0177080002	ARO:3003841|kdpE|AAC73788.1	1.39e-47	154	efflux pump	aminoglycoside antibiotic
CP017775.1.region001	CP0177750026	ARO:3005091|RanA|ADZ12699.1	1.28e-34	122	efflux pump	aminoglycoside antibiotic
CP018197.1.region004	CP0181970004	ARO:3005091|RanA|ADZ12699.1	8.21e-31	112	efflux pump	aminoglycoside antibiotic
CP020038.1.region006	CP0200380002	ARO:3005091|RanA|ADZ12699.1	1.15e-32	120	efflux pump	aminoglycoside antibiotic
CP021781.1.region002	CP0217810011	ARO:3005091|RanA|ADZ12699.1	4.33e-43	144	efflux pump	aminoglycoside antibiotic
CP023184.1.region003	CP0231840001	ARO:3003841|kdpE|AAC73788.1	2.31e-40	135	efflux pump	aminoglycoside antibiotic
CP025987.1.region003	CP0259870009	ARO:3005091|RanA|ADZ12699.1	1.6e-32	119	efflux pump	aminoglycoside antibiotic
CP026525.1.region005	CP0265250001	ARO:3005091|RanA|ADZ12699.1	5.12e-41	139	efflux pump	aminoglycoside antibiotic
CP026525.1.region001	CP0265250005	ARO:3005091|RanA|ADZ12699.1	1.55e-38	132	efflux pump	aminoglycoside antibiotic
CP026747.1.region002	CP0267470001	ARO:3005091|RanA|ADZ12699.1	1.01e-36	130	efflux pump	aminoglycoside antibiotic
CP028158.1.region007	CP0281580009	ARO:3005091|RanA|ADZ12699.1	1.63e-36	130	efflux pump	aminoglycoside antibiotic
CP028158.1.region009	CP0281580051	ARO:3005091|RanA|ADZ12699.1	4.72e-33	118	efflux pump	aminoglycoside antibiotic
CP028159.1.region005	CP0281590009	ARO:3005091|RanA|ADZ12699.1	1.48e-36	131	efflux pump	aminoglycoside antibiotic
CP028159.1.region007	CP0281590048	ARO:3005091|RanA|ADZ12699.1	4.11e-33	118	efflux pump	aminoglycoside antibiotic
CP028901.1.region004	CP0289010001	ARO:3005091|RanA|ADZ12699.1	5.6e-35	124	efflux pump	aminoglycoside antibiotic
CP028901.1.region002	CP0289010022	ARO:3005091|RanA|ADZ12699.1	2.17e-36	130	efflux pump	aminoglycoside antibiotic
CP029043.1.region003	CP0290430006	ARO:3005091|RanA|ADZ12699.1	1.76e-36	130	efflux pump	aminoglycoside antibiotic
CP029463.1.region002	CP0294630019	ARO:3005090|RanB|ADZ12700.1	3.21e-80	239	efflux pump	aminoglycoside antibiotic
CP030064.1.region003	CP0300640012	ARO:3005091|RanA|ADZ12699.1	1.59e-38	133	efflux pump	aminoglycoside antibiotic
CP030097.1.region001	CP0300970028	ARO:3005091|RanA|ADZ12699.1	1.73e-35	124	efflux pump	aminoglycoside antibiotic
CP030885.1.region005	CP0308850001	ARO:3005091|RanA|ADZ12699.1	6.2e-37	131	efflux pump	aminoglycoside antibiotic
CP031598.1.region006	CP0315980007	ARO:3005091|RanA|ADZ12699.1	5.63e-33	120	efflux pump	aminoglycoside antibiotic
CP031760.1.region003	CP0317600028	ARO:3000491|acrD|BAA16344.1	1.12e-33	136	efflux pump	aminoglycoside antibiotic
CP032125.1.region001	CP0321250014	ARO:3005091|RanA|ADZ12699.1	2.64e-33	121	efflux pump	aminoglycoside antibiotic
CP032153.1.region001	CP0321530016	ARO:3005091|RanA|ADZ12699.1	1.66e-35	127	efflux pump	aminoglycoside antibiotic
CP032153.1.region003	CP0321530062	ARO:3005091|RanA|ADZ12699.1	3.69e-45	149	efflux pump	aminoglycoside antibiotic
CP032521.1.region003	CP0325210003	ARO:3005091|RanA|ADZ12699.1	8.07e-34	120	efflux pump	aminoglycoside antibiotic
CP032521.1.region004	CP0325210030	ARO:3005091|RanA|ADZ12699.1	9.6e-35	123	efflux pump	aminoglycoside antibiotic
CP032521.1.region006	CP0325210063	ARO:3005091|RanA|ADZ12699.1	3.69e-45	149	efflux pump	aminoglycoside antibiotic
CP033601.1.region001	CP0336010030	ARO:3005091|RanA|ADZ12699.1	3.26e-33	121	efflux pump	aminoglycoside antibiotic
CP034425.1.region004	CP0344250022	ARO:3005091|RanA|ADZ12699.1	1.16e-34	124	efflux pump	aminoglycoside antibiotic
CP034588.1.region004	CP0345880029	ARO:3005091|RanA|ADZ12699.1	1.68e-40	137	efflux pump	aminoglycoside antibiotic
CP034759.1.region002	CP0347590004	ARO:3005091|RanA|ADZ12699.1	4.03e-39	134	efflux pump	aminoglycoside antibiotic
CP035928.1.region003	CP0359280009	ARO:3005091|RanA|ADZ12699.1	2.54e-32	119	efflux pump	aminoglycoside antibiotic
CP036298.1.region008	CP0362980015	ARO:3005091|RanA|ADZ12699.1	1.9e-34	121	efflux pump	aminoglycoside antibiotic
CP039700.1.region003	CP0397000023	ARO:3005091|RanA|ADZ12699.1	3.79e-32	119	efflux pump	aminoglycoside antibiotic
CP040441.1.region002	CP0404410027	ARO:3005091|RanA|ADZ12699.1	2.82e-31	113	efflux pump	aminoglycoside antibiotic
CP040747.1.region010	CP0407470038	ARO:3005091|RanA|ADZ12699.1	3.58e-34	123	efflux pump	aminoglycoside antibiotic
CP041326.1.region001	CP0413260001	ARO:3005091|RanA|ADZ12699.1	3.2e-44	147	efflux pump	aminoglycoside antibiotic
CP041932.1.region001	CP0419320001	ARO:3005091|RanA|ADZ12699.1	7.34e-31	115	efflux pump	aminoglycoside antibiotic
CP042914.1.region008	CP0429140047	ARO:3005091|RanA|ADZ12699.1	1.7e-47	157	efflux pump	aminoglycoside antibiotic
CP042914.1.region008	CP0429140048	ARO:3005090|RanB|ADZ12700.1	6.36e-32	116	efflux pump	aminoglycoside antibiotic
CP044407.1.region005	CP0444070015	ARO:3005091|RanA|ADZ12699.1	1.2e-44	150	efflux pump	aminoglycoside antibiotic
CP045318.1.region005	CP0453180028	ARO:3005091|RanA|ADZ12699.1	4.25e-37	131	efflux pump	aminoglycoside antibiotic
CP045325.1.region006	CP0453250034	ARO:3005091|RanA|ADZ12699.1	1.09e-31	114	efflux pump	aminoglycoside antibiotic
CP045328.1.region004	CP0453280001	ARO:3005091|RanA|ADZ12699.1	1.64e-34	122	efflux pump	aminoglycoside antibiotic
CP045333.1.region004	CP0453330001	ARO:3005091|RanA|ADZ12699.1	1.64e-34	122	efflux pump	aminoglycoside antibiotic
CP045344.1.region004	CP0453440001	ARO:3005091|RanA|ADZ12699.1	1.64e-34	122	efflux pump	aminoglycoside antibiotic
CP045350.1.region005	CP0453500036	ARO:3005091|RanA|ADZ12699.1	2.93e-38	132	efflux pump	aminoglycoside antibiotic
CP045360.1.region005	CP0453600028	ARO:3005091|RanA|ADZ12699.1	4.12e-37	131	efflux pump	aminoglycoside antibiotic
CP045380.1.region004	CP0453800001	ARO:3005091|RanA|ADZ12699.1	4.42e-34	121	efflux pump	aminoglycoside antibiotic
CP045393.1.region007	CP0453930018	ARO:3005091|RanA|ADZ12699.1	2.35e-34	124	efflux pump	aminoglycoside antibiotic
CP045410.1.region007	CP0454100001	ARO:3005091|RanA|ADZ12699.1	2.35e-34	124	efflux pump	aminoglycoside antibiotic
CP045416.1.region001	CP0454160034	ARO:3005091|RanA|ADZ12699.1	4.33e-36	128	efflux pump	aminoglycoside antibiotic
CP046103.1.region006	CP0461030037	ARO:3005091|RanA|ADZ12699.1	9.06e-35	125	efflux pump	aminoglycoside antibiotic
CP047670.1.region001	CP0476700016	ARO:3005091|RanA|ADZ12699.1	2.35e-33	121	efflux pump	aminoglycoside antibiotic
CP047670.1.region003	CP0476700071	ARO:3005091|RanA|ADZ12699.1	2.34e-44	147	efflux pump	aminoglycoside antibiotic
CP048620.1.region002	CP0486200002	ARO:3005091|RanA|ADZ12699.1	8.56e-34	120	efflux pump	aminoglycoside antibiotic
CP048685.1.region003	CP0486850001	ARO:3005091|RanA|ADZ12699.1	5.12e-32	115	efflux pump	aminoglycoside antibiotic
CP048882.1.region003	CP0488820001	ARO:3003841|kdpE|AAC73788.1	4.15e-52	165	efflux pump	aminoglycoside antibiotic
CP054916.1.region022	CP0549160043	ARO:3005091|RanA|ADZ12699.1	4.04e-33	118	efflux pump	aminoglycoside antibiotic
CP054923.1.region013	CP0549230002	ARO:3005091|RanA|ADZ12699.1	1.67e-36	127	efflux pump	aminoglycoside antibiotic
CP054923.1.region001	CP0549230017	ARO:3005091|RanA|ADZ12699.1	5.45e-35	124	efflux pump	aminoglycoside antibiotic
CP054932.1.region015	CP0549320024	ARO:3005091|RanA|ADZ12699.1	9.63e-45	150	efflux pump	aminoglycoside antibiotic
CP056041.1.region037	CP0560410015	ARO:3005091|RanA|ADZ12699.1	1.3e-36	130	efflux pump	aminoglycoside antibiotic
CP059163.1.region003	CP0591630024	ARO:3005091|RanA|ADZ12699.1	5.83e-33	121	efflux pump	aminoglycoside antibiotic
CP060397.1.region007	CP0603970001	ARO:3005091|RanA|ADZ12699.1	5.91e-35	123	efflux pump	aminoglycoside antibiotic
CP061938.1.region002	CP0619380028	ARO:3005091|RanA|ADZ12699.1	1.38e-34	122	efflux pump	aminoglycoside antibiotic
CP071798.1.region003	CP0717980001	ARO:3005091|RanA|ADZ12699.1	1.4e-33	122	efflux pump	aminoglycoside antibiotic
LR027554.1.region001	LR0275540021	ARO:3005091|RanA|ADZ12699.1	3.05e-35	127	efflux pump	aminoglycoside antibiotic
LR881183.1.region001	LR8811830016	ARO:3005091|RanA|ADZ12699.1	8.93e-31	115	efflux pump	aminoglycoside antibiotic
BA000043.1.region005	BA0000430001	ARO:3004077|PmpM|AAG04750.1	1.84e-80	254	efflux pump	aminoglycoside antibiotic;benzalkonium chloride;fluoroquinolone antibiotic
CP004404.1.region002	CP0044040033	ARO:3004077|PmpM|AAG04750.1	1.1e-115	345	efflux pump	aminoglycoside antibiotic;benzalkonium chloride;fluoroquinolone antibiotic
CP011832.1.region002	CP0118320001	ARO:3004077|PmpM|AAG04750.1	4.76e-81	256	efflux pump	aminoglycoside antibiotic;benzalkonium chloride;fluoroquinolone antibiotic
CP025408.1.region008	CP0254080020	ARO:3004077|PmpM|AAG04750.1	9.35e-63	208	efflux pump	aminoglycoside antibiotic;benzalkonium chloride;fluoroquinolone antibiotic
CP026604.1.region002	CP0266040022	ARO:3004077|PmpM|AAG04750.1	1.09e-80	255	efflux pump	aminoglycoside antibiotic;benzalkonium chloride;fluoroquinolone antibiotic
CP029188.1.region015	CP0291880016	ARO:3004077|PmpM|AAG04750.1	1.2e-31	124	efflux pump	aminoglycoside antibiotic;benzalkonium chloride;fluoroquinolone antibiotic
CP029632.1.region001	CP0296320003	ARO:3004077|PmpM|AAG04750.1	1.04e-71	231	efflux pump	aminoglycoside antibiotic;benzalkonium chloride;fluoroquinolone antibiotic
CP030887.1.region001	CP0308870020	ARO:3004077|PmpM|AAG04750.1	3.7e-87	271	efflux pump	aminoglycoside antibiotic;benzalkonium chloride;fluoroquinolone antibiotic
CP031700.1.region001	CP0317000009	ARO:3004077|PmpM|AAG04750.1	4.6e-97	297	efflux pump	aminoglycoside antibiotic;benzalkonium chloride;fluoroquinolone antibiotic
CP034587.1.region024	CP0345870006	ARO:3004077|PmpM|AAG04750.1	2.07e-31	123	efflux pump	aminoglycoside antibiotic;benzalkonium chloride;fluoroquinolone antibiotic
CP034971.1.region001	CP0349710032	ARO:3004077|PmpM|AAG04750.1	2.2e-54	183	efflux pump	aminoglycoside antibiotic;benzalkonium chloride;fluoroquinolone antibiotic
CP041632.1.region002	CP0416320001	ARO:3004077|PmpM|AAG04750.1	2.84e-97	298	efflux pump	aminoglycoside antibiotic;benzalkonium chloride;fluoroquinolone antibiotic
CP054929.1.region033	CP0549290030	ARO:3004077|PmpM|AAG04750.1	1.62e-33	129	efflux pump	aminoglycoside antibiotic;benzalkonium chloride;fluoroquinolone antibiotic
FO203527.1.region003	FO2035270021	ARO:3004077|PmpM|AAG04750.1	8.78e-114	340	efflux pump	aminoglycoside antibiotic;benzalkonium chloride;fluoroquinolone antibiotic
LT703001.1.region003	LT7030010028	ARO:3004077|PmpM|AAG04750.1	4.96e-47	166	efflux pump	aminoglycoside antibiotic;benzalkonium chloride;fluoroquinolone antibiotic
AP012273.1.region002	AP0122730009	ARO:3003053|smeC|AAD51346.1	5.56e-43	156	efflux pump	aminoglycoside antibiotic;cephalosporin;cephamycin;penam
AP017900.1.region020	AP0179000009	ARO:3003067|smeS|AAD51347.1	8.66e-32	124	efflux pump	aminoglycoside antibiotic;cephalosporin;cephamycin;penam
AP017928.1.region013	AP0179280017	ARO:3003067|smeS|AAD51347.1	6.21e-31	122	efflux pump	aminoglycoside antibiotic;cephalosporin;cephamycin;penam
CP000142.2.region001	CP0001420017	ARO:3003067|smeS|AAD51347.1	1.35e-100	306	efflux pump	aminoglycoside antibiotic;cephalosporin;cephamycin;penam
CP000507.1.region001	CP0005070001	ARO:3003067|smeS|AAD51347.1	3.02e-47	167	efflux pump	aminoglycoside antibiotic;cephalosporin;cephamycin;penam
CP000507.1.region001	CP0005070003	ARO:3003067|smeS|AAD51347.1	1.8e-36	141	efflux pump	aminoglycoside antibiotic;cephalosporin;cephamycin;penam
CP001614.2.region007	CP0016140036	ARO:3003067|smeS|AAD51347.1	6.57e-84	263	efflux pump	aminoglycoside antibiotic;cephalosporin;cephamycin;penam
CP013145.1.region002	CP0131450023	ARO:3003067|smeS|AAD51347.1	6.67e-34	130	efflux pump	aminoglycoside antibiotic;cephalosporin;cephamycin;penam
CP015163.1.region026	CP0151630007	ARO:3003067|smeS|AAD51347.1	3.8e-34	130	efflux pump	aminoglycoside antibiotic;cephalosporin;cephamycin;penam
CP015518.1.region002	CP0155180017	ARO:3003067|smeS|AAD51347.1	3.14e-99	303	efflux pump	aminoglycoside antibiotic;cephalosporin;cephamycin;penam
CP017839.1.region010	CP0178390003	ARO:3003067|smeS|AAD51347.1	8.66e-32	124	efflux pump	aminoglycoside antibiotic;cephalosporin;cephamycin;penam
CP020694.1.region003	CP0206940002	ARO:3003067|smeS|AAD51347.1	4.4e-67	219	efflux pump	aminoglycoside antibiotic;cephalosporin;cephamycin;penam
CP025117.1.region001	CP0251170001	ARO:3003053|smeC|AAD51346.1	7.5e-34	130	efflux pump	aminoglycoside antibiotic;cephalosporin;cephamycin;penam
CP029254.1.region006	CP0292540022	ARO:3003066|smeR|AAD51348.1	4.87e-36	124	efflux pump	aminoglycoside antibiotic;cephalosporin;cephamycin;penam
CP031010.1.region005	CP0310100008	ARO:3003053|smeC|AAD51346.1	4.34e-36	136	efflux pump	aminoglycoside antibiotic;cephalosporin;cephamycin;penam
CP031598.1.region007	CP0315980016	ARO:3003066|smeR|AAD51348.1	3.25e-35	122	efflux pump	aminoglycoside antibiotic;cephalosporin;cephamycin;penam
CP031969.1.region010	CP0319690024	ARO:3003066|smeR|AAD51348.1	3.89e-31	112	efflux pump	aminoglycoside antibiotic;cephalosporin;cephamycin;penam
CP032618.1.region006	CP0326180036	ARO:3003053|smeC|AAD51346.1	9.15e-41	149	efflux pump	aminoglycoside antibiotic;cephalosporin;cephamycin;penam
CP034587.1.region021	CP0345870019	ARO:3003067|smeS|AAD51347.1	4.66e-37	136	efflux pump	aminoglycoside antibiotic;cephalosporin;cephamycin;penam
CP036200.1.region002	CP0362000032	ARO:3003067|smeS|AAD51347.1	6.59e-69	225	efflux pump	aminoglycoside antibiotic;cephalosporin;cephamycin;penam
CP036534.1.region018	CP0365340001	ARO:3003067|smeS|AAD51347.1	4.71e-38	139	efflux pump	aminoglycoside antibiotic;cephalosporin;cephamycin;penam
CP040656.1.region015	CP0406560016	ARO:3003067|smeS|AAD51347.1	5.48e-32	124	efflux pump	aminoglycoside antibiotic;cephalosporin;cephamycin;penam
CP041063.1.region003	CP0410630012	ARO:3003067|smeS|AAD51347.1	2.94e-32	127	efflux pump	aminoglycoside antibiotic;cephalosporin;cephamycin;penam
CP041244.1.region013	CP0412440027	ARO:3003067|smeS|AAD51347.1	1.24e-42	151	efflux pump	aminoglycoside antibiotic;cephalosporin;cephamycin;penam
CP043317.1.region021	CP0433170068	ARO:3003067|smeS|AAD51347.1	5.06e-38	139	efflux pump	aminoglycoside antibiotic;cephalosporin;cephamycin;penam
CP045325.1.region008	CP0453250035	ARO:3003067|smeS|AAD51347.1	1.59e-47	165	efflux pump	aminoglycoside antibiotic;cephalosporin;cephamycin;penam
CP054916.1.region015	CP0549160009	ARO:3003067|smeS|AAD51347.1	1.82e-37	137	efflux pump	aminoglycoside antibiotic;cephalosporin;cephamycin;penam
CP054920.1.region015	CP0549200070	ARO:3003067|smeS|AAD51347.1	3.62e-38	139	efflux pump	aminoglycoside antibiotic;cephalosporin;cephamycin;penam
CP058561.1.region012	CP0585610022	ARO:3003067|smeS|AAD51347.1	4.03e-43	155	efflux pump	aminoglycoside antibiotic;cephalosporin;cephamycin;penam
LR136958.1.region001	LR1369580015	ARO:3003053|smeC|AAD51346.1	3.02e-31	122	efflux pump	aminoglycoside antibiotic;cephalosporin;cephamycin;penam
LT629804.1.region001	LT6298040019	ARO:3003066|smeR|AAD51348.1	6.53e-34	118	efflux pump	aminoglycoside antibiotic;cephalosporin;cephamycin;penam
CP033466.1.region002	CP0334660004	ARO:3004583|Klebsiella|BAH63252.1	4.24e-66	192	efflux pump	aminoglycoside antibiotic;cephalosporin;macrolide antibiotic;peptide antibiotic;rifamycin antibiotic;tetracycline antibiotic
CP033466.1.region002	CP0334660005	ARO:3004580|Klebsiella|BAH63251.1	6.36e-67	195	efflux pump	aminoglycoside antibiotic;cephalosporin;macrolide antibiotic;peptide antibiotic;rifamycin antibiotic;tetracycline antibiotic
AP019807.1.region007	AP0198070035	ARO:3004572|Staphylococcus|AAW38464.1	1.25e-33	129	efflux pump	aminoglycoside antibiotic;diaminopyrimidine antibiotic;macrolide antibiotic;oxazolidinone antibiotic;phenicol antibiotic
CM001772.1.region001	CM0017720007	ARO:3004572|Staphylococcus|AAW38464.1	3.06e-40	148	efflux pump	aminoglycoside antibiotic;diaminopyrimidine antibiotic;macrolide antibiotic;oxazolidinone antibiotic;phenicol antibiotic
CP015163.1.region011	CP0151630004	ARO:3004572|Staphylococcus|AAW38464.1	1.78e-71	231	efflux pump	aminoglycoside antibiotic;diaminopyrimidine antibiotic;macrolide antibiotic;oxazolidinone antibiotic;phenicol antibiotic
CP029241.1.region008	CP0292410013	ARO:3004572|Staphylococcus|AAW38464.1	2.9e-67	221	efflux pump	aminoglycoside antibiotic;diaminopyrimidine antibiotic;macrolide antibiotic;oxazolidinone antibiotic;phenicol antibiotic
CP041244.1.region014	CP0412440018	ARO:3004572|Staphylococcus|AAW38464.1	9.81e-70	228	efflux pump	aminoglycoside antibiotic;diaminopyrimidine antibiotic;macrolide antibiotic;oxazolidinone antibiotic;phenicol antibiotic
CP044407.1.region002	CP0444070022	ARO:3004572|Staphylococcus|AAW38464.1	1.24e-73	238	efflux pump	aminoglycoside antibiotic;diaminopyrimidine antibiotic;macrolide antibiotic;oxazolidinone antibiotic;phenicol antibiotic
CP000267.1.region001	CP0002670010	ARO:3003010|ceoB|AAB58161.1	1.49e-38	153	efflux pump	aminoglycoside antibiotic;fluoroquinolone antibiotic
CP000821.1.region004	CP0008210027	ARO:3003010|ceoB|AAB58161.1	3.88e-40	157	efflux pump	aminoglycoside antibiotic;fluoroquinolone antibiotic
CP010535.1.region003	CP0105350017	ARO:3003010|ceoB|AAB58161.1	3.09e-52	197	efflux pump	aminoglycoside antibiotic;fluoroquinolone antibiotic
CP018309.1.region003	CP0183090002	ARO:3003010|ceoB|AAB58161.1	3.11e-36	145	efflux pump	aminoglycoside antibiotic;fluoroquinolone antibiotic
CP021646.1.region006	CP0216460037	ARO:3003010|ceoB|AAB58161.1	1.12e-42	166	efflux pump	aminoglycoside antibiotic;fluoroquinolone antibiotic
CP022103.1.region003	CP0221030026	ARO:3003037|opcM|AAC43969.1	4.25e-33	128	efflux pump	aminoglycoside antibiotic;fluoroquinolone antibiotic
CP022356.1.region002	CP0223560038	ARO:3003010|ceoB|AAB58161.1	4.47e-44	170	efflux pump	aminoglycoside antibiotic;fluoroquinolone antibiotic
CP031759.1.region006	CP0317590037	ARO:3003010|ceoB|AAB58161.1	1.06e-42	166	efflux pump	aminoglycoside antibiotic;fluoroquinolone antibiotic
CP031761.1.region006	CP0317610037	ARO:3003010|ceoB|AAB58161.1	1.12e-42	166	efflux pump	aminoglycoside antibiotic;fluoroquinolone antibiotic
CP033578.1.region003	CP0335780002	ARO:3003010|ceoB|AAB58161.1	4.26e-37	148	efflux pump	aminoglycoside antibiotic;fluoroquinolone antibiotic
CP036264.1.region005	CP0362640020	ARO:3003010|ceoB|AAB58161.1	5.14e-38	151	efflux pump	aminoglycoside antibiotic;fluoroquinolone antibiotic
CP036264.1.region005	CP0362640022	ARO:3003010|ceoB|AAB58161.1	3.63e-35	142	efflux pump	aminoglycoside antibiotic;fluoroquinolone antibiotic
CP045119.1.region002	CP0451190007	ARO:3003010|ceoB|AAB58161.1	1.49e-37	150	efflux pump	aminoglycoside antibiotic;fluoroquinolone antibiotic
CP050451.1.region002	CP0504510015	ARO:3003010|ceoB|AAB58161.1	2.64e-36	145	efflux pump	aminoglycoside antibiotic;fluoroquinolone antibiotic
CP050454.1.region003	CP0504540016	ARO:3003010|ceoB|AAB58161.1	2.1e-37	149	efflux pump	aminoglycoside antibiotic;fluoroquinolone antibiotic
CP031223.1.region001	CP0312230004	ARO:3003064|ykkD|CAB13167.1	1.47e-36	117	efflux pump	aminoglycoside antibiotic;phenicol antibiotic;tetracycline antibiotic
CM002271.1.region001	CM0022710026	ARO:3003962|farB|AAF40764.1	3.12e-33	129	efflux pump	antibacterial free fatty acids
CM002271.1.region025	CM0022710035	ARO:3003962|farB|AAF40764.1	3.12e-33	129	efflux pump	antibacterial free fatty acids
CM002273.1.region001	CM0022730026	ARO:3003962|farB|AAF40764.1	3.12e-33	129	efflux pump	antibacterial free fatty acids
CM002273.1.region026	CM0022730035	ARO:3003962|farB|AAF40764.1	3.12e-33	129	efflux pump	antibacterial free fatty acids
CP000020.2.region001	CP0000200042	ARO:3003961|farA|AAF40763.1	5.23e-48	163	efflux pump	antibacterial free fatty acids
CP001139.1.region001	CP0011390042	ARO:3003961|farA|AAF40763.1	1.47e-40	143	efflux pump	antibacterial free fatty acids
CP002377.1.region004	CP0023770003	ARO:3003961|farA|AAF40763.1	1.26e-85	263	efflux pump	antibacterial free fatty acids
CP002377.1.region005	CP0023770013	ARO:3003961|farA|AAF40763.1	1.62e-37	135	efflux pump	antibacterial free fatty acids
CP009265.2.region001	CP0092650022	ARO:3003961|farA|AAF40763.1	6.6e-35	128	efflux pump	antibacterial free fatty acids
CP009618.1.region002	CP0096180015	ARO:3003961|farA|AAF40763.1	6.6e-35	128	efflux pump	antibacterial free fatty acids
CP011310.1.region002	CP0113100002	ARO:3003961|farA|AAF40763.1	4.74e-45	156	efflux pump	antibacterial free fatty acids
CP013611.1.region005	CP0136110005	ARO:3003962|farB|AAF40764.1	1.71e-32	127	efflux pump	antibacterial free fatty acids
CP016076.1.region017	CP0160760089	ARO:3003962|farB|AAF40764.1	9.89e-32	125	efflux pump	antibacterial free fatty acids
CP016077.1.region016	CP0160770088	ARO:3003962|farB|AAF40764.1	9.89e-32	125	efflux pump	antibacterial free fatty acids
CP016557.1.region001	CP0165570016	ARO:3003961|farA|AAF40763.1	6.74e-35	128	efflux pump	antibacterial free fatty acids
CP020454.1.region001	CP0204540016	ARO:3003961|farA|AAF40763.1	6.6e-35	128	efflux pump	antibacterial free fatty acids
CP021112.1.region004	CP0211120025	ARO:3003961|farA|AAF40763.1	1.73e-33	126	efflux pump	antibacterial free fatty acids
CP022103.1.region003	CP0221030027	ARO:3003961|farA|AAF40763.1	3.41e-71	225	efflux pump	antibacterial free fatty acids
CP022525.1.region007	CP0225250040	ARO:3003961|farA|AAF40763.1	1.25e-42	150	efflux pump	antibacterial free fatty acids
CP022526.1.region010	CP0225260040	ARO:3003961|farA|AAF40763.1	1.25e-42	150	efflux pump	antibacterial free fatty acids
CP029495.1.region004	CP0294950001	ARO:3003961|farA|AAF40763.1	1.51e-87	266	efflux pump	antibacterial free fatty acids
CP031473.1.region001	CP0314730016	ARO:3003961|farA|AAF40763.1	6.6e-35	128	efflux pump	antibacterial free fatty acids
CP032618.1.region006	CP0326180013	ARO:3003961|farA|AAF40763.1	7.52e-39	140	efflux pump	antibacterial free fatty acids
CP035952.1.region006	CP0359520022	ARO:3003961|farA|AAF40763.1	1.29e-38	139	efflux pump	antibacterial free fatty acids
CP035952.1.region006	CP0359520023	ARO:3003962|farB|AAF40764.1	1.42e-38	144	efflux pump	antibacterial free fatty acids
CP045351.1.region003	CP0453510033	ARO:3003961|farA|AAF40763.1	1.44e-35	130	efflux pump	antibacterial free fatty acids
CP045356.1.region001	CP0453560017	ARO:3003961|farA|AAF40763.1	4.26e-34	126	efflux pump	antibacterial free fatty acids
CP046066.1.region003	CP0460660026	ARO:3003961|farA|AAF40763.1	4.26e-34	126	efflux pump	antibacterial free fatty acids
CP046163.1.region003	CP0461630026	ARO:3003961|farA|AAF40763.1	4.26e-34	126	efflux pump	antibacterial free fatty acids
CP062941.1.region002	CP0629410016	ARO:3003961|farA|AAF40763.1	2.54e-43	152	efflux pump	antibacterial free fatty acids
AP018498.1.region005	AP0184980013	ARO:3003801|bcr-1|ALV80601.1	6.88e-35	130	efflux pump	bicyclomycin
AP019389.1.region002	AP0193890007	ARO:3003801|bcr-1|ALV80601.1	1.35e-36	135	efflux pump	bicyclomycin
AP021879.1.region003	AP0218790007	ARO:3003801|bcr-1|ALV80601.1	2.68e-48	166	efflux pump	bicyclomycin
CP000157.1.region001	CP0001570014	ARO:3003801|bcr-1|ALV80601.1	1.81e-36	135	efflux pump	bicyclomycin
CP000851.1.region003	CP0008510007	ARO:3003801|bcr-1|ALV80601.1	4.9e-36	133	efflux pump	bicyclomycin
CP000931.1.region004	CP0009310007	ARO:3003801|bcr-1|ALV80601.1	3.38e-37	136	efflux pump	bicyclomycin
CP002078.1.region002	CP0020780003	ARO:3003801|bcr-1|ALV80601.1	5.18e-41	147	efflux pump	bicyclomycin
CP003220.1.region001	CP0032200029	ARO:3003801|bcr-1|ALV80601.1	6.29e-40	144	efflux pump	bicyclomycin
CP006896.1.region002	CP0068960038	ARO:3003801|bcr-1|ALV80601.1	5.18e-41	147	efflux pump	bicyclomycin
CP006898.1.region002	CP0068980037	ARO:3003801|bcr-1|ALV80601.1	7.11e-38	137	efflux pump	bicyclomycin
CP007595.1.region003	CP0075950030	ARO:3003801|bcr-1|ALV80601.1	7.27e-56	186	efflux pump	bicyclomycin
CP009291.1.region005	CP0092910010	ARO:3003801|bcr-1|ALV80601.1	6.76e-37	136	efflux pump	bicyclomycin
CP009574.1.region002	CP0095740010	ARO:3003801|bcr-1|ALV80601.1	2.24e-40	145	efflux pump	bicyclomycin
CP010406.1.region007	CP0104060015	ARO:3003801|bcr-1|ALV80601.1	5.67e-64	207	efflux pump	bicyclomycin
CP011001.1.region001	CP0110010011	ARO:3003801|bcr-1|ALV80601.1	1.66e-41	148	efflux pump	bicyclomycin
CP011002.1.region003	CP0110020009	ARO:3003801|bcr-1|ALV80601.1	1.66e-41	148	efflux pump	bicyclomycin
CP011003.1.region003	CP0110030009	ARO:3003801|bcr-1|ALV80601.1	1.66e-41	148	efflux pump	bicyclomycin
CP011012.1.region001	CP0110120007	ARO:3003801|bcr-1|ALV80601.1	3.54e-45	158	efflux pump	bicyclomycin
CP011029.1.region001	CP0110290009	ARO:3003801|bcr-1|ALV80601.1	3.76e-37	135	efflux pump	bicyclomycin
CP011344.1.region002	CP0113440008	ARO:3003801|bcr-1|ALV80601.1	3.22e-37	137	efflux pump	bicyclomycin
CP011452.2.region002	CP0114520008	ARO:3003801|bcr-1|ALV80601.1	4.11e-35	131	efflux pump	bicyclomycin
CP011805.1.region001	CP0118050009	ARO:3003801|bcr-1|ALV80601.1	2.45e-32	123	efflux pump	bicyclomycin
CP015963.1.region001	CP0159630015	ARO:3003801|bcr-1|ALV80601.1	3.51e-42	150	efflux pump	bicyclomycin
CP016545.1.region002	CP0165450007	ARO:3003801|bcr-1|ALV80601.1	2.61e-37	137	efflux pump	bicyclomycin
CP016591.1.region004	CP0165910014	ARO:3003801|bcr-1|ALV80601.1	6.17e-41	147	efflux pump	bicyclomycin
CP016796.1.region005	CP0167960055	ARO:3003801|bcr-1|ALV80601.1	9.98e-32	121	efflux pump	bicyclomycin
CP017057.1.region002	CP0170570006	ARO:3003801|bcr-1|ALV80601.1	3.9e-36	134	efflux pump	bicyclomycin
CP017775.1.region011	CP0177750029	ARO:3003801|bcr-1|ALV80601.1	2.21e-63	206	efflux pump	bicyclomycin
CP018097.1.region002	CP0180970007	ARO:3003801|bcr-1|ALV80601.1	4.77e-36	134	efflux pump	bicyclomycin
CP021377.1.region002	CP0213770007	ARO:3003801|bcr-1|ALV80601.1	8.11e-33	124	efflux pump	bicyclomycin
CP021781.1.region003	CP0217810010	ARO:3003801|bcr-1|ALV80601.1	1.07e-38	140	efflux pump	bicyclomycin
CP021912.1.region002	CP0219120015	ARO:3003801|bcr-1|ALV80601.1	2.77e-31	120	efflux pump	bicyclomycin
CP022528.1.region001	CP0225280016	ARO:3003801|bcr-1|ALV80601.1	5.76e-37	136	efflux pump	bicyclomycin
CP024920.1.region004	CP0249200008	ARO:3003801|bcr-1|ALV80601.1	4.59e-37	137	efflux pump	bicyclomycin
CP025990.1.region014	CP0259900055	ARO:3003801|bcr-1|ALV80601.1	4.23e-69	221	efflux pump	bicyclomycin
CP025990.1.region014	CP0259900056	ARO:3003801|bcr-1|ALV80601.1	7.95e-69	221	efflux pump	bicyclomycin
CP028897.1.region002	CP0288970013	ARO:3003801|bcr-1|ALV80601.1	8.62e-36	132	efflux pump	bicyclomycin
CP030097.1.region011	CP0300970029	ARO:3003801|bcr-1|ALV80601.1	7.8e-64	207	efflux pump	bicyclomycin
CP031155.1.region003	CP0311550005	ARO:3003801|bcr-1|ALV80601.1	1.09e-40	146	efflux pump	bicyclomycin
CP031263.1.region009	CP0312630030	ARO:3003801|bcr-1|ALV80601.1	3.48e-65	211	efflux pump	bicyclomycin
CP031357.1.region003	CP0313570008	ARO:3003801|bcr-1|ALV80601.1	3.8e-38	139	efflux pump	bicyclomycin
CP031963.1.region001	CP0319630026	ARO:3003801|bcr-1|ALV80601.1	2.11e-33	126	efflux pump	bicyclomycin
CP031965.1.region003	CP0319650034	ARO:3003801|bcr-1|ALV80601.1	4.26e-38	139	efflux pump	bicyclomycin
CP031966.1.region001	CP0319660015	ARO:3003801|bcr-1|ALV80601.1	6.98e-32	122	efflux pump	bicyclomycin
CP032096.1.region002	CP0320960007	ARO:3003801|bcr-1|ALV80601.1	1.19e-40	146	efflux pump	bicyclomycin
CP032153.1.region003	CP0321530038	ARO:3003801|bcr-1|ALV80601.1	2.24e-39	142	efflux pump	bicyclomycin
CP032228.1.region003	CP0322280007	ARO:3003801|bcr-1|ALV80601.1	1.42e-36	134	efflux pump	bicyclomycin
CP032521.1.region006	CP0325210038	ARO:3003801|bcr-1|ALV80601.1	1.3e-39	143	efflux pump	bicyclomycin
CP033066.1.region002	CP0330660007	ARO:3003801|bcr-1|ALV80601.1	5.65e-45	157	efflux pump	bicyclomycin
CP033581.1.region001	CP0335810017	ARO:3003801|bcr-1|ALV80601.1	3.51e-65	211	efflux pump	bicyclomycin
CP035310.1.region004	CP0353100017	ARO:3003801|bcr-1|ALV80601.1	3.68e-38	139	efflux pump	bicyclomycin
CP036313.1.region006	CP0363130008	ARO:3003801|bcr-1|ALV80601.1	3.29e-45	158	efflux pump	bicyclomycin
CP041222.1.region004	CP0412220019	ARO:3003801|bcr-1|ALV80601.1	5.12e-32	122	efflux pump	bicyclomycin
CP041326.1.region003	CP0413260001	ARO:3003801|bcr-1|ALV80601.1	7.64e-39	140	efflux pump	bicyclomycin
CP043550.1.region002	CP0435500056	ARO:3003801|bcr-1|ALV80601.1	4.47e-35	130	efflux pump	bicyclomycin
CP043552.1.region001	CP0435520024	ARO:3003801|bcr-1|ALV80601.1	4.47e-35	130	efflux pump	bicyclomycin
CP045392.1.region004	CP0453920014	ARO:3003801|bcr-1|ALV80601.1	4.46e-42	149	efflux pump	bicyclomycin
CP047670.1.region003	CP0476700040	ARO:3003801|bcr-1|ALV80601.1	3.49e-40	144	efflux pump	bicyclomycin
CP048882.1.region020	CP0488820023	ARO:3003801|bcr-1|ALV80601.1	2.64e-52	179	efflux pump	bicyclomycin
CP054920.1.region010	CP0549200012	ARO:3003801|bcr-1|ALV80601.1	1.59e-44	157	efflux pump	bicyclomycin
CP054929.1.region010	CP0549290008	ARO:3003801|bcr-1|ALV80601.1	2.14e-59	196	efflux pump	bicyclomycin
CP060052.1.region004	CP0600520011	ARO:3003801|bcr-1|ALV80601.1	2.85e-42	150	efflux pump	bicyclomycin
CP061938.1.region012	CP0619380029	ARO:3003801|bcr-1|ALV80601.1	2.38e-63	206	efflux pump	bicyclomycin
CP065229.1.region002	CP0652290016	ARO:3003801|bcr-1|ALV80601.1	6.08e-35	130	efflux pump	bicyclomycin
FR856862.1.region002	FR8568620010	ARO:3003801|bcr-1|ALV80601.1	1.03e-37	138	efflux pump	bicyclomycin
LS483250.1.region003	LS4832500009	ARO:3003801|bcr-1|ALV80601.1	2.51e-44	156	efflux pump	bicyclomycin
LT605585.1.region003	LT6055850039	ARO:3003801|bcr-1|ALV80601.1	3.44e-41	147	efflux pump	bicyclomycin
LT702999.1.region001	LT7029990016	ARO:3003801|bcr-1|ALV80601.1	5.6e-36	134	efflux pump	bicyclomycin
CP038469.1.region002	CP0384690027	ARO:3000823|ramA|AFK13828.1	3.93e-77	220	efflux pump	carbapenem;cephalosporin;cephamycin;fluoroquinolone antibiotic;glycylcycline;monobactam;penam;penem;phenicol antibiotic;rifamycin antibiotic;tetracycline antibiotic;triclosan
CP000356.1.region003	CP0003560027	ARO:3000504|golS|AAL19308.1	4.6e-41	131	efflux pump	carbapenem;cephalosporin;cephamycin;monobactam;penam;penem;phenicol antibiotic
CP003147.1.region002	CP0031470014	ARO:3000504|golS|AAL19308.1	1.11e-36	120	efflux pump	carbapenem;cephalosporin;cephamycin;monobactam;penam;penem;phenicol antibiotic
CP018632.1.region009	CP0186320028	ARO:3000504|golS|AAL19308.1	3.59e-37	121	efflux pump	carbapenem;cephalosporin;cephamycin;monobactam;penam;penem;phenicol antibiotic
CP032618.1.region009	CP0326180056	ARO:3000504|golS|AAL19308.1	8.89e-48	149	efflux pump	carbapenem;cephalosporin;cephamycin;monobactam;penam;penem;phenicol antibiotic
CP047130.1.region003	CP0471300017	ARO:3000504|golS|AAL19308.1	2.56e-42	134	efflux pump	carbapenem;cephalosporin;cephamycin;monobactam;penam;penem;phenicol antibiotic
LT629784.1.region006	LT6297840026	ARO:3000504|golS|AAL19308.1	5.05e-39	126	efflux pump	carbapenem;cephalosporin;cephamycin;monobactam;penam;penem;phenicol antibiotic
CP005973.1.region002	CP0059730024	ARO:3000676|H-NS|BAB35162.1	2.85e-40	128	efflux pump	cephalosporin;cephamycin;fluoroquinolone antibiotic;macrolide antibiotic;penam;tetracycline antibiotic
CP000302.1.region005	CP0003020014	ARO:3000216|acrB|AAC73564.1	1.24e-35	143	efflux pump	cephalosporin;fluoroquinolone antibiotic;glycylcycline;penam;phenicol antibiotic;rifamycin antibiotic;tetracycline antibiotic;triclosan
CP013021.1.region007	CP0130210009	ARO:3000826|sdiA|AAL20862.1	5.84e-36	124	efflux pump	cephalosporin;fluoroquinolone antibiotic;glycylcycline;penam;phenicol antibiotic;rifamycin antibiotic;tetracycline antibiotic;triclosan
CP013189.1.region002	CP0131890003	ARO:3005040|YajC|TKW44661.1	2.07e-40	127	efflux pump	cephalosporin;fluoroquinolone antibiotic;glycylcycline;penam;phenicol antibiotic;rifamycin antibiotic;tetracycline antibiotic;triclosan
CP013611.1.region006	CP0136110028	ARO:3000216|acrB|AAC73564.1	5.68e-49	186	efflux pump	cephalosporin;fluoroquinolone antibiotic;glycylcycline;penam;phenicol antibiotic;rifamycin antibiotic;tetracycline antibiotic;triclosan
CP022525.1.region003	CP0225250012	ARO:3000826|sdiA|AAL20862.1	2.42e-70	213	efflux pump	cephalosporin;fluoroquinolone antibiotic;glycylcycline;penam;phenicol antibiotic;rifamycin antibiotic;tetracycline antibiotic;triclosan
CP022525.1.region008	CP0225250013	ARO:3004043|Escherichia|AAC73565.1	4.02e-35	130	efflux pump	cephalosporin;fluoroquinolone antibiotic;glycylcycline;penam;phenicol antibiotic;rifamycin antibiotic;tetracycline antibiotic;triclosan
CP022526.1.region006	CP0225260012	ARO:3000826|sdiA|AAL20862.1	2.42e-70	213	efflux pump	cephalosporin;fluoroquinolone antibiotic;glycylcycline;penam;phenicol antibiotic;rifamycin antibiotic;tetracycline antibiotic;triclosan
CP022526.1.region011	CP0225260012	ARO:3004043|Escherichia|AAC73565.1	4.02e-35	130	efflux pump	cephalosporin;fluoroquinolone antibiotic;glycylcycline;penam;phenicol antibiotic;rifamycin antibiotic;tetracycline antibiotic;triclosan
CP030092.1.region008	CP0300920008	ARO:3000826|sdiA|AAL20862.1	1.51e-35	123	efflux pump	cephalosporin;fluoroquinolone antibiotic;glycylcycline;penam;phenicol antibiotic;rifamycin antibiotic;tetracycline antibiotic;triclosan
CP030092.1.region002	CP0300920011	ARO:3000826|sdiA|AAL20862.1	8.78e-35	121	efflux pump	cephalosporin;fluoroquinolone antibiotic;glycylcycline;penam;phenicol antibiotic;rifamycin antibiotic;tetracycline antibiotic;triclosan
CP032618.1.region007	CP0326180013	ARO:3000826|sdiA|AAL20862.1	2.42e-58	182	efflux pump	cephalosporin;fluoroquinolone antibiotic;glycylcycline;penam;phenicol antibiotic;rifamycin antibiotic;tetracycline antibiotic;triclosan
CP042914.1.region008	CP0429140029	ARO:3000216|acrB|AAC73564.1	1.29e-34	140	efflux pump	cephalosporin;fluoroquinolone antibiotic;glycylcycline;penam;phenicol antibiotic;rifamycin antibiotic;tetracycline antibiotic;triclosan
CP042994.1.region007	CP0429940023	ARO:3000826|sdiA|AAL20862.1	5.52e-31	111	efflux pump	cephalosporin;fluoroquinolone antibiotic;glycylcycline;penam;phenicol antibiotic;rifamycin antibiotic;tetracycline antibiotic;triclosan
CP051625.1.region004	CP0516250004	ARO:3005040|YajC|TKW44661.1	4.08e-47	144	efflux pump	cephalosporin;fluoroquinolone antibiotic;glycylcycline;penam;phenicol antibiotic;rifamycin antibiotic;tetracycline antibiotic;triclosan
AM286690.1.region002	AM2866900034	ARO:3005069|rsmA|AAC16242.1	1.55e-33	106	efflux pump	diaminopyrimidine antibiotic;fluoroquinolone antibiotic;phenicol antibiotic
AP014545.1.region001	AP0145450025	ARO:3005069|rsmA|AAC16242.1	5.06e-35	109	efflux pump	diaminopyrimidine antibiotic;fluoroquinolone antibiotic;phenicol antibiotic
CP017599.1.region012	CP0175990047	ARO:3000804|MexF|AAG05882.1	8.37e-31	122	efflux pump	diaminopyrimidine antibiotic;fluoroquinolone antibiotic;phenicol antibiotic
CP031010.1.region002	CP0310100003	ARO:3005069|rsmA|AAC16242.1	8.73e-34	107	efflux pump	diaminopyrimidine antibiotic;fluoroquinolone antibiotic;phenicol antibiotic
CP032351.1.region002	CP0323510035	ARO:3005069|rsmA|AAC16242.1	1.55e-33	106	efflux pump	diaminopyrimidine antibiotic;fluoroquinolone antibiotic;phenicol antibiotic
CP040656.1.region010	CP0406560002	ARO:3005069|rsmA|AAC16242.1	5.6e-31	100	efflux pump	diaminopyrimidine antibiotic;fluoroquinolone antibiotic;phenicol antibiotic
AM286690.1.region002	AM2866900030	ARO:3005098|qacL|AAZ42322	6.47e-37	118	efflux pump	disinfecting agents and intercalating dyes
CP032351.1.region002	CP0323510032	ARO:3005098|qacL|AAZ42322	6.08e-37	118	efflux pump	disinfecting agents and intercalating dyes
WUAG01000002.1.region001	WUAG010000020010	ARO:3005098|qacL|AAZ42322	8.14e-31	102	efflux pump	disinfecting agents and intercalating dyes
AP017900.1.region016	AP0179000002	ARO:3001313|facT|AFK80333.1	4.85e-40	148	efflux pump	elfamycin antibiotic
CP011492.1.region003	CP0114920017	ARO:3001313|facT|AFK80333.1	3.95e-88	277	efflux pump	elfamycin antibiotic
CP016076.1.region009	CP0160760020	ARO:3001313|facT|AFK80333.1	2.46e-33	129	efflux pump	elfamycin antibiotic
CP016077.1.region009	CP0160770020	ARO:3001313|facT|AFK80333.1	2.46e-33	129	efflux pump	elfamycin antibiotic
CP017839.1.region017	CP0178390002	ARO:3001313|facT|AFK80333.1	2.62e-40	149	efflux pump	elfamycin antibiotic
CP029188.1.region029	CP0291880012	ARO:3001313|facT|AFK80333.1	2.53e-57	196	efflux pump	elfamycin antibiotic
CP029188.1.region013	CP0291880022	ARO:3001313|facT|AFK80333.1	3.46e-45	162	efflux pump	elfamycin antibiotic
CP029241.1.region011	CP0292410008	ARO:3001313|facT|AFK80333.1	3.69e-48	172	efflux pump	elfamycin antibiotic
CP034587.1.region038	CP0345870031	ARO:3001313|facT|AFK80333.1	4.91e-64	214	efflux pump	elfamycin antibiotic
CP035952.1.region006	CP0359520010	ARO:3001313|facT|AFK80333.1	3.08e-31	124	efflux pump	elfamycin antibiotic
CP036534.1.region008	CP0365340021	ARO:3001313|facT|AFK80333.1	4.91e-64	214	efflux pump	elfamycin antibiotic
CP038469.1.region002	CP0384690033	ARO:3001313|facT|AFK80333.1	2.7e-51	180	efflux pump	elfamycin antibiotic
CP043317.1.region030	CP0433170023	ARO:3001313|facT|AFK80333.1	2.19e-63	212	efflux pump	elfamycin antibiotic
CP054938.1.region011	CP0549380016	ARO:3001313|facT|AFK80333.1	2.85e-56	193	efflux pump	elfamycin antibiotic
AP008957.1.region012	AP0089570024	ARO:3003967|lrfA|AAC43550.1	1.6e-44	162	efflux pump	fluoroquinolone antibiotic
AP017900.1.region023	AP0179000005	ARO:3000074|emrB|AAC75733.1	2.69e-31	122	efflux pump	fluoroquinolone antibiotic
AP017900.1.region013	AP0179000007	ARO:3003047|qacB|AAQ10694.1	1.99e-31	124	efflux pump	fluoroquinolone antibiotic
AP017900.1.region026	AP0179000016	ARO:3003967|lrfA|AAC43550.1	3.4e-37	141	efflux pump	fluoroquinolone antibiotic
AP017900.1.region014	AP0179000033	ARO:3003967|lrfA|AAC43550.1	1.97e-99	306	efflux pump	fluoroquinolone antibiotic
AP017900.1.region010	AP0179000038	ARO:3003967|lrfA|AAC43550.1	1.66e-55	190	efflux pump	fluoroquinolone antibiotic
AP018165.1.region009	AP0181650012	ARO:3003047|qacB|AAQ10694.1	9.78e-36	136	efflux pump	fluoroquinolone antibiotic
AP018165.1.region007	AP0181650023	ARO:3000074|emrB|AAC75733.1	2.05e-41	152	efflux pump	fluoroquinolone antibiotic
AP018165.1.region007	AP0181650030	ARO:3003967|lrfA|AAC43550.1	1.41e-77	249	efflux pump	fluoroquinolone antibiotic
AP018410.1.region009	AP0184100024	ARO:3000074|emrB|AAC75733.1	1.56e-39	147	efflux pump	fluoroquinolone antibiotic
AP018410.1.region001	AP0184100029	ARO:3000074|emrB|AAC75733.1	3.94e-40	148	efflux pump	fluoroquinolone antibiotic
AP018410.1.region014	AP0184100031	ARO:3000074|emrB|AAC75733.1	6.41e-47	168	efflux pump	fluoroquinolone antibiotic
AP018410.1.region018	AP0184100038	ARO:3000074|emrB|AAC75733.1	9.46e-41	151	efflux pump	fluoroquinolone antibiotic
BA000028.3.region003	BA0000280023	ARO:3000074|emrB|AAC75733.1	3.15e-34	131	efflux pump	fluoroquinolone antibiotic
BA000043.1.region005	BA0000430019	ARO:3000074|emrB|AAC75733.1	4.21e-49	175	efflux pump	fluoroquinolone antibiotic
CM002271.1.region016	CM0022710016	ARO:3003967|lrfA|AAC43550.1	4.06e-58	198	efflux pump	fluoroquinolone antibiotic
CM002271.1.region021	CM0022710022	ARO:3000074|emrB|AAC75733.1	1.38e-38	143	efflux pump	fluoroquinolone antibiotic
CM002271.1.region004	CM0022710025	ARO:3000074|emrB|AAC75733.1	1.82e-36	140	efflux pump	fluoroquinolone antibiotic
CM002271.1.region024	CM0022710055	ARO:3003967|lrfA|AAC43550.1	4.69e-106	323	efflux pump	fluoroquinolone antibiotic
CM002273.1.region017	CM0022730016	ARO:3003967|lrfA|AAC43550.1	4.06e-58	198	efflux pump	fluoroquinolone antibiotic
CM002273.1.region022	CM0022730020	ARO:3000074|emrB|AAC75733.1	1.35e-39	146	efflux pump	fluoroquinolone antibiotic
CM002273.1.region004	CM0022730025	ARO:3000074|emrB|AAC75733.1	6.95e-36	139	efflux pump	fluoroquinolone antibiotic
CM002273.1.region015	CM0022730033	ARO:3001216|mdtH|AAC74149.2	1.92e-38	140	efflux pump	fluoroquinolone antibiotic
CM002273.1.region025	CM0022730054	ARO:3003967|lrfA|AAC43550.1	4.69e-106	323	efflux pump	fluoroquinolone antibiotic
CP000020.2.region001	CP0000200043	ARO:3000074|emrB|AAC75733.1	2.23e-73	239	efflux pump	fluoroquinolone antibiotic
CP000282.1.region006	CP0002820009	ARO:3000074|emrB|AAC75733.1	4.67e-63	211	efflux pump	fluoroquinolone antibiotic
CP000514.1.region003	CP0005140005	ARO:3000074|emrB|AAC75733.1	3.64e-50	177	efflux pump	fluoroquinolone antibiotic
CP000667.1.region018	CP0006670006	ARO:3000074|emrB|AAC75733.1	4.97e-48	171	efflux pump	fluoroquinolone antibiotic
CP000667.1.region014	CP0006670015	ARO:3003967|lrfA|AAC43550.1	6.47e-102	315	efflux pump	fluoroquinolone antibiotic
CP000667.1.region006	CP0006670040	ARO:3003047|qacB|AAQ10694.1	4.69e-36	136	efflux pump	fluoroquinolone antibiotic
CP000667.1.region009	CP0006670042	ARO:3003967|lrfA|AAC43550.1	2.04e-59	201	efflux pump	fluoroquinolone antibiotic
CP000667.1.region013	CP0006670042	ARO:3003967|lrfA|AAC43550.1	4.62e-95	295	efflux pump	fluoroquinolone antibiotic
CP000667.1.region013	CP0006670059	ARO:3003967|lrfA|AAC43550.1	1.54e-111	336	efflux pump	fluoroquinolone antibiotic
CP000667.1.region014	CP0006670072	ARO:3003967|lrfA|AAC43550.1	3.95e-33	129	efflux pump	fluoroquinolone antibiotic
CP002377.1.region004	CP0023770004	ARO:3000074|emrB|AAC75733.1	7.02e-131	387	efflux pump	fluoroquinolone antibiotic
CP002377.1.region005	CP0023770014	ARO:3000074|emrB|AAC75733.1	4.15e-94	292	efflux pump	fluoroquinolone antibiotic
CP002638.1.region007	CP0026380002	ARO:3003967|lrfA|AAC43550.1	1.35e-104	319	efflux pump	fluoroquinolone antibiotic
CP002638.1.region003	CP0026380007	ARO:3000074|emrB|AAC75733.1	2.73e-31	124	efflux pump	fluoroquinolone antibiotic
CP002638.1.region006	CP0026380019	ARO:3000074|emrB|AAC75733.1	5.01e-43	156	efflux pump	fluoroquinolone antibiotic
CP002771.1.region003	CP0027710032	ARO:3001216|mdtH|AAC74149.2	1.89e-31	120	efflux pump	fluoroquinolone antibiotic
CP003053.1.region003	CP0030530017	ARO:3003967|lrfA|AAC43550.1	7.28e-40	148	efflux pump	fluoroquinolone antibiotic
CP003169.1.region004	CP0031690004	ARO:3003967|lrfA|AAC43550.1	4.19e-45	164	efflux pump	fluoroquinolone antibiotic
CP003169.1.region014	CP0031690006	ARO:3000074|emrB|AAC75733.1	3.33e-31	125	efflux pump	fluoroquinolone antibiotic
CP003169.1.region018	CP0031690018	ARO:3003967|lrfA|AAC43550.1	3e-32	126	efflux pump	fluoroquinolone antibiotic
CP003169.1.region015	CP0031690020	ARO:3000074|emrB|AAC75733.1	2.26e-39	147	efflux pump	fluoroquinolone antibiotic
CP006643.1.region003	CP0066430010	ARO:3001327|mdtK|AML99881.1	9.19e-33	126	efflux pump	fluoroquinolone antibiotic
CP007220.1.region011	CP0072200013	ARO:3000074|emrB|AAC75733.1	7.52e-31	122	efflux pump	fluoroquinolone antibiotic
CP007220.1.region009	CP0072200020	ARO:3000074|emrB|AAC75733.1	5.76e-42	154	efflux pump	fluoroquinolone antibiotic
CP007220.1.region005	CP0072200021	ARO:3003967|lrfA|AAC43550.1	4.39e-52	181	efflux pump	fluoroquinolone antibiotic
CP007220.1.region009	CP0072200028	ARO:3003967|lrfA|AAC43550.1	8.93e-77	247	efflux pump	fluoroquinolone antibiotic
CP009265.2.region001	CP0092650019	ARO:3000074|emrB|AAC75733.1	8.25e-56	192	efflux pump	fluoroquinolone antibiotic
CP009416.1.region001	CP0094160010	ARO:3001327|mdtK|AML99881.1	3.63e-40	147	efflux pump	fluoroquinolone antibiotic
CP009618.1.region002	CP0096180018	ARO:3000074|emrB|AAC75733.1	6.23e-57	195	efflux pump	fluoroquinolone antibiotic
CP010406.1.region008	CP0104060024	ARO:3003047|qacB|AAQ10694.1	1.16e-33	129	efflux pump	fluoroquinolone antibiotic
CP010797.1.region012	CP0107970001	ARO:3003967|lrfA|AAC43550.1	5.66e-47	167	efflux pump	fluoroquinolone antibiotic
CP010797.1.region010	CP0107970003	ARO:3000074|emrB|AAC75733.1	1.43e-31	124	efflux pump	fluoroquinolone antibiotic
CP010797.1.region003	CP0107970012	ARO:3003047|qacB|AAQ10694.1	8.21e-40	147	efflux pump	fluoroquinolone antibiotic
CP010797.1.region015	CP0107970020	ARO:3003967|lrfA|AAC43550.1	9.37e-35	134	efflux pump	fluoroquinolone antibiotic
CP010797.1.region010	CP0107970035	ARO:3003967|lrfA|AAC43550.1	1.77e-32	127	efflux pump	fluoroquinolone antibiotic
CP011034.1.region001	CP0110340020	ARO:3003047|qacB|AAQ10694.1	3.71e-34	131	efflux pump	fluoroquinolone antibiotic
CP011310.1.region002	CP0113100001	ARO:3000074|emrB|AAC75733.1	4.29e-66	219	efflux pump	fluoroquinolone antibiotic
CP011492.1.region018	CP0114920002	ARO:3003967|lrfA|AAC43550.1	1.34e-31	124	efflux pump	fluoroquinolone antibiotic
CP011492.1.region010	CP0114920008	ARO:3003047|qacB|AAQ10694.1	8.78e-49	172	efflux pump	fluoroquinolone antibiotic
CP011492.1.region018	CP0114920011	ARO:3003967|lrfA|AAC43550.1	3.62e-35	135	efflux pump	fluoroquinolone antibiotic
CP011492.1.region013	CP0114920018	ARO:3003967|lrfA|AAC43550.1	7.49e-33	128	efflux pump	fluoroquinolone antibiotic
CP011492.1.region009	CP0114920019	ARO:3003967|lrfA|AAC43550.1	3.56e-103	315	efflux pump	fluoroquinolone antibiotic
CP011492.1.region022	CP0114920040	ARO:3003967|lrfA|AAC43550.1	1.65e-31	124	efflux pump	fluoroquinolone antibiotic
CP011832.1.region002	CP0118320018	ARO:3000074|emrB|AAC75733.1	2.93e-48	172	efflux pump	fluoroquinolone antibiotic
CP011929.1.region006	CP0119290005	ARO:3000074|emrB|AAC75733.1	1.94e-48	172	efflux pump	fluoroquinolone antibiotic
CP013611.1.region001	CP0136110003	ARO:3001216|mdtH|AAC74149.2	5.01e-38	139	efflux pump	fluoroquinolone antibiotic
CP014859.1.region016	CP0148590006	ARO:3003967|lrfA|AAC43550.1	1.25e-76	246	efflux pump	fluoroquinolone antibiotic
CP014859.1.region002	CP0148590008	ARO:3000074|emrB|AAC75733.1	4.12e-39	148	efflux pump	fluoroquinolone antibiotic
CP014859.1.region011	CP0148590048	ARO:3004574|Acinetobacter|ACJ41547.2	1.49e-112	337	efflux pump	fluoroquinolone antibiotic
CP015163.1.region027	CP0151630012	ARO:3000074|emrB|AAC75733.1	5.24e-53	184	efflux pump	fluoroquinolone antibiotic
CP015163.1.region001	CP0151630016	ARO:3004574|Acinetobacter|ACJ41547.2	1.18e-81	256	efflux pump	fluoroquinolone antibiotic
CP015163.1.region009	CP0151630017	ARO:3003967|lrfA|AAC43550.1	4.66e-73	237	efflux pump	fluoroquinolone antibiotic
CP015163.1.region011	CP0151630020	ARO:3000074|emrB|AAC75733.1	1.46e-39	146	efflux pump	fluoroquinolone antibiotic
CP015163.1.region025	CP0151630030	ARO:3003967|lrfA|AAC43550.1	3.42e-104	319	efflux pump	fluoroquinolone antibiotic
CP015381.1.region005	CP0153810057	ARO:3000074|emrB|AAC75733.1	2.52e-36	138	efflux pump	fluoroquinolone antibiotic
CP016076.1.region028	CP0160760011	ARO:3003967|lrfA|AAC43550.1	5.03e-42	154	efflux pump	fluoroquinolone antibiotic
CP016076.1.region018	CP0160760019	ARO:3003967|lrfA|AAC43550.1	1.51e-93	291	efflux pump	fluoroquinolone antibiotic
CP016077.1.region026	CP0160770011	ARO:3003967|lrfA|AAC43550.1	5.83e-42	154	efflux pump	fluoroquinolone antibiotic
CP016077.1.region017	CP0160770019	ARO:3003967|lrfA|AAC43550.1	1.51e-93	291	efflux pump	fluoroquinolone antibiotic
CP016557.1.region001	CP0165570019	ARO:3000074|emrB|AAC75733.1	3.82e-56	193	efflux pump	fluoroquinolone antibiotic
CP017014.1.region011	CP0170140002	ARO:3000074|emrB|AAC75733.1	2.41e-36	139	efflux pump	fluoroquinolone antibiotic
CP017839.1.region018	CP0178390002	ARO:3003047|qacB|AAQ10694.1	3.65e-32	125	efflux pump	fluoroquinolone antibiotic
CP017839.1.region023	CP0178390004	ARO:3000074|emrB|AAC75733.1	1.88e-31	123	efflux pump	fluoroquinolone antibiotic
CP017839.1.region015	CP0178390009	ARO:3003967|lrfA|AAC43550.1	3.04e-99	306	efflux pump	fluoroquinolone antibiotic
CP017839.1.region003	CP0178390036	ARO:3003967|lrfA|AAC43550.1	3.4e-37	141	efflux pump	fluoroquinolone antibiotic
CP017839.1.region009	CP0178390037	ARO:3003967|lrfA|AAC43550.1	1.49e-55	190	efflux pump	fluoroquinolone antibiotic
CP017965.1.region005	CP0179650001	ARO:3003967|lrfA|AAC43550.1	8.56e-66	218	efflux pump	fluoroquinolone antibiotic
CP018047.1.region006	CP0180470033	ARO:3003967|lrfA|AAC43550.1	8.09e-37	139	efflux pump	fluoroquinolone antibiotic
CP018047.1.region028	CP0180470033	ARO:3003967|lrfA|AAC43550.1	2.93e-108	329	efflux pump	fluoroquinolone antibiotic
CP018047.1.region028	CP0180470037	ARO:3003967|lrfA|AAC43550.1	4.49e-101	310	efflux pump	fluoroquinolone antibiotic
CP018047.1.region010	CP0180470040	ARO:3003967|lrfA|AAC43550.1	8.78e-33	127	efflux pump	fluoroquinolone antibiotic
CP018047.1.region001	CP0180470043	ARO:3003047|qacB|AAQ10694.1	1.13e-43	157	efflux pump	fluoroquinolone antibiotic
CP018047.1.region001	CP0180470047	ARO:3001216|mdtH|AAC74149.2	3.5e-35	131	efflux pump	fluoroquinolone antibiotic
CP018197.1.region005	CP0181970013	ARO:3001327|mdtK|AML99881.1	6.33e-37	138	efflux pump	fluoroquinolone antibiotic
CP018572.1.region003	CP0185720020	ARO:3000074|emrB|AAC75733.1	8.82e-33	127	efflux pump	fluoroquinolone antibiotic
CP018836.1.region001	CP0188360010	ARO:3000074|emrB|AAC75733.1	4.93e-32	125	efflux pump	fluoroquinolone antibiotic
CP020454.1.region001	CP0204540019	ARO:3000074|emrB|AAC75733.1	2.15e-56	194	efflux pump	fluoroquinolone antibiotic
CP020570.1.region014	CP0205700003	ARO:3003967|lrfA|AAC43550.1	1.21e-33	130	efflux pump	fluoroquinolone antibiotic
CP020570.1.region014	CP0205700009	ARO:3003967|lrfA|AAC43550.1	6.18e-44	159	efflux pump	fluoroquinolone antibiotic
CP020570.1.region024	CP0205700012	ARO:3003967|lrfA|AAC43550.1	3.09e-108	329	efflux pump	fluoroquinolone antibiotic
CP020570.1.region031	CP0205700022	ARO:3003967|lrfA|AAC43550.1	3.57e-39	146	efflux pump	fluoroquinolone antibiotic
CP020570.1.region004	CP0205700023	ARO:3000074|emrB|AAC75733.1	4.98e-43	156	efflux pump	fluoroquinolone antibiotic
CP020570.1.region020	CP0205700029	ARO:3003967|lrfA|AAC43550.1	1.38e-39	147	efflux pump	fluoroquinolone antibiotic
CP020570.1.region010	CP0205700031	ARO:3000074|emrB|AAC75733.1	6.6e-32	125	efflux pump	fluoroquinolone antibiotic
CP020570.1.region027	CP0205700043	ARO:3003967|lrfA|AAC43550.1	3.83e-51	179	efflux pump	fluoroquinolone antibiotic
CP021112.1.region004	CP0211120020	ARO:3000074|emrB|AAC75733.1	3.5e-54	188	efflux pump	fluoroquinolone antibiotic
CP021112.1.region004	CP0211120026	ARO:3000074|emrB|AAC75733.1	1.48e-100	310	efflux pump	fluoroquinolone antibiotic
CP021121.1.region004	CP0211210003	ARO:3003967|lrfA|AAC43550.1	1.84e-49	173	efflux pump	fluoroquinolone antibiotic
CP021121.1.region010	CP0211210025	ARO:3003967|lrfA|AAC43550.1	8.84e-40	147	efflux pump	fluoroquinolone antibiotic
CP021121.1.region019	CP0211210028	ARO:3003967|lrfA|AAC43550.1	4.74e-109	331	efflux pump	fluoroquinolone antibiotic
CP021333.1.region008	CP0213330006	ARO:3000074|emrB|AAC75733.1	3.64e-50	177	efflux pump	fluoroquinolone antibiotic
CP021707.1.region008	CP0217070004	ARO:3003967|lrfA|AAC43550.1	2.27e-122	365	efflux pump	fluoroquinolone antibiotic
CP021707.1.region025	CP0217070026	ARO:3003967|lrfA|AAC43550.1	5.74e-34	132	efflux pump	fluoroquinolone antibiotic
CP021707.1.region015	CP0217070067	ARO:3003967|lrfA|AAC43550.1	2.72e-31	123	efflux pump	fluoroquinolone antibiotic
CP021780.1.region002	CP0217800017	ARO:3003967|lrfA|AAC43550.1	4.45e-78	250	efflux pump	fluoroquinolone antibiotic
CP022103.1.region003	CP0221030028	ARO:3000074|emrB|AAC75733.1	1.46e-124	371	efflux pump	fluoroquinolone antibiotic
CP022525.1.region007	CP0225250039	ARO:3000074|emrB|AAC75733.1	1.21e-60	204	efflux pump	fluoroquinolone antibiotic
CP022526.1.region010	CP0225260039	ARO:3000074|emrB|AAC75733.1	1.21e-60	204	efflux pump	fluoroquinolone antibiotic
CP023179.1.region007	CP0231790020	ARO:3000074|emrB|AAC75733.1	1.47e-42	155	efflux pump	fluoroquinolone antibiotic
CP024052.1.region001	CP0240520003	ARO:3003967|lrfA|AAC43550.1	1.81e-58	198	efflux pump	fluoroquinolone antibiotic
CP024052.1.region002	CP0240520044	ARO:3003047|qacB|AAQ10694.1	9.97e-34	132	efflux pump	fluoroquinolone antibiotic
CP024200.1.region003	CP0242000006	ARO:3000074|emrB|AAC75733.1	1.55e-33	129	efflux pump	fluoroquinolone antibiotic
CP024315.1.region007	CP0243150034	ARO:3003967|lrfA|AAC43550.1	2.54e-120	360	efflux pump	fluoroquinolone antibiotic
CP025407.1.region020	CP0254070007	ARO:3003967|lrfA|AAC43550.1	1.25e-99	306	efflux pump	fluoroquinolone antibiotic
CP025407.1.region016	CP0254070010	ARO:3003967|lrfA|AAC43550.1	2.26e-32	126	efflux pump	fluoroquinolone antibiotic
CP025407.1.region018	CP0254070010	ARO:3003047|qacB|AAQ10694.1	2.69e-47	169	efflux pump	fluoroquinolone antibiotic
CP025407.1.region023	CP0254070019	ARO:3003967|lrfA|AAC43550.1	1.34e-33	130	efflux pump	fluoroquinolone antibiotic
CP025407.1.region024	CP0254070024	ARO:3003967|lrfA|AAC43550.1	1.92e-66	220	efflux pump	fluoroquinolone antibiotic
CP025407.1.region006	CP0254070045	ARO:3003967|lrfA|AAC43550.1	2.21e-70	230	efflux pump	fluoroquinolone antibiotic
CP025407.1.region012	CP0254070051	ARO:3003967|lrfA|AAC43550.1	7.34e-36	136	efflux pump	fluoroquinolone antibiotic
CP025407.1.region006	CP0254070059	ARO:3004103|QepA2|ACF70723.1	4.82e-31	122	efflux pump	fluoroquinolone antibiotic
CP025407.1.region012	CP0254070060	ARO:3003967|lrfA|AAC43550.1	4.16e-32	125	efflux pump	fluoroquinolone antibiotic
CP025407.1.region017	CP0254070071	ARO:3001216|mdtH|AAC74149.2	1.8e-35	132	efflux pump	fluoroquinolone antibiotic
CP025990.1.region006	CP0259900055	ARO:3003967|lrfA|AAC43550.1	4.52e-50	176	efflux pump	fluoroquinolone antibiotic
CP025990.1.region026	CP0259900213	ARO:3003967|lrfA|AAC43550.1	2.82e-86	272	efflux pump	fluoroquinolone antibiotic
CP027796.1.region003	CP0277960004	ARO:3001327|mdtK|AML99881.1	0	716	efflux pump	fluoroquinolone antibiotic
CP027798.1.region002	CP0277980030	ARO:3001327|mdtK|AML99881.1	0	716	efflux pump	fluoroquinolone antibiotic
CP028158.1.region017	CP0281580007	ARO:3003967|lrfA|AAC43550.1	1.96e-32	126	efflux pump	fluoroquinolone antibiotic
CP028158.1.region003	CP0281580021	ARO:3000024|patA|AAK76137.1	4.59e-34	133	efflux pump	fluoroquinolone antibiotic
CP028159.1.region001	CP0281590020	ARO:3000024|patA|AAK76137.1	1.05e-33	132	efflux pump	fluoroquinolone antibiotic
CP028159.1.region011	CP0281590031	ARO:3003967|lrfA|AAC43550.1	1.96e-32	126	efflux pump	fluoroquinolone antibiotic
CP028897.1.region001	CP0288970029	ARO:3000074|emrB|AAC75733.1	4.21e-51	177	efflux pump	fluoroquinolone antibiotic
CP028901.1.region003	CP0289010011	ARO:3003967|lrfA|AAC43550.1	2.81e-56	187	efflux pump	fluoroquinolone antibiotic
CP029043.1.region007	CP0290430037	ARO:3000074|emrB|AAC75733.1	1.55e-32	127	efflux pump	fluoroquinolone antibiotic
CP029188.1.region024	CP0291880005	ARO:3003967|lrfA|AAC43550.1	4.06e-43	157	efflux pump	fluoroquinolone antibiotic
CP029188.1.region029	CP0291880017	ARO:3003967|lrfA|AAC43550.1	5.95e-92	287	efflux pump	fluoroquinolone antibiotic
CP029188.1.region023	CP0291880032	ARO:3003047|qacB|AAQ10694.1	8.83e-32	124	efflux pump	fluoroquinolone antibiotic
CP029188.1.region023	CP0291880033	ARO:3003967|lrfA|AAC43550.1	1.89e-37	141	efflux pump	fluoroquinolone antibiotic
CP029241.1.region017	CP0292410025	ARO:3003967|lrfA|AAC43550.1	1.63e-37	141	efflux pump	fluoroquinolone antibiotic
CP029241.1.region013	CP0292410032	ARO:3000074|emrB|AAC75733.1	4.83e-33	128	efflux pump	fluoroquinolone antibiotic
CP029254.1.region002	CP0292540003	ARO:3003047|qacB|AAQ10694.1	3.82e-35	135	efflux pump	fluoroquinolone antibiotic
CP029254.1.region020	CP0292540010	ARO:3003967|lrfA|AAC43550.1	1.6e-40	150	efflux pump	fluoroquinolone antibiotic
CP029254.1.region001	CP0292540023	ARO:3000074|emrB|AAC75733.1	1.88e-33	130	efflux pump	fluoroquinolone antibiotic
CP029254.1.region005	CP0292540048	ARO:3000074|emrB|AAC75733.1	5.12e-31	123	efflux pump	fluoroquinolone antibiotic
CP029495.1.region004	CP0294950002	ARO:3000074|emrB|AAC75733.1	2.23e-137	404	efflux pump	fluoroquinolone antibiotic
CP029609.1.region012	CP0296090007	ARO:3000074|emrB|AAC75733.1	2.06e-31	123	efflux pump	fluoroquinolone antibiotic
CP029803.1.region002	CP0298030013	ARO:3000025|patB|AAK76136.1	1.13e-31	126	efflux pump	fluoroquinolone antibiotic
CP030925.1.region011	CP0309250007	ARO:3000074|emrB|AAC75733.1	2.53e-31	123	efflux pump	fluoroquinolone antibiotic
CP031146.1.region002	CP0311460020	ARO:3000074|emrB|AAC75733.1	9.46e-37	139	efflux pump	fluoroquinolone antibiotic
CP031263.1.region017	CP0312630006	ARO:3003967|lrfA|AAC43550.1	8.97e-58	197	efflux pump	fluoroquinolone antibiotic
CP031473.1.region001	CP0314730019	ARO:3000074|emrB|AAC75733.1	1.26e-55	192	efflux pump	fluoroquinolone antibiotic
CP031642.1.region003	CP0316420020	ARO:3000074|emrB|AAC75733.1	2.76e-42	154	efflux pump	fluoroquinolone antibiotic
CP031643.1.region003	CP0316430020	ARO:3000074|emrB|AAC75733.1	9.73e-42	152	efflux pump	fluoroquinolone antibiotic
CP031969.1.region010	CP0319690018	ARO:3000074|emrB|AAC75733.1	1.12e-31	124	efflux pump	fluoroquinolone antibiotic
CP032365.1.region005	CP0323650020	ARO:3000074|emrB|AAC75733.1	2.57e-43	157	efflux pump	fluoroquinolone antibiotic
CP032618.1.region006	CP0326180014	ARO:3000074|emrB|AAC75733.1	1.17e-60	204	efflux pump	fluoroquinolone antibiotic
CP033434.1.region005	CP0334340022	ARO:3000074|emrB|AAC75733.1	7.02e-54	187	efflux pump	fluoroquinolone antibiotic
CP033442.1.region003	CP0334420016	ARO:3000074|emrB|AAC75733.1	7.02e-54	187	efflux pump	fluoroquinolone antibiotic
CP033446.1.region003	CP0334460018	ARO:3000074|emrB|AAC75733.1	7.31e-54	187	efflux pump	fluoroquinolone antibiotic
CP033450.1.region003	CP0334500017	ARO:3000074|emrB|AAC75733.1	7.31e-54	187	efflux pump	fluoroquinolone antibiotic
CP033581.1.region014	CP0335810003	ARO:3003967|lrfA|AAC43550.1	1.18e-42	155	efflux pump	fluoroquinolone antibiotic
CP033581.1.region008	CP0335810007	ARO:3003967|lrfA|AAC43550.1	2.68e-36	137	efflux pump	fluoroquinolone antibiotic
CP034425.1.region006	CP0344250029	ARO:3004574|Acinetobacter|ACJ41547.2	2.31e-100	305	efflux pump	fluoroquinolone antibiotic
CP034587.1.region002	CP0345870001	ARO:3003967|lrfA|AAC43550.1	5.09e-49	172	efflux pump	fluoroquinolone antibiotic
CP034587.1.region031	CP0345870003	ARO:3003967|lrfA|AAC43550.1	3.78e-37	140	efflux pump	fluoroquinolone antibiotic
CP034587.1.region026	CP0345870005	ARO:3000074|emrB|AAC75733.1	6.44e-32	127	efflux pump	fluoroquinolone antibiotic
CP034587.1.region010	CP0345870013	ARO:3003967|lrfA|AAC43550.1	1.94e-93	290	efflux pump	fluoroquinolone antibiotic
CP034587.1.region034	CP0345870021	ARO:3000074|emrB|AAC75733.1	4.45e-39	145	efflux pump	fluoroquinolone antibiotic
CP034587.1.region001	CP0345870024	ARO:3003967|lrfA|AAC43550.1	7.36e-40	148	efflux pump	fluoroquinolone antibiotic
CP034587.1.region031	CP0345870080	ARO:3003967|lrfA|AAC43550.1	6.07e-71	231	efflux pump	fluoroquinolone antibiotic
CP034835.1.region005	CP0348350032	ARO:3001216|mdtH|AAC74149.2	1.5e-34	129	efflux pump	fluoroquinolone antibiotic
CP035952.1.region005	CP0359520024	ARO:3004574|Acinetobacter|ACJ41547.2	4.07e-94	288	efflux pump	fluoroquinolone antibiotic
CP036455.1.region010	CP0364550017	ARO:3003967|lrfA|AAC43550.1	7.02e-70	229	efflux pump	fluoroquinolone antibiotic
CP036455.1.region008	CP0364550039	ARO:3000074|emrB|AAC75733.1	1.94e-51	179	efflux pump	fluoroquinolone antibiotic
CP036534.1.region021	CP0365340003	ARO:3003967|lrfA|AAC43550.1	3.31e-39	146	efflux pump	fluoroquinolone antibiotic
CP036534.1.region007	CP0365340006	ARO:3003967|lrfA|AAC43550.1	1.85e-56	194	efflux pump	fluoroquinolone antibiotic
CP036534.1.region013	CP0365340009	ARO:3003967|lrfA|AAC43550.1	1.76e-45	163	efflux pump	fluoroquinolone antibiotic
CP036534.1.region016	CP0365340013	ARO:3004574|Acinetobacter|ACJ41547.2	5.8e-86	266	efflux pump	fluoroquinolone antibiotic
CP036534.1.region026	CP0365340017	ARO:3003047|qacB|AAQ10694.1	2.14e-33	129	efflux pump	fluoroquinolone antibiotic
CP036534.1.region026	CP0365340053	ARO:3000074|emrB|AAC75733.1	3.23e-40	148	efflux pump	fluoroquinolone antibiotic
CP036534.1.region001	CP0365340059	ARO:3000074|emrB|AAC75733.1	5.77e-40	149	efflux pump	fluoroquinolone antibiotic
[truncated: 5,079 more rows]

## Sheet: Terpene
Supplementary Table S3. Annotated Information of Resistance Gene of the MarRef Terpenoid-BGCs
Marref_terpene_bgc_id	BGC_cds_id	Subject	Evalue	Bitscore	Resistance Machenism	Putative product class
AE017126.1.region001	AE0171260002	ARO:3002919|vanRA|AAA65953.1	2.4e-45	149	target alteration	glycopeptide antibiotic
AP008957.1.region010	AP0089570009	ARO:3003748|oleC|AAA26793	4.03e-50	166	efflux pump	macrolide antibiotic
AP008957.1.region010	AP0089570023	ARO:3002829|vgaA|AAA26684.1	3.78e-33	129	target protection	lincosamide antibiotic;macrolide antibiotic;oxazolidinone antibiotic;phenicol antibiotic;pleuromutilin antibiotic;streptogramin antibiotic;tetracycline antibiotic
AP014648.1.region007	AP0146480005	ARO:3000378|MexB|AAA74437.1	1.3e-39	156	efflux pump	aminocoumarin antibiotic;carbapenem;cephalosporin;cephamycin;diaminopyrimidine antibiotic;fluoroquinolone antibiotic;macrolide antibiotic;monobactam;penam;penem;peptide antibiotic;phenicol antibiotic;sulfonamide antibiotic;tetracycline antibiotic
AP017900.1.region003	AP0179000030	ARO:3003748|oleC|AAA26793	4.2e-95	283	efflux pump	macrolide antibiotic
AP017900.1.region017	AP0179000036	ARO:3002919|vanRA|AAA65953.1	1.08e-37	129	target alteration	glycopeptide antibiotic
AP017900.1.region023	AP0179000005	ARO:3000074|emrB|AAC75733.1	2.69e-31	122	efflux pump	fluoroquinolone antibiotic
AP018042.1.region003	AP0180420011	HK_VanS_ACDEFG-NCBIFAM|vancomycin resistance histidine kinase VanS	2.9e-32	107.2	target protection
AP018498.1.region005	AP0184980013	ARO:3003801|bcr-1|ALV80601.1	6.88e-35	130	efflux pump	bicyclomycin
AP019389.1.region002	AP0193890007	ARO:3003801|bcr-1|ALV80601.1	1.35e-36	135	efflux pump	bicyclomycin
AP019701.1.region006	AP0197010015	tet_ABC_46_B-NCBIFAM|tetracycline efflux ABC transporter Tet(46) subunit B	3.1e-37	123.5	efflux pump
AP019860.1.region014	AP0198600005	ARO:3003950|msbA|AAC74000.1	3.15e-87	280	efflux pump	nitroimidazole antibiotic
AP019860.1.region021	AP0198600006	ARO:3005008|Txr|AAK37618.1	2.73e-60	197	efflux pump	tetracycline antibiotic
AP023240.1.region001	AP0232400001	ARO:3000378|MexB|AAA74437.1	7.26e-44	168	efflux pump	aminocoumarin antibiotic;carbapenem;cephalosporin;cephamycin;diaminopyrimidine antibiotic;fluoroquinolone antibiotic;macrolide antibiotic;monobactam;penam;penem;peptide antibiotic;phenicol antibiotic;sulfonamide antibiotic;tetracycline antibiotic
AP024154.1.region001	AP0241540001	ARO:3002970|vanTC|AAD22403.1	3.15e-45	170	target alteration	glycopeptide antibiotic
BA000028.3.region001	BA0000280007	ARO:3002700|cmlv|AAB36568.1	5.39e-36	133	product inactivation	phenicol antibiotic
BA000028.3.region001	BA0000280017	ARO:3002987|bcrA|AAA99504.1	1.4e-44	150	efflux pump	peptide antibiotic
BA000028.3.region006	BA0000280002	ARO:3005091|RanA|ADZ12699.1	1.06e-34	125	efflux pump	aminoglycoside antibiotic
BDEL01000001.1.region001	BDEL010000010016	ARO:3002942|vanHA|AAA65955.1	3.37e-57	185	target alteration	glycopeptide antibiotic
BDEL01000001.1.region001	BDEL010000010019	ARO:3000617|mecA|AGC51118.1	3.69e-32	129	target replacement	carbapenem;cephalosporin;cephamycin;monobactam;penam
BX548020.1.region003	BX5480200002	ARO:3002919|vanRA|AAA65953.1	2.5e-48	156	target alteration	glycopeptide antibiotic
BX548174.1.region001	BX5481740003	ARO:3002919|vanRA|AAA65953.1	1.11e-44	147	target alteration	glycopeptide antibiotic
BX548175.1.region005	BX5481750002	ARO:3002919|vanRA|AAA65953.1	4.38e-48	156	target alteration	glycopeptide antibiotic
CM002273.1.region002	CM0022730016	BGC0001611|glyoxalase/bleomycin_resistance_protein|ATY69562.1	5.6e-35	110	product inactivate
CM002273.1.region002	CM0022730018	BGC0001447|Glyoxalase/bleomycin_resistance_protein/dioxygenase|EHK80150.1	2.89e-67	193	product inactivate
CM002273.1.region002	CM0022730050	ARO:3004573|Acinetobacter|ABO11759.2	8.97e-139	403	efflux pump	fosfomycin
CP000095.2.region001	CP0000950003	ARO:3002919|vanRA|AAA65953.1	2.42e-48	156	target alteration	glycopeptide antibiotic
CP000097.1.region001	CP0000970019	ARO:3002919|vanRA|AAA65953.1	5.67e-48	155	target alteration	glycopeptide antibiotic
CP000111.1.region001	CP0001110003	ARO:3002919|vanRA|AAA65953.1	3.07e-45	149	target alteration	glycopeptide antibiotic
CP000142.2.region001	CP0001420012	ARO:3005008|Txr|AAK37618.1	2.33e-68	219	efflux pump	tetracycline antibiotic
CP000142.2.region001	CP0001420016	ARO:3002919|vanRA|AAA65953.1	6.31e-48	154	target alteration	glycopeptide antibiotic
CP000142.2.region001	CP0001420017	ARO:3003067|smeS|AAD51347.1	1.35e-100	306	efflux pump	aminoglycoside antibiotic;cephalosporin;cephamycin;penam
CP000157.1.region001	CP0001570014	ARO:3003801|bcr-1|ALV80601.1	1.81e-36	135	efflux pump	bicyclomycin
CP000159.1.region003	CP0001590014	BGC0000832|clorobiocin-resistant_gyrase_B|AAN65247.1	2.27e-140	415	target alteration	clorobiocin
CP000267.1.region001	CP0002670009	ARO:3003679|TriA|AAG03546.1	1.92e-53	179	efflux pump	triclosan
CP000267.1.region001	CP0002670010	ARO:3003010|ceoB|AAB58161.1	1.49e-38	153	efflux pump	aminoglycoside antibiotic;fluoroquinolone antibiotic
CP000356.1.region006	CP0003560020	ARO:3000620|adeL|ALH22601.1	5.81e-34	124	efflux pump	fluoroquinolone antibiotic;tetracycline antibiotic
CP000435.1.region003	CP0004350003	ARO:3002919|vanRA|AAA65953.1	3.18e-47	154	target alteration	glycopeptide antibiotic
CP000471.1.region002	CP0004710002	ARO:3005008|Txr|AAK37618.1	8.63e-70	221	efflux pump	tetracycline antibiotic
CP000471.1.region002	CP0004710004	ARO:3005008|Txr|AAK37618.1	1.75e-72	225	efflux pump	tetracycline antibiotic
CP000471.1.region002	CP0004710014	ARO:3005063|cprR|AAG06465.1	6.4e-35	120	efflux pump	peptide antibiotic
CP000551.1.region001	CP0005510003	ARO:3002919|vanRA|AAA65953.1	3.11e-45	149	target alteration	glycopeptide antibiotic
CP000552.1.region001	CP0005520003	ARO:3002919|vanRA|AAA65953.1	1.11e-44	147	target alteration	glycopeptide antibiotic
CP000553.1.region001	CP0005530003	ARO:3002919|vanRA|AAA65953.1	2.5e-48	156	target alteration	glycopeptide antibiotic
CP000554.1.region007	CP0005540002	ARO:3002919|vanRA|AAA65953.1	5.12e-47	153	target alteration	glycopeptide antibiotic
CP000576.1.region001	CP0005760003	ARO:3002919|vanRA|AAA65953.1	2.85e-45	149	target alteration	glycopeptide antibiotic
CP000667.1.region009	CP0006670021	ARO:3000343|tap|CAA03986.1	2.06e-33	126	efflux pump	tetracycline antibiotic
CP000667.1.region009	CP0006670031	ARO:3003748|oleC|AAA26793	1.82e-36	130	efflux pump	macrolide antibiotic
CP000667.1.region009	CP0006670042	ARO:3003967|lrfA|AAC43550.1	2.04e-59	201	efflux pump	fluoroquinolone antibiotic
CP000667.1.region018	CP0006670006	ARO:3000074|emrB|AAC75733.1	4.97e-48	171	efflux pump	fluoroquinolone antibiotic
CP000667.1.region018	CP0006670010	ARO:3003950|msbA|AAC74000.1	1.45e-45	167	efflux pump	nitroimidazole antibiotic
CP000667.1.region018	CP0006670015	macrolide_MefA-NCBIFAM|macrolide efflux MFS transporter Mef(A)	3.1e-36	120.5	efflux pump
CP000667.1.region018	CP0006670044	ARO:3003950|msbA|AAC74000.1	9e-67	224	efflux pump	nitroimidazole antibiotic
CP000667.1.region018	CP0006670045	ARO:3003950|msbA|AAC74000.1	4.89e-64	218	efflux pump	nitroimidazole antibiotic
CP000806.1.region004	CP0008060009	ARO:3000620|adeL|ALH22601.1	2.74e-52	171	efflux pump	fluoroquinolone antibiotic;tetracycline antibiotic
CP000825.1.region001	CP0008250003	ARO:3002919|vanRA|AAA65953.1	9.12e-45	147	target alteration	glycopeptide antibiotic
CP000828.1.region007	CP0008280008	ARO:3000833|evgS|AAC75429.1	9.51e-49	182	efflux pump	fluoroquinolone antibiotic;macrolide antibiotic;penam;tetracycline antibiotic
CP000828.1.region007	CP0008280009	ARO:3003952|yojI|AAC75271.1	1.8e-94	295	efflux pump	peptide antibiotic
CP000828.1.region009	CP0008280003	ARO:3000833|evgS|AAC75429.1	1.01e-44	167	efflux pump	fluoroquinolone antibiotic;macrolide antibiotic;penam;tetracycline antibiotic
CP000878.1.region001	CP0008780002	ARO:3002919|vanRA|AAA65953.1	1.08e-44	147	target alteration	glycopeptide antibiotic
CP001614.2.region007	CP0016140032	ARO:3000413|sul3|ACJ63260.1	1.23e-39	137	target replacement	sulfonamide antibiotic;sulfone antibiotic
CP001614.2.region007	CP0016140036	ARO:3003067|smeS|AAD51347.1	6.57e-84	263	efflux pump	aminoglycoside antibiotic;cephalosporin;cephamycin;penam
CP001614.2.region007	CP0016140037	ARO:3002919|vanRA|AAA65953.1	1.83e-43	143	target alteration	glycopeptide antibiotic
CP001614.2.region007	CP0016140041	BGC0001140|Resistance_gene|ACS13710.1	3.9e-35	127	target replacement	platensimycin/platencin
CP001614.2.region007	CP0016140058	BGC0001140|Resistance_gene|ACS13710.1	1.46e-60	195	target replacement	platensimycin/platencin
CP001712.1.region001	CP0017120019	ARO:3000378|MexB|AAA74437.1	2.82e-58	216	efflux pump	aminocoumarin antibiotic;carbapenem;cephalosporin;cephamycin;diaminopyrimidine antibiotic;fluoroquinolone antibiotic;macrolide antibiotic;monobactam;penam;penem;peptide antibiotic;phenicol antibiotic;sulfonamide antibiotic;tetracycline antibiotic
CP001712.1.region002	CP0017120017	ARO:3000535|macB|AAV85982.1	7.13e-43	150	efflux pump	macrolide antibiotic
CP001807.1.region002	CP0018070013	BGC0000832|clorobiocin-resistant_gyrase_B|AAN65247.1	8.53e-160	465	target alteration	clorobiocin
CP001807.1.region003	CP0018070020	BGC0001519|daunorubicin_resistance_protein_DrrA_family_ABC_transporter_ATP-binding_protein|WP_016638473.1	4.81e-31	110	efflux pump	aurantimycin A
CP001842.1.region001	CP0018420007	ARO:3005091|RanA|ADZ12699.1	3.59e-39	134	efflux pump	aminoglycoside antibiotic
CP002086.1.region002	CP0020860026	ARO:3000378|MexB|AAA74437.1	6.04e-59	217	efflux pump	aminocoumarin antibiotic;carbapenem;cephalosporin;cephamycin;diaminopyrimidine antibiotic;fluoroquinolone antibiotic;macrolide antibiotic;monobactam;penam;penem;peptide antibiotic;phenicol antibiotic;sulfonamide antibiotic;tetracycline antibiotic
CP002157.1.region001	CP0021570021	ARO:3002986|bacA|AAC76093.1	1.29e-40	138	target alteration	peptide antibiotic
CP002349.1.region002	CP0023490004	ARO:3003577|ugd|AAC75089.1	7.2e-43	152	target alteration	peptide antibiotic
CP002453.1.region001	CP0024530002	ARO:3000378|MexB|AAA74437.1	3.13e-61	225	efflux pump	aminocoumarin antibiotic;carbapenem;cephalosporin;cephamycin;diaminopyrimidine antibiotic;fluoroquinolone antibiotic;macrolide antibiotic;monobactam;penam;penem;peptide antibiotic;phenicol antibiotic;sulfonamide antibiotic;tetracycline antibiotic
CP002563.1.region002	CP0025630013	ARO:3000535|macB|AAV85982.1	3.45e-46	159	efflux pump	macrolide antibiotic
CP002638.1.region013	CP0026380036	ARO:3003748|oleC|AAA26793	3.14e-40	140	efflux pump	macrolide antibiotic
CP002638.1.region018	CP0026380019	ARO:3003950|msbA|AAC74000.1	6.81e-101	317	efflux pump	nitroimidazole antibiotic
CP002638.1.region019	CP0026380002	ARO:3003980|tetA(48)|APB03214.1	1.06e-38	134	efflux pump	tetracycline antibiotic
CP002638.1.region019	CP0026380005	ARO:3003950|msbA|AAC74000.1	3.66e-73	242	efflux pump	nitroimidazole antibiotic
CP002638.1.region019	CP0026380006	ARO:3003950|msbA|AAC74000.1	2.71e-63	216	efflux pump	nitroimidazole antibiotic
CP002663.1.region001	CP0026630011	ARO:3002970|vanTC|AAD22403.1	1.54e-32	125	target alteration	glycopeptide antibiotic
CP002663.1.region001	CP0026630018	BGC0000579|daunorubicin_resistance_protein_DrrA_family_ABC_transporter_ATP-binding_protein|WP_007385816.1	3.98e-32	116	efflux pump	SSV-2083
CP002831.1.region001	CP0028310029	ARO:3003578|pmrF|AAC75314.1	2.1e-43	149	target alteration	peptide antibiotic
CP002921.1.region003	CP0029210002	ARO:3002942|vanHA|AAA65955.1	3.85e-34	124	target alteration	glycopeptide antibiotic
CP002921.1.region003	CP0029210019	ARO:3003748|oleC|AAA26793	7.33e-41	140	efflux pump	macrolide antibiotic
CP002955.1.region002	CP0029550022	ARO:3002942|vanHA|AAA65955.1	1.78e-56	183	target alteration	glycopeptide antibiotic
CP002999.1.region001	CP0029990002	ARO:3000378|MexB|AAA74437.1	1.12e-60	223	efflux pump	aminocoumarin antibiotic;carbapenem;cephalosporin;cephamycin;diaminopyrimidine antibiotic;fluoroquinolone antibiotic;macrolide antibiotic;monobactam;penam;penem;peptide antibiotic;phenicol antibiotic;sulfonamide antibiotic;tetracycline antibiotic
CP003029.1.region002	CP0030290013	BGC0000832|clorobiocin-resistant_gyrase_B|AAN65247.1	2.49e-159	464	target alteration	clorobiocin
CP003051.1.region004	CP0030510001	ARO:3005008|Txr|AAK37618.1	2.46e-77	241	efflux pump	tetracycline antibiotic
CP003156.1.region004	CP0031560005	ARO:3000195|tetB(P)|AAA20117.1	1.08e-38	147	target protection	tetracycline antibiotic
CP003236.1.region006	CP0032360001	BGC0001140|Resistance_gene|ACS13710.1	1e-85	261	target replacement	platensimycin/platencin
CP003735.1.region005	CP0037350007	vanH_gen-NCBIFAM|D-lactate dehydrogenase VanH	3.1e-34	113.6	target alteration
CP003740.1.region003	CP0037400007	ARO:3004107|Pseudomonas|AAG05661.1	2.13e-48	150	efflux pump	acridine dye;cephalosporin;disinfecting agents and intercalating dyes;fluoroquinolone antibiotic;glycylcycline;penam;phenicol antibiotic;rifamycin antibiotic;tetracycline antibiotic;triclosan
CP003837.1.region002	CP0038370005	ARO:3003748|oleC|AAA26793	2.17e-34	123	efflux pump	macrolide antibiotic
CP003837.1.region002	CP0038370022	ARO:3000833|evgS|AAC75429.1	9.41e-57	208	efflux pump	fluoroquinolone antibiotic;macrolide antibiotic;penam;tetracycline antibiotic
CP003879.1.region004	CP0038790010	ARO:3000195|tetB(P)|AAA20117.1	2.56e-142	427	target protection	tetracycline antibiotic
CP003879.1.region004	CP0038790045	ARO:3000378|MexB|AAA74437.1	9.51e-50	188	efflux pump	aminocoumarin antibiotic;carbapenem;cephalosporin;cephamycin;diaminopyrimidine antibiotic;fluoroquinolone antibiotic;macrolide antibiotic;monobactam;penam;penem;peptide antibiotic;phenicol antibiotic;sulfonamide antibiotic;tetracycline antibiotic
CP005963.1.region002	CP0059630016	ARO:3002829|vgaA|AAA26684.1	1.08e-45	167	target protection	lincosamide antibiotic;macrolide antibiotic;oxazolidinone antibiotic;phenicol antibiotic;pleuromutilin antibiotic;streptogramin antibiotic;tetracycline antibiotic
CP005990.1.region002	CP0059900012	ARO:3003950|msbA|AAC74000.1	4.01e-99	310	efflux pump	nitroimidazole antibiotic
CP005990.1.region002	CP0059900018	ARO:3002829|vgaA|AAA26684.1	4.94e-47	170	target protection	lincosamide antibiotic;macrolide antibiotic;oxazolidinone antibiotic;phenicol antibiotic;pleuromutilin antibiotic;streptogramin antibiotic;tetracycline antibiotic
CP006269.1.region005	CP0062690003	ARO:3002919|vanRA|AAA65953.1	6.92e-47	153	target alteration	glycopeptide antibiotic
CP006270.1.region002	CP0062700003	ARO:3002919|vanRA|AAA65953.1	3.97e-46	151	target alteration	glycopeptide antibiotic
CP006271.1.region002	CP0062710020	ARO:3002919|vanRA|AAA65953.1	7.63e-47	152	target alteration	glycopeptide antibiotic
CP006643.1.region001	CP0066430002	ARO:3003748|oleC|AAA26793	6.47e-45	152	efflux pump	macrolide antibiotic
CP006643.1.region001	CP0066430010	CHL_hydrolase-NCBIFAM|chloramphenicol hydrolase	4e-39	129.6	product inactivation
CP006643.1.region002	CP0066430023	ARO:3002829|vgaA|AAA26684.1	3.55e-62	212	target protection	lincosamide antibiotic;macrolide antibiotic;oxazolidinone antibiotic;phenicol antibiotic;pleuromutilin antibiotic;streptogramin antibiotic;tetracycline antibiotic
CP006643.1.region003	CP0066430001	ARO:3003748|oleC|AAA26793	1.51e-56	182	efflux pump	macrolide antibiotic
CP006643.1.region003	CP0066430010	ARO:3001327|mdtK|AML99881.1	9.19e-33	126	efflux pump	fluoroquinolone antibiotic
CP006882.1.region002	CP0068820003	ARO:3002919|vanRA|AAA65953.1	5.58e-47	153	target alteration	glycopeptide antibiotic
CP006939.1.region003	CP0069390018	ARO:3000833|evgS|AAC75429.1	1.7e-40	158	efflux pump	fluoroquinolone antibiotic;macrolide antibiotic;penam;tetracycline antibiotic
CP007656.1.region003	CP0076560014	ARO:3003748|oleC|AAA26793	3.69e-41	142	efflux pump	macrolide antibiotic
CP007753.1.region001	CP0077530003	ARO:3002919|vanRA|AAA65953.1	1.23e-40	135	target alteration	glycopeptide antibiotic
CP007754.1.region001	CP0077540003	ARO:3002919|vanRA|AAA65953.1	2.42e-48	156	target alteration	glycopeptide antibiotic
CP007790.1.region001	CP0077900016	ARO:3003748|oleC|AAA26793	2.05e-31	117	efflux pump	macrolide antibiotic
CP009291.1.region005	CP0092910010	ARO:3003801|bcr-1|ALV80601.1	6.76e-37	136	efflux pump	bicyclomycin
CP009291.1.region005	CP0092910016	resist_ArsN1b-NCBIFAM|arsinothricin resistance N-acetyltransferase ArsN1 family B	7.3e-42	138.1	product inactivation
CP009416.1.region001	CP0094160010	ARO:3001327|mdtK|AML99881.1	3.63e-40	147	efflux pump	fluoroquinolone antibiotic
CP009887.1.region002	CP0098870002	ARO:3000378|MexB|AAA74437.1	1.99e-63	232	efflux pump	aminocoumarin antibiotic;carbapenem;cephalosporin;cephamycin;diaminopyrimidine antibiotic;fluoroquinolone antibiotic;macrolide antibiotic;monobactam;penam;penem;peptide antibiotic;phenicol antibiotic;sulfonamide antibiotic;tetracycline antibiotic
CP009976.1.region001	CP0099760002	ARO:3000378|MexB|AAA74437.1	1.58e-63	232	efflux pump	aminocoumarin antibiotic;carbapenem;cephalosporin;cephamycin;diaminopyrimidine antibiotic;fluoroquinolone antibiotic;macrolide antibiotic;monobactam;penam;penem;peptide antibiotic;phenicol antibiotic;sulfonamide antibiotic;tetracycline antibiotic
CP010529.1.region003	CP0105290003	ARO:3002942|vanHA|AAA65955.1	3.5e-34	124	target alteration	glycopeptide antibiotic
CP010529.1.region003	CP0105290018	ARO:3003748|oleC|AAA26793	7.33e-41	140	efflux pump	macrolide antibiotic
CP010535.1.region003	CP0105350017	ARO:3003010|ceoB|AAB58161.1	3.09e-52	197	efflux pump	aminoglycoside antibiotic;fluoroquinolone antibiotic
CP010797.1.region007	CP0107970006	ARO:3002829|vgaA|AAA26684.1	8.76e-32	125	target protection	lincosamide antibiotic;macrolide antibiotic;oxazolidinone antibiotic;phenicol antibiotic;pleuromutilin antibiotic;streptogramin antibiotic;tetracycline antibiotic
CP010869.1.region004	CP0108690003	ARO:3002829|vgaA|AAA26684.1	7.77e-44	161	target protection	lincosamide antibiotic;macrolide antibiotic;oxazolidinone antibiotic;phenicol antibiotic;pleuromutilin antibiotic;streptogramin antibiotic;tetracycline antibiotic
CP011001.1.region002	CP0110010008	ARO:3002972|vanTG|ABA71733.1	1.86e-50	176	target alteration	glycopeptide antibiotic
CP011002.1.region002	CP0110020017	ARO:3002972|vanTG|ABA71733.1	1.86e-50	176	target alteration	glycopeptide antibiotic
CP011003.1.region002	CP0110030017	ARO:3002972|vanTG|ABA71733.1	1.86e-50	176	target alteration	glycopeptide antibiotic
CP011071.1.region001	CP0110710001	ARO:3000378|MexB|AAA74437.1	3.1e-58	216	efflux pump	aminocoumarin antibiotic;carbapenem;cephalosporin;cephamycin;diaminopyrimidine antibiotic;fluoroquinolone antibiotic;macrolide antibiotic;monobactam;penam;penem;peptide antibiotic;phenicol antibiotic;sulfonamide antibiotic;tetracycline antibiotic
CP011071.1.region002	CP0110710015	ARO:3000535|macB|AAV85982.1	2.97e-46	159	efflux pump	macrolide antibiotic
CP011071.1.region002	CP0110710021	HK_VanS_ACDEFG-NCBIFAM|vancomycin resistance histidine kinase VanS	5.8e-33	109.4	target protection
CP011310.1.region004	CP0113100017	cmlA_floR-NCBIFAM|CmlA/FloR family chloramphenicol efflux MFS transporter	6.9e-41	136.2	efflux pump
CP011344.1.region002	CP0113440008	ARO:3003801|bcr-1|ALV80601.1	3.22e-37	137	efflux pump	bicyclomycin
CP011452.2.region002	CP0114520008	ARO:3003801|bcr-1|ALV80601.1	4.11e-35	131	efflux pump	bicyclomycin
CP011492.1.region001	CP0114920021	ARO:3002884|iri|AAB41059.1	3.97e-65	215	product inactivation	rifamycin antibiotic
CP011492.1.region010	CP0114920008	ARO:3003047|qacB|AAQ10694.1	8.78e-49	172	efflux pump	fluoroquinolone antibiotic
CP011492.1.region013	CP0114920018	ARO:3003967|lrfA|AAC43550.1	7.49e-33	128	efflux pump	fluoroquinolone antibiotic
CP011492.1.region018	CP0114920001	rif_monoox-NCBIFAM|rifampin monooxygenase	7.2e-41	135.7	product inactivation
CP011492.1.region018	CP0114920002	ARO:3003967|lrfA|AAC43550.1	1.34e-31	124	efflux pump	fluoroquinolone antibiotic
CP011492.1.region018	CP0114920011	ARO:3003967|lrfA|AAC43550.1	3.62e-35	135	efflux pump	fluoroquinolone antibiotic
CP011492.1.region018	CP0114920032	rif_monoox-NCBIFAM|rifampin monooxygenase	1.6e-47	157.7	product inactivation
CP011492.1.region018	CP0114920044	resist_ArsN1b-NCBIFAM|arsinothricin resistance N-acetyltransferase ArsN1 family B	1.2e-41	137.4	product inactivation
CP011494.1.region005	CP0114940007	vanH_gen-NCBIFAM|D-lactate dehydrogenase VanH	2e-34	114.3	target alteration
CP011805.1.region001	CP0118050009	ARO:3003801|bcr-1|ALV80601.1	2.45e-32	123	efflux pump	bicyclomycin
CP011941.1.region003	CP0119410003	ARO:3002919|vanRA|AAA65953.1	4.65e-47	153	target alteration	glycopeptide antibiotic
CP012040.1.region002	CP0120400021	ARO:3002942|vanHA|AAA65955.1	1.49e-60	194	target alteration	glycopeptide antibiotic
CP012154.1.region002	CP0121540002	vanH_gen-NCBIFAM|D-lactate dehydrogenase VanH	2e-33	111	target alteration
CP012669.1.region002	CP0126690006	cmlA_floR-NCBIFAM|CmlA/FloR family chloramphenicol efflux MFS transporter	2.9e-32	107.7	efflux pump
CP012749.1.region013	CP0127490009	ARO:3003748|oleC|AAA26793	4.83e-51	169	efflux pump	macrolide antibiotic
CP012749.1.region013	CP0127490023	ARO:3002829|vgaA|AAA26684.1	4.04e-33	129	target protection	lincosamide antibiotic;macrolide antibiotic;oxazolidinone antibiotic;phenicol antibiotic;pleuromutilin antibiotic;streptogramin antibiotic;tetracycline antibiotic
CP012898.1.region001	CP0128980015	ARO:3002942|vanHA|AAA65955.1	2.64e-36	130	target alteration	glycopeptide antibiotic
CP013661.2.region001	CP0136610001	ARO:3003006|blt|AAC36944.1	5.08e-39	141	efflux pump	acridine dye;disinfecting agents and intercalating dyes;fluoroquinolone antibiotic
CP013661.2.region001	CP0136610009	vanXY-NCBIFAM|D,D-carboxypeptidase/D,D-dipeptidase VanXY D-carboxypeptidase/D	1.8e-33	110.8	target alteration
CP013661.2.region002	CP0136610016	ARO:3005091|RanA|ADZ12699.1	1.18e-34	122	efflux pump	aminoglycoside antibiotic
CP014545.1.region003	CP0145450003	CHL_hydrolase-NCBIFAM|chloramphenicol hydrolase	7.2e-73	240.4	product inactivation
CP014796.1.region004	CP0147960003	BGC0001140|Resistance_gene|ACS13710.1	1.41e-80	247	target replacement	platensimycin/platencin
CP014796.1.region004	CP0147960014	47473_otr-NCBIFAM|tetracycline resistance ribosomal protection protein Otr(A)	3e-34	113.8	target protection
CP014796.1.region004	CP0147960015	ARO:3004038|Pseudomonas|AAG08375.1	4.7e-32	106	efflux pump	aminoglycoside antibiotic
CP014859.1.region010	CP0148590019	ARO:3002827|tlrC|AAA26832.1	4.38e-53	186	target protection	lincosamide antibiotic;macrolide antibiotic;oxazolidinone antibiotic;phenicol antibiotic;pleuromutilin antibiotic;streptogramin antibiotic;tetracycline antibiotic
CP014859.1.region014	CP0148590022	ARO:3003748|oleC|AAA26793	1.15e-61	196	efflux pump	macrolide antibiotic
CP014989.1.region001	CP0149890004	ARO:3003748|oleC|AAA26793	2.28e-55	180	efflux pump	macrolide antibiotic
CP015163.1.region007	CP0151630013	ARO:3002827|tlrC|AAA26832.1	3.63e-55	191	target protection	lincosamide antibiotic;macrolide antibiotic;oxazolidinone antibiotic;phenicol antibiotic;pleuromutilin antibiotic;streptogramin antibiotic;tetracycline antibiotic
CP015163.1.region010	CP0151630015	ARO:3004613|Tet(47)|AKQ05891.1	4.28e-78	244	product inactivation	tetracycline antibiotic
CP015163.1.region027	CP0151630005	ARO:3002700|cmlv|AAB36568.1	4.69e-88	270	product inactivation	phenicol antibiotic
CP015163.1.region027	CP0151630012	ARO:3000074|emrB|AAC75733.1	5.24e-53	184	efflux pump	fluoroquinolone antibiotic
CP015163.1.region027	CP0151630015	ARO:3003950|msbA|AAC74000.1	3.79e-92	293	efflux pump	nitroimidazole antibiotic
CP015163.1.region027	CP0151630016	ARO:3003950|msbA|AAC74000.1	3.74e-55	192	efflux pump	nitroimidazole antibiotic
CP015163.1.region027	CP0151630026	rif_monoox-NCBIFAM|rifampin monooxygenase	6.7e-38	125.9	product inactivation
CP015163.1.region027	CP0151630048	ARO:3003981|tetB(48)|APB03215.1	8.53e-55	175	efflux pump	tetracycline antibiotic
CP015163.1.region027	CP0151630049	ARO:3003748|oleC|AAA26793	1.37e-92	276	efflux pump	macrolide antibiotic
CP015163.1.region027	CP0151630069	ARO:3004577|Acinetobacter|ACQ82816.1	4.13e-33	128	efflux pump	acridine dye;disinfecting agents and intercalating dyes;macrolide antibiotic
CP015518.1.region002	CP0155180012	ARO:3005008|Txr|AAK37618.1	2.38e-66	213	efflux pump	tetracycline antibiotic
CP015518.1.region002	CP0155180016	ARO:3002919|vanRA|AAA65953.1	1.62e-48	156	target alteration	glycopeptide antibiotic
CP015518.1.region002	CP0155180017	ARO:3003067|smeS|AAD51347.1	3.14e-99	303	efflux pump	aminoglycoside antibiotic;cephalosporin;cephamycin;penam
CP015839.1.region009	CP0158390014	ARO:3005008|Txr|AAK37618.1	4.16e-66	212	efflux pump	tetracycline antibiotic
CP015963.1.region001	CP0159630015	ARO:3003801|bcr-1|ALV80601.1	3.51e-42	150	efflux pump	bicyclomycin
CP016020.1.region003	CP0160200017	ARO:3003748|oleC|AAA26793	8.11e-58	186	efflux pump	macrolide antibiotic
CP016076.1.region008	CP0160760019	ARO:3004451|Agrobacterium|AAA22081.1	3.32e-41	137	product inactivation	phenicol antibiotic
CP016076.1.region011	CP0160760014	CHL_hydrolase-NCBIFAM|chloramphenicol hydrolase	1.9e-59	196.3	product inactivation
CP016077.1.region008	CP0160770020	ARO:3004451|Agrobacterium|AAA22081.1	3.32e-41	137	product inactivation	phenicol antibiotic
CP016077.1.region011	CP0160770014	CHL_hydrolase-NCBIFAM|chloramphenicol hydrolase	2.7e-59	195.8	product inactivation
CP016269.1.region003	CP0162690014	ARO:3002942|vanHA|AAA65955.1	6.33e-63	200	target alteration	glycopeptide antibiotic
CP016353.1.region009	CP0163530002	ARO:3003950|msbA|AAC74000.1	1.57e-93	296	efflux pump	nitroimidazole antibiotic
CP016353.1.region009	CP0163530005	ARO:3002827|tlrC|AAA26832.1	3.63e-54	189	target protection	lincosamide antibiotic;macrolide antibiotic;oxazolidinone antibiotic;phenicol antibiotic;pleuromutilin antibiotic;streptogramin antibiotic;tetracycline antibiotic
CP016538.2.region001	CP0165380008	ARO:3002956|vanYB|AAB05624.1	1.6e-32	118	target alteration	glycopeptide antibiotic
CP016538.2.region001	CP0165380019	ARO:3003006|blt|AAC36944.1	1.32e-37	137	efflux pump	acridine dye;disinfecting agents and intercalating dyes;fluoroquinolone antibiotic
CP016538.2.region002	CP0165380004	ARO:3005091|RanA|ADZ12699.1	7.5e-34	119	efflux pump	aminoglycoside antibiotic
CP016539.2.region001	CP0165390008	ARO:3002956|vanYB|AAB05624.1	7.35e-32	115	target alteration	glycopeptide antibiotic
CP016539.2.region002	CP0165390004	ARO:3005091|RanA|ADZ12699.1	2.17e-33	118	efflux pump	aminoglycoside antibiotic
CP016543.2.region001	CP0165430009	vanXY-NCBIFAM|D,D-carboxypeptidase/D,D-dipeptidase VanXY D-carboxypeptidase/D	7.3e-35	115.4	target alteration
CP016543.2.region001	CP0165430018	ARO:3003006|blt|AAC36944.1	3.57e-36	133	efflux pump	acridine dye;disinfecting agents and intercalating dyes;fluoroquinolone antibiotic
CP016543.2.region002	CP0165430003	ARO:3005091|RanA|ADZ12699.1	3.85e-34	120	efflux pump	aminoglycoside antibiotic
CP016545.1.region002	CP0165450007	ARO:3003801|bcr-1|ALV80601.1	2.61e-37	137	efflux pump	bicyclomycin
CP016545.1.region002	CP0165450022	BGC0001655|daunorubicin_resistance_protein_DrrA_family_ABC_transporter_ATP-binding_protein|WP_017534155.1	2.62e-31	109	efflux pump	LP2006
CP016591.1.region004	CP0165910005	ARO:3000833|evgS|AAC75429.1	9.78e-46	169	efflux pump	fluoroquinolone antibiotic;macrolide antibiotic;penam;tetracycline antibiotic
CP016591.1.region004	CP0165910014	ARO:3003801|bcr-1|ALV80601.1	6.17e-41	147	efflux pump	bicyclomycin
CP016591.1.region004	CP0165910015	ARO:3004573|Acinetobacter|ABO11759.2	1.36e-57	195	efflux pump	fosfomycin
CP017057.1.region002	CP0170570006	ARO:3003801|bcr-1|ALV80601.1	3.9e-36	134	efflux pump	bicyclomycin
CP017476.1.region005	CP0174760004	ARO:3000378|MexB|AAA74437.1	1.68e-53	200	efflux pump	aminocoumarin antibiotic;carbapenem;cephalosporin;cephamycin;diaminopyrimidine antibiotic;fluoroquinolone antibiotic;macrolide antibiotic;monobactam;penam;penem;peptide antibiotic;phenicol antibiotic;sulfonamide antibiotic;tetracycline antibiotic
CP017476.1.region005	CP0174760005	ARO:3003679|TriA|AAG03546.1	8.41e-45	155	efflux pump	triclosan
CP017476.1.region005	CP0174760013	ARO:3005091|RanA|ADZ12699.1	8.76e-34	123	efflux pump	aminoglycoside antibiotic
CP017599.1.region022	CP0175990005	ARO:3000195|tetB(P)|AAA20117.1	2.52e-41	155	target protection	tetracycline antibiotic
CP017599.1.region025	CP0175990001	BGC0001140|Resistance_gene|ACS13710.1	1.85e-95	286	target replacement	platensimycin/platencin
CP017708.1.region027	CP0177080005	ARO:3000195|tetB(P)|AAA20117.1	6.45e-41	154	target protection	tetracycline antibiotic
CP017839.1.region013	CP0178390010	ARO:3002919|vanRA|AAA65953.1	1.55e-37	129	target alteration	glycopeptide antibiotic
CP017839.1.region023	CP0178390004	ARO:3000074|emrB|AAC75733.1	1.88e-31	123	efflux pump	fluoroquinolone antibiotic
CP017839.1.region027	CP0178390019	ARO:3003748|oleC|AAA26793	4.2e-95	283	efflux pump	macrolide antibiotic
CP017965.1.region010	CP0179650016	ARO:3000535|macB|AAV85982.1	2.31e-39	140	efflux pump	macrolide antibiotic
CP018047.1.region004	CP0180470031	BGC0001140|Resistance_gene|ACS13710.1	5.28e-31	120	target replacement	platensimycin/platencin
CP018047.1.region004	CP0180470035	ARO:3003950|msbA|AAC74000.1	6.91e-72	238	efflux pump	nitroimidazole antibiotic
CP018097.1.region002	CP0180970007	ARO:3003801|bcr-1|ALV80601.1	4.77e-36	134	efflux pump	bicyclomycin
CP018197.1.region005	CP0181970013	ARO:3001327|mdtK|AML99881.1	6.33e-37	138	efflux pump	fluoroquinolone antibiotic
CP019117.1.region006	CP0191170004	resist_ArsN1b-NCBIFAM|arsinothricin resistance N-acetyltransferase ArsN1 family B	2.4e-36	120.2	product inactivation
CP019117.1.region006	CP0191170039	ARO:3002942|vanHA|AAA65955.1	4.74e-47	159	target alteration	glycopeptide antibiotic
CP019606.1.region001	CP0196060003	ARO:3000535|macB|AAV85982.1	9.91e-59	194	efflux pump	macrolide antibiotic
CP019607.1.region001	CP0196070002	APH_3p-NCBIFAM|APH(3') family aminoglycoside O-phosphotransferase	3.6e-36	120.2	product inactivation
CP019607.1.region001	CP0196070013	ARO:3003907|cipA|ACX65640.1	2.69e-67	213	target alteration	lincosamide antibiotic;oxazolidinone antibiotic;phenicol antibiotic;pleuromutilin antibiotic;streptogramin antibiotic
CP021112.1.region008	CP0211120004	ARO:3000620|adeL|ALH22601.1	1.67e-49	164	efflux pump	fluoroquinolone antibiotic;tetracycline antibiotic
CP021121.1.region024	CP0211210006	ARO:3002914|vanJ|CAB45459.1	3.55e-113	329	target alteration	glycopeptide antibiotic
CP021707.1.region028	CP0217070001	ARO:3004451|Agrobacterium|AAA22081.1	7.04e-41	135	product inactivation	phenicol antibiotic
CP021912.1.region002	CP0219120015	ARO:3003801|bcr-1|ALV80601.1	2.77e-31	120	efflux pump	bicyclomycin
CP022528.1.region001	CP0225280016	ARO:3003801|bcr-1|ALV80601.1	5.76e-37	136	efflux pump	bicyclomycin
CP022957.1.region003	CP0229570019	ARO:3000378|MexB|AAA74437.1	9.82e-53	198	efflux pump	aminocoumarin antibiotic;carbapenem;cephalosporin;cephamycin;diaminopyrimidine antibiotic;fluoroquinolone antibiotic;macrolide antibiotic;monobactam;penam;penem;peptide antibiotic;phenicol antibiotic;sulfonamide antibiotic;tetracycline antibiotic
CP023720.1.region010	CP0237200013	ARO:3002829|vgaA|AAA26684.1	3.78e-33	129	target protection	lincosamide antibiotic;macrolide antibiotic;oxazolidinone antibiotic;phenicol antibiotic;pleuromutilin antibiotic;streptogramin antibiotic;tetracycline antibiotic
CP023720.1.region010	CP0237200027	ARO:3003748|oleC|AAA26793	4.83e-51	169	efflux pump	macrolide antibiotic
CP024052.1.region010	CP0240520023	ARO:3000535|macB|AAV85982.1	6.41e-59	194	efflux pump	macrolide antibiotic
CP024052.1.region012	CP0240520013	ARO:3003950|msbA|AAC74000.1	7.24e-70	234	efflux pump	nitroimidazole antibiotic
CP024052.1.region012	CP0240520014	ARO:3003950|msbA|AAC74000.1	5.14e-78	255	efflux pump	nitroimidazole antibiotic
CP024052.1.region012	CP0240520017	ARO:3003980|tetA(48)|APB03214.1	1.9e-33	120	efflux pump	tetracycline antibiotic
CP024052.1.region013	CP0240520001	ARO:3003748|oleC|AAA26793	3.6e-75	229	efflux pump	macrolide antibiotic
CP024052.1.region013	CP0240520002	ARO:3003981|tetB(48)|APB03215.1	9.81e-37	128	efflux pump	tetracycline antibiotic
CP024087.1.region001	CP0240870002	ARO:3000815|mgrA|BAB41874.1	7.27e-34	113	efflux pump	acridine dye;cephalosporin;disinfecting agents and intercalating dyes;fluoroquinolone antibiotic;penam;peptide antibiotic;tetracycline antibiotic
CP024087.1.region001	CP0240870013	ARO:3003950|msbA|AAC74000.1	1.64e-71	238	efflux pump	nitroimidazole antibiotic
CP024087.1.region001	CP0240870014	ARO:3003950|msbA|AAC74000.1	7.49e-81	263	efflux pump	nitroimidazole antibiotic
CP024087.1.region001	CP0240870019	ARO:3003748|oleC|AAA26793	3.44e-31	114	efflux pump	macrolide antibiotic
CP024087.1.region002	CP0240870002	ARO:3003950|msbA|AAC74000.1	4.56e-104	325	efflux pump	nitroimidazole antibiotic
CP024199.1.region001	CP0241990005	ARO:3002987|bcrA|AAA99504.1	1.81e-43	148	efflux pump	peptide antibiotic
CP024315.1.region003	CP0243150013	ARO:3002829|vgaA|AAA26684.1	9.67e-33	128	target protection	lincosamide antibiotic;macrolide antibiotic;oxazolidinone antibiotic;phenicol antibiotic;pleuromutilin antibiotic;streptogramin antibiotic;tetracycline antibiotic
CP024794.1.region005	CP0247940020	ARO:3002919|vanRA|AAA65953.1	6.24e-72	216	target alteration	glycopeptide antibiotic
CP024794.1.region006	CP0247940008	ARO:3000535|macB|AAV85982.1	9.8e-57	189	efflux pump	macrolide antibiotic
CP024794.1.region006	CP0247940011	ARO:3002919|vanRA|AAA65953.1	2.72e-38	130	target alteration	glycopeptide antibiotic
CP024920.1.region004	CP0249200008	ARO:3003801|bcr-1|ALV80601.1	4.59e-37	137	efflux pump	bicyclomycin
CP025119.1.region003	CP0251190004	ARO:3002986|bacA|AAC76093.1	1.12e-41	141	target alteration	peptide antibiotic
CP025119.1.region003	CP0251190018	ARO:3000378|MexB|AAA74437.1	4.13e-63	231	efflux pump	aminocoumarin antibiotic;carbapenem;cephalosporin;cephamycin;diaminopyrimidine antibiotic;fluoroquinolone antibiotic;macrolide antibiotic;monobactam;penam;penem;peptide antibiotic;phenicol antibiotic;sulfonamide antibiotic;tetracycline antibiotic
CP025407.1.region012	CP0254070018	resist_ArsN1b-NCBIFAM|arsinothricin resistance N-acetyltransferase ArsN1 family B	1.5e-43	143.6	product inactivation
CP025407.1.region012	CP0254070051	ARO:3003967|lrfA|AAC43550.1	7.34e-36	136	efflux pump	fluoroquinolone antibiotic
CP025407.1.region012	CP0254070060	ARO:3003967|lrfA|AAC43550.1	4.16e-32	125	efflux pump	fluoroquinolone antibiotic
CP025407.1.region012	CP0254070061	rif_monoox-NCBIFAM|rifampin monooxygenase	1.1e-40	135.1	product inactivation
CP025407.1.region016	CP0254070010	ARO:3003967|lrfA|AAC43550.1	2.26e-32	126	efflux pump	fluoroquinolone antibiotic
CP025407.1.region018	CP0254070004	ARO:3003748|oleC|AAA26793	3.56e-118	341	efflux pump	macrolide antibiotic
CP025407.1.region018	CP0254070005	ARO:3003981|tetB(48)|APB03215.1	6.48e-75	227	efflux pump	tetracycline antibiotic
CP025407.1.region018	CP0254070010	ARO:3003047|qacB|AAQ10694.1	2.69e-47	169	efflux pump	fluoroquinolone antibiotic
CP025407.1.region023	CP0254070005	ARO:3003785|Chlamydia|AAN28945	1.29e-36	137	target alteration	fosfomycin
CP025407.1.region023	CP0254070007	ribo_prot_ABC_F-NCBIFAM|ABC-F type ribosomal protection protein	1e-40	135.2	target protection
CP025407.1.region023	CP0254070019	ARO:3003967|lrfA|AAC43550.1	1.34e-33	130	efflux pump	fluoroquinolone antibiotic
CP025407.1.region028	CP0254070043	ARO:3002884|iri|AAB41059.1	6.67e-66	218	product inactivation	rifamycin antibiotic
CP025990.1.region015	CP0259900004	ARO:3003950|msbA|AAC74000.1	6.61e-66	222	efflux pump	nitroimidazole antibiotic
CP025990.1.region015	CP0259900005	ARO:3003950|msbA|AAC74000.1	5.85e-61	209	efflux pump	nitroimidazole antibiotic
CP025990.1.region015	CP0259900009	ribo_prot_ABC_F-NCBIFAM|ABC-F type ribosomal protection protein	3.7e-32	107	target protection
CP025990.1.region017	CP0259900009	ARO:3003950|msbA|AAC74000.1	9.02e-70	233	efflux pump	nitroimidazole antibiotic
CP025990.1.region017	CP0259900014	ARO:3002827|tlrC|AAA26832.1	9.03e-51	179	target protection	lincosamide antibiotic;macrolide antibiotic;oxazolidinone antibiotic;phenicol antibiotic;pleuromutilin antibiotic;streptogramin antibiotic;tetracycline antibiotic
CP025990.1.region023	CP0259900004	ARO:3003980|tetA(48)|APB03214.1	8.35e-33	121	efflux pump	tetracycline antibiotic
CP026366.1.region003	CP0263660005	ARO:3003907|cipA|ACX65640.1	1.94e-57	190	target alteration	lincosamide antibiotic;oxazolidinone antibiotic;phenicol antibiotic;pleuromutilin antibiotic;streptogramin antibiotic
CP026367.1.region002	CP0263670036	ARO:3002942|vanHA|AAA65955.1	1.27e-47	160	target alteration	glycopeptide antibiotic
CP026923.1.region001	CP0269230016	ARO:3000444|rphA|AIA08936.1	6.51e-44	167	product inactivation	rifamycin antibiotic
CP028158.1.region005	CP0281580018	glycotrans_Rgt-NCBIFAM|rifamycin-inactivating glycosyltransferase Rgt	1.7e-31	104.9	product inactivation
CP028158.1.region019	CP0281580002	ARO:3003748|oleC|AAA26793	1.22e-35	126	efflux pump	macrolide antibiotic
CP028158.1.region019	CP0281580006	ARO:3003950|msbA|AAC74000.1	2.08e-73	243	efflux pump	nitroimidazole antibiotic
CP028158.1.region019	CP0281580007	ARO:3003950|msbA|AAC74000.1	1.12e-64	221	efflux pump	nitroimidazole antibiotic
CP028158.1.region019	CP0281580014	ARO:3002919|vanRA|AAA65953.1	6.68e-39	132	target alteration	glycopeptide antibiotic
CP028159.1.region003	CP0281590018	glycotrans_Rgt-NCBIFAM|rifamycin-inactivating glycosyltransferase Rgt	2.5e-31	104.4	product inactivation
CP028159.1.region017	CP0281590002	ARO:3003748|oleC|AAA26793	1.22e-35	126	efflux pump	macrolide antibiotic
CP028159.1.region017	CP0281590006	ARO:3003950|msbA|AAC74000.1	1.26e-73	243	efflux pump	nitroimidazole antibiotic
CP028159.1.region017	CP0281590007	ARO:3003950|msbA|AAC74000.1	2.67e-64	220	efflux pump	nitroimidazole antibiotic
CP028159.1.region017	CP0281590013	ARO:3002919|vanRA|AAA65953.1	5.75e-39	132	target alteration	glycopeptide antibiotic
CP028901.1.region001	CP0289010011	vanT-CELN-NCBIFAM|membrane-bound serine racemase VanT	1.4e-34	114.8	target alteration
CP028901.1.region001	CP0289010017	BGC0000579|daunorubicin_resistance_protein_DrrA_family_ABC_transporter_ATP-binding_protein|WP_007385816.1	2.67e-32	117	efflux pump	SSV-2083
CP028960.1.region005	CP0289600021	ARO:3000378|MexB|AAA74437.1	1.17e-53	201	efflux pump	aminocoumarin antibiotic;carbapenem;cephalosporin;cephamycin;diaminopyrimidine antibiotic;fluoroquinolone antibiotic;macrolide antibiotic;monobactam;penam;penem;peptide antibiotic;phenicol antibiotic;sulfonamide antibiotic;tetracycline antibiotic
CP029043.1.region001	CP0290430006	ARO:3004573|Acinetobacter|ABO11759.2	5.55e-140	405	efflux pump	fosfomycin
CP029043.1.region003	CP0290430006	ARO:3005091|RanA|ADZ12699.1	1.76e-36	130	efflux pump	aminoglycoside antibiotic
CP029241.1.region003	CP0292410001	ARO:3004611|Escherichia|CBJ02047.1	6.91e-50	171	product inactivation	cephalosporin;penam
CP029241.1.region009	CP0292410022	BGC0001658|Daunorubicin/doxorubicin_resistance_ABC_transporter_permease_protein_DrrB|OAP25823.1	3.95e-48	154	efflux pump	macrotermycins
CP029241.1.region009	CP0292410023	ARO:3003748|oleC|AAA26793	9.6e-90	270	efflux pump	macrolide antibiotic
CP029241.1.region021	CP0292410013	BGC0000300|major_facilitator_superfamily_transporter_multidrug_resistance_protein|EFL06870.1	2.86e-44	153	efflux pump	amychelin
CP029254.1.region020	CP0292540010	ARO:3003967|lrfA|AAC43550.1	1.6e-40	150	efflux pump	fluoroquinolone antibiotic
CP029463.1.region001	CP0294630008	ARO:3003748|oleC|AAA26793	8.62e-31	114	efflux pump	macrolide antibiotic
CP029495.1.region009	CP0294950014	ARO:3000535|macB|AAV85982.1	4.68e-33	123	efflux pump	macrolide antibiotic
CP029554.1.region003	CP0295540014	ARO:3000535|macB|AAV85982.1	4.12e-33	124	efflux pump	macrolide antibiotic
CP030064.1.region003	CP0300640012	ARO:3005091|RanA|ADZ12699.1	1.59e-38	133	efflux pump	aminoglycoside antibiotic
CP030092.1.region003	CP0300920011	ARO:3003679|TriA|AAG03546.1	2.66e-48	164	efflux pump	triclosan
CP030092.1.region003	CP0300920012	ARO:3000378|MexB|AAA74437.1	1.1e-54	204	efflux pump	aminocoumarin antibiotic;carbapenem;cephalosporin;cephamycin;diaminopyrimidine antibiotic;fluoroquinolone antibiotic;macrolide antibiotic;monobactam;penam;penem;peptide antibiotic;phenicol antibiotic;sulfonamide antibiotic;tetracycline antibiotic
CP030092.1.region011	CP0300920016	HK_VanS_ACDEFG-NCBIFAM|vancomycin resistance histidine kinase VanS	1.5e-33	111.4	target protection
CP030104.1.region002	CP0301040002	ARO:3000378|MexB|AAA74437.1	2.06e-55	207	efflux pump	aminocoumarin antibiotic;carbapenem;cephalosporin;cephamycin;diaminopyrimidine antibiotic;fluoroquinolone antibiotic;macrolide antibiotic;monobactam;penam;penem;peptide antibiotic;phenicol antibiotic;sulfonamide antibiotic;tetracycline antibiotic
CP030158.1.region003	CP0301580017	ARO:3002942|vanHA|AAA65955.1	3.29e-40	140	target alteration	glycopeptide antibiotic
CP030158.1.region004	CP0301580001	BGC0000832|clorobiocin-resistant_gyrase_B|AAN65247.1	7.03e-163	473	target alteration	clorobiocin
CP030356.1.region005	CP0303560014	BGC0000832|clorobiocin-resistant_gyrase_B|AAN65247.1	6.94e-141	416	target alteration	clorobiocin
CP030357.1.region004	CP0303570014	BGC0000832|clorobiocin-resistant_gyrase_B|AAN65247.1	3.85e-140	414	target alteration	clorobiocin
CP030361.1.region003	CP0303610014	BGC0000832|clorobiocin-resistant_gyrase_B|AAN65247.1	2.79e-140	414	target alteration	clorobiocin
CP030364.1.region004	CP0303640014	BGC0000832|clorobiocin-resistant_gyrase_B|AAN65247.1	3.85e-140	414	target alteration	clorobiocin
CP030369.1.region005	CP0303690014	BGC0000832|clorobiocin-resistant_gyrase_B|AAN65247.1	2.32e-140	415	target alteration	clorobiocin
CP030716.1.region003	CP0307160014	BGC0000832|clorobiocin-resistant_gyrase_B|AAN65247.1	2.04e-140	415	target alteration	clorobiocin
CP031155.1.region003	CP0311550005	ARO:3003801|bcr-1|ALV80601.1	1.09e-40	146	efflux pump	bicyclomycin
CP031188.1.region002	CP0311880003	tet_protect-NCBIFAM|tetracycline resistance ribosomal protection protein	5.6e-50	165.4	target protection
CP031223.1.region001	CP0312230004	ARO:3003064|ykkD|CAB13167.1	1.47e-36	117	efflux pump	aminoglycoside antibiotic;phenicol antibiotic;tetracycline antibiotic
CP031223.1.region001	CP0312230007	ARO:3003007|bmr|AAA22277.1	4.6e-142	407	efflux pump	acridine dye;disinfecting agents and intercalating dyes;fluoroquinolone antibiotic;nucleoside antibiotic;phenicol antibiotic
CP031263.1.region013	CP0312630007	ARO:3003748|oleC|AAA26793	2.05e-57	186	efflux pump	macrolide antibiotic
CP031263.1.region013	CP0312630025	BGC0001140|Resistance_gene|ACS13710.1	5.36e-77	238	target replacement	platensimycin/platencin
CP031263.1.region013	CP0312630034	ARO:3000535|macB|AAV85982.1	4.2e-39	140	efflux pump	macrolide antibiotic
CP031263.1.region019	CP0312630027	ARO:3003950|msbA|AAC74000.1	1.13e-104	327	efflux pump	nitroimidazole antibiotic
CP031263.1.region020	CP0312630002	ARO:3003748|oleC|AAA26793	1.42e-32	118	efflux pump	macrolide antibiotic
CP031263.1.region020	CP0312630007	ARO:3003950|msbA|AAC74000.1	3.57e-81	263	efflux pump	nitroimidazole antibiotic
CP031263.1.region020	CP0312630008	ARO:3003950|msbA|AAC74000.1	7.24e-71	236	efflux pump	nitroimidazole antibiotic
CP031263.1.region020	CP0312630019	ARO:3000815|mgrA|BAB41874.1	6.88e-34	113	efflux pump	acridine dye;cephalosporin;disinfecting agents and intercalating dyes;fluoroquinolone antibiotic;penam;peptide antibiotic;tetracycline antibiotic
CP031310.1.region001	CP0313100017	ribo_prot_ABC_F-NCBIFAM|ABC-F type ribosomal protection protein	1.3e-49	164.5	target protection
CP031357.1.region003	CP0313570008	ARO:3003801|bcr-1|ALV80601.1	3.8e-38	139	efflux pump	bicyclomycin
CP031700.1.region001	CP0317000009	ARO:3004077|PmpM|AAG04750.1	4.6e-97	297	efflux pump	aminoglycoside antibiotic;benzalkonium chloride;fluoroquinolone antibiotic
CP031700.1.region001	CP0317000013	tet_ABC_46_B-NCBIFAM|tetracycline efflux ABC transporter Tet(46) subunit B	1.6e-38	127.8	efflux pump
CP031966.1.region009	CP0319660008	ARO:3000535|macB|AAV85982.1	8.73e-46	157	efflux pump	macrolide antibiotic
CP031969.1.region004	CP0319690009	ribo_prot_ABC_F-NCBIFAM|ABC-F type ribosomal protection protein	2.5e-32	107.5	target protection
CP031969.1.region024	CP0319690023	ARO:3000444|rphA|AIA08936.1	0	1261	product inactivation	rifamycin antibiotic
CP032050.1.region001	CP0320500010	ARO:3000378|MexB|AAA74437.1	1.52e-53	202	efflux pump	aminocoumarin antibiotic;carbapenem;cephalosporin;cephamycin;diaminopyrimidine antibiotic;fluoroquinolone antibiotic;macrolide antibiotic;monobactam;penam;penem;peptide antibiotic;phenicol antibiotic;sulfonamide antibiotic;tetracycline antibiotic
CP032125.1.region004	CP0321250006	ARO:3003689|MCR-1|AKF16168	1.2e-103	319	target alteration	peptide antibiotic
CP032153.1.region005	CP0321530012	ARO:3002970|vanTC|AAD22403.1	4.09e-33	127	target alteration	glycopeptide antibiotic
CP032153.1.region005	CP0321530018	BGC0000579|daunorubicin_resistance_protein_DrrA_family_ABC_transporter_ATP-binding_protein|WP_007385816.1	1.61e-33	120	efflux pump	SSV-2083
CP032228.1.region003	CP0322280007	ARO:3003801|bcr-1|ALV80601.1	1.42e-36	134	efflux pump	bicyclomycin
CP032521.1.region007	CP0325210012	ARO:3002970|vanTC|AAD22403.1	2.88e-33	128	target alteration	glycopeptide antibiotic
CP032521.1.region007	CP0325210018	BGC0000579|daunorubicin_resistance_protein_DrrA_family_ABC_transporter_ATP-binding_protein|WP_007385816.1	1.61e-33	120	efflux pump	SSV-2083
CP033434.1.region003	CP0334340001	ARO:3002829|vgaA|AAA26684.1	1.15e-47	172	target protection	lincosamide antibiotic;macrolide antibiotic;oxazolidinone antibiotic;phenicol antibiotic;pleuromutilin antibiotic;streptogramin antibiotic;tetracycline antibiotic
CP033442.1.region005	CP0334420019	ARO:3002829|vgaA|AAA26684.1	1.15e-47	172	target protection	lincosamide antibiotic;macrolide antibiotic;oxazolidinone antibiotic;phenicol antibiotic;pleuromutilin antibiotic;streptogramin antibiotic;tetracycline antibiotic
CP033581.1.region004	CP0335810004	ARO:3002919|vanRA|AAA65953.1	1.27e-39	134	target alteration	glycopeptide antibiotic
CP033581.1.region006	CP0335810008	ARO:3003950|msbA|AAC74000.1	3.68e-55	193	efflux pump	nitroimidazole antibiotic
CP033581.1.region009	CP0335810032	BGC0001140|Resistance_gene|ACS13710.1	1.16e-31	117	target replacement	platensimycin/platencin
CP033581.1.region009	CP0335810040	BGC0001611|glyoxalase/bleomycin_resistance_protein|ATY69562.1	2.46e-43	132	product inactivate
CP033581.1.region009	CP0335810044	ARO:3002892|otr(B)|AAD04032.1	8e-71	233	efflux pump	tetracycline antibiotic
CP033581.1.region019	CP0335810011	ARO:3003950|msbA|AAC74000.1	1.51e-40	154	efflux pump	nitroimidazole antibiotic
CP033581.1.region027	CP0335810002	BGC0001655|daunorubicin_resistance_protein_DrrA_family_ABC_transporter_ATP-binding_protein|WP_017534155.1	4.57e-33	115	efflux pump	LP2006
CP034587.1.region005	CP0345870002	ARO:3004613|Tet(47)|AKQ05891.1	2.01e-70	224	product inactivation	tetracycline antibiotic
CP034587.1.region005	CP0345870007	ARO:3002827|tlrC|AAA26832.1	1.18e-64	217	target protection	lincosamide antibiotic;macrolide antibiotic;oxazolidinone antibiotic;phenicol antibiotic;pleuromutilin antibiotic;streptogramin antibiotic;tetracycline antibiotic
CP034587.1.region006	CP0345870018	CHL_hydrolase-NCBIFAM|chloramphenicol hydrolase	9.9e-72	236.7	product inactivation
CP034587.1.region006	CP0345870037	cmx_cmrA-NCBIFAM|Cmx/CmrA family chloramphenicol efflux MFS transporter	4.3e-33	110.1	efflux pump
CP034587.1.region031	CP0345870003	ARO:3003967|lrfA|AAC43550.1	3.78e-37	140	efflux pump	fluoroquinolone antibiotic
CP034587.1.region031	CP0345870047	ARO:3002829|vgaA|AAA26684.1	9.46e-42	154	target protection	lincosamide antibiotic;macrolide antibiotic;oxazolidinone antibiotic;phenicol antibiotic;pleuromutilin antibiotic;streptogramin antibiotic;tetracycline antibiotic
CP034587.1.region031	CP0345870052	ARO:3000573|tet(43)|ACS83748.1	2.69e-34	132	efflux pump	tetracycline antibiotic
CP034587.1.region031	CP0345870055	ARO:3002883|rgt1438|AFO53532.1	7.87e-31	119	product inactivation	rifamycin antibiotic
CP034587.1.region031	CP0345870057	ARO:3003950|msbA|AAC74000.1	8.18e-76	250	efflux pump	nitroimidazole antibiotic
CP034587.1.region031	CP0345870058	ARO:3003950|msbA|AAC74000.1	6.18e-68	229	efflux pump	nitroimidazole antibiotic
CP034587.1.region031	CP0345870059	ARO:3002661|APH(7'')-Ia|CAA27276.1	2.59e-144	407	product inactivation	aminoglycoside antibiotic
CP034587.1.region031	CP0345870080	ARO:3003967|lrfA|AAC43550.1	6.07e-71	231	efflux pump	fluoroquinolone antibiotic
CP035310.1.region004	CP0353100017	ARO:3003801|bcr-1|ALV80601.1	3.68e-38	139	efflux pump	bicyclomycin
CP035632.1.region006	CP0356320020	ARO:3002919|vanRA|AAA65953.1	2.73e-49	159	target alteration	glycopeptide antibiotic
CP035914.1.region003	CP0359140002	ARO:3002919|vanRA|AAA65953.1	9.29e-51	162	target alteration	glycopeptide antibiotic
CP036264.1.region001	CP0362640007	BGC0001140|Resistance_gene|ACS13710.1	1.69e-47	161	target replacement	platensimycin/platencin
CP036264.1.region009	CP0362640013	ARO:3003748|oleC|AAA26793	7.91e-39	136	efflux pump	macrolide antibiotic
CP036272.1.region002	CP0362720011	BGC0001140|Resistance_gene|ACS13710.1	2.2e-49	166	target replacement	platensimycin/platencin
CP036276.1.region002	CP0362760015	ribo_prot_ABC_F-NCBIFAM|ABC-F type ribosomal protection protein	5.5e-38	126.2	target protection
CP036276.1.region004	CP0362760014	ARO:3003730|Bifidobacteria|ADP36409.1	1.92e-129	421	target alteration	mupirocin
CP036279.1.region002	CP0362790015	HK_VanS_ACDEFG-NCBIFAM|vancomycin resistance histidine kinase VanS	2e-37	124.1	target protection
CP036279.1.region006	CP0362790003	ARO:3003748|oleC|AAA26793	4.02e-36	129	efflux pump	macrolide antibiotic
CP036298.1.region002	CP0362980001	BGC0000333|daunorubicin_resistance_ABC_transporter_ATPase_subunit|ABW00319.1	1.73e-33	119	efflux pump	cyclomarin D
CP036319.1.region007	CP0363190015	ARO:3003748|oleC|AAA26793	6.43e-37	131	efflux pump	macrolide antibiotic
CP036423.1.region001	CP0364230006	ARO:3000195|tetB(P)|AAA20117.1	1.86e-71	242	target protection	tetracycline antibiotic
CP036423.1.region001	CP0364230020	ARO:3002829|vgaA|AAA26684.1	6.74e-42	156	target protection	lincosamide antibiotic;macrolide antibiotic;oxazolidinone antibiotic;phenicol antibiotic;pleuromutilin antibiotic;streptogramin antibiotic;tetracycline antibiotic
CP036426.1.region005	CP0364260005	ARO:3003748|oleC|AAA26793	2.17e-32	119	efflux pump	macrolide antibiotic
CP036426.1.region006	CP0364260015	tet_protect-NCBIFAM|tetracycline resistance ribosomal protection protein	1.4e-47	157.5	target protection
CP036534.1.region005	CP0365340006	ARO:3004573|Acinetobacter|ABO11759.2	2.49e-70	228	efflux pump	fosfomycin
CP036534.1.region029	CP0365340037	ABCF_producer-NCBIFAM|TlrC/CarA/OleB/SrmB family ABC-F type ribosomal protection protein	6.2e-33	109.2	target protection
CP036534.1.region029	CP0365340046	ARO:3003950|msbA|AAC74000.1	2.45e-61	210	efflux pump	nitroimidazole antibiotic
CP036534.1.region029	CP0365340047	ARO:3003950|msbA|AAC74000.1	5.23e-61	209	efflux pump	nitroimidazole antibiotic
CP038147.1.region001	CP0381470035	BGC0001140|Resistance_gene|ACS13710.1	5.12e-58	189	target replacement	platensimycin/platencin
CP038147.1.region001	CP0381470038	rif_monoox-NCBIFAM|rifampin monooxygenase	8.6e-42	138.8	product inactivation
CP038147.1.region001	CP0381470044	ARO:3004611|Escherichia|CBJ02047.1	3.84e-44	160	product inactivation	cephalosporin;penam
CP038147.1.region006	CP0381470013	ARO:3000535|macB|AAV85982.1	2.84e-32	122	efflux pump	macrolide antibiotic
CP038147.1.region009	CP0381470007	ARO:3000573|tet(43)|ACS83748.1	1.46e-33	130	efflux pump	tetracycline antibiotic
CP038147.1.region024	CP0381470002	ARO:3003950|msbA|AAC74000.1	1.43e-42	159	efflux pump	nitroimidazole antibiotic
CP040367.1.region003	CP0403670007	ARO:3003724|vanWI|BAE83690.1	1.51e-36	131	target alteration	glycopeptide antibiotic
CP040396.1.region003	CP0403960002	arsB_Sta_pI258-NCBIFAM|arsenite efflux transporter membrane subunit ArsB	2.8e-212	700.7	efflux pump
CP040517.1.region008	CP0405170016	ARO:3002985|arnA|AAG06942.1	7.57e-34	127	target alteration	peptide antibiotic
CP040676.1.region001	CP0406760015	ARO:3000829|baeS|BAA15934.1	8.63e-31	124	efflux pump	aminocoumarin antibiotic;aminoglycoside antibiotic
CP040747.1.region004	CP0407470013	ARO:3001327|mdtK|AML99881.1	7.39e-36	135	efflux pump	fluoroquinolone antibiotic
CP040749.1.region003	CP0407490003	ARO:3002987|bcrA|AAA99504.1	7.48e-33	118	efflux pump	peptide antibiotic
CP040887.1.region001	CP0408870014	ARO:3003748|oleC|AAA26793	6.03e-58	186	efflux pump	macrolide antibiotic
CP040887.1.region001	CP0408870017	ARO:3003950|msbA|AAC74000.1	9.46e-84	272	efflux pump	nitroimidazole antibiotic
CP041063.1.region004	CP0410630003	ARO:3003950|msbA|AAC74000.1	8.32e-83	270	efflux pump	nitroimidazole antibiotic
CP041063.1.region004	CP0410630004	ARO:3003950|msbA|AAC74000.1	1.81e-72	240	efflux pump	nitroimidazole antibiotic
CP041185.1.region001	CP0411850012	ARO:3003679|TriA|AAG03546.1	1.34e-40	145	efflux pump	triclosan
CP041185.1.region001	CP0411850013	ARO:3000378|MexB|AAA74437.1	1.24e-32	134	efflux pump	aminocoumarin antibiotic;carbapenem;cephalosporin;cephamycin;diaminopyrimidine antibiotic;fluoroquinolone antibiotic;macrolide antibiotic;monobactam;penam;penem;peptide antibiotic;phenicol antibiotic;sulfonamide antibiotic;tetracycline antibiotic
CP041186.1.region001	CP0411860001	vanR_FM-NCBIFAM|VanR-FM family response regulator transcription factor	4e-35	116.7	target alteration
CP041186.1.region001	CP0411860007	HK_VanS_ACDEFG-NCBIFAM|vancomycin resistance histidine kinase VanS	1.2e-36	121.6	target protection
CP041222.1.region004	CP0412220019	ARO:3003801|bcr-1|ALV80601.1	5.12e-32	122	efflux pump	bicyclomycin
CP041244.1.region007	CP0412440005	ARO:3000535|macB|AAV85982.1	4.31e-39	141	efflux pump	macrolide antibiotic
CP041244.1.region007	CP0412440014	ARO:3003967|lrfA|AAC43550.1	1.24e-68	226	efflux pump	fluoroquinolone antibiotic
CP041244.1.region009	CP0412440003	ARO:3003748|oleC|AAA26793	1.72e-34	125	efflux pump	macrolide antibiotic
CP041244.1.region014	CP0412440003	ARO:3003047|qacB|AAQ10694.1	8.05e-37	139	efflux pump	fluoroquinolone antibiotic
CP041244.1.region014	CP0412440018	ARO:3004572|Staphylococcus|AAW38464.1	9.81e-70	228	efflux pump	aminoglycoside antibiotic;diaminopyrimidine antibiotic;macrolide antibiotic;oxazolidinone antibiotic;phenicol antibiotic
CP041244.1.region015	CP0412440004	ARO:3002941|vanSO|AHA41504.1	1.84e-122	355	target alteration	glycopeptide antibiotic
CP041244.1.region016	CP0412440020	ARO:3003967|lrfA|AAC43550.1	6.26e-38	142	efflux pump	fluoroquinolone antibiotic
CP041244.1.region020	CP0412440007	ARO:3003950|msbA|AAC74000.1	1.08e-35	138	efflux pump	nitroimidazole antibiotic
CP041244.1.region020	CP0412440008	ARO:3003950|msbA|AAC74000.1	2.91e-46	168	efflux pump	nitroimidazole antibiotic
CP041637.1.region001	CP0416370003	ARO:3002942|vanHA|AAA65955.1	3.01e-58	187	target alteration	glycopeptide antibiotic
CP042241.1.region001	CP0422410024	ARO:3003748|oleC|AAA26793	1.8e-39	138	efflux pump	macrolide antibiotic
CP042862.1.region001	CP0428620015	ARO:3003748|oleC|AAA26793	3.24e-60	192	efflux pump	macrolide antibiotic
CP043056.1.region008	CP0430560016	tet_ABC_46_A-NCBIFAM|tetracycline efflux ABC transporter Tet(46) subunit A	2e-32	107.7	efflux pump
CP043056.1.region015	CP0430560020	ARO:3000378|MexB|AAA74437.1	1.71e-35	142	efflux pump	aminocoumarin antibiotic;carbapenem;cephalosporin;cephamycin;diaminopyrimidine antibiotic;fluoroquinolone antibiotic;macrolide antibiotic;monobactam;penam;penem;peptide antibiotic;phenicol antibiotic;sulfonamide antibiotic;tetracycline antibiotic
CP043317.1.region009	CP0433170008	ARO:3003950|msbA|AAC74000.1	6.09e-61	209	efflux pump	nitroimidazole antibiotic
CP043317.1.region009	CP0433170009	ARO:3003950|msbA|AAC74000.1	4.21e-61	210	efflux pump	nitroimidazole antibiotic
CP043317.1.region009	CP0433170018	ABCF_producer-NCBIFAM|TlrC/CarA/OleB/SrmB family ABC-F type ribosomal protection protein	5e-33	109.5	target protection
CP043317.1.region033	CP0433170015	ARO:3004573|Acinetobacter|ABO11759.2	3.93e-70	228	efflux pump	fosfomycin
CP043808.1.region001	CP0438080014	ARO:3003748|oleC|AAA26793	5.27e-57	184	efflux pump	macrolide antibiotic
CP044407.1.region006	CP0444070001	BGC0001658|Daunorubicin/doxorubicin_resistance_ABC_transporter_permease_protein_DrrB|OAP25823.1	2.03e-40	135	efflux pump	macrotermycins
CP044407.1.region006	CP0444070002	ARO:3003748|oleC|AAA26793	1.66e-98	291	efflux pump	macrolide antibiotic
CP044407.1.region011	CP0444070012	ARO:3002942|vanHA|AAA65955.1	6.16e-34	124	target alteration	glycopeptide antibiotic
CP044407.1.region011	CP0444070018	ARO:3003967|lrfA|AAC43550.1	5.94e-35	134	efflux pump	fluoroquinolone antibiotic
CP044407.1.region011	CP0444070024	ribo_prot_ABC_F-NCBIFAM|ABC-F type ribosomal protection protein	2.4e-47	157.1	target protection
CP044407.1.region011	CP0444070048	ARO:3003981|tetB(48)|APB03215.1	2.76e-72	218	efflux pump	tetracycline antibiotic
CP044407.1.region011	CP0444070049	ARO:3003748|oleC|AAA26793	6.88e-89	267	efflux pump	macrolide antibiotic
CP044407.1.region011	CP0444070064	BGC0001140|Resistance_gene|ACS13710.1	2.09e-78	242	target replacement	platensimycin/platencin
CP044407.1.region011	CP0444070073	vanH_gen-NCBIFAM|D-lactate dehydrogenase VanH	5.9e-36	119.3	target alteration
CP044407.1.region014	CP0444070005	ARO:3003748|oleC|AAA26793	3.2e-41	143	efflux pump	macrolide antibiotic
CP044407.1.region016	CP0444070015	ARO:3004652|Erm(O)-lrm|AAA26779.1	1.24e-31	114	target alteration	lincosamide antibiotic;macrolide antibiotic;streptogramin antibiotic
CP045119.1.region006	CP0451190003	BGC0001655|daunorubicin_resistance_protein_DrrA_family_ABC_transporter_ATP-binding_protein|WP_017534155.1	4.3e-33	116	efflux pump	LP2006
CP045119.1.region009	CP0451190014	ARO:3000444|rphA|AIA08936.1	2.51e-65	233	product inactivation	rifamycin antibiotic
CP045121.1.region006	CP0451210004	ARO:3000535|macB|AAV85982.1	6.04e-60	197	efflux pump	macrolide antibiotic
CP045325.1.region014	CP0453250023	ARO:3003748|oleC|AAA26793	3.3e-44	149	efflux pump	macrolide antibiotic
CP045325.1.region014	CP0453250027	ARO:3004613|Tet(47)|AKQ05891.1	1.6e-39	143	product inactivation	tetracycline antibiotic
CP045392.1.region004	CP0453920014	ARO:3003801|bcr-1|ALV80601.1	4.46e-42	149	efflux pump	bicyclomycin
CP045393.1.region002	CP0453930003	ARO:3004107|Pseudomonas|AAG05661.1	3.67e-41	132	efflux pump	acridine dye;cephalosporin;disinfecting agents and intercalating dyes;fluoroquinolone antibiotic;glycylcycline;penam;phenicol antibiotic;rifamycin antibiotic;tetracycline antibiotic;triclosan
CP045393.1.region007	CP0453930018	ARO:3005091|RanA|ADZ12699.1	2.35e-34	124	efflux pump	aminoglycoside antibiotic
CP045403.1.region003	CP0454030016	ARO:3001327|mdtK|AML99881.1	1.09e-35	134	efflux pump	fluoroquinolone antibiotic
CP045410.1.region002	CP0454100019	ARO:3004107|Pseudomonas|AAG05661.1	9.88e-41	131	efflux pump	acridine dye;cephalosporin;disinfecting agents and intercalating dyes;fluoroquinolone antibiotic;glycylcycline;penam;phenicol antibiotic;rifamycin antibiotic;tetracycline antibiotic;triclosan
CP045410.1.region007	CP0454100001	ARO:3005091|RanA|ADZ12699.1	2.35e-34	124	efflux pump	aminoglycoside antibiotic
CP045417.1.region003	CP0454170019	ARO:3004451|Agrobacterium|AAA22081.1	5.56e-46	148	product inactivation	phenicol antibiotic
CP045851.1.region007	CP0458510017	ARO:3002891|otr(A)|CAA37477.1	7.13e-41	154	target protection	tetracycline antibiotic
CP045929.1.region002	CP0459290013	ARO:3002827|tlrC|AAA26832.1	1.05e-54	190	target protection	lincosamide antibiotic;macrolide antibiotic;oxazolidinone antibiotic;phenicol antibiotic;pleuromutilin antibiotic;streptogramin antibiotic;tetracycline antibiotic
CP046104.1.region005	CP0461040012	ARO:3003950|msbA|AAC74000.1	2.03e-69	233	efflux pump	nitroimidazole antibiotic
CP046104.1.region005	CP0461040013	ARO:3003950|msbA|AAC74000.1	1.16e-76	251	efflux pump	nitroimidazole antibiotic
CP046104.1.region006	CP0461040001	ARO:3003950|msbA|AAC74000.1	9.33e-102	319	efflux pump	nitroimidazole antibiotic
CP046104.1.region012	CP0461040004	BGC0001011|drug_resistance_related_regulator|ABC87517.1	7.6e-39	123	efflux pump	meridamycin
CP046535.1.region003	CP0465350002	ARO:3002829|vgaA|AAA26684.1	2.61e-42	157	target protection	lincosamide antibiotic;macrolide antibiotic;oxazolidinone antibiotic;phenicol antibiotic;pleuromutilin antibiotic;streptogramin antibiotic;tetracycline antibiotic
CP046535.1.region003	CP0465350026	ARO:3000535|macB|AAV85982.1	1.86e-55	185	efflux pump	macrolide antibiotic
CP047026.1.region001	CP0470260008	ARO:3002942|vanHA|AAA65955.1	8.93e-39	137	target alteration	glycopeptide antibiotic
CP047027.1.region001	CP0470270002	ARO:3000378|MexB|AAA74437.1	2.7e-62	228	efflux pump	aminocoumarin antibiotic;carbapenem;cephalosporin;cephamycin;diaminopyrimidine antibiotic;fluoroquinolone antibiotic;macrolide antibiotic;monobactam;penam;penem;peptide antibiotic;phenicol antibiotic;sulfonamide antibiotic;tetracycline antibiotic
CP047028.1.region001	CP0470280003	ARO:3002942|vanHA|AAA65955.1	1.05e-56	184	target alteration	glycopeptide antibiotic
CP047670.1.region004	CP0476700011	ARO:3002970|vanTC|AAD22403.1	1.04e-34	132	target alteration	glycopeptide antibiotic
CP047670.1.region004	CP0476700017	BGC0000579|daunorubicin_resistance_protein_DrrA_family_ABC_transporter_ATP-binding_protein|WP_007385816.1	2.7e-33	120	efflux pump	SSV-2083
CP047955.1.region003	CP0479550003	ARO:3002919|vanRA|AAA65953.1	4.47e-47	153	target alteration	glycopeptide antibiotic
CP047956.1.region002	CP0479560003	ARO:3002919|vanRA|AAA65953.1	2.5e-48	156	target alteration	glycopeptide antibiotic
CP047957.1.region004	CP0479570004	ARO:3000535|macB|AAV85982.1	2.38e-46	160	efflux pump	macrolide antibiotic
CP047957.1.region004	CP0479570006	ARO:3000561|tet(30)|AAD09860.1	2.97e-38	139	efflux pump	tetracycline antibiotic
CP047957.1.region004	CP0479570016	ARO:3000833|evgS|AAC75429.1	2.28e-40	158	efflux pump	fluoroquinolone antibiotic;macrolide antibiotic;penam;tetracycline antibiotic
CP048620.1.region001	CP0486200001	ARO:3000510|mupB|AEY83581	4.66e-85	291	target alteration	mupirocin
CP048620.1.region001	CP0486200015	ARO:3002985|arnA|AAG06942.1	7.42e-50	172	target alteration	peptide antibiotic
CP048685.1.region005	CP0486850008	BGC0001140|Resistance_gene|ACS13710.1	2.95e-38	136	target replacement	platensimycin/platencin
CP048882.1.region010	CP0488820008	vanR-B-NCBIFAM|VanB-type vancomycin resistance response regulator transcription factor VanR	3.5e-40	133	target alteration
CP048882.1.region011	CP0488820003	ARO:3003748|oleC|AAA26793	4.37e-36	129	efflux pump	macrolide antibiotic
CP048882.1.region011	CP0488820005	ARO:3003748|oleC|AAA26793	4.79e-31	117	efflux pump	macrolide antibiotic
CP049109.1.region001	CP0491090008	ARO:3003950|msbA|AAC74000.1	4.77e-81	263	efflux pump	nitroimidazole antibiotic
CP049616.1.region004	CP0496160002	ARO:3000378|MexB|AAA74437.1	3.02e-58	216	efflux pump	aminocoumarin antibiotic;carbapenem;cephalosporin;cephamycin;diaminopyrimidine antibiotic;fluoroquinolone antibiotic;macrolide antibiotic;monobactam;penam;penem;peptide antibiotic;phenicol antibiotic;sulfonamide antibiotic;tetracycline antibiotic
CP050451.1.region002	CP0504510015	ARO:3003010|ceoB|AAB58161.1	2.64e-36	145	efflux pump	aminoglycoside antibiotic;fluoroquinolone antibiotic
CP050454.1.region003	CP0504540015	ARO:3003680|TriB|AAG03547.1	4.23e-31	116	efflux pump	triclosan
CP050454.1.region003	CP0504540016	ARO:3003010|ceoB|AAB58161.1	2.1e-37	149	efflux pump	aminoglycoside antibiotic;fluoroquinolone antibiotic
CP050454.1.region007	CP0504540003	ARO:3000074|emrB|AAC75733.1	3.33e-69	227	efflux pump	fluoroquinolone antibiotic
CP051299.1.region004	CP0512990011	HK_VanS_ACDEFG-NCBIFAM|vancomycin resistance histidine kinase VanS	6.2e-33	109.3	target protection
CP051461.1.region004	CP0514610019	ARO:3005068|ParR|AAG05188.1	4.22e-31	111	efflux pump	acridine dye;aminoglycoside antibiotic;carbapenem;cephalosporin;cephamycin;disinfecting agents and intercalating dyes;fluoroquinolone antibiotic;macrolide antibiotic;monobactam;penam;penem;phenicol antibiotic;tetracycline antibiotic
CP054916.1.region034	CP0549160004	ARO:3002881|lmrC|ABX00624.1	5.13e-65	206	target protection	lincosamide antibiotic;macrolide antibiotic;oxazolidinone antibiotic;phenicol antibiotic;pleuromutilin antibiotic;streptogramin antibiotic;tetracycline antibiotic
CP054916.1.region034	CP0549160023	ARO:3003950|msbA|AAC74000.1	1.03e-62	216	efflux pump	nitroimidazole antibiotic
CP054920.1.region011	CP0549200021	ARO:3002919|vanRA|AAA65953.1	2.01e-39	133	target alteration	glycopeptide antibiotic
CP054920.1.region011	CP0549200022	ARO:3000839|arlS|ABD30512.1	3.77e-38	142	efflux pump	acridine dye;disinfecting agents and intercalating dyes;fluoroquinolone antibiotic
CP054920.1.region011	CP0549200025	ARO:3003047|qacB|AAQ10694.1	3.2e-35	134	efflux pump	fluoroquinolone antibiotic
CP054920.1.region023	CP0549200012	ARO:3004573|Acinetobacter|ABO11759.2	4.75e-70	227	efflux pump	fosfomycin
CP054923.1.region019	CP0549230019	ARO:3003950|msbA|AAC74000.1	2.61e-97	308	efflux pump	nitroimidazole antibiotic
CP054923.1.region020	CP0549230001	ARO:3002625|ANT(4')-IIb|AAM76670.1	2.4e-33	123	product inactivation	aminoglycoside antibiotic
CP054923.1.region020	CP0549230002	ARO:3003748|oleC|AAA26793	6.87e-32	116	efflux pump	macrolide antibiotic
CP054923.1.region020	CP0549230006	ARO:3003950|msbA|AAC74000.1	1.16e-67	228	efflux pump	nitroimidazole antibiotic
CP054923.1.region020	CP0549230007	ARO:3003950|msbA|AAC74000.1	6.17e-66	224	efflux pump	nitroimidazole antibiotic
CP054929.1.region014	CP0549290016	ARO:3002919|vanRA|AAA65953.1	3.45e-40	136	target alteration	glycopeptide antibiotic
CP054929.1.region019	CP0549290002	ARO:3002663|APH(9)-Ib|AAB66655.1	6.91e-104	305	product inactivation	aminoglycoside antibiotic
CP054929.1.region031	CP0549290036	ARO:3002985|arnA|AAG06942.1	1.57e-42	152	target alteration	peptide antibiotic
CP054929.1.region031	CP0549290046	ARO:3003950|msbA|AAC74000.1	1.34e-35	138	efflux pump	nitroimidazole antibiotic
CP054929.1.region031	CP0549290047	ARO:3003950|msbA|AAC74000.1	1.64e-41	155	efflux pump	nitroimidazole antibiotic
CP054932.1.region004	CP0549320014	ARO:3000535|macB|AAV85982.1	6.84e-39	140	efflux pump	macrolide antibiotic
CP054932.1.region020	CP0549320009	ARO:3003950|msbA|AAC74000.1	6.28e-50	179	efflux pump	nitroimidazole antibiotic
CP054932.1.region021	CP0549320021	BGC0001378|glyoxalase/bleomycin_resisance_protein/dioxygenase|AME18022.1	1.49e-36	115	product inactivate
CP054938.1.region010	CP0549380011	ARO:3002914|vanJ|CAB45459.1	2.21e-122	352	target alteration	glycopeptide antibiotic
CP054938.1.region010	CP0549380013	ARO:3003748|oleC|AAA26793	1.9e-169	471	efflux pump	macrolide antibiotic
CP054938.1.region010	CP0549380014	ARO:3003981|tetB(48)|APB03215.1	1.29e-49	162	efflux pump	tetracycline antibiotic
CP054938.1.region013	CP0549380001	ARO:3003727|vanKI|BAE85481.1	9.09e-89	271	target alteration	glycopeptide antibiotic
CP054939.1.region020	CP0549390047	ARO:3000074|emrB|AAC75733.1	1.24e-35	136	efflux pump	fluoroquinolone antibiotic
CP054939.1.region020	CP0549390054	BGC0001140|Resistance_gene|ACS13710.1	7.93e-58	188	target replacement	platensimycin/platencin
CP054939.1.region020	CP0549390057	rif_monoox-NCBIFAM|rifampin monooxygenase	8.1e-44	145.4	product inactivation
CP056041.1.region003	CP0560410019	ARO:3002693|cmlA1|AAA26057.1	6.78e-36	133	efflux pump	phenicol antibiotic
CP056041.1.region017	CP0560410011	ARO:3000535|macB|AAV85982.1	1.19e-32	122	efflux pump	macrolide antibiotic
CP056041.1.region037	CP0560410011	ARO:3003748|oleC|AAA26793	6.81e-85	257	efflux pump	macrolide antibiotic
CP056041.1.region037	CP0560410015	ARO:3005091|RanA|ADZ12699.1	1.3e-36	130	efflux pump	aminoglycoside antibiotic
CP058670.1.region004	CP0586700011	HK_VanS_ACDEFG-NCBIFAM|vancomycin resistance histidine kinase VanS	6.9e-35	115.8	target protection
CP060139.1.region001	CP0601390016	ARO:3000195|tetB(P)|AAA20117.1	9.84e-40	150	target protection	tetracycline antibiotic
CP060395.1.region001	CP0603950001	ARO:3002919|vanRA|AAA65953.1	1.14e-47	155	target alteration	glycopeptide antibiotic
CP060397.1.region009	CP0603970016	ARO:3003980|tetA(48)|APB03214.1	5.69e-32	121	efflux pump	tetracycline antibiotic
CP060494.1.region001	CP0604940018	ARO:3003950|msbA|AAC74000.1	3.26e-77	253	efflux pump	nitroimidazole antibiotic
CP061725.1.region005	CP0617250025	ARO:3003730|Bifidobacteria|ADP36409.1	0	617	target alteration	mupirocin
CP061725.1.region015	CP0617250014	ARO:3003950|msbA|AAC74000.1	8.83e-65	220	efflux pump	nitroimidazole antibiotic
CP061725.1.region015	CP0617250015	ARO:3003950|msbA|AAC74000.1	1.26e-74	246	efflux pump	nitroimidazole antibiotic
CP061725.1.region015	CP0617250017	ARO:3002625|ANT(4')-IIb|AAM76670.1	4.11e-34	125	product inactivation	aminoglycoside antibiotic
CP061725.1.region016	CP0617250002	ARO:3003950|msbA|AAC74000.1	2.92e-95	302	efflux pump	nitroimidazole antibiotic
CP061947.1.region001	CP0619470013	ARO:3003748|oleC|AAA26793	9.2e-38	133	efflux pump	macrolide antibiotic
CP062941.1.region002	CP0629410016	ARO:3003961|farA|AAF40763.1	2.54e-43	152	efflux pump	antibacterial free fatty acids
CP062941.1.region002	CP0629410017	ARO:3000074|emrB|AAC75733.1	8.81e-70	229	efflux pump	fluoroquinolone antibiotic
CP062941.1.region002	CP0629410018	ARO:3000802|OprJ|AAB41958.1	3.23e-60	202	efflux pump	aminocoumarin antibiotic;aminoglycoside antibiotic;cephalosporin;diaminopyrimidine antibiotic;fluoroquinolone antibiotic;macrolide antibiotic;penam;phenicol antibiotic;tetracycline antibiotic
CP062941.1.region004	CP0629410002	ARO:3002700|cmlv|AAB36568.1	1.04e-31	122	product inactivation	phenicol antibiotic
CP062983.1.region001	CP0629830010	ARO:3000833|evgS|AAC75429.1	2.13e-33	131	efflux pump	fluoroquinolone antibiotic;macrolide antibiotic;penam;tetracycline antibiotic
CP062983.1.region001	CP0629830015	ARO:3000180|tetA(P)|AAA20116.1	1.58e-53	180	efflux pump	tetracycline antibiotic
CP064760.1.region003	CP0647600003	ARO:3003748|oleC|AAA26793	1.77e-41	142	efflux pump	macrolide antibiotic
CP064783.1.region001	CP0647830011	ribo_prot_ABC_F-NCBIFAM|ABC-F type ribosomal protection protein	2.5e-31	104.2	target protection
CP064783.1.region001	CP0647830019	BGC0001611|glyoxalase/bleomycin_resistance_protein|ATY69562.1	2.82e-35	111	product inactivate
CP064783.1.region001	CP0647830021	BGC0001447|Glyoxalase/bleomycin_resistance_protein/dioxygenase|EHK80150.1	1.75e-68	196	product inactivate
CP064783.1.region001	CP0647830056	ARO:3004573|Acinetobacter|ABO11759.2	2.04e-139	404	efflux pump	fosfomycin
CP064908.1.region002	CP0649080001	ARO:3002919|vanRA|AAA65953.1	2.53e-49	159	target alteration	glycopeptide antibiotic
CP065229.1.region002	CP0652290016	ARO:3003801|bcr-1|ALV80601.1	6.08e-35	130	efflux pump	bicyclomycin
CP065230.1.region001	CP0652300018	ARO:3003748|oleC|AAA26793	2.96e-40	140	efflux pump	macrolide antibiotic
CP065230.1.region001	CP0652300021	ARO:3005063|cprR|AAG06465.1	4.29e-64	196	efflux pump	peptide antibiotic
CP071798.1.region003	CP0717980001	ARO:3005091|RanA|ADZ12699.1	1.4e-33	122	efflux pump	aminoglycoside antibiotic
CP071798.1.region003	CP0717980012	ARO:3002829|vgaA|AAA26684.1	7.92e-45	162	target protection	lincosamide antibiotic;macrolide antibiotic;oxazolidinone antibiotic;phenicol antibiotic;pleuromutilin antibiotic;streptogramin antibiotic;tetracycline antibiotic
CP071798.1.region003	CP0717980014	ARO:3000617|mecA|AGC51118.1	6.48e-124	380	target replacement	carbapenem;cephalosporin;cephamycin;monobactam;penam
CP072852.1.region004	CP0728520004	ARO:3000378|MexB|AAA74437.1	1.03e-47	182	efflux pump	aminocoumarin antibiotic;carbapenem;cephalosporin;cephamycin;diaminopyrimidine antibiotic;fluoroquinolone antibiotic;macrolide antibiotic;monobactam;penam;penem;peptide antibiotic;phenicol antibiotic;sulfonamide antibiotic;tetracycline antibiotic
CP072852.1.region004	CP0728520005	ARO:3003679|TriA|AAG03546.1	1.63e-48	166	efflux pump	triclosan
CP075523.1.region003	CP0755230006	ARO:3000833|evgS|AAC75429.1	9.1e-44	169	efflux pump	fluoroquinolone antibiotic;macrolide antibiotic;penam;tetracycline antibiotic
CP075523.1.region003	CP0755230012	ARO:3000183|tet(Z)|AAD25063.1	8.08e-34	127	efflux pump	tetracycline antibiotic
CP075523.1.region003	CP0755230014	ARO:3000535|macB|AAV85982.1	2.03e-43	152	efflux pump	macrolide antibiotic
CT971583.1.region005	CT9715830004	ARO:3000535|macB|AAV85982.1	8.56e-46	158	efflux pump	macrolide antibiotic
CT971583.1.region005	CT9715830006	ARO:3000173|tet(E)|AAA71915.1	2.69e-33	125	efflux pump	tetracycline antibiotic
CT971583.1.region005	CT9715830015	ARO:3000833|evgS|AAC75429.1	1.95e-42	164	efflux pump	fluoroquinolone antibiotic;macrolide antibiotic;penam;tetracycline antibiotic
CT978603.1.region001	CT9786030021	ARO:3002919|vanRA|AAA65953.1	5.19e-48	155	target alteration	glycopeptide antibiotic
DF260912.1.region005	DF2609120018	ARO:3002827|tlrC|AAA26832.1	9.99e-49	175	target protection	lincosamide antibiotic;macrolide antibiotic;oxazolidinone antibiotic;phenicol antibiotic;pleuromutilin antibiotic;streptogramin antibiotic;tetracycline antibiotic
FO538765.1.region003	FO5387650003	ARO:3000829|baeS|BAA15934.1	8.67e-33	124	efflux pump	aminocoumarin antibiotic;aminoglycoside antibiotic
FP565814.1.region005	FP5658140014	BGC0000832|clorobiocin-resistant_gyrase_B|AAN65247.1	7.76e-140	413	target alteration	clorobiocin
FR856862.1.region002	FR8568620010	ARO:3003801|bcr-1|ALV80601.1	1.03e-37	138	efflux pump	bicyclomycin
FR856862.1.region002	FR8568620016	resist_ArsN1b-NCBIFAM|arsinothricin resistance N-acetyltransferase ArsN1 family B	1.5e-41	137.1	product inactivation
GL947594.1.region003	GL9475940004	ARO:3002919|vanRA|AAA65953.1	4.73e-45	148	target alteration	glycopeptide antibiotic
GL947595.1.region003	GL9475950003	ARO:3002919|vanRA|AAA65953.1	1.5e-44	147	target alteration	glycopeptide antibiotic
HE796683.1.region002	HE7966830008	ARO:3000173|tet(E)|AAA71915.1	1.04e-61	202	efflux pump	tetracycline antibiotic
HF571520.1.region001	HF5715200002	BGC0000832|clorobiocin-resistant_gyrase_B|AAN65247.1	0	597	target alteration	clorobiocin
HG315671.1.region001	HG3156710018	ARO:3002942|vanHA|AAA65955.1	1.1e-62	199	target alteration	glycopeptide antibiotic
LN847356.1.region003	LN8473560003	ARO:3002919|vanRA|AAA65953.1	2.5e-48	156	target alteration	glycopeptide antibiotic
LT598496.1.region013	LT5984960018	ARO:3003980|tetA(48)|APB03214.1	6.86e-40	139	efflux pump	tetracycline antibiotic
LT598496.1.region015	LT5984960011	ARO:3003950|msbA|AAC74000.1	1.69e-67	228	efflux pump	nitroimidazole antibiotic
LT598496.1.region015	LT5984960012	ARO:3003950|msbA|AAC74000.1	1.54e-74	246	efflux pump	nitroimidazole antibiotic
LT598496.1.region015	LT5984960017	ARO:3003980|tetA(48)|APB03214.1	1.25e-34	124	efflux pump	tetracycline antibiotic
LT598496.1.region016	LT5984960002	ARO:3003950|msbA|AAC74000.1	2.37e-101	318	efflux pump	nitroimidazole antibiotic
LT629784.1.region008	LT6297840002	ARO:3000535|macB|AAV85982.1	4.79e-43	150	efflux pump	macrolide antibiotic
LT629784.1.region008	LT6297840016	ARO:3000510|mupB|AEY83581	1.27e-52	197	target alteration	mupirocin
LT702999.1.region001	LT7029990016	ARO:3003801|bcr-1|ALV80601.1	5.6e-36	134	efflux pump	bicyclomycin
LT703005.1.region001	LT7030050005	ARO:3003665|NmcR|CAA79966.1	3.2e-45	152	product inactivation	carbapenem;cephalosporin;cephamycin;penam
LT838813.1.region005	LT8388130009	ARO:3002936|vanSF|AAR84673.1	1.36e-31	122	target alteration	glycopeptide antibiotic
LT838813.1.region005	LT8388130010	ARO:3002919|vanRA|AAA65953.1	6.95e-56	175	target alteration	glycopeptide antibiotic
LT838813.1.region006	LT8388130012	BGC0000832|clorobiocin-resistant_gyrase_B|AAN65247.1	2.33e-178	512	target alteration	clorobiocin

## Sheet: FourBGCs
Supplementary Table S3. Putative Resistance Genes in Four typical Terpenoid BGCs and Inference of Putative Product Class
Marref_bgc_id	BGC_cds_id	Subject	Evalue	Bitscore	Resistance Machenism	Putative product class
CP016076.1.region008	CP0160760019	ARO:3004451|Agrobacterium|AAA22081.1	3.32e-41	137	product inactivation	phenicol antibiotic
CP017599.1.region025	CP0175990001	BGC0001140|Resistance_gene|ACS13710.1	1.85e-95	286	target replacement	platensimycin/platencin
CP017708.1.region027	CP0177080005	ARO:3000195|tetB(P)|AAA20117.1	6.45e-41	154	target protection	tetracycline antibiotic
CP028158.1.region019	CP0281580014	ARO:3002919|vanRA|AAA65953.1	6.68e-39	132	target alteration	glycopeptide antibiotic
