# Supplementary material for: A Comprehensive Self-Resistance Gene Database for Natural-Product Discovery with an Application to Marine Bacterial Genome Mining
Source: Int J Mol Sci. 2023 Aug 4;24(15):12446. doi: 10.3390/ijms241512446 (PMC10419868; doi:10.3390/ijms241512446)
Supplement: Supplementary file 1 [file ijms-24-12446-s001.zip › Supplementary_Table S4.xlsx]

## Sheet: Sheet1
	Supplementary Table S4: List of MarRef-BGCs encoding bioactive products, screened by self-resistance gene-directed natural-product discovery
MarRef_BGC_ID	BGC_CDS_ID	RGDB_Subject	E-value	Bit-score	Resistance Machenism	GCF	MIBiG	BGC type	Product-derivative
AP018165.1.region013	AP0181650031	glycotrans_Rgt-NCBIFAM|rifamycin-inactivating glycosyltransferase Rgt	1.8e-31	104.8	product inactivation	GCF_00166	BGC0000363 BGC0000364	NRP	glycopeptidolipid (no structure) glycopeptidolipid (no structure)
CP029188.1.region023	CP0291880087	rif_mono_Iri-NCBIFAM|rifampin monooxygenase Iri	1.4e-32	108.5	product inactivation	GCF_00538	BGC0000214 BGC0001074 BGC0001558 BGC0001568	PKS	cosmomycin B cosmomycin D cosmomycin C cytorhodin
CP029188.1.region023	CP0291880067	BGC0001140|Resistance_gene|ACS13710.1	5.37e-58	189	target replacement
CP031969.1.region015	CP0319690045	rif_monoox-NCBIFAM|rifampin monooxygenase	2.8e-43	143.7	product inactivation	GCF_00539	BGC0000215 BGC0000271 BGC0001366 BGC0001512	PKS	curamycin spore pigment (no structure) BE-24566B, zunyimycin A BE-24566B
CP031969.1.region015	CP0319690050	BGC0001140|Resistance_gene|ACS13710.1	7.46e-56	183	target replacement
CP031969.1.region015	CP0319690051	BGC0001140|Resistance_gene|ACS13710.1	4.92e-34	124	target replacement
CP036534.1.region018	CP0365340038	rif_monoox-NCBIFAM|rifampin monooxygenase	1.6e-41	137.8	product inactivation
CP036534.1.region018	CP0365340002	ARO:3002919|vanRA|AAA65953.1	1.45e-44	147	target alteration
CP036534.1.region018	CP0365340035	BGC0001140|Resistance_gene|ACS13710.1	2.97e-54	179	target replacement
CP038147.1.region001	CP0381470044	ARO:3004611|Escherichia|CBJ02047.1	3.84e-44	160	product inactivation
CP038147.1.region001	CP0381470038	rif_monoox-NCBIFAM|rifampin monooxygenase	8.6e-42	138.8	product inactivation
CP038147.1.region001	CP0381470035	BGC0001140|Resistance_gene|ACS13710.1	5.12e-58	189	target replacement
CP043317.1.region021	CP0433170031	rif_monoox-NCBIFAM|rifampin monooxygenase	1.1e-41	138.4	product inactivation
CP043317.1.region021	CP0433170067	ARO:3002919|vanRA|AAA65953.1	1.45e-44	147	target alteration
CP043317.1.region021	CP0433170034	BGC0001140|Resistance_gene|ACS13710.1	2.91e-54	179	target replacement
CP054920.1.region015	CP0549200033	rif_monoox-NCBIFAM|rifampin monooxygenase	7.9e-43	142.2	product inactivation
CP054920.1.region015	CP0549200069	ARO:3002919|vanRA|AAA65953.1	1.27e-44	147	target alteration
CP054920.1.region015	CP0549200036	BGC0001140|Resistance_gene|ACS13710.1	3.78e-56	184	target replacement
CP031969.1.region010	CP0319690004	ARO:3002700|cmlv|AAB36568.1	1.01e-71	229	product inactivation	GCF_00558	BGC0000234 BGC0000223	PKS	jadomycin (C24H21N1O6) rabelomycin, dehydrorabelomycin, fluostatin F, fluostatin G, fluostatin H
CP031969.1.region010	CP0319690016	ARO:3002884|iri|AAB41059.1	4.65e-101	308	product inactivation
CP031969.1.region010	CP0319690039	ARO:3002884|iri|AAB41059.1	1.19e-72	235	product inactivation
CP031969.1.region010	CP0319690040	ARO:3002884|iri|AAB41059.1	1.84e-85	269	product inactivation
CP031969.1.region010	CP0319690030	ARO:3002919|vanRA|AAA65953.1	1.61e-33	117	target alteration
CP031969.1.region010	CP0319690059	ARO:3002919|vanRA|AAA65953.1	7.66e-38	129	target alteration
CP031969.1.region010	CP0319690069	ARO:3002941|vanSO|AHA41504.1	2.14e-67	215	target alteration
CP031969.1.region010	CP0319690070	ARO:3002919|vanRA|AAA65953.1	7.6e-38	128	target alteration
CP031969.1.region010	CP0319690034	BGC0001140|Resistance_gene|ACS13710.1	4.35e-61	197	target replacement
CP031969.1.region010	CP0319690035	BGC0001140|Resistance_gene|ACS13710.1	8.51e-34	123	target replacement
CP056041.1.region032	CP0560410039	ARO:3002884|iri|AAB41059.1	1.03e-70	229	product inactivation
CP056041.1.region032	CP0560410044	ARO:3002884|iri|AAB41059.1	2.56e-93	289	product inactivation
CP056041.1.region032	CP0560410030	ARO:3002919|vanRA|AAA65953.1	2.74e-39	133	target alteration
CP056041.1.region032	CP0560410034	BGC0001140|Resistance_gene|ACS13710.1	2.71e-65	208	target replacement
CP056041.1.region032	CP0560410035	BGC0001140|Resistance_gene|ACS13710.1	7.1e-33	121	target replacement
CP027796.1.region008	CP0277960016	ARO:3000444|rphA|AIA08936.1	8.3e-74	256	product inactivation	GCF_00581	BGC0000259	PKS	prodigiosin
CP027798.1.region006	CP0277980010	ARO:3000444|rphA|AIA08936.1	1.49e-75	261	product inactivation
CP029043.1.region009	CP0290430041	rif_monoox-NCBIFAM|rifampin monooxygenase	1.4e-47	157.9	product inactivation	GCF_00594	BGC0000272	PKS	spore pigment (structure)
CP029043.1.region009	CP0290430025	ARO:3002919|vanRA|AAA65953.1	3.77e-45	147	target alteration
CP029043.1.region009	CP0290430035	BGC0001140|Resistance_gene|ACS13710.1	1.23e-56	185	target replacement
CP029188.1.region003	CP0291880023	rif_monoox-NCBIFAM|rifampin monooxygenase	4.9e-40	133	product inactivation
CP029188.1.region003	CP0291880026	BGC0001140|Resistance_gene|ACS13710.1	7.5e-61	196	target replacement
CP029188.1.region003	CP0291880027	BGC0001140|Resistance_gene|ACS13710.1	9.93e-34	123	target replacement
CP029254.1.region009	CP0292540020	rif_monoox-NCBIFAM|rifampin monooxygenase	1.5e-39	131.4	product inactivation
CP029254.1.region009	CP0292540023	BGC0001140|Resistance_gene|ACS13710.1	8.76e-62	199	target replacement
CP033581.1.region026	CP0335810055	ARO:3002884|iri|AAB41059.1	2.67e-44	160	product inactivation
CP033581.1.region026	CP0335810048	rif_monoox-NCBIFAM|rifampin monooxygenase	1.8e-41	137.7	product inactivation
CP033581.1.region026	CP0335810045	BGC0001140|Resistance_gene|ACS13710.1	1.56e-59	193	target replacement
CP033581.1.region026	CP0335810044	BGC0001140|Resistance_gene|ACS13710.1	3.62e-34	125	target replacement
CP054939.1.region020	CP0549390057	rif_monoox-NCBIFAM|rifampin monooxygenase	8.1e-44	145.4	product inactivation
CP054939.1.region020	CP0549390054	BGC0001140|Resistance_gene|ACS13710.1	7.93e-58	188	target replacement
AP008957.1.region009	AP0089570011	ribo_prot_ABC_F-NCBIFAM|ABC-F type ribosomal protection protein	1.2e-44	148.2	target protection	GCF_00687	BGC0000371	NRP	heterobactin A (C27H33N7O10) heterobactin S2 (C28H35N7O12S1)
CP012749.1.region012	CP0127490010	ABCF_producer-NCBIFAM|TlrC/CarA/OleB/SrmB family ABC-F type ribosomal protection protein	1.1e-35	118.2	target protection
CP023720.1.region011	CP0237200031	ABCF_producer-NCBIFAM|TlrC/CarA/OleB/SrmB family ABC-F type ribosomal protection protein	1.8e-35	117.6	target protection
CP018047.1.region028	CP0180470013	ARO:3002884|iri|AAB41059.1	1.65e-69	227	product inactivation	GCF_00709	BGC0000394	NRP	naphthyridinomycin
CP047318.1.region001	CP0473180037	ARO:3000205|tetX|AAA27471.1	4.42e-47	162	product inactivation
CP047318.1.region001	CP0473180031	ARO:3002884|iri|AAB41059.1	1.18e-72	235	product inactivation
CP030925.1.region001	CP0309250008	ARO:3002700|cmlv|AAB36568.1	6.52e-38	139	product inactivation	GCF_00868	BGC0000560	RiPP	subtilomycin (no structure)
CP030925.1.region001	CP0309250017	ARO:3002922|vanRC|AAF86641.1	8.09e-34	118	target alteration
CP060417.1.region001	CP0604170007	ARO:3002700|cmlv|AAB36568.1	2.32e-37	137	product inactivation
CP060417.1.region001	CP0604170016	ARO:3002922|vanRC|AAF86641.1	3.53e-33	116	target alteration
CP029609.1.region001	CP0296090008	ARO:3002700|cmlv|AAB36568.1	5.27e-38	139	product inactivation	GCF_00909	BGC0000601	RiPP	sporulation killing factor (no structure)
CP029609.1.region001	CP0296090018	ARO:3002922|vanRC|AAF86641.1	3.48e-34	119	target alteration
CP039935.1.region001	CP0399350009	ARO:3002700|cmlv|AAB36568.1	6.52e-38	139	product inactivation
CP039935.1.region001	CP0399350018	ARO:3002922|vanRC|AAF86641.1	3.42e-33	117	target alteration
CP018047.1.region026	CP0180470001	ARO:3000195|tetB(P)|AAA20117.1	3.74e-160	473	target protection	GCF_01148	BGC0000853	Others	ectoine
CP020694.1.region005	CP0206940001	ARO:3003907|cipA|ACX65640.1	4.32e-47	161	target alteration	GCF_01155	BGC0000860	Others	ectoine
CP044399.1.region003	CP0443990017	ARO:3000884|TEM-12|AAA25053.1	2.53e-66	206	product inactivation	GCF_01159	BGC0000864	Others	eicosapentaenoic acid-like compound (no structure)
CP029254.1.region005	CP0292540029	BGC0001140|Resistance_gene|ACS13710.1	3.2e-61	197	target replacement	GCF_01232	BGC0000940 BGC0001453	Others	desferrioxamin B, desferrioxamin E desferrioxamine
CP014859.1.region011	CP0148590002	ARO:3002700|cmlv|AAB36568.1	4.58e-66	214	product inactivation	GCF_01332	BGC0001043	PKS-NRP	SGR PTMs, SGR PTM Compound b SGR PTM Compound c SGR PTM Compound d
CP014859.1.region011	CP0148590009	ARO:3002700|cmlv|AAB36568.1	4.77e-76	239	product inactivation
CP020570.1.region029	CP0205700006	ARO:3003061|viomycin|CAA26235.1	0	561	product inactivation
CP029609.1.region005	CP0296090022	BGC0001140|Resistance_gene|ACS13710.1	8e-40	140	target replacement	GCF_01375	BGC0001089	PKS-NRP	bacillaene
CP030925.1.region004	CP0309250022	BGC0001140|Resistance_gene|ACS13710.1	1.19e-39	139	target replacement
CP039935.1.region004	CP0399350022	BGC0001140|Resistance_gene|ACS13710.1	6.94e-40	140	target replacement
CP060417.1.region004	CP0604170022	BGC0001140|Resistance_gene|ACS13710.1	1.19e-39	139	target replacement
CP010406.1.region003	CP0104060038	ARO:3002829|vgaA|AAA26684.1	1.09e-40	151	target protection	GCF_01629	BGC0001383 BGC0000181	PKS	macrolactin H, macrolactin B, macrolactin 1c, macrolactin E macrolactin H (C24H34O5)
CP010406.1.region003	CP0104060032	HK_VanS_ACDEFG-NCBIFAM|vancomycin resistance histidine kinase VanS	2.4e-31	104.1	target protection
CP017775.1.region005	CP0177750005	ARO:3002829|vgaA|AAA26684.1	5.52e-41	152	target protection
CP017775.1.region005	CP0177750011	HK_VanS_ACDEFG-NCBIFAM|vancomycin resistance histidine kinase VanS	2.4e-31	104.1	target protection
CP030097.1.region004	CP0300970005	ARO:3002829|vgaA|AAA26684.1	1.04e-40	151	target protection
CP030097.1.region004	CP0300970011	HK_VanS_ACDEFG-NCBIFAM|vancomycin resistance histidine kinase VanS	3.4e-31	103.6	target protection
CP061938.1.region005	CP0619380005	ARO:3002829|vgaA|AAA26684.1	1.43e-40	150	target protection
CP061938.1.region005	CP0619380011	HK_VanS_ACDEFG-NCBIFAM|vancomycin resistance histidine kinase VanS	1.7e-31	104.6	target protection
CP002830.1.region020	CP0028300031	D_ala_D_ser_VanN-NCBIFAM|D-alanine--D-serine ligase VanN	1.1e-39	131.7	target protection	GCF_01663	BGC0001420 BGC0001417 BGC0001418 BGC0001419 BGC0001424	PKS-NRP	myxochromide D (C39H56N6O8) myxochromide D (C39H56N6O8) myxochromide D myxochromide D myxochromide C (C42H58N6O8)
CP029188.1.region023	CP0291880087	rif_mono_Iri-NCBIFAM|rifampin monooxygenase Iri	1.4e-32	108.5	product inactivation	GCF_01807	BGC0001568 BGC0001074 BGC0001558	PKS	cytorhodin (C48H68N2O15) cosmomycin D (C60H88N2O22) cosmomycin C (C60H88N2O21)
CP029188.1.region023	CP0291880067	BGC0001140|Resistance_gene|ACS13710.1	5.37e-58	189	target replacement
CP043317.1.region018	CP0433170010	ARO:3004613|Tet(47)|AKQ05891.1	8.85e-70	223	product inactivation	GCF_01948	BGC0001719 BGC0001179	PKS	olimycin A (C31H35N1O7) rishirilide A (C42H48O13), B (C21H24O6)
CP043317.1.region018	CP0433170060	rif_monoox-NCBIFAM|rifampin monooxygenase	1.4e-49	164.4	product inactivation
CP043317.1.region018	CP0433170038	BGC0001140|Resistance_gene|ACS13710.1	1.54e-69	219	target replacement
CP003241.1.region002	CP0032410009	bla_class_C-NCBIFAM|class C beta-lactamase	3.6e-31	103.4	product inactivation	GCF_02105	BGC0001890	NRP	amphi-enterobactin 1, 2, 3, 4 (no structure)
CP003241.1.region002	CP0032410026	ARO:3002919|vanRA|AAA65953.1	1.82e-40	136	target alteration
CP033134.1.region002	CP0331340005	ARO:3002700|cmlv|AAB36568.1	1.92e-62	204	product inactivation
CM002271.1.region016	CM0022710010	ARO:3000412|sul2|AAL59753.1	1.1e-35	125	target replacement	GCF_02294	BGC0001792	NRP	surugamide A (C48H81N9O8), D (C47H79N9O8)
CM002273.1.region017	CM0022730010	ARO:3000412|sul2|AAL59753.1	1.22e-35	125	target replacement
CP064783.1.region013	CP0647830010	ARO:3000412|sul2|AAL59753.1	9.97e-36	126	target replacement
CP064783.1.region017	CP0647830041	ARO:3002658|APH(6)-Ib|CAA29136.1	7.26e-38	134	product inactivation	GCF_02301	BGC0000034	PKS-NRP	candicidin (C59H84N2O18)
CP000020.2.region001	CP0000200021	BGC0001140|Resistance_gene|ACS13710.1	5.25e-32	118	target replacement	GCF_02333	BGC0000837	Others	APE Vf (C22H24O3)
CP000020.2.region001	CP0000200024	BGC0001140|Resistance_gene|ACS13710.1	6.45e-54	177	target replacement
CP001139.1.region001	CP0011390021	BGC0001140|Resistance_gene|ACS13710.1	7.67e-32	117	target replacement
CP001139.1.region001	CP0011390024	BGC0001140|Resistance_gene|ACS13710.1	6.45e-54	177	target replacement
CP034240.1.region001	CP0342400021	BGC0001140|Resistance_gene|ACS13710.1	8.75e-50	167	target replacement
CP034240.1.region001	CP0342400024	BGC0001140|Resistance_gene|ACS13710.1	4.38e-31	115	target replacement
FM178379.1.region002	FM1783790021	BGC0001140|Resistance_gene|ACS13710.1	7.17e-50	167	target replacement
FM178379.1.region002	FM1783790024	BGC0001140|Resistance_gene|ACS13710.1	3.86e-31	116	target replacement
LN554846.1.region001	LN5548460024	BGC0001140|Resistance_gene|ACS13710.1	5.95e-53	175	target replacement
CP000667.1.region006	CP0006670020	BGC0000240|glyoxalase/bleomycin_resistance_protein|AHZ61839.1	3.23e-41	129	product inactivate	GCF_02542	BGC0000240 BGC0000241	PKS (Angucycline) PKS	lomaiviticin A, C, D, E
CP000667.1.region006	CP0006670021	BGC0000240|glyoxalase/bleomycin_resistance_protein/dioxygenase|AHZ61880.1	2.72e-176	479	product inactivate
CP000667.1.region006	CP0006670006	ARO:3002884|iri|AAB41059.1	1.95e-82	261	product inactivation
CP000667.1.region006	CP0006670008	ARO:3002884|iri|AAB41059.1	1.26e-64	213	product inactivation
CP000667.1.region006	CP0006670009	ARO:3002884|iri|AAB41059.1	7.77e-86	269	product inactivation
CP000667.1.region006	CP0006670033	BGC0001140|Resistance_gene|ACS13710.1	6.56e-68	214	target replacement
CP000667.1.region006	CP0006670034	BGC0001140|Resistance_gene|ACS13710.1	1.66e-35	129	target replacement
AP011177.1.region001	AP0111770025	ARO:3000195|tetB(P)|AAA20117.1	5.42e-41	156	target protection	GCF_02631	BGC0000862	Others	eicosapentaenoic acid
CP000931.1.region006	CP0009310019	ARO:3000192|tetS|AAA25293.1	2.25e-46	171	target protection
CP020472.1.region002	CP0204720024	ARO:3000192|tetS|AAA25293.1	1.52e-52	189	target protection
CP022272.1.region001	CP0222720006	ARO:3002919|vanRA|AAA65953.1	6.23e-35	121	target alteration
CP022272.1.region001	CP0222720022	ARO:3000195|tetB(P)|AAA20117.1	7.85e-51	184	target protection
CP036200.1.region004	CP0362000032	ARO:3002919|vanRA|AAA65953.1	4.39e-45	147	target alteration
CP036200.1.region004	CP0362000033	HK_VanS_ACDEFG-NCBIFAM|vancomycin resistance histidine kinase VanS	4.4e-36	119.7	target protection
CP041153.1.region001	CP0411530005	ARO:3002919|vanRA|AAA65953.1	3.69e-35	122	target alteration
CP041153.1.region001	CP0411530022	ARO:3000195|tetB(P)|AAA20117.1	4.22e-50	182	target protection
CP062058.1.region001	CP0620580027	ARO:3000192|tetS|AAA25293.1	7.75e-52	187	target protection
CP068437.1.region006	CP0684370021	ARO:3000195|tetB(P)|AAA20117.1	1.76e-46	172	target protection
CP001135.1.region002	CP0011350019	BGC0001140|Resistance_gene|ACS13710.1	5.39e-32	118	target replacement	GCF_03333	BGC0000836	Others	APE Ec (C21H22O3)
CP001135.1.region002	CP0011350016	BGC0001140|Resistance_gene|ACS13710.1	1.02e-48	164	target replacement
CP006664.1.region004	CP0066640019	BGC0001140|Resistance_gene|ACS13710.1	1.22e-49	166	target replacement
CP006664.1.region004	CP0066640022	BGC0001140|Resistance_gene|ACS13710.1	9.51e-34	123	target replacement
CP040443.1.region001	CP0404430025	BGC0001140|Resistance_gene|ACS13710.1	4.62e-31	115	target replacement
CP040443.1.region001	CP0404430028	BGC0001140|Resistance_gene|ACS13710.1	7.36e-52	172	target replacement
CP002973.1.region001	CP0029730022	ribo_prot_ABC_F-NCBIFAM|ABC-F type ribosomal protection protein	2.5e-42	140.5	target protection	GCF_03830	BGC0000932	Others	tropodithietic acid (C8H4O3S2), hydroxytropodithietic acid (C8H4O4S2)
CP006967.1.region001	CP0069670022	ribo_prot_ABC_F-NCBIFAM|ABC-F type ribosomal protection protein	1e-41	138.5	target protection
CP010589.1.region001	CP0105890022	ribo_prot_ABC_F-NCBIFAM|ABC-F type ribosomal protection protein	1e-41	138.5	target protection
CP010596.1.region001	CP0105960022	ribo_prot_ABC_F-NCBIFAM|ABC-F type ribosomal protection protein	4.7e-42	139.6	target protection
CP010600.1.region001	CP0106000022	ribo_prot_ABC_F-NCBIFAM|ABC-F type ribosomal protection protein	2.9e-42	140.3	target protection
CP010612.1.region001	CP0106120022	ribo_prot_ABC_F-NCBIFAM|ABC-F type ribosomal protection protein	1.4e-42	141.3	target protection
CP010624.1.region001	CP0106240022	ribo_prot_ABC_F-NCBIFAM|ABC-F type ribosomal protection protein	2.6e-42	140.5	target protection
CP010630.1.region001	CP0106300016	ribo_prot_ABC_F-NCBIFAM|ABC-F type ribosomal protection protein	5e-42	139.5	target protection
CP010637.1.region001	CP0106370022	ribo_prot_ABC_F-NCBIFAM|ABC-F type ribosomal protection protein	1e-41	138.5	target protection
CP010651.1.region001	CP0106510022	ribo_prot_ABC_F-NCBIFAM|ABC-F type ribosomal protection protein	7.5e-42	139	target protection
CP010663.1.region001	CP0106630022	ribo_prot_ABC_F-NCBIFAM|ABC-F type ribosomal protection protein	1.4e-42	141.3	target protection
CP010669.1.region001	CP0106690022	ribo_prot_ABC_F-NCBIFAM|ABC-F type ribosomal protection protein	2.6e-42	140.5	target protection
CP010674.1.region001	CP0106740022	ribo_prot_ABC_F-NCBIFAM|ABC-F type ribosomal protection protein	1e-41	138.5	target protection
CP010706.1.region001	CP0107060022	ribo_prot_ABC_F-NCBIFAM|ABC-F type ribosomal protection protein	2.9e-42	140.3	target protection
CP010726.1.region001	CP0107260022	ribo_prot_ABC_F-NCBIFAM|ABC-F type ribosomal protection protein	2.3e-42	140.7	target protection
CP010736.1.region001	CP0107360022	ribo_prot_ABC_F-NCBIFAM|ABC-F type ribosomal protection protein	2.2e-41	137.4	target protection
CP010742.1.region001	CP0107420022	ribo_prot_ABC_F-NCBIFAM|ABC-F type ribosomal protection protein	9.4e-42	138.6	target protection
CP010746.1.region001	CP0107460022	ribo_prot_ABC_F-NCBIFAM|ABC-F type ribosomal protection protein	9e-42	138.7	target protection
CP010751.1.region001	CP0107510022	ribo_prot_ABC_F-NCBIFAM|ABC-F type ribosomal protection protein	1.4e-42	141.3	target protection
CP010757.1.region001	CP0107570022	ribo_prot_ABC_F-NCBIFAM|ABC-F type ribosomal protection protein	2.9e-42	140.3	target protection
CP010785.1.region001	CP0107850022	ribo_prot_ABC_F-NCBIFAM|ABC-F type ribosomal protection protein	1e-41	138.5	target protection
CP019308.1.region001	CP0193080022	ribo_prot_ABC_F-NCBIFAM|ABC-F type ribosomal protection protein	3.6e-41	136.7	target protection
CP021041.1.region001	CP0210410022	ribo_prot_ABC_F-NCBIFAM|ABC-F type ribosomal protection protein	7.4e-42	139	target protection
CP021048.1.region001	CP0210480022	ribo_prot_ABC_F-NCBIFAM|ABC-F type ribosomal protection protein	7.4e-42	139	target protection
CP031949.1.region001	CP0319490022	ribo_prot_ABC_F-NCBIFAM|ABC-F type ribosomal protection protein	4.7e-42	139.6	target protection
CP031953.1.region001	CP0319530022	ribo_prot_ABC_F-NCBIFAM|ABC-F type ribosomal protection protein	2.5e-42	140.5	target protection
CP005941.1.region003	CP0059410018	BGC0000832|clorobiocin-resistant_gyrase_B|AAN65247.1	0	568	target alteration	GCF_03902	BGC0000566	RiPP (LAP)	streptolysin S (no structure)
CP010783.1.region003	CP0107830017	BGC0000832|clorobiocin-resistant_gyrase_B|AAN65247.1	0	568	target alteration
CP022392.1.region003	CP0223920017	BGC0000832|clorobiocin-resistant_gyrase_B|AAN65247.1	0	568	target alteration
CP011492.1.region001	CP0114920021	ARO:3002884|iri|AAB41059.1	3.97e-65	215	product inactivation	GCF_04070	BGC0000164	PKS	tetronomycin
CP025407.1.region028	CP0254070043	ARO:3002884|iri|AAB41059.1	6.67e-66	218	product inactivation
CP013187.1.region001	CP0131870014	ARO:3002924|vanRE|AAL27445.1	2.41e-37	127	target alteration
CP013187.1.region001	CP0131870015	HK_VanS_ACDEFG-NCBIFAM|vancomycin resistance histidine kinase VanS	3.2e-32	107	target protection
CP017599.1.region032	CP0175990021	BGC0001140|Resistance_gene|ACS13710.1	5.68e-39	137	target replacement	GCF_04716	BGC0000976 BGC0001165	PKS-NRP	curacin A (C23H35N1O1S1) curacin A
CP020822.1.region002	CP0208220010	CHL_hydrolase-NCBIFAM|chloramphenicol hydrolase	1.2e-53	177.2	product inactivation	GCF_05210	BGC0001531	Others	bisucaberin B
CP032544.1.region002	CP0325440010	CHL_hydrolase-NCBIFAM|chloramphenicol hydrolase	7.1e-59	194.4	product inactivation
CP045192.1.region002	CP0451920010	CHL_hydrolase-NCBIFAM|chloramphenicol hydrolase	7.1e-59	194.4	product inactivation
LT634361.1.region001	LT6343610010	CHL_hydrolase-NCBIFAM|chloramphenicol hydrolase	1.2e-53	177.3	product inactivation
CP000644.1.region002	CP0006440023	ribo_prot_ABC_F-NCBIFAM|ABC-F type ribosomal protection protein	3.2e-33	110.5	target protection	GCF_05426	BGC0001502	NRP	amonabactin P 750
CP022175.1.region002	CP0221750025	ribo_prot_ABC_F-NCBIFAM|ABC-F type ribosomal protection protein	1.4e-33	111.7	target protection
CP022181.1.region002	CP0221810025	ribo_prot_ABC_F-NCBIFAM|ABC-F type ribosomal protection protein	1.4e-33	111.7	target protection
CP022186.1.region002	CP0221860025	ribo_prot_ABC_F-NCBIFAM|ABC-F type ribosomal protection protein	1.4e-33	111.7	target protection
CP022101.1.region001	CP0221010028	ARO:3002700|cmlv|AAB36568.1	2.42e-65	211	product inactivation	GCF_05496	BGC0000454	NRP	vanchrobactin
CP001806.1.region001	CP0018060001	ARO:3002919|vanRA|AAA65953.1	3.02e-33	117	target alteration	GCF_05887	BGC0000946 BGC0000947	Others	vibrioferrin (C16H22N2O12) vibrioferrin (C16H22N2O12) (different structure)
CP003973.1.region001	CP0039730009	ARO:3002919|vanRA|AAA65953.1	2.11e-33	117	target alteration
CP007005.1.region001	CP0070050009	ARO:3002919|vanRA|AAA65953.1	1.08e-33	118	target alteration
CP010884.1.region001	CP0108840009	ARO:3002919|vanRA|AAA65953.1	2.11e-33	117	target alteration
CP013485.1.region001	CP0134850001	ARO:3002919|vanRA|AAA65953.1	2.11e-33	117	target alteration
CP013827.1.region001	CP0138270009	ARO:3002919|vanRA|AAA65953.1	2.11e-33	117	target alteration
CP014041.1.region001	CP0140410009	ARO:3002919|vanRA|AAA65953.1	2.37e-33	117	target alteration
CP016225.1.region001	CP0162250009	ARO:3002919|vanRA|AAA65953.1	1.39e-33	118	target alteration
CP017890.1.region001	CP0178900001	ARO:3002919|vanRA|AAA65953.1	2.11e-33	117	target alteration
CP017897.1.region001	CP0178970001	ARO:3002919|vanRA|AAA65953.1	2.11e-33	117	target alteration
CP017900.1.region001	CP0179000001	ARO:3002919|vanRA|AAA65953.1	2.11e-33	117	target alteration
CP017908.1.region001	CP0179080001	ARO:3002919|vanRA|AAA65953.1	2.11e-33	117	target alteration
CP017912.1.region001	CP0179120001	ARO:3002919|vanRA|AAA65953.1	2.11e-33	117	target alteration
CP017914.1.region001	CP0179140001	ARO:3002919|vanRA|AAA65953.1	2.11e-33	117	target alteration
CP017918.1.region001	CP0179180001	ARO:3002919|vanRA|AAA65953.1	2.11e-33	117	target alteration
CP020035.1.region001	CP0200350009	ARO:3002919|vanRA|AAA65953.1	2.11e-33	117	target alteration
CP028142.1.region001	CP0281420002	ARO:3002919|vanRA|AAA65953.1	2.11e-33	117	target alteration
CP028343.1.region001	CP0283430009	ARO:3002919|vanRA|AAA65953.1	2.11e-33	117	target alteration
CP032214.1.region001	CP0322140002	ARO:3002919|vanRA|AAA65953.1	2.11e-33	117	target alteration
CP033142.1.region001	CP0331420009	ARO:3002919|vanRA|AAA65953.1	1.08e-33	118	target alteration
CP034566.1.region001	CP0345660009	ARO:3002919|vanRA|AAA65953.1	2.11e-33	117	target alteration
CP065370.1.region001	CP0653700001	ARO:3002919|vanRA|AAA65953.1	2.11e-33	117	target alteration
WAHT01000009.1.region001	WAHT010000090002	ARO:3002919|vanRA|AAA65953.1	6.51e-33	116	target alteration
CP029254.1.region005	CP0292540029	BGC0001140|Resistance_gene|ACS13710.1	3.2e-61	197	target replacement	GCF_06091	BGC0000190 BGC0000224	PKS	A-74528 fredericamycin A
CP010406.1.region001	CP0104060049	ARO:3002919|vanRA|AAA65953.1	1.7e-56	177	target alteration	GCF_06197	BGC0001090 BGC0001098	PKS-NRP	bacillomycin D iturin
CP010406.1.region001	CP0104060050	HK_VanS_ACDEFG-NCBIFAM|vancomycin resistance histidine kinase VanS	2.1e-45	150.3	target protection
CP017775.1.region007	CP0177750016	ARO:3002919|vanRA|AAA65953.1	1.7e-56	177	target alteration
CP017775.1.region007	CP0177750015	HK_VanS_ACDEFG-NCBIFAM|vancomycin resistance histidine kinase VanS	8.6e-45	148.3	target protection
CP030097.1.region006	CP0300970014	ARO:3002919|vanRA|AAA65953.1	3.13e-56	176	target alteration
CP030097.1.region006	CP0300970013	HK_VanS_ACDEFG-NCBIFAM|vancomycin resistance histidine kinase VanS	1.3e-44	147.7	target protection
CP061938.1.region007	CP0619380056	ARO:3002700|cmlv|AAB36568.1	2.11e-36	134	product inactivation
CP061938.1.region007	CP0619380015	ARO:3002919|vanRA|AAA65953.1	1.92e-56	177	target alteration
CP061938.1.region007	CP0619380014	HK_VanS_ACDEFG-NCBIFAM|vancomycin resistance histidine kinase VanS	2.9e-44	146.6	target protection
CP017775.1.region011	CP0177750035	ARO:3002919|vanRA|AAA65953.1	1.77e-56	177	target alteration	GCF_06202	BGC0001184	Others	bacilysin
CP017775.1.region011	CP0177750034	HK_VanS_ACDEFG-NCBIFAM|vancomycin resistance histidine kinase VanS	4.7e-50	165.5	target protection
CP031642.1.region002	CP0316420001	HK_VanS_ACDEFG-NCBIFAM|vancomycin resistance histidine kinase VanS	5.5e-46	152.2	target protection	GCF_06430	BGC0000942	Others	petrobactin
CP031643.1.region002	CP0316430001	HK_VanS_ACDEFG-NCBIFAM|vancomycin resistance histidine kinase VanS	7.2e-46	151.8	target protection
CP032365.1.region004	CP0323650001	HK_VanS_ACDEFG-NCBIFAM|vancomycin resistance histidine kinase VanS	1.1e-45	151.2	target protection
CP040334.1.region011	CP0403340013	HK_VanS_ACDEFG-NCBIFAM|vancomycin resistance histidine kinase VanS	1.3e-44	147.7	target protection
CP040342.1.region009	CP0403420012	HK_VanS_ACDEFG-NCBIFAM|vancomycin resistance histidine kinase VanS	3.8e-44	146.2	target protection
CP053289.1.region007	CP0532890012	HK_VanS_ACDEFG-NCBIFAM|vancomycin resistance histidine kinase VanS	1.3e-44	147.7	target protection
CP043317.1.region009	CP0433170018	ABCF_producer-NCBIFAM|TlrC/CarA/OleB/SrmB family ABC-F type ribosomal protection protein	5e-33	109.5	target protection	GCF_06553	BGC0000663	Terpene	hopene
CP054939.1.region020	CP0549390057	rif_monoox-NCBIFAM|rifampin monooxygenase	8.1e-44	145.4	product inactivation
CP054939.1.region020	CP0549390054	BGC0001140|Resistance_gene|ACS13710.1	7.93e-58	188	target replacement
CP031969.1.region024	CP0319690023	ARO:3000444|rphA|AIA08936.1	0	1261	product inactivation	GCF_06575	BGC0001227 BGC0001456	Terpene	isorenieratene (no structure) isorenieratene (no structure)
CP000155.1.region012	CP0001550009	ARO:3000444|rphA|AIA08936.1	4.4e-73	255	product inactivation	GCF_06918	BGC0000260	PKS	prodigiosin
CP000155.1.region012	CP0001550027	ARO:3002919|vanRA|AAA65953.1	8.81e-42	140	target alteration
CP034836.1.region012	CP0348360008	ARO:3000444|rphA|AIA08936.1	2.72e-70	247	product inactivation
CP034836.1.region012	CP0348360028	ARO:3002919|vanRA|AAA65953.1	1.36e-42	142	target alteration
CP035490.1.region014	CP0354900008	ARO:3000444|rphA|AIA08936.1	2.72e-70	247	product inactivation
CP035490.1.region014	CP0354900028	ARO:3002919|vanRA|AAA65953.1	1.36e-42	142	target alteration
CP036534.1.region022	CP0365340005	rif_monoox-NCBIFAM|rifampin monooxygenase	7.9e-38	125.7	product inactivation	GCF_07155	BGC0001726	PKS-NRP	pactamides (no structure)
CP036534.1.region022	CP0365340026	ARO:3003785|Chlamydia|AAN28945	1.54e-40	149	target alteration
CP043317.1.region017	CP0433170029	rif_monoox-NCBIFAM|rifampin monooxygenase	1.5e-37	124.8	product inactivation
CP043317.1.region017	CP0433170009	ARO:3003785|Chlamydia|AAN28945	1.54e-40	149	target alteration
CP018047.1.region006	CP0180470031	ARO:3002658|APH(6)-Ib|CAA29136.1	1.86e-41	143	product inactivation	GCF_07166	BGC0000325	NRP	coelichelin
CP018047.1.region006	CP0180470030	ARO:3002985|arnA|AAG06942.1	4.42e-43	154	target alteration
CP018047.1.region006	CP0180470038	ribo_prot_ABC_F-NCBIFAM|ABC-F type ribosomal protection protein	1.2e-32	108.6	target protection
CP029043.1.region002	CP0290430025	ARO:3002985|arnA|AAG06942.1	3.51e-44	157	target alteration
CP036534.1.region033	CP0365340031	BGC0001447|Glyoxalase/bleomycin_resistance_protein/dioxygenase|EHK80150.1	4.27e-66	190	product inactivate
CP036534.1.region033	CP0365340024	ARO:3000205|tetX|AAA27471.1	1.02e-48	166	product inactivation
CP036534.1.region033	CP0365340022	ARO:3004613|Tet(47)|AKQ05891.1	2.62e-68	219	product inactivation
CP036534.1.region033	CP0365340009	ARO:3002985|arnA|AAG06942.1	2.58e-45	160	target alteration
CP038147.1.region025	CP0381470010	ARO:3002985|arnA|AAG06942.1	7.67e-42	150	target alteration
CP043317.1.region002	CP0433170005	BGC0001447|Glyoxalase/bleomycin_resistance_protein/dioxygenase|EHK80150.1	5.94e-66	189	product inactivate
CP043317.1.region002	CP0433170012	ARO:3000205|tetX|AAA27471.1	4.97e-48	164	product inactivation
CP043317.1.region002	CP0433170014	ARO:3004613|Tet(47)|AKQ05891.1	1.44e-68	220	product inactivation
CP043317.1.region002	CP0433170028	ARO:3002985|arnA|AAG06942.1	1.43e-45	160	target alteration
CP054920.1.region001	CP0549200006	BGC0001447|Glyoxalase/bleomycin_resistance_protein/dioxygenase|EHK80150.1	3.49e-66	190	product inactivate
CP054920.1.region001	CP0549200013	ARO:3000205|tetX|AAA27471.1	7.8e-51	172	product inactivation
CP054920.1.region001	CP0549200025	ARO:3002985|arnA|AAG06942.1	5.86e-42	150	target alteration
CP056041.1.region040	CP0560410046	ARO:3002985|arnA|AAG06942.1	4.66e-44	156	target alteration
CP040656.1.region010	CP0406560001	ARO:3002919|vanRA|AAA65953.1	8.98e-39	132	target alteration	GCF_07515	BGC0000999	PKS-NRP	heat-stable antifungal factor
CP039700.1.region003	CP0397000028	ARO:3002919|vanRA|AAA65953.1	7.21e-41	137	target alteration	GCF_07657	BGC0000865	Others	eicoseicosapentaenoic acid
CP041332.1.region004	CP0413320007	ARO:3002919|vanRA|AAA65953.1	6.01e-41	137	target alteration
CP007203.2.region007	CP0072030039	ribo_prot_ABC_F-NCBIFAM|ABC-F type ribosomal protection protein	2.8e-37	123.9	target protection	GCF_07771	BGC0001016 BGC0001017 BGC0001667 BGC0001705	PKS-NRP	microcystin microcystin LR microcystin-LR, microcystin-FR, microcystin-LA, microcystin-Laba, microcystin-LM, microcystin-LL nodularin
CP043056.1.region010	CP0430560028	vanH_gen-NCBIFAM|D-lactate dehydrogenase VanH	7.2e-34	112.5	target alteration
CP036534.1.region029	CP0365340037	ABCF_producer-NCBIFAM|TlrC/CarA/OleB/SrmB family ABC-F type ribosomal protection protein	6.2e-33	109.2	target protection	GCF_07786	BGC0000324	NRP	coelibactin (no structure)
CP043317.1.region009	CP0433170018	ABCF_producer-NCBIFAM|TlrC/CarA/OleB/SrmB family ABC-F type ribosomal protection protein	5e-33	109.5	target protection
CP054920.1.region004	CP0549200054	ribo_prot_ABC_F-NCBIFAM|ABC-F type ribosomal protection protein	2.7e-36	120.6	target protection
CP043317.1.region037	CP0433170057	ARO:3002539|AAC(3)-IV|ABB43029.1	0	516	product inactivation	GCF_07814	BGC0001004 BGC0001183	PKS	lobophorin B lobophorin A
CP043317.1.region037	CP0433170012	ARO:3000205|tetX|AAA27471.1	7.96e-44	153	product inactivation
CP043317.1.region037	CP0433170048	ARO:3000462|mgtA|ABA28305.2	2.12e-152	434	product inactivation
CP043317.1.region037	CP0433170071	ARO:3002884|iri|AAB41059.1	7.55e-78	248	product inactivation
CP043317.1.region037	CP0433170013	ARO:3001307|VgbA|AAA98349.1	1.08e-90	269	product inactivation
CP054916.1.region012	CP0549160005	BGC0001611|glyoxalase/bleomycin_resistance_protein|ATY69562.1	2.97e-38	119	product inactivate	GCF_08703	BGC0001513	PKS	anthrabenzoxocinone
CP054916.1.region012	CP0549160033	BGC0001140|Resistance_gene|ACS13710.1	2.81e-62	200	target replacement
CP056041.1.region021	CP0560410029	rif_monoox-NCBIFAM|rifampin monooxygenase	1.1e-42	141.7	product inactivation
CP056041.1.region021	CP0560410046	ARO:3002919|vanRA|AAA65953.1	1.04e-47	154	target alteration
CP056041.1.region021	CP0560410035	BGC0001140|Resistance_gene|ACS13710.1	1.45e-58	190	target replacement
CP010406.1.region001	CP0104060049	ARO:3002919|vanRA|AAA65953.1	1.7e-56	177	target alteration	GCF_08847	BGC0001095	NRP	fengycin
CP010406.1.region001	CP0104060050	HK_VanS_ACDEFG-NCBIFAM|vancomycin resistance histidine kinase VanS	2.1e-45	150.3	target protection
CP030097.1.region006	CP0300970014	ARO:3002919|vanRA|AAA65953.1	3.13e-56	176	target alteration
CP030097.1.region006	CP0300970013	HK_VanS_ACDEFG-NCBIFAM|vancomycin resistance histidine kinase VanS	1.3e-44	147.7	target protection
CP061938.1.region007	CP0619380056	ARO:3002700|cmlv|AAB36568.1	2.11e-36	134	product inactivation
CP061938.1.region007	CP0619380015	ARO:3002919|vanRA|AAA65953.1	1.92e-56	177	target alteration
CP061938.1.region007	CP0619380014	HK_VanS_ACDEFG-NCBIFAM|vancomycin resistance histidine kinase VanS	2.9e-44	146.6	target protection
